# Supplementary material for: The gut microbiota modulates the rate of ALS progression
Source: Research Square preprint supplement (doi:10.21203/rs.3.rs-6370840/v1), 2025-04-17
Supplement: Supplementary file 1 [file 28d96f392dcfb7eb7876e689.xlsx]

## Sheet: legend
Extended data Table 6. Microbial and metabolite markers associated with figure 6 and their correlations.

## Sheet: microbial biomarkers
ASV	Taxonomy	Mouse biomarker (corncob)	Human biomarker (corncob)	Biomarker Random Forest	enriched in
seq_1	Bacteria_Firmicutes_Bacilli_Erysipelotrichales_Erysipelotrichaceae_Turicibacter	yes			SLOW
seq_10	Bacteria_Firmicutes_Clostridia_Lachnospirales_Lachnospiraceae_Anaerostipes_caccae	yes			FAST
seq_13	Bacteria_Firmicutes_Clostridia_Lachnospirales_Lachnospiraceae_Blautia	yes			FAST
seq_41	Bacteria_Firmicutes_Bacilli_Erysipelotrichales_Erysipelotrichaceae_[Clostridium] innocuum group	yes			FAST
seq_64	Bacteria_Proteobacteria_Gammaproteobacteria_Enterobacterales_Enterobacteriaceae_Escherichia-Shigella	yes			FAST
seq_65	Bacteria_Firmicutes_Clostridia_Oscillospirales_Oscillospiraceae_Flavonifractor_plautii	yes			FAST
seq_103	Archaea_Euryarchaeota_Methanobacteria_Methanobacteriales_Methanobacteriaceae_Methanobrevibacter		yes		FAST
seq_109	Bacteria_Firmicutes_Clostridia_Lachnospirales_Lachnospiraceae_Blautia_massiliensis		yes		SLOW
seq_141	Bacteria_Firmicutes_Clostridia_Oscillospirales_Oscillospiraceae		yes		FAST
seq_247	Bacteria_Actinobacteriota_Coriobacteriia_Coriobacteriales_Coriobacteriaceae_Collinsella_aerofaciens		yes		FAST
seq_572	Bacteria_Firmicutes_Clostridia_Lachnospirales_Lachnospiraceae_Lachnoclostridium		yes		SLOW
seq_33	Bacteria_Desulfobacterota_Desulfovibrionia_Desulfovibrionales_Desulfovibrionaceae_Bilophila_wadsworthia			yes	SLOW
seq_15	Bacteria_Bacteroidota_Bacteroidia_Bacteroidales_Rikenellaceae_Alistipes_Alistipes Genus	yes		yes	FAST
seq_2	Bacteria_Bacteroidota_Bacteroidia_Bacteroidales_Bacteroidaceae_Bacteroides_vulgatus	yes	yes	yes	SLOW
seq_30	Bacteria_Bacteroidota_Bacteroidia_Bacteroidales_Tannerellaceae_Parabacteroides_distasonis			yes	SLOW
seq_3	Bacteria_Verrucomicrobiota_Verrucomicrobiae_Verrucomicrobiales_Akkermansiaceae_Akkermansia_muciniphila	yes		yes	FAST
seq_6	Bacteria_Bacteroidota_Bacteroidia_Bacteroidales_Bacteroidaceae_Bacteroides_Bacteroides Genus	yes		yes	SLOW
seq_49	Bacteria_Firmicutes_Clostridia_Lachnospirales_Lachnospiraceae_Lachnospiraceae NK4A136 group_bacterium			yes	SLOW
seq_32	Bacteria_Bacteroidota_Bacteroidia_Bacteroidales_Tannerellaceae_Parabacteroides_merdae	yes	yes	yes	SLOW
seq_11	Bacteria_Bacteroidota_Bacteroidia_Bacteroidales_Bacteroidaceae_Bacteroides_Bacteroides Genus	yes		yes	SLOW
seq_25	Bacteria_Firmicutes_Bacilli_Acholeplasmatales_Acholeplasmataceae_Anaeroplasma_Anaeroplasma Genus	yes		yes	FAST
seq_222	Bacteria_Bacteroidota_Bacteroidia_Bacteroidales_Marinifilaceae_Odoribacter_splanchnicus	yes		yes	SLOW
seq_349	Bacteria_Firmicutes_Clostridia_Lachnospirales_Lachnospiraceae_Lachnospiraceae UCG-010_Lachnospiraceae UCG-010 Genus			yes	SLOW
seq_83	Bacteria_Bacteroidota_Bacteroidia_Bacteroidales_Rikenellaceae_Alistipes_putredinis	yes		yes	SLOW
seq_44	Bacteria_Verrucomicrobiota_Verrucomicrobiae_Verrucomicrobiales_Akkermansiaceae_Akkermansia_Akkermansia Genus			yes	SLOW
seq_488	Bacteria_Firmicutes_Clostridia_Oscillospirales_Butyricicoccaceae_Butyricicoccus_Butyricicoccus Genus			yes	SLOW
seq_111	Bacteria_Bacteroidota_Bacteroidia_Bacteroidales_Rikenellaceae_Alistipes_finegoldii	yes		yes	SLOW

## Sheet: metabolite biomarkers
ID	Shared betweeen Cohort Stool and FMT recipients Cecum (Venn)	Shared betweeen FMT Donors Stool and FMT recipients Cecum (Venn)	PLSDA in FMT recipients (mouse)	MDA >2 (RF mouse data)	MDA >2 (RF FMT recipients and FMT donors)	enriched in	Exclusively in mouse data
2-myristoylglycerol (14:0)			x			slow	Y
6beta-hydroxylithocholate			x			slow	Y
X-21787			x			slow	Y
daidzein sulfate (2)			x			slow	Y
genistein sulfate*			x			slow	Y
N1,N10-dicoumaroylspermidine			x			fast	Y
X-15806			x			fast	Y
2-palmitoylglycerol (16:0)			x			fast	Y
X-11795			x			fast	Y
succinoyltaurine			x			fast	Y
2-hydroxysebacate			x	x	x	slow	no
3-hydroxysebacate			x		x	slow	no
3-hydroxysuberate			x	x	x	slow	no
4-acetamidobutanoate			x			slow	no
N-palmitoyl-sphinganine (d18:0/16:0)			x			slow	no
glycerol 3-phosphate			x			slow	no
guanidinoacetate			x			slow	no
histamine		x	x			slow	no
5-hydroxyindoleacetate	x					slow	no
enterodiol	x					slow	no
N-acetylhistamine					x	slow	no
octadecenedioate	x	x				slow	no
gamma-glutamyl-epsilon-lysine			x			fast	no
glycylisoleucine			x			fast	no
glycylvaline			x			fast	no
saccharopine			x		x	fast	no
X-26103	x		x			fast	no
3-methylglutarate/2-methylglutarate			x		x	fast	no
mannonate*			x			fast	no
glutaminylleucine			x			fast	no
X-14392			x			fast	no
X-25709	x	x	x	x		fast	no
bilirubin degradation product, C17H18N2O4 (3)**	x					fast	no
indoleacetate	x					fast	no
X-14383	x					fast	no
X-25522	x					fast	no
X-25534	x					fast	no
6-oxolithocholate		x	x			both	no
sucrose		x	x			both	no
sphingosine		x				both	no

## Sheet: Spearman corr p<0.05
RowNames	carnitine	benzoate	3-phenylpropionate (hydrocinnamate)	phenylacetate	hippurate	xanthurenate	suberate (C8-DC)	3-methyl-2-oxovalerate	methionine sulfoxide	3-methylhistidine	anserine	5-hydroxylysine	4-guanidinobutanoate	pimelate (C7-DC)	agmatine	cadaverine	diaminopimelate	2'-deoxycytidine	2'-deoxyinosine	FMN	glucuronate	glycerol 3-phosphate	imidazole lactate	indole	kynurenine	glycerophosphorylcholine (GPC)	allo-threonine	N-acetylglutamate	N-acetylmuramate	N-alpha-acetylornithine	protoporphyrin IX	tartarate	xanthosine	ribitol	2-isopropylmalate	quinate	gentisate	5-aminovalerate	homoserine	indolelactate	2'-deoxyadenosine 5'-monophosphate	N6-formyllysine	glycylvaline	gamma-glutamylphenylalanine	4-methyl-2-oxopentanoate	1-palmityl-GPC (O-16:0)	1,2-dipalmitoyl-GPC (16:0/16:0)	docosahexaenoate (DHA; 22:6n3)	alpha-hydroxyisocaproate
seq_1_Turicibacter Genus					0.647485																						0.425689																			0.436767	0.434106
seq_10_caccae	-0.44318		-0.516434																			-0.544042								-0.459481	-0.445218																	-0.416691
seq_100_Lachnospiraceae Family	0.528991		-0.444572																									0.499564
seq_101_Bacteroides Genus																						0.486989
seq_1013_NK4A214 group Genus					-0.518926										-0.48901																					-0.422327										-0.443721
seq_1015_massiliensis							0.416264																	0.490222					0.442534
seq_103_Methanobrevibacter Genus					-0.767948	-0.483971			-0.524814						-0.459026															-0.479958							-0.545134									-0.513903
seq_104_[Eubacterium] xylanophilum group Genus																							-0.441394					0.537191										0.435331							0.455339
seq_105_vulgatus			0.417872
seq_106_massiliensis			0.473605																					0.448173									0.545747														0.41716
seq_107_uniformis			0.417872
seq_108_Lachnoclostridium Genus										-0.439595												-0.56447	0.437064		-0.43886													-0.493595										-0.580502
seq_109_massiliensis					-0.878702						0.446871																																			-0.474541
seq_11_Bacteroides Genus																											-0.42395																	-0.438774					-0.552955
seq_110_GCA-900066575 Genus					0.632427	0.490233																																						0.476089		0.475335
seq_111_finegoldii					0.531579	0.635652					-0.509715																										0.425046									0.441255
seq_112_pectinilyticus			0.490824																							-0.434552
seq_114_Staphylococcus Genus					0.60744	0.485319			0.452121		-0.518625											0.519656								0.525326																0.524833
seq_115_obeum					-0.878702					0.414707	0.476981																				0.463295
seq_116_Oscillibacter Genus																											0.512893
seq_117_Lachnoclostridium Genus									0.60705																									0.498024										0.501015
seq_119_Streptococcus Genus					-0.985407	-0.493727					0.533368																																			-0.438331
seq_12_distasonis	0.480935
seq_120_Lachnoclostridium Genus
seq_121_Bacteroides Genus	0.502386		-0.520362								-0.502386						-0.470987									0.502386
seq_122_Lachnoclostridium Genus																																		0.463626						0.433607
seq_123_Roseburia Genus					-0.650039																																-0.427044
seq_124_Lachnospiraceae NK4A136 group Genus							0.47835					-0.510514	-0.443449				0.611795												0.41676		-0.499564				-0.568138								-0.504355
seq_125_Lachnospiraceae UCG-009 Genus																		0.422598																				-0.416535
seq_127_Turicibacter Genus												-0.41597			-0.421876		0.467439
seq_128_Oscillibacter Genus	-0.434507																									-0.466805												-0.535438
seq_129_wadsworthia															-0.415665
seq_13_Blautia Genus					0.504436	0.502007																									-0.522322							-0.605057
seq_130_[Eubacterium] xylanophilum group Genus													-0.421876			-0.437833	0.437064									-0.423564															-0.464178
seq_131_glucerasea											-0.442579			0.427627												-0.487434	0.475153
seq_132_cateniformis			-0.509966		0.569198	0.478195					-0.542171														-0.461169
seq_134_ovatus			0.503771																0.448559																	0.41417
seq_135_tayi																			-0.474244	-0.460557							-0.436316	-0.635063						-0.441505															-0.448924
seq_136_[Ruminococcus] gauvreauii group Genus					-0.767948	-0.483971
seq_137_Roseburia Genus	0.416974		-0.473527								-0.519299											0.519299				0.47709
seq_138_bacterium							0.438492						-0.438492											0.445657					0.486989									0.440513
seq_14_Bacteroides Genus			0.452166																							-0.557048
seq_140_Lachnospiraceae Family							0.464064																						0.439595		-0.419345				-0.579801								-0.430314					0.41597
seq_141_Oscillospiraceae Family			0.426508		-0.415536												0.547099
seq_144_bacterium																-0.479769																-0.418655										-0.433607
seq_145_laneus																						-0.650411	0.53229		-0.530926				-0.439588									-0.475473			-0.44867						-0.45155	-0.49192
seq_146_Ruminococcaceae Family										-0.45647												-0.566158	0.415126		-0.416917													-0.481783										-0.580502
seq_148_comes					-0.650039																																									-0.555833
seq_15_Alistipes Genus																						-0.566727	0.516766				0.439126								0.423509			-0.559157										-0.427947
seq_151_Colidextribacter Genus											-0.480927									0.446392																						-0.454067
seq_154_Lachnospiraceae Family	-0.448239																							0.423967			0.44592
seq_156_Ruminococcaceae Family									0.438492										0.48901						0.422431					0.422327
seq_157_Lachnoclostridium Genus																																			-0.451738								-0.420306
seq_158_longicatena					-0.767948																										0.418655
seq_16_bacterium					0.64639						-0.566456																																			0.420813
seq_161_finegoldii															-0.479034							0.428393		-0.478164											-0.521934
seq_163_Roseburia Genus																												0.583252										0.427206				-0.478369
seq_164_prausnitzii					-0.650039							-0.413439				-0.454331														-0.452251																-0.555833
seq_166_Lachnoclostridium Genus	-0.496126																	0.461533				-0.541689	0.527345		-0.525788													-0.417657
seq_167_caecimuris					-0.878702		-0.45303			0.483825	0.693915			-0.505039													-0.552255							-0.450746										-0.553079
seq_169_Lachnospiraceae NK4A136 group Genus									0.444554										0.486989						0.414346					0.414244
seq_17_Blautia Genus																									0.461633															-0.432992						0.439755
seq_172_Lachnospiraceae Family	0.499396		-0.520362								-0.511358						-0.435103									0.472482
seq_173_Roseburia Genus									0.425656																								-0.417444
seq_175_inops																								-0.47965				-0.49192						-0.420254
seq_176_bacterium	-0.423141						0.438093										0.424636			0.475473				0.488643		-0.432112				-0.445569
seq_177_Lachnospiraceae Family	0.506251		-0.440467								-0.438751						-0.501189									0.561095		0.458158
seq_178_Bacteroides Genus											-0.469126
seq_179_Lachnospiraceae UCG-001 Genus							0.503238					-0.444426					0.519002												0.482623		-0.558412				-0.513065								-0.445032					0.417748
seq_180_hadrus					-0.878702					0.472191	0.520779																				0.496143
seq_181_Incertae Sedis Genus							0.464064																						0.439595		-0.419345				-0.579801								-0.430314					0.41597
seq_182_Lachnospiraceae Family									0.516741																		0.44237							0.585955
seq_183_paraputrificum																	0.444554			0.438492																					-0.450728
seq_184_Bifidobacterium Genus					-0.650039					0.525658	0.491908																-0.554451																	-0.492451
seq_185_Lachnospiraceae NK4A136 group Genus											-0.486989
seq_187_[Eubacterium] hallii group Genus					-0.767948																																									-0.656654
seq_189_Barnesiellaceae Family	0.502386		-0.520362								-0.502386						-0.470987									0.502386
seq_19_[Ruminococcus] gnavus group Genus					-0.421315						0.529309
seq_190_Romboutsia Genus					-0.579651				-0.668949							-0.5733					-0.546159	-0.416974								-0.683019		-0.43616														-0.430618
seq_191_Agathobacter Genus					-0.767948																																									-0.471078
seq_192_Clostridia vadinBB60 group Order			-0.595409														-0.709655								-0.536651			0.424287																					0.475613
seq_194_Lachnospiraceae Family																	0.542042																		-0.601609
seq_195_Blautia Genus					-0.518926									-0.444554													-0.442618																	-0.48812		-0.443721			-0.462741
seq_196_hadrus					-0.650039
seq_198_Incertae Sedis Genus																		-0.422736								0.423251
seq_2_vulgatus				0.417659													0.501888								0.503009				0.430119						-0.489549				0.650411									0.644929
seq_20_excrementihominis																																			-0.426732
seq_200_Incertae Sedis Genus					-0.767948																																									-0.656654
seq_202_[Eubacterium] coprostanoligenes group Family				0.422327																																									0.422327
seq_204_[Ruminococcus] torques group Genus					-0.93422						0.56205			-0.446851
seq_205_Lachnospiraceae Family			0.520385						0.451964																		0.561406																	0.413725
seq_206_[Eubacterium] fissicatena group Genus					0.504436																										-0.489428							-0.481454
seq_207_[Eubacterium] hallii group Genus					-0.878702						0.494774			-0.482456																																-0.45047
seq_208_Lachnospiraceae UCG-001 Genus																																					0.428732			0.425251
seq_21_Hungatella Genus																												-0.532132
seq_210_Bacteroides Genus									0.444554										0.486989						0.414346					0.414244
seq_212_Lachnospiraceae Family									0.548439										0.425251						0.497937					0.439595				0.494561										0.457427
seq_213_intestini							0.470987																						0.511358																				-0.435103
seq_214_Lachnospiraceae Family							0.438492						-0.438492											0.445657					0.486989									0.440513
seq_215_bicirculans					-0.650039
seq_216_Lachnoclostridium Genus							0.438492						-0.438492											0.445657					0.486989									0.440513
seq_218_Turicibacter Genus	-0.438492																						0.444554
seq_219_[Eubacterium] nodatum group Genus			0.493213	0.596584																				0.47965			0.413698
seq_22_Blautia Genus					-0.985407	-0.479584					0.622903			-0.415695													-0.423137																	-0.429871
seq_221_Lachnospiraceae NK4A136 group Genus									0.444554										0.486989						0.414346					0.414244
seq_222_splanchnicus	-0.566289	-0.416806				0.426663
seq_224_Blautia Genus					-0.518926			-0.441741		0.462741				-0.416264							0.414244										0.486989														-0.48901
seq_227_Tuzzerella Genus					-0.483043						0.47709											-0.446392					-0.464809		-0.469415																	-0.550163		-0.459183
seq_228_Bacteroides Genus			0.418763																0.459845						0.467554
seq_229_[Eubacterium] hallii group Genus					-0.767948						0.426131		0.496406
seq_232_Clostridia vadinBB60 group Order					0.457753		0.518508										0.544321									-0.437701									-0.611249								-0.415255
seq_233_[Eubacterium] xylanophilum group Genus			0.420465																0.444658						0.459115
seq_235_Monoglobus Genus				0.45647				0.506502					-0.455626											0.482977					0.494439										0.428626						0.545064
seq_238_Colidextribacter Genus																								0.488531				0.469415
seq_239_Lachnoclostridium Genus									0.444554										0.486989						0.414346					0.414244
seq_240_Oscillospiraceae Family	-0.501189																	0.459845				-0.546752	0.525658		-0.527476													-0.42272
seq_242_distasonis			0.417872
seq_243_Pediococcus Genus																												-0.428626
seq_244_inulinivorans					-0.650039																																									-0.555833
seq_245_Bacteroides Genus				-0.48901													-0.440513									0.444554											0.42041
seq_246_Erysipelotrichaceae Family
seq_247_aerofaciens					-0.760199
seq_248_UBA1819 Genus																						-0.418729				-0.440124		-0.542005										-0.429936
seq_249_Lachnospiraceae UCG-001 Genus	0.454067										-0.541043												-0.474532			0.470694		0.427206
seq_25_Anaeroplasma Genus			0.447964																0.423141
seq_251_Lachnoclostridium Genus	0.61298										-0.492324											0.489293								0.495356
seq_253_Blautia Genus
seq_254_Lachnospiraceae Family	-0.414244																0.420306			0.486989
seq_258_Lachnoclostridium Genus					-0.518926									-0.438492													-0.442618																	-0.48812		-0.443721			-0.466782
seq_259_Lachnospiraceae Family				0.503882		-0.44865																		0.428687					0.45753																0.462016
seq_26_Muribaculaceae Family						-0.490551
seq_260_Lachnospiraceae Family																																									-0.414346
seq_261_Butyricimonas Genus												-0.486989				-0.416387						-0.440513								-0.462741											-0.455781
seq_262_GCA-900066575 Genus	-0.435103	-0.442579																				-0.462016	0.479958		-0.471851
seq_263_Oscillospiraceae Family	-0.438492																						0.444554
seq_267_Lachnospiraceae UCG-002 Genus													-0.435376			-0.437833	0.430314									-0.428626															-0.457427
seq_268_Subdoligranulum Genus					-0.878702						0.452345																																			-0.426399
seq_269_Bacteroides Genus
seq_27_Lachnospiraceae UCG-006 Genus					0.64639						-0.587851																																			0.517058
seq_270_bacterium					-0.650039
seq_272_Lachnospiraceae Family																																		0.418011	-0.459139
seq_273_invisus					-0.518926				-0.466782																							-0.486989					-0.432537										-0.486989
seq_274_[Eubacterium] siraeum group Genus							0.452345											-0.476297											0.568682						-0.433291											0.420554		0.610426
seq_275_Intestinimonas Genus																												-0.437439														0.470694
seq_276_Lachnoclostridium Genus				-0.414282																																	0.425356			0.428626
seq_277_[Eubacterium] xylanophilum group Genus																																									-0.422431
seq_279_butyriciproducens															-0.419183
seq_28_Lachnospiraceae NK4A136 group Genus					0.494477	0.497956					-0.438628
seq_280_equolifaciens																			0.427038			0.500304	-0.479371					0.428085		0.475185	0.573571
seq_282_Bacteroidales Order											-0.721227			0.575018								0.454995
seq_283_Lachnospiraceae Family							0.581632															0.427627							0.542757		-0.479958				-0.646833								-0.487434					0.482949
seq_29_Lachnospiraceae NK4A136 group Genus			-0.516966		0.533637	0.503995
seq_290_Ureaplasma Genus					0.686105									0.418863																	-0.435012						0.622392
seq_293_Jeotgalicoccus Genus																													0.450054																	0.551469		0.523319
seq_295_Dorea Genus					-0.542081						0.418655		0.466502															-0.550233					-0.553223									0.520329
seq_299_catus					-0.985407	-0.451298					0.535927																																			-0.440259
seq_3_muciniphila										-0.621682												-0.62968	0.512381			-0.532642																						-0.648341
seq_30_distasonis
seq_301_Monoglobus Genus					-0.878702						0.43729																																			-0.498612
seq_302_Butyricicoccus Genus					-0.767948																										0.444074
seq_303_Clostridium sensu stricto 1 Genus					-0.650039										-0.464064
seq_305_Anaerovorax Genus									0.444554										0.486989						0.414346					0.414244
seq_307_[Clostridium] innocuum group Genus
seq_308_Lachnospiraceae Family													-0.421876			-0.437833	0.437064									-0.423564															-0.464178
seq_31_Citrobacter Genus															-0.466782									-0.434515																			-0.48901
seq_310_Lachnospiraceae Family
seq_312_Lachnospiraceae NK4A136 group Genus				0.457314
seq_314_intestinalis					-0.650039																															-0.536627
seq_315_Lachnoclostridium Genus	-0.462741																					-0.466782			-0.42041														-0.466782		-0.487109
seq_316_Lactonifactor Genus									0.438492										0.48901						0.422431					0.422327
seq_317_Lachnospiraceae NK4A136 group Genus									0.438492										0.48901						0.422431					0.422327
seq_318_Lachnospiraceae ND3007 group Genus					-0.767948																										0.442579
seq_32_merdae											-0.480457
seq_320_Lachnoclostridium Genus					-0.650039																															-0.536627
seq_323_Lachnospiraceae NK4A136 group Genus																	-0.438492	0.486989				-0.444554	0.440513		-0.442643													-0.444554										-0.462741
seq_326_Lachnospiraceae UCG-006 Genus
seq_327_Anaerotruncus Genus																								0.467939
seq_328_ilealis																								0.467939
seq_33_wadsworthia																						0.51828				0.55756																						0.438628
seq_330_Lachnospiraceae NK4A136 group Genus																																									-0.422431
seq_334_Lachnospiraceae Family							0.438492						-0.438492											0.445657					0.486989									0.440513
seq_337_formicigenerans					-0.650039																															-0.541689
seq_338_UCG-002 Genus					-0.878702	-0.55377					0.439343																										-0.53049
seq_341_paravirosa			0.496637														0.529915									-0.426236									-0.451207
seq_343_Lachnospiraceae Family																								-0.464661
seq_347_Lachnospiraceae Family																			0.514183			0.423369			0.475289																						0.438718
seq_348_Roseburia Genus					-0.518926		-0.414244				0.438492			-0.48901														-0.48901					-0.438492									0.486989
seq_349_Lachnospiraceae UCG-010 Genus																																																	-0.569326
seq_35_Bacteroides Genus	0.564576		-0.497037																			0.441396				0.574157
seq_350_DTU089 Genus			-0.458853																			-0.513543			-0.586885				-0.570474																		-0.490305	-0.504248
seq_351_Lachnospiraceae Family					-0.767948																										0.432112
seq_353_Lachnospiraceae Family												-0.486989				-0.416387						-0.440513								-0.462741											-0.455781
seq_36_Lachnospiraceae NK4A136 group Genus					0.64639						-0.577663																																			0.422861
seq_363_Oscillospiraceae Family			0.481146
seq_364_Oscillospiraceae Family																								0.467939
seq_365_Bifidobacterium Genus					-0.518926																																									-0.443721
seq_366_Lachnospiraceae Family
seq_368_colihominis										-0.453126																							-0.421756			0.507733
seq_369_Lachnospiraceae FCS020 group Genus																																									-0.414346
seq_370_[Ruminococcus] torques group Genus					-0.518926																																									-0.443721
seq_371_hominis					-0.767948																																									-0.656654
seq_372_Family XIII UCG-001 Genus			0.770733
seq_374_Oscillibacter Genus						0.435438					-0.701587
seq_375_subterminale
seq_376_distasonis			0.417872
seq_377_faecihominis			0.4374														0.46302
seq_378_Lachnospiraceae FCS020 group Genus													-0.421876			-0.437833	0.437064									-0.423564															-0.464178
seq_379_[Eubacterium] hallii group Genus					-0.767948						0.430617		0.49192
seq_381_Clostridia vadinBB60 group Order																																			-0.451738								-0.420306
seq_382_Candidatus Arthromitus Genus							0.444554						-0.444554											0.439579					0.48901									0.442534
seq_384_lenta																				-0.418061	-0.415816							-0.634667												-0.48091									-0.483155
seq_386_Ruminococcus Genus																-0.416387										-0.486989	0.441605			-0.416264
seq_39_Lachnospiraceae NK4A136 group Genus				0.429889	0.42123		0.478687				-0.496115										-0.428727			0.46182
seq_392_glucerasea					-0.650039						0.481783			-0.55772														-0.431157
seq_395_caecimuris																-0.496211						-0.480095	0.432001							-0.541689
seq_398_faecium	0.442534																												-0.438492
seq_4_Clostridium sensu stricto 1 Genus					0.42123							-0.48682
seq_40_Marvinbryantia Genus			0.504109		0.494477												0.608842										0.421121
seq_403_[Ruminococcus] torques group Genus					-0.519494																											-0.420151					-0.42175
seq_404_NK4A214 group Genus					-0.518926				-0.444554	-0.486989		-0.438492				-0.489331		-0.486989	-0.462741											-0.486989							-0.48812									-0.443721
seq_407_Clostridia UCG-014 Order							0.457314																						0.434532						-0.579801								-0.437064
seq_408_Streptococcus Genus					-0.767948																																									-0.656654
seq_409_shahii	0.560229										-0.432323																	0.424648													0.442664
seq_41_[Clostridium] innocuum group Genus			-0.583525		0.555049	0.553032					-0.483621			0.440919
seq_411_Oscillibacter Genus																																			-0.451738								-0.420306
seq_414_Streptococcus Genus					-0.650039																															-0.538314
seq_416_[Eubacterium] coprostanoligenes group Family					-0.767948	-0.483971																									0.445569
seq_418_Lachnospiraceae Family
seq_420_bartlettii					-0.518926				-0.462741																							-0.48901					-0.427484										-0.48901
seq_422_Lachnospiraceae Family									0.444554										0.486989						0.414346					0.414244
seq_425_Lachnospiraceae Family																																														0.416306
seq_426_Coriobacteriales Incertae Sedis Family			0.463609		-0.494587																																									-0.54017
seq_427_Peptococcaceae Family			0.414781								-0.442579			0.41417												-0.463511	0.457166
seq_429_Subdoligranulum Genus					-0.767948								0.470987
seq_43_Bacteroides Genus																										0.594873		0.467068
seq_430_Paludicola Genus																																				0.451509
seq_433_Incertae Sedis Genus											0.414282	-0.467439				-0.413721													-0.435376	-0.44972						0.49697								-0.462069		-0.440087
seq_434_Colidextribacter Genus		0.427565																						-0.489192																	0.4759	0.56815
seq_435_Lachnospiraceae Family
seq_437_Holdemania Genus									0.444554										0.486989						0.414346					0.414244
seq_44_Akkermansia Genus	0.50395																-0.419532					0.434881				0.621624						0.461741
seq_445_Lachnospiraceae UCG-001 Genus					-0.518926																																									-0.443721
seq_450_faecihominis					-0.767948								0.478463
seq_454_prausnitzii					-0.518926				-0.444554	-0.486989		-0.438492				-0.489331		-0.486989	-0.462741											-0.486989							-0.48812									-0.443721
seq_458_fastidiosa																								-0.484684	0.486163			-0.469415
seq_46_Lachnospiraceae Family																										0.457158		0.417748
seq_460_Lachnospiraceae Family				0.536776											0.444074																				0.578784								0.523319			0.416231	0.450054
seq_462_Lachnospiraceae Family											-0.437974
seq_463_filiformis																																																	-0.610041
seq_47_Lachnoclostridium Genus	0.498196								0.475782													0.428917	-0.556268			0.472726				0.471707
seq_470_Lachnoclostridium Genus					-0.767948		-0.41716			0.657887	0.629478																-0.430186				0.548738			-0.431471
seq_471_Christensenellaceae R-7 group Genus			0.440892																0.448033						0.472618
seq_473_Roseburia Genus					-0.650039										-0.461533																						-0.446455									-0.555833
seq_476_Lachnospiraceae Family																															-0.414244											0.416264
seq_479_Anaerotruncus Genus							0.542757						-0.429122				0.527805												0.562194		-0.441083				-0.607948								-0.545747
seq_484_Lachnoclostridium Genus					-0.650039							-0.435376				-0.479713														-0.477564																-0.555833
seq_486_[Ruminococcus] torques group Genus					-0.650039																																									-0.555833
seq_487_Lachnospiraceae UCG-009 Genus	-0.496126																	0.461533				-0.541689	0.527345		-0.525788													-0.417657
seq_488_Butyricicoccus Genus																										0.4175																		-0.605356
seq_489_faecihominis								0.462969								-0.416387		-0.440513								-0.462741		0.442534														-0.466782			0.420306
seq_49_bacterium					0.42123							-0.43686																							-0.475319			0.462421					-0.46823
seq_495_Christensenellaceae R-7 group Genus					-0.650039																															-0.536627
seq_497_Staphylococcus Genus																						0.469126													-0.51777
seq_499_Catenibacillus Genus			0.419306																																					0.515843
seq_5_Lachnoclostridium Genus			-0.520915		0.480043											0.424696
seq_50_Clostridium sensu stricto 1 Genus	-0.433689
seq_500_Lachnospiraceae UCG-002 Genus			0.442595																0.432845						0.464178
seq_504_UCG-005 Genus					-0.518926				-0.444554	-0.486989		-0.438492				-0.489331		-0.486989	-0.462741											-0.486989							-0.48812									-0.443721
seq_505_Streptococcus Genus					-0.518926				-0.438492	-0.48901		-0.444554				-0.489331		-0.48901	-0.466782											-0.48901							-0.48812									-0.443721
seq_506_Lachnospiraceae Family
seq_513_Lachnospiraceae Family						-0.490551
seq_514_UCG-002 Genus					-0.518926				-0.444554	-0.486989		-0.438492				-0.489331		-0.486989	-0.462741											-0.486989							-0.48812									-0.443721
seq_516_prausnitzii					-0.518926																																									-0.443721
seq_519_Aerococcus Genus	0.512853		-0.520362								-0.509862						-0.463511									0.503882
seq_52_Lachnoclostridium Genus																						-0.650411	0.53229		-0.530926				-0.439588									-0.475473			-0.44867						-0.45155	-0.49192
seq_520_CAG-56 Genus					-0.650039																																									-0.555833
seq_523_Clostridia Class																	-0.438492	0.486989				-0.444554	0.440513		-0.442643													-0.444554										-0.462741
seq_525_[Eubacterium] eligens group Genus					-0.518926																																									-0.443721
seq_529_massiliensis																																			-0.45477								-0.416264
seq_531_Colidextribacter Genus
seq_54_Bacteroides Genus																-0.464216								0.520012																					0.479034
seq_540_Colidextribacter Genus																			-0.430617									-0.473978					-0.509862
seq_543_Candidatus Stoquefichus Genus					-0.650039				-0.423564						-0.452251
seq_545_Lachnospiraceae Family						-0.490551
seq_547_Incertae Sedis Genus					-0.618294																			-0.469297							0.541043
seq_551_[Eubacterium] eligens group Genus					-0.518926																																									-0.443721
seq_553_Paraprevotella Genus		-0.462741											-0.48901																				0.486989
seq_556_Intestinimonas Genus																			0.426095											0.509626				0.488653
seq_558_Lachnospiraceae NK4A136 group Genus					-0.650039																																									-0.555833
seq_559_Family XIII AD3011 group Genus																			-0.422234					-0.615713																			-0.437974
seq_56_Lachnospiraceae UCG-001 Genus																																					0.428732			0.425251
seq_560_Incertae Sedis Genus									0.444554										0.486989						0.414346					0.414244
seq_561_intestini			0.448449		-0.518926																						-0.442618																			-0.443721			-0.486989
seq_567_Lachnoclostridium Genus																				0.494439
seq_568_Lachnoclostridium Genus					-0.518926				-0.438492	-0.48901		-0.444554				-0.489331		-0.48901	-0.466782											-0.48901							-0.48812									-0.443721
seq_57_Agathobacter Genus			0.457014		-0.542081																																									-0.543956
seq_571_Erysipelatoclostridium Genus					-0.650039																																									-0.555833
seq_572_Lachnoclostridium Genus					-0.767948					0.650411	0.620507																-0.430186				0.544252
seq_575_GCA-900066755 Genus		0.49491	0.475113																0.41417						0.542891		0.472155
seq_579_Butyricimonas Genus			0.43905								-0.486562
seq_58_Turicibacter Genus	0.525694												0.473253			0.488652	-0.474532					0.420811				0.468136						0.521857																	0.450229
seq_581_Marvinbryantia Genus					-0.518926																																									-0.443721
seq_59_caccae			0.683248
seq_598_Butyricicoccus Genus			0.442333		-0.518926																						-0.442618																			-0.443721			-0.48901
seq_6_Bacteroides Genus						0.435123					-0.528802											0.421646
seq_606_Family XIII AD3011 group Genus																								-0.468408				-0.500891						-0.438201
seq_608_Lachnoclostridium Genus			0.442333		-0.518926																						-0.442618																			-0.443721			-0.48901
seq_61_Lachnoclostridium Genus				0.464064
seq_610_Marvinbryantia Genus					-0.650039
seq_611_Haemophilus Genus					-0.650039			-0.509034		0.545064	0.499501			-0.469126					0.451408												0.495283												0.43622		-0.49697
seq_612_[Eubacterium] brachy group Genus																			0.426095											0.509626				0.488653
seq_62_Odoribacter Genus	-0.435921																					-0.693915	0.661752		-0.416178				-0.448239									-0.589212			-0.41789						-0.43729	-0.556364
seq_620_massiliensis																																		0.449831						0.546752				0.456583					0.495283
seq_622_hathewayi										-0.423141																								0.42175		0.415665
seq_626_hongkongensis
seq_63_Defluviitaleaceae UCG-011 Genus														0.421876													0.479594			-0.437907
seq_630_valericigenes
seq_64_Escherichia-Shigella Genus																							-0.460885																	-0.439748
seq_640_Incertae Sedis Genus					-0.518926										-0.48901																					-0.422327										-0.443721
seq_641_Faecalitalea Genus					-0.650039				-0.423564						-0.452251
seq_644_bacterium					-0.650039																																									-0.555833
seq_646_Desulfovibrio Genus					-0.518926			-0.441741		0.466782				-0.420306							0.422327										0.48901														-0.486989
seq_648_Lachnospira Genus					-0.518926																																									-0.443721
seq_65_plautii					0.540048						-0.618677												-0.419072																							0.423653
seq_651_Family XIII AD3011 group Genus					-0.767948						0.571166																-0.655022																	-0.625895		-0.471078			-0.49192
seq_659_Lachnospiraceae Family			0.442595																0.432845						0.464178
seq_66_Roseburia Genus									0.47171																									0.442716													0.413504
seq_661_[Clostridium] methylpentosum group Family					-0.650039						0.444658			-0.493595													-0.554451																	-0.531695		-0.555833			-0.580502
seq_664_Blautia Genus					-0.518926										-0.486989																					-0.414244										-0.443721
seq_665_Ruminococcaceae Family			0.418763																0.459845						0.467554
seq_668_pectinoschiza					-0.767948																										0.424636
seq_669_Gastranaerophilales Order								0.442752																										0.442643					0.442534						0.48901			0.420306
seq_67_Lachnospiraceae NK4A136 group Genus											-0.493405
seq_674_stercorihominis											0.546099																			-0.444818														-0.450746
seq_678_Lachnospiraceae Family			0.432381																0.431157						0.457427
seq_683_[Eubacterium] nodatum group Genus
seq_69_Lachnospiraceae Family																	0.474244																															0.511198
seq_692_Bacteroidales Order
seq_694_Lachnoclostridium Genus					-0.650039						0.44297			-0.480095													-0.554451																	-0.5241		-0.555833			-0.585564
seq_697_suicloacalis	0.578641										-0.467997						-0.497901									0.485939				0.423141																			0.521824
seq_699_Ruminococcaceae Family									0.438492										0.48901						0.422431					0.422327
seq_7_uniformis	0.579215	0.41487																				0.565186	-0.64335			0.469986		0.459965		0.537127																		0.430904
seq_70_Lachnospiraceae NK4A136 group Genus				0.553223			0.41716	0.507123										-0.45155						0.613052					0.602565										0.465006						0.556214			0.429122
seq_700_Anaerofilum Genus
seq_703_DTU089 Genus					-0.650039										-0.464064
seq_704_Hydrogenoanaerobacterium Family			0.423831								-0.439588			0.415665												-0.460521	0.469157
seq_706_Candidatus Soleaferrea Genus																											-0.538856																						-0.520329
seq_71_faecium																												-0.565688														0.616011						0.426843
seq_72_Roseburia Genus					0.494477
seq_720_Lachnospiraceae Family					-0.518926																																									-0.443721
seq_722_Tuzzerella Genus																																			-0.451738								-0.420306
seq_73_CAG-352 Genus					-0.518926				-0.466782																							-0.486989					-0.432537										-0.486989
seq_732_Gemella Genus					-0.650039										-0.459845																						-0.432108									-0.555833
seq_734_Cetobacterium Genus															0.442534	0.421453						0.416264																				0.444554				0.440675		0.422327
seq_74_Faecalibacterium Genus					-0.767948																																									-0.513903
seq_746_Lachnospiraceae Family					-0.650039																															-0.541689
seq_747_odontolyticus					-0.767948	-0.483971			-0.500891						-0.459026															-0.435103							-0.512232									-0.485353
seq_75_Lachnospiraceae FCS020 group Genus																											0.415271
seq_750_Christensenellaceae R-7 group Genus																-0.422466										-0.48901	0.443631			-0.420306
seq_757_Eubacterium Genus		-0.466782											-0.486989																				0.48901
seq_76_nordii			0.418763																0.459845						0.467554
seq_760_Faecalitalea Genus														-0.540002
seq_766_Lachnospiraceae Family																-0.416387										-0.486989	0.441605			-0.416264
seq_77_Oscillospiraceae Family					0.42123								-0.434536													-0.450802								0.501467
seq_770_Erysipelatoclostridium Genus					-0.518926										-0.486989																					-0.414244										-0.443721
seq_772_Gordonibacter Genus																																		0.443079						0.540002				0.436328					0.475033
seq_777_Bifidobacterium Genus					-0.518926		-0.422327				0.444554			-0.486989														-0.486989					-0.444554									0.48901
seq_779_Colidextribacter Genus			0.539147
seq_78_massiliensis			0.484163
seq_780_Intestinimonas Genus																																															0.438492
seq_781_Paludicola Genus			0.432381																0.431157						0.457427
seq_789_Butyricicoccus Genus				0.466782																																										0.489413
seq_79_Lachnospiraceae Family																										-0.433868								0.423366
seq_791_Frisingicoccus Genus					-0.650039																																									-0.555833
seq_795_Clostridia Class									0.444554										0.486989						0.414346					0.414244
seq_796_massiliensis
seq_798_Lachnospiraceae FE2018 group Genus																-0.416387										-0.486989	0.441605			-0.416264
seq_8_Lactobacillus Genus					-0.650039				-0.540002										-0.520595		-0.437064									-0.538314		-0.448033					-0.558702										-0.525658
seq_80_faecis					-0.93422	-0.466253	-0.43715				0.471103
seq_81_Oscillospiraceae Family					0.531579
seq_816_NK4A214 group Genus			0.442333		-0.518926																						-0.442618																			-0.443721			-0.48901
seq_819_Lachnospiraceae UCG-004 Genus			0.442333		-0.518926																						-0.442618																			-0.443721			-0.48901
seq_82_saccharivorans					-0.767948								0.470987
seq_821_GCA-900066575 Genus					-0.518926										-0.48901																					-0.422327										-0.443721
seq_823_Alistipes Genus																											-0.427997
seq_83_putredinis	0.487177										-0.502643											0.683595	-0.425829									0.435624
seq_833_Oxalobacter Genus									0.444554										0.486989						0.414346					0.414244
seq_837_Anaerofilum Genus
seq_839_Intestinimonas Genus					-0.518926				-0.444554	-0.486989		-0.438492				-0.489331		-0.486989	-0.462741											-0.486989							-0.48812									-0.443721
seq_84_clarus																												-0.425251															-0.419345
seq_843_Catabacter Genus																-0.422466					-0.420306									-0.444554
seq_848_isoflavoniconvertens			0.442333		-0.518926																						-0.442618																			-0.443721			-0.48901
seq_85_intestinalis																												-0.542648												-0.462615									-0.498387
seq_856_Lactococcus Genus					-0.650039				-0.540002										-0.520595		-0.437064									-0.538314		-0.448033					-0.558702										-0.525658
seq_86_hydrogenotrophica			0.551636	0.590897																				0.493916
seq_866_Granulicatella Genus					-0.518926										-0.486989																					-0.414244										-0.443721
seq_87_distasonis
seq_870_Family XIII AD3011 group Genus																																		0.439704						0.548439				0.448143					0.48347
seq_874_pectinoschiza					-0.650039				-0.423564						-0.452251
seq_876_indistinctus																0.419643						0.457314			0.414385																	0.428626
seq_878_Lachnospiraceae UCG-010 Genus					-0.518926																			-0.488196												-0.486989
seq_879_Lachnoclostridium Genus					-0.518926									-0.444554													-0.442618																	-0.48812		-0.443721			-0.462741
seq_88_Lachnoclostridium Genus			-0.709133	-0.425894	0.469276	0.588288					-0.462971														-0.433015																						-0.430904
seq_89_Parasutterella Genus																																			-0.45477								-0.416264
seq_890_Firmicutes Phylum																							0.45647			-0.444658	0.523578
seq_9_Bacteroides Genus														0.453414											0.522565										-0.452684
seq_90_Bacteroides Genus					-0.521686						0.500113			-0.418253													-0.519304																						-0.502671
seq_907_Incertae Sedis Genus																													-0.414244							0.414244						0.440513
seq_91_Oscillibacter Genus	0.518834																											0.581632
seq_914_Clostridia Class															-0.527345									-0.511736											-0.447721								-0.56447
seq_92_Lachnoclostridium Genus
seq_927_tanakaei															0.442534	0.421453						0.416264																				0.444554				0.440675		0.422327
seq_935_Papillibacter Genus			0.444372																				0.414244
seq_94_Enterococcus Genus	0.486867														-0.463828									-0.420911																			-0.478379
seq_946_Angelakisella Genus					-0.518926				-0.444554	-0.486989		-0.438492				-0.489331		-0.486989	-0.462741											-0.486989							-0.48812									-0.443721
seq_95_Lachnoclostridium Genus			0.529424		0.494477												0.429899
seq_959_Streptococcus Genus																											0.423374
seq_96_ramosum	-0.551174																					-0.421785						-0.522647										-0.491064										-0.422804
seq_960_moorei					-0.518926									-0.438492													-0.442618																	-0.48812		-0.443721			-0.466782
seq_97_longoviformis																-0.491135						-0.48347	0.435376							-0.540002
seq_974_Butyricicoccus Genus					-0.518926			-0.441741		0.466782				-0.420306							0.422327										0.48901														-0.486989
seq_98_Lachnospiraceae Family					0.60744																														-0.499673													0.452636
seq_987_Lactonifactor Genus					-0.518926										-0.486989																					-0.414244										-0.443721
seq_99_distasonis				0.428626		-0.448679																												0.438016
seq_992_Anaerofustis Genus					-0.518926										-0.486989																					-0.414244										-0.443721
[truncated: 824 more columns]

## Sheet: metabolites_ corr_w_ASV p<0.05
ASV	taxonomy	enriched in	correlation	metabolites
seq_103_Methanobrevibacter Genus	Archaea_Euryarchaeota_Methanobacteria_Methanobacteriales_Methanobacteriaceae_Methanobrevibacter	FAST	positive	taurolithocholate 3-sulfate	taurodeoxycholic acid 3-sulfate	bilirubin degradation product, C17H18N2O4 (2)**	alpha-tocotrienol	X-25534	bilirubin degradation product, C17H18N2O4 (3)**	X-14454	X-15853	X-25433	X-15854	X-14383	X-25490	bilirubin	X-17969	X-25950	X-25485	X-17960	X-25709	gamma-tocotrienol	tyramine	X-14392	X-25701	X-25564	X-24729	2-hydroxyadipate
seq_10_caccae	Bacteria_Firmicutes_Clostridia_Lachnospirales_Lachnospiraceae_Anaerostipes_caccae	FAST	positive	3-amino-2-piperidone	1-methylguanidine	X-24359	cyclo(his-pro)	X-12680	sebacate (C10-DC)	hexanoyltaurine	methylmalonate (MMA)	X-26103
seq_13_Blautia Genus	Bacteria_Firmicutes_Clostridia_Lachnospirales_Lachnospiraceae_Blautia	FAST	positive	X-26103	cyclo(his-pro)	X-24359	2,3-dimethylsuccinate	tauroursodeoxycholate	palmitoylcholine	hexanoyltaurine	X-23277	taurochenodeoxycholate	catechol sulfate	3,4-dihydroxybutyrate	coprostanol	X-25493	kynurenate	hippurate	xanthurenate	X-23732	dihydroferulic acid sulfate	3-amino-2-piperidone	formononetin	3-hydroxyadipate	lysylleucine	sebacate (C10-DC)	methylmalonate (MMA)	3-sulfo-alanine	2-amino-4-cyanobutanoate	X-23278	cysteine sulfinic acid	X-26099	allantoin	3-methylglutarate/2-methylglutarate	valerylglycine (C5)
seq_65_plautii	Bacteria_Firmicutes_Clostridia_Oscillospirales_Oscillospiraceae_Flavonifractor_plautii	FAST	positive	guanidinoacetate	dihydroferulic acid sulfate	1-palmitoyl-digalactosylglycerol (16:0)*	hippurate	palmitoleoylcarnitine (C16:1)*	2-hydroxysebacate	5-methylthioadenosine (MTA)	octadecadienedioate (C18:2-DC)*	O-sulfo-tyrosine	N-methyl-GABA	X-18345	isohyodeoxycholate	3-hydroxysebacate	3-hydroxypalmitate	6-oxolithocholate	acetylcarnitine (C2)	equol	carboxymethylproline	2-aminoadipate	3-hydroxybutyrate (BHBA)	3-hydroxydecanoate	2,4,6-trihydroxybenzoate	ferulate	naringenin	3-(3-hydroxyphenyl)propionate sulfate	1-palmitoyl-GPS (16:0)*	diosmetin	1-deoxysphinganine (m18:0)	S-carboxymethyl-cysteine	enterolactone sulfate	1-pentadecanoylglycerol (15:0)	X-19746	1-palmityl-GPC (O-16:0)	pheophorbide A	1-methyl-5-imidazoleacetate	glycerophosphoethanolamine
seq_141_Oscillospiraceae Family	Bacteria_Firmicutes_Clostridia_Oscillospirales_Oscillospiraceae	FAST	positive	ala-ile-ala	2-palmitoyl-GPC (16:0)*	diaminopimelate	2'-deoxyguanosine 5'-monophosphate (dGMP)	tetradecanedioate (C14)	dodecanedioate (C12)	sarcosine	L-urobilin	3-dehydrocholate	X-25508	2-hydroxyadipate	1-palmitoyl-GPE (16:0)	dCMP	X-15854	taurolithocholate 3-sulfate	3-phenylpropionate (hydrocinnamate)	biotin	3-(3-hydroxyphenyl)propionate	1-palmitoyl-2-linoleoyl-GPE (16:0/18:2)	lactate
seq_25_Anaeroplasma Genus	Bacteria_Firmicutes_Bacilli_Acholeplasmatales_Acholeplasmataceae_Anaeroplasma_Anaeroplasma Genus	FAST	positive	deoxycarnitine	N-methylalanine	hexadecasphinganine (d16:0)*	X-25947	heptadecasphingosine (d17:1)	1-methyl-5-imidazoleacetate	dimethylglycine	saccharopine	2'-deoxyguanosine	sphinganine	X-25946	X-25518	thioproline	1-deoxysphinganine (m18:0)	lactobacillic acid	equol	fucose	X-25502	thymidine	3-phenylpropionate (hydrocinnamate)	enterolactone	3-ketosphinganine	X-17852	thymine	fructose	2'-deoxyinosine
seq_41_[Clostridium] innocuum group Genus	Bacteria_Firmicutes_Bacilli_Erysipelotrichales_Erysipelotrichaceae_[Clostridium] innocuum group	FAST	positive	X-12828	1-methylguanidine	dihydroferulic acid sulfate	hexanoyltaurine	pyridoxate	tauroursodeoxycholate	formononetin	taurochenodeoxycholate	hippurate	xanthurenate	X-23482	lysylleucine	heptadecatrienoate (17:3)*	anthranilate	daidzein	indole-3-carboxylate	3,4-dihydroxybutyrate	pimelate (C7-DC)	X-24853	3-hydroxyadipate	X-19232	azelate (C9-DC)
seq_15_Alistipes Genus	Bacteria_Bacteroidota_Bacteroidia_Bacteroidales_Rikenellaceae_Alistipes_Alistipes Genus	FAST	positive	X-25709	2-isopropylmalate	2,4-dihydroxybutyrate	allo-threonine	2-hydroxy-4-(methylthio)butanoic acid	valerate (5:0)	hexanoyltaurine	3-sulfo-alanine	X-18167	gamma-glutamyl-epsilon-lysine	sebacate (C10-DC)	N-acetyltaurine	3-methylglutarate/2-methylglutarate	methylsuccinate	X-26099	coprostanol	3,4-dihydroxybutyrate	5-oxoproline	5-hydroxyhexanoate	imidazole lactate	urate	X-26103	X-24359	2-hydroxy-3-methylvalerate
seq_247_aerofaciens	Bacteria_Actinobacteriota_Coriobacteriia_Coriobacteriales_Coriobacteriaceae_Collinsella_aerofaciens	FAST	positive	taurolithocholate 3-sulfate	ala-ile-ala	taurodeoxycholic acid 3-sulfate	X-25708	X-14454	X-25533	X-24729	X-15854	2-hydroxyadipate	ala-leu-ala	leucylglutamine*	X-25487	X-25701	X-17960	X-25485	X-25670	X-18278	X-25477	X-25690	X-14383	X-25076	X-25490	X-25564	X-25433	X-14392	1-palmitoyl-2-linoleoyl-GPE (16:0/18:2)	X-15853	X-25709	X-25534	X-25536	X-20172	X-16391	X-14254	X-25532	X-25716	X-25710	X-25535	X-19931	X-17969	X-25717	val-val-ala	X-22062	X-25676	indoleacetate	dCMP	lactate
seq_64_Escherichia-Shigella Genus	Bacteria_Proteobacteria_Gammaproteobacteria_Enterobacterales_Enterobacteriaceae_Escherichia-Shigella	FAST	positive	indole-3-carboxylate	N-acetylcysteine	N-methyl-GABA	palmitoyl dihydrosphingomyelin (d18:0/16:0)*	3-hydroxymargaroylglycine	tryptophylglycine	3-hydroxysebacate	1-palmitoyl-digalactosylglycerol (16:0)*	glyco-beta-muricholate**	leucylglycine	X-25326	hexadecanedioate (C16)	3-hydroxybutyrate (BHBA)	2-aminoadipate	N-palmitoyl-sphinganine (d18:0/16:0)	3-hydroxymargarate	X-13007	stearoyl sphingomyelin (d18:1/18:0)
seq_3_muciniphila	Bacteria_Verrucomicrobiota_Verrucomicrobiae_Verrucomicrobiales_Akkermansiaceae_Akkermansia_muciniphila	FAST	positive	urate	coprostanol	lactate	N-acetylcitrulline	saccharopine	imidazole lactate	X-23732	N-acetyltaurine	X-23060	N-acetyl-aspartyl-glutamate (NAAG)
seq_488_Butyricicoccus Genus	Bacteria_Firmicutes_Clostridia_Oscillospirales_Butyricicoccaceae_Butyricicoccus_Butyricicoccus Genus	SLOW	positive	4-acetamidobutanoate	3-methylglutaconate	X-25949	lithocholic acid sulfate (2)	fructosyllysine	maltose	sphingadienine	X-25957	N-delta-acetylornithine	N-carbamoylalanine	X-15461	3-(4-hydroxyphenyl)propionate	3-hydroxysuberate	glycerophosphorylcholine (GPC)	dehydrophytosphingosine*	kynurenate
seq_49_bacterium	Bacteria_Firmicutes_Clostridia_Lachnospirales_Lachnospiraceae_Lachnospiraceae NK4A136 group_bacterium	SLOW	positive	X-15461	inosine	N-stearoyl-sphinganine (d18:0/18:0)*	1-pentadecanoylglycerol (15:0)	X-23105	6-oxolithocholate	isohyodeoxycholate	pseudouridine	5-aminovalerate	glutarate (C5-DC)	N-palmitoyl-phytosphingosine (t18:0/16:0)	pterin	5-methyluridine (ribothymidine)	3-hydroxystearate	N-stearoylserine*	eicosapentaenoate (EPA; 20:5n3)	linolenoyl-linolenoyl-glycerol (18:3/18:3) [1]*	X-11787	dihydroferulic acid sulfate	3-hydroxypalmitate	hippurate
seq_572_Lachnoclostridium Genus	Bacteria_Firmicutes_Clostridia_Lachnospirales_Lachnospiraceae_Lachnoclostridium	SLOW	positive	taurodeoxycholic acid 3-sulfate	taurolithocholate 3-sulfate	X-22142	glutaminylleucine	X-26265	X-22099	X-13007	X-19751	X-24729	glucose	3-methylhistidine	N-acetyl-cadaverine	pyrraline	N-carbamoylputrescine	X-25247	ala-leu-ala	anserine	X-20172	2-oxindole-3-acetate	1-methyl-5-imidazolelactate	7-methylguanine	bilirubin degradation product, C16H18N2O5 (3)**	X-25433	X-25487	X-25485	N-methylproline	X-23644	N-palmitoyl-sphingosine (d18:1/16:0)	X-25537	N-acetylputrescine	X-25710	1-palmitoyl-GPI (16:0)	X-17969	X-16391	protoporphyrin IX	X-25533	X-25716	X-25676	X-25701	piperidine	glycylleucine	X-25708	gluconate	X-13507	X-25670	N-acetylhomocitrulline
seq_109_massiliensis	Bacteria_Firmicutes_Clostridia_Lachnospirales_Lachnospiraceae_Blautia_massiliensis	SLOW	positive	taurolithocholate 3-sulfate	taurodeoxycholic acid 3-sulfate	X-17960	X-25564	X-25433	X-25490	X-15854	ala-ile-ala	X-25701	X-25533	X-14383	X-14454	X-17969	X-14392	X-16391	X-25670	X-25716	X-25534	X-25485	X-24729	X-19931	ala-leu-ala	X-25477	X-25487	leucylglutamine*	X-25708	X-25709	X-15853	X-25076	X-20172	phenylalanylalanine	X-25537	spermidine	X-25717	X-14254	X-14056	hydantoin-5-propionate	X-25690	2-hydroxyadipate	anserine	X-18278	sulfate*	X-25676	X-25536	X-25710	val-val-ala
seq_349_Lachnospiraceae UCG-010 Genus	Bacteria_Firmicutes_Clostridia_Lachnospirales_Lachnospiraceae_Lachnospiraceae UCG-010_Lachnospiraceae UCG-010 Genus	SLOW	positive	dodecanedioate (C12)	1-palmitoyl-GPC (16:0)	hexadecanedioate (C16)	12-ketolithocholate	X-23752	indolepropionate	octadecenedioate (C18:1-DC)	carboxymethylproline	lithocholate	X-25247	isovalerylglycine	X-15956	undecanedioate (C11-DC)	L-urobilin	cytosine	X-17438	beta-guanidinopropanoate
seq_1_Turicibacter Genus	Bacteria_Firmicutes_Bacilli_Erysipelotrichales_Erysipelotrichaceae_Turicibacter	SLOW	positive	dihydroferulic acid sulfate	hippurate	enterolactone sulfate	glutamate, gamma-methyl ester	heptadecatrienoate (17:3)*	gamma-glutamylisoleucine*	gamma-glutamylglutamine	O-sulfo-tyrosine	sphingomyelin (d18:1/14:0, d16:1/16:0)*	N-acetylproline	tauroursodeoxycholate	X-11787	2-aminoadipate	X-25785	vanilloylglycine	7,12-diketolithocholate	heptanoate (7:0)	X-18345	hexanoyltaurine	gamma-glutamylalanine	S-carboxymethyl-cysteine	1-palmitoyl-digalactosylglycerol (16:0)*	X-25010	palmitoleoylcarnitine (C16:1)*	6-oxopiperidine-2-carboxylate	1-pentadecanoylglycerol (15:0)	2,4,6-trihydroxybenzoate	N-methyl-GABA	N-acetylaspartate (NAA)	1-palmityl-GPC (O-16:0)	1-(1-enyl-oleoyl)-GPE (P-18:1)*	1,2-dipalmitoyl-GPC (16:0/16:0)	caproate (6:0)	guanidinoacetate	oleanolate	allo-threonine	X-23581	picolinate	3-formylindole	hexadecadienoate (16:2n6)	tetradecadienoate (14:2)*
seq_2_vulgatus	Bacteria_Bacteroidota_Bacteroidia_Bacteroidales_Bacteroidaceae_Bacteroides_vulgatus	SLOW	positive	pterin	2-palmitoyl-GPC (16:0)*	arachidonate (20:4n6)	docosapentaenoate (DPA; 22:5n3)	X-17910	1-(1-enyl-palmitoyl)-GPE (P-16:0)*	hexadecasphinganine (d16:0)*	2-stearoyl-GPE (18:0)*	enterolactone	dimethylglycine	1-margaroyl-GPE (17:0)*	sphinganine	homoserine	X-25518	N-acetylhistidine	docosahexaenoate (DHA; 22:6n3)	X-22062	X-17877	cytosine	adrenate (22:4n6)	1-deoxysphinganine (m18:0)	choline	N-methylalanine	phytosphingosine	ornithine	X-25947	3beta-hydroxy-5-cholestenoate	N6-methyllysine	hyocholate	1-(1-enyl-stearoyl)-GPE (P-18:0)*	nicotinate ribonucleoside	X-17852	2-oleoyl-GPC (18:1)*	1-palmitoyl-GPE (16:0)	1-(1-enyl-oleoyl)-GPE (P-18:1)*	X-15608	lysine	sarcosine	N6-acetyllysine	heptadecasphingosine (d17:1)	octadecenedioate (C18:1-DC)	X-26126	X-21353	hexadecadienoate (16:2n6)	dihomolinoleate (20:2n6)	X-25681
seq_6_Bacteroides Genus	Bacteria_Bacteroidota_Bacteroidia_Bacteroidales_Bacteroidaceae_Bacteroides_Bacteroides Genus	SLOW	positive	guanidinoacetate	octadecadienedioate (C18:2-DC)*	1-deoxysphinganine (m18:0)	X-25521	1-palmitoyl-GPS (16:0)*	2-hydroxysebacate	3-(3-hydroxyphenyl)propionate sulfate	isohyodeoxycholate	X-25493	6-oxolithocholate	(12 or 13)-methylmyristate (a15:0 or i15:0)	1-palmitoyl-2-palmitoleoyl-GPC (16:0/16:1)*	X-19746	3-hydroxymargaroylglycine	X-18345	1-palmitoyl-digalactosylglycerol (16:0)*	thioproline	palmitoleoylcarnitine (C16:1)*	anthranilate	3-hydroxysebacate	sphinganine	hexadecasphinganine (d16:0)*	equol	xanthurenate	3-hydroxypalmitate	N-palmitoyl-sphinganine (d18:0/16:0)	dihydroferulic acid sulfate	glycerol 3-phosphate	myristoylcarnitine (C14)	enterodiol	oleoylcarnitine (C18:1)
seq_11_Bacteroides Genus	Bacteria_Bacteroidota_Bacteroidia_Bacteroidales_Bacteroidaceae_Bacteroides_Bacteroides Genus	SLOW	positive	X-25949	lithocholic acid sulfate (2)	X-15461	N6-methyllysine	2-palmitoyl-GPC (16:0)*	X-26126	enterodiol	3-methylglutaconate	pterin	3-hydroxysuberate	N6-carboxymethyllysine
seq_30_distasonis	Bacteria_Bacteroidota_Bacteroidia_Bacteroidales_Tannerellaceae_Parabacteroides_distasonis	SLOW	positive	octadecenedioate (C18:1-DC)	octadecadienedioate (C18:2-DC)*	X-25945	3-(3-hydroxyphenyl)propionate	X-26125	X-25502	hexadecanedioate (C16)	X-23456	phosphocholine	3,5-dihydroxyphenylpropionate	gamma-glutamylglutamine	cytosine	aconitate [cis or trans]	enterodiol	pheophorbide A
seq_32_merdae	Bacteria_Bacteroidota_Bacteroidia_Bacteroidales_Tannerellaceae_Parabacteroides_merdae	SLOW	positive	octadecadienedioate (C18:2-DC)*	(12 or 13)-methylmyristate (a15:0 or i15:0)	1-deoxysphinganine (m18:0)	lithocholate	carboxymethylproline	6-oxolithocholate	hexadecanedioate (C16)	isohyodeoxycholate	guanidinoacetate	3-dehydrodeoxycholate	equol	octadecenedioate (C18:1-DC)	1-pentadecanoylglycerol (15:0)	1-palmitoyl-GPS (16:0)*	sphinganine	12-ketolithocholate	enterodiol	3-hydroxysuberate	cytosine	3-hydroxymargaroylglycine	pterin	dehydrolithocholate
seq_83_putredinis	Bacteria_Bacteroidota_Bacteroidia_Bacteroidales_Rikenellaceae_Alistipes_putredinis	SLOW	positive	glycerol 3-phosphate	alpha-hydroxyisovalerate	glycerophosphoethanolamine	fructosyllysine	1-methylnicotinamide	acetylcarnitine (C2)	dehydrolithocholate	X-15608	nicotinate	3-dehydrodeoxycholate	mevalonate	carnitine	N1,N12-diacetylspermine	isohyodeoxycholate	X-15461	dihydroorotate	X-18278	X-25535	X-17919	X-25532	isoleucylglycine	NAD+	6-oxolithocholate	succinylcarnitine (C4-DC)	N2-acetyl,N6-methyllysine	N-acetyl-3-methylhistidine*	myristoylcarnitine (C14)	tartarate	hypoxanthine	diacetylspermidine*	2,3-dihydroxyisovalerate	hydroxyproline	phenol sulfate	1-pentadecanoylglycerol (15:0)	X-25521
seq_111_finegoldii	Bacteria_Bacteroidota_Bacteroidia_Bacteroidales_Rikenellaceae_Alistipes_finegoldii	SLOW	positive	guanidinoacetate	xanthurenate	equol	heptadecatrienoate (17:3)*	X-23048	taurochenodeoxycholate	octadecadienedioate (C18:2-DC)*	hippurate	dodecanedioate (C12)	dodecenedioate (C12:1-DC)*	dihydroferulic acid sulfate	nicotinamide	lysylleucine	palmitoylcholine	azelate (C9-DC)	valerylglycine (C5)	tauroursodeoxycholate	cyclo(his-pro)	1-palmityl-GPC (O-16:0)	X-26103	2,4,6-trihydroxybenzoate	1-palmitoyl-GPS (16:0)*	branched chain 14:0 dicarboxylic acid**	gentisate	linolenate (18:3n3 or 3n6)	1-myristoylglycerol (14:0)	hexanoyltaurine
seq_222_splanchnicus	Bacteria_Bacteroidota_Bacteroidia_Bacteroidales_Marinifilaceae_Odoribacter_splanchnicus	SLOW	positive	cyclo(his-pro)	valerylglycine (C5)	X-18059	3-amino-2-piperidone	X-19232	X-26266	X-23469	1-methylguanidine	xanthurenate	N-acetylhistamine
seq_33_wadsworthia	Bacteria_Desulfobacterota_Desulfovibrionia_Desulfovibrionales_Desulfovibrionaceae_Bilophila_wadsworthia	SLOW	positive	3-hydroxysuberate	2-hydroxysebacate	dehydrophytosphingosine*	glycerophosphoethanolamine	N-palmitoyl-phytosphingosine (t18:0/16:0)	fructosyllysine	6-oxolithocholate	sphingadienine	3-hydroxysebacate	1-pentadecanoylglycerol (15:0)	N-stearoyl-sphinganine (d18:0/18:0)*	isohyodeoxycholate	3-hydroxypalmitate	N2-acetyl,N6-methyllysine	glycerophosphorylcholine (GPC)	4-acetamidobutanoate	X-15461	nicotinate	histamine	glycerol 3-phosphate	2-methylcitrate/homocitrate	eicosapentaenoate (EPA; 20:5n3)	myristoylcarnitine (C14)	1-methylnicotinamide	N-acetylasparagine	X-25957	7-ketodeoxycholate	linoleoylcarnitine (C18:2)*	palmitoleoylcarnitine (C16:1)*	cytidine 2',3'-cyclic monophosphate	1-linoleoyl-GPC (18:2)	acetylcarnitine (C2)	1-oleoyl-GPC (18:1)	X-23105	X-25521	hyocholate	guanidinoacetate	1-palmitoyl-digalactosylglycerol (16:0)*	3-dehydrodeoxycholate	docosahexaenoate (DHA; 22:6n3)	10-heptadecenoate (17:1n7)	nicotinate ribonucleoside	N-acetylthreonine	4-imidazoleacetate	N6-methyllysine	X-23048
seq_44_Akkermansia Genus	Bacteria_Verrucomicrobiota_Verrucomicrobiae_Verrucomicrobiales_Akkermansiaceae_Akkermansia_Akkermansia Genus	SLOW	positive	fructosyllysine	sphingadienine	N2-acetyl,N6-methyllysine	4-methylcatechol sulfate	2-methylcitrate/homocitrate	phenol sulfate	mevalonate	glycerophosphorylcholine (GPC)	N-formylmethionine	succinylcarnitine (C4-DC)	nicotinate	1-methylnicotinamide	myristoylcarnitine (C14)	N-acetylserine	dihydrocaffeate sulfate (2)	N-acetylasparagine	palmitoleoylcarnitine (C16:1)*	argininate*	N-acetylmethionine	glycerophosphoethanolamine	2,4-dihydroxybutyrate	N-acetylphenylalanine	N-acetylalanine	diacetylspermidine*	N-acetyltyrosine	1-stearoyl-2-oleoyl-GPC (18:0/18:1)	2,3-dihydroxyisovalerate	X-19921	N-acetylthreonine	acetylcarnitine (C2)	X-25957	N2-acetyllysine	1-oleoyl-GPC (18:1)	carnitine	dehydrophytosphingosine*	X-25109	N-acetylleucine	alpha-hydroxyisovalerate	carboxyethyl-GABA	linoleoylcarnitine (C18:2)*	X-19746	2-hydroxysebacate	histamine	dimethylarginine (ADMA + SDMA)	cytidine 2',3'-cyclic monophosphate	glycerol
seq_103_Methanobrevibacter Genus	Archaea_Euryarchaeota_Methanobacteria_Methanobacteriales_Methanobacteriaceae_Methanobrevibacter	FAST	negative	1,1-kestotetraose	3-hydroxyadipate	X-26103	X-25854	N-stearoylserine*	cysteine s-sulfate	thymidine	X-23278	X-12100	1-methylhypoxanthine	N-oleoylserine	ectoine	O-sulfo-tyrosine	X-25945	1-palmitoyl-GPC (16:0)	palmitoleoylcarnitine (C16:1)*	1-palmitoyl-2-palmitoleoyl-GPC (16:0/16:1)*	carboxymethylproline	X-26127	agmatine	N6,N6,N6-trimethyllysine	1,2-dilinoleoyl-digalactosylglycerol (18:2/18:2)*	X-25955	5-hydroxyindoleacetate	malate	N-alpha-acetylornithine	N-acetylproline	formononetin	2-oleoyl-GPG (18:1)*	diosmetin	xanthurenate	X-25109	3-hydroxydecanoate	catechol sulfate	1,2-dilinoleoyl-galactosylglycerol (18:2/18:2)*	glycerophosphoglycerol	methionine sulfone	lysylleucine	pheophorbide A	2-oleoylglycerol (18:1)	1-palmityl-GPC (O-16:0)	1-palmitoyl-2-linoleoyl-galactosylglycerol (16:0/18:2)*	syringic acid	palmitoyl-linolenoyl-glycerol (16:0/18:3) [2]*	methionine sulfoxide	2,6-dihydroxybenzoic acid
seq_10_caccae	Bacteria_Firmicutes_Clostridia_Lachnospirales_Lachnospiraceae_Anaerostipes_caccae	FAST	negative	1-margaroyl-GPE (17:0)*	eicosenoylcarnitine (C20:1)*	docosahexaenoate (DHA; 22:6n3)	eicosapentaenoate (EPA; 20:5n3)	campesterol	X-25676	cis-urocanate	X-26265	X-12100	sphingosine	tyrosine	1-oleoyl-GPC (18:1)	myristoylcarnitine (C14)	orotate	1-(1-enyl-palmitoyl)-GPE (P-16:0)*	citrulline	carnitine	N-methylalanine	pyridoxal	protoporphyrin IX	fucose	pyridoxamine	4-hydroxyphenylacetate	1-palmitoyl-2-linoleoyl-galactosylglycerol (16:0/18:2)*	X-25701	1-stearoyl-2-oleoyl-GPC (18:0/18:1)	N-alpha-acetylornithine	pantothenate (Vitamin B5)	X-25485	xylose	X-25716	N-acetylneuraminate	cystine	AMP	acetylcarnitine (C2)	1-palmitoyl-2-linoleoyl-GPE (16:0/18:2)	leucine	phytosphingosine	tryptophan	cysteine	X-25758	2'-deoxyguanosine 5'-monophosphate (dGMP)	X-14454	beta-sitosterol	N-palmitoylglycine	dCMP
seq_13_Blautia Genus	Bacteria_Firmicutes_Clostridia_Lachnospirales_Lachnospiraceae_Blautia	FAST	negative	ala-ile-ala	cytosine	4-imidazoleacetate	X-26265	1-methyl-5-imidazolelactate	lysine	gamma-glutamylleucine	X-15461	X-17852	nicotinate ribonucleoside	1-stearoyl-GPS (18:0)*	X-25708	docosapentaenoate (DPA; 22:5n3)	X-14454	thiamin (vitamin B1)	taurolithocholate 3-sulfate	N-acetylhistidine	1-palmitoyl-galactosylglycerol (16:0)*	X-25681	arachidonate (20:4n6)	X-17910	X-15854	X-22030	X-25247	beta-sitosterol	N-acetyl-cadaverine	N-acetyl-beta-glucosaminylamine	X-25535	vitamin D3 sulfate	N-acetylasparagine	methylphosphate	N-palmitoyl-sphingosine (d18:1/16:0)	X-16391	asparagine	X-17969	4-hydroxyphenylacetate	phosphate	campesterol	X-25701	X-25537	pyridoxamine	X-18278	X-25717	3beta-hydroxy-5-cholestenoate	protoporphyrin IX	X-25676
seq_65_plautii	Bacteria_Firmicutes_Clostridia_Oscillospirales_Oscillospiraceae_Flavonifractor_plautii	FAST	negative	X-25490	imidazole lactate	X-14392	bilirubin degradation product, C17H18N2O4 (3)**	X-25564	phenethylamine	X-17960	trimethylamine N-oxide	(3'-5')-guanylyladenosine*	N-methylproline	X-25045	tricarballylate	X-14383	X-25950	(3'-5')-adenylylcytidine	fumarate	5-oxoproline	taurolithocholate 3-sulfate	(3'-5')-adenylyladenosine*	anserine	taurodeoxycholic acid 3-sulfate	X-25433
seq_141_Oscillospiraceae Family	Bacteria_Firmicutes_Clostridia_Oscillospirales_Oscillospiraceae	FAST	negative	hippurate	glutarate (C5-DC)	hexanoyltaurine	X-26266	X-19232	palmitoleoylcarnitine (C16:1)*	dihydroferulic acid sulfate	ceramide (d18:2/16:0, d18:1/16:1, d16:1/18:1)*	X-18345	succinate	daidzein	phenylacetylglutamine	X-26127
seq_25_Anaeroplasma Genus	Bacteria_Firmicutes_Bacilli_Acholeplasmatales_Acholeplasmataceae_Anaeroplasma_Anaeroplasma Genus	FAST	negative	beta-guanidinopropanoate	3-hydroxysuberate	N6-carboxyethyllysine	valerylglycine (C5)	3-ureidopropionate	N-acetylisoleucine	butyrylputrescine/isobutyrylputrescine	7-ketodeoxycholate	3-(4-hydroxyphenyl)propionate	X-24753	isovalerylglycine	3-amino-2-piperidone	N-formylmethionine	4-acetamidobutanoate	N-acetylphenylalanine	N-acetylvaline	N-acetyltyrosine	beta-alanine	N-acetylhistamine	N-acetyl-beta-alanine	histamine
seq_41_[Clostridium] innocuum group Genus	Bacteria_Firmicutes_Bacilli_Erysipelotrichales_Erysipelotrichaceae_[Clostridium] innocuum group	FAST	negative	(3'-5')-adenylylcytidine	pyridoxal	spermidine	prolylproline	4-hydroxyphenylacetate	X-25502	X-24729	X-25709	1-palmitoyl-2-linoleoyl-galactosylglycerol (16:0/18:2)*	choline	X-25710	cis-urocanate	X-25564	2'-O-methyluridine	(3'-5')-guanylyladenosine*	2-palmitoyl-GPC (16:0)*	X-25518	phytosphingosine	X-16391	leucine	(3'-5')-adenylylguanosine*	oxindolylalanine	X-25717	X-17910	gamma-glutamylleucine	tyrosine	tryptophan	X-25490	anserine	pantothenate (Vitamin B5)	taurodeoxycholic acid 3-sulfate	sedoheptulose	X-14056	valine	N-acetyl-beta-glucosaminylamine	TMP	phenylalanine	lysine	X-14392	X-18278	ala-leu-ala	pyridoxamine	X-25532	3beta-hydroxy-5-cholestenoate	(3'-5')-adenylyladenosine*	X-17877
seq_15_Alistipes Genus	Bacteria_Bacteroidota_Bacteroidia_Bacteroidales_Rikenellaceae_Alistipes_Alistipes Genus	FAST	negative	1-stearoyl-GPS (18:0)*	N-palmitoyl-sphinganine (d18:0/16:0)	X-25681	N-palmitoyl-sphingosine (d18:1/16:0)	cytosine	glycerol 3-phosphate	eicosenoylcarnitine (C20:1)*	glycylproline	3-hydroxymargaroylglycine	2-palmitoyl-galactosylglycerol (16:0)*	X-17919	5-aminovalerate	X-18278	X-17852	hexadecanedioate (C16)	dehydrophytosphingosine*	X-17910	X-25532	3,5-dihydroxyphenylpropionate	(12 or 13)-methylmyristate (a15:0 or i15:0)	hexadecasphinganine (d16:0)*	1-palmitoyl-galactosylglycerol (16:0)*	N6-methyllysine	isoursodeoxycholate sulfate (1)	1-(1-enyl-stearoyl)-GPE (P-18:0)*	N-acetylglucosamine/N-acetylgalactosamine	2-oleoyl-GPC (18:1)*	X-15608	X-17877	AMP	nicotinate	1-(1-enyl-palmitoyl)-GPE (P-16:0)*	X-22062	N6,N6,N6-trimethyllysine	octadecenedioate (C18:1-DC)	X-25482	X-20172	palmitoyl sphingomyelin (d18:1/16:0)	arachidonate (20:4n6)	I-urobilinogen	N-palmitoyl-phytosphingosine (t18:0/16:0)	2-piperidinone	4-imidazoleacetate	1-margaroyl-GPE (17:0)*	sphinganine	nicotinate ribonucleoside
seq_247_aerofaciens	Bacteria_Actinobacteriota_Coriobacteriia_Coriobacteriales_Coriobacteriaceae_Collinsella_aerofaciens	FAST	negative	indole-3-carboxylate	enterolactone sulfate	1-methylguanidine	formononetin	enterodiol	X-25854	X-23105	2-hydroxysebacate	hexadecadienoate (16:2n6)	X-26103	X-22776	7-ketolithocholate	N-stearoylserine*	N-oleoylserine	3,5-dihydroxybenzoic acid	1-palmitoleoylglycerol (16:1)*	1-palmitoyl-digalactosylglycerol (16:0)*	equol	6-oxopiperidine-2-carboxylate	N-linoleoylglycine	3-hydroxypalmitate	N-acetylsphingosine	ceramide (d18:2/16:0, d18:1/16:1, d16:1/18:1)*	X-15245	hexadecatrienoate (16:3n3)	tetradecadienoate (14:2)*	X-12828	X-23048	N,N,N-trimethyl-5-aminovalerate	heptadecatrienoate (17:3)*	tauroursodeoxycholate	hexanoyltaurine	X-26127	dihydroferulic acid sulfate	hippurate
seq_64_Escherichia-Shigella Genus	Bacteria_Proteobacteria_Gammaproteobacteria_Enterobacterales_Enterobacteriaceae_Escherichia-Shigella	FAST	negative	(3'-5')-adenylylguanosine*	spermidine	fumarate	glycerate	indolelactate	(3'-5')-guanylyladenosine*	sulfate*	(3'-5')-adenylylcytidine	imidazole lactate	(3'-5')-cytidylylcytidine*	X-25949	(3'-5')-cytidylyluridine*	(3'-5')-adenylyladenosine*	galactosylglycerol	2-hydroxyglutarate	mannonate*	(3'-5')-uridylylcytidine*	(3'-5')-uridylyluridine	5-oxoproline
seq_3_muciniphila	Bacteria_Verrucomicrobiota_Verrucomicrobiae_Verrucomicrobiales_Akkermansiaceae_Akkermansia_muciniphila	FAST	negative	myristate (14:0)	palmitate (16:0)	X-25535	acetylcarnitine (C2)	1-linoleoyl-GPE (18:2)*	X-15461	orotate	X-25109	glycerate	naringenin	X-23105	palmitoleate (16:1n7)	hydroxyproline	2-linoleoylglycerol (18:2)	N1,N12-diacetylspermine	phosphocholine	10-heptadecenoate (17:1n7)	X-17877	1-palmitoyl-galactosylglycerol (16:0)*	N-acetyl-3-methylhistidine*	X-17910	pterin	1-linoleoylglycerol (18:2)	N-acetylasparagine	X-15136	2,3-dihydroxy-5-methylthio-4-pentenoate (DMTPA)*	N-monomethylarginine	N-delta-acetylornithine	1-oleoyl-GPG (18:1)*	3beta-hydroxy-5-cholestenoate	X-17919	N6,N6,N6-trimethyllysine	glycylproline	X-25957	1-stearoyl-2-oleoyl-GPC (18:0/18:1)	X-25532	fructose	N2-acetyllysine	FAD	N-acetylaspartate (NAA)	inosine	2-stearoyl-GPE (18:0)*	X-11787	9,10-DiHOME	3-hydroxysuberate	2-aminoadipate
seq_488_Butyricicoccus Genus	Bacteria_Firmicutes_Clostridia_Oscillospirales_Butyricicoccaceae_Butyricicoccus_Butyricicoccus Genus	SLOW	negative	pyroglutamylvaline	1,1-kestotetraose	valine	1-methyladenine	3-ketosphinganine	X-25690	alpha-tocopherol	ribose	formiminoglutamate	hydroxymethylpyrimidine	S-carboxymethyl-cysteine	N-acetylglycine	X-25518	X-25717	norvaline	TMP	X-20100	isoleucylglycine	dihydroorotate	2'-deoxyuridine	gamma-glutamylalanine	N-acetylcitrulline	o-tyrosine	X-25946	alanine	deoxycarnitine	N-acetyl-beta-glucosaminylamine	gamma-glutamyltyrosine	saccharopine	2-hydroxylignocerate*	gamma-glutamylphenylalanine
seq_49_bacterium	Bacteria_Firmicutes_Clostridia_Lachnospirales_Lachnospiraceae_Lachnospiraceae NK4A136 group_bacterium	SLOW	negative	N-acetylhomocitrulline	taurolithocholate 3-sulfate	X-25717	X-25676	X-12680	X-25670	X-15853	tyrosol	X-24425	N-acetyl-aspartyl-glutamate (NAAG)	X-23644	X-23060	X-24753	3-hydroxy-3-methylglutarate	5-hydroxylysine	X-25485	phenylalanylalanine	lactobionate	prolylalanine	3-indoleglyoxylic acid	3-sulfo-alanine	taurodeoxycholic acid 3-sulfate	X-25534	glycylvaline	gamma-glutamyl-epsilon-lysine	2-isopropylmalate	X-18410	pheophytin A	X-14383	pentose acid*	glutamine	saccharopine	X-14454	X-25701	adenine	X-14392	X-21788	glycerophosphoinositol*	alpha-glutamylglutamate	X-25433	X-25708	phenylacetyltaurine	X-18167	X-17960	gamma-glutamyl-alpha-lysine	taurine
seq_572_Lachnoclostridium Genus	Bacteria_Firmicutes_Clostridia_Lachnospirales_Lachnospiraceae_Lachnoclostridium	SLOW	negative	N,N,N-trimethyl-5-aminovalerate	anthranilate	3-methyl-2-oxobutyrate	7,12-diketolithocholate	gamma-glutamylglutamate	isoleucine	picolinate	heptadecatrienoate (17:3)*	trans-urocanate	gamma-glutamyltyrosine	allo-threonine	4-cholesten-3-one	betaine	(16 or 17)-methylstearate (a19:0 or i19:0)	homocysteine	p-hydroxybenzaldehyde	(14 or 15)-methylpalmitate (a17:0 or i17:0)	X-24359	dodecenedioate (C12:1-DC)*	4-hydroxyphenylpyruvate	gamma-glutamylisoleucine*	octadecanedioate (C18)	1-methyladenine	oleanolate	5-hydroxyhexanoate	methylsuccinate	allantoin	azelate (C9-DC)	sebacate (C10-DC)	thymine	pantoate	3-hydroxystearate	equol	heptanoate (7:0)	hexanoyltaurine	gamma-glutamylalanine	tauroursodeoxycholate	X-26103	3,5-dihydroxybenzoic acid	palmitoylcholine	taurochenodeoxycholate	coprostanol	dihydroferulic acid sulfate	hippurate
seq_109_massiliensis	Bacteria_Firmicutes_Clostridia_Lachnospirales_Lachnospiraceae_Blautia_massiliensis	SLOW	negative	methylmalonate (MMA)	thioproline	1-palmitoleoylglycerol (16:1)*	2-hydroxymyristate	enterolactone sulfate	X-18345	N-oleoylserine	gamma-glutamylalanine	heptadecasphingosine (d17:1)	diosmetin	indole-3-carboxylate	N-stearoyl-sphingosine (d18:1/18:0)*	3,5-dihydroxybenzoic acid	1-deoxysphinganine (m18:0)	1-palmityl-GPC (O-16:0)	palmitoleoylcarnitine (C16:1)*	thymine	formononetin	N-linoleoylglycine	7-ketolithocholate	1-palmitoyl-digalactosylglycerol (16:0)*	1-methylguanidine	guanidinoacetate	ceramide (d18:2/16:0, d18:1/16:1, d16:1/18:1)*	N-stearoylserine*	N,N,N-trimethyl-5-aminovalerate	X-23048	heptadecatrienoate (17:3)*	X-26103	X-15245	3-hydroxypalmitate	X-26127	X-12828	N-acetylsphingosine	tetradecadienoate (14:2)*	tauroursodeoxycholate	equol	hexanoyltaurine	dihydroferulic acid sulfate	hippurate
seq_349_Lachnospiraceae UCG-010 Genus	Bacteria_Firmicutes_Clostridia_Lachnospirales_Lachnospiraceae_Lachnospiraceae UCG-010_Lachnospiraceae UCG-010 Genus	SLOW	negative	myristoleate (14:1n5)	2-methylcitrate/homocitrate	adenine	2-hydroxy-4-(methylthio)butanoic acid	methylmalonate (MMA)	sedoheptulose	X-15245	N-acetylthreonine	alpha-ketoglutarate	hydroxyproline	mannitol/sorbitol	thioproline	mannonate*	X-25758	2-oxoarginine*	ethylmalonate	3-(4-hydroxyphenyl)lactate (HPLA)	2,3-dihydroxyisovalerate	X-25539	acetylcarnitine (C2)	palmitoleoylcarnitine (C16:1)*	cysteine	galactonate	2,4-dihydroxybutyrate	N-acetylglutamine	4-hydroxybenzoate	dimethylarginine (ADMA + SDMA)	hexadecasphingosine (d16:1)*	alpha-hydroxyisocaproate	gulonate*	2-hydroxy-3-methylvalerate	succinate
seq_1_Turicibacter Genus	Bacteria_Firmicutes_Bacilli_Erysipelotrichales_Erysipelotrichaceae_Turicibacter	SLOW	negative	2-O-methylascorbic acid	cytidine	phenethylamine	2-hydroxyadipate	imidazole propionate	X-24408	trimethylamine N-oxide	taurocholenate sulfate*	X-25949	X-12680	tricarballylate	taurolithocholate 3-sulfate	X-25433	taurodeoxycholic acid 3-sulfate
seq_2_vulgatus	Bacteria_Bacteroidota_Bacteroidia_Bacteroidales_Bacteroidaceae_Bacteroides_vulgatus	SLOW	negative	lysylalanine	N-formylmethionine	4-methylcatechol sulfate	cytidine	3-aminoisobutyrate	2,4-dihydroxybutyrate	catechol sulfate	syringic acid	alpha-tocopherol acetate	histidylalanine	N,N-dimethyl-pro-pro	dihydrocaffeate sulfate (2)	3,4-dihydroxybutyrate	2-isopropylmalate	formononetin	taurocholate	X-23060	ribonate	creatinine	arabonate/xylonate	3-(4-hydroxyphenyl)lactate (HPLA)	daidzein	malonate
seq_6_Bacteroides Genus	Bacteria_Bacteroidota_Bacteroidia_Bacteroidales_Bacteroidaceae_Bacteroides_Bacteroides Genus	SLOW	negative	N,N-dimethyl-5-aminovalerate	X-14454	taurodeoxycholic acid 3-sulfate	X-18167	gamma-glutamyl-epsilon-lysine	5-oxoproline	3-methylglutarate/2-methylglutarate	X-23644	butyrylputrescine/isobutyrylputrescine	X-17960	bilirubin degradation product, C17H18N2O4 (3)**	X-14383	X-25534	X-25490	anserine	X-17969	fumarate	X-14392	creatinine	phenylacetyltaurine	X-25564	X-25709	X-25433
seq_11_Bacteroides Genus	Bacteria_Bacteroidota_Bacteroidia_Bacteroidales_Bacteroidaceae_Bacteroides_Bacteroides Genus	SLOW	negative	leucylalanine	malonate	X-25326	allo-threonine	picolinate	N-carbamoylaspartate	X-23277	X-24210	gamma-glutamylphenylalanine	saccharopine	pheophytin A	X-18345	pantoate	X-23278	catechol sulfate	4-hydroxybenzoate	histidylalanine	alpha-hydroxyisovalerate	alpha-tocopherol acetate	3-aminoisobutyrate	formononetin	glycerophosphoinositol*	N-acetylglycine	dihydroorotate	N-succinyl-phenylalanine	1,1-kestotetraose	2,4-dihydroxybutyrate	3,4-dihydroxybutyrate	alpha-hydroxyisocaproate	N-acetylmethionine sulfoxide	3-(4-hydroxyphenyl)lactate (HPLA)	2-hydroxy-3-methylvalerate	3-hydroxy-3-methylglutarate	N-acetylmethionine	daidzein
seq_30_distasonis	Bacteria_Bacteroidota_Bacteroidia_Bacteroidales_Tannerellaceae_Parabacteroides_distasonis	SLOW	negative	X-25534	creatinine	dimethylarginine (ADMA + SDMA)	X-12101	N-acetylaspartate (NAA)	adenosine	cytidine 2',3'-cyclic monophosphate	succinate	guanidinosuccinate	3,4-dihydroxybutyrate	3-(4-hydroxyphenyl)lactate (HPLA)	N-acetylglutamine	uridine-2',3'-cyclic monophosphate	2-hydroxy-4-(methylthio)butanoic acid	X-25950	2,4-dihydroxybutyrate
seq_32_merdae	Bacteria_Bacteroidota_Bacteroidia_Bacteroidales_Tannerellaceae_Parabacteroides_merdae	SLOW	negative	3-methylglutarate/2-methylglutarate	taurocholenate sulfate*	butyrylputrescine/isobutyrylputrescine	X-23644	trimethylamine N-oxide	X-25701	X-17960	bilirubin degradation product, C17H18N2O4 (3)**	glutaminylleucine	2,4-dihydroxybutyrate	galactonate	X-25490	X-25758	dimethylarginine (ADMA + SDMA)	succinate	anserine	pyrraline	5-oxoproline	X-14383	X-14392	X-25534	X-17969	X-14454	2-O-methylascorbic acid	X-18167	X-25564	3-(4-hydroxyphenyl)lactate (HPLA)	fumarate	X-25433	X-25709	creatinine
seq_83_putredinis	Bacteria_Bacteroidota_Bacteroidia_Bacteroidales_Rikenellaceae_Alistipes_putredinis	SLOW	negative	3-sulfo-alanine	sebacate (C10-DC)	imidazole lactate	bilirubin degradation product, C17H18N2O4 (3)**	X-23060	p-aminobenzoate (PABA)	alpha-glutamylglutamate	N-oleoyltaurine	anserine	taurine	X-24359	X-21788	X-26099	phenylacetyltaurine	N-acetyltaurine	X-23732
seq_111_finegoldii	Bacteria_Bacteroidota_Bacteroidia_Bacteroidales_Rikenellaceae_Alistipes_finegoldii	SLOW	negative	(3'-5')-uridylylcytidine*	creatinine	N-acetylglutamine	X-17984	trimethylamine N-oxide	(3'-5')-uridylylguanosine	(3'-5')-cytidylyluridine*	X-18167	X-25076	X-25537	X-25710	val-val-ala	X-14056	X-20100	X-23644	ala-leu-ala	hydantoin-5-propionate	X-25477	sulfate*	sphingosine	phenethylamine	pregnen-diol disulfate*	X-25709	N-acetylthreonine	X-25670	X-25716	anserine	X-25490	X-20172	taurolithocholate 3-sulfate	X-25717	X-25487	X-22030	2-O-methylascorbic acid	X-17960	X-14392	X-25676	X-16391	X-25701	X-25485	(3'-5')-guanylyladenosine*	succinate	X-25564	X-14254	taurodeoxycholic acid 3-sulfate	X-17969
seq_222_splanchnicus	Bacteria_Bacteroidota_Bacteroidia_Bacteroidales_Marinifilaceae_Odoribacter_splanchnicus	SLOW	negative	trans-urocanate	glutamate	X-17877	benzoate	methionine	X-14454	X-25710	3-hydroxybutyrate (BHBA)	2-hydroxyadipate	X-25533	X-20100	X-15608	X-15853	leucine	glycylproline	3-dehydroshikimate	pyruvate	X-25532	cis-urocanate	hypoxanthine	sedoheptulose	glycerophosphoethanolamine	sarcosine	X-25076	X-17852	acetylcarnitine (C2)	X-25708	X-25535	ala-ile-ala	D-urobilin	X-25482	X-25477	leucylglutamine*	valylglycine	isoleucylglycine	cholate sulfate	X-15854	carnitine	cysteine	3-ketosphinganine	fucose
seq_33_wadsworthia	Bacteria_Desulfobacterota_Desulfovibrionia_Desulfovibrionales_Desulfovibrionaceae_Bilophila_wadsworthia	SLOW	negative	X-25534	N-acetyl-beta-glucosaminylamine	beta-cryptoxanthin	isoleucine	deoxycarnitine	X-14392	X-26099	X-15853	taurine	pyroglutamylvaline	alpha-tocotrienol	X-23060	3-sulfo-alanine	bilirubin	lactate	phenylacetyltaurine	X-17960	X-21788	X-23732	X-25490	saccharopine	bilirubin degradation product, C17H18N2O4 (3)**	indoleacetate	N-acetyltaurine	gamma-glutamyl-epsilon-lysine	3-methylglutarate/2-methylglutarate	X-25709
seq_44_Akkermansia Genus	Bacteria_Verrucomicrobiota_Verrucomicrobiae_Verrucomicrobiales_Akkermansiaceae_Akkermansia_Akkermansia Genus	SLOW	negative	X-26103	diaminopimelate	coprostanol	indoleacetate	alpha-tocotrienol	X-23732	sebacate (C10-DC)	beta-cryptoxanthin	N,N-dimethyl-5-aminovalerate	docosadienoate (22:2n6)	lactobacillic acid	3-methylglutarate/2-methylglutarate	bilirubin	bilirubin degradation product, C17H18N2O4 (3)**	p-aminobenzoate (PABA)
[truncated: 57 more columns]

## Sheet: ASVs_corr_w_metabolite p<0.05
ID	Enriched in:	correlation	ASVs
3-methylglutarate/2-methylglutarate	fast	positive	seq_13_Blautia Genus	seq_212_Lachnospiraceae Family	seq_279_butyriciproducens	seq_227_Tuzzerella Genus	seq_262_GCA-900066575 Genus	seq_15_Alistipes Genus	seq_62_Odoribacter Genus	seq_240_Oscillospiraceae Family	seq_276_Lachnoclostridium Genus	seq_166_Lachnoclostridium Genus	seq_487_Lachnospiraceae UCG-009 Genus	seq_208_Lachnospiraceae UCG-001 Genus	seq_56_Lachnospiraceae UCG-001 Genus	seq_248_UBA1819 Genus	seq_145_laneus	seq_52_Lachnoclostridium Genus	seq_125_Lachnospiraceae UCG-009 Genus	seq_96_ramosum	seq_430_Paludicola Genus
bilirubin degradation product, C17H18N2O4 (3)**	fast	positive	seq_183_paraputrificum	seq_227_Tuzzerella Genus	seq_145_laneus	seq_52_Lachnoclostridium Genus	seq_248_UBA1819 Genus	seq_258_Lachnoclostridium Genus	seq_960_moorei	seq_195_Blautia Genus	seq_879_Lachnoclostridium Genus	seq_303_Clostridium sensu stricto 1 Genus	seq_703_DTU089 Genus	seq_261_Butyricimonas Genus	seq_353_Lachnospiraceae Family	seq_543_Candidatus Stoquefichus Genus	seq_641_Faecalitalea Genus	seq_874_pectinoschiza	seq_473_Roseburia Genus	seq_760_Faecalitalea Genus	seq_732_Gemella Genus	seq_430_Paludicola Genus	seq_403_[Ruminococcus] torques group Genus	seq_8_Lactobacillus Genus	seq_856_Lactococcus Genus	seq_103_Methanobrevibacter Genus	seq_747_odontolyticus
gamma-glutamyl-epsilon-lysine	fast	positive	seq_145_laneus	seq_52_Lachnoclostridium Genus	seq_227_Tuzzerella Genus	seq_651_Family XIII AD3011 group Genus	seq_96_ramosum	seq_248_UBA1819 Genus	seq_261_Butyricimonas Genus	seq_353_Lachnospiraceae Family	seq_15_Alistipes Genus	seq_430_Paludicola Genus	seq_433_Incertae Sedis Genus
glutaminylleucine	fast	positive	seq_148_comes	seq_244_inulinivorans	seq_571_Erysipelatoclostridium Genus	seq_791_Frisingicoccus Genus	seq_414_Streptococcus Genus	seq_314_intestinalis	seq_320_Lachnoclostridium Genus	seq_495_Christensenellaceae R-7 group Genus	seq_22_Blautia Genus	seq_598_Butyricicoccus Genus	seq_608_Lachnoclostridium Genus	seq_816_NK4A214 group Genus	seq_819_Lachnospiraceae UCG-004 Genus	seq_848_isoflavoniconvertens	seq_337_formicigenerans	seq_746_Lachnospiraceae Family	seq_561_intestini	seq_299_catus	seq_270_bacterium	seq_196_hadrus	seq_610_Marvinbryantia Genus	seq_224_Blautia Genus	seq_403_[Ruminococcus] torques group Genus	seq_204_[Ruminococcus] torques group Genus	seq_646_Desulfovibrio Genus	seq_974_Butyricicoccus Genus	seq_779_Colidextribacter Genus	seq_547_Incertae Sedis Genus	seq_191_Agathobacter Genus	seq_74_Faecalibacterium Genus	seq_416_[Eubacterium] coprostanoligenes group Family	seq_167_caecimuris	seq_80_faecis	seq_184_Bifidobacterium Genus	seq_158_longicatena	seq_351_Lachnospiraceae Family	seq_318_Lachnospiraceae ND3007 group Genus	seq_302_Butyricicoccus Genus	seq_668_pectinoschiza	seq_611_Haemophilus Genus	seq_115_obeum	seq_180_hadrus	seq_470_Lachnoclostridium Genus	seq_572_Lachnoclostridium Genus
glycylisoleucine	fast	positive	seq_561_intestini	seq_598_Butyricicoccus Genus	seq_608_Lachnoclostridium Genus	seq_816_NK4A214 group Genus	seq_819_Lachnospiraceae UCG-004 Genus	seq_848_isoflavoniconvertens	seq_470_Lachnoclostridium Genus	seq_611_Haemophilus Genus	seq_572_Lachnoclostridium Genus
glycylvaline	fast	positive	seq_611_Haemophilus Genus	seq_460_Lachnospiraceae Family
indoleacetate	fast	positive	seq_791_Frisingicoccus Genus	seq_117_Lachnoclostridium Genus	seq_148_comes	seq_244_inulinivorans	seq_571_Erysipelatoclostridium Genus	seq_78_massiliensis	seq_561_intestini	seq_598_Butyricicoccus Genus	seq_608_Lachnoclostridium Genus	seq_816_NK4A214 group Genus	seq_819_Lachnospiraceae UCG-004 Genus	seq_848_isoflavoniconvertens	seq_371_hominis	seq_247_aerofaciens	seq_363_Oscillospiraceae Family	seq_499_Catenibacillus Genus	seq_129_wadsworthia	seq_408_Streptococcus Genus	seq_134_ovatus	seq_430_Paludicola Genus	seq_187_[Eubacterium] hallii group Genus	seq_661_[Clostridium] methylpentosum group Family	seq_200_Incertae Sedis Genus	seq_275_Intestinimonas Genus	seq_375_subterminale	seq_683_[Eubacterium] nodatum group Genus	seq_694_Lachnoclostridium Genus	seq_426_Coriobacteriales Incertae Sedis Family	seq_173_Roseburia Genus	seq_372_Family XIII UCG-001 Genus
mannonate*	fast	positive	seq_246_Erysipelotrichaceae Family	seq_134_ovatus	seq_169_Lachnospiraceae NK4A136 group Genus	seq_210_Bacteroides Genus	seq_221_Lachnospiraceae NK4A136 group Genus	seq_239_Lachnoclostridium Genus	seq_305_Anaerovorax Genus	seq_422_Lachnospiraceae Family	seq_437_Holdemania Genus	seq_560_Incertae Sedis Genus	seq_795_Clostridia Class	seq_833_Oxalobacter Genus	seq_145_laneus	seq_52_Lachnoclostridium Genus	seq_315_Lachnoclostridium Genus	seq_194_Lachnospiraceae Family	seq_156_Ruminococcaceae Family	seq_316_Lactonifactor Genus	seq_317_Lachnospiraceae NK4A136 group Genus	seq_699_Ruminococcaceae Family	seq_166_Lachnoclostridium Genus	seq_487_Lachnospiraceae UCG-009 Genus	seq_272_Lachnospiraceae Family	seq_116_Oscillibacter Genus	seq_240_Oscillospiraceae Family	seq_622_hathewayi	seq_182_Lachnospiraceae Family	seq_125_Lachnospiraceae UCG-009 Genus	seq_556_Intestinimonas Genus	seq_612_[Eubacterium] brachy group Genus	seq_212_Lachnospiraceae Family	seq_430_Paludicola Genus	seq_276_Lachnoclostridium Genus	seq_208_Lachnospiraceae UCG-001 Genus	seq_56_Lachnospiraceae UCG-001 Genus	seq_79_Lachnospiraceae Family	seq_122_Lachnoclostridium Genus	seq_77_Oscillospiraceae Family
saccharopine	fast	positive	seq_112_pectinilyticus	seq_556_Intestinimonas Genus	seq_612_[Eubacterium] brachy group Genus	seq_935_Papillibacter Genus	seq_704_Hydrogenoanaerobacterium Family	seq_427_Peptococcaceae Family	seq_837_Anaerofilum Genus	seq_323_Lachnospiraceae NK4A136 group Genus	seq_523_Clostridia Class	seq_59_caccae	seq_14_Bacteroides Genus	seq_228_Bacteroides Genus	seq_665_Ruminococcaceae Family	seq_76_nordii	seq_471_Christensenellaceae R-7 group Genus	seq_92_Lachnoclostridium Genus	seq_233_[Eubacterium] xylanophilum group Genus	seq_500_Lachnospiraceae UCG-002 Genus	seq_659_Lachnospiraceae Family	seq_678_Lachnospiraceae Family	seq_781_Paludicola Genus	seq_575_GCA-900066755 Genus	seq_363_Oscillospiraceae Family	seq_3_muciniphila	seq_78_massiliensis	seq_25_Anaeroplasma Genus
X-14383	fast	positive	seq_777_Bifidobacterium Genus	seq_392_glucerasea	seq_445_Lachnospiraceae UCG-001 Genus	seq_516_prausnitzii	seq_525_[Eubacterium] eligens group Genus	seq_648_Lachnospira Genus	seq_720_Lachnospiraceae Family	seq_148_comes	seq_244_inulinivorans	seq_571_Erysipelatoclostridium Genus	seq_365_Bifidobacterium Genus	seq_370_[Ruminococcus] torques group Genus	seq_551_[Eubacterium] eligens group Genus	seq_581_Marvinbryantia Genus	seq_348_Roseburia Genus	seq_791_Frisingicoccus Genus	seq_558_Lachnospiraceae NK4A136 group Genus	seq_470_Lachnoclostridium Genus	seq_486_[Ruminococcus] torques group Genus	seq_520_CAG-56 Genus	seq_694_Lachnoclostridium Genus	seq_572_Lachnoclostridium Genus	seq_644_bacterium	seq_426_Coriobacteriales Incertae Sedis Family	seq_90_Bacteroides Genus	seq_661_[Clostridium] methylpentosum group Family	seq_823_Alistipes Genus	seq_760_Faecalitalea Genus	seq_59_caccae	seq_86_hydrogenotrophica	seq_416_[Eubacterium] coprostanoligenes group Family	seq_215_bicirculans	seq_732_Gemella Genus	seq_57_Agathobacter Genus	seq_196_hadrus	seq_610_Marvinbryantia Genus	seq_191_Agathobacter Genus	seq_270_bacterium	seq_403_[Ruminococcus] torques group Genus	seq_473_Roseburia Genus	seq_318_Lachnospiraceae ND3007 group Genus	seq_351_Lachnospiraceae Family	seq_404_NK4A214 group Genus	seq_454_prausnitzii	seq_504_UCG-005 Genus	seq_514_UCG-002 Genus	seq_839_Intestinimonas Genus
X-14392	fast	positive	seq_664_Blautia Genus	seq_770_Erysipelatoclostridium Genus	seq_866_Granulicatella Genus	seq_987_Lactonifactor Genus	seq_992_Anaerofustis Genus	seq_732_Gemella Genus	seq_543_Candidatus Stoquefichus Genus	seq_641_Faecalitalea Genus	seq_874_pectinoschiza	seq_303_Clostridium sensu stricto 1 Genus	seq_703_DTU089 Genus	seq_473_Roseburia Genus	seq_1013_NK4A214 group Genus	seq_640_Incertae Sedis Genus	seq_821_GCA-900066575 Genus	seq_747_odontolyticus	seq_386_Ruminococcus Genus	seq_766_Lachnospiraceae Family	seq_798_Lachnospiraceae FE2018 group Genus	seq_611_Haemophilus Genus	seq_103_Methanobrevibacter Genus	seq_59_caccae	seq_750_Christensenellaceae R-7 group Genus	seq_470_Lachnoclostridium Genus	seq_136_[Ruminococcus] gauvreauii group Genus	seq_337_formicigenerans	seq_746_Lachnospiraceae Family	seq_314_intestinalis	seq_320_Lachnoclostridium Genus	seq_495_Christensenellaceae R-7 group Genus	seq_484_Lachnoclostridium Genus	seq_414_Streptococcus Genus	seq_167_caecimuris	seq_572_Lachnoclostridium Genus	seq_164_prausnitzii	seq_445_Lachnospiraceae UCG-001 Genus	seq_516_prausnitzii	seq_525_[Eubacterium] eligens group Genus	seq_648_Lachnospira Genus	seq_720_Lachnospiraceae Family	seq_365_Bifidobacterium Genus	seq_370_[Ruminococcus] torques group Genus	seq_551_[Eubacterium] eligens group Genus	seq_581_Marvinbryantia Genus	seq_229_[Eubacterium] hallii group Genus	seq_215_bicirculans	seq_338_UCG-002 Genus
X-25522	fast	positive	seq_195_Blautia Genus	seq_879_Lachnoclostridium Genus	seq_258_Lachnoclostridium Genus	seq_960_moorei	seq_760_Faecalitalea Genus	seq_59_caccae	seq_561_intestini	seq_598_Butyricicoccus Genus	seq_608_Lachnoclostridium Genus	seq_816_NK4A214 group Genus	seq_819_Lachnospiraceae UCG-004 Genus	seq_848_isoflavoniconvertens	seq_106_massiliensis	seq_661_[Clostridium] methylpentosum group Family	seq_694_Lachnoclostridium Genus
X-25534	fast	positive	seq_54_Bacteroides Genus	seq_664_Blautia Genus	seq_770_Erysipelatoclostridium Genus	seq_866_Granulicatella Genus	seq_987_Lactonifactor Genus	seq_992_Anaerofustis Genus	seq_791_Frisingicoccus Genus	seq_486_[Ruminococcus] torques group Genus	seq_520_CAG-56 Genus	seq_1013_NK4A214 group Genus	seq_640_Incertae Sedis Genus	seq_821_GCA-900066575 Genus	seq_148_comes	seq_244_inulinivorans	seq_571_Erysipelatoclostridium Genus	seq_57_Agathobacter Genus	seq_644_bacterium	seq_558_Lachnospiraceae NK4A136 group Genus	seq_59_caccae	seq_337_formicigenerans	seq_746_Lachnospiraceae Family	seq_258_Lachnoclostridium Genus	seq_960_moorei	seq_694_Lachnoclostridium Genus	seq_314_intestinalis	seq_320_Lachnoclostridium Genus	seq_495_Christensenellaceae R-7 group Genus	seq_195_Blautia Genus	seq_879_Lachnoclostridium Genus	seq_668_pectinoschiza	seq_414_Streptococcus Genus	seq_158_longicatena	seq_302_Butyricicoccus Genus	seq_661_[Clostridium] methylpentosum group Family	seq_351_Lachnospiraceae Family	seq_318_Lachnospiraceae ND3007 group Genus	seq_392_glucerasea	seq_779_Colidextribacter Genus	seq_164_prausnitzii	seq_543_Candidatus Stoquefichus Genus	seq_641_Faecalitalea Genus	seq_874_pectinoschiza	seq_303_Clostridium sensu stricto 1 Genus	seq_703_DTU089 Genus	seq_404_NK4A214 group Genus	seq_454_prausnitzii	seq_504_UCG-005 Genus
X-25709	fast	positive	seq_644_bacterium	seq_15_Alistipes Genus	seq_694_Lachnoclostridium Genus	seq_167_caecimuris	seq_191_Agathobacter Genus	seq_136_[Ruminococcus] gauvreauii group Genus	seq_115_obeum	seq_661_[Clostridium] methylpentosum group Family	seq_8_Lactobacillus Genus	seq_856_Lactococcus Genus	seq_307_[Clostridium] innocuum group Genus	seq_326_Lachnospiraceae UCG-006 Genus	seq_531_Colidextribacter Genus	seq_700_Anaerofilum Genus	seq_779_Colidextribacter Genus	seq_74_Faecalibacterium Genus	seq_404_NK4A214 group Genus	seq_454_prausnitzii	seq_504_UCG-005 Genus	seq_514_UCG-002 Genus	seq_839_Intestinimonas Genus	seq_946_Angelakisella Genus	seq_505_Streptococcus Genus	seq_568_Lachnoclostridium Genus	seq_651_Family XIII AD3011 group Genus	seq_63_Defluviitaleaceae UCG-011 Genus	seq_732_Gemella Genus	seq_450_faecihominis	seq_473_Roseburia Genus	seq_429_Subdoligranulum Genus	seq_82_saccharivorans	seq_86_hydrogenotrophica	seq_747_odontolyticus	seq_379_[Eubacterium] hallii group Genus	seq_229_[Eubacterium] hallii group Genus	seq_204_[Ruminococcus] torques group Genus	seq_403_[Ruminococcus] torques group Genus	seq_338_UCG-002 Genus	seq_103_Methanobrevibacter Genus	seq_59_caccae	seq_164_prausnitzii	seq_760_Faecalitalea Genus	seq_484_Lachnoclostridium Genus	seq_247_aerofaciens	seq_268_Subdoligranulum Genus	seq_207_[Eubacterium] hallii group Genus	seq_301_Monoglobus Genus
X-26103	fast	positive	seq_10_caccae	seq_837_Anaerofilum Genus	seq_395_caecimuris	seq_154_Lachnospiraceae Family	seq_97_longoviformis	seq_111_finegoldii	seq_218_Turicibacter Genus	seq_263_Oscillospiraceae Family	seq_128_Oscillibacter Genus	seq_66_Roseburia Genus	seq_40_Marvinbryantia Genus	seq_248_UBA1819 Genus	seq_575_GCA-900066755 Genus	seq_96_ramosum	seq_116_Oscillibacter Genus	seq_279_butyriciproducens	seq_460_Lachnospiraceae Family	seq_62_Odoribacter Genus	seq_206_[Eubacterium] fissicatena group Genus	seq_15_Alistipes Genus	seq_110_GCA-900066575 Genus	seq_13_Blautia Genus
2-hydroxysebacate	slow	positive	seq_46_Lachnospiraceae Family	seq_43_Bacteroides Genus	seq_33_wadsworthia	seq_39_Lachnospiraceae NK4A136 group Genus	seq_35_Bacteroides Genus	seq_172_Lachnospiraceae Family	seq_121_Bacteroides Genus	seq_189_Barnesiellaceae Family	seq_519_Aerococcus Genus	seq_6_Bacteroides Genus	seq_65_plautii	seq_137_Roseburia Genus	seq_28_Lachnospiraceae NK4A136 group Genus	seq_81_Oscillospiraceae Family	seq_44_Akkermansia Genus	seq_249_Lachnospiraceae UCG-001 Genus	seq_1015_massiliensis	seq_100_Lachnospiraceae Family
3-hydroxysebacate	slow	positive	seq_85_intestinalis	seq_135_tayi	seq_384_lenta	seq_17_Blautia Genus	seq_6_Bacteroides Genus	seq_35_Bacteroides Genus	seq_249_Lachnospiraceae UCG-001 Genus	seq_64_Escherichia-Shigella Genus	seq_65_plautii	seq_519_Aerococcus Genus	seq_172_Lachnospiraceae Family	seq_137_Roseburia Genus	seq_43_Bacteroides Genus	seq_121_Bacteroides Genus	seq_189_Barnesiellaceae Family	seq_46_Lachnospiraceae Family	seq_33_wadsworthia
3-hydroxysuberate	slow	positive	seq_606_Family XIII AD3011 group Genus	seq_293_Jeotgalicoccus Genus	seq_101_Bacteroides Genus	seq_11_Bacteroides Genus	seq_488_Butyricicoccus Genus	seq_32_merdae	seq_105_vulgatus	seq_107_uniformis	seq_242_distasonis	seq_376_distasonis	seq_46_Lachnospiraceae Family	seq_137_Roseburia Genus	seq_43_Bacteroides Genus	seq_71_faecium	seq_1015_massiliensis	seq_33_wadsworthia
4-acetamidobutanoate	slow	positive	seq_43_Bacteroides Genus	seq_823_Alistipes Genus	seq_674_stercorihominis	seq_295_Dorea Genus	seq_33_wadsworthia	seq_71_faecium	seq_488_Butyricicoccus Genus
5-hydroxyindoleacetate	slow	positive	seq_7_uniformis	seq_1015_massiliensis	seq_43_Bacteroides Genus	seq_54_Bacteroides Genus	seq_70_Lachnospiraceae NK4A136 group Genus
enterodiol	slow	positive	seq_293_Jeotgalicoccus Genus	seq_101_Bacteroides Genus	seq_6_Bacteroides Genus	seq_343_Lachnospiraceae Family	seq_30_distasonis	seq_11_Bacteroides Genus	seq_9_Bacteroides Genus	seq_32_merdae	seq_458_fastidiosa	seq_274_[Eubacterium] siraeum group Genus	seq_2_vulgatus	seq_21_Hungatella Genus	seq_140_Lachnospiraceae Family	seq_181_Incertae Sedis Genus	seq_540_Colidextribacter Genus	seq_407_Clostridia UCG-014 Order	seq_479_Anaerotruncus Genus	seq_529_massiliensis	seq_89_Parasutterella Genus	seq_157_Lachnoclostridium Genus	seq_381_Clostridia vadinBB60 group Order	seq_411_Oscillibacter Genus	seq_722_Tuzzerella Genus	seq_135_tayi	seq_213_intestini	seq_384_lenta	seq_283_Lachnospiraceae Family	seq_71_faecium	seq_243_Pediococcus Genus	seq_84_clarus	seq_175_inops	seq_606_Family XIII AD3011 group Genus
glycerol 3-phosphate	slow	positive	seq_734_Cetobacterium Genus	seq_927_tanakaei	seq_58_Turicibacter Genus	seq_6_Bacteroides Genus	seq_347_Lachnospiraceae Family	seq_283_Lachnospiraceae Family	seq_161_finegoldii	seq_47_Lachnoclostridium Genus	seq_44_Akkermansia Genus	seq_35_Bacteroides Genus	seq_282_Bacteroidales Order	seq_876_indistinctus	seq_497_Staphylococcus Genus	seq_101_Bacteroides Genus	seq_251_Lachnoclostridium Genus	seq_280_equolifaciens	seq_33_wadsworthia	seq_137_Roseburia Genus	seq_114_Staphylococcus Genus	seq_7_uniformis	seq_83_putredinis
guanidinoacetate	slow	positive	seq_95_Lachnoclostridium Genus	seq_377_faecihominis	seq_172_Lachnospiraceae Family	seq_497_Staphylococcus Genus	seq_35_Bacteroides Genus	seq_1_Turicibacter Genus	seq_232_Clostridia vadinBB60 group Order	seq_213_intestini	seq_47_Lachnoclostridium Genus	seq_87_distasonis	seq_253_Blautia Genus	seq_33_wadsworthia	seq_28_Lachnospiraceae NK4A136 group Genus	seq_462_Lachnospiraceae Family	seq_98_Lachnospiraceae Family	seq_16_bacterium	seq_374_Oscillibacter Genus	seq_274_[Eubacterium] siraeum group Genus	seq_36_Lachnospiraceae NK4A136 group Genus	seq_249_Lachnospiraceae UCG-001 Genus	seq_283_Lachnospiraceae Family	seq_101_Bacteroides Genus	seq_251_Lachnoclostridium Genus	seq_7_uniformis	seq_626_hongkongensis	seq_27_Lachnospiraceae UCG-006 Genus	seq_110_GCA-900066575 Genus	seq_293_Jeotgalicoccus Genus	seq_32_merdae	seq_343_Lachnospiraceae Family	seq_282_Bacteroidales Order	seq_65_plautii	seq_137_Roseburia Genus	seq_111_finegoldii	seq_6_Bacteroides Genus	seq_114_Staphylococcus Genus
histamine	slow	positive	seq_71_faecium	seq_44_Akkermansia Genus	seq_33_wadsworthia
N-acetylhistamine	slow	positive	seq_222_splanchnicus	seq_71_faecium	seq_470_Lachnoclostridium Genus	seq_572_Lachnoclostridium Genus	seq_184_Bifidobacterium Genus	seq_540_Colidextribacter Genus
N-palmitoyl-sphinganine (d18:0/16:0)	slow	positive	seq_64_Escherichia-Shigella Genus	seq_39_Lachnospiraceae NK4A136 group Genus	seq_175_inops	seq_6_Bacteroides Genus	seq_606_Family XIII AD3011 group Genus	seq_630_valericigenes	seq_796_massiliensis	seq_17_Blautia Genus
octadecenedioate (C18:1-DC)	slow	positive	seq_606_Family XIII AD3011 group Genus	seq_463_filiformis	seq_87_distasonis	seq_175_inops	seq_101_Bacteroides Genus	seq_349_Lachnospiraceae UCG-010 Genus	seq_32_merdae	seq_30_distasonis	seq_71_faecium	seq_2_vulgatus
3-methylglutarate/2-methylglutarate	fast	negative	seq_33_wadsworthia	seq_39_Lachnospiraceae NK4A136 group Genus	seq_44_Akkermansia Genus	seq_43_Bacteroides Genus	seq_35_Bacteroides Genus	seq_100_Lachnospiraceae Family	seq_6_Bacteroides Genus	seq_734_Cetobacterium Genus	seq_927_tanakaei	seq_137_Roseburia Genus	seq_32_merdae
bilirubin degradation product, C17H18N2O4 (3)**	fast	negative	seq_44_Akkermansia Genus	seq_33_wadsworthia	seq_374_Oscillibacter Genus	seq_6_Bacteroides Genus	seq_43_Bacteroides Genus	seq_32_merdae	seq_65_plautii	seq_83_putredinis	seq_35_Bacteroides Genus
gamma-glutamyl-epsilon-lysine	fast	negative	seq_33_wadsworthia	seq_137_Roseburia Genus	seq_35_Bacteroides Genus	seq_479_Anaerotruncus Genus	seq_7_uniformis	seq_407_Clostridia UCG-014 Order	seq_49_bacterium	seq_140_Lachnospiraceae Family	seq_181_Incertae Sedis Genus	seq_6_Bacteroides Genus	seq_283_Lachnospiraceae Family	seq_91_Oscillibacter Genus	seq_100_Lachnospiraceae Family	seq_282_Bacteroidales Order	seq_529_massiliensis	seq_89_Parasutterella Genus	seq_157_Lachnoclostridium Genus	seq_381_Clostridia vadinBB60 group Order	seq_411_Oscillibacter Genus	seq_722_Tuzzerella Genus
glutaminylleucine	fast	negative	seq_49_bacterium	seq_206_[Eubacterium] fissicatena group Genus	seq_283_Lachnospiraceae Family	seq_479_Anaerotruncus Genus	seq_140_Lachnospiraceae Family	seq_181_Incertae Sedis Genus	seq_407_Clostridia UCG-014 Order	seq_213_intestini	seq_137_Roseburia Genus	seq_238_Colidextribacter Genus	seq_114_Staphylococcus Genus	seq_124_Lachnospiraceae NK4A136 group Genus	seq_39_Lachnospiraceae NK4A136 group Genus	seq_100_Lachnospiraceae Family	seq_28_Lachnospiraceae NK4A136 group Genus	seq_88_Lachnoclostridium Genus	seq_94_Enterococcus Genus	seq_98_Lachnospiraceae Family	seq_32_merdae	seq_179_Lachnospiraceae UCG-001 Genus	seq_274_[Eubacterium] siraeum group Genus
glycylisoleucine	fast	negative	seq_94_Enterococcus Genus	seq_914_Clostridia Class	seq_479_Anaerotruncus Genus	seq_404_NK4A214 group Genus	seq_454_prausnitzii	seq_504_UCG-005 Genus	seq_514_UCG-002 Genus	seq_839_Intestinimonas Genus	seq_946_Angelakisella Genus	seq_505_Streptococcus Genus	seq_568_Lachnoclostridium Genus	seq_283_Lachnospiraceae Family	seq_31_Citrobacter Genus	seq_232_Clostridia vadinBB60 group Order	seq_124_Lachnospiraceae NK4A136 group Genus
glycylvaline	fast	negative	seq_914_Clostridia Class	seq_479_Anaerotruncus Genus	seq_124_Lachnospiraceae NK4A136 group Genus	seq_31_Citrobacter Genus	seq_283_Lachnospiraceae Family	seq_94_Enterococcus Genus	seq_49_bacterium	seq_179_Lachnospiraceae UCG-001 Genus	seq_559_Family XIII AD3011 group Genus	seq_407_Clostridia UCG-014 Order	seq_140_Lachnospiraceae Family	seq_181_Incertae Sedis Genus	seq_157_Lachnoclostridium Genus	seq_381_Clostridia vadinBB60 group Order	seq_411_Oscillibacter Genus	seq_722_Tuzzerella Genus	seq_84_clarus	seq_529_massiliensis	seq_89_Parasutterella Genus	seq_232_Clostridia vadinBB60 group Order
indoleacetate	fast	negative	seq_100_Lachnospiraceae Family	seq_33_wadsworthia	seq_35_Bacteroides Genus	seq_137_Roseburia Genus	seq_91_Oscillibacter Genus	seq_172_Lachnospiraceae Family	seq_519_Aerococcus Genus	seq_121_Bacteroides Genus	seq_189_Barnesiellaceae Family	seq_44_Akkermansia Genus	seq_425_Lachnospiraceae Family	seq_39_Lachnospiraceae NK4A136 group Genus	seq_283_Lachnospiraceae Family	seq_274_[Eubacterium] siraeum group Genus	seq_177_Lachnospiraceae Family
mannonate*	fast	negative	seq_64_Escherichia-Shigella Genus	seq_137_Roseburia Genus	seq_425_Lachnospiraceae Family	seq_63_Defluviitaleaceae UCG-011 Genus	seq_172_Lachnospiraceae Family	seq_349_Lachnospiraceae UCG-010 Genus	seq_39_Lachnospiraceae NK4A136 group Genus	seq_519_Aerococcus Genus	seq_750_Christensenellaceae R-7 group Genus	seq_386_Ruminococcus Genus	seq_766_Lachnospiraceae Family	seq_798_Lachnospiraceae FE2018 group Genus
saccharopine	fast	negative	seq_488_Butyricicoccus Genus	seq_33_wadsworthia	seq_71_faecium	seq_127_Turicibacter Genus	seq_567_Lachnoclostridium Genus	seq_49_bacterium	seq_124_Lachnospiraceae NK4A136 group Genus	seq_4_Clostridium sensu stricto 1 Genus	seq_179_Lachnospiraceae UCG-001 Genus	seq_674_stercorihominis	seq_238_Colidextribacter Genus	seq_11_Bacteroides Genus	seq_559_Family XIII AD3011 group Genus	seq_137_Roseburia Genus
X-14383	fast	negative	seq_29_Lachnospiraceae NK4A136 group Genus	seq_114_Staphylococcus Genus	seq_88_Lachnoclostridium Genus	seq_110_GCA-900066575 Genus	seq_111_finegoldii	seq_41_[Clostridium] innocuum group Genus	seq_5_Lachnoclostridium Genus	seq_137_Roseburia Genus	seq_132_cateniformis	seq_290_Ureaplasma Genus	seq_206_[Eubacterium] fissicatena group Genus	seq_32_merdae	seq_497_Staphylococcus Genus	seq_343_Lachnospiraceae Family	seq_6_Bacteroides Genus	seq_157_Lachnoclostridium Genus	seq_381_Clostridia vadinBB60 group Order	seq_411_Oscillibacter Genus	seq_722_Tuzzerella Genus	seq_529_massiliensis	seq_89_Parasutterella Genus	seq_282_Bacteroidales Order	seq_98_Lachnospiraceae Family	seq_49_bacterium	seq_65_plautii	seq_279_butyriciproducens	seq_213_intestini	seq_4_Clostridium sensu stricto 1 Genus	seq_697_suicloacalis	seq_192_Clostridia vadinBB60 group Order	seq_127_Turicibacter Genus	seq_177_Lachnospiraceae Family	seq_47_Lachnoclostridium Genus	seq_253_Blautia Genus	seq_519_Aerococcus Genus
X-14392	fast	negative	seq_114_Staphylococcus Genus	seq_29_Lachnospiraceae NK4A136 group Genus	seq_137_Roseburia Genus	seq_88_Lachnoclostridium Genus	seq_213_intestini	seq_47_Lachnoclostridium Genus	seq_110_GCA-900066575 Genus	seq_6_Bacteroides Genus	seq_5_Lachnoclostridium Genus	seq_111_finegoldii	seq_343_Lachnospiraceae Family	seq_206_[Eubacterium] fissicatena group Genus	seq_49_bacterium	seq_407_Clostridia UCG-014 Order	seq_41_[Clostridium] innocuum group Genus	seq_140_Lachnospiraceae Family	seq_181_Incertae Sedis Genus	seq_98_Lachnospiraceae Family	seq_32_merdae	seq_157_Lachnoclostridium Genus	seq_381_Clostridia vadinBB60 group Order	seq_411_Oscillibacter Genus	seq_722_Tuzzerella Genus	seq_529_massiliensis	seq_89_Parasutterella Genus	seq_497_Staphylococcus Genus	seq_132_cateniformis	seq_283_Lachnospiraceae Family	seq_251_Lachnoclostridium Genus	seq_279_butyriciproducens	seq_91_Oscillibacter Genus	seq_100_Lachnospiraceae Family	seq_175_inops	seq_290_Ureaplasma Genus	seq_253_Blautia Genus	seq_697_suicloacalis	seq_33_wadsworthia	seq_177_Lachnospiraceae Family	seq_65_plautii	seq_519_Aerococcus Genus	seq_28_Lachnospiraceae NK4A136 group Genus	seq_121_Bacteroides Genus	seq_189_Barnesiellaceae Family	seq_172_Lachnospiraceae Family
X-25522	fast	negative	seq_409_shahii	seq_273_invisus	seq_73_CAG-352 Genus	seq_420_bartlettii	seq_559_Family XIII AD3011 group Genus
X-25534	fast	negative	seq_29_Lachnospiraceae NK4A136 group Genus	seq_114_Staphylococcus Genus	seq_110_GCA-900066575 Genus	seq_88_Lachnoclostridium Genus	seq_111_finegoldii	seq_5_Lachnoclostridium Genus	seq_497_Staphylococcus Genus	seq_137_Roseburia Genus	seq_41_[Clostridium] innocuum group Genus	seq_290_Ureaplasma Genus	seq_279_butyriciproducens	seq_132_cateniformis	seq_32_merdae	seq_6_Bacteroides Genus	seq_343_Lachnospiraceae Family	seq_157_Lachnoclostridium Genus	seq_381_Clostridia vadinBB60 group Order	seq_411_Oscillibacter Genus	seq_722_Tuzzerella Genus	seq_529_massiliensis	seq_89_Parasutterella Genus	seq_213_intestini	seq_98_Lachnospiraceae Family	seq_49_bacterium	seq_87_distasonis	seq_697_suicloacalis	seq_4_Clostridium sensu stricto 1 Genus	seq_626_hongkongensis	seq_127_Turicibacter Genus	seq_33_wadsworthia	seq_282_Bacteroidales Order	seq_253_Blautia Genus	seq_192_Clostridia vadinBB60 group Order	seq_30_distasonis
X-25709	fast	negative	seq_49_bacterium	seq_33_wadsworthia	seq_137_Roseburia Genus	seq_479_Anaerotruncus Genus	seq_32_merdae	seq_114_Staphylococcus Genus	seq_124_Lachnospiraceae NK4A136 group Genus	seq_6_Bacteroides Genus	seq_28_Lachnospiraceae NK4A136 group Genus	seq_98_Lachnospiraceae Family	seq_407_Clostridia UCG-014 Order	seq_283_Lachnospiraceae Family	seq_88_Lachnoclostridium Genus	seq_140_Lachnospiraceae Family	seq_181_Incertae Sedis Genus	seq_163_Roseburia Genus	seq_213_intestini	seq_157_Lachnoclostridium Genus	seq_381_Clostridia vadinBB60 group Order	seq_411_Oscillibacter Genus	seq_722_Tuzzerella Genus	seq_529_massiliensis	seq_89_Parasutterella Genus	seq_111_finegoldii	seq_29_Lachnospiraceae NK4A136 group Genus	seq_194_Lachnospiraceae Family	seq_39_Lachnospiraceae NK4A136 group Genus	seq_179_Lachnospiraceae UCG-001 Genus	seq_100_Lachnospiraceae Family	seq_7_uniformis	seq_238_Colidextribacter Genus	seq_232_Clostridia vadinBB60 group Order	seq_91_Oscillibacter Genus	seq_290_Ureaplasma Genus	seq_251_Lachnoclostridium Genus	seq_41_[Clostridium] innocuum group Genus	seq_4_Clostridium sensu stricto 1 Genus	seq_121_Bacteroides Genus	seq_189_Barnesiellaceae Family	seq_343_Lachnospiraceae Family	seq_519_Aerococcus Genus
X-26103	fast	negative	seq_115_obeum	seq_180_hadrus	seq_299_catus	seq_191_Agathobacter Genus	seq_74_Faecalibacterium Genus	seq_668_pectinoschiza	seq_158_longicatena	seq_302_Butyricicoccus Genus	seq_351_Lachnospiraceae Family	seq_318_Lachnospiraceae ND3007 group Genus	seq_416_[Eubacterium] coprostanoligenes group Family	seq_470_Lachnoclostridium Genus	seq_572_Lachnoclostridium Genus	seq_22_Blautia Genus	seq_119_Streptococcus Genus	seq_204_[Ruminococcus] torques group Genus	seq_80_faecis	seq_167_caecimuris	seq_301_Monoglobus Genus	seq_268_Subdoligranulum Genus	seq_109_massiliensis	seq_57_Agathobacter Genus	seq_644_bacterium	seq_791_Frisingicoccus Genus	seq_486_[Ruminococcus] torques group Genus	seq_520_CAG-56 Genus	seq_148_comes	seq_244_inulinivorans	seq_571_Erysipelatoclostridium Genus	seq_558_Lachnospiraceae NK4A136 group Genus	seq_337_formicigenerans	seq_746_Lachnospiraceae Family	seq_314_intestinalis	seq_320_Lachnoclostridium Genus	seq_495_Christensenellaceae R-7 group Genus	seq_414_Streptococcus Genus	seq_543_Candidatus Stoquefichus Genus	seq_641_Faecalitalea Genus	seq_874_pectinoschiza	seq_303_Clostridium sensu stricto 1 Genus	seq_703_DTU089 Genus	seq_611_Haemophilus Genus	seq_215_bicirculans	seq_196_hadrus	seq_610_Marvinbryantia Genus	seq_270_bacterium	seq_184_Bifidobacterium Genus
2-hydroxysebacate	slow	negative	seq_240_Oscillospiraceae Family	seq_489_faecihominis	seq_371_hominis	seq_408_Streptococcus Genus	seq_473_Roseburia Genus	seq_732_Gemella Genus	seq_486_[Ruminococcus] torques group Genus	seq_520_CAG-56 Genus	seq_791_Frisingicoccus Genus	seq_553_Paraprevotella Genus	seq_247_aerofaciens	seq_757_Eubacterium Genus	seq_644_bacterium	seq_148_comes	seq_244_inulinivorans	seq_571_Erysipelatoclostridium Genus	seq_558_Lachnospiraceae NK4A136 group Genus	seq_14_Bacteroides Genus	seq_779_Colidextribacter Genus	seq_1013_NK4A214 group Genus	seq_640_Incertae Sedis Genus	seq_821_GCA-900066575 Genus	seq_664_Blautia Genus	seq_770_Erysipelatoclostridium Genus	seq_866_Granulicatella Genus	seq_987_Lactonifactor Genus	seq_992_Anaerofustis Genus	seq_112_pectinilyticus	seq_59_caccae	seq_129_wadsworthia	seq_426_Coriobacteriales Incertae Sedis Family
3-hydroxysebacate	slow	negative	seq_14_Bacteroides Genus	seq_489_faecihominis	seq_240_Oscillospiraceae Family	seq_166_Lachnoclostridium Genus	seq_487_Lachnospiraceae UCG-009 Genus	seq_62_Odoribacter Genus	seq_122_Lachnoclostridium Genus	seq_131_glucerasea	seq_890_Firmicutes Phylum
3-hydroxysuberate	slow	negative	seq_62_Odoribacter Genus	seq_240_Oscillospiraceae Family	seq_166_Lachnoclostridium Genus	seq_487_Lachnospiraceae UCG-009 Genus	seq_145_laneus	seq_52_Lachnoclostridium Genus	seq_3_muciniphila	seq_323_Lachnospiraceae NK4A136 group Genus	seq_523_Clostridia Class	seq_116_Oscillibacter Genus	seq_14_Bacteroides Genus	seq_108_Lachnoclostridium Genus	seq_122_Lachnoclostridium Genus	seq_25_Anaeroplasma Genus	seq_315_Lachnoclostridium Genus	seq_262_GCA-900066575 Genus
4-acetamidobutanoate	slow	negative	seq_14_Bacteroides Genus	seq_129_wadsworthia	seq_112_pectinilyticus	seq_92_Lachnoclostridium Genus	seq_25_Anaeroplasma Genus	seq_556_Intestinimonas Genus	seq_612_[Eubacterium] brachy group Genus	seq_620_massiliensis	seq_870_Family XIII AD3011 group Genus	seq_489_faecihominis	seq_553_Paraprevotella Genus	seq_757_Eubacterium Genus	seq_772_Gordonibacter Genus	seq_131_glucerasea	seq_704_Hydrogenoanaerobacterium Family	seq_427_Peptococcaceae Family	seq_1013_NK4A214 group Genus	seq_640_Incertae Sedis Genus	seq_821_GCA-900066575 Genus	seq_664_Blautia Genus	seq_770_Erysipelatoclostridium Genus	seq_866_Granulicatella Genus	seq_987_Lactonifactor Genus	seq_992_Anaerofustis Genus	seq_122_Lachnoclostridium Genus
5-hydroxyindoleacetate	slow	negative	seq_303_Clostridium sensu stricto 1 Genus	seq_543_Candidatus Stoquefichus Genus	seq_641_Faecalitalea Genus	seq_703_DTU089 Genus	seq_874_pectinoschiza	seq_747_odontolyticus	seq_416_[Eubacterium] coprostanoligenes group Family	seq_103_Methanobrevibacter Genus	seq_1013_NK4A214 group Genus	seq_640_Incertae Sedis Genus	seq_821_GCA-900066575 Genus	seq_664_Blautia Genus	seq_770_Erysipelatoclostridium Genus	seq_866_Granulicatella Genus	seq_987_Lactonifactor Genus	seq_992_Anaerofustis Genus	seq_273_invisus	seq_420_bartlettii	seq_73_CAG-352 Genus	seq_96_ramosum	seq_403_[Ruminococcus] torques group Genus	seq_112_pectinilyticus
enterodiol	slow	negative	seq_486_[Ruminococcus] torques group Genus	seq_520_CAG-56 Genus	seq_791_Frisingicoccus Genus	seq_644_bacterium	seq_148_comes	seq_244_inulinivorans	seq_571_Erysipelatoclostridium Genus	seq_558_Lachnospiraceae NK4A136 group Genus	seq_371_hominis	seq_408_Streptococcus Genus	seq_200_Incertae Sedis Genus	seq_187_[Eubacterium] hallii group Genus	seq_426_Coriobacteriales Incertae Sedis Family	seq_57_Agathobacter Genus	seq_1013_NK4A214 group Genus	seq_640_Incertae Sedis Genus	seq_821_GCA-900066575 Genus	seq_664_Blautia Genus	seq_770_Erysipelatoclostridium Genus	seq_866_Granulicatella Genus	seq_987_Lactonifactor Genus	seq_992_Anaerofustis Genus	seq_365_Bifidobacterium Genus	seq_370_[Ruminococcus] torques group Genus	seq_445_Lachnospiraceae UCG-001 Genus	seq_516_prausnitzii	seq_525_[Eubacterium] eligens group Genus	seq_551_[Eubacterium] eligens group Genus	seq_561_intestini	seq_581_Marvinbryantia Genus	seq_598_Butyricicoccus Genus	seq_608_Lachnoclostridium Genus	seq_648_Lachnospira Genus	seq_720_Lachnospiraceae Family	seq_816_NK4A214 group Genus	seq_819_Lachnospiraceae UCG-004 Genus	seq_848_isoflavoniconvertens	seq_473_Roseburia Genus	seq_732_Gemella Genus	seq_164_prausnitzii	seq_694_Lachnoclostridium Genus	seq_779_Colidextribacter Genus	seq_247_aerofaciens	seq_484_Lachnoclostridium Genus	seq_301_Monoglobus Genus	seq_661_[Clostridium] methylpentosum group Family
glycerol 3-phosphate	slow	negative	seq_62_Odoribacter Genus	seq_145_laneus	seq_52_Lachnoclostridium Genus	seq_3_muciniphila	seq_15_Alistipes Genus	seq_146_Ruminococcaceae Family	seq_108_Lachnoclostridium Genus	seq_240_Oscillospiraceae Family	seq_10_caccae	seq_166_Lachnoclostridium Genus	seq_487_Lachnospiraceae UCG-009 Genus	seq_350_DTU089 Genus	seq_97_longoviformis	seq_395_caecimuris	seq_315_Lachnoclostridium Genus	seq_262_GCA-900066575 Genus	seq_227_Tuzzerella Genus	seq_323_Lachnospiraceae NK4A136 group Genus	seq_523_Clostridia Class	seq_261_Butyricimonas Genus	seq_353_Lachnospiraceae Family	seq_96_ramosum	seq_248_UBA1819 Genus	seq_190_Romboutsia Genus
guanidinoacetate	slow	negative	seq_227_Tuzzerella Genus	seq_191_Agathobacter Genus	seq_74_Faecalibacterium Genus	seq_651_Family XIII AD3011 group Genus	seq_371_hominis	seq_408_Streptococcus Genus	seq_200_Incertae Sedis Genus	seq_187_[Eubacterium] hallii group Genus	seq_103_Methanobrevibacter Genus	seq_747_odontolyticus	seq_22_Blautia Genus	seq_119_Streptococcus Genus	seq_299_catus	seq_190_Romboutsia Genus	seq_115_obeum	seq_301_Monoglobus Genus	seq_80_faecis	seq_148_comes	seq_244_inulinivorans	seq_571_Erysipelatoclostridium Genus	seq_791_Frisingicoccus Genus	seq_184_Bifidobacterium Genus	seq_486_[Ruminococcus] torques group Genus	seq_520_CAG-56 Genus	seq_644_bacterium	seq_558_Lachnospiraceae NK4A136 group Genus	seq_473_Roseburia Genus	seq_732_Gemella Genus	seq_164_prausnitzii	seq_694_Lachnoclostridium Genus	seq_484_Lachnoclostridium Genus	seq_661_[Clostridium] methylpentosum group Family	seq_303_Clostridium sensu stricto 1 Genus	seq_703_DTU089 Genus	seq_543_Candidatus Stoquefichus Genus	seq_641_Faecalitalea Genus	seq_874_pectinoschiza	seq_8_Lactobacillus Genus	seq_856_Lactococcus Genus	seq_215_bicirculans	seq_167_caecimuris	seq_109_massiliensis	seq_338_UCG-002 Genus	seq_180_hadrus	seq_207_[Eubacterium] hallii group Genus	seq_57_Agathobacter Genus	seq_268_Subdoligranulum Genus
histamine	slow	negative	seq_59_caccae	seq_14_Bacteroides Genus	seq_575_GCA-900066755 Genus	seq_25_Anaeroplasma Genus	seq_112_pectinilyticus	seq_704_Hydrogenoanaerobacterium Family	seq_427_Peptococcaceae Family	seq_116_Oscillibacter Genus	seq_131_glucerasea	seq_471_Christensenellaceae R-7 group Genus	seq_500_Lachnospiraceae UCG-002 Genus	seq_659_Lachnospiraceae Family	seq_678_Lachnospiraceae Family	seq_781_Paludicola Genus	seq_228_Bacteroides Genus	seq_233_[Eubacterium] xylanophilum group Genus	seq_665_Ruminococcaceae Family	seq_76_nordii	seq_622_hathewayi	seq_890_Firmicutes Phylum	seq_212_Lachnospiraceae Family	seq_556_Intestinimonas Genus	seq_612_[Eubacterium] brachy group Genus	seq_935_Papillibacter Genus	seq_129_wadsworthia	seq_430_Paludicola Genus	seq_772_Gordonibacter Genus	seq_620_massiliensis	seq_870_Family XIII AD3011 group Genus	seq_426_Coriobacteriales Incertae Sedis Family
N-acetylhistamine	slow	negative	seq_14_Bacteroides Genus	seq_131_glucerasea	seq_704_Hydrogenoanaerobacterium Family	seq_427_Peptococcaceae Family	seq_116_Oscillibacter Genus	seq_575_GCA-900066755 Genus	seq_890_Firmicutes Phylum	seq_25_Anaeroplasma Genus	seq_59_caccae	seq_112_pectinilyticus	seq_500_Lachnospiraceae UCG-002 Genus	seq_659_Lachnospiraceae Family	seq_678_Lachnospiraceae Family	seq_781_Paludicola Genus	seq_471_Christensenellaceae R-7 group Genus	seq_233_[Eubacterium] xylanophilum group Genus	seq_228_Bacteroides Genus	seq_665_Ruminococcaceae Family	seq_76_nordii	seq_620_massiliensis	seq_870_Family XIII AD3011 group Genus	seq_772_Gordonibacter Genus	seq_622_hathewayi	seq_386_Ruminococcus Genus	seq_766_Lachnospiraceae Family	seq_798_Lachnospiraceae FE2018 group Genus	seq_750_Christensenellaceae R-7 group Genus	seq_212_Lachnospiraceae Family	seq_935_Papillibacter Genus	seq_556_Intestinimonas Genus	seq_612_[Eubacterium] brachy group Genus	seq_122_Lachnoclostridium Genus	seq_837_Anaerofilum Genus	seq_77_Oscillospiraceae Family	seq_430_Paludicola Genus
N-palmitoyl-sphinganine (d18:0/16:0)	slow	negative	seq_15_Alistipes Genus	seq_164_prausnitzii	seq_484_Lachnoclostridium Genus	seq_433_Incertae Sedis Genus	seq_145_laneus	seq_52_Lachnoclostridium Genus	seq_62_Odoribacter Genus	seq_128_Oscillibacter Genus	seq_146_Ruminococcaceae Family	seq_445_Lachnospiraceae UCG-001 Genus	seq_516_prausnitzii	seq_525_[Eubacterium] eligens group Genus	seq_648_Lachnospira Genus	seq_720_Lachnospiraceae Family	seq_365_Bifidobacterium Genus	seq_370_[Ruminococcus] torques group Genus	seq_551_[Eubacterium] eligens group Genus	seq_581_Marvinbryantia Genus	seq_108_Lachnoclostridium Genus	seq_187_[Eubacterium] hallii group Genus	seq_371_hominis	seq_499_Catenibacillus Genus	seq_505_Streptococcus Genus	seq_568_Lachnoclostridium Genus	seq_262_GCA-900066575 Genus	seq_404_NK4A214 group Genus	seq_454_prausnitzii	seq_504_UCG-005 Genus	seq_514_UCG-002 Genus	seq_839_Intestinimonas Genus	seq_946_Angelakisella Genus	seq_200_Incertae Sedis Genus	seq_408_Streptococcus Genus
octadecenedioate (C18:1-DC)	slow	negative	seq_145_laneus	seq_52_Lachnoclostridium Genus	seq_350_DTU089 Genus	seq_404_NK4A214 group Genus	seq_454_prausnitzii	seq_504_UCG-005 Genus	seq_514_UCG-002 Genus	seq_839_Intestinimonas Genus	seq_946_Angelakisella Genus	seq_146_Ruminococcaceae Family	seq_505_Streptococcus Genus	seq_568_Lachnoclostridium Genus	seq_108_Lachnoclostridium Genus	seq_15_Alistipes Genus	seq_398_faecium	seq_262_GCA-900066575 Genus	seq_192_Clostridia vadinBB60 group Order
[truncated: 46 more columns]
