# Supplementary material for: The gut microbiota modulates the rate of ALS progression
Source: Research Square preprint supplement (doi:10.21203/rs.3.rs-6370840/v1), 2025-04-17
Supplement: Supplementary file 2 [file 3ea86dd67717b91916a96b9a.xlsx]

## Sheet: pangenome-gene-clusters-summary
Extended data Table 5. Gene clusters identified in the pangenome of P. vulgatus isolates
unique_id	gene_cluster_id	bin_name	genome_name	gene_callers_id	num_genomes_gene_cluster_has_hits	num_genes_in_gene_cluster	max_num_paralogs	SCG	functional_homogeneity_index	geometric_homogeneity_index	combined_homogeneity_index	COG20_FUNCTION_ACC	COG20_FUNCTION	COG20_PATHWAY_ACC	COG20_PATHWAY	COG20_CATEGORY_ACC	COG20_CATEGORY	aa_sequence
4064	GC_00000572		PV10SA01	2061	5	5	1	1	1	1	1	COG5016	Pyruvate/oxaloacetate carboxyltransferase (OadA1) (PDB:2NX9) (PUBMED:18681940)	COG5016	Urea cycle	C	Energy production and conversion	MKKEIKFSLVYRDMWQSSGKYQPRADQLAKIAPLIVEMGCFARVETNGGAFEQVNLLYGENPNKAVRTFTKPLREAGIQTHMLDRGLNALRMYPVPADVRRLMYRVKHAQGVDITRIFCGLNEVRNIIPSIKYAKEAGMIPQATLCITYSPVHTVDYYSYIADQLIEAGAPEICLKDMAGIGRPEMLGQLVRNIKDKHPEVIVQYHGHSGPGLSMASILEVCENGADIIDVAMEPLSWGKVHPDVISVQAMLKNAGFQVPEINMKAYMKARSMTQEFIDDFLGYFIDPTNKHMSSLLLGCGLPGGMMGSMMADLKGVHSGINLILKGQGKEPMSLDDLVVMLFEEVEYVWPKLGYPPLVTPFSQYVKNVALMNVMQLVKGEERWTMIDNHTWDMILGKS…
4065	GC_00000572		PV26FA01	4002	5	5	1	1	1	1	1	COG5016	Pyruvate/oxaloacetate carboxyltransferase (OadA1) (PDB:2NX9) (PUBMED:18681940)	COG5016	Urea cycle	C	Energy production and conversion	MKKEIKFSLVYRDMWQSSGKYQPRADQLAKIAPLIVEMGCFARVETNGGAFEQVNLLYGENPNKAVRTFTKPLREAGIQTHMLDRGLNALRMYPVPADVRRLMYRVKHAQGVDITRIFCGLNEVRNIIPSIKYAKEAGMIPQATLCITYSPVHTVDYYSYIADQLIEAGAPEICLKDMAGIGRPEMLGQLVRNIKDKHPEVIVQYHGHSGPGLSMASILEVCENGADIIDVAMEPLSWGKVHPDVISVQAMLKNAGFQVPEINMKAYMKARSMTQEFIDDFLGYFIDPTNKHMSSLLLGCGLPGGMMGSMMADLKGVHSGINLILKGQGKEPMSLDDLVVMLFEEVEYVWPKLGYPPLVTPFSQYVKNVALMNVMQLVKGEERWTMIDNHTWDMILGKS…
4066	GC_00000572		PV29FA01	1335	5	5	1	1	1	1	1	COG5016	Pyruvate/oxaloacetate carboxyltransferase (OadA1) (PDB:2NX9) (PUBMED:18681940)	COG5016	Urea cycle	C	Energy production and conversion	MKKEIKFSLVYRDMWQSSGKYQPRADQLAKIAPLIVEMGCFARVETNGGAFEQVNLLYGENPNKAVRTFTKPLREAGIQTHMLDRGLNALRMYPVPADVRRLMYRVKHAQGVDITRIFCGLNEVRNIIPSIKYAKEAGMIPQATLCITYSPVHTVDYYSYIADQLIEAGAPEICLKDMAGIGRPEMLGQLVRNIKDKHPEVIVQYHGHSGPGLSMASILEVCENGADIIDVAMEPLSWGKVHPDVISVQAMLKNAGFQVPEINMKAYMKARSMTQEFIDDFLGYFIDPTNKHMSSLLLGCGLPGGMMGSMMADLKGVHSGINLILKGQGKEPMSLDDLVVMLFEEVEYVWPKLGYPPLVTPFSQYVKNVALMNVMQLVKGEERWTMIDNHTWDMILGKS…
4067	GC_00000572		PV2SA01	1556	5	5	1	1	1	1	1	COG5016	Pyruvate/oxaloacetate carboxyltransferase (OadA1) (PDB:2NX9) (PUBMED:18681940)	COG5016	Urea cycle	C	Energy production and conversion	MKKEIKFSLVYRDMWQSSGKYQPRADQLAKIAPLIVEMGCFARVETNGGAFEQVNLLYGENPNKAVRTFTKPLREAGIQTHMLDRGLNALRMYPVPADVRRLMYRVKHAQGVDITRIFCGLNEVRNIIPSIKYAKEAGMIPQATLCITYSPVHTVDYYSYIADQLIEAGAPEICLKDMAGIGRPEMLGQLVRNIKDKHPEVIVQYHGHSGPGLSMASILEVCENGADIIDVAMEPLSWGKVHPDVISVQAMLKNAGFQVPEINMKAYMKARSMTQEFIDDFLGYFIDPTNKHMSSLLLGCGLPGGMMGSMMADLKGVHSGINLILKGQGKEPMSLDDLVVMLFEEVEYVWPKLGYPPLVTPFSQYVKNVALMNVMQLVKGEERWTMIDNHTWDMILGKS…
4068	GC_00000572		PV2SA02	2231	5	5	1	1	1	1	1	COG5016	Pyruvate/oxaloacetate carboxyltransferase (OadA1) (PDB:2NX9) (PUBMED:18681940)	COG5016	Urea cycle	C	Energy production and conversion	MKKEIKFSLVYRDMWQSSGKYQPRADQLAKIAPLIVEMGCFARVETNGGAFEQVNLLYGENPNKAVRTFTKPLREAGIQTHMLDRGLNALRMYPVPADVRRLMYRVKHAQGVDITRIFCGLNEVRNIIPSIKYAKEAGMIPQATLCITYSPVHTVDYYSYIADQLIEAGAPEICLKDMAGIGRPEMLGQLVRNIKDKHPEVIVQYHGHSGPGLSMASILEVCENGADIIDVAMEPLSWGKVHPDVISVQAMLKNAGFQVPEINMKAYMKARSMTQEFIDDFLGYFIDPTNKHMSSLLLGCGLPGGMMGSMMADLKGVHSGINLILKGQGKEPMSLDDLVVMLFEEVEYVWPKLGYPPLVTPFSQYVKNVALMNVMQLVKGEERWTMIDNHTWDMILGKS…
6504	GC_00001062		PV10SA01	1603	5	5	1	1	1	1	1	COG4660	Na+-translocating ferredoxin:NAD+ oxidoreductase RNF, RnfE subunit (RnfE)	COG4660	Na+-translocating Fd:NADH oxidoreductase	C	Energy production and conversion	MNNFKVLMNGIVKENPTFVLLLGMCPTLGTTSSAINGMGMGLATMFVLICSNVVISSIKNLIPDMVRIPAFIVVIASFVTLLQMIMQAYVPALYATLGLFIPLIVVNCILLGRAEAFAAKNGPVPSFFDGLGMGLGFTLALTILGGVREFLGTGKLFDIAIMPEQYGMLIFVLAPGAFIALGYLIAIVNKLKKA
6505	GC_00001062		PV26FA01	431	5	5	1	1	1	1	1	COG4660	Na+-translocating ferredoxin:NAD+ oxidoreductase RNF, RnfE subunit (RnfE)	COG4660	Na+-translocating Fd:NADH oxidoreductase	C	Energy production and conversion	MNNFKVLMNGIVKENPTFVLLLGMCPTLGTTSSAINGMGMGLATMFVLICSNVVISSIKNLIPDMVRIPAFIVVIASFVTLLQMIMQAYVPALYATLGLFIPLIVVNCILLGRAEAFAAKNGPVPSFFDGLGMGLGFTLALTILGGVREFLGTGKLFDIAIMPEQYGMLIFVLAPGAFIALGYLIAIVNKLKKA
6506	GC_00001062		PV29FA01	1925	5	5	1	1	1	1	1	COG4660	Na+-translocating ferredoxin:NAD+ oxidoreductase RNF, RnfE subunit (RnfE)	COG4660	Na+-translocating Fd:NADH oxidoreductase	C	Energy production and conversion	MNNFKVLMNGIVKENPTFVLLLGMCPTLGTTSSAINGMGMGLATMFVLICSNVVISSIKNLIPDMVRIPAFIVVIASFVTLLQMIMQAYVPALYATLGLFIPLIVVNCILLGRAEAFAAKNGPVPSFFDGLGMGLGFTLALTILGGVREFLGTGKLFDIAIMPEQYGMLIFVLAPGAFIALGYLIAIVNKLKKA
6507	GC_00001062		PV2SA01	994	5	5	1	1	1	1	1	COG4660	Na+-translocating ferredoxin:NAD+ oxidoreductase RNF, RnfE subunit (RnfE)	COG4660	Na+-translocating Fd:NADH oxidoreductase	C	Energy production and conversion	MNNFKVLMNGIVKENPTFVLLLGMCPTLGTTSSAINGMGMGLATMFVLICSNVVISSIKNLIPDMVRIPAFIVVIASFVTLLQMIMQAYVPALYATLGLFIPLIVVNCILLGRAEAFAAKNGPVPSFFDGLGMGLGFTLALTILGGVREFLGTGKLFDIAIMPEQYGMLIFVLAPGAFIALGYLIAIVNKLKKA
6508	GC_00001062		PV2SA02	1669	5	5	1	1	1	1	1	COG4660	Na+-translocating ferredoxin:NAD+ oxidoreductase RNF, RnfE subunit (RnfE)	COG4660	Na+-translocating Fd:NADH oxidoreductase	C	Energy production and conversion	MNNFKVLMNGIVKENPTFVLLLGMCPTLGTTSSAINGMGMGLATMFVLICSNVVISSIKNLIPDMVRIPAFIVVIASFVTLLQMIMQAYVPALYATLGLFIPLIVVNCILLGRAEAFAAKNGPVPSFFDGLGMGLGFTLALTILGGVREFLGTGKLFDIAIMPEQYGMLIFVLAPGAFIALGYLIAIVNKLKKA
10464	GC_00001854		PV10SA01	1602	5	5	1	1	0.996212	1	0.998102	COG4659	Na+-translocating ferredoxin:NAD+ oxidoreductase RNF, RnfG subunit (RnfG)	COG4659	Na+-translocating Fd:NADH oxidoreductase	C	Energy production and conversion	MKKLESSLKNMVIVLTGVTVVAGALLGYVNELTKEPIAQANAKALSDAIAIVVPGFDNNPAEAPETIELEGVTYKIYKATKGGEFIGAAVESSANGFGGALNVLVGFDKEGNIIDYSLLSHAETPGLGSKAADWFKKGGKGDITGMNPGQKALVVNKDGGQIDAITASTITTRAFLKAVNNAYAAYSGQNVDGSSGATQQVSETAADDPKAAKTQCEGTQDCCGQACDSAACKAACGGKCDPANCDKADCKKAECPKQDCKNKK
10465	GC_00001854		PV26FA01	432	5	5	1	1	0.996212	1	0.998102	COG4659	Na+-translocating ferredoxin:NAD+ oxidoreductase RNF, RnfG subunit (RnfG)	COG4659	Na+-translocating Fd:NADH oxidoreductase	C	Energy production and conversion	MKKLESSLKNMVIVLTGVTVVAGALLGYVNELTKEPIAQANAKALSDAIAIVVPGFDNNPAEAPETIELEGVTYKIYKATKGGEFIGAAVESSANGFGGALNVLVGFDKEGNIIDYSLLSHAETPGLGSKAADWFKKGGKGDITGMNPGQKALVVNKDGGQIDAITASTITTRAFLKAVNNAYAAYSGQNVDGSSGATQQVSETAADAPKAAKAQCEGTQDCCGQACDSAACKAACGGKCDPANCDKADCKKAECPKQDCKNKK
10466	GC_00001854		PV29FA01	1926	5	5	1	1	0.996212	1	0.998102	COG4659	Na+-translocating ferredoxin:NAD+ oxidoreductase RNF, RnfG subunit (RnfG)	COG4659	Na+-translocating Fd:NADH oxidoreductase	C	Energy production and conversion	MKKLESSLKNMVIVLTGVTVVAGALLGYVNELTKEPIAQANAKALSDAIAIVVPGFDNNPAEAPETIELEGVTYKIYKATKGGEFIGAAVESSANGFGGALNVLVGFDKEGNIIDYSLLSHAETPGLGSKAADWFKKGGKGDITGMNPGQKALVVNKDGGQIDAITASTITTRAFLKAVNNAYAAYSGQNVDGSSGATQQVSETAADDPKAAKAQCEGTQDCCGQACDSAACKAACGGKCDPANCDKADCKKAECPKQDCKNKK
10467	GC_00001854		PV2SA01	993	5	5	1	1	0.996212	1	0.998102	COG4659	Na+-translocating ferredoxin:NAD+ oxidoreductase RNF, RnfG subunit (RnfG)	COG4659	Na+-translocating Fd:NADH oxidoreductase	C	Energy production and conversion	MKKLESSLKNMVIVLTGVTVVAGALLGYVNELTKEPIAQANAKALSDAIAIVVPGFDNNPAEAPETIELEGVTYKIYKATKGGEFIGAAVESSANGFGGALNVLVGFDKEGNIIDYSLLSHAETPGLGSKAADWFKKGGKGDITGMNPGQKALVVNKDGGQIDAITASTITTRAFLKAVNNAYAAYSGQNVDGSSGATQQVSETAADAPKAAKAQCEGTQDCCGQACDSAACKAACGGKCDPANCDKADCKKAECPKQDCKNKK
10468	GC_00001854		PV2SA02	1668	5	5	1	1	0.996212	1	0.998102	COG4659	Na+-translocating ferredoxin:NAD+ oxidoreductase RNF, RnfG subunit (RnfG)	COG4659	Na+-translocating Fd:NADH oxidoreductase	C	Energy production and conversion	MKKLESSLKNMVIVLTGVTVVAGALLGYVNELTKEPIAQANAKALSDAIAIVVPGFDNNPAEAPETIELEGVTYKIYKATKGGEFIGAAVESSANGFGGALNVLVGFDKEGNIIDYSLLSHAETPGLGSKAADWFKKGGKGDITGMNPGQKALVVNKDGGQIDAITASTITTRAFLKAVNNAYAAYSGQNVDGSSGATQQVSETAADAPKAAKAQCEGTQDCCGQACDSAACKAACGGKCDPANCDKADCKKAECPKQDCKNKK
8439	GC_00001449		PV10SA01	1601	5	5	1	1	0.997568	1	0.998783	COG4658	Na+-translocating ferredoxin:NAD+ oxidoreductase RNF, RnfD subunit (RnfD)	COG4658	Na+-translocating Fd:NADH oxidoreductase	C	Energy production and conversion	MANKLIVSLSPHVHSGDSIQKNMYGVLIALIPALLVSFYMFGLGAVVVTLTSVAACVFFEWAITKFILKRERSTICDGSAIITGVLLAFNLPSNLPLWIIIIGALVAIGVGKMTFGGLGCNPFNPALVGRIFLLISFPVQMTSWPLVQQWGSYTDAETGATPLALMKMAVKGDANALGQLPDTLSLFLGNNPGSLGEVSALTLLLGLGYMLWKKIISWHIPVSILVTVFVFSGLMHLVDPVAYASPLAHLFTGGLMLGAIFMATDYVTSPMTHKGMIIYGVAIGFLTVVIRLFGAYPEGMSFAIFIMNAFTPLINTYCKPKRFGEVVKK
8440	GC_00001449		PV26FA01	433	5	5	1	1	0.997568	1	0.998783	COG4658	Na+-translocating ferredoxin:NAD+ oxidoreductase RNF, RnfD subunit (RnfD)	COG4658	Na+-translocating Fd:NADH oxidoreductase	C	Energy production and conversion	MANKLIVSLSPHVHSGDSIQKNMYGVLIALIPALLVSFYMFGLGAVVVTLTSVAACVFFEWAITKFILKRERSTICDGSAIITGVLLAFNLPSNLPLWIIIIGALVAIGVGKMTFGGLGCNPFNPALVGRIFLLISFPVQMTSWPLVQQWGSYTDAETGATPLALMKMAVKGDANALGQLPDTLSLFLGNNPGSLGEVSALALLLGLGYMLWKKIISWHIPVSILVTVFVFAGLMHLVDPVAYASPLAHLFTGGLMLGAIFMATDYVTSPMTHKGMIIYGVAIGFLTVVIRLFGAYPEGMSFAIFIMNAFTPLINTYCKPKRFGEVVKK
8441	GC_00001449		PV29FA01	1927	5	5	1	1	0.997568	1	0.998783	COG4658	Na+-translocating ferredoxin:NAD+ oxidoreductase RNF, RnfD subunit (RnfD)	COG4658	Na+-translocating Fd:NADH oxidoreductase	C	Energy production and conversion	MANKLIVSLSPHVHSGDSIQKNMYGVLIALIPALLVSFYMFGLGAVVVTLTSVAACVFFEWAITKFILKRERSTICDGSAIITGVLLAFNLPSNLPLWIIIIGALVAIGVGKMTFGGLGCNPFNPALVGRIFLLISFPVQMTSWPLVQQWGSYTDAETGATPLALMKMAVKGDANALGQLPDTLSLFLGNNPGSLGEVSALALLLGLGYMLWKKIISWHIPVSILVTVFVFAGLMHLVDPVAYASPLAHLFTGGLMLGAIFMATDYVTSPMTHKGMIIYGVAIGFLTVVIRLFGAYPEGMSFAIFIMNAFTPLINTYCKPKRFGEVVKK
8442	GC_00001449		PV2SA01	992	5	5	1	1	0.997568	1	0.998783	COG4658	Na+-translocating ferredoxin:NAD+ oxidoreductase RNF, RnfD subunit (RnfD)	COG4658	Na+-translocating Fd:NADH oxidoreductase	C	Energy production and conversion	MANKLIVSLSPHVHSGDSIQKNMYGVLIALIPALLVSFYMFGLGAVVVTLTSVAACVFFEWAITKFILKRERSTICDGSAIITGVLLAFNLPSNLPLWIIIIGALVAIGVGKMTFGGLGCNPFNPALVGRIFLLISFPVQMTSWPLVQQWGSYTDAETGATPLALMKMAVKGDANALGQLPDTLSLFLGNNPGSLGEVSALALLLGLGYMLWKKIISWHIPVSILVTVFVFAGLMHLVDPVAYASPLAHLFTGGLMLGAIFMATDYVTSPMTHKGMIIYGVAIGFLTVVIRLFGAYPEGMSFAIFIMNAFTPLINTYCKPKRFGEVVKK
8443	GC_00001449		PV2SA02	1667	5	5	1	1	0.997568	1	0.998783	COG4658	Na+-translocating ferredoxin:NAD+ oxidoreductase RNF, RnfD subunit (RnfD)	COG4658	Na+-translocating Fd:NADH oxidoreductase	C	Energy production and conversion	MANKLIVSLSPHVHSGDSIQKNMYGVLIALIPALLVSFYMFGLGAVVVTLTSVAACVFFEWAITKFILKRERSTICDGSAIITGVLLAFNLPSNLPLWIIIIGALVAIGVGKMTFGGLGCNPFNPALVGRIFLLISFPVQMTSWPLVQQWGSYTDAETGATPLALMKMAVKGDANALGQLPDTLSLFLGNNPGSLGEVSALALLLGLGYMLWKKIISWHIPVSILVTVFVFAGLMHLVDPVAYASPLAHLFTGGLMLGAIFMATDYVTSPMTHKGMIIYGVAIGFLTVVIRLFGAYPEGMSFAIFIMNAFTPLINTYCKPKRFGEVVKK
4969	GC_00000753		PV10SA01	1604	5	5	1	1	1	1	1	COG4657	Na+-translocating ferredoxin:NAD+ oxidoreductase RNF, RnfA subunit (RnfA)	COG4657	Na+-translocating Fd:NADH oxidoreductase	C	Energy production and conversion	MEYILIFITAIFVNNIVLSQFLGICPFLGVSKKVETATGMGAAVAFVLTIATIVTYLIQKFVLDAFGLEYLQTIAFILVIAALVQMVEIILKKVSPALYQALGVFLPLITTNCCILGVAILVIQKDFDLLTGVVYAFSTALGFALAMVLFAGIREQLSLVNIPKGMQGMAIALVTAGLLAMAFMGFSGVDKGLGVLFGIE
4970	GC_00000753		PV26FA01	430	5	5	1	1	1	1	1	COG4657	Na+-translocating ferredoxin:NAD+ oxidoreductase RNF, RnfA subunit (RnfA)	COG4657	Na+-translocating Fd:NADH oxidoreductase	C	Energy production and conversion	MEYILIFITAIFVNNIVLSQFLGICPFLGVSKKVETATGMGAAVAFVLTIATIVTYLIQKFVLDAFGLEYLQTIAFILVIAALVQMVEIILKKVSPALYQALGVFLPLITTNCCILGVAILVIQKDFDLLTGVVYAFSTALGFALAMVLFAGIREQLSLVNIPKGMQGMAIALVTAGLLAMAFMGFSGVDKGLGVLFGIE
4971	GC_00000753		PV29FA01	1924	5	5	1	1	1	1	1	COG4657	Na+-translocating ferredoxin:NAD+ oxidoreductase RNF, RnfA subunit (RnfA)	COG4657	Na+-translocating Fd:NADH oxidoreductase	C	Energy production and conversion	MEYILIFITAIFVNNIVLSQFLGICPFLGVSKKVETATGMGAAVAFVLTIATIVTYLIQKFVLDAFGLEYLQTIAFILVIAALVQMVEIILKKVSPALYQALGVFLPLITTNCCILGVAILVIQKDFDLLTGVVYAFSTALGFALAMVLFAGIREQLSLVNIPKGMQGMAIALVTAGLLAMAFMGFSGVDKGLGVLFGIE
4972	GC_00000753		PV2SA01	995	5	5	1	1	1	1	1	COG4657	Na+-translocating ferredoxin:NAD+ oxidoreductase RNF, RnfA subunit (RnfA)	COG4657	Na+-translocating Fd:NADH oxidoreductase	C	Energy production and conversion	MEYILIFITAIFVNNIVLSQFLGICPFLGVSKKVETATGMGAAVAFVLTIATIVTYLIQKFVLDAFGLEYLQTIAFILVIAALVQMVEIILKKVSPALYQALGVFLPLITTNCCILGVAILVIQKDFDLLTGVVYAFSTALGFALAMVLFAGIREQLSLVNIPKGMQGMAIALVTAGLLAMAFMGFSGVDKGLGVLFGIE
4973	GC_00000753		PV2SA02	1670	5	5	1	1	1	1	1	COG4657	Na+-translocating ferredoxin:NAD+ oxidoreductase RNF, RnfA subunit (RnfA)	COG4657	Na+-translocating Fd:NADH oxidoreductase	C	Energy production and conversion	MEYILIFITAIFVNNIVLSQFLGICPFLGVSKKVETATGMGAAVAFVLTIATIVTYLIQKFVLDAFGLEYLQTIAFILVIAALVQMVEIILKKVSPALYQALGVFLPLITTNCCILGVAILVIQKDFDLLTGVVYAFSTALGFALAMVLFAGIREQLSLVNIPKGMQGMAIALVTAGLLAMAFMGFSGVDKGLGVLFGIE
3974	GC_00000554		PV10SA01	1600	5	5	1	1	1	1	1	COG4656	Na+-translocating ferredoxin:NAD+ oxidoreductase RNF, RnfC subunit (RnfC)	COG4656	Na+-translocating Fd:NADH oxidoreductase	C	Energy production and conversion	MKTFRIGGVHPAENKLSAGKAIETLALPKQAVFPLSQHIGAPATAIVKKGDVVKVGTKIAEAGGFVSAAIFSSVSGKVNKVDAVIDASGYRKPAIFIDVDGDEWEESIDRSSTLVKECALTPEEIVAKVKNAGVVGMGGACFPTHVKLSPPPGCKAECVIINAVECEPYLTADHRLMLEKADEVLVGVSILMKAAKVTKGYIGIENNKPDAIKLMTEKAAQYPGIEVVPLQVKYPQGGEKQLIDAVIGRQVPAPPAIPINVGAVVQNVGTAFAVYEAVQKNKPLFERIVTVTGKSVKNPSNFLTRMGTPMSQLIDAAGGLPEDTGKVIGGGPMMGKALVNTEVPICKGSSGVLIMNDKEAARAEAQPCIRCAKCVSVCPMGLEPFLLATLSAHKDWERV…
3975	GC_00000554		PV26FA01	434	5	5	1	1	1	1	1	COG4656	Na+-translocating ferredoxin:NAD+ oxidoreductase RNF, RnfC subunit (RnfC)	COG4656	Na+-translocating Fd:NADH oxidoreductase	C	Energy production and conversion	MKTFRIGGVHPAENKLSAGKAIETLALPKQAVFPLSQHIGAPATAIVKKGDVVKVGTKIAEAGGFVSAAIFSSVSGKVNKVDAVIDASGYRKPAIFIDVDGDEWEESIDRSSTLVKECALTPEEIVAKVKNAGVVGMGGACFPTHVKLSPPPGCKAECVIINAVECEPYLTADHRLMLEKADEVLVGVSILMKAAKVTKGYIGIENNKPDAIKLMTEKAAQYPGIEVVPLQVKYPQGGEKQLIDAVIGRQVPAPPAIPINVGAVVQNVGTAFAVYEAVQKNKPLFERIVTVTGKSVKNPSNFLTRMGTPMSQLIDAAGGLPEDTGKVIGGGPMMGKALVNTEVPICKGSSGVLIMNDKEAARAEAQPCIRCAKCVSVCPMGLEPFLLATLSAHKDWERV…
3976	GC_00000554		PV29FA01	1928	5	5	1	1	1	1	1	COG4656	Na+-translocating ferredoxin:NAD+ oxidoreductase RNF, RnfC subunit (RnfC)	COG4656	Na+-translocating Fd:NADH oxidoreductase	C	Energy production and conversion	MKTFRIGGVHPAENKLSAGKAIETLALPKQAVFPLSQHIGAPATAIVKKGDVVKVGTKIAEAGGFVSAAIFSSVSGKVNKVDAVIDASGYRKPAIFIDVDGDEWEESIDRSSTLVKECALTPEEIVAKVKNAGVVGMGGACFPTHVKLSPPPGCKAECVIINAVECEPYLTADHRLMLEKADEVLVGVSILMKAAKVTKGYIGIENNKPDAIKLMTEKAAQYPGIEVVPLQVKYPQGGEKQLIDAVIGRQVPAPPAIPINVGAVVQNVGTAFAVYEAVQKNKPLFERIVTVTGKSVKNPSNFLTRMGTPMSQLIDAAGGLPEDTGKVIGGGPMMGKALVNTEVPICKGSSGVLIMNDKEAARAEAQPCIRCAKCVSVCPMGLEPFLLATLSAHKDWERV…
3977	GC_00000554		PV2SA01	991	5	5	1	1	1	1	1	COG4656	Na+-translocating ferredoxin:NAD+ oxidoreductase RNF, RnfC subunit (RnfC)	COG4656	Na+-translocating Fd:NADH oxidoreductase	C	Energy production and conversion	MKTFRIGGVHPAENKLSAGKAIETLALPKQAVFPLSQHIGAPATAIVKKGDVVKVGTKIAEAGGFVSAAIFSSVSGKVNKVDAVIDASGYRKPAIFIDVDGDEWEESIDRSSTLVKECALTPEEIVAKVKNAGVVGMGGACFPTHVKLSPPPGCKAECVIINAVECEPYLTADHRLMLEKADEVLVGVSILMKAAKVTKGYIGIENNKPDAIKLMTEKAAQYPGIEVVPLQVKYPQGGEKQLIDAVIGRQVPAPPAIPINVGAVVQNVGTAFAVYEAVQKNKPLFERIVTVTGKSVKNPSNFLTRMGTPMSQLIDAAGGLPEDTGKVIGGGPMMGKALVNTEVPICKGSSGVLIMNDKEAARAEAQPCIRCAKCVSVCPMGLEPFLLATLSAHKDWERV…
3978	GC_00000554		PV2SA02	1666	5	5	1	1	1	1	1	COG4656	Na+-translocating ferredoxin:NAD+ oxidoreductase RNF, RnfC subunit (RnfC)	COG4656	Na+-translocating Fd:NADH oxidoreductase	C	Energy production and conversion	MKTFRIGGVHPAENKLSAGKAIETLALPKQAVFPLSQHIGAPATAIVKKGDVVKVGTKIAEAGGFVSAAIFSSVSGKVNKVDAVIDASGYRKPAIFIDVDGDEWEESIDRSSTLVKECALTPEEIVAKVKNAGVVGMGGACFPTHVKLSPPPGCKAECVIINAVECEPYLTADHRLMLEKADEVLVGVSILMKAAKVTKGYIGIENNKPDAIKLMTEKAAQYPGIEVVPLQVKYPQGGEKQLIDAVIGRQVPAPPAIPINVGAVVQNVGTAFAVYEAVQKNKPLFERIVTVTGKSVKNPSNFLTRMGTPMSQLIDAAGGLPEDTGKVIGGGPMMGKALVNTEVPICKGSSGVLIMNDKEAARAEAQPCIRCAKCVSVCPMGLEPFLLATLSAHKDWERV…
9439	GC_00001649		PV10SA01	3126	5	5	1	1	0.997619	1	0.998808	COG4221	NADP-dependent 3-hydroxy acid dehydrogenase YdfG (YdfG) (PDB:3P19)	COG4221	Pyrimidine degradation	C	Energy production and conversion	MDKIVFITGASSGIGAGCARKFASQGASLILNARNVNKLSALKEELEKQYGAKIYLLPFDVRDRKAATSALESLPKEWQSIDILVNNAGLVIGTDKEQEGSLDEWDIVIDTNIKALLAMTRLIVPGMVERKRGHIINIGSIAGDAAYPGGSVYCATKAAVKALSDGLRIDLVDTPLRVTNIKPGLVETNFSVVRFRGDKEKADNVYKGIRPLTGDDIAETVYFAASVPEYMQIAEMLVMPTNQATGTIVSRK
9440	GC_00001649		PV26FA01	3119	5	5	1	1	0.997619	1	0.998808	COG4221	NADP-dependent 3-hydroxy acid dehydrogenase YdfG (YdfG) (PDB:3P19)	COG4221	Pyrimidine degradation	C	Energy production and conversion	MDKIVFITGASSGIGAGCARKFASQGASLILNARNVNKLSALKEELEKQYGAKIYLLPFDVRDRKAATSALESLPKEWQSIDILVNNAGLVIGTDKEQEGSLDEWDIVIDTNIKALLAMTRLIVPGMVERKRGHIINIGSIAGDAAYPGGSVYCATKAAVKALSDGLRIDLVDTPLRVTNIKPGLVETNFSVVRFRGDKEKADNVYKGIRPLTGDDIAETVYFAASVPEYMQIAEMLVMPTNQATGTIVSRK
9441	GC_00001649		PV29FA01	307	5	5	1	1	0.997619	1	0.998808	COG4221	NADP-dependent 3-hydroxy acid dehydrogenase YdfG (YdfG) (PDB:3P19)	COG4221	Pyrimidine degradation	C	Energy production and conversion	MDKIVFITGASSGIGAGCARKFASQGASLILNARNVNKLSALKEELEKQYGAKIYLLPFDVRDRKAATSALESLPKEWQSIDILVNNAGLVIGTDKEQEGSLDEWDIVIDTNIKALLAMTRLIVPGMVERKRGHIINIGSIAGDAAYPGGSVYCATKAAVKALSDGLRIDLVDTPLRVTNIKPGLVETNFSVVRFRGDKEKADNVYKGIRPLTGDDIAETVYFAASVPEYMQIAEMLVMPTNQATGTIVSRK
9442	GC_00001649		PV2SA01	2294	5	5	1	1	0.997619	1	0.998808	COG4221	NADP-dependent 3-hydroxy acid dehydrogenase YdfG (YdfG) (PDB:3P19)	COG4221	Pyrimidine degradation	C	Energy production and conversion	MDKIVFITGASSGIGAGCARKFASQGASLILNARNVNKLSALKEELEKQYGAKIYLLPFDVRDRKAATSALESLPKEWQSIDILVNNAGLVIGTDKEQEGSLDEWDIVIDTNIKALLAMTRLIVPGMVERKRGHIINIGSIAGDAAYSGGSVYCATKAAVKALSDGLRIDLVDTPLRVTNIKPGLVETNFSVVRFRGDKEKADNVYKGIRPLTGDDIAETVYFAASVPEYMQIAEMLVMPTNQATGTIVSRK
9443	GC_00001649		PV2SA02	2969	5	5	1	1	0.997619	1	0.998808	COG4221	NADP-dependent 3-hydroxy acid dehydrogenase YdfG (YdfG) (PDB:3P19)	COG4221	Pyrimidine degradation	C	Energy production and conversion	MDKIVFITGASSGIGAGCARKFASQGASLILNARNVNKLSALKEELEKQYGAKIYLLPFDVRDRKAATSALESLPKEWQSIDILVNNAGLVIGTDKEQEGSLDEWDIVIDTNIKALLAMTRLIVPGMVERKRGHIINIGSIAGDAAYSGGSVYCATKAAVKALSDGLRIDLVDTPLRVTNIKPGLVETNFSVVRFRGDKEKADNVYKGIRPLTGDDIAETVYFAASVPEYMQIAEMLVMPTNQATGTIVSRK
2919	GC_00000343		PV10SA01	2170	5	5	1	1	1	1	1	COG2871	Na+-transporting NADH:ubiquinone oxidoreductase, subunit NqrF (NqrF) (PDB:4P6V)	COG2871	Na+-translocating NADH dehydrogenase	C	Energy production and conversion	MNLILASIGVFLGIILLLVVILLVAKQYLTPSGKVKITINGEKELEVEQGSTLLNTLSVNGIYLSSACGGKGSCGQCKCQVVEGGGEILPSEKGHFSRKQQQDHWRLGCQVKVKGDLGIKIDESVLGVKEWECEVISNKNVATFIKEFIVALPKGEHMDFVPGSYAQIKIPKFEMDYNKDIDKDLIGPEYLPAWEKFGLFGLKCKNTEETIRAYSMANYPAEGDRIMLTVRIATPPFKPKDQGPGFMDVNPGIASSYIFTLKPGDKVTMSGPYGDFHPIFDSKKEMIWVGGGAGMAPLRAQIMHMTKTLHTTDRELHYFYGARALNEVFYLQDFQQLEKDFPNFHFHLALDRPDPAADAAGVKYTAGFVHNVMYETYLKDHEAPEDIEYYMCGPGPMSN…
2920	GC_00000343		PV26FA01	3820	5	5	1	1	1	1	1	COG2871	Na+-transporting NADH:ubiquinone oxidoreductase, subunit NqrF (NqrF) (PDB:4P6V)	COG2871	Na+-translocating NADH dehydrogenase	C	Energy production and conversion	MNLILASIGVFLGIILLLVVILLVAKQYLTPSGKVKITINGEKELEVEQGSTLLNTLSVNGIYLSSACGGKGSCGQCKCQVVEGGGEILPSEKGHFSRKQQQDHWRLGCQVKVKGDLGIKIDESVLGVKEWECEVISNKNVATFIKEFIVALPKGEHMDFVPGSYAQIKIPKFEMDYNKDIDKDLIGPEYLPAWEKFGLFGLKCKNTEETIRAYSMANYPAEGDRIMLTVRIATPPFKPKDQGPGFMDVNPGIASSYIFTLKPGDKVTMSGPYGDFHPIFDSKKEMIWVGGGAGMAPLRAQIMHMTKTLHTTDRELHYFYGARALNEVFYLQDFQQLEKDFPNFHFHLALDRPDPAADAAGVKYTAGFVHNVMYETYLKDHEAPEDIEYYMCGPGPMSN…
2921	GC_00000343		PV29FA01	1222	5	5	1	1	1	1	1	COG2871	Na+-transporting NADH:ubiquinone oxidoreductase, subunit NqrF (NqrF) (PDB:4P6V)	COG2871	Na+-translocating NADH dehydrogenase	C	Energy production and conversion	MNLILASIGVFLGIILLLVVILLVAKQYLTPSGKVKITINGEKELEVEQGSTLLNTLSVNGIYLSSACGGKGSCGQCKCQVVEGGGEILPSEKGHFSRKQQQDHWRLGCQVKVKGDLGIKIDESVLGVKEWECEVISNKNVATFIKEFIVALPKGEHMDFVPGSYAQIKIPKFEMDYNKDIDKDLIGPEYLPAWEKFGLFGLKCKNTEETIRAYSMANYPAEGDRIMLTVRIATPPFKPKDQGPGFMDVNPGIASSYIFTLKPGDKVTMSGPYGDFHPIFDSKKEMIWVGGGAGMAPLRAQIMHMTKTLHTTDRELHYFYGARALNEVFYLQDFQQLEKDFPNFHFHLALDRPDPAADAAGVKYTAGFVHNVMYETYLKDHEAPEDIEYYMCGPGPMSN…
2922	GC_00000343		PV2SA01	1664	5	5	1	1	1	1	1	COG2871	Na+-transporting NADH:ubiquinone oxidoreductase, subunit NqrF (NqrF) (PDB:4P6V)	COG2871	Na+-translocating NADH dehydrogenase	C	Energy production and conversion	MNLILASIGVFLGIILLLVVILLVAKQYLTPSGKVKITINGEKELEVEQGSTLLNTLSVNGIYLSSACGGKGSCGQCKCQVVEGGGEILPSEKGHFSRKQQQDHWRLGCQVKVKGDLGIKIDESVLGVKEWECEVISNKNVATFIKEFIVALPKGEHMDFVPGSYAQIKIPKFEMDYNKDIDKDLIGPEYLPAWEKFGLFGLKCKNTEETIRAYSMANYPAEGDRIMLTVRIATPPFKPKDQGPGFMDVNPGIASSYIFTLKPGDKVTMSGPYGDFHPIFDSKKEMIWVGGGAGMAPLRAQIMHMTKTLHTTDRELHYFYGARALNEVFYLQDFQQLEKDFPNFHFHLALDRPDPAADAAGVKYTAGFVHNVMYETYLKDHEAPEDIEYYMCGPGPMSN…
2923	GC_00000343		PV2SA02	2339	5	5	1	1	1	1	1	COG2871	Na+-transporting NADH:ubiquinone oxidoreductase, subunit NqrF (NqrF) (PDB:4P6V)	COG2871	Na+-translocating NADH dehydrogenase	C	Energy production and conversion	MNLILASIGVFLGIILLLVVILLVAKQYLTPSGKVKITINGEKELEVEQGSTLLNTLSVNGIYLSSACGGKGSCGQCKCQVVEGGGEILPSEKGHFSRKQQQDHWRLGCQVKVKGDLGIKIDESVLGVKEWECEVISNKNVATFIKEFIVALPKGEHMDFVPGSYAQIKIPKFEMDYNKDIDKDLIGPEYLPAWEKFGLFGLKCKNTEETIRAYSMANYPAEGDRIMLTVRIATPPFKPKDQGPGFMDVNPGIASSYIFTLKPGDKVTMSGPYGDFHPIFDSKKEMIWVGGGAGMAPLRAQIMHMTKTLHTTDRELHYFYGARALNEVFYLQDFQQLEKDFPNFHFHLALDRPDPAADAAGVKYTAGFVHNVMYETYLKDHEAPEDIEYYMCGPGPMSN…
3059	GC_00000371		PV10SA01	2173	5	5	1	1	1	1	1	COG2869	Na+-transporting NADH:ubiquinone oxidoreductase, subunit NqrC (NqrC) (PDB:4P6V)	COG2869	Na+-translocating NADH dehydrogenase	C	Energy production and conversion	MNTNSNSYTIIYASIMVVIVAFLLAFVSSSLKEKQYQNVEQDTKKQILAALNVYDVKDVNAEYDKYVKEDDLMQADGSLVKNDAAFQTSYKGEIANGRLHVFVCDVDGQTKYVLPIYGAGLWGPIWGYIALNDDKDTVYGVYFSHQGETPGLGAEITTTKFQDQFLGKHVMENGTVALGVEKHGKVAKPDYQVDGISGGTITSKGVDAMIKDCLSMYNSFLTNK
3060	GC_00000371		PV26FA01	3817	5	5	1	1	1	1	1	COG2869	Na+-transporting NADH:ubiquinone oxidoreductase, subunit NqrC (NqrC) (PDB:4P6V)	COG2869	Na+-translocating NADH dehydrogenase	C	Energy production and conversion	MNTNSNSYTIIYASIMVVIVAFLLAFVSSSLKEKQYQNVEQDTKKQILAALNVYDVKDVNAEYDKYVKEDDLMQADGSLVKNDAAFQTSYKGEIANGRLHVFVCDVDGQTKYVLPIYGAGLWGPIWGYIALNDDKDTVYGVYFSHQGETPGLGAEITTTKFQDQFLGKHVMENGTVALGVEKHGKVAKPDYQVDGISGGTITSKGVDAMIKDCLSMYNSFLTNK
3061	GC_00000371		PV29FA01	1219	5	5	1	1	1	1	1	COG2869	Na+-transporting NADH:ubiquinone oxidoreductase, subunit NqrC (NqrC) (PDB:4P6V)	COG2869	Na+-translocating NADH dehydrogenase	C	Energy production and conversion	MNTNSNSYTIIYASIMVVIVAFLLAFVSSSLKEKQYQNVEQDTKKQILAALNVYDVKDVNAEYDKYVKEDDLMQADGSLVKNDAAFQTSYKGEIANGRLHVFVCDVDGQTKYVLPIYGAGLWGPIWGYIALNDDKDTVYGVYFSHQGETPGLGAEITTTKFQDQFLGKHVMENGTVALGVEKHGKVAKPDYQVDGISGGTITSKGVDAMIKDCLSMYNSFLTNK
3062	GC_00000371		PV2SA01	1667	5	5	1	1	1	1	1	COG2869	Na+-transporting NADH:ubiquinone oxidoreductase, subunit NqrC (NqrC) (PDB:4P6V)	COG2869	Na+-translocating NADH dehydrogenase	C	Energy production and conversion	MNTNSNSYTIIYASIMVVIVAFLLAFVSSSLKEKQYQNVEQDTKKQILAALNVYDVKDVNAEYDKYVKEDDLMQADGSLVKNDAAFQTSYKGEIANGRLHVFVCDVDGQTKYVLPIYGAGLWGPIWGYIALNDDKDTVYGVYFSHQGETPGLGAEITTTKFQDQFLGKHVMENGTVALGVEKHGKVAKPDYQVDGISGGTITSKGVDAMIKDCLSMYNSFLTNK
3063	GC_00000371		PV2SA02	2342	5	5	1	1	1	1	1	COG2869	Na+-transporting NADH:ubiquinone oxidoreductase, subunit NqrC (NqrC) (PDB:4P6V)	COG2869	Na+-translocating NADH dehydrogenase	C	Energy production and conversion	MNTNSNSYTIIYASIMVVIVAFLLAFVSSSLKEKQYQNVEQDTKKQILAALNVYDVKDVNAEYDKYVKEDDLMQADGSLVKNDAAFQTSYKGEIANGRLHVFVCDVDGQTKYVLPIYGAGLWGPIWGYIALNDDKDTVYGVYFSHQGETPGLGAEITTTKFQDQFLGKHVMENGTVALGVEKHGKVAKPDYQVDGISGGTITSKGVDAMIKDCLSMYNSFLTNK
4119	GC_00000583		PV10SA01	2171	5	5	1	1	1	1	1	COG2209	Na+-transporting NADH:ubiquinone oxidoreductase, subunit NqrE (NqrE) (PDB:4P6V)	COG2209	Na+-translocating NADH dehydrogenase	C	Energy production and conversion	MEYLSLFVKSIFVDNMIFAYFLGMCSYLAVSKNVKTAVGLGAAVTFVLIVTLPVNYLLENYVLAPNALIDGVDLSFLSFILFIAVIAGIVQLVEMAVERFSPSLYASLGIFLPLIAVNCAIMGASLFMQQRHFINIGEATTYALGSGIGWALAIIGLAAIREKMAYSDVPAPLKGLGITFITVGLMAMAFMCFSGLKI
4120	GC_00000583		PV26FA01	3819	5	5	1	1	1	1	1	COG2209	Na+-transporting NADH:ubiquinone oxidoreductase, subunit NqrE (NqrE) (PDB:4P6V)	COG2209	Na+-translocating NADH dehydrogenase	C	Energy production and conversion	MEYLSLFVKSIFVDNMIFAYFLGMCSYLAVSKNVKTAVGLGAAVTFVLIVTLPVNYLLENYVLAPNALIDGVDLSFLSFILFIAVIAGIVQLVEMAVERFSPSLYASLGIFLPLIAVNCAIMGASLFMQQRHFINIGEATTYALGSGIGWALAIIGLAAIREKMAYSDVPAPLKGLGITFITVGLMAMAFMCFSGLKI
4121	GC_00000583		PV29FA01	1221	5	5	1	1	1	1	1	COG2209	Na+-transporting NADH:ubiquinone oxidoreductase, subunit NqrE (NqrE) (PDB:4P6V)	COG2209	Na+-translocating NADH dehydrogenase	C	Energy production and conversion	MEYLSLFVKSIFVDNMIFAYFLGMCSYLAVSKNVKTAVGLGAAVTFVLIVTLPVNYLLENYVLAPNALIDGVDLSFLSFILFIAVIAGIVQLVEMAVERFSPSLYASLGIFLPLIAVNCAIMGASLFMQQRHFINIGEATTYALGSGIGWALAIIGLAAIREKMAYSDVPAPLKGLGITFITVGLMAMAFMCFSGLKI
4122	GC_00000583		PV2SA01	1665	5	5	1	1	1	1	1	COG2209	Na+-transporting NADH:ubiquinone oxidoreductase, subunit NqrE (NqrE) (PDB:4P6V)	COG2209	Na+-translocating NADH dehydrogenase	C	Energy production and conversion	MEYLSLFVKSIFVDNMIFAYFLGMCSYLAVSKNVKTAVGLGAAVTFVLIVTLPVNYLLENYVLAPNALIDGVDLSFLSFILFIAVIAGIVQLVEMAVERFSPSLYASLGIFLPLIAVNCAIMGASLFMQQRHFINIGEATTYALGSGIGWALAIIGLAAIREKMAYSDVPAPLKGLGITFITVGLMAMAFMCFSGLKI
4123	GC_00000583		PV2SA02	2340	5	5	1	1	1	1	1	COG2209	Na+-transporting NADH:ubiquinone oxidoreductase, subunit NqrE (NqrE) (PDB:4P6V)	COG2209	Na+-translocating NADH dehydrogenase	C	Energy production and conversion	MEYLSLFVKSIFVDNMIFAYFLGMCSYLAVSKNVKTAVGLGAAVTFVLIVTLPVNYLLENYVLAPNALIDGVDLSFLSFILFIAVIAGIVQLVEMAVERFSPSLYASLGIFLPLIAVNCAIMGASLFMQQRHFINIGEATTYALGSGIGWALAIIGLAAIREKMAYSDVPAPLKGLGITFITVGLMAMAFMCFSGLKI
17693	GC_00003451		PV29FA01	2802	3	3	1	0	0.991342	1	0.995652	COG1905	NADH:ubiquinone oxidoreductase 24 kD subunit (chain E) (NuoE) (PDB:5XF9)	COG1905	NADH dehydrogenase	C	Energy production and conversion	MVTYYTFFAMIPKGKHPISVCMGTVCRVRGSEKLPEEFKRILGIEAGETTPDGKFFPDCLWCVGAYGLPPVIMIESL
17694	GC_00003451		PV2SA01	177	3	3	1	0	0.991342	1	0.995652	COG1905	NADH:ubiquinone oxidoreductase 24 kD subunit (chain E) (NuoE) (PDB:5XF9)	COG1905	NADH dehydrogenase	C	Energy production and conversion	MVTYYTFFAMIPKGKHPISVCMGTVCRVRGSEKLPEEFKRILGIEAGETTPDGKFFPDCLWCVGAYGLLPVIMIESL
17695	GC_00003451		PV2SA02	852	3	3	1	0	0.991342	1	0.995652	COG1905	NADH:ubiquinone oxidoreductase 24 kD subunit (chain E) (NuoE) (PDB:5XF9)	COG1905	NADH dehydrogenase	C	Energy production and conversion	MVTYYTFFAMIPKGKHPISVCMGTVCRVRGSEKLPEEFKRILGIEAGETTPDGKFFPDCLWCVGAYGLLPVIMIESL
9149	GC_00001591		PV10SA01	2682	5	5	1	1	0.99973	1	0.999865	COG1882	Pyruvate-formate lyase (PflD) (PDB:1CM5)	COG1882	Pyruvate oxidation	C	Energy production and conversion	MEMNKVFKDGLWSKEINVSDFVYTNITPYEGDASFLAGPTERTKKVWNECLKALEEERANNGVRSLDNVTVSTITSHKAGYIDRENELIVGLQTDELLRRAIKPYGGIKVVEKACHENGVEVDEKVKDIFTHYRKTHNDGVFDAYTEEIRSFRSLGFLTGLPDNYARGRIIGDYRRLALYGIDRLIEAKQEDLRNITSPMTDARIRLREEVAEQIKALKEIKILGEYYGLDLSRPATNAQEAVQWVYMAYLAAVKEQDGAAMSLGNVSSFLDIYIQYDLDHGKIDESFAQELVDQFIIKLRMVRHLRMQSYNDIFAGDPTWVTESIGGRFNDGRTKVTKTSFRFLQTLYNLGPSPEPNMTVLWSPELPEGFKEFCAQVSIDTSSIQYENDTLMREVRNC…
9150	GC_00001591		PV26FA01	3499	5	5	1	1	0.99973	1	0.999865	COG1882	Pyruvate-formate lyase (PflD) (PDB:1CM5)	COG1882	Pyruvate oxidation	C	Energy production and conversion	MEMNKVFKDGLWSKEINVSDFVYTNITPYEGDASFLAGPTERTKKVWNECLKALEEERANNGVRSLDNVTVSTITSHKAGYIDRENELIVGLQTDELLRRAIKPYGGIKVVEKACHENGVEVDEKVKDIFTHYRKTHNDGVFDAYTEEIRSFRSLGFLTGLPDNYARGRIIGDYRRLALYGIDRLIEAKQEDLRNITSPMTDARIRLREEVAEQIKALKEIKILGEYYGLDLSRPATNAQEAVQWVYMAYLAAVKEQDGAAMSLGNVSSFLDIYIQYDLDHGKIDESFAQELVDQFIIKLRMVRHLRMQSYNDIFAGDPTWVTESIGGRFNDGRTKVTKTSFRFLQTLYNLGPSPEPNMTVLWSPELPEGFKEFCAQVSIDTSSIQYENDTLMREVRNC…
9151	GC_00001591		PV29FA01	916	5	5	1	1	0.99973	1	0.999865	COG1882	Pyruvate-formate lyase (PflD) (PDB:1CM5)	COG1882	Pyruvate oxidation	C	Energy production and conversion	MEMNKVFKDGLWSKEINVSDFVYTNITPYEGDASFLAGPTERTKKVWNECLKALEEERANNGVRSLDNVTVSTITSHKAGYIDRENELIVGLQTDELLRRAIKPYGGIKVVEKACHENGVEVDEKVKDIFTHYRKTHNDGVFDAYTEEIRSFRSLGFLTGLPDNYARGRIIGDYRRLALYGIDRLIEAKQEDLRNITSPMTDARIRLREEVAEQIKALKEIKILGEYYGLDLSRPATNAQEAVQWVYMAYLAAVKEQDGAAMSLGNVSSFLDIYIQYDLDHGKIDESFAQELVDQFIIKLRMVRHLRMQSYNDIFAGDPTWVTESIGGRFNDGRTKVTKTSFRFLQTLYNLGPSPEPNMTVLWSPELPEGFKEFCAQVSIDTSSIQYENDTLMREVRNC…
9152	GC_00001591		PV2SA01	1196	5	5	1	1	0.99973	1	0.999865	COG1882	Pyruvate-formate lyase (PflD) (PDB:1CM5)	COG1882	Pyruvate oxidation	C	Energy production and conversion	MEMNKVFKDGLWSKEINVSDFVYTNITPYEGDASFLAGPTERTKKVWNECLKALEEERANNGVRSLDNVTVSTITSHKAGYIDRENELIVGLQTDELLRRAIKPYGGIKVVEKACHENGVEVDEKVKDIFTHYRKTHNDGVFDAYTEEIRSFRSLGFLTGLPDNYARGRIIGDYRRLALYGIDRLIEAKQEDLRNITSPMTDARIRLREEVAEQIKALKEIKILGEYYGLDLSRPATNAQEAVQWVYMAYLAAVKEQDGAAMSLGNVSSFLDIYIQYDLDHGKIDESFAQELVDQFIIKLRMVRHLRMQSYNDIFAGDPTWVTESIGGRFNDGRTKVTKTSFRFLQTLYNLGPSPEPNMTVLWSPELPEGFKEFCAQVSIDTSSIQYENDTLMREVRNC…
9153	GC_00001591		PV2SA02	1871	5	5	1	1	0.99973	1	0.999865	COG1882	Pyruvate-formate lyase (PflD) (PDB:1CM5)	COG1882	Pyruvate oxidation	C	Energy production and conversion	MEMNKVFKDGLWSKEINVSDFVYTNITPYEGDASFLAGPTERTKKVWNECLKALEEERANNGVRSLDNVTVSTITSHKAGYIDRENELIVGLQTDELLRRAIKPYGGIKVVEKACHENGVEVDEKVKDIFTHYRKTHNDGVFDAYTEEIRSFRSLGFLTGLPDNYARGRIIGDYRRLALYGIDRLIEAKQEDLRNITSPMTDARIRLREEVAEQIKALKEIKILGEYYGLDLSRPATNAQEAVQWVYMAYLAAVKEQDGAAMSLGNVSSFLDIYIQYDLDHGKIDESFAQELVDQFIIKLRMVRHLRMQSYNDIFAGDPTWVTESIGGRFNDGRTKVTKTSFRFLQTLYNLGPSPEPNMTVLWSPELPEGFKEFCAQVSIDTSSIQYENDTLMREVRNC…
15094	GC_00002781		PV10SA01	4022	5	5	1	1	0.997801	0.97592	0.986739	COG1882	Pyruvate-formate lyase (PflD) (PDB:1CM5)	COG1882	Pyruvate oxidation	C	Energy production and conversion	----------------------MTDRIRRLRQESFDTQPSLSIERALIETEFYKENEGKYPIPILRALNFLEICKRKTIYIGEDELIVGERGPRPKAVSTFPELTCHSVEDLHVLNTRELQRYTISQEDIDTYEREVIPYWKGRTQRERIFNHVPKEWKEAYEVGMFTEFMEQRAPGHTSLDGKVYQHGMLDLKERIAHELKNLDFMNDPEATDKQEELTAMSISCDAAIIFAERHAELAEKMAGQETDPKRKEELKKIAEICRWVPAHAPRTYWEAIQMYWFVHLGTITELNGWDAMNPGHFDQHLAPFYEKDLEEGILTRAEAKELMSCFFIKVNNQTAPPKVGITAKESGTYNDFTNLNIGGITRDGSNGVSEVSYIMLETVDDLHLLQPGSALHI…
15095	GC_00002781		PV26FA01	2194	5	5	1	1	0.997801	0.97592	0.986739	COG1882	Pyruvate-formate lyase (PflD) (PDB:1CM5)	COG1882	Pyruvate oxidation	C	Energy production and conversion	----------------------MTDRIRRLRQESFDTQPSLSIERALIETEFYKENEGKYPIPILRALNFLEICKRKTIYIGEDELIVGERGPRPKAVSTFPELTCHSVEDLHVLNTRELQRYTISQEDIDTYEREVIPYWKGRTQRERIFNHVPKEWKEAYEVGMFTEFMEQRAPGHTSLDGKVYQHGMLDLKERIAHELKNLDFMNDPEATDKQEELTAMSISCDAAIIFAERHAELAEKMAGQETDPKRKEELKKIAEICRWVPAHAPRTYWEAIQMYWFVHLGTITELNGWDAMNPGHFDQHLAPFYEKDLEEGILTRAEAKELMSCFFIKVNNQTAPPKVGITAKESGTYNDFTNLNIGGIKRDGSNGVSEVSYIMLETVDDLHLLQPGSALHI…
15096	GC_00002781		PV29FA01	3280	5	5	1	1	0.997801	0.97592	0.986739	COG1882	Pyruvate-formate lyase (PflD) (PDB:1CM5)	COG1882	Pyruvate oxidation	C	Energy production and conversion	----------------------MTDRIRRLRQESFDTQPSLSIERALIETEFYKENEGKYPIPILRALNFLEICKRKTIYIGEDELIVGERGPRPKAVSTFPELTCHSVEDLHVLNTRELQRYTISQEDIDTYEREVIPYWKGRTQRERIFNHVPKEWKEAYEVGMFTEFMEQRAPGHTSLDGKVYQHGMLDLKERIAHELKNLDFMNDPEATDKQEELTAMSISCDAAIIFAERHAELAEKMAGQETDPKRKEELKKIAEICRWVPAHAPRTYWEAIQMYWFVHLGTITELNGWDAMNPGHFDQHLAPFYEKDLEEGILTRAEAKELMSCFFIKVNNQTAPPKVGITAKESGTYNDFTNLNIGGIKRDGSNGVSEVSYIMLETVDDLHLLQPGSALHI…
15097	GC_00002781		PV2SA01	3319	5	5	1	1	0.997801	0.97592	0.986739	COG1882	Pyruvate-formate lyase (PflD) (PDB:1CM5)	COG1882	Pyruvate oxidation	C	Energy production and conversion	MEISIYEPVDLITTLMKTTINGMTDRIRRLRQESFDTQPSLSIERALIETEFYKENEGKYPIPILRALNFLEICKRKTIYIGEDELIVGERGPRPKAVSTFPELTCHSVEDLHVLNTRELQRYTISQEDIDTYEREVIPYWKGRTQRERIFNHVPKEWKEAYEVGMFTEFMEQRAPGHTSLDGKVYQHGMLDLKERIAHELKNLDFMNDPEATDKQEELTAMSISCDAAIIFAERHAELAEKMAGQETDPKRKEELKKIAEICRWVPAHAPRTYWEAIQMYWFVHLGTITELNGWDAMNPGHFDQHLAPFYEKDLEEGILTRAEAKELMSCFFIKVNNQTAPPKVGITAKESGTYNDFTNLNIGGIKRDGSNGVSEVSYIMLETVDDLHLLQPGSALHI…
15098	GC_00002781		PV2SA02	3994	5	5	1	1	0.997801	0.97592	0.986739	COG1882	Pyruvate-formate lyase (PflD) (PDB:1CM5)	COG1882	Pyruvate oxidation	C	Energy production and conversion	MEISIYEPVDLITTLMKTTINGMTDRIRRLRQESFDTQPSLSIERALIETEFYKENEGKYPIPILRALNFLEICKRKTIYIGEDELIVGERGPRPKAVSTFPELTCHSVEDLHVLNTRELQRYTISQEDIDTYEREVIPYWKGRTQRERIFNHVPKEWKEAYEVGMFTEFMEQRAPGHTSLDGKVYQHGMLDLKERIAHELKNLDFMNDPEATDKQEELTAMSISCDAAIIFAERHAELAEKMAGQETDPKRKEELKKIAEICRWVPAHAPRTYWEAIQMYWFVHLGTITELNGWDAMNPGHFDQHLAPFYEKDLEEGILTRAEAKELMSCFFIKVNNQTAPPKVGITAKESGTYNDFTNLNIGGIKRDGSNGVSEVSYIMLETVDDLHLLQPGSALHI…
11484	GC_00002058		PV10SA01	235	5	5	1	1	0.998879	1	0.999439	COG1866	Phosphoenolpyruvate carboxykinase, ATP-dependent (PckA) (PDB:1AQ2)	COG1866	Gluconeogenesis	C	Energy production and conversion	MANLDLSKYGITDVKEVLHNPSYDVLFAEETKPGLEGFEKGQVTELGAVNVMTGVYTGRSPKDKFFVKNEASENSVWWTSDEYKNDNKPCTEEAWADLKSKAVKQLSGKRLFVVDTFCGANAATRMKVRFIMEVAWQAHFVTNMFIRPTAEELEAYGEPDFVCFNASKAKVDNYKELGLNSETATVFNLKTKEQVILNTWYGGEMKKGMFSIMNYMNPLRGIASMHCSANTNMEGTSSAIFFGLSGTGKTTLSTDPKRKLIGDDEHGWDDEGVFNYEGGCYAKVINLDKESEPDIYAAIKRDALLENVTVDANGKIDFADKSVTENTRVSYPIYHIENIVKPISKGPHAQQVIFLSADAFGVLPPVSILNPEQAQYYFLSGFTAKLAGTERGITEPTPT…
11485	GC_00002058		PV26FA01	1724	5	5	1	1	0.998879	1	0.999439	COG1866	Phosphoenolpyruvate carboxykinase, ATP-dependent (PckA) (PDB:1AQ2)	COG1866	Gluconeogenesis	C	Energy production and conversion	MANLDLSKYGITDVKEVLHNPSYDVLFAEETKPGLEGFEKGQVTELGAVNVMTGVYTGRSPKDKFFVKNEASENSVWWTSDEYKNDNKPCTEEAWADLKSKAVKQLSGKRLFVVDTFCGANAATRMKVRFIMEVAWQAHFVTNMFIRPTAEELEAYGEPDFVCFNASKAKVDNYKELGLNSETATVFNLKTKEQVILNTWYGGEMKKGMFSIMNYMNPLRGIASMHCSANTNMEGTSSAIFFGLSGTGKTTLSTDPKRKLIGDDEHGWDDEGVFNYEGGCYAKVINLDKESEPDIYAAIKRDALLENVTVDANGKIDFADKSVTENTRVSYPIYHIENIVKPISKGPHAQQVIFLSADAFGVLPPVSILNPEQAQYYFLSGFTAKLAGTERGITEPTPT…
11486	GC_00002058		PV29FA01	3834	5	5	1	1	0.998879	1	0.999439	COG1866	Phosphoenolpyruvate carboxykinase, ATP-dependent (PckA) (PDB:1AQ2)	COG1866	Gluconeogenesis	C	Energy production and conversion	MANLDLSKYGITDVKEVLHNPSYDVLFAEETKPGLEGFEKGQVTELGAVNVMTGVYTGRSPKDKFFVKNEASENSVWWTSDEYKNDNKPCTEEAWADLKSKAVKQLSGKRLFVVDTFCGANAATRMKVRFIMEVAWQAHFVTNMFIRPTAEELEAYGEPDFVCFNASKAKVDNYKELGLNSETATVFNLKTKEQVILNTWYGGEMKKGMFSIMNYMNPLRGIASMHCSANTNMEGTSSAIFFGLSGTGKTTLSTDPKRKLIGDDEHGWDDEGVFNYEGGCYAKVINLDKESEPDIYAAIKRDALLENVTVDANGKIDFADKSVTENTRVSYPIYHIENIVKPISKGPHAQQVIFLSADAFGVLPPVSILNPEQAQYYFLSGFTAKLAGTERGITEPTPT…
11487	GC_00002058		PV2SA01	3840	5	5	1	1	0.998879	1	0.999439	COG1866	Phosphoenolpyruvate carboxykinase, ATP-dependent (PckA) (PDB:1AQ2)	COG1866	Gluconeogenesis	C	Energy production and conversion	MANLDLSKYGITDVKEVLHNPSYDVLFAEETKPGLEGFEKGQVTELGAVNVMTGVYTGRSPKDKFFVKNEASENSVWWTSDEYKNDNKPCTEEAWADLKSKAVKQLSGKRLFVVDTFCGANAATRMKVRFIMEVAWQAHFVTNMFIRPTAEELEAYGEPDFVCFNASKAKVDNYKELGLNSETATVFNLKTKEQVILNTWYGGEMKKGMFSIMNYMNPLRGIASMHCSANTNMEGTSSAIFFGLSGTGKTTLSTDPKRKLIGDDEHGWDDEGVFNYEGGCYAKVINLDKESEPDIYAAIKRDALLENVTVDANGKIDFADKSVTENTRVSYPIYHIENIVKPISKGPHAQQVIFLSADAFGVLPPVSILNPEQAQYYFLSGFTAKLAGTERGITEPTPT…
11488	GC_00002058		PV2SA02	327	5	5	1	1	0.998879	1	0.999439	COG1866	Phosphoenolpyruvate carboxykinase, ATP-dependent (PckA) (PDB:1AQ2)	COG1866	Gluconeogenesis	C	Energy production and conversion	MANLDLSKYGITDVKEVLHNPSYDVLFAEETKPGLEGFEKGQVTELGAVNVMTGVYTGRSPKDKFFVKNEASENSVWWTSDEYKNDNKPCTEEAWADLKSKAVKQLSGKRLFVVDTFCGANAATRMKVRFIMEVAWQAHFVTNMFIRPTAEELEAYGEPDFVCFNASKAKVDNYKELGLNSETATVFNLKTKEQVILNTWYGGEMKKGMFSIMNYMNPLRGIASMHCSANTNMEGTSSAIFFGLSGTGKTTLSTDPKRKLIGDDEHGWDDEGVFNYEGGCYAKVINLDKESEPDIYAAIKRDALLENVTVDANGKIDFADKSVTENTRVSYPIYHIENIVKPISKGPHAQQVIFLSADAFGVLPPVSILNPEQAQYYFLSGFTAKLAGTERGITEPTPT…
3269	GC_00000413		PV10SA01	2394	5	5	1	1	1	1	1	COG1853	FMN reductase RutF, DIM6/NTAB family (RutF) (PDB:1EJE)	COG1853	Pyrimidine degradation	C	Energy production and conversion	MRKNLGAKPFTYPQPVFIIAAYDENGLPNAMNAAWGGISEMNEISICISEGHKTTANILKRKAFTVSMAEAGQIIACDYVGIVSGNKVPDKFARAGFHATRSEFVDAPLIDELSVAVECKLKDYNPETCILRGEIVNVSVDERVLDQNGKVDASKVIPVIFDPFNNDYLKVGEKVGNAFSDGKALK
3270	GC_00000413		PV26FA01	3703	5	5	1	1	1	1	1	COG1853	FMN reductase RutF, DIM6/NTAB family (RutF) (PDB:1EJE)	COG1853	Pyrimidine degradation	C	Energy production and conversion	MRKNLGAKPFTYPQPVFIIAAYDENGLPNAMNAAWGGISEMNEISICISEGHKTTANILKRKAFTVSMAEAGQIIACDYVGIVSGNKVPDKFARAGFHATRSEFVDAPLIDELSVAVECKLKDYNPETCILRGEIVNVSVDERVLDQNGKVDASKVIPVIFDPFNNDYLKVGEKVGNAFSDGKALK
3271	GC_00000413		PV29FA01	1122	5	5	1	1	1	1	1	COG1853	FMN reductase RutF, DIM6/NTAB family (RutF) (PDB:1EJE)	COG1853	Pyrimidine degradation	C	Energy production and conversion	MRKNLGAKPFTYPQPVFIIAAYDENGLPNAMNAAWGGISEMNEISICISEGHKTTANILKRKAFTVSMAEAGQIIACDYVGIVSGNKVPDKFARAGFHATRSEFVDAPLIDELSVAVECKLKDYNPETCILRGEIVNVSVDERVLDQNGKVDASKVIPVIFDPFNNDYLKVGEKVGNAFSDGKALK
3272	GC_00000413		PV2SA01	1404	5	5	1	1	1	1	1	COG1853	FMN reductase RutF, DIM6/NTAB family (RutF) (PDB:1EJE)	COG1853	Pyrimidine degradation	C	Energy production and conversion	MRKNLGAKPFTYPQPVFIIAAYDENGLPNAMNAAWGGISEMNEISICISEGHKTTANILKRKAFTVSMAEAGQIIACDYVGIVSGNKVPDKFARAGFHATRSEFVDAPLIDELSVAVECKLKDYNPETCILRGEIVNVSVDERVLDQNGKVDASKVIPVIFDPFNNDYLKVGEKVGNAFSDGKALK
3273	GC_00000413		PV2SA02	2079	5	5	1	1	1	1	1	COG1853	FMN reductase RutF, DIM6/NTAB family (RutF) (PDB:1EJE)	COG1853	Pyrimidine degradation	C	Energy production and conversion	MRKNLGAKPFTYPQPVFIIAAYDENGLPNAMNAAWGGISEMNEISICISEGHKTTANILKRKAFTVSMAEAGQIIACDYVGIVSGNKVPDKFARAGFHATRSEFVDAPLIDELSVAVECKLKDYNPETCILRGEIVNVSVDERVLDQNGKVDASKVIPVIFDPFNNDYLKVGEKVGNAFSDGKALK
6464	GC_00001054		PV10SA01	2068	5	5	1	1	1	1	1	COG1853	FMN reductase RutF, DIM6/NTAB family (RutF) (PDB:1EJE)	COG1853	Pyrimidine degradation	C	Energy production and conversion	MKQDWKPGTMIYPLPALLVSCGSTEEEYNIITVAWAGTICTNPAMCYISVRPERHSYPILKRNMEFVINLTTKSMAFATDWCGVRSGKDYNKFEEMKLTPGKAKIVSAPIIEESPLCIECRVKEIISLGSHDMFIADVVNVKADDKYLNAETGKFELSEANPLVYVHGGYFELGPKIGKFGWSVEKNRSQTKEKS
6465	GC_00001054		PV26FA01	3995	5	5	1	1	1	1	1	COG1853	FMN reductase RutF, DIM6/NTAB family (RutF) (PDB:1EJE)	COG1853	Pyrimidine degradation	C	Energy production and conversion	MKQDWKPGTMIYPLPALLVSCGSTEEEYNIITVAWAGTICTNPAMCYISVRPERHSYPILKRNMEFVINLTTKSMAFATDWCGVRSGKDYNKFEEMKLTPGKAKIVSAPIIEESPLCIECRVKEIISLGSHDMFIADVVNVKADDKYLNAETGKFELSEANPLVYVHGGYFELGPKIGKFGWSVEKNRSQTKEKS
6466	GC_00001054		PV29FA01	1328	5	5	1	1	1	1	1	COG1853	FMN reductase RutF, DIM6/NTAB family (RutF) (PDB:1EJE)	COG1853	Pyrimidine degradation	C	Energy production and conversion	MKQDWKPGTMIYPLPALLVSCGSTEEEYNIITVAWAGTICTNPAMCYISVRPERHSYPILKRNMEFVINLTTKSMAFATDWCGVRSGKDYNKFEEMKLTPGKAKIVSAPIIEESPLCIECRVKEIISLGSHDMFIADVVNVKADDKYLNAETGKFELSEANPLVYVHGGYFELGPKIGKFGWSVEKNRSQTKEKS
6467	GC_00001054		PV2SA01	1563	5	5	1	1	1	1	1	COG1853	FMN reductase RutF, DIM6/NTAB family (RutF) (PDB:1EJE)	COG1853	Pyrimidine degradation	C	Energy production and conversion	MKQDWKPGTMIYPLPALLVSCGSTEEEYNIITVAWAGTICTNPAMCYISVRPERHSYPILKRNMEFVINLTTKSMAFATDWCGVRSGKDYNKFEEMKLTPGKAKIVSAPIIEESPLCIECRVKEIISLGSHDMFIADVVNVKADDKYLNAETGKFELSEANPLVYVHGGYFELGPKIGKFGWSVEKNRSQTKEKS
6468	GC_00001054		PV2SA02	2238	5	5	1	1	1	1	1	COG1853	FMN reductase RutF, DIM6/NTAB family (RutF) (PDB:1EJE)	COG1853	Pyrimidine degradation	C	Energy production and conversion	MKQDWKPGTMIYPLPALLVSCGSTEEEYNIITVAWAGTICTNPAMCYISVRPERHSYPILKRNMEFVINLTTKSMAFATDWCGVRSGKDYNKFEEMKLTPGKAKIVSAPIIEESPLCIECRVKEIISLGSHDMFIADVVNVKADDKYLNAETGKFELSEANPLVYVHGGYFELGPKIGKFGWSVEKNRSQTKEKS
9379	GC_00001637		PV10SA01	4284	5	5	1	1	0.996429	1	0.998211	COG1853	FMN reductase RutF, DIM6/NTAB family (RutF) (PDB:1EJE)	COG1853	Pyrimidine degradation	C	Energy production and conversion	MKEIKVNELTDNLFETISKEWMLVTAGTKDKFNTMTANWGGAGFLWNRPVAFIFIRPERYTFDFIEQNDYLTLSFLGEEHKEIHKICGSKSGRDMDKVKATGLSPLFTENGSITFEQARLTFECKKLYADLIKPGNFIDKSITDRWYGESHGGFHKMYVVEIVNVLSR
9380	GC_00001637		PV26FA01	1956	5	5	1	1	0.996429	1	0.998211	COG1853	FMN reductase RutF, DIM6/NTAB family (RutF) (PDB:1EJE)	COG1853	Pyrimidine degradation	C	Energy production and conversion	MKEIKVNELTDNLFETISKEWMLVTAGTKDKFNTMTANWGGAGFLWNRPVAFIFIRPERYTFDFIEQNDYLTLSFLGEEHKEIHKICGSKSGRDMDKVKATGLSPLFTENGSITFEQARLTFECKKLYADLIKPGNFIDKSITDRWYGESHGGFHKMYVVEIVNVLSR
9381	GC_00001637		PV29FA01	3532	5	5	1	1	0.996429	1	0.998211	COG1853	FMN reductase RutF, DIM6/NTAB family (RutF) (PDB:1EJE)	COG1853	Pyrimidine degradation	C	Energy production and conversion	MKEIKVNELTDNLFETISKEWMLVTAGTKDKFNTMTANWGGAGFLWNRPVAFIFIRPERYTFDFIEQNDYLTLSFLGEEHKEIHKICGSKSGRDMDKVKATGLSPLFTENGSITFEQARLTFECKKLYADLIKPGNFIDKSITDRWYGESHGGFHKMYVVEIVNVLSR
9382	GC_00001637		PV2SA01	4059	5	5	1	1	0.996429	1	0.998211	COG1853	FMN reductase RutF, DIM6/NTAB family (RutF) (PDB:1EJE)	COG1853	Pyrimidine degradation	C	Energy production and conversion	MKEIKVNELTDNLFETISKEWMLVTAGTKDKFNTMTANWGGTGFLWNRPVAFIFIRPERYTFDFIEQNDYLTLSFLGEEHKEIHKICGSKSGRDMDKVKATGLSPLFTENGSITFEQARLTFECKKLYADLIKPGNFIDKSITDRWYGESHGGFHKMYVVEIVNVLSR
9383	GC_00001637		PV2SA02	70	5	5	1	1	0.996429	1	0.998211	COG1853	FMN reductase RutF, DIM6/NTAB family (RutF) (PDB:1EJE)	COG1853	Pyrimidine degradation	C	Energy production and conversion	MKEIKVNELTDNLFETISKEWMLVTAGTKDKFNTMTANWGGTGFLWNRPVAFIFIRPERYTFDFIEQNDYLTLSFLGEEHKEIHKICGSKSGRDMDKVKATGLSPLFTENGSITFEQARLTFECKKLYADLIKPGNFIDKSITDRWYGESHGGFHKMYVVEIVNVLSR
15029	GC_00002768		PV10SA01	3288	5	5	1	1	0.995068	1	0.997528	COG1853	FMN reductase RutF, DIM6/NTAB family (RutF) (PDB:1EJE)	COG1853	Pyrimidine degradation	C	Energy production and conversion	MKKILFLMLLCLPFIAMAQTDPKYLAGAITMDDGKVSFKTEIQAPSLTKDQLYGTMLKWATERFKPEGKFNARVLYTNEDEGTIAAGGEEYLVFSSSALSLDRTRIYYQLFITCENGKCDIEMTRIRYWYDEARDGGEKYSAEEWIVDDMALNKSKTKLAPICGKFRRETIDLKDTLFKSIQDTLGNKVLNNSQIAVAPAPGVTATPISNATTIVTATPVTPPAQPAVIGGSEGNTEIKAANNATPSKEQSIDDQIKASSRMTITAGNDEQFEIGKECWGGFGQLFGKEVAFCVIDQAKSMGNMLMDQSDNYKISFYKQGNSEPWLIVNCKKLMKQTVTGEEAKKMNPSNDGQKAYNMYVGEVIK
15030	GC_00002768		PV26FA01	2927	5	5	1	1	0.995068	1	0.997528	COG1853	FMN reductase RutF, DIM6/NTAB family (RutF) (PDB:1EJE)	COG1853	Pyrimidine degradation	C	Energy production and conversion	MKKILFLMLLCLPFIAMAQTDPKYLAGAITMNDGKVSFKTEIQAPSLTKDQLYGTMLKWATERFKPEGKFNARVLYTNEDEGTIAAGGEEYLVFSSSALSLDRTRIYYQLFITCENGKCDIEMTRIRYWYDEARDGGEKYSAEEWIVDDMALNKSKTKLAPICGKFRRETIDLKDTLFKSIQDTLGNKVLNNSQIAVAPAPGVTATPISNATTIVTATPVTPPAQPAVIGGSEGNTEIKAANNATPSKEQSIDDQIKASSRMTITAGNDEQFEIGKECWGGFGQLFGKEVAFCVIDQAKSMGNMLMDQSDNYKISFYKQGNSEPWLIVNCKKLMKQTVTGEEAKKMNPSNDGQKAYNMYVGEVIK
15031	GC_00002768		PV29FA01	136	5	5	1	1	0.995068	1	0.997528	COG1853	FMN reductase RutF, DIM6/NTAB family (RutF) (PDB:1EJE)	COG1853	Pyrimidine degradation	C	Energy production and conversion	MKKILFLMLLCLPFIAMAQTDPKYLAGAITMDDGKVSFKTEIQAPSLTKDQLYGTMLKWATERFKPEGKFNARVLYTNEDEGTIAAGGEEYLVFSSSALSLDRTRIYYQLFITCENGKCDIEMTRIRYWYDEARDGGEKYSAEEWIVDDMALNKSKTKLAPICGKFRRETIDLKDTLFKSIQDTLGNKVLNNSQIAVAPAPGVTATPISNATTIVTATPVTPSAQPAVIGGSEGNTEIKAANNATPNKEQSIDDQIKASSRMTITAGNDEQFEIGKECWGGFGQLFGKEVAFCVIDQAKSMGNMLMDQSDNYKISFYKQGNSEPWLIVNCKKLMKQTVTGEEAKKMNPSNDGQKAYNMYVGEVIK
15032	GC_00002768		PV2SA01	2521	5	5	1	1	0.995068	1	0.997528	COG1853	FMN reductase RutF, DIM6/NTAB family (RutF) (PDB:1EJE)	COG1853	Pyrimidine degradation	C	Energy production and conversion	MKKILFLMLLCLPFIAMAQTDPKYLAGAITMDDGKVSFKTEIQAPSLTKDQLYDTMLKWATERFKPEGKFNARVLYTNEDEGTIAAGGEEYLVFSSSALSLDRTRIYYQLFITCENGKCDIEMTRIRYWYDEARDGGEKYSAEEWIVDDMALNKSKTKLAPICGKFRRETIDLKDTLFKSIQDTLGNKVLNNSQIAVAPAPGVTATPISNATTIVTATPVTPPAQPAVIGGSEGNTEIKAANNATPSKEQSIDDQIKASSRMTITAGNDEQFEIGKECWGGFGQLFGKEVAFCVIDQAKSMGNMLMDQSDNYKISFYKQGNSEPWLIVNCKKLMKQTVTGEEAKKMNPSNDGQKAYNMYVGEVIK
15033	GC_00002768		PV2SA02	3196	5	5	1	1	0.995068	1	0.997528	COG1853	FMN reductase RutF, DIM6/NTAB family (RutF) (PDB:1EJE)	COG1853	Pyrimidine degradation	C	Energy production and conversion	MKKILFLMLLCLPFIAMAQTDPKYLAGAITMDDGKVSFKTEIQAPSLTKDQLYDTMLKWATERFKPEGKFNARVLYTNEDEGTIAAGGEEYLVFSSSALSLDRTRIYYQLFITCENGKCDIEMTRIRYWYDEARDGGEKYSAEEWIVDDMALNKSKTKLAPICGKFRRETIDLKDTLFKSIQDTLGNKVLNNSQIAVAPAPGVTATPISNATTIVTATPVTPPAQPAVIGGSEGNTEIKAANNATPSKEQSIDDQIKASSRMTITAGNDEQFEIGKECWGGFGQLFGKEVAFCVIDQAKSMGNMLMDQSDNYKISFYKQGNSEPWLIVNCKKLMKQTVTGEEAKKMNPSNDGQKAYNMYVGEVIK
3359	GC_00000431		PV10SA01	2174	5	5	1	1	1	1	1	COG1805	Na+-transporting NADH:ubiquinone oxidoreductase, subunit NqrB (NqrB) (PDB:4P6V)	COG1805	Na+-translocating NADH dehydrogenase	C	Energy production and conversion	MKALRNYLDKIKPNFEEGGKLHAFRSVFDGFETFLFVPNSTSKTGVHIHDAIDSKRIMSMVVIALIPALLFGMYNVGYQHFLAVGQEAGFFEKFIYGFLAVLPKIIVSYVVGLGIEFVVAQWKNEEIQEGFLVSGLLIPMIVPVECPLWILAVATAFSVIFAKEVFGGTGMNIFNPALITRAFLFFAYPTKMSGDAVWVSTDSIFGIGGGQVVDGFTGATMLGQAATAAPGASELINVNGTPATMWDMVVGLIPGSIGETSVIAIALGAIILLWTGVASWKTMFSVFAGGIVMGLIFNVFGSTDNMMAQLPWYEHIVLGGFCFGAVFMATDPVTSARTEKGKFIYGFLIGVMAIVIRVLNPGYPEGMMLAILLMNIFAPLIDYCIVQKNITARENRLKS…
3360	GC_00000431		PV26FA01	3816	5	5	1	1	1	1	1	COG1805	Na+-transporting NADH:ubiquinone oxidoreductase, subunit NqrB (NqrB) (PDB:4P6V)	COG1805	Na+-translocating NADH dehydrogenase	C	Energy production and conversion	MKALRNYLDKIKPNFEEGGKLHAFRSVFDGFETFLFVPNSTSKTGVHIHDAIDSKRIMSMVVIALIPALLFGMYNVGYQHFLAVGQEAGFFEKFIYGFLAVLPKIIVSYVVGLGIEFVVAQWKNEEIQEGFLVSGLLIPMIVPVECPLWILAVATAFSVIFAKEVFGGTGMNIFNPALITRAFLFFAYPTKMSGDAVWVSTDSIFGIGGGQVVDGFTGATMLGQAATAAPGASELINVNGTPATMWDMVVGLIPGSIGETSVIAIALGAIILLWTGVASWKTMFSVFAGGIVMGLIFNVFGSTDNMMAQLPWYEHIVLGGFCFGAVFMATDPVTSARTEKGKFIYGFLIGVMAIVIRVLNPGYPEGMMLAILLMNIFAPLIDYCIVQKNITARENRLKS…
3361	GC_00000431		PV29FA01	1218	5	5	1	1	1	1	1	COG1805	Na+-transporting NADH:ubiquinone oxidoreductase, subunit NqrB (NqrB) (PDB:4P6V)	COG1805	Na+-translocating NADH dehydrogenase	C	Energy production and conversion	MKALRNYLDKIKPNFEEGGKLHAFRSVFDGFETFLFVPNSTSKTGVHIHDAIDSKRIMSMVVIALIPALLFGMYNVGYQHFLAVGQEAGFFEKFIYGFLAVLPKIIVSYVVGLGIEFVVAQWKNEEIQEGFLVSGLLIPMIVPVECPLWILAVATAFSVIFAKEVFGGTGMNIFNPALITRAFLFFAYPTKMSGDAVWVSTDSIFGIGGGQVVDGFTGATMLGQAATAAPGASELINVNGTPATMWDMVVGLIPGSIGETSVIAIALGAIILLWTGVASWKTMFSVFAGGIVMGLIFNVFGSTDNMMAQLPWYEHIVLGGFCFGAVFMATDPVTSARTEKGKFIYGFLIGVMAIVIRVLNPGYPEGMMLAILLMNIFAPLIDYCIVQKNITARENRLKS…
3362	GC_00000431		PV2SA01	1668	5	5	1	1	1	1	1	COG1805	Na+-transporting NADH:ubiquinone oxidoreductase, subunit NqrB (NqrB) (PDB:4P6V)	COG1805	Na+-translocating NADH dehydrogenase	C	Energy production and conversion	MKALRNYLDKIKPNFEEGGKLHAFRSVFDGFETFLFVPNSTSKTGVHIHDAIDSKRIMSMVVIALIPALLFGMYNVGYQHFLAVGQEAGFFEKFIYGFLAVLPKIIVSYVVGLGIEFVVAQWKNEEIQEGFLVSGLLIPMIVPVECPLWILAVATAFSVIFAKEVFGGTGMNIFNPALITRAFLFFAYPTKMSGDAVWVSTDSIFGIGGGQVVDGFTGATMLGQAATAAPGASELINVNGTPATMWDMVVGLIPGSIGETSVIAIALGAIILLWTGVASWKTMFSVFAGGIVMGLIFNVFGSTDNMMAQLPWYEHIVLGGFCFGAVFMATDPVTSARTEKGKFIYGFLIGVMAIVIRVLNPGYPEGMMLAILLMNIFAPLIDYCIVQKNITARENRLKS…
3363	GC_00000431		PV2SA02	2343	5	5	1	1	1	1	1	COG1805	Na+-transporting NADH:ubiquinone oxidoreductase, subunit NqrB (NqrB) (PDB:4P6V)	COG1805	Na+-translocating NADH dehydrogenase	C	Energy production and conversion	MKALRNYLDKIKPNFEEGGKLHAFRSVFDGFETFLFVPNSTSKTGVHIHDAIDSKRIMSMVVIALIPALLFGMYNVGYQHFLAVGQEAGFFEKFIYGFLAVLPKIIVSYVVGLGIEFVVAQWKNEEIQEGFLVSGLLIPMIVPVECPLWILAVATAFSVIFAKEVFGGTGMNIFNPALITRAFLFFAYPTKMSGDAVWVSTDSIFGIGGGQVVDGFTGATMLGQAATAAPGASELINVNGTPATMWDMVVGLIPGSIGETSVIAIALGAIILLWTGVASWKTMFSVFAGGIVMGLIFNVFGSTDNMMAQLPWYEHIVLGGFCFGAVFMATDPVTSARTEKGKFIYGFLIGVMAIVIRVLNPGYPEGMMLAILLMNIFAPLIDYCIVQKNITARENRLKS…
4814	GC_00000722		PV10SA01	2175	5	5	1	1	1	1	1	COG1726	Na+-transporting NADH:ubiquinone oxidoreductase, subunit NqrA (NqrA) (PDB:4P6V)	COG1726	Na+-translocating NADH dehydrogenase	C	Energy production and conversion	MANVIKLHKGLNINLKGKPAQEFFDVKQPDIYAIVPDDFHGVTPKVVVKEQEYVTAGGTLFVDKNHPEVKFVSPVSGVVTSVERGERRKVLSISIAAAKEQDYEEFGKKDVSTLTGEQVKAALLEAGLFSFIIQRPYIVVADPNAKPKGIFVSAFDTNPLAADFEFVLKGQEKDFQTGLDALAKMAKTYLNISVEQKSPALTNAKNVTVTAFDGPNPAGNVGVQINHISPINKGETVWTLRAEEVIFIGRLFNTGRVDLTRTIALTGSEVKKPAYCKLKVGALLTDIFAGRVNGGKNLRYINGNVLTGTLVKPNGFLGAHATSLTVIPEGDDRHEFLGFIMPRTDQYSANRSYFSWLCGNKEYTLDARIKGGERHMIMSGEYDKVFPMSIFPEYLIKAI…
4815	GC_00000722		PV26FA01	3815	5	5	1	1	1	1	1	COG1726	Na+-transporting NADH:ubiquinone oxidoreductase, subunit NqrA (NqrA) (PDB:4P6V)	COG1726	Na+-translocating NADH dehydrogenase	C	Energy production and conversion	MANVIKLHKGLNINLKGKPAQEFFDVKQPDIYAIVPDDFHGVTPKVVVKEQEYVTAGGTLFVDKNHPEVKFVSPVSGVVTSVERGERRKVLSISIAAAKEQDYEEFGKKDVSTLTGEQVKAALLEAGLFSFIIQRPYIVVADPNAKPKGIFVSAFDTNPLAADFEFVLKGQEKDFQTGLDALAKMAKTYLNISVEQKSPALTNAKNVTVTAFDGPNPAGNVGVQINHISPINKGETVWTLRAEEVIFIGRLFNTGRVDLTRTIALTGSEVKKPAYCKLKVGALLTDIFAGRVNGGKNLRYINGNVLTGTLVKPNGFLGAHATSLTVIPEGDDRHEFLGFIMPRTDQYSANRSYFSWLCGNKEYTLDARIKGGERHMIMSGEYDKVFPMSIFPEYLIKAI…
4816	GC_00000722		PV29FA01	1217	5	5	1	1	1	1	1	COG1726	Na+-transporting NADH:ubiquinone oxidoreductase, subunit NqrA (NqrA) (PDB:4P6V)	COG1726	Na+-translocating NADH dehydrogenase	C	Energy production and conversion	MANVIKLHKGLNINLKGKPAQEFFDVKQPDIYAIVPDDFHGVTPKVVVKEQEYVTAGGTLFVDKNHPEVKFVSPVSGVVTSVERGERRKVLSISIAAAKEQDYEEFGKKDVSTLTGEQVKAALLEAGLFSFIIQRPYIVVADPNAKPKGIFVSAFDTNPLAADFEFVLKGQEKDFQTGLDALAKMAKTYLNISVEQKSPALTNAKNVTVTAFDGPNPAGNVGVQINHISPINKGETVWTLRAEEVIFIGRLFNTGRVDLTRTIALTGSEVKKPAYCKLKVGALLTDIFAGRVNGGKNLRYINGNVLTGTLVKPNGFLGAHATSLTVIPEGDDRHEFLGFIMPRTDQYSANRSYFSWLCGNKEYTLDARIKGGERHMIMSGEYDKVFPMSIFPEYLIKAI…
4817	GC_00000722		PV2SA01	1669	5	5	1	1	1	1	1	COG1726	Na+-transporting NADH:ubiquinone oxidoreductase, subunit NqrA (NqrA) (PDB:4P6V)	COG1726	Na+-translocating NADH dehydrogenase	C	Energy production and conversion	MANVIKLHKGLNINLKGKPAQEFFDVKQPDIYAIVPDDFHGVTPKVVVKEQEYVTAGGTLFVDKNHPEVKFVSPVSGVVTSVERGERRKVLSISIAAAKEQDYEEFGKKDVSTLTGEQVKAALLEAGLFSFIIQRPYIVVADPNAKPKGIFVSAFDTNPLAADFEFVLKGQEKDFQTGLDALAKMAKTYLNISVEQKSPALTNAKNVTVTAFDGPNPAGNVGVQINHISPINKGETVWTLRAEEVIFIGRLFNTGRVDLTRTIALTGSEVKKPAYCKLKVGALLTDIFAGRVNGGKNLRYINGNVLTGTLVKPNGFLGAHATSLTVIPEGDDRHEFLGFIMPRTDQYSANRSYFSWLCGNKEYTLDARIKGGERHMIMSGEYDKVFPMSIFPEYLIKAI…
4818	GC_00000722		PV2SA02	2344	5	5	1	1	1	1	1	COG1726	Na+-transporting NADH:ubiquinone oxidoreductase, subunit NqrA (NqrA) (PDB:4P6V)	COG1726	Na+-translocating NADH dehydrogenase	C	Energy production and conversion	MANVIKLHKGLNINLKGKPAQEFFDVKQPDIYAIVPDDFHGVTPKVVVKEQEYVTAGGTLFVDKNHPEVKFVSPVSGVVTSVERGERRKVLSISIAAAKEQDYEEFGKKDVSTLTGEQVKAALLEAGLFSFIIQRPYIVVADPNAKPKGIFVSAFDTNPLAADFEFVLKGQEKDFQTGLDALAKMAKTYLNISVEQKSPALTNAKNVTVTAFDGPNPAGNVGVQINHISPINKGETVWTLRAEEVIFIGRLFNTGRVDLTRTIALTGSEVKKPAYCKLKVGALLTDIFAGRVNGGKNLRYINGNVLTGTLVKPNGFLGAHATSLTVIPEGDDRHEFLGFIMPRTDQYSANRSYFSWLCGNKEYTLDARIKGGERHMIMSGEYDKVFPMSIFPEYLIKAI…
18702	GC_00003830	FAST	PV26FA01	829	2	2	1	0	1	1	1	COG1436	Archaeal/vacuolar-type H+-ATPase subunit F/Vma7 (NtpF) (PDB:2D00)	COG1436	A/V-type ATP synthase	C	Energy production and conversion	MKNKFVKYILSVAVASCMTGCFDLDHEEFYNIDADGFPKSEAELDASIVGVYNTLADSYIQSGMDNCGAILNMLPTDEMNTSWEHTWRQQDRFLWTANDCTAPENVYFKYQRGVTKATRIIDALEKADIAEAKKKRGMAELRVLRVLYMQLLHSLFGPVPVVIDPKVANDVSVEWKPSRPTEDEMLSYMVKEIEESYRDLAVVPSAADWGHFTQGAALTLLMKIYMGAKQFDKVNQVADEIIGLGTYELLPDYKAVFDINNEGVTHKEAIFVIGQTTSNAKYAWTWFACVMPSSPLYAGTYLKTIWGGLKMPWTFYDKYEEQDKRLETIVRYYTDTDGNKVDYRQVDHPKATGAAPMKYSEDPEQKGERQSNDFIMFRYADVLLAKAEAMNELNGPSEE…
18703	GC_00003830	FAST	PV29FA01	2500	2	2	1	0	1	1	1	COG1436	Archaeal/vacuolar-type H+-ATPase subunit F/Vma7 (NtpF) (PDB:2D00)	COG1436	A/V-type ATP synthase	C	Energy production and conversion	MKNKFVKYILSVAVASCMTGCFDLDHEEFYNIDADGFPKSEAELDASIVGVYNTLADSYIQSGMDNCGAILNMLPTDEMNTSWEHTWRQQDRFLWTANDCTAPENVYFKYQRGVTKATRIIDALEKADIAEAKKKRGMAELRVLRVLYMQLLHSLFGPVPVVIDPKVANDVSVEWKPSRPTEDEMLSYMVKEIEESYRDLAVVPSAADWGHFTQGAALTLLMKIYMGAKQFDKVNQVADEIIGLGTYELLPDYKAVFDINNEGVTHKEAIFVIGQTTSNAKYAWTWFACVMPSSPLYAGTYLKTIWGGLKMPWTFYDKYEEQDKRLETIVRYYTDTDGNKVDYRQVDHPKATGAAPMKYSEDPEQKGERQSNDFIMFRYADVLLAKAEAMNELNGPSEE…
18946	GC_00003961	FAST	PV26FA01	1605	2	2	1	0	1	1	1	COG1436	Archaeal/vacuolar-type H+-ATPase subunit F/Vma7 (NtpF) (PDB:2D00)	COG1436	A/V-type ATP synthase	C	Energy production and conversion	MKNSIKLITWLVGGLFTFSSCTDLDVDLKSTYTEYPDSEIAKEAKMAGLYYGFGGALGRRYMEAALLSSDEFMAVTFGGNWYDGGNYIHSSLHASLPGDAHVDWAGDIPAAITKCNQAIFDLGGEDENNAEQEALIAPALAMRAFYHFIFMDTFGATPKLDHLIGDSEAIDRSPRSEITKFIESDLLRALASGGLKEDVDASTYGKPTKWMAEALLAKLYINWAVYTCDDVATYDPSMTNSKLNDVIKYCDDIIASGHFNLSDGYRKKFMPDNGYQIKDFIYAMPYQNNETSTRANTYARFQFWPKFNNDGADGKGLFGITLSKNAGGVFIVTPEAADRFCLEGDERNDIIMKGAINYYDISTHTMGTEPYIYNGQQVVLTKNITILNDQMDLGNDLNA…
18947	GC_00003961	FAST	PV29FA01	3908	2	2	1	0	1	1	1	COG1436	Archaeal/vacuolar-type H+-ATPase subunit F/Vma7 (NtpF) (PDB:2D00)	COG1436	A/V-type ATP synthase	C	Energy production and conversion	MKNSIKLITWLVGGLFTFSSCTDLDVDLKSTYTEYPDSEIAKEAKMAGLYYGFGGALGRRYMEAALLSSDEFMAVTFGGNWYDGGNYIHSSLHASLPGDAHVDWAGDIPAAITKCNQAIFDLGGEDENNAEQEALIAPALAMRAFYHFIFMDTFGATPKLDHLIGDSEAIDRSPRSEITKFIESDLLRALASGGLKEDVDASTYGKPTKWMAEALLAKLYINWAVYTCDDVATYDPSMTNSKLNDVIKYCDDIIASGHFNLSDGYRKKFMPDNGYQIKDFIYAMPYQNNETSTRANTYARFQFWPKFNNDGADGKGLFGITLSKNAGGVFIVTPEAADRFCLEGDERNDIIMKGAINYYDISTHTMGTEPYIYNGQQVVLTKNITILNDQMDLGNDLNA…
8989	GC_00001559		PV10SA01	742	5	5	1	1	0.999742	1	0.999871	COG1436	Archaeal/vacuolar-type H+-ATPase subunit F/Vma7 (NtpF) (PDB:2D00)	COG1436	A/V-type ATP synthase	C	Energy production and conversion	MRLKYNFIGLILACGLGLSSCNDSFLDRNPKDQLSDASFWKNAEDAQKFATGIYLYLIEPENHTIMTDCYTDNAIPVHVTAEQGQLSAGTATSSNPHFLQLWKNAYQCIRRCLVFYEHIGDVPMDEKEKAQLTAEVQFLEAFSYANILKYMGGASLLDHPLELNEKLPSRSSEEETYNHIVGLLDKAAASLPDIRSNSDHGKPSAGACYALKARVAFYAHKYDVAEAAARKVMGMNVYGLYDNYGDLFQPVAELCNEIIFDREYLENPKNSNEGSYIGQFFAPVMMGGWEALSPTQDLIDSYPCKDGKSIKESPFYNPEDPFADRDPRLGFSVLWNGSQIAGKTFNLNNMGDGSHTRTGYSMKKYINPDNDGINNYDWTNFIYIRYAEVLLTFAEARNE…
8990	GC_00001559		PV26FA01	1234	5	5	1	1	0.999742	1	0.999871	COG1436	Archaeal/vacuolar-type H+-ATPase subunit F/Vma7 (NtpF) (PDB:2D00)	COG1436	A/V-type ATP synthase	C	Energy production and conversion	MRLKYNFIGLILACGLGLSSCNDSFLDRNPKDQLSDASFWKNAEDAQKFATGIYLYLIEPENHTIMTDCYTDNAIPVHVTAEQGQLSAGTATSSNPHFLQLWKNAYQCIRRCLVFYEHIGDVPMDEKEKAQLTAEVQFLEAFSYANILKYMGGASLLDHPLELNEKLPSRSSEEETYNHIVGLLDKAAASLPDIRSNSDHGKPSAGACYALKARVAFYAHKYDVAEAAARKVMGMNVYGLYDNYGDLFQPVAELCNEIIFDREYLENPKNSNEGSYIGQFFAPVMMGGWEALSPTQDLIDSYPCKDGKSIKESPFYNPEDPFADRDPRLGFSVLWNGSQIAGKTFNLNNMGDGSHTRTGYSMKKYINPDNDGINNYDWTNFIYIRYAEVLLTFAEARNE…
8991	GC_00001559		PV29FA01	2909	5	5	1	1	0.999742	1	0.999871	COG1436	Archaeal/vacuolar-type H+-ATPase subunit F/Vma7 (NtpF) (PDB:2D00)	COG1436	A/V-type ATP synthase	C	Energy production and conversion	MRLKYNFIGLILACGLGMSSCNDSFLDRNPKDQLSDASFWKNAEDAQKFATGIYLYLIEPENHTIMTDCYTDNAIPVHVTAEQGQLSAGTATSSNPHFLQLWKNAYQCIRRCLVFYEHIGDVPMDEKEKAQLTAEVQFLEAFSYANILKYMGGASLLDHPLELNEKLPSRSSEEETYNHIVGLLDKAAASLPDIRSNSDHGKPSAGACYALKARVAFYAHKYDVAEAAARKVMGMNVYGLYDNYGDLFQPVAELCNEIIFDREYLENPKNSNEGSYIGQFFAPVMMGGWEALSPTQDLIDSYPCKDGKSIKESPFYNPEDPFADRDPRLGFSVLWNGSQIAGKTFNLNNMGDGSHTRTGYSMKKYINPDNDGINNYDWTNFIYIRYAEVLLTFAEARNE…
8992	GC_00001559		PV2SA01	76	5	5	1	1	0.999742	1	0.999871	COG1436	Archaeal/vacuolar-type H+-ATPase subunit F/Vma7 (NtpF) (PDB:2D00)	COG1436	A/V-type ATP synthase	C	Energy production and conversion	MRLKYNFIGLILACGLGLSSCNDSFLDRNPKDQLSDASFWKNAEDAQKFATGIYLYLIEPENHTIMTDCYTDNAIPVHVTAEQGQLSAGTATSSNPHFLQLWKNAYQCIRRCLVFYEHIGDVPMDEKEKAQLTAEVQFLEAFSYANILKYMGGASLLDHPLELNEKLPSRSSEEETYNHIVGLLDKAAASLPDIRSNSDHGKPSAGACYALKARVAFYAHKYDVAEAAARKVMGMNVYGLYDNYGDLFQPVAELCNEIIFDREYLENPKNSNEGSYIGQFFAPVMMGGWEALSPTQDLIDSYPCKDGKSIKESPFYNPEDPFADRDPRLGFSVLWNGSQIAGKTFNLNNMGDGSHTRTGYSMKKYINPDNDGINNYDWTNFIYIRYAEVLLTFAEARNE…
8993	GC_00001559		PV2SA02	751	5	5	1	1	0.999742	1	0.999871	COG1436	Archaeal/vacuolar-type H+-ATPase subunit F/Vma7 (NtpF) (PDB:2D00)	COG1436	A/V-type ATP synthase	C	Energy production and conversion	MRLKYNFIGLILACGLGLSSCNDSFLDRNPKDQLSDASFWKNAEDAQKFATGIYLYLIEPENHTIMTDCYTDNAIPVHVTAEQGQLSAGTATSSNPHFLQLWKNAYQCIRRCLVFYEHIGDVPMDEKEKAQLTAEVQFLEAFSYANILKYMGGASLLDHPLELNEKLPSRSSEEETYNHIVGLLDKAAASLPDIRSNSDHGKPSAGACYALKARVAFYAHKYDVAEAAARKVMGMNVYGLYDNYGDLFQPVAELCNEIIFDREYLENPKNSNEGSYIGQFFAPVMMGGWEALSPTQDLIDSYPCKDGKSIKESPFYNPEDPFADRDPRLGFSVLWNGSQIAGKTFNLNNMGDGSHTRTGYSMKKYINPDNDGINNYDWTNFIYIRYAEVLLTFAEARNE…
11544	GC_00002070		PV10SA01	4086	5	5	1	1	0.998416	1	0.999207	COG1436	Archaeal/vacuolar-type H+-ATPase subunit F/Vma7 (NtpF) (PDB:2D00)	COG1436	A/V-type ATP synthase	C	Energy production and conversion	MKKLLYIASICIASLFSACDDYLTVESPDQLTSSSFWRNQSDAEAGLAAAYSQLYLMTYSGDMWSFPEIKWPVEAYREDIIQLGSDALNYPNWVELGNYTYTNGNSQFSYYWQCYYKGISFANQVIEKTAEIPDENIDAATREQLVNEGYFIRAYYHMQLLLNWKEIIVRDKYITDPAELSKPLSSREDAWNFIIEDLKRATSLPATRDADNVGRATSGSAYAYLGFAYLTRAYEEATNKDSYLASAIEAFNQVKGYELVNNFSTMFSGDNKNSKESIFEIQFSMSSANGATYRTQFHRWIGVSELGGWDEILPSQTLISEFKKEGETATTGRYDSRMYATLFFNCDYYNDGNGRVYGYDYNDWFDNKERVAFRKFMPSTYEGLNQNYSAINVPLMRYA…
11545	GC_00002070		PV26FA01	2125	5	5	1	1	0.998416	1	0.999207	COG1436	Archaeal/vacuolar-type H+-ATPase subunit F/Vma7 (NtpF) (PDB:2D00)	COG1436	A/V-type ATP synthase	C	Energy production and conversion	MKKLLYIASICIASLFSACDDYLTVESPDQLTSSSFWRNQSDAEAGLAAAYSQLYLMTYSGDMWSFPEIKWPVEAYREDIIQLGSDALNYPNWVELGNYTYTNGNSQFSYYWQCYYKGISFANQVIEKTAEIPDENIDAATREQLVNEGYFIRAYYHMQLLLNWKEIIVRDKYITDPAELSKPLSSREDAWNFIIEDLKRATSLPATRDADNVGRATSGSAYAYLGFAYLTRAYEEATNKDSYLASAIEALNQVKGYELVNNFSTMFSGDNKNSKESIFEIQFSMSSANGATYRTQFHRWIGVSELGGWDEILPSQTLISEFKKEGETATTGRYDSRMYATLFFNCDYYNDGNGRVYGYDYNDWFDNKERVAFRKFMPSTYEGLNQNYSAINVPLMRYA…
11546	GC_00002070		PV29FA01	3345	5	5	1	1	0.998416	1	0.999207	COG1436	Archaeal/vacuolar-type H+-ATPase subunit F/Vma7 (NtpF) (PDB:2D00)	COG1436	A/V-type ATP synthase	C	Energy production and conversion	MKKLLYIASICIASLFSACDDYLTVESPDQLTSSSFWRNQSDAEAGLAAAYSQLYLMTYSGDMWSFPEIKWPVEAYREDIIQLGSDALNYPNWVELGNYTYTNGNSQFSYYWQCYYKGISFANQVIEKTAEIPDENIDAATREQLVNEGYFIRAYYHMQLLLNWKEIIVRDKYITDPTELSKPLSSREDAWNFIIEDLKRATSLPATRDADNVGRATSGSAYAYLGFAYLTRAYEEATNKDSYLASAIEAFNQVKGYELVNNFSTMFSGDNKNSKESIFEIQFSMSSANGATYRTQFHRWIGVSELGGWDEILPSQTLISEFKKEGETATTGRYDSRMYATLFFNCDYYNDGNGRVYGYDYNDWFDNKERVAFRKFMPSTYEGLNQNYSAINVPLMRYA…
11547	GC_00002070		PV2SA01	3392	5	5	1	1	0.998416	1	0.999207	COG1436	Archaeal/vacuolar-type H+-ATPase subunit F/Vma7 (NtpF) (PDB:2D00)	COG1436	A/V-type ATP synthase	C	Energy production and conversion	MKKLLYIASICIASLFSACDDYLTVESPDQLTSSSFWRNQSDAEAGLAAAYSQLYLMTYSGDMWSFPEIKWPVEAYREDIIQLGSDALNYPNWVELGNYTYTNGNSQFSYYWQCYYKGISFANQVIEKTAEIPDENIDAATREQLVNEGYFIRAYYHMQLLLNWKEIIVRDKYITDPAELSKPLSSREDAWNFIIEDLKRATSLPATRDADNVGRATSGSAYAYLGFAYLTRAYEEATNKDSYLASAIEAFNQVKGYELVNNFSTMFSGDNKNSKESIFEIQFSMSSANGATYRTQFHRWIGVSELGGWDEILPSQTLISEFKKEGETATTGRYDSRMYATLFFNCDYYNDGNGRVYGYDYNDWFDNKERVAFRKFMPSTYEGLNQNYSAINVPLMRYA…
11548	GC_00002070		PV2SA02	4067	5	5	1	1	0.998416	1	0.999207	COG1436	Archaeal/vacuolar-type H+-ATPase subunit F/Vma7 (NtpF) (PDB:2D00)	COG1436	A/V-type ATP synthase	C	Energy production and conversion	MKKLLYIASICIASLFSACDDYLTVESPDQLTSSSFWRNQSDAEAGLAAAYSQLYLMTYSGDMWSFPEIKWPVEAYREDIIQLGSDALNYPNWVELGNYTYTNGNSQFSYYWQCYYKGISFANQVIEKTAEIPDENIDAATREQLVNEGYFIRAYYHMQLLLNWKEIIVRDKYITDPAELSKPLSSREDAWNFIIEDLKRATSLPATRDADNVGRATSGSAYAYLGFAYLTRAYEEATNKDSYLASAIEAFNQVKGYELVNNFSTMFSGDNKNSKESIFEIQFSMSSANGATYRTQFHRWIGVSELGGWDEILPSQTLISEFKKEGETATTGRYDSRMYATLFFNCDYYNDGNGRVYGYDYNDWFDNKERVAFRKFMPSTYEGLNQNYSAINVPLMRYA…
16036	GC_00002983		PV10SA01	917	4	4	1	0	0.999566	1	0.999783	COG1436	Archaeal/vacuolar-type H+-ATPase subunit F/Vma7 (NtpF) (PDB:2D00)	COG1436	A/V-type ATP synthase	C	Energy production and conversion	MKKIFTVITLIFLFCNVFTSCNNSFLDEVPNHQLSDVSFWKTEDDVYKYTIGLYRYTLAPENHAIMTDCYTDNAVPVHVTAAQGELSSGTATSTNSYFQQVWKQAFQGIRRCNIGLENIDKVNMDKKKQNVFRGEIYFLRGFFYATLLKLYGGVPLLKTTLSFSDPIPSRSSEEDVYNFIISDLDSAATLLPITQEEVGRATKGAAIAEKAIISNFMNKYKEAAKYAKELITLGIYDLHPNYAELFLPTYENNVEVIFDRQYMENAKDKSLGSDIDQFFAPQMMGGWEAVSPTKDLIDTYECIDGKSIQESPLYDENNPFLNRDPRLEYSILHDGSVIADKIFSSEGRVGDGNSTRTGYSMRKYINPANDGMNYLGWTNFIYIRYAEILLVYAEALNEI…
16037	GC_00002983		PV26FA01	4080	4	4	1	0	0.999566	1	0.999783	COG1436	Archaeal/vacuolar-type H+-ATPase subunit F/Vma7 (NtpF) (PDB:2D00)	COG1436	A/V-type ATP synthase	C	Energy production and conversion	MKKIFTVITLIFLFCNVFTSCNNSFLDEVPNHQLSDVSFWKTEDDVYKYTIGLYRYTLAPENHAIMTDCYTDNAVPVHVTAAQGELSSGTATSTNSYFQQVWKQAFQGIRRCNIGLENIDKVNMDKKKQNVFRGEIYFLRGFFYATLLKLYGGVPLLKTTLSFSDPIPSRSSEEDVYNFIISDLDSAATLLPITQEEVGRATKGAAIAEKAIISNFMNKYKEAAKYAKELITLGIYDLHPNYAELFLPTYENNVEVIFDRQYMENAKDKSLGSDIDQFFAPQMMGGWEAVSPTKDLIDTYECIDGKSIQESPLYDENNPFLNRDPRLEYSILHDGSVIADKIFSSEGRVGDGNSTRTGYSMRKYINPANDGMNYLGWTNFIYIRYAEILLVYAEALNEI…
16038	GC_00002983		PV2SA01	2780	4	4	1	0	0.999566	1	0.999783	COG1436	Archaeal/vacuolar-type H+-ATPase subunit F/Vma7 (NtpF) (PDB:2D00)	COG1436	A/V-type ATP synthase	C	Energy production and conversion	MKKIFTVMTLIFLFCNVFTSCNNSFLDEVPNHQLSDVSFWKTEDDVYKYTIGLYRYTLAPENHAIMTDCYTDNAVPVHVTAAQGELSSGTATSTNSYFQQVWKQAFQGIRRCNIGLENIDKVNMDKKKQNVFRGEIYFLRGFFYATLLKLYGGVPLLKTTLSFSDPIPSRSSEEDVYNFIISDLDSAATLLPITQEEVGRATKGAAIAEKAIISNFMNKYKEAAKYAKELITLGIYDLHPNYAELFLPTYENNVEVIFDRQYMENAKDKSLGSDIDQFFAPQMMGGWEAVSPTKDLIDTYECIDGKSIQESPLYDENNPFLNRDPRLEYSILHDGSVIADKIFSSEGRVGDGNSTRTGYSMRKYINPANDGMNYLGWTNFIYIRYAEILLVYAEALNEI…
16039	GC_00002983		PV2SA02	3456	4	4	1	0	0.999566	1	0.999783	COG1436	Archaeal/vacuolar-type H+-ATPase subunit F/Vma7 (NtpF) (PDB:2D00)	COG1436	A/V-type ATP synthase	C	Energy production and conversion	MKKIFTVMTLIFLFCNVFTSCNNSFLDEVPNHQLSDVSFWKTEDDVYKYTIGLYRYTLAPENHAIMTDCYTDNAVPVHVTAAQGELSSGTATSTNSYFQQVWKQAFQGIRRCNIGLENIDKVNMDKKKQNVFRGEIYFLRGFFYATLLKLYGGVPLLKTTLSFSDPIPSRSSEEDVYNFIISDLDSAATLLPITQEEVGRATKGAAIAEKAIISNFMNKYKEAAKYAKELITLGIYDLHPNYAELFLPTYENNVEVIFDRQYMENAKDKSLGSDIDQFFAPQMMGGWEAVSPTKDLIDTYECIDGKSIQESPLYDENNPFLNRDPRLEYSILHDGSVIADKIFSSEGRVGDGNSTRTGYSMRKYINPANDGMNYLGWTNFIYIRYAEILLVYAEALNEI…
16124	GC_00003005		PV26FA01	1348	4	4	1	0	0.999072	1	0.999536	COG1436	Archaeal/vacuolar-type H+-ATPase subunit F/Vma7 (NtpF) (PDB:2D00)	COG1436	A/V-type ATP synthase	C	Energy production and conversion	MKSINNFIGLALLSGALLTSCSDSFLQRDSLTESSSNTFWQTPDDALMALASCYDALQSNQLYNSDQYSLGPLYMDCISDNGGHFNWSGWMEGYDMAMGIHTPSSSIIGSYWKDCYEVISRCNVLIANIDRVDMDASQKAIYQAEAKTIRALMYINLTMTYQDVPFLTAPLTIDEAECEKTDRAAIVAHVMTDLQDAAEVLPQNASSRGHITKGAALSLLGRVALYNEKWDDAIAAYKQVQGLGYSLDPSYAKLFTQSGETSPEIIFAVRYEGPGMSEGAAFNAHWNTPLEAMNGTIDLADAYYCKDGKPTTDTKIAELNGGGGLDVSKPNPAHFENRDPRLYSTLFVPGMLWNGKGGIDTSASNPYANVYGGAAASLSTVYVYKYFDPTDTSNSWDNG…
16125	GC_00003005		PV29FA01	3014	4	4	1	0	0.999072	1	0.999536	COG1436	Archaeal/vacuolar-type H+-ATPase subunit F/Vma7 (NtpF) (PDB:2D00)	COG1436	A/V-type ATP synthase	C	Energy production and conversion	MKSINNFIGLALLSGALLTSCSDSFLQRDSLTESSSNTFWQTPDDALMALASCYDALQSNQLYNSDQYSLGPLYMDCISDNGGHFNWSGWMEGYDMAMGIHTPSSSIIGSYWKDCYEVISRCNVLIANIDRVDMDASQKAIYQAEAKTIRALMYINLTMTYQDVPFLTAPLTIDEAECEKTDRAAIVAHVMTDLQDAAEVLPQNASSRGHITKGAALSLLGRVALYNEKWDDAIAAYKQVQGLGYSLDPSYAKLFTQSGETSPEIIFAVRYEGPGMSGGAAFNAHWNTPLEAMNGTIDLADAYYCKDGKPTTDTKIAELNGGGGLDVSKPNPAHFENRDPRLYSTLFVPGMLWNGKGGIDTSASNPYANVYGGAAASLSTVYVYKYFDPTDTSNSWDNG…
16126	GC_00003005		PV2SA01	3521	4	4	1	0	0.999072	1	0.999536	COG1436	Archaeal/vacuolar-type H+-ATPase subunit F/Vma7 (NtpF) (PDB:2D00)	COG1436	A/V-type ATP synthase	C	Energy production and conversion	MKSINNFIGLALLSGALLTSCSDSFLQRDSLTESSSNTFWQTPDDALMALASCYDALQSNQLYNSDQYSLGPLYMDCISDNGGHFNWSGWMEGYDMAMGIHTPSSSIIGSYWKDCYEVISRCNVLIANIDRVDMDASQKAIYQAEAKTIRALMYINLTMTYQDVPFLTAPLTIDEAECEKTDRAAIVAHVMTDLQDAAEVLPQNASSRGHITKGAALSLLGRVALYNEKWDDAIAAYKQVQGLGYSLDPSYAKLFTQSGETSPEIIFAVRYEGPGMSEGAAFNAHWNTPLEAMNGTIDLADAYYCKDGKPTTDTKIAELNGGGGLDVSKPNPAHFENRDPRLYSTLFVPGMLWNGKGGIDTSASNPYANVYGGAAASLSTVYVYKYFDPTDTSNSWDNG…
16127	GC_00003005		PV2SA02	646	4	4	1	0	0.999072	1	0.999536	COG1436	Archaeal/vacuolar-type H+-ATPase subunit F/Vma7 (NtpF) (PDB:2D00)	COG1436	A/V-type ATP synthase	C	Energy production and conversion	MKSINNFIGLALLSGALLTSCSDSFLQRDSLTESSSNTFWQTPDDALMALASCYDALQSNQLYNSDQYSLGPLYMDCISDNGGHFNWSGWMEGYDMAMGIHTPSSSIIGSYWKDCYEVISRCNVLIANIDRVDMDASQKAIYQAEAKTIRALMYINLTMTYQDVPFLTAPLTIDEAECEKTDRAAIVAHVMTDLQDAAEVLPQNASSRGHITKGAALSLLGRVALYNEKWDDAIAAYKQVQGLGYSLDPSYAKLFTQSGETSPEIIFAVRYEGPGMSEGAAFNAHWNTPLEAMNGTIDLADAYYCKDGKPTTDTKIAELNGGGGLDVSKPNPAHFENRDPRLYSTLFVPGMLWNGKGGIDTSASNPYANVYGGAAASLSTVYVYKYFDPTDTSNSWDNG…
16160	GC_00003014		PV10SA01	3529	4	4	1	0	0.99633	1	0.998162	COG1436	Archaeal/vacuolar-type H+-ATPase subunit F/Vma7 (NtpF) (PDB:2D00)	COG1436	A/V-type ATP synthase	C	Energy production and conversion	MKNIYLSLISGFLFTACSLDRVPYDALSTATFPKTEADVEMLAVGCYDGYANQDYTIYNDVFSDNGYCAINTNWAVFANGTATHAVPGINWYDYTLITRCNNFLHQVTTKEIHFNDPKRLEVLKNEVRFLRAWRYYMMVTAYGDIPLITEVVPSLEDAKLPATPEADVVKFILDELNDITKDGALDVSPKQKGRITRGAALALKVRLCLFYKKYDEVIDAANEIKSLGVYNLYQEGEVPYSELFKEANEDNCEIILAVKKVMNDYKNQTIIEFCNVIDGGWSAFVPIQSLIDAYEMKDGLTIEEAQAIGKYNPEHPYKDRDPRFYATILYSGADWMDNKGRKRIYNTLDRNINGEPNKDHRLDSRNASQTSYSVCKYMKPLTQYSDINNTGLDMIVFRY…
16161	GC_00003014		PV26FA01	2867	4	4	1	0	0.99633	1	0.998162	COG1436	Archaeal/vacuolar-type H+-ATPase subunit F/Vma7 (NtpF) (PDB:2D00)	COG1436	A/V-type ATP synthase	C	Energy production and conversion	MKNIYLSLISGFLFTACSLDRVPYDALSTATFPKTEADVEMLAVGCYDGYANQDYTIYNDVFSDNGYCAINTNWAVFANGTATHAVPGINWYDYTLITRCNNFLHQVTTKEIHFNDPQRLEVLKNEVRFLRAWRYYMMVTAYGDIPLITEVVPSLEDAKLPATPEADVVKFILDELNDITKDGALDVNPKQKGRITRGAALALKVRLCLFYKKYDEVIDAANEIKSLGVYDLYQEGEVPYSELFKEANEDNCEIILAVKKVMNDYKNQTIIEFCNVIDGGWSAFVPIQSLIDAYEMKDGLTIEEAQAKGKYNPEHPYKDRDPRFYATILYSGADWMDNKGRKRIYNTLDRNINGEPNKDHRLDSRNASQTSYSVCKYMKPLTQYSDINNTGLDMIVFRY…
16162	GC_00003014		PV2SA01	2908	4	4	1	0	0.99633	1	0.998162	COG1436	Archaeal/vacuolar-type H+-ATPase subunit F/Vma7 (NtpF) (PDB:2D00)	COG1436	A/V-type ATP synthase	C	Energy production and conversion	MKNIYLSLISGFLFTACSLDRVPYDALSTATFPKTEADVEMLAVGCYDGYANQDYTIYNDVFSDNGYCAINTNWAVFANGTATHAVPGINWYDYTLITRCNNFLHQVTTKEIHFNDPKRLEVLKNEVRFLRAWRYYMMVTAYGDIPLITEVVPSLEDAKLPATPEADVVKFILDELNDITKDGALDVSPKQKGRITRGAALALKVRLCLFYKKYDEVIDAANEIKSLGVYNLYQEGEVPYSELFKEANEDNCEIILAVKKVMNDYKNQTIIEFCNVIDGGWSAFVPIQSLIDAYEMKDGLTIEEAQAIGKYNPEHPYKDRDPRFYATILYSGADWMDNKGRKRIYNTLDRNINGEPNKDHRLDSRNASQTSYSVCKYMKPLTQYSDINNTGLDMIVFRY…
16163	GC_00003014		PV2SA02	3583	4	4	1	0	0.99633	1	0.998162	COG1436	Archaeal/vacuolar-type H+-ATPase subunit F/Vma7 (NtpF) (PDB:2D00)	COG1436	A/V-type ATP synthase	C	Energy production and conversion	MKNIYLSLISGFLFTACSLDRVPYDALSTATFPKTEADVEMLAVGCYDGYANQDYTIYNDVFSDNGYCAINTNWAVFANGTATHAVPGINWYDYTLITRCNNFLHQVTTKEIHFNDPKRLEVLKNEVRFLRAWRYYMMVTAYGDIPLITEVVPSLEDAKLPATPEADVVKFILDELNDITKDGALDVSPKQKGRITRGAALALKVRLCLFYKKYDEVIDAANEIKSLGVYNLYQEGEVPYSELFKEANEDNCEIILAVKKVMNDYKNQTIIEFCNVIDGGWSAFVPIQSLIDAYEMKDGLTIEEAQAIGKYNPEHPYKDRDPRFYATILYSGADWMDNKGRKRIYNTLDRNINGEPNKDHRLDSRNASQTSYSVCKYMKPLTQYSDINNTGLDMIVFRY…
16180	GC_00003019		PV26FA01	936	4	4	1	0	0.999703	1	0.999852	COG1436	Archaeal/vacuolar-type H+-ATPase subunit F/Vma7 (NtpF) (PDB:2D00)	COG1436	A/V-type ATP synthase	C	Energy production and conversion	MKNIYNTLGMTKACLCALAVSLVTTGCSDLLDKEPPSAISDGSFWTGEGDAMLALTGCYRFQTGWSHDDFATPQGLLYLDFAGGNGTEKENFSTLMASSNTVATNSNLRWYWGNAYTQIAKYNTFLENITDCPMEESKKEQWSAEVKCLRAYFFLNLAFYYKDVPMPLKTLSVDEANSISQTPQTEVYSQVEKDLKTAIDLLPVQYSSEEYGRFTKGAAKVLLSRLYLAQERWGDAATILRSVIESGIYELDRRNGEDSYEKLFQIGGEYSPEIIFCIMGIKDLYTNSRYQYLYPEAAYGGWHQFSPYNELVKEYFCADGKDIKTSEVYDENDPYVNRDLRLYASIFLPPLGSYEGTKYNDIIYDCFKGANTADSYNKFALFNGYCPKKGCDPSITNNL…
16181	GC_00003019		PV29FA01	2564	4	4	1	0	0.999703	1	0.999852	COG1436	Archaeal/vacuolar-type H+-ATPase subunit F/Vma7 (NtpF) (PDB:2D00)	COG1436	A/V-type ATP synthase	C	Energy production and conversion	MKNIYNTLGMTKACLCALAVSLVTTGCSDLLDKEPPSAISDGSFWTGEGDAMLALTGCYRFQTGWSHDDFATPQGLLYLDFAGGNGTEKENFSTLMASSNTVATNSNLRWYWGNAYTQIAKYNTFLENITDCPMEESKKEQWSAEVKCLRAYFFLNLAFYYKDVPMPLKTLSVDEANSISQTPQTEVYSQVEKDLKTAIDLLPVQYSSEEYGRFTRGAAKVLLSRLYLAQERWGDAATILRSVIESGIYELDRRNGEDSYEKLFQIGGEYSPEIIFCIMGIKDLYTNSRYQYLYPEAAYGGWHQFSPYNELVKEYFCADGKDIKTSEVYDENDPYVNRDLRLYASIFLPPLGSYEGTKYNDIIYDCFKGANTADSYNKFALFNGYCPKKGCDPSITNNL…
16182	GC_00003019		PV2SA01	427	4	4	1	0	0.999703	1	0.999852	COG1436	Archaeal/vacuolar-type H+-ATPase subunit F/Vma7 (NtpF) (PDB:2D00)	COG1436	A/V-type ATP synthase	C	Energy production and conversion	MKNIYNTLGMTKACLCALAVSLVTTGCSDLLDKEPPSAISDGSFWTGEGDAMLALTGCYRFQTGWSHDDFATPQGLLYLDFAGGNGTEKENFSTLMASSNTVATNSNLRWYWGNAYTQIAKYNTFLENITDCPMEESKKEQWSAEVKCLRAYFFLNLAFYYKDVPMPLKTLSVDEANSISQTPQTEVYSQVEKDLKTAIDLLPVQYSSEEYGRFTRGAAKVLLSRLYLAQERWGDAATILRSVIESGIYELDRRNGEDSYEKLFQIGGEYSPEIIFCIMGIKDLYTNSRYQYLYPEAAYGGWHQFSPYNELVKEYFCADGKDIKTSEVYDENDPYVNRDLRLYASIFLPPLGSYEGTKYNDIIYDCFKGANTADSYNKFALFNGYCPKKGCDPSITNNL…
16183	GC_00003019		PV2SA02	1102	4	4	1	0	0.999703	1	0.999852	COG1436	Archaeal/vacuolar-type H+-ATPase subunit F/Vma7 (NtpF) (PDB:2D00)	COG1436	A/V-type ATP synthase	C	Energy production and conversion	MKNIYNTLGMTKACLCALAVSLVTTGCSDLLDKEPPSAISDGSFWTGEGDAMLALTGCYRFQTGWSHDDFATPQGLLYLDFAGGNGTEKENFSTLMASSNTVATNSNLRWYWGNAYTQIAKYNTFLENITDCPMEESKKEQWSAEVKCLRAYFFLNLAFYYKDVPMPLKTLSVDEANSISQTPQTEVYSQVEKDLKTAIDLLPVQYSSEEYGRFTRGAAKVLLSRLYLAQERWGDAATILRSVIESGIYELDRRNGEDSYEKLFQIGGEYSPEIIFCIMGIKDLYTNSRYQYLYPEAAYGGWHQFSPYNELVKEYFCADGKDIKTSEVYDENDPYVNRDLRLYASIFLPPLGSYEGTKYNDIIYDCFKGANTADSYNKFALFNGYCPKKGCDPSITNNL…
16448	GC_00003086		PV10SA01	749	4	4	1	0	0.999592	1	0.999796	COG1436	Archaeal/vacuolar-type H+-ATPase subunit F/Vma7 (NtpF) (PDB:2D00)	COG1436	A/V-type ATP synthase	C	Energy production and conversion	MKTNIKLWTMGLMTAALLGNTACTDLLHESYGQVVSEDYVPKTEEDVSYLVNAAYIPWRETLLQWNGVVRAQELCADQDVLPARDGIGWVDGYIYKRWHQHTWTTEDDGVLQGWERTYNGVNTCNRILSQIEEGVISVDGETKEKLIAELKVLRASYYYILIDLYGNVPIVTDFKDTSLPQQSTRKEVFDFIVKEITENMDLLSETPRGYYYGRFNKWAAHTLLAKMYLNAEVWSGTAQWQKCIDECDIVINYAEKSGEYALENNQKDVFVTHNENSKEIIFALPFDEIYVTGWNDFDFHMYTLAPENQDTYQLTARPWGGVCAVPQFINSFDEDDARLEDNYIQGQQYTYSGEILKRSIDGKPLIYTVDVPSIDQSDVDDGFRWGKFEYATGITNRLS…
16449	GC_00003086		PV29FA01	2896	4	4	1	0	0.999592	1	0.999796	COG1436	Archaeal/vacuolar-type H+-ATPase subunit F/Vma7 (NtpF) (PDB:2D00)	COG1436	A/V-type ATP synthase	C	Energy production and conversion	MKTNIKLWTMGLMTAALLGNTACTDLLHESYGQVVSEDYVPKTEEDVSYLVNAAYIPWRETLLQWNGVVRAQELCADQDVLPARDGIGWVDGYIYKRWHQHTWTTEDDGVLQGWERTYNGVNTCNRILSQIEEGVISVDGETKEKLIAELKVLRASYYYILIDLYGNVPIVTDFKDTSLPQQSTRKEVFDFIVKEITENMDLLSETPRGYYYGRFNKWAAHTLLAKMYLNAEVWSGTAQWQKCIDECDIVINYAEKSGEYALENNQKDVFVTHNENSKEIIFALPFDEIYVTGWNDFDFHMYTLAPENQDTYQLTARPWGGVCAVPQFINSFDEDDARLEDNYIQGQQYTYSGEILKRSIDGKPLIYTVDVPSIDQSDVDDGFRWGKFEYATGITNRLS…
16450	GC_00003086		PV2SA01	83	4	4	1	0	0.999592	1	0.999796	COG1436	Archaeal/vacuolar-type H+-ATPase subunit F/Vma7 (NtpF) (PDB:2D00)	COG1436	A/V-type ATP synthase	C	Energy production and conversion	MKTNIKLWTMGLMTAALLGNTACTDLLHDSYGQVVSEDYVPKTEEDVSYLVNAAYIPWRETLLQWNGVVRAQELCADQDVLPARDGIGWVDGYIYKRWHQHTWTTEDDGVLQGWERTYNGVNTCNRILSQIEEGVISVDGETKEKLIAELKVLRASYYYILIDLYGNVPIVTDFKDTSLPQQSTRKEVFDFIVKEITENMDLLSETPRGYYYGRFNKWAAHTLLAKMYLNAEVWSGTAQWQKCIDECDIVINYAEKSGEYALENNQKDVFVTHNENSKEIIFALPFDEIYVTGWNDFDFHMYTLAPENQDTYQLTARPWGGVCAVPQFINSFDEDDARLEDNYIQGQQYTYSGEILKRSIDGKPLIYTVDVPSIDQSDVDDGFRWGKFEYATGITNRLS…
16451	GC_00003086		PV2SA02	758	4	4	1	0	0.999592	1	0.999796	COG1436	Archaeal/vacuolar-type H+-ATPase subunit F/Vma7 (NtpF) (PDB:2D00)	COG1436	A/V-type ATP synthase	C	Energy production and conversion	MKTNIKLWTMGLMTAALLGNTACTDLLHDSYGQVVSEDYVPKTEEDVSYLVNAAYIPWRETLLQWNGVVRAQELCADQDVLPARDGIGWVDGYIYKRWHQHTWTTEDDGVLQGWERTYNGVNTCNRILSQIEEGVISVDGETKEKLIAELKVLRASYYYILIDLYGNVPIVTDFKDTSLPQQSTRKEVFDFIVKEITENMDLLSETPRGYYYGRFNKWAAHTLLAKMYLNAEVWSGTAQWQKCIDECDIVINYAEKSGEYALENNQKDVFVTHNENSKEIIFALPFDEIYVTGWNDFDFHMYTLAPENQDTYQLTARPWGGVCAVPQFINSFDEDDARLEDNYIQGQQYTYSGEILKRSIDGKPLIYTVDVPSIDQSDVDDGFRWGKFEYATGITNRLS…
16920	GC_00003205		PV10SA01	1396	4	4	1	0	0.996219	1	0.998106	COG1436	Archaeal/vacuolar-type H+-ATPase subunit F/Vma7 (NtpF) (PDB:2D00)	COG1436	A/V-type ATP synthase	C	Energy production and conversion	MKKIFYSILLSGMMVLSACDALDLSPEDYYGSNDFWNQKSQVEMFMTGIHADLRDKYQMPVTLGEFRSEILISDVTSMGEGVYGPPMTNNLLTKDNTGIDDWYEVYPNIMHINLFIRNVDKEIDYLTGTEKSFYLGQAYGLRAYYYFYLYRTFGGVPLETEPKVTEGSIDITQLYKARSTPEETLEFIKEDINKSEAFFNESDKKMSNQYEWSYHATELLKAKIYMWSAKVTTGLPDDDIAGDHIATLTAVDPNNSDLLTAKKALLNLVNQQFELLPNFADLWTPEGKKNKEIIFALCFNKNELTNWGANWFYNVALFTNATDLDGNKYGPDPLKLLTAGPLRYEYKVPFIEIYDKEDTRLDATFFQYMFEGKTRGACWKKLMGHTDGGTHYYDSDVPV…
16921	GC_00003205		PV26FA01	649	4	4	1	0	0.996219	1	0.998106	COG1436	Archaeal/vacuolar-type H+-ATPase subunit F/Vma7 (NtpF) (PDB:2D00)	COG1436	A/V-type ATP synthase	C	Energy production and conversion	MKKIFYSILLSGMMVLSACDALDLSPEDYYGSNDFWNQKSQVEMFMTGIHADLRDKYQMPVTLGEFRSEILISDVTSMGEGVYGPPMTNNLLTKDNTGIDDWYEVYPNIMHINLFIRNVDKEIDYLTGTEKSFYLGQAYGLRAYYYFYLYRTFGGVPLETEPKVTEGSIDITQLYKARSTPEETLEFIKEDINKSEAFFNESDKKMSNQYEWSYHATELLKAKIYMWSAKVTTGLPDDDIAGDHIATLTAVDPNNSDLLTAKKALLNLVNQQFELLPNFADLWTPEGKKNKEIIFALCFNKNELTNWGANWFYNVALFTNATDLDGNKYGPDPLKLLTAGPLRYEYKVPFIEIYDKEDTRLDATFFQYMFEGKTRGACWKKLMGHTDGGTHYYDSDVPV…
16922	GC_00003205		PV2SA01	721	4	4	1	0	0.996219	1	0.998106	COG1436	Archaeal/vacuolar-type H+-ATPase subunit F/Vma7 (NtpF) (PDB:2D00)	COG1436	A/V-type ATP synthase	C	Energy production and conversion	MKKIFYSILLSGMMVLSACDALDLSPEDYYGSNDFWNQKSQVEMFMTGIHADLRDKYQMPVTLGEFRSEILISDVTSMGEGVYGPPMTNNLLTKDNTGVDDWYEVYPNIMHINLFIRNVDKEIDYMTGMEKSFYLGQAYGLRAYYYFYLYRTFGGVPLETEPKVTEGSIDITQLYKARSTPEETLEFIKEDINKSEAFFNESDKKMSDQYEWSYYATELLKAKIYMWSAKVTTGLPDDDIAGDHIATLTAVDPNNSDLLTAKKALLNLVNQQFELLPNFADLWTPEGKKNKEIIFALCFNKNELTNWGANWFYNVALFTNATDLDGNKYGPDPLKLLTAGPLRYEYKVPFIEIYDKEDTRLDATFFQYMFEGKTRGACWKKLMGHTDGGTHYYDSDVPV…
16923	GC_00003205		PV2SA02	1396	4	4	1	0	0.996219	1	0.998106	COG1436	Archaeal/vacuolar-type H+-ATPase subunit F/Vma7 (NtpF) (PDB:2D00)	COG1436	A/V-type ATP synthase	C	Energy production and conversion	MKKIFYSILLSGMMVLSACDALDLSPEDYYGSNDFWNQKSQVEMFMTGIHADLRDKYQMPVTLGEFRSEILISDVTSMGEGVYGPPMTNNLLTKDNTGVDDWYEVYPNIMHINLFIRNVDKEIDYMTGMEKSFYLGQAYGLRAYYYFYLYRTFGGVPLETEPKVTEGSIDITQLYKARSTPEETLEFIKEDINKSEAFFNESDKKMSDQYEWSYYATELLKAKIYMWSAKVTTGLPDDDIAGDHIATLTAVDPNNSDLLTAKKALLNLVNQQFELLPNFADLWTPEGKKNKEIIFALCFNKNELTNWGANWFYNVALFTNATDLDGNKYGPDPLKLLTAGPLRYEYKVPFIEIYDKEDTRLDATFFQYMFEGKTRGACWKKLMGHTDGGTHYYDSDVPV…
17357	GC_00003339		PV26FA01	801	3	3	1	0	1	1	1	COG1436	Archaeal/vacuolar-type H+-ATPase subunit F/Vma7 (NtpF) (PDB:2D00)	COG1436	A/V-type ATP synthase	C	Energy production and conversion	MKFNIKYITFSALLCASMVSCDLDVVPPSDISTETFWKNEKDAWNGLNALYAELPGMDIWDEMYTDNAHSHKPWEGPYELVQTNGITAGNDFGYGYSTVRIANNFIINVDKCDISEGLKERMKAEARFFRAWQYLQLTTKFGKAYLFTDVPEYNAPYAKRDPAEKVQAFILSELNEIAEILPDEYDGSYLYESSRITRAAALALRARAALYFGNYIEAEASAGKVISEGHHSLFRVTSLNAAQQQEADEMEKYIDFAEVGIDKDKFVKGLFSYETLWHKENANPGNPEYILTREYMADDNNCDWTRYTYIRPSQMGSGYSSFEPMQDLVDAYWSIDGKTLPEIPSEETRRARFADMWMKYFAEPVGETYKSVAPAVFREKVPTLDIKSIPYMQEFRNRD…
17358	GC_00003339		PV2SA01	522	3	3	1	0	1	1	1	COG1436	Archaeal/vacuolar-type H+-ATPase subunit F/Vma7 (NtpF) (PDB:2D00)	COG1436	A/V-type ATP synthase	C	Energy production and conversion	MKFNIKYITFSALLCASMVSCDLDVVPPSDISTETFWKNEKDAWNGLNALYAELPGMDIWDEMYTDNAHSHKPWEGPYELVQTNGITAGNDFGYGYSTVRIANNFIINVDKCDISEGLKERMKAEARFFRAWQYLQLTTKFGKAYLFTDVPEYNAPYAKRDPAEKVQAFILSELNEIAEILPDEYDGSYLYESSRITRAAALALRARAALYFGNYIEAEASAGKVISEGHHSLFRVTSLNAAQQQEADEMEKYIDFAEVGIDKDKFVKGLFSYETLWHKENANPGNPEYILTREYMADDNNCDWTRYTYIRPSQMGSGYSSFEPMQDLVDAYWSIDGKTLPEIPSEETRRARFADMWMKYFAEPVGETYKSVAPAVFREKVPTLDIKSIPYMQEFRNRD…
17359	GC_00003339		PV2SA02	1197	3	3	1	0	1	1	1	COG1436	Archaeal/vacuolar-type H+-ATPase subunit F/Vma7 (NtpF) (PDB:2D00)	COG1436	A/V-type ATP synthase	C	Energy production and conversion	MKFNIKYITFSALLCASMVSCDLDVVPPSDISTETFWKNEKDAWNGLNALYAELPGMDIWDEMYTDNAHSHKPWEGPYELVQTNGITAGNDFGYGYSTVRIANNFIINVDKCDISEGLKERMKAEARFFRAWQYLQLTTKFGKAYLFTDVPEYNAPYAKRDPAEKVQAFILSELNEIAEILPDEYDGSYLYESSRITRAAALALRARAALYFGNYIEAEASAGKVISEGHHSLFRVTSLNAAQQQEADEMEKYIDFAEVGIDKDKFVKGLFSYETLWHKENANPGNPEYILTREYMADDNNCDWTRYTYIRPSQMGSGYSSFEPMQDLVDAYWSIDGKTLPEIPSEETRRARFADMWMKYFAEPVGETYKSVAPAVFREKVPTLDIKSIPYMQEFRNRD…
17870	GC_00003510		PV10SA01	470	3	3	1	0	0.998691	1	0.999345	COG1436	Archaeal/vacuolar-type H+-ATPase subunit F/Vma7 (NtpF) (PDB:2D00)	COG1436	A/V-type ATP synthase	C	Energy production and conversion	MKLKNTLIIGLATLTLISCNDFLDVDSPSSYNEDFVFSQETEISRALNGVYASILVGDLYGSAYQKTFNLNSDVDMQMYTGNVATHNSYARFDCDDQGGEIDKYWRASYKAIEDANRFIRGVETGPLYNEENTAVMQMLGEAKCLRAMVYHDLVVMFGDIPFTFLPASQLGDNYVIPVMNREEIQNKLIEDLQDIAPKMSSTTTTTVERASKEFAWALIARIALTAGGYSLHPDKNNANSYGVMKRPEDYQKYYQIVKEYTSLVIASGTHSVGTSYQDIFTKESNFEIIAKGDPIFEIPFAKESTGNTGYSQGPTSTVNEGKTLGKNVWGESKGDIRLSAFYRYSFDENDKRRDFINGLWYYGNSANNATQDSCMIRADYTVHNNKWSKLWANAGQFTN…
17871	GC_00003510		PV26FA01	1877	3	3	1	0	0.998691	1	0.999345	COG1436	Archaeal/vacuolar-type H+-ATPase subunit F/Vma7 (NtpF) (PDB:2D00)	COG1436	A/V-type ATP synthase	C	Energy production and conversion	MKLKNTLIIGLATLTLISCNDFLDVDSPSSYNEDFVFSQETEISRALNGVYASILVGDLYGSAYQKTFNLNSDVDMQMYTGNVATHNSYARFDCDDQGGEIDKYWRASYKAIEDANRFIRGVETGPLYNEENTAVMQMLGEAKCLRAMVYHDLVVMFGDIPFTFLPASQLGDNYVIPVMNREEIQNKLIEDLQDIAPKMSSTTTTTVERASKEFAWALIARIALTAGGYSLHPDKNNANSYGVMKRPEDYQKYYQIVKEYTSLVIASGTHSVGTSYQDIFTKESNFEIIAKGDPIFEIPFAKESTGNTGYSQGPTSTVNEGKTLGKNVWGESKGDIRLSAFYRYSFDENDKRRDFINGLWYYGNSANNATQDSCMIRADYTVHNNKWSKLWANAGQFTN…
17872	GC_00003510		PV29FA01	3616	3	3	1	0	0.998691	1	0.999345	COG1436	Archaeal/vacuolar-type H+-ATPase subunit F/Vma7 (NtpF) (PDB:2D00)	COG1436	A/V-type ATP synthase	C	Energy production and conversion	MKFKNTLIIGLATLTLISCNDFLDVDSPSSYNEDFVFSQETEISRALNGVYASILVGDLYGSAYQKTFNLNSDVDMQMYTGNVATHNSYARFDCDDQGGEIDKYWRASYKAIEDANRFIRGVETGPLYNEENTAVMQMLGEAKCLRAMVYHDLVVMFGDVPFTFLPASQLGDNYVIPVMNREEIQNKLIEDLQDIAPKMSSTTTTTVERASKEFAWALIARIALTAGGYSLHPDKNNANSYGVMKRPEDYQKYYQIVKEYTSLVIASGTHSVGTSYQDIFTKESNFEIIAKGDPIFEIPFAKESTGNTGYSQGPTSTVNEGKTLGKNVWGESKGDIRLSAFYRYSFDENDKRRDFINGLWYYGNSANNATQDSCMIRADYTVHNNKWSKLWANAGQFTN…
3254	GC_00000410		PV10SA01	1904	5	5	1	1	1	1	1	COG1394	Archaeal/vacuolar-type H+-ATPase subunit D/Vma8 (NtpD) (PDB:3AON)	COG1394	A/V-type ATP synthase	C	Energy production and conversion	MAIKFQYNKTSLQQLEKQLKVRVRTLPIIKNKESALRMEVKRCKTEAAGLEERLEKQIQAYEAMFALWNEFDASLIKVSDVHLGIKKIAGVRVPLLENVDFDIRPYSLFNSPKWYSDGIYLLKGLAQTAIEREFMLAKLNLLEHARKKTTQKVNLFEKVQIPGYQDALRKIKRFMEDEENLSKSSQKILKSIQEKRKEAEA
3255	GC_00000410		PV26FA01	4151	5	5	1	1	1	1	1	COG1394	Archaeal/vacuolar-type H+-ATPase subunit D/Vma8 (NtpD) (PDB:3AON)	COG1394	A/V-type ATP synthase	C	Energy production and conversion	MAIKFQYNKTSLQQLEKQLKVRVRTLPIIKNKESALRMEVKRCKTEAAGLEERLEKQIQAYEAMFALWNEFDASLIKVSDVHLGIKKIAGVRVPLLENVDFDIRPYSLFNSPKWYSDGIYLLKGLAQTAIEREFMLAKLNLLEHARKKTTQKVNLFEKVQIPGYQDALRKIKRFMEDEENLSKSSQKILKSIQEKRKEAEA
3256	GC_00000410		PV29FA01	1462	5	5	1	1	1	1	1	COG1394	Archaeal/vacuolar-type H+-ATPase subunit D/Vma8 (NtpD) (PDB:3AON)	COG1394	A/V-type ATP synthase	C	Energy production and conversion	MAIKFQYNKTSLQQLEKQLKVRVRTLPIIKNKESALRMEVKRCKTEAAGLEERLEKQIQAYEAMFALWNEFDASLIKVSDVHLGIKKIAGVRVPLLENVDFDIRPYSLFNSPKWYSDGIYLLKGLAQTAIEREFMLAKLNLLEHARKKTTQKVNLFEKVQIPGYQDALRKIKRFMEDEENLSKSSQKILKSIQEKRKEAEA
3257	GC_00000410		PV2SA01	1826	5	5	1	1	1	1	1	COG1394	Archaeal/vacuolar-type H+-ATPase subunit D/Vma8 (NtpD) (PDB:3AON)	COG1394	A/V-type ATP synthase	C	Energy production and conversion	MAIKFQYNKTSLQQLEKQLKVRVRTLPIIKNKESALRMEVKRCKTEAAGLEERLEKQIQAYEAMFALWNEFDASLIKVSDVHLGIKKIAGVRVPLLENVDFDIRPYSLFNSPKWYSDGIYLLKGLAQTAIEREFMLAKLNLLEHARKKTTQKVNLFEKVQIPGYQDALRKIKRFMEDEENLSKSSQKILKSIQEKRKEAEA
3258	GC_00000410		PV2SA02	2501	5	5	1	1	1	1	1	COG1394	Archaeal/vacuolar-type H+-ATPase subunit D/Vma8 (NtpD) (PDB:3AON)	COG1394	A/V-type ATP synthase	C	Energy production and conversion	MAIKFQYNKTSLQQLEKQLKVRVRTLPIIKNKESALRMEVKRCKTEAAGLEERLEKQIQAYEAMFALWNEFDASLIKVSDVHLGIKKIAGVRVPLLENVDFDIRPYSLFNSPKWYSDGIYLLKGLAQTAIEREFMLAKLNLLEHARKKTTQKVNLFEKVQIPGYQDALRKIKRFMEDEENLSKSSQKILKSIQEKRKEAEA
10214	GC_00001804		PV10SA01	1900	5	5	1	1	0.996939	1	0.998467	COG1390	Archaeal/vacuolar-type H+-ATPase subunit E/Vma4 (NtpE) (PDB:2DM9)	COG1390	A/V-type ATP synthase	C	Energy production and conversion	MENKIQELTDKIYREGVEKGNEEAQRLISSARDEAAKIVEDARKEAESILAVARKSAKETAENTQSEIKLFAGQAVNALKTEIATLLTNEVVSESVKGFVADKEYLNKFIVSLAAQWSANESIVISTADAEGLKKYFAANAKALLDKGVRIEEVNGTKSLFTISPADGSYKVNFGEEEFENYFKDFLRPQLVEMLF
10215	GC_00001804		PV26FA01	4155	5	5	1	1	0.996939	1	0.998467	COG1390	Archaeal/vacuolar-type H+-ATPase subunit E/Vma4 (NtpE) (PDB:2DM9)	COG1390	A/V-type ATP synthase	C	Energy production and conversion	MENKIQELTDKIYREGVEKGNEEAQRLISSARNEAAKIVEDARKEAESILAVARKSAKETAENTQSEIKLFAGQAVNALKTEIATLLTNEVVSESVKGFVADKEYLNKFIVSLAAQWSANESIVISTADAEGLKKYFAANAKALLDKGVRIEEVNGTKSLFTISPADGSYKVNFGEEEFENYFKDFLRPQLVEMLF
10216	GC_00001804		PV29FA01	1466	5	5	1	1	0.996939	1	0.998467	COG1390	Archaeal/vacuolar-type H+-ATPase subunit E/Vma4 (NtpE) (PDB:2DM9)	COG1390	A/V-type ATP synthase	C	Energy production and conversion	MENKIQELTDKIYREGVEKGNEEAQRLISSARDEAAKIVEDARKEAESILAVARKSAKETAENTQSEIKLFAGQAVNALKTEIATLLTNEVVSESVKGFVADKEYLNKFIVSLAAQWSANESIVISTADAEGLKKYFAANAKALLDKGVRIEEVNGTKSLFTISPADGSYKVNFGEEEFENYFKDFLRPQLVEMLF
10217	GC_00001804		PV2SA01	1830	5	5	1	1	0.996939	1	0.998467	COG1390	Archaeal/vacuolar-type H+-ATPase subunit E/Vma4 (NtpE) (PDB:2DM9)	COG1390	A/V-type ATP synthase	C	Energy production and conversion	MENKIQELTDKIYREGVEKGNEEAQRLISSARNEAAKIVEDARKEAESILAVARKSAKETAENTQSEIKLFAGQAVNALKTEIATLLTNEVVSESVKGFVADKEYLNKFIVSLAAQWSANESIVISTADAEGLKKYFAANAKALLDKGVRIEEVNGTKSLFTISPADGSYKVNFGEEEFENYFKDFLRPQLVEMLF
10218	GC_00001804		PV2SA02	2505	5	5	1	1	0.996939	1	0.998467	COG1390	Archaeal/vacuolar-type H+-ATPase subunit E/Vma4 (NtpE) (PDB:2DM9)	COG1390	A/V-type ATP synthase	C	Energy production and conversion	MENKIQELTDKIYREGVEKGNEEAQRLISSARNEAAKIVEDARKEAESILAVARKSAKETAENTQSEIKLFAGQAVNALKTEIATLLTNEVVSESVKGFVADKEYLNKFIVSLAAQWSANESIVISTADAEGLKKYFAANAKALLDKGVRIEEVNGTKSLFTISPADGSYKVNFGEEEFENYFKDFLRPQLVEMLF
3754	GC_00000510		PV10SA01	2172	5	5	1	1	1	1	1	COG1347	Na+-transporting NADH:ubiquinone oxidoreductase, subunit NqrD (NqrD) (PDB:4P6V)	COG1347	Na+-translocating NADH dehydrogenase	C	Energy production and conversion	MSALFSKKNREVLLTPLGLNNPVTVQVLGICSALAVTAQLEPAIVMGLSVTIITAFSNFVISLLRNTIPNRIRIIVQLVVVAALVTIVSEILKAFAYDVSVQLSVYVGLIITNCILMGRLEAFAMMNGPWESFLDGIGNGLGYAKILIIVAFFRELLGAGTLFGFQVIPQAVYDLGYLNNGLMLMPPMALIICACIIWYQRAKHKELQESNN
3755	GC_00000510		PV26FA01	3818	5	5	1	1	1	1	1	COG1347	Na+-transporting NADH:ubiquinone oxidoreductase, subunit NqrD (NqrD) (PDB:4P6V)	COG1347	Na+-translocating NADH dehydrogenase	C	Energy production and conversion	MSALFSKKNREVLLTPLGLNNPVTVQVLGICSALAVTAQLEPAIVMGLSVTIITAFSNFVISLLRNTIPNRIRIIVQLVVVAALVTIVSEILKAFAYDVSVQLSVYVGLIITNCILMGRLEAFAMMNGPWESFLDGIGNGLGYAKILIIVAFFRELLGAGTLFGFQVIPQAVYDLGYLNNGLMLMPPMALIICACIIWYQRAKHKELQESNN
3756	GC_00000510		PV29FA01	1220	5	5	1	1	1	1	1	COG1347	Na+-transporting NADH:ubiquinone oxidoreductase, subunit NqrD (NqrD) (PDB:4P6V)	COG1347	Na+-translocating NADH dehydrogenase	C	Energy production and conversion	MSALFSKKNREVLLTPLGLNNPVTVQVLGICSALAVTAQLEPAIVMGLSVTIITAFSNFVISLLRNTIPNRIRIIVQLVVVAALVTIVSEILKAFAYDVSVQLSVYVGLIITNCILMGRLEAFAMMNGPWESFLDGIGNGLGYAKILIIVAFFRELLGAGTLFGFQVIPQAVYDLGYLNNGLMLMPPMALIICACIIWYQRAKHKELQESNN
3757	GC_00000510		PV2SA01	1666	5	5	1	1	1	1	1	COG1347	Na+-transporting NADH:ubiquinone oxidoreductase, subunit NqrD (NqrD) (PDB:4P6V)	COG1347	Na+-translocating NADH dehydrogenase	C	Energy production and conversion	MSALFSKKNREVLLTPLGLNNPVTVQVLGICSALAVTAQLEPAIVMGLSVTIITAFSNFVISLLRNTIPNRIRIIVQLVVVAALVTIVSEILKAFAYDVSVQLSVYVGLIITNCILMGRLEAFAMMNGPWESFLDGIGNGLGYAKILIIVAFFRELLGAGTLFGFQVIPQAVYDLGYLNNGLMLMPPMALIICACIIWYQRAKHKELQESNN
3758	GC_00000510		PV2SA02	2341	5	5	1	1	1	1	1	COG1347	Na+-transporting NADH:ubiquinone oxidoreductase, subunit NqrD (NqrD) (PDB:4P6V)	COG1347	Na+-translocating NADH dehydrogenase	C	Energy production and conversion	MSALFSKKNREVLLTPLGLNNPVTVQVLGICSALAVTAQLEPAIVMGLSVTIITAFSNFVISLLRNTIPNRIRIIVQLVVVAALVTIVSEILKAFAYDVSVQLSVYVGLIITNCILMGRLEAFAMMNGPWESFLDGIGNGLGYAKILIIVAFFRELLGAGTLFGFQVIPQAVYDLGYLNNGLMLMPPMALIICACIIWYQRAKHKELQESNN
12054	GC_00002172		PV10SA01	1905	5	5	1	1	0.998669	1	0.999334	COG1269	Archaeal/vacuolar-type H+-ATPase subunit I/STV1 (NtpI) (PDB:2JTW)	COG1269	A/V-type ATP synthase	C	Energy production and conversion	MITKMKKLTFLIYHKDYECFLQNIRDLGVVHVAEKAQGTAENTELQESIRLSDHYASTIKFLQGFNVELQEQKGDTARGEKALEEVEALQLEKTQLQHQLQICDKERAALEVWGDFDPASVMRLQEVGYQVNFYICSEKNFNEEWLDTYYATEVNRIGSRIYFITITKEGTLPELEVESVKLPVMALSRLAARCEDLEQQMKSVDDKLAAIAGEKLLSLQVAQANIRSQIEFSKVVLSTEQAADDKLMLLQGWAPATQIPEITNFLNQQEAYFEIADPTPEDNVPIQLNNKGFFRLFEPIMKLYMLPKYNELDLTPFFAPFFMLFFGLCLGDSGYGLFMVLGVTVYRMLAKNVGASMKPILTLVQILGASTFFCGMLTGTFFGFNLYGNDIPFFNKMRD…
12055	GC_00002172		PV26FA01	4150	5	5	1	1	0.998669	1	0.999334	COG1269	Archaeal/vacuolar-type H+-ATPase subunit I/STV1 (NtpI) (PDB:2JTW)	COG1269	A/V-type ATP synthase	C	Energy production and conversion	MITKMKKLTFLIYHKDYECFLQNIRDLGVVHVAEKAQGTAENTELQESIRLSDHYASTIKFLQGFNVELQEQKGDTARGEKALEEVEALQLEKTQLQHQLQICDKERAALEVWGDFDPASVMRLQEVGYQVNFYICSEKNFNEEWLDTYYATEVNRIGSRIYFITITKEGTLPELEVESVKLPVMALSRLAARCEDLEQQMKSVDDKLAAIAGEKLLSLQVAQANIRSQIEFSKVVLSTEQAADDKLMLLQGWAPATQIPEITNFLNQQEAYFEIADPTPEDNVPIQLNNKGFFRLFEPIMKLYMLPKYNELDLTPFFAPFFMLFFGLCLGDSGYGLFMVLGVTVYRMLAKNVGASMKPILTLVQILGASTFFCGMLTGTFFGFNLYGNDIPFFNKMRD…
12056	GC_00002172		PV29FA01	1461	5	5	1	1	0.998669	1	0.999334	COG1269	Archaeal/vacuolar-type H+-ATPase subunit I/STV1 (NtpI) (PDB:2JTW)	COG1269	A/V-type ATP synthase	C	Energy production and conversion	MITKMKKLTFLIYHKDYECFLQNIRDLGVVHVAEKAQGTAENTELQESIRLSDHYASTIKFLQGFNVELQEQKGDTARGEKALEEVEALQLEKTQLQHQLQICDKERAALEVWGDFDPASVMRLQEVGYQVNFYICSEKNFNEEWLDTYYATEVNRIGSRIYFITITKEGTLPELEVESVKLPVMSLSRLAARCEDLEQQMKSVDDKLAAIAGEKLLSLQVAQANIRSQIEFSKVVLSTEQAADDKLMLLQGWAPATQIPEITNFLNQQEAYFEIADPTPEDNVPIQLNNKGFFRLFEPIMKLYMLPKYNELDLTPFFAPFFMLFFGLCLGDSGYGLFMVLGVTVYRMLAKNVGASMKPILTLVQILGASTFFCGMLTGTFFGFNLYGNDIPFFNKMRD…
12057	GC_00002172		PV2SA01	1825	5	5	1	1	0.998669	1	0.999334	COG1269	Archaeal/vacuolar-type H+-ATPase subunit I/STV1 (NtpI) (PDB:2JTW)	COG1269	A/V-type ATP synthase	C	Energy production and conversion	MITKMKKLTFLIYHKDYECFLQNIRDLGVVHVAEKAQGTAENTELQESIRLSDHYASTIKFLQGFNVELQEQKGDTARGEKALEEVEALQLEKTQLQHQLQICDKERAALEVWGDFDPASVMRLQEVGYQVNFYICSEKNFNEEWLDTYYATEVNRIGSRIYFITITKEGTLPELEVESVKLPVMSLSRLAARCEDLEQQMKSVDDKLAAIAGEKLLSLQVAQANIRSQIEFSKVVLSTEQAADDKLMLLQGWAPATQIPEITNFLNQQEAYFEIADPTPEDNVPIQLNNKGFFRLFEPIMKLYMLPKYNELDLTPFFAPFFMLFFGLCLGDSGYGLFMVLGVTVYRMLAKNVGASMKPILTLVQILGASTFFCGMLTGTFFGFNLYGNDIPFFNKMRD…
12058	GC_00002172		PV2SA02	2500	5	5	1	1	0.998669	1	0.999334	COG1269	Archaeal/vacuolar-type H+-ATPase subunit I/STV1 (NtpI) (PDB:2JTW)	COG1269	A/V-type ATP synthase	C	Energy production and conversion	MITKMKKLTFLIYHKDYECFLQNIRDLGVVHVAEKAQGTAENTELQESIRLSDHYASTIKFLQGFNVELQEQKGDTARGEKALEEVEALQLEKTQLQHQLQICDKERAALEVWGDFDPASVMRLQEVGYQVNFYICSEKNFNEEWLDTYYATEVNRIGSRIYFITITKEGTLPELEVESVKLPVMSLSRLAARCEDLEQQMKSVDDKLAAIAGEKLLSLQVAQANIRSQIEFSKVVLSTEQAADDKLMLLQGWAPATQIPEITNFLNQQEAYFEIADPTPEDNVPIQLNNKGFFRLFEPIMKLYMLPKYNELDLTPFFAPFFMLFFGLCLGDSGYGLFMVLGVTVYRMLAKNVGASMKPILTLVQILGASTFFCGMLTGTFFGFNLYGNDIPFFNKMRD…
11239	GC_00002009		PV10SA01	459	5	5	1	1	0.993572	1	0.996776	COG1249	Dihydrolipoamide dehydrogenase (E3) component of pyruvate/2-oxoglutarate dehydrogenase complex or glutathione oxidoreductase (Lpd) (PDB:6QKG)	COG1249	Glycine cleavagePyruvate oxidation	C	Energy production and conversion	MKYQIAIIGGGPAGYTAAEAAGKAGLSVVLFEKRSLGGVCLNEGCIPTKTLLYSAKVYDYAKHASKYAVNVPEASFDLGKIVARKSKVVRKLVLGIKAKLTAHQVHIVTGEATIVDKNTIQCGGETYECENLLLCTGSETFIPPIPGVENVDYWTHRDALDNKEVPASLTIVGGGVIGMEFASFFTSLGVQVTVVEMLDEILGGMDKELSAMLRAEYAKKGIKFLLSTKVVGVSKGETGITVSYENADGTGTVTADKLLMSVGRRPVTKGFGLENLNLEWTERRCIKVDEHLQSSVPGVYVCGDLNGVSLLAHTAVREAEVAVHHITGKEDVMSYRAIPGVVYTNPEIAGVGMSEEALQAAGIPYRAVKLPMAYSGRFVAENEGVNGVCKVLTAEDGTV…
11240	GC_00002009		PV26FA01	1867	5	5	1	1	0.993572	1	0.996776	COG1249	Dihydrolipoamide dehydrogenase (E3) component of pyruvate/2-oxoglutarate dehydrogenase complex or glutathione oxidoreductase (Lpd) (PDB:6QKG)	COG1249	Glycine cleavagePyruvate oxidation	C	Energy production and conversion	MKYQIAIIGGGPAGYTAAEAAGKAGLSVVLFEKRSLGGVCLNEGCIPTKTLLYSAKVYDYAKHASKYAVNVSEASFDLGKIVARKSKVVRKLVLGIKAKLTAHQVNIVTGEATIVDKNTIQCGGETYECENLLLCTGSETFIPPIPGVENVDYWTHRDALDNKEVPASLTIVGGGVIGMEFASFFTSLGVQVTVVEMLDEILGGMDKELSAMLRAEYAKKGIKFLLSTKVVGVSKGETGITVSYENADGAGTVTADKLLMSVGRRPVTKGFGLENLNLEWTERRCIKVDEHLQSSVPGVYVCGDLNGVSLLAHTAVREAEVAVHHITGKEDAMSYRAIPGVVYTNPEIAGVGMSEEALQAAGIPYRAVKLPMAYSGRFVAENEGVNGVCKVLAAEDGTV…
11241	GC_00002009		PV29FA01	3626	5	5	1	1	0.993572	1	0.996776	COG1249	Dihydrolipoamide dehydrogenase (E3) component of pyruvate/2-oxoglutarate dehydrogenase complex or glutathione oxidoreductase (Lpd) (PDB:6QKG)	COG1249	Glycine cleavagePyruvate oxidation	C	Energy production and conversion	MKYQIAIIGGGPAGYTAAEAAGKAGLSVVLFEKRSLGGVCLNEGCIPTKTLLYSAKVYDYAKHASKYAVNVPEASFDLGKIVARKSKVVRKLVLGIKAKLTAHQVHIVTGEATIVDKNTIQCGGETYECENLLLCTGSETFIPPIPGVENVDYWTHRDALDNKEVPASLTIVGGGVIGMEFASFFTSLGVQVTVVEMLDEILGGMDKELSAMLRAEYAKKGIKFLLSTKVVGVSKGETGITVSYENADGAGTVTADKLLMSVGRRPVTKGFGLENLNLEWTERRCIKVDEHLQSSVPGVYVCGDLNGVSLLAHTAVREAEVAVHHIIGKEDAMSYRAIPGVVYTNPEIAGVGMSEEALQAAGIPYRAVKLPMAYSGRFVAENEGVNGVCKILTAEDGTV…
11242	GC_00002009		PV2SA01	3975	5	5	1	1	0.993572	1	0.996776	COG1249	Dihydrolipoamide dehydrogenase (E3) component of pyruvate/2-oxoglutarate dehydrogenase complex or glutathione oxidoreductase (Lpd) (PDB:6QKG)	COG1249	Glycine cleavagePyruvate oxidation	C	Energy production and conversion	MKYQIAIIGGGPAGYTAAEAAGKAGLSVVLFEKRSLGGVCLNEGCIPTKTLLYSAKVYDYAKHASKYAVNVSEASFDLGKIVARKSKVVRKLVLGIKAKLTAHQVNIVTGEATIVDKNTIQCGGETYECENLLLCTGSETFIPPIPGVENVDYWTHRDALDNKEVPASLTIVGGGVIGMEFASFFTSLGVQVTVVEMLDEILGGMDKELSAMLRAEYAKKGIKFLLSTKVVGVSKGETGITVSYENADGAGTVTADKLLMSVGRRPVTKGFGLENLNLEWTERRCIKVDEHLQSSVPGVYVCGDLNGVSLLAHTAVREAEVAVHHITGKEDAMSYRAIPGVVYTNPEIAGVGMSEEALQAAGIPYRAVKLPMAYSGRFVAENEGVNGVCKVLAAEDGTV…
11243	GC_00002009		PV2SA02	193	5	5	1	1	0.993572	1	0.996776	COG1249	Dihydrolipoamide dehydrogenase (E3) component of pyruvate/2-oxoglutarate dehydrogenase complex or glutathione oxidoreductase (Lpd) (PDB:6QKG)	COG1249	Glycine cleavagePyruvate oxidation	C	Energy production and conversion	MKYQIAIIGGGPAGYTAAEAAGKAGLSVVLFEKRSLGGVCLNEGCIPTKTLLYSAKVYDYAKHASKYAVNVSEASFDLGKIVARKSKVVRKLVLGIKAKLTAHQVNIVTGEATIVDKNTIQCGGETYECENLLLCTGSETFIPPIPGVENVDYWTHRDALDNKEVPASLTIVGGGVIGMEFASFFTSLGVQVTVVEMLDEILGGMDKELSAMLRAEYAKKGIKFLLSTKVVGVSKGETGITVSYENADGAGTVTADKLLMSVGRRPVTKGFGLENLNLEWTERRCIKVDEHLQSSVPGVYVCGDLNGVSLLAHTAVREAEVAVHHITGKEDAMSYRAIPGVVYTNPEIAGVGMSEEALQAAGIPYRAVKLPMAYSGRFVAENEGVNGVCKVLAAEDGTV…
5424	GC_00000844		PV10SA01	1903	5	5	1	1	1	1	1	COG1156	Archaeal/vacuolar-type H+-ATPase subunit B/Vma2 (NtpB) (PDB:3GQB)	COG1156	A/V-type ATP synthase	C	Energy production and conversion	MATKAFQKIYTKISQITKATCSLKASGVGYDELAMVNGKLAQVVKIMGDEVTLQVFEGTEGIPTNAEVVFLGKSPTLKVSDQLAGRFFNAFGDPIDGGPEIEGQEVPIGGPSVNPVRRKQPSELIATGIAGIDLNNTLVSGQKIPFFADPDQPFNQVMANVALRAETDKIILGGMGMTNDDYLYFKNVFSNAGALDRIISFVNTTENPPVERLLIPDMALTAAEYFAVEHNQKVLVLLTDMTSYADALAIVSNRMDQIPSKDSMPGSLYSDLAKIYEKAVQFPAGGSITIIAVTTLSGGDITHAVPDNTGYITEGQLFLRRDSDIGKVIVDPFRSLSRLKQLVSGKKTRKDHPQVMNAAVRLYADAANAKTKMENGFDLTNYDERTLAFAKDYANQLLA…
5425	GC_00000844		PV26FA01	4152	5	5	1	1	1	1	1	COG1156	Archaeal/vacuolar-type H+-ATPase subunit B/Vma2 (NtpB) (PDB:3GQB)	COG1156	A/V-type ATP synthase	C	Energy production and conversion	MATKAFQKIYTKISQITKATCSLKASGVGYDELAMVNGKLAQVVKIMGDEVTLQVFEGTEGIPTNAEVVFLGKSPTLKVSDQLAGRFFNAFGDPIDGGPEIEGQEVPIGGPSVNPVRRKQPSELIATGIAGIDLNNTLVSGQKIPFFADPDQPFNQVMANVALRAETDKIILGGMGMTNDDYLYFKNVFSNAGALDRIISFVNTTENPPVERLLIPDMALTAAEYFAVEHNQKVLVLLTDMTSYADALAIVSNRMDQIPSKDSMPGSLYSDLAKIYEKAVQFPAGGSITIIAVTTLSGGDITHAVPDNTGYITEGQLFLRRDSDIGKVIVDPFRSLSRLKQLVSGKKTRKDHPQVMNAAVRLYADAANAKTKMENGFDLTNYDERTLAFAKDYANQLLA…
5426	GC_00000844		PV29FA01	1463	5	5	1	1	1	1	1	COG1156	Archaeal/vacuolar-type H+-ATPase subunit B/Vma2 (NtpB) (PDB:3GQB)	COG1156	A/V-type ATP synthase	C	Energy production and conversion	MATKAFQKIYTKISQITKATCSLKASGVGYDELAMVNGKLAQVVKIMGDEVTLQVFEGTEGIPTNAEVVFLGKSPTLKVSDQLAGRFFNAFGDPIDGGPEIEGQEVPIGGPSVNPVRRKQPSELIATGIAGIDLNNTLVSGQKIPFFADPDQPFNQVMANVALRAETDKIILGGMGMTNDDYLYFKNVFSNAGALDRIISFVNTTENPPVERLLIPDMALTAAEYFAVEHNQKVLVLLTDMTSYADALAIVSNRMDQIPSKDSMPGSLYSDLAKIYEKAVQFPAGGSITIIAVTTLSGGDITHAVPDNTGYITEGQLFLRRDSDIGKVIVDPFRSLSRLKQLVSGKKTRKDHPQVMNAAVRLYADAANAKTKMENGFDLTNYDERTLAFAKDYANQLLA…
5427	GC_00000844		PV2SA01	1827	5	5	1	1	1	1	1	COG1156	Archaeal/vacuolar-type H+-ATPase subunit B/Vma2 (NtpB) (PDB:3GQB)	COG1156	A/V-type ATP synthase	C	Energy production and conversion	MATKAFQKIYTKISQITKATCSLKASGVGYDELAMVNGKLAQVVKIMGDEVTLQVFEGTEGIPTNAEVVFLGKSPTLKVSDQLAGRFFNAFGDPIDGGPEIEGQEVPIGGPSVNPVRRKQPSELIATGIAGIDLNNTLVSGQKIPFFADPDQPFNQVMANVALRAETDKIILGGMGMTNDDYLYFKNVFSNAGALDRIISFVNTTENPPVERLLIPDMALTAAEYFAVEHNQKVLVLLTDMTSYADALAIVSNRMDQIPSKDSMPGSLYSDLAKIYEKAVQFPAGGSITIIAVTTLSGGDITHAVPDNTGYITEGQLFLRRDSDIGKVIVDPFRSLSRLKQLVSGKKTRKDHPQVMNAAVRLYADAANAKTKMENGFDLTNYDERTLAFAKDYANQLLA…
5428	GC_00000844		PV2SA02	2502	5	5	1	1	1	1	1	COG1156	Archaeal/vacuolar-type H+-ATPase subunit B/Vma2 (NtpB) (PDB:3GQB)	COG1156	A/V-type ATP synthase	C	Energy production and conversion	MATKAFQKIYTKISQITKATCSLKASGVGYDELAMVNGKLAQVVKIMGDEVTLQVFEGTEGIPTNAEVVFLGKSPTLKVSDQLAGRFFNAFGDPIDGGPEIEGQEVPIGGPSVNPVRRKQPSELIATGIAGIDLNNTLVSGQKIPFFADPDQPFNQVMANVALRAETDKIILGGMGMTNDDYLYFKNVFSNAGALDRIISFVNTTENPPVERLLIPDMALTAAEYFAVEHNQKVLVLLTDMTSYADALAIVSNRMDQIPSKDSMPGSLYSDLAKIYEKAVQFPAGGSITIIAVTTLSGGDITHAVPDNTGYITEGQLFLRRDSDIGKVIVDPFRSLSRLKQLVSGKKTRKDHPQVMNAAVRLYADAANAKTKMENGFDLTNYDERTLAFAKDYANQLLA…
12154	GC_00002192		PV10SA01	1902	5	5	1	1	0.999658	1	0.999829	COG1155	Archaeal/vacuolar-type H+-ATPase catalytic subunit A/Vma1 (NtpA) (PDB:3J9T)	COG1155	A/V-type ATP synthase	C	Energy production and conversion	MATKGTVSGVIANMVTLTVDGPVAQNEICYILTGGDRLMAEVIKVVGSNVYVQVFESTRGLKVGAEAEFTGHMLEVTLGPGMLSKNYDGLQNDLDKMDGVFLKRGQYTYPLDKERVWHFVPLVKMGDEVGPSAWLGQVDENFQPLKIMVPFQLTGTYKVKSIVPEGDYTIEDTVVVLTDREGKDIPVNMIQKWPVKKAMTNYKEKPRPYKLLETGVRVIDTVNPIVEGGTGFIPGPFGTGKTVLQHAISKQAEADIVIIAACGERANEVVEIFTEFPELVDPHTGRKLMERTIIIANTSNMPVAAREASVYTAMTISEYYRAMGLKVLLMADSTSRWAQALREMSNRMEELPGPDAFPMDISAIISNFYGRAGYVHLNNGETGSITFIGTVSPAGGNLK…
12155	GC_00002192		PV26FA01	4153	5	5	1	1	0.999658	1	0.999829	COG1155	Archaeal/vacuolar-type H+-ATPase catalytic subunit A/Vma1 (NtpA) (PDB:3J9T)	COG1155	A/V-type ATP synthase	C	Energy production and conversion	MATKGTVSGVIANMVTLTVDGPVAQNEICYILTGGDRLMAEVIKVVGSNVYVQVFESTRGLKVGAEAEFTGHMLEVTLGPGMLSKNYDGLQNDLDKMDGVFLKRGQYTYPLDKERVWHFVPLVKMGDEVGPSAWLGQVDENFQPLKIMVPFQLTGTYKVKSIVPEGDYTIEDTVVVLTDREGKDIPVNMIQKWPVKKAMTNYKEKPRPYKLLETGVRVIDTVNPIVEGGTGFIPGPFGTGKTVLQHAISKQAEADIVIIAACGERANEVVEIFTEFPELVDPHTGRKLMERTIIIANTSNMPVAAREASVYTAMTISEYYRAMGLKVLLMADSTSRWAQALREMSNRMEELPGPDAFPMDISAIISNFYGRAGYVHLNNGETGSITFIGTVSPAGGNLK…
12156	GC_00002192		PV29FA01	1464	5	5	1	1	0.999658	1	0.999829	COG1155	Archaeal/vacuolar-type H+-ATPase catalytic subunit A/Vma1 (NtpA) (PDB:3J9T)	COG1155	A/V-type ATP synthase	C	Energy production and conversion	MATKGTVSGVIANMVTLTVDGPVAQNEICYILTGGDRLMAEVIKVVGSNVYVQVFESTRGLKVGAEAEFTGHMLEVTLGPGMLSKNYDGLQNDLDKMDGVFLKRGQYTYPLDKERVWHFVPLVKVGDEVGPSAWLGQVDENFQPLKIMVPFQLTGTYKVKSIVPEGDYTIEDTVVVLTDREGKDIPVNMIQKWPVKKAMTNYKEKPRPYKLLETGVRVIDTVNPIVEGGTGFIPGPFGTGKTVLQHAISKQAEADIVIIAACGERANEVVEIFTEFPELVDPHTGRKLMERTIIIANTSNMPVAAREASVYTAMTISEYYRAMGLKVLLMADSTSRWAQALREMSNRMEELPGPDAFPMDISAIISNFYGRAGYVHLNNGETGSITFIGTVSPAGGNLK…
12157	GC_00002192		PV2SA01	1828	5	5	1	1	0.999658	1	0.999829	COG1155	Archaeal/vacuolar-type H+-ATPase catalytic subunit A/Vma1 (NtpA) (PDB:3J9T)	COG1155	A/V-type ATP synthase	C	Energy production and conversion	MATKGTVSGVIANMVTLTVDGPVAQNEICYILTGGDRLMAEVIKVVGSNVYVQVFESTRGLKVGAEAEFTGHMLEVTLGPGMLSKNYDGLQNDLDKMDGVFLKRGQYTYPLDKERVWHFVPLVKVGDEVGPSAWLGQVDENFQPLKIMVPFQLTGTYKVKSIVPEGDYTIEDTVVVLTDREGKDIPVNMIQKWPVKKAMTNYKEKPRPYKLLETGVRVIDTVNPIVEGGTGFIPGPFGTGKTVLQHAISKQAEADIVIIAACGERANEVVEIFTEFPELVDPHTGRKLMERTIIIANTSNMPVAAREASVYTAMTISEYYRAMGLKVLLMADSTSRWAQALREMSNRMEELPGPDAFPMDISAIISNFYGRAGYVHLNNGETGSITFIGTVSPAGGNLK…
12158	GC_00002192		PV2SA02	2503	5	5	1	1	0.999658	1	0.999829	COG1155	Archaeal/vacuolar-type H+-ATPase catalytic subunit A/Vma1 (NtpA) (PDB:3J9T)	COG1155	A/V-type ATP synthase	C	Energy production and conversion	MATKGTVSGVIANMVTLTVDGPVAQNEICYILTGGDRLMAEVIKVVGSNVYVQVFESTRGLKVGAEAEFTGHMLEVTLGPGMLSKNYDGLQNDLDKMDGVFLKRGQYTYPLDKERVWHFVPLVKVGDEVGPSAWLGQVDENFQPLKIMVPFQLTGTYKVKSIVPEGDYTIEDTVVVLTDREGKDIPVNMIQKWPVKKAMTNYKEKPRPYKLLETGVRVIDTVNPIVEGGTGFIPGPFGTGKTVLQHAISKQAEADIVIIAACGERANEVVEIFTEFPELVDPHTGRKLMERTIIIANTSNMPVAAREASVYTAMTISEYYRAMGLKVLLMADSTSRWAQALREMSNRMEELPGPDAFPMDISAIISNFYGRAGYVHLNNGETGSITFIGTVSPAGGNLK…
4824	GC_00000724		PV10SA01	3291	5	5	1	1	1	1	1	COG1143	Formate hydrogenlyase subunit 6/NADH:ubiquinone oxidoreductase 23 kD subunit (chain I) (NuoI) (PDB:1B0P)	COG1143	NADH dehydrogenase	C	Energy production and conversion	MAKIKGAIVVDTERCKGCNLCVVACPLHVIALNAKQVNKKGYTFAHQVLEDTCNGCASCATVCPDGCITVYKVKQQ
4825	GC_00000724		PV26FA01	2924	5	5	1	1	1	1	1	COG1143	Formate hydrogenlyase subunit 6/NADH:ubiquinone oxidoreductase 23 kD subunit (chain I) (NuoI) (PDB:1B0P)	COG1143	NADH dehydrogenase	C	Energy production and conversion	MAKIKGAIVVDTERCKGCNLCVVACPLHVIALNAKQVNKKGYTFAHQVLEDTCNGCASCATVCPDGCITVYKVKQQ
4826	GC_00000724		PV29FA01	133	5	5	1	1	1	1	1	COG1143	Formate hydrogenlyase subunit 6/NADH:ubiquinone oxidoreductase 23 kD subunit (chain I) (NuoI) (PDB:1B0P)	COG1143	NADH dehydrogenase	C	Energy production and conversion	MAKIKGAIVVDTERCKGCNLCVVACPLHVIALNAKQVNKKGYTFAHQVLEDTCNGCASCATVCPDGCITVYKVKQQ
4827	GC_00000724		PV2SA01	2524	5	5	1	1	1	1	1	COG1143	Formate hydrogenlyase subunit 6/NADH:ubiquinone oxidoreductase 23 kD subunit (chain I) (NuoI) (PDB:1B0P)	COG1143	NADH dehydrogenase	C	Energy production and conversion	MAKIKGAIVVDTERCKGCNLCVVACPLHVIALNAKQVNKKGYTFAHQVLEDTCNGCASCATVCPDGCITVYKVKQQ
4828	GC_00000724		PV2SA02	3199	5	5	1	1	1	1	1	COG1143	Formate hydrogenlyase subunit 6/NADH:ubiquinone oxidoreductase 23 kD subunit (chain I) (NuoI) (PDB:1B0P)	COG1143	NADH dehydrogenase	C	Energy production and conversion	MAKIKGAIVVDTERCKGCNLCVVACPLHVIALNAKQVNKKGYTFAHQVLEDTCNGCASCATVCPDGCITVYKVKQQ
4909	GC_00000741		PV10SA01	3761	5	5	1	1	1	1	1	COG1143	Formate hydrogenlyase subunit 6/NADH:ubiquinone oxidoreductase 23 kD subunit (chain I) (NuoI) (PDB:1B0P)	COG1143	NADH dehydrogenase	C	Energy production and conversion	MKEEKHSYIKGLLHGIGTLLTGMKVTGREFFTPKVTEQYPENRATLKISPRFRGRLIMPVDENGNNKCIACGLCQMACPNDTITITSESVTNEETGKKKKILVKYEYDLGACMFCQLCVNACPHDAIRFDTEFENAVFDRSKLVLTLNKK
4910	GC_00000741		PV26FA01	2389	5	5	1	1	1	1	1	COG1143	Formate hydrogenlyase subunit 6/NADH:ubiquinone oxidoreductase 23 kD subunit (chain I) (NuoI) (PDB:1B0P)	COG1143	NADH dehydrogenase	C	Energy production and conversion	MKEEKHSYIKGLLHGIGTLLTGMKVTGREFFTPKVTEQYPENRATLKISPRFRGRLIMPVDENGNNKCIACGLCQMACPNDTITITSESVTNEETGKKKKILVKYEYDLGACMFCQLCVNACPHDAIRFDTEFENAVFDRSKLVLTLNKK
4911	GC_00000741		PV29FA01	4115	5	5	1	1	1	1	1	COG1143	Formate hydrogenlyase subunit 6/NADH:ubiquinone oxidoreductase 23 kD subunit (chain I) (NuoI) (PDB:1B0P)	COG1143	NADH dehydrogenase	C	Energy production and conversion	MKEEKHSYIKGLLHGIGTLLTGMKVTGREFFTPKVTEQYPENRATLKISPRFRGRLIMPVDENGNNKCIACGLCQMACPNDTITITSESVTNEETGKKKKILVKYEYDLGACMFCQLCVNACPHDAIRFDTEFENAVFDRSKLVLTLNKK
4912	GC_00000741		PV2SA01	3128	5	5	1	1	1	1	1	COG1143	Formate hydrogenlyase subunit 6/NADH:ubiquinone oxidoreductase 23 kD subunit (chain I) (NuoI) (PDB:1B0P)	COG1143	NADH dehydrogenase	C	Energy production and conversion	MKEEKHSYIKGLLHGIGTLLTGMKVTGREFFTPKVTEQYPENRATLKISPRFRGRLIMPVDENGNNKCIACGLCQMACPNDTITITSESVTNEETGKKKKILVKYEYDLGACMFCQLCVNACPHDAIRFDTEFENAVFDRSKLVLTLNKK
4913	GC_00000741		PV2SA02	3803	5	5	1	1	1	1	1	COG1143	Formate hydrogenlyase subunit 6/NADH:ubiquinone oxidoreductase 23 kD subunit (chain I) (NuoI) (PDB:1B0P)	COG1143	NADH dehydrogenase	C	Energy production and conversion	MKEEKHSYIKGLLHGIGTLLTGMKVTGREFFTPKVTEQYPENRATLKISPRFRGRLIMPVDENGNNKCIACGLCQMACPNDTITITSESVTNEETGKKKKILVKYEYDLGACMFCQLCVNACPHDAIRFDTEFENAVFDRSKLVLTLNKK
10044	GC_00001770		PV10SA01	4242	5	5	1	1	0.999693	1	0.999847	COG1053	Succinate dehydrogenase/fumarate reductase, flavoprotein subunit (SdhA) (PDB:1KF6)	COG1053	TCA cycle	C	Energy production and conversion	MATIDSKIPEGALAEKWTNYKAHQKLVNPANKRRLDIIVVGTGLAGASAAASLGALGFKVLNFCIQDSPRRAHSIAAQGGINAAKNYQNDGDSVYRLFYDTIKGGDYRAREANVYRLAEVSNAIIDQCVAQGVPFAREYGGLLDNRSFGGAQVSRTFYARGQTGQQLLLGAYSALSREVQRGNVKLYTRYEMLDVVLIKDNEGVERARGIIARNLVTGKIERFAAHAVVIGTGGYGNTYFLSTNAMASNGSAAMQVYRKGAYFANPCFAQIHPTCIPVHGDKQSKLTLMSESLRNDGRIWVPKKLEDAKALQAGTKKPTDIPDADRDFYLERRYPAFGNLVPRDVASRAAKERCDAGFGVNNTGLAVFLDFKYAIDRLGEDVVRARYGNLFDMYEEITD…
10045	GC_00001770		PV26FA01	1994	5	5	1	1	0.999693	1	0.999847	COG1053	Succinate dehydrogenase/fumarate reductase, flavoprotein subunit (SdhA) (PDB:1KF6)	COG1053	TCA cycle	C	Energy production and conversion	MATIDSKIPEGALAEKWTNYKAHQKLVNPANKRRLDIIVVGTGLAGASAAASLGALGFKVLNFCIQDSPRRAHSIAAQGGINAAKNYQNDGDSVYRLFYDTIKGGDYRAREANVYRLAEVSNAIIDQCVAQGVPFAREYGGLLDNRSFGGAQVSRTFYARGQTGQQLLLGAYSALSREVQRGNVKLYTRYEMLDVVLIKDNEGVERARGIIARNLVTGKIERFAAHAVVIGTGGYGNTYFLSTNAMASNGSAAMQVYRKGAYFANPCFAQIHPTCIPVHGDKQSKLTLMSESLRNDGRIWVPKKLEDAKALQAGTKKPTDIPDADRDFYLERRYPAFGNLVPRDVASRAAKERCDAGFGVNNTGLAVFLDFKYAIDRLGEDVVRARYGNLFDMYEEITD…
10046	GC_00001770		PV29FA01	3488	5	5	1	1	0.999693	1	0.999847	COG1053	Succinate dehydrogenase/fumarate reductase, flavoprotein subunit (SdhA) (PDB:1KF6)	COG1053	TCA cycle	C	Energy production and conversion	MATIDSKIPEGALAEKWTNYKAHQKLVNPANKRRLDIIVVGTGLAGASAAASLGALGFKVLNFCIQDSPRRAHSIAAQGGINAAKNYQNDGDSVYRLFYDTIKGGDYRAREANVYRLAEVSNAIIDQCVAQGVPFAREYGGLLDNRSFGGAQVSRTFYARGQTGQQLLLGAYSALSREVQRGNVKLYTRYEMLDVVLIKDNEGVERARGIIARNLVTGKIERFAAHAVVIGTGGYGNTYFLSTNAMASNGSAAMQVYRKGAYFANPCFAQIHPTCIPVHGDKQSKLTLMSESLRNDGRIWVPKKLEDAKALQAGTKKPTDIPDADRDFYLERRYPAFGNLVPRDVASRAAKERCDAGFGVNNTGLAVFLDFKYAIDRLGEDVVRARYGNLFDMYEEITD…
10047	GC_00001770		PV2SA01	4101	5	5	1	1	0.999693	1	0.999847	COG1053	Succinate dehydrogenase/fumarate reductase, flavoprotein subunit (SdhA) (PDB:1KF6)	COG1053	TCA cycle	C	Energy production and conversion	MATIDSKIPEGALAEKWTNYKAHQKLVNPANKRRLDIIVVGTGLAGASAAASLGALGFKVLNFCIQDSPRRAHSIAAQGGINAAKNYQNDGDSVYRLFYDTIKGGDYRAREANVYRLAEVSNAIIDQCVAQGVPFAREYGGLLDNRSFGGAQVSRTFYARGQTGQQLLLGAYSALSREVQRGNVKLYTRYEMLDVVLIKDNEGVERARGIIARNLVTGKIERFAAHAVVIGTGGYGNTYFLSTNAMASNGSAAMQVYRKGAYFANPCFAQIHPTCIPVHGDKQSKLTLMSESLRNDGRIWVPKKLEDAKALQAGTKKPTDIPDADRDFYLERRYPAFGNLVPRDVASRAAKERCDAGFGVNNTGLAVFLDFKYAIDRLGEDVVRARYGNLFDMYEEITD…
10048	GC_00001770		PV2SA02	112	5	5	1	1	0.999693	1	0.999847	COG1053	Succinate dehydrogenase/fumarate reductase, flavoprotein subunit (SdhA) (PDB:1KF6)	COG1053	TCA cycle	C	Energy production and conversion	MATIDSKIPEGALAEKWTNYKAHQKLVNPANKRRLDIIVVGTGLAGASAAASLGALGFKVLNFCIQDSPRRAHSIAAQGGINAAKNYQNDGDSVYRLFYDTIKGGDYRAREANVYRLAEVSNAIIDQCVAQGVPFAREYGGLLDNRSFGGAQVSRTFYARGQTGQQLLLGAYSALSREVQRGNVKLYTRYEMLDVVLIKDNEGVERARGIIARNLVTGKIERFAAHAVVIGTGGYGNTYFLSTNAMASNGSAAMQVYRKGAYFANPCFAQIHPTCIPVHGDKQSKLTLMSESLRNDGRIWVPKKLEDAKALQAGTKKPTDIPDADRDFYLERRYPAFGNLVPRDVASRAAKERCDAGFGVNNTGLAVFLDFKYAIDRLGEDVVRARYGNLFDMYEEITD…
15564	GC_00002875		PV10SA01	3552	5	5	1	1	0.995805	1	0.997898	COG1048	Aconitase A (AcnA) (PDB:1ACO)	COG1048	Lysine biosynthesisTCA cycle	C	Energy production and conversion	MVYDLDMLKAFYASFEKKIGRVRAVLQRPLTLAEKILYTHLYDDAQLKNYERGEDYVNFRPDRVAMQDATAQMALLQFINAGKDSAAVPSTVHCDHLIQAYKGAGPDIATATETNREVYDFLRDVSSRFGIGFWKPGAGIIHQVVLENYAFPGGMMVGTDSHTPNAGGLGMVAIGVGGADAVDVMTGMEWELKMPKLIGVHLTGSLNGWASPKDVILKLAGILTVKGGTNAIIEYFGEGTASLSATGKATICNMGAEVGATTSLFPYDDRMAVYLKATGRESVAEMAGKVANDLRADAEVVANPSAFYDRVIEINLSELEPYINGPFTPDAATSISEFAEKVLVNGYPRKMEVGLIGSCTNSSYQDLSRAASIARQVAEKHLAVAAPLIVNPGSEQIRA…
15565	GC_00002875		PV26FA01	2610	5	5	1	1	0.995805	1	0.997898	COG1048	Aconitase A (AcnA) (PDB:1ACO)	COG1048	Lysine biosynthesisTCA cycle	C	Energy production and conversion	MVYDLDMLKAFYASFEKKIGRVRAVLQRPLTLAEKILYTHLYDDAQLKNYERGEDYVNFRPDRVAMQDATAQMALLQFINAGKDSAAVPSTVHCDHLIQAYKGAGPDIATATETNREVYDFLRDVSSRFGIGFWKPGAGIIHQVVLENYAFPGGMMVGTDSHTPNAGGLGMVAIGVGGADAVDVMTGMEWELKMPKLIGVHLTGSLNGWASPKDVILKLAGILTVKGGTNAIIEYFGEGTASLSATGKATICNMGAEVGATTSLFPYDDRMAVYLKATGRESVAEMAGKVANDLRADAEVVANPSAFYDRVIEINLSELEPYINGPFTPDAATPISEFAEKVLVNGYPRKMEVGLIGSCTNSSYQDLSRAASIARQVAEKHLAVAAPLIVNPGSEQIRA…
15566	GC_00002875		PV29FA01	4324	5	5	1	1	0.995805	1	0.997898	COG1048	Aconitase A (AcnA) (PDB:1ACO)	COG1048	Lysine biosynthesisTCA cycle	C	Energy production and conversion	MVYDLDMLKAFYASFEKKIGRVRAVLQRPLTLAEKILYTHLYDDAQLKNYERGEDYVNFRPDRVAMQDATAQMALLQFINAGKDSAAVPSTVHCDHLIQAYKGAGPDIATATETNREVYDFLRDVSSRFGIGFWKPGAGIIHQVVLENYAFPGGMMVGTDSHTPNAGGLGMVAIGVGGADAVDVMTGMEWELKMPKLIGVHLTGSLNGWASPKDVILKLAGILTVKGGTNAIIEYFGEGTASLSATGKATICNMGAEVGATTSLFPYDDRMAVYLKATGRESVAEMAGKVANDLRADAEVVANPSAFYDRVIEINLSELEPYINGPFTPDAATPISEFAEKVLVNGYPRKMEVGLIGSCTNSSYQDLSRAASIARQVAEKHLAVAAPLIVNPGSEQIRA…
15567	GC_00002875		PV2SA01	2934	5	5	1	1	0.995805	1	0.997898	COG1048	Aconitase A (AcnA) (PDB:1ACO)	COG1048	Lysine biosynthesisTCA cycle	C	Energy production and conversion	MVYDLDMLKAFYASFEKKIGRVRAVLQRPLTLAEKILYTHLYDDSQLKNYERGEDYVNFRPDRVAMQDATAQMALLQFINAGKDSAAVPSTVHCDHLIQAYKGAGPDIATATETNREVYDFLRDVSSRFGIGFWKPGAGIIHQVVLENYAFPGGMMVGTDSHTPNAGGLGMVAIGVGGADAVDVMTGMEWELKMPKLIGVHLTGSLNGWASPKDVILKLAGILTVKGGTNAIIEYFGEGTASLSATGKATICNMGAEVGATTSLFPYDDRMAVYLKATGRESVAEMAGKVANDLCADAEVVANPSAFYDRVIEINLSELEPYINGPFTPDAATPISEFAEKVLVNGYPRKMEVGLIGSCTNSSYQDLSRAASIARQVAEKHLAVAAPLIVNPGSEQIRA…
15568	GC_00002875		PV2SA02	3609	5	5	1	1	0.995805	1	0.997898	COG1048	Aconitase A (AcnA) (PDB:1ACO)	COG1048	Lysine biosynthesisTCA cycle	C	Energy production and conversion	MVYDLDMLKAFYASFEKKIGRVRAVLQRPLTLAEKILYTHLYDDSQLKNYERGEDYVNFRPDRVAMQDATAQMALLQFINAGKDSAAVPSTVHCDHLIQAYKGAGPDIATATETNREVYDFLRDVSSRFGIGFWKPGAGIIHQVVLENYAFPGGMMVGTDSHTPNAGGLGMVAIGVGGADAVDVMTGMEWELKMPKLIGVHLTGSLNGWASPKDVILKLAGILTVKGGTNAIIEYFGEGTASLSATGKATICNMGAEVGATTSLFPYDDRMAVYLKATGRESVAEMAGKVANDLCADAEVVANPSAFYDRVIEINLSELEPYINGPFTPDAATPISEFAEKVLVNGYPRKMEVGLIGSCTNSSYQDLSRAASIARQVAEKHLAVAAPLIVNPGSEQIRA…
3504	GC_00000460		PV10SA01	3320	5	5	1	1	1	1	1	COG1014	Pyruvate:ferredoxin oxidoreductase or related 2-oxoacid:ferredoxin oxidoreductase, gamma subunit (PorG) (PDB:1B0P)	COG1014	Pyruvate oxidation	C	Energy production and conversion	MRKDIILSGVGGQGILTIATIIGEAATAEGINLKQAEVHGMSQRGGDVQSNLRLSDETIYSDLIAQGEADLIISMEPMEALRYLPYLQEEGWVITSANPFKNIPDYPEEVDLMRALESLPHVVKLEIEDMAKENSMPKCANVILLGMAAKYIEIVSPEQLRESIGRVFAAKGEKIVEMNQKAFDIGLNAVKNW
3505	GC_00000460		PV26FA01	2895	5	5	1	1	1	1	1	COG1014	Pyruvate:ferredoxin oxidoreductase or related 2-oxoacid:ferredoxin oxidoreductase, gamma subunit (PorG) (PDB:1B0P)	COG1014	Pyruvate oxidation	C	Energy production and conversion	MRKDIILSGVGGQGILTIATIIGEAATAEGINLKQAEVHGMSQRGGDVQSNLRLSDETIYSDLIAQGEADLIISMEPMEALRYLPYLQEEGWVITSANPFKNIPDYPEEVDLMRALESLPHVVKLEIEDMAKENSMPKCANVILLGMAAKYIEIVSPEQLRESIGRVFAAKGEKIVEMNQKAFDIGLNAVKNW
3506	GC_00000460		PV29FA01	104	5	5	1	1	1	1	1	COG1014	Pyruvate:ferredoxin oxidoreductase or related 2-oxoacid:ferredoxin oxidoreductase, gamma subunit (PorG) (PDB:1B0P)	COG1014	Pyruvate oxidation	C	Energy production and conversion	MRKDIILSGVGGQGILTIATIIGEAATAEGINLKQAEVHGMSQRGGDVQSNLRLSDETIYSDLIAQGEADLIISMEPMEALRYLPYLQEEGWVITSANPFKNIPDYPEEVDLMRALESLPHVVKLEIEDMAKENSMPKCANVILLGMAAKYIEIVSPEQLRESIGRVFAAKGEKIVEMNQKAFDIGLNAVKNW
3507	GC_00000460		PV2SA01	2552	5	5	1	1	1	1	1	COG1014	Pyruvate:ferredoxin oxidoreductase or related 2-oxoacid:ferredoxin oxidoreductase, gamma subunit (PorG) (PDB:1B0P)	COG1014	Pyruvate oxidation	C	Energy production and conversion	MRKDIILSGVGGQGILTIATIIGEAATAEGINLKQAEVHGMSQRGGDVQSNLRLSDETIYSDLIAQGEADLIISMEPMEALRYLPYLQEEGWVITSANPFKNIPDYPEEVDLMRALESLPHVVKLEIEDMAKENSMPKCANVILLGMAAKYIEIVSPEQLRESIGRVFAAKGEKIVEMNQKAFDIGLNAVKNW
3508	GC_00000460		PV2SA02	3227	5	5	1	1	1	1	1	COG1014	Pyruvate:ferredoxin oxidoreductase or related 2-oxoacid:ferredoxin oxidoreductase, gamma subunit (PorG) (PDB:1B0P)	COG1014	Pyruvate oxidation	C	Energy production and conversion	MRKDIILSGVGGQGILTIATIIGEAATAEGINLKQAEVHGMSQRGGDVQSNLRLSDETIYSDLIAQGEADLIISMEPMEALRYLPYLQEEGWVITSANPFKNIPDYPEEVDLMRALESLPHVVKLEIEDMAKENSMPKCANVILLGMAAKYIEIVSPEQLRESIGRVFAAKGEKIVEMNQKAFDIGLNAVKNW
6564	GC_00001074		PV10SA01	3295	5	5	1	1	1	1	1	COG1014	Pyruvate:ferredoxin oxidoreductase or related 2-oxoacid:ferredoxin oxidoreductase, gamma subunit (PorG) (PDB:1B0P)	COG1014	Pyruvate oxidation	C	Energy production and conversion	MKQEIIIAGFGGQGVLSMGKILAYSGLMEDKEVTWMPAYGPEQRGGTANVTVIVSDERISSPILSQYDTAIILNQPSLEKFEGKIKPGGILIYDGYGIIEPPTRKDIQIYRIDAMDAANEKGMAKTFNMIVLGGLLKLRPVVSIESVIKALRKTLPERHHHLIPMNEEAIRIGMEIIKPQ
6565	GC_00001074		PV26FA01	2920	5	5	1	1	1	1	1	COG1014	Pyruvate:ferredoxin oxidoreductase or related 2-oxoacid:ferredoxin oxidoreductase, gamma subunit (PorG) (PDB:1B0P)	COG1014	Pyruvate oxidation	C	Energy production and conversion	MKQEIIIAGFGGQGVLSMGKILAYSGLMEDKEVTWMPAYGPEQRGGTANVTVIVSDERISSPILSQYDTAIILNQPSLEKFEGKIKPGGILIYDGYGIIEPPTRKDIQIYRIDAMDAANEKGMAKTFNMIVLGGLLKLRPVVSIESVIKALRKTLPERHHHLIPMNEEAIRIGMEIIKPQ
6566	GC_00001074		PV29FA01	129	5	5	1	1	1	1	1	COG1014	Pyruvate:ferredoxin oxidoreductase or related 2-oxoacid:ferredoxin oxidoreductase, gamma subunit (PorG) (PDB:1B0P)	COG1014	Pyruvate oxidation	C	Energy production and conversion	MKQEIIIAGFGGQGVLSMGKILAYSGLMEDKEVTWMPAYGPEQRGGTANVTVIVSDERISSPILSQYDTAIILNQPSLEKFEGKIKPGGILIYDGYGIIEPPTRKDIQIYRIDAMDAANEKGMAKTFNMIVLGGLLKLRPVVSIESVIKALRKTLPERHHHLIPMNEEAIRIGMEIIKPQ
6567	GC_00001074		PV2SA01	2528	5	5	1	1	1	1	1	COG1014	Pyruvate:ferredoxin oxidoreductase or related 2-oxoacid:ferredoxin oxidoreductase, gamma subunit (PorG) (PDB:1B0P)	COG1014	Pyruvate oxidation	C	Energy production and conversion	MKQEIIIAGFGGQGVLSMGKILAYSGLMEDKEVTWMPAYGPEQRGGTANVTVIVSDERISSPILSQYDTAIILNQPSLEKFEGKIKPGGILIYDGYGIIEPPTRKDIQIYRIDAMDAANEKGMAKTFNMIVLGGLLKLRPVVSIESVIKALRKTLPERHHHLIPMNEEAIRIGMEIIKPQ
6568	GC_00001074		PV2SA02	3203	5	5	1	1	1	1	1	COG1014	Pyruvate:ferredoxin oxidoreductase or related 2-oxoacid:ferredoxin oxidoreductase, gamma subunit (PorG) (PDB:1B0P)	COG1014	Pyruvate oxidation	C	Energy production and conversion	MKQEIIIAGFGGQGVLSMGKILAYSGLMEDKEVTWMPAYGPEQRGGTANVTVIVSDERISSPILSQYDTAIILNQPSLEKFEGKIKPGGILIYDGYGIIEPPTRKDIQIYRIDAMDAANEKGMAKTFNMIVLGGLLKLRPVVSIESVIKALRKTLPERHHHLIPMNEEAIRIGMEIIKPQ
8374	GC_00001436		PV10SA01	237	5	5	1	1	0.999601	1	0.9998	COG1013	Pyruvate:ferredoxin oxidoreductase or related 2-oxoacid:ferredoxin oxidoreductase, beta subunit (PorB) (PDB:1B0P)	COG1013	Pyruvate oxidation	C	Energy production and conversion	MNEYTAKDFKKGQPRWCPGCGDHFFLASLHKAMAELGVAPHDTAVISGIGCSSRLPYYMNTYAMQTVHGRAAAISTGCKVANPKITVWQISGDGDGLAIGGNHFIHAVRRNIDLNMILLNNRIYGLTKGQYSPTSPRGFVSKSSPYGTVEDPFHPAELCFGARGRFFARAVATDGPGTVEILKAAANHKGAAVCEILQNCVIFNDGTHESVYTKEGRSKNAIYLEHGKPMLFGVDKEYGLMQEGFGLKVVKLGENGVTEKDILVHDAHCMDNTLQLKLALMEGPDFPVALGVIRDVEAPTYDDAVNAQIEEVAAKKKYHNFQELLMTNDIWEVK
8375	GC_00001436		PV26FA01	1726	5	5	1	1	0.999601	1	0.9998	COG1013	Pyruvate:ferredoxin oxidoreductase or related 2-oxoacid:ferredoxin oxidoreductase, beta subunit (PorB) (PDB:1B0P)	COG1013	Pyruvate oxidation	C	Energy production and conversion	MNEYTAKDFKKGQPRWCPGCGDHFFLASLHKAMAELGVAPHDTAVISGIGCSSRLPYYMNTYAMQTVHGRAAAISTGCKVANPKITVWQISGDGDGLAIGGNHFIHAVRRNIDLNMILLNNRIYGLTKGQYSPTSPRGFVSKSSPYGTVEDPFHPAELCFGARGRFFARAVATDGPGTVEILKAAANHKGAAVCEILQNCVIFNDGTHESVYTKEGRSKNAIYLEHGKPMLFGVDKEYGLMQEGFGLKVVKLGENGVTEKDILVHDAHCMDNTLQLKLALMEGPDFPVALGVIRDVEAPTYDDAVNAQIEEVAAKKKYHNFQELLMTNDIWEVK
8376	GC_00001436		PV29FA01	3832	5	5	1	1	0.999601	1	0.9998	COG1013	Pyruvate:ferredoxin oxidoreductase or related 2-oxoacid:ferredoxin oxidoreductase, beta subunit (PorB) (PDB:1B0P)	COG1013	Pyruvate oxidation	C	Energy production and conversion	MNEYTAKDFKKGQPRWCPGCGDHFFLASLHKAMAELGVAPHDTAVISGIGCSSRLPYYMNTYAMQTVHGRAAAISTGCKVANPKITVWQISGDGDGLAIGGNHFIHAVRRNIDLNMILLNNRIYGLTKGQYSPTSPRGFVSKSSPYGTVEDPFHPAELCFGARGRFFARAVATDGPGTVEILKAAANHKGAAVCEILQNCVIFNDGTHESVYTKEGRSKNAIYLEHGKPMLFGVDKEYGLMQEGFGLKVVKIGENGVTEKDILVHDAHCMDNTLQLKLALMEGPDFPVALGVIRDVEAPTYDDAVNAQIEEVAAKKKYHNFQELLMTNDIWEVK
8377	GC_00001436		PV2SA01	3842	5	5	1	1	0.999601	1	0.9998	COG1013	Pyruvate:ferredoxin oxidoreductase or related 2-oxoacid:ferredoxin oxidoreductase, beta subunit (PorB) (PDB:1B0P)	COG1013	Pyruvate oxidation	C	Energy production and conversion	MNEYTAKDFKKGQPRWCPGCGDHFFLASLHKAMAELGVAPHDTAVISGIGCSSRLPYYMNTYAMQTVHGRAAAISTGCKVANPKITVWQISGDGDGLAIGGNHFIHAVRRNIDLNMILLNNRIYGLTKGQYSPTSPRGFVSKSSPYGTVEDPFHPAELCFGARGRFFARAVATDGPGTVEILKAAANHKGAAVCEILQNCVIFNDGTHESVYTKEGRSKNAIYLEHGKPMLFGVDKEYGLMQEGFGLKVVKLGENGVTEKDILVHDAHCMDNTLQLKLALMEGPDFPVALGVIRDVEAPTYDDAVNAQIEEVAAKKKYHNFQELLMTNDIWEVK
8378	GC_00001436		PV2SA02	325	5	5	1	1	0.999601	1	0.9998	COG1013	Pyruvate:ferredoxin oxidoreductase or related 2-oxoacid:ferredoxin oxidoreductase, beta subunit (PorB) (PDB:1B0P)	COG1013	Pyruvate oxidation	C	Energy production and conversion	MNEYTAKDFKKGQPRWCPGCGDHFFLASLHKAMAELGVAPHDTAVISGIGCSSRLPYYMNTYAMQTVHGRAAAISTGCKVANPKITVWQISGDGDGLAIGGNHFIHAVRRNIDLNMILLNNRIYGLTKGQYSPTSPRGFVSKSSPYGTVEDPFHPAELCFGARGRFFARAVATDGPGTVEILKAAANHKGAAVCEILQNCVIFNDGTHESVYTKEGRSKNAIYLEHGKPMLFGVDKEYGLMQEGFGLKVVKLGENGVTEKDILVHDAHCMDNTLQLKLALMEGPDFPVALGVIRDVEAPTYDDAVNAQIEEVAAKKKYHNFQELLMTNDIWEVK
10839	GC_00001929		PV10SA01	3294	5	5	1	1	0.997638	1	0.998818	COG1013	Pyruvate:ferredoxin oxidoreductase or related 2-oxoacid:ferredoxin oxidoreductase, beta subunit (PorB) (PDB:1B0P)	COG1013	Pyruvate oxidation	C	Energy production and conversion	MTKEEIIKPENLVYKKPTLMNDNPMHYCPGCSHGVVHKLIAEVIEEMGMEDKTIGVSPVGCAVFAYNYLDIDWQEAAHGRAPAVATAIKRLWPGRLVFTYQGDGDLACIGTAETIHALNRGENITIIFINNAIYGMTGGQMAPTTLVGMKTATCPYGRDVAIHGYPLKMTEIAATLEGTAYVTRQAVHTVPAIRKAKKAIRKAFENSMNGKGSNLVEIVSTCNSGWKMTPQASNDWMVEHMFPFYPLGDLKDKE
10840	GC_00001929		PV26FA01	2921	5	5	1	1	0.997638	1	0.998818	COG1013	Pyruvate:ferredoxin oxidoreductase or related 2-oxoacid:ferredoxin oxidoreductase, beta subunit (PorB) (PDB:1B0P)	COG1013	Pyruvate oxidation	C	Energy production and conversion	MTKEEIIKPENLVYKKPTLMNDNPMHYCPGCSHGVVHKLIAEVIEEMGMEDKTIGVSPVGCAVFAYNYLDIDWQEAAHGRAPAVATAIKRLWPGRLVFTYQGDGDLACIGTAETIHALNRGENITIIFINNAIYGMTGGQMAPTTLVGMKTATCPYGRDVAIHGYPLKMTEIAATLEGTAYVTRQAVHTVPAIRKAKKAIRKAFENSMNGKGSNLVEIVSTCNSGWKMTPQASNDWMVEHMFPFYPLGDLKDKE
10841	GC_00001929		PV29FA01	130	5	5	1	1	0.997638	1	0.998818	COG1013	Pyruvate:ferredoxin oxidoreductase or related 2-oxoacid:ferredoxin oxidoreductase, beta subunit (PorB) (PDB:1B0P)	COG1013	Pyruvate oxidation	C	Energy production and conversion	MTKEEIIKPENLVYKKPTLMNDNPMHYCPGCSHGVVHKLIAEVIEEMGMEDKTIGVSPVGCAVFAYNYLDIDWQEAAHGRAPAVATAIKRLWPGRLVFTYQGDGDLACIGTAETIHALNRGENITIIFINNAIYGMTGGQMAPTTLVGMKTATCPYGRDVAIHGYPLKMTEIAATLEGTAYVTRQAVHTVPAIRKAKKAIRKAFENSMNGKGSNLVEIVSTCNSGWKMTPQASNDWMVEHMFPFYPLGDLKDKE
10842	GC_00001929		PV2SA01	2527	5	5	1	1	0.997638	1	0.998818	COG1013	Pyruvate:ferredoxin oxidoreductase or related 2-oxoacid:ferredoxin oxidoreductase, beta subunit (PorB) (PDB:1B0P)	COG1013	Pyruvate oxidation	C	Energy production and conversion	MTKEEIIKPENLVYKKPTLMNDNPMHYCPGCSHGVVHKLIAEVIEEMGMEDKAIGVSPVGCAVFAYNYLDIDWQEAAHGRAPAVATAIKRLWPGRLVFTYQGDGDLACIGTAETIHALNRGENITIIFINNAIYGMTGGQMAPTTLVGMKTATCPYGRDVAIHGYPLKMTEIAATLEGTAYVTRQAVHTVPAIRKAKKAIRKAFENSMNGKGSNLVEIVSTCNSGWKMTPQASNDWMVEHMFPFYPLGDLKDKE
10843	GC_00001929		PV2SA02	3202	5	5	1	1	0.997638	1	0.998818	COG1013	Pyruvate:ferredoxin oxidoreductase or related 2-oxoacid:ferredoxin oxidoreductase, beta subunit (PorB) (PDB:1B0P)	COG1013	Pyruvate oxidation	C	Energy production and conversion	MTKEEIIKPENLVYKKPTLMNDNPMHYCPGCSHGVVHKLIAEVIEEMGMEDKAIGVSPVGCAVFAYNYLDIDWQEAAHGRAPAVATAIKRLWPGRLVFTYQGDGDLACIGTAETIHALNRGENITIIFINNAIYGMTGGQMAPTTLVGMKTATCPYGRDVAIHGYPLKMTEIAATLEGTAYVTRQAVHTVPAIRKAKKAIRKAFENSMNGKGSNLVEIVSTCNSGWKMTPQASNDWMVEHMFPFYPLGDLKDKE
11574	GC_00002076		PV10SA01	3764	5	5	1	1	0.996209	1	0.998101	COG1009	Membrane H+-translocase/NADH:ubiquinone oxidoreductase subunit 5 (chain L)/Multisubunit Na+/H+ antiporter, MnhA subunit (NuoL) (PDB:3RKO)	COG1009	NADH dehydrogenase	C	Energy production and conversion	MEHTILILILPFLSFLILGLAGMRMKNGLAGTIGTVSLAGVTLLSYLTAFNYFAGGRTAEGVYPTLTPYNFEWLPFTTNLHIDMGIMLDPISVMMLVVISTVSLMVHIYSFGYMKGEKGFQRYYAFLSLFTMSMLGLVVATNIFQMYVFWELVGVSSYLLIGFYYTKKEAIAASKKAFIVTRFADLGFLIGILIYGYYAETFSFTPQLQVLAVAGSMIPLALGLMFIGGAGKSAMFPLHIWLPDAMEGPTPVSALIHAATMVVAGVYLVARMFPLFVGYAPEVLHWIAYIGAFTAFYAASVACAQSDIKRVLAFSTISQIGFMIVALGVCTSMNPHEGGLGYMASMFHLFTHAMFKALLFLGAGCIIHAVHSNEMSAMGGLHKFMPVTHWTFLIACLAI…
11575	GC_00002076		PV26FA01	2386	5	5	1	1	0.996209	1	0.998101	COG1009	Membrane H+-translocase/NADH:ubiquinone oxidoreductase subunit 5 (chain L)/Multisubunit Na+/H+ antiporter, MnhA subunit (NuoL) (PDB:3RKO)	COG1009	NADH dehydrogenase	C	Energy production and conversion	MEHTILILILPFLSFLILGLAGMRMKNGLAGTIGTVSLAGVTLLSYLTAFNYFAGGRTAEGVYPTLTPYNFEWLPFTTNLHIDMGIMLDPISVMMLVVISTVSLMVHIYSFGYMKGEKGFQRYYAFLSLFTMSMLGLVVATNIFQMYVFWELVGVSSYLLIGFYYTKKEAIAASKKAFIVTRFADLGFLIGILIYGYYAETFSFTPQLQVLAVAGSMIPLALGLMFIGGAGKSAMFPLHIWLPDAMEGPTPVSALIHAATMVVAGVYLVARMFPLFIGYAPEVLHWIAYIGAFTAFYAASVACAQSDIKRVLAFSTISQIGFMIVALGVCTSMNPHEGGLGYMASMFHLFTHAMFKALLFLGAGCIIHAVHSNEMSAMGGLHKFMPVTHWTFLIACLAI…
11576	GC_00002076		PV29FA01	4112	5	5	1	1	0.996209	1	0.998101	COG1009	Membrane H+-translocase/NADH:ubiquinone oxidoreductase subunit 5 (chain L)/Multisubunit Na+/H+ antiporter, MnhA subunit (NuoL) (PDB:3RKO)	COG1009	NADH dehydrogenase	C	Energy production and conversion	MEHTILILILPFLSFLILGLAGMRMKNGLAGTIGTVSLAGVTLLSYLTAFNYFAGGRTAEGVYPTLTPYNFEWLPFTTNLHIDMGIMFDPISVMMLVVISTVSLMVHIYSFGYMKGEKGFQRYYAFLSLFTMSMLGLVVATNIFQMYVFWELVGVSSYLLIGFYYTKKEAIAASKKAFIVTRFADLGFLIGILIYGYYAETFSFTPQLQVLAVAGSMIPLALGLMFIGGAGKSAMFPLHIWLPDAMEGPTPVSALIHAATMVVAGVYLVARMFPLFIGYAPEVLHWIAYIGAFTAFYAASVACAQSDIKRVLAFSTISQIGFMIVALGVCTSMNPHEGGLGYMASMFHLFTHAMFKALLFLGAGCIIHAVHSNEMSAMGGLHKFMPVTHWTFLIACLAI…
11577	GC_00002076		PV2SA01	3131	5	5	1	1	0.996209	1	0.998101	COG1009	Membrane H+-translocase/NADH:ubiquinone oxidoreductase subunit 5 (chain L)/Multisubunit Na+/H+ antiporter, MnhA subunit (NuoL) (PDB:3RKO)	COG1009	NADH dehydrogenase	C	Energy production and conversion	MEHTILILILPFLSFLILGLAGMRMKNGLAGTIGTVSLAGVTLLSYLTAFNYFAGGRTAEGVYPTLTPYNFEWLPFTTNLHIDMGIMLDPISVMMLVVISTVSLMVHIYSFGYMKGEKGFQRYYAFLSLFTMSMLGLVVATNIFQMYVFWELVGVSSYLLIGFYYTKKEAIAASKKAFIVTRFADLGFLIGILIYGYYAETFSFTPQLQVLAVAGSMIPLALGLMFIGGAGKSAMFPLHIWLPDAMEGPTPVSALIHAATMVVAGVYLVARMFPLFVGYAPEVLHWIAYIGAFTAFYAASVACAQSDIKRVLAFSTISQIGFMIVALGVCTSMNPHEGGLGYMASMFHLFTHAMFKALLFLGAGCIIHAVHSNEMSAMGGLHKFMPVTHWTFLIACLAI…
11578	GC_00002076		PV2SA02	3806	5	5	1	1	0.996209	1	0.998101	COG1009	Membrane H+-translocase/NADH:ubiquinone oxidoreductase subunit 5 (chain L)/Multisubunit Na+/H+ antiporter, MnhA subunit (NuoL) (PDB:3RKO)	COG1009	NADH dehydrogenase	C	Energy production and conversion	MEHTILILILPFLSFLILGLAGMRMKNGLAGTIGTVSLAGVTLLSYLTAFNYFAGGRTAEGVYPTLTPYNFEWLPFTTNLHIDMGIMLDPISVMMLVVISTVSLMVHIYSFGYMKGEKGFQRYYAFLSLFTMSMLGLVVATNIFQMYVFWELVGVSSYLLIGFYYTKKEAIAASKKAFIVTRFADLGFLIGILIYGYYAETFSFTPQLQVLAVAGSMIPLALGLMFIGGAGKSAMFPLHIWLPDAMEGPTPVSALIHAATMVVAGVYLVARMFPLFVGYAPEVLHWIAYIGAFTAFYAASVACAQSDIKRVLAFSTISQIGFMIVALGVCTSMNPHEGGLGYMASMFHLFTHAMFKALLFLGAGCIIHAVHSNEMSAMGGLHKFMPVTHWTFLIACLAI…
7369	GC_00001235		PV10SA01	3765	5	5	1	1	0.99973	1	0.999865	COG1008	NADH:ubiquinone oxidoreductase subunit 4 (chain M) (NuoM) (PDB:6HUM)	COG1008	NADH dehydrogenase	C	Energy production and conversion	MNILSFFIIVPLLMLASLWASRSVNQVRGVMVVGSSILLALSVYLTIDYIELRQAGATGEMLFTASTVWYAPLHICYSVGVDGISVAMLLLSSIIVFTGTFASWKLQPLTKEYFMWFTLLSVGVFGFFVSTDLFTMFMFYEVALIPMYLLIGVWGSGRKEYAAMKLTLMLMGGSAFLLIGILGIFYGAGGETMNLLEIAKLHIPHEMQRIFFPLIFLGFGVLGALFPFHTWSPDGHASAPTAVSMLHAGVLMKLGGYGCFRVAMYLMPEGAAMWGDVFLILTTISVVYGAFSAVVQTDLKYINAYSSVSHCGLVLFALLMMTRTSCTGAILQMLSHGLMTALFFALIGMIYGRTHTRDVRLMGGLMKIMPFLAVGYVIAGLANLGLPGLSGFVAEMTVF…
7370	GC_00001235		PV26FA01	2385	5	5	1	1	0.99973	1	0.999865	COG1008	NADH:ubiquinone oxidoreductase subunit 4 (chain M) (NuoM) (PDB:6HUM)	COG1008	NADH dehydrogenase	C	Energy production and conversion	MNILSFFIIVPLLMLASLWASRSVNQVRGVMVVGSSILLALSVYLTIDYIELRQAGATGEMLFTASTVWYAPLHICYSVGVDGISVAMLLLSSIIVFTGTFASWKLQPLTKEYFMWFTLLSVGVFGFFVSTDLFTMFMFYEVALIPMYLLIGVWGSGRKEYAAMKLTLMLMGGSAFLLIGILGIFYGAGGETMNLLEIAKLHIPHEMQRIFFPLIFLGFGVLGALFPFHTWSPDGHASAPTAVSMLHAGVLMKLGGYGCFRVAMYLMPEGAAMWGDIFLILTTISVVYGAFSAVVQTDLKYINAYSSVSHCGLVLFALLMMTRTSCTGAILQMLSHGLMTALFFALIGMIYGRTHTRDVRLMGGLMKIMPFLAVGYVIAGLANLGLPGLSGFVAEMTVF…
7371	GC_00001235		PV29FA01	4111	5	5	1	1	0.99973	1	0.999865	COG1008	NADH:ubiquinone oxidoreductase subunit 4 (chain M) (NuoM) (PDB:6HUM)	COG1008	NADH dehydrogenase	C	Energy production and conversion	MNILSFFIIVPLLMLASLWASRSVNQVRGVMVVGSSILLALSVYLTIDYIELRQAGATGEMLFTASTVWYAPLHICYSVGVDGISVAMLLLSSIIVFTGTFASWKLQPLTKEYFMWFTLLSVGVFGFFVSTDLFTMFMFYEVALIPMYLLIGVWGSGRKEYAAMKLTLMLMGGSAFLLIGILGIFYGAGGETMNLLEIAKLHIPHEMQRIFFPLIFLGFGVLGALFPFHTWSPDGHASAPTAVSMLHAGVLMKLGGYGCFRVAMYLMPEGAAMWGDVFLILTTISVVYGAFSAVVQTDLKYINAYSSVSHCGLVLFALLMMTRTSCTGAILQMLSHGLMTALFFALIGMIYGRTHTRDVRLMGGLMKIMPFLAVGYVIAGLANLGLPGLSGFVAEMTVF…
7372	GC_00001235		PV2SA01	3132	5	5	1	1	0.99973	1	0.999865	COG1008	NADH:ubiquinone oxidoreductase subunit 4 (chain M) (NuoM) (PDB:6HUM)	COG1008	NADH dehydrogenase	C	Energy production and conversion	MNILSFFIIVPLLMLASLWASRSVNQVRGVMVVGSSILLALSVYLTIDYIELRQAGATGEMLFTASTVWYAPLHICYSVGVDGISVAMLLLSSIIVFTGTFASWKLQPLTKEYFMWFTLLSVGVFGFFVSTDLFTMFMFYEVALIPMYLLIGVWGSGRKEYAAMKLTLMLMGGSAFLLIGILGIFYGAGGETMNLLEIAKLHIPHEMQRIFFPLIFLGFGVLGALFPFHTWSPDGHASAPTAVSMLHAGVLMKLGGYGCFRVAMYLMPEGAAMWGDVFLILTTISVVYGAFSAVVQTDLKYINAYSSVSHCGLVLFALLMMTRTSCTGAILQMLSHGLMTALFFALIGMIYGRTHTRDVRLMGGLMKIMPFLAVGYVIAGLANLGLPGLSGFVAEMTVF…
7373	GC_00001235		PV2SA02	3807	5	5	1	1	0.99973	1	0.999865	COG1008	NADH:ubiquinone oxidoreductase subunit 4 (chain M) (NuoM) (PDB:6HUM)	COG1008	NADH dehydrogenase	C	Energy production and conversion	MNILSFFIIVPLLMLASLWASRSVNQVRGVMVVGSSILLALSVYLTIDYIELRQAGATGEMLFTASTVWYAPLHICYSVGVDGISVAMLLLSSIIVFTGTFASWKLQPLTKEYFMWFTLLSVGVFGFFVSTDLFTMFMFYEVALIPMYLLIGVWGSGRKEYAAMKLTLMLMGGSAFLLIGILGIFYGAGGETMNLLEIAKLHIPHEMQRIFFPLIFLGFGVLGALFPFHTWSPDGHASAPTAVSMLHAGVLMKLGGYGCFRVAMYLMPEGAAMWGDVFLILTTISVVYGAFSAVVQTDLKYINAYSSVSHCGLVLFALLMMTRTSCTGAILQMLSHGLMTALFFALIGMIYGRTHTRDVRLMGGLMKIMPFLAVGYVIAGLANLGLPGLSGFVAEMTVF…
11659	GC_00002093		PV10SA01	3766	5	5	1	1	0.998732	1	0.999365	COG1007	NADH:ubiquinone oxidoreductase subunit 2 (chain N) (NuoN) (PDB:4HE8)	COG1007	NADH dehydrogenase	C	Energy production and conversion	MMDITAILHMHAELSLTAVFILMFLLDLFLPATQRHWLRPMACILLTIQLLANLWPEEVTLFGGMYHSTPMASVLKSILTIGTILVFLQADTWLKREDTRHKQGEFYILTLSTLLGMYFMVSAGHFLLFFLGLELATVPMACLVAFDKYKGHSAEAGAKFILSALFSSGIFLYGISMIYGTAGTLYFEDIPAGLTGTPLQVLALVFFFSGLAFKLSLVPFHLWTADTYQGAPTTVSAYLSVISKGAAAFALMIILMKVFGPMTEQWSEILCIIIVATITIANLFAIRQNNLKRFMAFSSISQAGYIMLAVLAGTPQGMASLVYYIVVYIAANLAVFGVINTIEQHTHGKIEREDYNGLYKTNPKLTMVMTLALFSLAGIPPFAGFFSKFFVFMAAFHSG…
11660	GC_00002093		PV26FA01	2384	5	5	1	1	0.998732	1	0.999365	COG1007	NADH:ubiquinone oxidoreductase subunit 2 (chain N) (NuoN) (PDB:4HE8)	COG1007	NADH dehydrogenase	C	Energy production and conversion	MMDITAILHMHAELSLTAVFILMFLLDLFLPAPQRHWLRPMACILLTIQLLANLWPEEVTLFGGMYHSTPMASVLKSILTIGTILVFLQADTWLKREDTRHKQGEFYILTLSTLLGMYFMVSAGHFLLFFLGLELATVPMACLVAFDKYKGHSAEAGAKFILSALFSSGIFLYGISMIYGTAGTLYFEDIPAGLTGTPLQVLALVFFFSGLAFKLSLVPFHLWTADTYQGAPTTVSAYLSVISKGAAAFALMIILMKVFGPMTEQWSEILCIIIVATITIANLFAIRQNNLKRFMAFSSISQAGYIMLAVLAGTPQGMASLVYYIVVYIAANLAVFGVINTIEQHTHGKIEREDYNGLYKTNPKLTMVMTLALFSLAGIPPFAGFFSKFFVFMAAFHSG…
11661	GC_00002093		PV29FA01	4110	5	5	1	1	0.998732	1	0.999365	COG1007	NADH:ubiquinone oxidoreductase subunit 2 (chain N) (NuoN) (PDB:4HE8)	COG1007	NADH dehydrogenase	C	Energy production and conversion	MMDITAILHMHAELSLTAVFILMFLLDLFLPAPQRHWLRPMACILLTIQLLANLWPEEVTLFGGMYHSTPMASVLKSILTIGTILVFLQADTWLKREDTRHKQGEFYILTLSTLLGMYFMVSAGHFLLFFLGLELATVPMACLVAFDKYKGHSAEAGAKFILSALFSSGIFLYGISMIYGTAGTLYFEDIPAGLTGTPLQVLALVFFFSGLAFKLSLVPFHLWTADTYQGAPTTVSAYLSVISKGAAAFALMIILMKVFGPMTEQWSEILCIIIVATITIANLFAIRQNNLKRFMAFSSISQAGYIMLAVLAGTPQGMASLVYYIVVYIAANLAVFGVINTIEQHTHGKIEREDYNGLYKTNPKLTMVMTLALFSLAGIPPFAGFFSKFFVFMAAFHSG…
11662	GC_00002093		PV2SA01	3133	5	5	1	1	0.998732	1	0.999365	COG1007	NADH:ubiquinone oxidoreductase subunit 2 (chain N) (NuoN) (PDB:4HE8)	COG1007	NADH dehydrogenase	C	Energy production and conversion	MMDITAILHMHAELSLTAVFILMFLLDLFLPATQRHWLRPMACILLTIQLLANLWPEEVTLFGGMYHSTPMASVLKSILTIGTILVFLQADTWLKREDTRHKQGEFYILTLSTLLGMYFMVSAGHFLLFFLGLELATVPMACLVAFDKYKGHSAEAGAKFILSALFSSGIFLYGISMIYGTAGTLYFEDIPAGLTGTPLQVLALVFFFSGLAFKLSLVPFHLWTADTYQGAPTTVSAYLSVISKGAAAFALMIILMKVFGPMTEQWSEILCIIIVATITIANLFAIRQNNLKRFMAFSSISQAGYIMLAVLAGTPQGMASLVYYIVVYIAANLAVFGVINTIEQHTHGKIEREDYNGLYKTNPKLTMVMTLALFSLAGIPPFAGFFSKFFVFMAAFHSG…
11663	GC_00002093		PV2SA02	3808	5	5	1	1	0.998732	1	0.999365	COG1007	NADH:ubiquinone oxidoreductase subunit 2 (chain N) (NuoN) (PDB:4HE8)	COG1007	NADH dehydrogenase	C	Energy production and conversion	MMDITAILHMHAELSLTAVFILMFLLDLFLPATQRHWLRPMACILLTIQLLANLWPEEVTLFGGMYHSTPMASVLKSILTIGTILVFLQADTWLKREDTRHKQGEFYILTLSTLLGMYFMVSAGHFLLFFLGLELATVPMACLVAFDKYKGHSAEAGAKFILSALFSSGIFLYGISMIYGTAGTLYFEDIPAGLTGTPLQVLALVFFFSGLAFKLSLVPFHLWTADTYQGAPTTVSAYLSVISKGAAAFALMIILMKVFGPMTEQWSEILCIIIVATITIANLFAIRQNNLKRFMAFSSISQAGYIMLAVLAGTPQGMASLVYYIVVYIAANLAVFGVINTIEQHTHGKIEREDYNGLYKTNPKLTMVMTLALFSLAGIPPFAGFFSKFFVFMAAFHSG…
2834	GC_00000326		PV10SA01	3760	5	5	1	1	1	1	1	COG1005	NADH:ubiquinone oxidoreductase subunit 1 (chain H) (NuoH) (PDB:6HUM)	COG1005	NADH dehydrogenase	C	Energy production and conversion	MFDFSIVTQWVHSLLTSFMPEELAVLIECIVIGVCIMLAYAVIAIIMIFMERKVCAAFQCRLGPMRVGPQGTIQVFADVFKMLIKEIITIRHADKFLYNLAPYIVILASIMAFSCLPINKGMEVLDFNVGIFFLLAASSIGVVGILLAGWSSNNKYSLIGAMRSGAQMISYELSVGLSILTIVILTDTMQLSEIVERQADGWFLFKGHIPALIAFIIYLIAGNAEVNRGPFDLPEAESELTAGYHTEYSGMHFGLFYVAEFVNLFIIAAVATTIFLGGWMPLHIPGLDGFNAIMDYIPGFIWFFGKSFFVVWLLMWIKWTFPRLRIDQILTLEWKYLVPIGLCNLLLMVIIVVFKLHF
2835	GC_00000326		PV26FA01	2390	5	5	1	1	1	1	1	COG1005	NADH:ubiquinone oxidoreductase subunit 1 (chain H) (NuoH) (PDB:6HUM)	COG1005	NADH dehydrogenase	C	Energy production and conversion	MFDFSIVTQWVHSLLTSFMPEELAVLIECIVIGVCIMLAYAVIAIIMIFMERKVCAAFQCRLGPMRVGPQGTIQVFADVFKMLIKEIITIRHADKFLYNLAPYIVILASIMAFSCLPINKGMEVLDFNVGIFFLLAASSIGVVGILLAGWSSNNKYSLIGAMRSGAQMISYELSVGLSILTIVILTDTMQLSEIVERQADGWFLFKGHIPALIAFIIYLIAGNAEVNRGPFDLPEAESELTAGYHTEYSGMHFGLFYVAEFVNLFIIAAVATTIFLGGWMPLHIPGLDGFNAIMDYIPGFIWFFGKSFFVVWLLMWIKWTFPRLRIDQILTLEWKYLVPIGLCNLLLMVIIVVFKLHF
2836	GC_00000326		PV29FA01	4116	5	5	1	1	1	1	1	COG1005	NADH:ubiquinone oxidoreductase subunit 1 (chain H) (NuoH) (PDB:6HUM)	COG1005	NADH dehydrogenase	C	Energy production and conversion	MFDFSIVTQWVHSLLTSFMPEELAVLIECIVIGVCIMLAYAVIAIIMIFMERKVCAAFQCRLGPMRVGPQGTIQVFADVFKMLIKEIITIRHADKFLYNLAPYIVILASIMAFSCLPINKGMEVLDFNVGIFFLLAASSIGVVGILLAGWSSNNKYSLIGAMRSGAQMISYELSVGLSILTIVILTDTMQLSEIVERQADGWFLFKGHIPALIAFIIYLIAGNAEVNRGPFDLPEAESELTAGYHTEYSGMHFGLFYVAEFVNLFIIAAVATTIFLGGWMPLHIPGLDGFNAIMDYIPGFIWFFGKSFFVVWLLMWIKWTFPRLRIDQILTLEWKYLVPIGLCNLLLMVIIVVFKLHF
2837	GC_00000326		PV2SA01	3127	5	5	1	1	1	1	1	COG1005	NADH:ubiquinone oxidoreductase subunit 1 (chain H) (NuoH) (PDB:6HUM)	COG1005	NADH dehydrogenase	C	Energy production and conversion	MFDFSIVTQWVHSLLTSFMPEELAVLIECIVIGVCIMLAYAVIAIIMIFMERKVCAAFQCRLGPMRVGPQGTIQVFADVFKMLIKEIITIRHADKFLYNLAPYIVILASIMAFSCLPINKGMEVLDFNVGIFFLLAASSIGVVGILLAGWSSNNKYSLIGAMRSGAQMISYELSVGLSILTIVILTDTMQLSEIVERQADGWFLFKGHIPALIAFIIYLIAGNAEVNRGPFDLPEAESELTAGYHTEYSGMHFGLFYVAEFVNLFIIAAVATTIFLGGWMPLHIPGLDGFNAIMDYIPGFIWFFGKSFFVVWLLMWIKWTFPRLRIDQILTLEWKYLVPIGLCNLLLMVIIVVFKLHF
2838	GC_00000326		PV2SA02	3802	5	5	1	1	1	1	1	COG1005	NADH:ubiquinone oxidoreductase subunit 1 (chain H) (NuoH) (PDB:6HUM)	COG1005	NADH dehydrogenase	C	Energy production and conversion	MFDFSIVTQWVHSLLTSFMPEELAVLIECIVIGVCIMLAYAVIAIIMIFMERKVCAAFQCRLGPMRVGPQGTIQVFADVFKMLIKEIITIRHADKFLYNLAPYIVILASIMAFSCLPINKGMEVLDFNVGIFFLLAASSIGVVGILLAGWSSNNKYSLIGAMRSGAQMISYELSVGLSILTIVILTDTMQLSEIVERQADGWFLFKGHIPALIAFIIYLIAGNAEVNRGPFDLPEAESELTAGYHTEYSGMHFGLFYVAEFVNLFIIAAVATTIFLGGWMPLHIPGLDGFNAIMDYIPGFIWFFGKSFFVVWLLMWIKWTFPRLRIDQILTLEWKYLVPIGLCNLLLMVIIVVFKLHF
7874	GC_00001336		PV10SA01	3762	5	5	1	1	0.999202	1	0.999601	COG0839	NADH:ubiquinone oxidoreductase subunit 6 (chain J) (NuoJ) (PDB:4HE8)	COG0839	NADH dehydrogenase	C	Energy production and conversion	MTLQLIVFIVLALFIAVCSVLAVTTSRILRAATYLLFVLFGTAGIYFQLNYSFLGAVQLLIYAGGITVLYVFSILLTSSQGDKAERLKNGKMVAGAISTIAGLAICLFVMLKNEFLPSHFVHGELDVRTIGHALMGMEKYQYILPFEVISVLLLACIVGGILIARKR
7875	GC_00001336		PV26FA01	2388	5	5	1	1	0.999202	1	0.999601	COG0839	NADH:ubiquinone oxidoreductase subunit 6 (chain J) (NuoJ) (PDB:4HE8)	COG0839	NADH dehydrogenase	C	Energy production and conversion	MTLQLIVFIVLALFIAVCSVLAVTTSRILRAATYLLFVLFGTAGIYFQLNYSFLGAVQLLIYAGGITVLYVFSILLTSSQGDKAERLKNGKMVAGAISTIAGLAICLFVMLKNEFLPSHFVHGELDVRTIGHALIGMEKYQYILPFEVISVLLLACIVGGILIARKR
7876	GC_00001336		PV29FA01	4114	5	5	1	1	0.999202	1	0.999601	COG0839	NADH:ubiquinone oxidoreductase subunit 6 (chain J) (NuoJ) (PDB:4HE8)	COG0839	NADH dehydrogenase	C	Energy production and conversion	MTLQLIVFIVLALFIAVCSVLAVTTSRILRAATYLLFVLFGTAGIYFQLNYSFLGAVQLLIYAGGITVLYVFSILLTSSQGDKAERLKNGKMVAGAISTIAGLAICLFVMLKNEFLPSHFVHGELDVRTIGHALMGMEKYQYILPFEVISVLLLACIVGGILIARKR
7877	GC_00001336		PV2SA01	3129	5	5	1	1	0.999202	1	0.999601	COG0839	NADH:ubiquinone oxidoreductase subunit 6 (chain J) (NuoJ) (PDB:4HE8)	COG0839	NADH dehydrogenase	C	Energy production and conversion	MTLQLIVFIVLALFIAVCSVLAVTTSRILRAATYLLFVLFGTAGIYFQLNYSFLGAVQLLIYAGGITVLYVFSILLTSSQGDKAERLKNGKMVAGAISTIAGLAICLFVMLKNEFLPSHFVHGELDVRTIGHALMGMEKYQYILPFEVISVLLLACIVGGILIARKR
7878	GC_00001336		PV2SA02	3804	5	5	1	1	0.999202	1	0.999601	COG0839	NADH:ubiquinone oxidoreductase subunit 6 (chain J) (NuoJ) (PDB:4HE8)	COG0839	NADH dehydrogenase	C	Energy production and conversion	MTLQLIVFIVLALFIAVCSVLAVTTSRILRAATYLLFVLFGTAGIYFQLNYSFLGAVQLLIYAGGITVLYVFSILLTSSQGDKAERLKNGKMVAGAISTIAGLAICLFVMLKNEFLPSHFVHGELDVRTIGHALMGMEKYQYILPFEVISVLLLACIVGGILIARKR
11804	GC_00002122		PV10SA01	3757	5	5	1	1	0.994828	1	0.997407	COG0838	NADH:ubiquinone oxidoreductase subunit 3 (chain A) (NuoA) (PDB:3RKO)	COG0838	NADH dehydrogenase	C	Energy production and conversion	MYFTLLVVVILTAIALVAVALGIARAISPRSYNSQKGEAYECGIPTRGRSWMQFKVGYYLFAILFLMFDVETVFLFPWAVVVQDLGVYGLFSILFFLVILVLGLAYAWKKGALEWK
11805	GC_00002122		PV26FA01	2393	5	5	1	1	0.994828	1	0.997407	COG0838	NADH:ubiquinone oxidoreductase subunit 3 (chain A) (NuoA) (PDB:3RKO)	COG0838	NADH dehydrogenase	C	Energy production and conversion	MYFTLLVVVILTAIALVAVALGIARAISPRSYNSQKGEAYECGIPTRGRSWMQFKVGYYLFAILFLMFDVETVFLFPWAVVVQDLGVYGLFSILFFLVILVLGLAYAWKKGALEWK
11806	GC_00002122		PV29FA01	4119	5	5	1	1	0.994828	1	0.997407	COG0838	NADH:ubiquinone oxidoreductase subunit 3 (chain A) (NuoA) (PDB:3RKO)	COG0838	NADH dehydrogenase	C	Energy production and conversion	MYFTLLVVVILTAIALVAVALGIARAISPRSYNSQKGEAYECGIPTRGRSWMQFKVGYYLFAILFLMFDVETVFLFPWAVVVQDLGVYGLFSILFFLVILVLGLAYAWKKGALEWK
11807	GC_00002122		PV2SA01	3124	5	5	1	1	0.994828	1	0.997407	COG0838	NADH:ubiquinone oxidoreductase subunit 3 (chain A) (NuoA) (PDB:3RKO)	COG0838	NADH dehydrogenase	C	Energy production and conversion	MYFTLLVVVILTAIALVAVALGIARAISPRSYNSQKGEAYECGIPTRGRSWMQFKVGYYLFAILFLMLDVETVFLFPWAVVVQDLGVYGLFSILFFLVILVLGLAYAWKKGALEWK
11808	GC_00002122		PV2SA02	3799	5	5	1	1	0.994828	1	0.997407	COG0838	NADH:ubiquinone oxidoreductase subunit 3 (chain A) (NuoA) (PDB:3RKO)	COG0838	NADH dehydrogenase	C	Energy production and conversion	MYFTLLVVVILTAIALVAVALGIARAISPRSYNSQKGEAYECGIPTRGRSWMQFKVGYYLFAILFLMLDVETVFLFPWAVVVQDLGVYGLFSILFFLVILVLGLAYAWKKGALEWK
6674	GC_00001096		PV10SA01	3538	5	5	1	1	1	1	1	COG0778	Nitroreductase (NfnB) (PDB:1F5V)	COG0778	Pyrimidine degradation	C	Energy production and conversion	MNFLELVKARYSARKYANRPVEAEKLDYIMECVRFAPSAVNFQPWRFRIVTDEAVLKALYSCYKREWLATAPCIIVACVDHNESWHRRADNKDHADIDIAIAVEHLCLAAAEQGLGTCWVCNFDAPQCSEVLGLPENLEPAVLIPVGYAEDEPTEKKRKPLNEILL
6675	GC_00001096		PV26FA01	2628	5	5	1	1	1	1	1	COG0778	Nitroreductase (NfnB) (PDB:1F5V)	COG0778	Pyrimidine degradation	C	Energy production and conversion	MNFLELVKARYSARKYANRPVEAEKLDYIMECVRFAPSAVNFQPWRFRIVTDEAVLKALYSCYKREWLATAPCIIVACVDHNESWHRRADNKDHADIDIAIAVEHLCLAAAEQGLGTCWVCNFDAPQCSEVLGLPENLEPAVLIPVGYAEDEPTEKKRKPLNEILL
6676	GC_00001096		PV29FA01	4341	5	5	1	1	1	1	1	COG0778	Nitroreductase (NfnB) (PDB:1F5V)	COG0778	Pyrimidine degradation	C	Energy production and conversion	MNFLELVKARYSARKYANRPVEAEKLDYIMECVRFAPSAVNFQPWRFRIVTDEAVLKALYSCYKREWLATAPCIIVACVDHNESWHRRADNKDHADIDIAIAVEHLCLAAAEQGLGTCWVCNFDAPQCSEVLGLPENLEPAVLIPVGYAEDEPTEKKRKPLNEILL
6677	GC_00001096		PV2SA01	2917	5	5	1	1	1	1	1	COG0778	Nitroreductase (NfnB) (PDB:1F5V)	COG0778	Pyrimidine degradation	C	Energy production and conversion	MNFLELVKARYSARKYANRPVEAEKLDYIMECVRFAPSAVNFQPWRFRIVTDEAVLKALYSCYKREWLATAPCIIVACVDHNESWHRRADNKDHADIDIAIAVEHLCLAAAEQGLGTCWVCNFDAPQCSEVLGLPENLEPAVLIPVGYAEDEPTEKKRKPLNEILL
6678	GC_00001096		PV2SA02	3592	5	5	1	1	1	1	1	COG0778	Nitroreductase (NfnB) (PDB:1F5V)	COG0778	Pyrimidine degradation	C	Energy production and conversion	MNFLELVKARYSARKYANRPVEAEKLDYIMECVRFAPSAVNFQPWRFRIVTDEAVLKALYSCYKREWLATAPCIIVACVDHNESWHRRADNKDHADIDIAIAVEHLCLAAAEQGLGTCWVCNFDAPQCSEVLGLPENLEPAVLIPVGYAEDEPTEKKRKPLNEILL
6699	GC_00001101		PV10SA01	1305	5	5	1	1	1	1	1	COG0778	Nitroreductase (NfnB) (PDB:1F5V)	COG0778	Pyrimidine degradation	C	Energy production and conversion	MESINNRRTIRKYKQEDISASLLNDLLEKAFRASTMGNMQLYSVIVTRDKQMKERLAPAHFNQPMVTGAPVVLTFCADFNRFSKWCRERKAVPGYDNPISFLNAATDALLVTQNFCTLAEENGLGICFLGTTIYNPDQIIDILQLPELVMPVATITVGYPDECPPQVDRLPIEGILHEELYHDYTKEDIDRIYRYKESLPENHQFIKENHKETLAQVFTEVRYKKSDNECMSVTLKETLKKQGFEK
6700	GC_00001101		PV26FA01	716	5	5	1	1	1	1	1	COG0778	Nitroreductase (NfnB) (PDB:1F5V)	COG0778	Pyrimidine degradation	C	Energy production and conversion	MESINNRRTIRKYKQEDISASLLNDLLEKAFRASTMGNMQLYSVIVTRDKQMKERLAPAHFNQPMVTGAPVVLTFCADFNRFSKWCRERKAVPGYDNPISFLNAATDALLVTQNFCTLAEENGLGICFLGTTIYNPDQIIDILQLPELVMPVATITVGYPDECPPQVDRLPIEGILHEELYHDYTKEDIDRIYRYKESLPENHQFIKENHKETLAQVFTEVRYKKSDNECMSVTLKETLKKQGFEK
6701	GC_00001101		PV29FA01	2352	5	5	1	1	1	1	1	COG0778	Nitroreductase (NfnB) (PDB:1F5V)	COG0778	Pyrimidine degradation	C	Energy production and conversion	MESINNRRTIRKYKQEDISASLLNDLLEKAFRASTMGNMQLYSVIVTRDKQMKERLAPAHFNQPMVTGAPVVLTFCADFNRFSKWCRERKAVPGYDNPISFLNAATDALLVTQNFCTLAEENGLGICFLGTTIYNPDQIIDILQLPELVMPVATITVGYPDECPPQVDRLPIEGILHEELYHDYTKEDIDRIYRYKESLPENHQFIKENHKETLAQVFTEVRYKKSDNECMSVTLKETLKKQGFEK
6702	GC_00001101		PV2SA01	633	5	5	1	1	1	1	1	COG0778	Nitroreductase (NfnB) (PDB:1F5V)	COG0778	Pyrimidine degradation	C	Energy production and conversion	MESINNRRTIRKYKQEDISASLLNDLLEKAFRASTMGNMQLYSVIVTRDKQMKERLAPAHFNQPMVTGAPVVLTFCADFNRFSKWCRERKAVPGYDNPISFLNAATDALLVTQNFCTLAEENGLGICFLGTTIYNPDQIIDILQLPELVMPVATITVGYPDECPPQVDRLPIEGILHEELYHDYTKEDIDRIYRYKESLPENHQFIKENHKETLAQVFTEVRYKKSDNECMSVTLKETLKKQGFEK
6703	GC_00001101		PV2SA02	1308	5	5	1	1	1	1	1	COG0778	Nitroreductase (NfnB) (PDB:1F5V)	COG0778	Pyrimidine degradation	C	Energy production and conversion	MESINNRRTIRKYKQEDISASLLNDLLEKAFRASTMGNMQLYSVIVTRDKQMKERLAPAHFNQPMVTGAPVVLTFCADFNRFSKWCRERKAVPGYDNPISFLNAATDALLVTQNFCTLAEENGLGICFLGTTIYNPDQIIDILQLPELVMPVATITVGYPDECPPQVDRLPIEGILHEELYHDYTKEDIDRIYRYKESLPENHQFIKENHKETLAQVFTEVRYKKSDNECMSVTLKETLKKQGFEK
8844	GC_00001530		PV10SA01	234	5	5	1	1	0.999365	1	0.999682	COG0778	Nitroreductase (NfnB) (PDB:1F5V)	COG0778	Pyrimidine degradation	C	Energy production and conversion	MLVGAGMFVLCSCTSQGSQQKEVVTDSVSVSQVDPVIETIMSRRSIRKYKPKAVEREKMQTIVECGINAPNGMNKQSWEVRVVDNPEFINGLTEIFKKENPKAAERPGFQNMFNNAPTVVFIANDPAYDMSQIDCGLLGENMILSAWSMGIGSCCLGGPVRFMKSPAAAEYMKQLGFSEGYELLYAIAFGYPDEMPAAKPREVSKVKFVD
8845	GC_00001530		PV26FA01	1723	5	5	1	1	0.999365	1	0.999682	COG0778	Nitroreductase (NfnB) (PDB:1F5V)	COG0778	Pyrimidine degradation	C	Energy production and conversion	MLVGAGMFVLCSCTSQGSQQKEVVTDSVSVSQVDPVIETIMSRRSIRKYKPKAVEREKMQTIVECGINAPNGMNKQSWEVRVVDNPEFINGLTEIFKKENPKAAERPGFQNMFNNAPTVVFIANDPAYDMSQIDCGLLGENMILSAWSMGIGSCCLGGPVRFMKSPAAAEYMKQLGFSEGYELLYAIAFGYPDEMPAAKPREVSKVKFVD
8846	GC_00001530		PV29FA01	3835	5	5	1	1	0.999365	1	0.999682	COG0778	Nitroreductase (NfnB) (PDB:1F5V)	COG0778	Pyrimidine degradation	C	Energy production and conversion	MLVGAGMFVLCSCTSQGSQQKEVVTDSVSVSQVDPVIETIMSRRSIRKYKPKAVEHEKMQTIVECGINAPNGMNKQSWEVRVVDNPEFINGLTEIFKKENPKAAERPGFQNMFNNAPTVVFIANDPAYDMSQIDCGLLGENMILSAWSMGIGSCCLGGPVRFMKSPAAAEYMKQLGFSEGYELLYAIAFGYPDEMPAAKPREVSKVKFVD
8847	GC_00001530		PV2SA01	3839	5	5	1	1	0.999365	1	0.999682	COG0778	Nitroreductase (NfnB) (PDB:1F5V)	COG0778	Pyrimidine degradation	C	Energy production and conversion	MLVGAGMFVLCSCTSQGSQQKEVVTDSVSVSQVDPVIETIMSRRSIRKYKPKAVEREKMQTIVECGINAPNGMNKQSWEVRVVDNPEFINGLTEIFKKENPKAAERPGFQNMFNNAPTVVFIANDPAYDMSQIDCGLLGENMILSAWSMGIGSCCLGGPVRFMKSPAAAEYMKQLGFSEGYELLYAIAFGYPDEMPAAKPREVSKVKFVD
8848	GC_00001530		PV2SA02	328	5	5	1	1	0.999365	1	0.999682	COG0778	Nitroreductase (NfnB) (PDB:1F5V)	COG0778	Pyrimidine degradation	C	Energy production and conversion	MLVGAGMFVLCSCTSQGSQQKEVVTDSVSVSQVDPVIETIMSRRSIRKYKPKAVEREKMQTIVECGINAPNGMNKQSWEVRVVDNPEFINGLTEIFKKENPKAAERPGFQNMFNNAPTVVFIANDPAYDMSQIDCGLLGENMILSAWSMGIGSCCLGGPVRFMKSPAAAEYMKQLGFSEGYELLYAIAFGYPDEMPAAKPREVSKVKFVD
10289	GC_00001819		PV10SA01	3118	5	5	1	1	0.997004	1	0.9985	COG0778	Nitroreductase (NfnB) (PDB:1F5V)	COG0778	Pyrimidine degradation	C	Energy production and conversion	MEQFSDLIKNRRSMRKFTDQELTQEEVVALLKAALMAPSSKRSNCWQFIVVDDKDMLEKLSHCKEMGAAFLADAAMAVVVMADPLASDVWIEDASIASIMIQLQAEDLGLGSCWIQVRERFTATGMPSGEYVHTLLDIPLQLQVVSIIAVGHKGMERKPFNEEHLQWEKIHINKYGGK
10290	GC_00001819		PV26FA01	3127	5	5	1	1	0.997004	1	0.9985	COG0778	Nitroreductase (NfnB) (PDB:1F5V)	COG0778	Pyrimidine degradation	C	Energy production and conversion	MEQFSDLIKNRRSMRKFTDQELTQEEVIALLKAALMAPSSKRSNCWQFIVVDDKDMLEKLSHCKEMGAAFLADAAMAVVVMADPLASDVWIEDASIASIMIQLQAEDLGLGSCWIQVRERFTATGMPSGEYVHTLLDIPLQLQVVSIIAVGHKGMERKPFNEEHLQWEKIHINKYGGK
10291	GC_00001819		PV29FA01	315	5	5	1	1	0.997004	1	0.9985	COG0778	Nitroreductase (NfnB) (PDB:1F5V)	COG0778	Pyrimidine degradation	C	Energy production and conversion	MEQFSDLIKNRRSMRKFTDQELTQEEVVALLKAALMAPSSKRSNCWQFIVVDDKDMLEKLSHCKEMGAAFLADAAMAVVVMADPLASDVWIEDASIASIMIQLQAEDLGLGSCWIQVRERFTATGMPSGEYVHTLLDIPLQLQVVSIIAVGHKSMERKPFNEEHLQWEKIHINKYGGK
10292	GC_00001819		PV2SA01	2286	5	5	1	1	0.997004	1	0.9985	COG0778	Nitroreductase (NfnB) (PDB:1F5V)	COG0778	Pyrimidine degradation	C	Energy production and conversion	MEQFSDLIKNRRSMRKFTDQELTQEEVVALLKAALMAPSSKRSNCWQFIVVDDKDMLEKLSHCKEMGAAFLADAAMAVVVMADPLASDVWIEDASIASIMIQLQAEDLGLGSCWIQVRERFTATGMPSGEYVHTLLDIPLQLQVVSIIAVGHKGMERKPFNEEHLQWEKIHINKYGGK
10293	GC_00001819		PV2SA02	2961	5	5	1	1	0.997004	1	0.9985	COG0778	Nitroreductase (NfnB) (PDB:1F5V)	COG0778	Pyrimidine degradation	C	Energy production and conversion	MEQFSDLIKNRRSMRKFTDQELTQEEVVALLKAALMAPSSKRSNCWQFIVVDDKDMLEKLSHCKEMGAAFLADAAMAVVVMADPLASDVWIEDASIASIMIQLQAEDLGLGSCWIQVRERFTATGMPSGEYVHTLLDIPLQLQVVSIIAVGHKGMERKPFNEEHLQWEKIHINKYGGK
13114	GC_00002384		PV10SA01	3477	5	5	1	1	0.994215	1	0.997099	COG0778	Nitroreductase (NfnB) (PDB:1F5V)	COG0778	Pyrimidine degradation	C	Energy production and conversion	MNLEEVLNFRRSVRRYDKNKPIDSEKVKHCLGLATLAPNSSNMQLWEFYQITNPGLMAKVSEACLGQSAASTASEIVVFVTRQDLYKKRAKFVLDFEEGNIRRNSPKERQEKRIRDRKLYYGKLMPFIYARFFGLLGLFRVILARTISLFRPMMLEVSECDMRVTVNKSCALAAQTFMIAMANEGYDTCPLEGFDSRRMKKLLKLPHGAGINMVIPCGIRDGNKGIWGERGRVPFDEIYHRI
13115	GC_00002384		PV26FA01	2695	5	5	1	1	0.994215	1	0.997099	COG0778	Nitroreductase (NfnB) (PDB:1F5V)	COG0778	Pyrimidine degradation	C	Energy production and conversion	MNLEEVLNFRRSVRRYDKNKPIDPEKVKHCLELATLAPNSSNMQLWEFYQITNPGLMAKVSEACLGQSAASTASEIVVFVTRQDLYKKRAKFVLDFEEGNIRRNSPKERQEKRIRDRKLYYGKLMPFIYARFFGLLGLFRVILARTISLFRPMMLEVSECDMRVTVNKSCALAAQTFMIAMANEGYDTCPLEGFDSRRMKKLLKLPHGAGINMVIPCGIRDGNKGIWGERGRVPFDEIYHRI
13116	GC_00002384		PV29FA01	4449	5	5	1	1	0.994215	1	0.997099	COG0778	Nitroreductase (NfnB) (PDB:1F5V)	COG0778	Pyrimidine degradation	C	Energy production and conversion	MNLEEVLNFRRSVRRYDKNKPIDPEKVKHCLELATLAPNSSNMQLWEFYQITNPGLMAKVSEACLGQSAASTASEIVVFVTRQDLYKKRAKFVLDFEEGNIRRNSPKERQEKRIRDRKLYYGKLMPFIYARFFGLLGLFRVILARTISLFRPMMLEVSECDMRVTVNKSCALAAQTFMIAMANEGYDTCPLEGFDSRRMKKLLKLPHGAGINMVIPCGIRDGNKGIWGERGRVPFDEIYHRI
13117	GC_00002384		PV2SA01	2729	5	5	1	1	0.994215	1	0.997099	COG0778	Nitroreductase (NfnB) (PDB:1F5V)	COG0778	Pyrimidine degradation	C	Energy production and conversion	MNLEEVLNFRRSVRRYDKNKPIDPEKVKHCLELATLAPNSSNMQLWEFYQITNPRLMAKVSEACLGQSAASTASEIVVFVTRQDLYKKRAKFVLDFEEGNIRRNSPKERQEKRIRDRKLYYGKLMPFIYARFFGLLGLFRVILARTISLFRPMMLEVSECDMRVTVNKSCALAAQTFMIAMANEGYDTCPLEGFDSRRMKKLLKLPHGAGINMVIPCGIRDGNKGIWGERGRVPFDEIYHRI
13118	GC_00002384		PV2SA02	3405	5	5	1	1	0.994215	1	0.997099	COG0778	Nitroreductase (NfnB) (PDB:1F5V)	COG0778	Pyrimidine degradation	C	Energy production and conversion	MNLEEVLNFRRSVRRYDKNKPIDPEKVKHCLELATLAPNSSNMQLWEFYQITNPRLMAKVSEACLGQSAASTASEIVVFVTRQDLYKKRAKFVLDFEEGNIRRNSPKERQEKRIRDRKLYYGKLMPFIYARFFGLLGLFRVILARTISLFRPMMLEVSECDMRVTVNKSCALAAQTFMIAMANEGYDTCPLEGFDSRRMKKLLKLPHGAGINMVIPCGIRDGNKGIWGERGRVPFDEIYHRI
14744	GC_00002711		PV10SA01	3082	5	5	1	1	0.995215	1	0.997602	COG0778	Nitroreductase (NfnB) (PDB:1F5V)	COG0778	Pyrimidine degradation	C	Energy production and conversion	MNAATIFKTLTTVTLSITLLITGGCNNMEAKKEETGKNTAIENIFARKSVRTYTPQPIEKEKVDLLVKAAMAAPTAVNKQPWAFVVVDDRKVLDKLAAELPYAKMTAQAPLAIVVCGDLSKALNGETDRYWMLDCSAASENLLLAAESMGLGAVWTAVYPENDRIAKVRSVLSLPDHIIPFNLIPVGYPQHREEAKDKFKTENIHYNKW
14745	GC_00002711		PV26FA01	3183	5	5	1	1	0.995215	1	0.997602	COG0778	Nitroreductase (NfnB) (PDB:1F5V)	COG0778	Pyrimidine degradation	C	Energy production and conversion	MNAATIFKTLTTVTLSITLLITGGCNNMEAKKEETGKNTAIENIFARKSVRTYTPQPIEKEKVDLLVKAAMAAPTAVNKQPWAFVVVDDRKVLDKLAAELPYAKMTAQAPLAIVVCGDLSKALNGETDRYWMLDCSAASENLLLAAESMGLGAVWTAVYPENDRIAKVRSVLSLPDHIIPFNLIPVGYPQHREEAKDKFKTENIHYNKW
14746	GC_00002711		PV29FA01	382	5	5	1	1	0.995215	1	0.997602	COG0778	Nitroreductase (NfnB) (PDB:1F5V)	COG0778	Pyrimidine degradation	C	Energy production and conversion	MTAATIFKTLTTVTLSITLLITGGCNNMEAKKEETGKNTAIENIFARKSVRTYTPQPIEKEKVDLLVKAAMAAPTAVNKQPWAFVVVDDRKVLDKLAAELPYAKMTAQAPLAIVVCGDLSKALNGETDRYWMLDCSAASENLLLAAESMGLGAVWTAVYPENDRIAKVRSVLSLPDHIIPFNLIPVGYPQHREEAKDKFKTENIHYNKW
14747	GC_00002711		PV2SA01	2233	5	5	1	1	0.995215	1	0.997602	COG0778	Nitroreductase (NfnB) (PDB:1F5V)	COG0778	Pyrimidine degradation	C	Energy production and conversion	MNAATIFKTLTTVTLSITLLITGGCNNMEAKKEETGKNTAIENIFARKSVRTYTPQPIEKEKVDLLVKAAMAAPTAVNKQPWAFVVVDDRKVLDELAAELPYAKMTAQAPLAIVVCGDLSKALNGETDRYWMLDCSAASENLLLAAESMGLGAVWTAVYPENDRIAKVRSVLSLPDHIIPFNLIPVGYPQHREEAKDKFKTENIHYNKW
14748	GC_00002711		PV2SA02	2908	5	5	1	1	0.995215	1	0.997602	COG0778	Nitroreductase (NfnB) (PDB:1F5V)	COG0778	Pyrimidine degradation	C	Energy production and conversion	MNAATIFKTLTTVTLSITLLITGGCNNMEAKKEETGKNTAIENIFARKSVRTYTPQPIEKEKVDLLVKAAMAAPTAVNKQPWAFVVVDDRKVLDELAAELPYAKMTAQAPLAIVVCGDLSKALNGETDRYWMLDCSAASENLLLAAESMGLGAVWTAVYPENDRIAKVRSVLSLPDHIIPFNLIPVGYPQHREEAKDKFKTENIHYNKW
16900	GC_00003200		PV10SA01	2796	4	4	1	0	0.988208	1	0.994069	COG0778	Nitroreductase (NfnB) (PDB:1F5V)	COG0778	Pyrimidine degradation	C	Energy production and conversion	MKKVILSVLLLGIIMGLQAQELKVINLNKPDKSRNVTLMQALDKRHSERAFANKQLTHQDLSDLLWAANGINRPSEGKRTAPSANNVQEVDIYVCMKDGCYLYDAKAHQLQPVAKGDYRSAVAGQQDFVTEAPVCLILVADLSRFNSGNPEQLLIVGACDTGIISQNISLFCSSAGLVTVPRMTMDKNTLGKILKLKKSQYLLLNHPVGYAK
16901	GC_00003200		PV29FA01	565	4	4	1	0	0.988208	1	0.994069	COG0778	Nitroreductase (NfnB) (PDB:1F5V)	COG0778	Pyrimidine degradation	C	Energy production and conversion	MKKVILSVLLLSIIMGLQAQELKVINLNKPDKSRNVTLMQALDKRHSERAFANKQLTHQDLSDLLWAANGINRPSEGKRTAPSANNVQEVDIYVCMKDGCYLYDAKAHQLQPVAKGDYRSAVAGQQDFVTEAPGCLILVADLSRFNSGNPEQLLIVGACDTGIISQNISLFCSSAGLVTVPRMTMDKNTLGKILKLKKSQHLLLNHPVGYAK
16902	GC_00003200		PV2SA01	1080	4	4	1	0	0.988208	1	0.994069	COG0778	Nitroreductase (NfnB) (PDB:1F5V)	COG0778	Pyrimidine degradation	C	Energy production and conversion	MKKVILSVLLLGIIMGLQAQELKVINLNKPDKSRNVTLMQALDKRHSERTFANKQLTHQDLSDLLWAANGINRSSEGKRTAPSANNVQEVDIYVCMKDGCYLYDAKAHQLQPVAKGDYRSAVAGQQDFVTEAPVCLILVADLSRFNSGNPEQLLIVGACDTGIISQNISLFCSSAGLVTVPRMTMDKNTLGKILKLKKSQYLLLNHPVGYAK
16903	GC_00003200		PV2SA02	1755	4	4	1	0	0.988208	1	0.994069	COG0778	Nitroreductase (NfnB) (PDB:1F5V)	COG0778	Pyrimidine degradation	C	Energy production and conversion	MKKVILSVLLLGIIMGLQAQELKVINLNKPDKSRNVTLMQALDKRHSERTFANKQLTHQDLSDLLWAANGINRSSEGKRTAPSANNVQEVDIYVCMKDGCYLYDAKAHQLQPVAKGDYRSAVAGQQDFVTEAPVCLILVADLSRFNSGNPEQLLIVGACDTGIISQNISLFCSSAGLVTVPRMTMDKNTLGKILKLKKSQYLLLNHPVGYAK
19326	GC_00004156	PV02	PV2SA01	747	2	2	1	0	1	1	1	COG0716	Flavodoxin (FldA) (PDB:1AG9)	COG0716	Heme biosynthesis	C	Energy production and conversion	MKLKCLLAMLLLTFLSCSNTPAVEDKIDSLPHSEPGKTLIVYFSWSGHTQTVANIIHELIGCDMVEIEPEEPYSDEYNEVVDRFKNERDNHILPALRTKVENMDDYDTLIIGSPIWGGLLSSPVKSFLSGYDLSGKKILPFCTHGGSGTAQSVDNIRKLCPHAEILLFMAVKLQTLGMK
19327	GC_00004156	PV02	PV2SA02	1422	2	2	1	0	1	1	1	COG0716	Flavodoxin (FldA) (PDB:1AG9)	COG0716	Heme biosynthesis	C	Energy production and conversion	MKLKCLLAMLLLTFLSCSNTPAVEDKIDSLPHSEPGKTLIVYFSWSGHTQTVANIIHELIGCDMVEIEPEEPYSDEYNEVVDRFKNERDNHILPALRTKVENMDDYDTLIIGSPIWGGLLSSPVKSFLSGYDLSGKKILPFCTHGGSGTAQSVDNIRKLCPHAEILLFMAVKLQTLGMK
9734	GC_00001708		PV10SA01	2393	5	5	1	1	0.993258	1	0.996618	COG0716	Flavodoxin (FldA) (PDB:1AG9)	COG0716	Heme biosynthesis	C	Energy production and conversion	MKRLGLFMTVIMILCITVNAQKQSNRTLVAYFSATGTTEKAAKQIAEVTGGALYEIQPAKKYTSTDLDWHDKSSRSSVEMADASSRPALRSQPQNLAAYDTIYIGFPIWWNLAPRIINSFIEKGDFTGKILIPFATSGGSRISNAEQELKKAYPSLNWQKGRLMNGATKEEIKQWTKK
9735	GC_00001708		PV26FA01	3704	5	5	1	1	0.993258	1	0.996618	COG0716	Flavodoxin (FldA) (PDB:1AG9)	COG0716	Heme biosynthesis	C	Energy production and conversion	MKRLGLFMTVIMILCITVNAQKQSNRTLVAYFSATGTTEKAAKQIAEVTGGALYEIQPAKKYTSADLDWHDKSSRSSVEMADASSRPALRSQPQNLAAYDTIYIGFPIWWNLAPRIINSFIEKGDFTGKILIPFATSGGSRISNAEQELKKAYPSLNWQKGRLMNGATKEEIKQWTKK
9736	GC_00001708		PV29FA01	1123	5	5	1	1	0.993258	1	0.996618	COG0716	Flavodoxin (FldA) (PDB:1AG9)	COG0716	Heme biosynthesis	C	Energy production and conversion	MKRLGLFMTVIMILCITVNAQKQSNRTLVAYFSATGTTEKAAKQIAEVTGGALYEIQPAKKYTSADLDWHDKSSRNSVEMADASSRPALRSQPQNLAAYDTIYIGFPIWWNLAPRIINSFIEKGDFTGNILIPFATSGGSRISNAEQELKKAYPSLNWQKGRLMNGATKEEIKQWTKK
9737	GC_00001708		PV2SA01	1405	5	5	1	1	0.993258	1	0.996618	COG0716	Flavodoxin (FldA) (PDB:1AG9)	COG0716	Heme biosynthesis	C	Energy production and conversion	MKRLGLFMTVIMILCITVNAQKQSNRTLVAYFSATGTTEKAAKQIAEVTGGALYEIQPAKKYTSADLDWHDKSSRSSVEMADASSRPALRSQPQNLAAYDTIYIGFPIWWNLAPRIINSFIEKGDFTGKILIPFATSGGSRISNAEQELKKAYPSLNWQKGRLMNGATKEEIKQWTKK
9738	GC_00001708		PV2SA02	2080	5	5	1	1	0.993258	1	0.996618	COG0716	Flavodoxin (FldA) (PDB:1AG9)	COG0716	Heme biosynthesis	C	Energy production and conversion	MKRLGLFMTVIMILCITVNAQKQSNRTLVAYFSATGTTEKAAKQIAEVTGGALYEIQPAKKYTSADLDWHDKSSRSSVEMADASSRPALRSQPQNLAAYDTIYIGFPIWWNLAPRIINSFIEKGDFTGKILIPFATSGGSRISNAEQELKKAYPSLNWQKGRLMNGATKEEIKQWTKK
14019	GC_00002565		PV10SA01	2194	5	5	1	1	0.981238	1	0.99053	COG0716	Flavodoxin (FldA) (PDB:1AG9)	COG0716	Heme biosynthesis	C	Energy production and conversion	MKKMGIIYGSSTGTCESIAQTIAEKLGVASVDVIDASKITTEKVESYDILLLGTSTWGDGELQDDWYDAIKMIKTADLNGKIVALFGCGDSESYCDTFCDGMGVIYDQLKNSGCTFVGAVSADGYSYSSSIAIIDGKFVGLALDDVNESGKTEERINSWVEEIKKNL
14020	GC_00002565		PV26FA01	3793	5	5	1	1	0.981238	1	0.99053	COG0716	Flavodoxin (FldA) (PDB:1AG9)	COG0716	Heme biosynthesis	C	Energy production and conversion	MKKMGIIYGSSTGTCESIAQTIAEKLGVASVDVIDASKITTEKVGGYDILLLGTSTWGDGELQDDWYDAIKTVKTADLNGKIVALFGCGDSESYCDTFCDGMGVIYDQLKNSGCTFVGAVPADEYSYSSSIAVIDGKFVGLALDDVNESGKTEERINNWIEEIKKNL
14021	GC_00002565		PV29FA01	1198	5	5	1	1	0.981238	1	0.99053	COG0716	Flavodoxin (FldA) (PDB:1AG9)	COG0716	Heme biosynthesis	C	Energy production and conversion	MKKMGIIYGSSTGTCESIAQTIAEKLGVASVDVIDASKITTEKVESYDILLLGTSTWGEGELQDDWYDAIKMIKTADLNGKIVALFGCGDSESYCDTFCDGMGVIYDQLKNSGCTFVGAVSADGYSYSSSIAIIDGKFVGLALDDVNESGKTEERINSWVEEIKKNL
14022	GC_00002565		PV2SA01	1707	5	5	1	1	0.981238	1	0.99053	COG0716	Flavodoxin (FldA) (PDB:1AG9)	COG0716	Heme biosynthesis	C	Energy production and conversion	MKKMGIIYGSSTGTCESIAQTIAEKLGVASVDVIDASKITTEKVESYDILLLGTSTWGDGELQDDWYDAIKTIKTADLNGKIVALFGCGDSESYCDTFCDGMGVIYDQLKNSGCTFVGAVSADGYSYSSSIAIIDGKFVGLALDDVNESGKTEERINSWVEEIKKNL
14023	GC_00002565		PV2SA02	2382	5	5	1	1	0.981238	1	0.99053	COG0716	Flavodoxin (FldA) (PDB:1AG9)	COG0716	Heme biosynthesis	C	Energy production and conversion	MKKMGIIYGSSTGTCESIAQTIAEKLGVASVDVIDASKITTEKVESYDILLLGTSTWGDGELQDDWYDAIKTIKTADLNGKIVALFGCGDSESYCDTFCDGMGVIYDQLKNSGCTFVGAVSADGYSYSSSIAIIDGKFVGLALDDVNESGKTEERINSWVEEIKKNL
5169	GC_00000793		PV10SA01	3763	5	5	1	1	1	1	1	COG0713	NADH:ubiquinone oxidoreductase subunit 11 or 4L (chain K) (NuoK) (PDB:4HE8)	COG0713	NADH dehydrogenase	C	Energy production and conversion	MVHMEYYLVVSTFMMFAGIYGFFTRRNLLAMLISVELILNSVDINFAVFNRYLFPEELEGFFFALFAIGVSAAETAVAIAIIINIYRNVRNIQVKNLNEMKN
5170	GC_00000793		PV26FA01	2387	5	5	1	1	1	1	1	COG0713	NADH:ubiquinone oxidoreductase subunit 11 or 4L (chain K) (NuoK) (PDB:4HE8)	COG0713	NADH dehydrogenase	C	Energy production and conversion	MVHMEYYLVVSTFMMFAGIYGFFTRRNLLAMLISVELILNSVDINFAVFNRYLFPEELEGFFFALFAIGVSAAETAVAIAIIINIYRNVRNIQVKNLNEMKN
5171	GC_00000793		PV29FA01	4113	5	5	1	1	1	1	1	COG0713	NADH:ubiquinone oxidoreductase subunit 11 or 4L (chain K) (NuoK) (PDB:4HE8)	COG0713	NADH dehydrogenase	C	Energy production and conversion	MVHMEYYLVVSTFMMFAGIYGFFTRRNLLAMLISVELILNSVDINFAVFNRYLFPEELEGFFFALFAIGVSAAETAVAIAIIINIYRNVRNIQVKNLNEMKN
5172	GC_00000793		PV2SA01	3130	5	5	1	1	1	1	1	COG0713	NADH:ubiquinone oxidoreductase subunit 11 or 4L (chain K) (NuoK) (PDB:4HE8)	COG0713	NADH dehydrogenase	C	Energy production and conversion	MVHMEYYLVVSTFMMFAGIYGFFTRRNLLAMLISVELILNSVDINFAVFNRYLFPEELEGFFFALFAIGVSAAETAVAIAIIINIYRNVRNIQVKNLNEMKN
5173	GC_00000793		PV2SA02	3805	5	5	1	1	1	1	1	COG0713	NADH:ubiquinone oxidoreductase subunit 11 or 4L (chain K) (NuoK) (PDB:4HE8)	COG0713	NADH dehydrogenase	C	Energy production and conversion	MVHMEYYLVVSTFMMFAGIYGFFTRRNLLAMLISVELILNSVDINFAVFNRYLFPEELEGFFFALFAIGVSAAETAVAIAIIINIYRNVRNIQVKNLNEMKN
9339	GC_00001629		PV10SA01	2559	5	5	1	1	0.993514	1	0.996746	COG0712	FoF1-type ATP synthase, delta subunit (AtpH) (PDB:1ABV)	COG0712	FoF1-type ATP synthase	C	Energy production and conversion	MYIGVISMRYAKALLAYADEKGTEDTVYEEAGILADSFSRIPELRQALDNPVLPAETKLKLICEAAGGGKVSEELKRFVELVLEERREKFLQFMIMSYIDLYRKQKNISVGKITTVCPVAEEVVNRIRALVVEKTHGTVEFKTKIDPKLEGGFIFEIGTYRLDASVANQIKRVKQQFIAKNRRIV
9340	GC_00001629		PV26FA01	3610	5	5	1	1	0.993514	1	0.996746	COG0712	FoF1-type ATP synthase, delta subunit (AtpH) (PDB:1ABV)	COG0712	FoF1-type ATP synthase	C	Energy production and conversion	MYIGVISMRYAKALLAYADEKGTEDTVYEEAGILADSFSRIPELRQALDNPVLPAETKLKLICEAAGGGQVSEELKRFVELVLEERREKFLQFMIMSYIDLYRKQKNISVGKITTVCPVAEEVVSRIRALVVEKTHGTVEFKTKIDPKLEGGFIFEIGTYRLDASVANQIKRVKQQFIAKNRRIV
9341	GC_00001629		PV29FA01	1035	5	5	1	1	0.993514	1	0.996746	COG0712	FoF1-type ATP synthase, delta subunit (AtpH) (PDB:1ABV)	COG0712	FoF1-type ATP synthase	C	Energy production and conversion	MYIGVISMRYAKALLAYADEKGTEDIVYEEAGILADSFSRIPELRQALDNPVLPAETKLKLICEAAGGGKVSEELKRFVELVLEERREKFLQFMIMSYIDLYRKQKNISVGKITTVCPVAEEVVNRIRALVVEKTHGTVEFKTKIDPKLEGGFIFEIGTYRLDASVANQIKRVKQQFIAKNRRIV
9342	GC_00001629		PV2SA01	1312	5	5	1	1	0.993514	1	0.996746	COG0712	FoF1-type ATP synthase, delta subunit (AtpH) (PDB:1ABV)	COG0712	FoF1-type ATP synthase	C	Energy production and conversion	MYIGVISMRYAKALLAYADEKGTEDTVYEEAGILADSFSRIPELRQALDNPVLPAETKLKLICEAAGGGKVSEELKRFVELVLEERREKFLQFMIMSYIDLYRKQKNISVGKITTVCPVAEEVVNRIRALVVEKTHGTVEFKTKIDPKLEGGFIFEIGTYRLDASVANQIKRVKQQFIAKNRRIV
9343	GC_00001629		PV2SA02	1987	5	5	1	1	0.993514	1	0.996746	COG0712	FoF1-type ATP synthase, delta subunit (AtpH) (PDB:1ABV)	COG0712	FoF1-type ATP synthase	C	Energy production and conversion	MYIGVISMRYAKALLAYADEKGTEDTVYEEAGILADSFSRIPELRQALDNPVLPAETKLKLICEAAGGGKVSEELKRFVELVLEERREKFLQFMIMSYIDLYRKQKNISVGKITTVCPVAEEVVNRIRALVVEKTHGTVEFKTKIDPKLEGGFIFEIGTYRLDASVANQIKRVKQQFIAKNRRIV
6404	GC_00001041		PV10SA01	2560	5	5	1	1	1	1	1	COG0711	FoF1-type ATP synthase, membrane subunit b or b' (AtpF) (PDB:1B9U)	COG0711	FoF1-type ATP synthase	C	Energy production and conversion	MSLLTPDSGLLFWMVIVFGIVFVILAKYGFPVITRMVDERKQYIDKSLLAAREANEQLANIKADSEMILAKAHEEQARILNEAVATRERILKEAKTQAQVEGQKLLDEAKKQIQAEKDSAISDIRRQVAVLSVDIAEKVLRKNLDDEKEQMEMIDRLLDELTVSKD
6405	GC_00001041		PV26FA01	3609	5	5	1	1	1	1	1	COG0711	FoF1-type ATP synthase, membrane subunit b or b' (AtpF) (PDB:1B9U)	COG0711	FoF1-type ATP synthase	C	Energy production and conversion	MSLLTPDSGLLFWMVIVFGIVFVILAKYGFPVITRMVDERKQYIDKSLLAAREANEQLANIKADSEMILAKAHEEQARILNEAVATRERILKEAKTQAQVEGQKLLDEAKKQIQAEKDSAISDIRRQVAVLSVDIAEKVLRKNLDDEKEQMEMIDRLLDELTVSKD
6406	GC_00001041		PV29FA01	1034	5	5	1	1	1	1	1	COG0711	FoF1-type ATP synthase, membrane subunit b or b' (AtpF) (PDB:1B9U)	COG0711	FoF1-type ATP synthase	C	Energy production and conversion	MSLLTPDSGLLFWMVIVFGIVFVILAKYGFPVITRMVDERKQYIDKSLLAAREANEQLANIKADSEMILAKAHEEQARILNEAVATRERILKEAKTQAQVEGQKLLDEAKKQIQAEKDSAISDIRRQVAVLSVDIAEKVLRKNLDDEKEQMEMIDRLLDELTVSKD
6407	GC_00001041		PV2SA01	1311	5	5	1	1	1	1	1	COG0711	FoF1-type ATP synthase, membrane subunit b or b' (AtpF) (PDB:1B9U)	COG0711	FoF1-type ATP synthase	C	Energy production and conversion	MSLLTPDSGLLFWMVIVFGIVFVILAKYGFPVITRMVDERKQYIDKSLLAAREANEQLANIKADSEMILAKAHEEQARILNEAVATRERILKEAKTQAQVEGQKLLDEAKKQIQAEKDSAISDIRRQVAVLSVDIAEKVLRKNLDDEKEQMEMIDRLLDELTVSKD
6408	GC_00001041		PV2SA02	1986	5	5	1	1	1	1	1	COG0711	FoF1-type ATP synthase, membrane subunit b or b' (AtpF) (PDB:1B9U)	COG0711	FoF1-type ATP synthase	C	Energy production and conversion	MSLLTPDSGLLFWMVIVFGIVFVILAKYGFPVITRMVDERKQYIDKSLLAAREANEQLANIKADSEMILAKAHEEQARILNEAVATRERILKEAKTQAQVEGQKLLDEAKKQIQAEKDSAISDIRRQVAVLSVDIAEKVLRKNLDDEKEQMEMIDRLLDELTVSKD
8719	GC_00001505		PV10SA01	3292	5	5	1	1	0.99963	1	0.999815	COG0674	Pyruvate:ferredoxin oxidoreductase or related 2-oxoacid:ferredoxin oxidoreductase, alpha subunit (PorA) (PDB:5C4I)	COG0674	Pyruvate oxidation	C	Energy production and conversion	MAEEVVLMKGNEAIAHAAIRIGVDGYFGYPITPQSEILETLAEEKPWETTGMVVLQAESEVAAINMVYGGAASGKMVMTSSSSPGVSLKQEGISYIAGAELPCLIVNVMRGGPGLGTIQPSQADYFQTVKGGGHGDYRLIALAPASVQEMADFVGIAFDLAFKYRNPAIILADGVIGQMMEKVVLPEQRTRLTDEEVIARCPWATTGRTHHRTPNIITSLELDPAEMEKRNIHLQKKYAEIEENEVRFEELHCEDAEYLIVAFGSCARIAQKAMEIAREEGIKVGLLRPITLWPFPSKAIAARAAQVKGILTVELNAGQMVEDVRLAVECKVPVEHFGRLGGIVPDPDEVITALKEKLIK
8720	GC_00001505		PV26FA01	2923	5	5	1	1	0.99963	1	0.999815	COG0674	Pyruvate:ferredoxin oxidoreductase or related 2-oxoacid:ferredoxin oxidoreductase, alpha subunit (PorA) (PDB:5C4I)	COG0674	Pyruvate oxidation	C	Energy production and conversion	MAEEVVLMKGNEAIAHAAIRIGVDGYFGYPITPQSEILETLAEEKPWETTGMVVLQAESEVAAINMVYGGAASGKMVMTSSSSPGVSLKQEGISYIAGAELPCLIVNVMRGGPGLGTIQPSQADYFQTVKGGGHGDYRLIALAPASVQEMADFVGIAFDLAFKYRNPAIILADGVIGQMMEKVVLPEQRTRLTDEEVIARCPWATTGRTHHRTPNIITSLELDPAEMEKRNIHLQKKYAEIEENEVRFEELHCEDAEYLIVAFGSCARIAQKAMEMAREEGIKVGLLRPITLWPFPSKAIAARAAQVKGILTVELNAGQMVEDVRLAVECKVPVEHFGRLGGIVPDPDEVITALKEKLIK
8721	GC_00001505		PV29FA01	132	5	5	1	1	0.99963	1	0.999815	COG0674	Pyruvate:ferredoxin oxidoreductase or related 2-oxoacid:ferredoxin oxidoreductase, alpha subunit (PorA) (PDB:5C4I)	COG0674	Pyruvate oxidation	C	Energy production and conversion	MAEEVVLMKGNEAIAHAAIRIGVDGYFGYPITPQSEILETLAEEKPWETTGMVVLQAESEVAAINMVYGGAASGKMVMTSSSSPGVSLKQEGISYIAGAELPCLIVNVMRGGPGLGTIQPSQADYFQTVKGGGHGDYRLIALAPASVQEMADFVGIAFDLAFKYRNPAIILADGVIGQMMEKVVLPEQRTRLTDEEVIARCPWATTGRTHHRTPNIITSLELDPAEMEKRNIHLQKKYAEIEENEVRFEELHCEDAEYLIVAFGSCARIAQKAMEMAREEGIKVGLLRPITLWPFPSKAIAARAAQVKGILTVELNAGQMVEDVRLAVECKVPVEHFGRLGGIVPDPDEVITALKEKLIK
8722	GC_00001505		PV2SA01	2525	5	5	1	1	0.99963	1	0.999815	COG0674	Pyruvate:ferredoxin oxidoreductase or related 2-oxoacid:ferredoxin oxidoreductase, alpha subunit (PorA) (PDB:5C4I)	COG0674	Pyruvate oxidation	C	Energy production and conversion	MAEEVVLMKGNEAIAHAAIRIGVDGYFGYPITPQSEILETLAEEKPWETTGMVVLQAESEVAAINMVYGGAASGKMVMTSSSSPGVSLKQEGISYIAGAELPCLIVNVMRGGPGLGTIQPSQADYFQTVKGGGHGDYRLIALAPASVQEMADFVGIAFDLAFKYRNPAIILADGVIGQMMEKVVLPEQRTRLTDEEVIARCPWATTGRTHHRTPNIITSLELDPAEMEKRNIHLQKKYAEIEENEVRFEELHCEDAEYLIVAFGSCARIAQKAMEMAREEGIKVGLLRPITLWPFPSKAIAARAAQVKGILTVELNAGQMVEDVRLAVECKVPVEHFGRLGGIVPDPDEVITALKEKLIK
8723	GC_00001505		PV2SA02	3200	5	5	1	1	0.99963	1	0.999815	COG0674	Pyruvate:ferredoxin oxidoreductase or related 2-oxoacid:ferredoxin oxidoreductase, alpha subunit (PorA) (PDB:5C4I)	COG0674	Pyruvate oxidation	C	Energy production and conversion	MAEEVVLMKGNEAIAHAAIRIGVDGYFGYPITPQSEILETLAEEKPWETTGMVVLQAESEVAAINMVYGGAASGKMVMTSSSSPGVSLKQEGISYIAGAELPCLIVNVMRGGPGLGTIQPSQADYFQTVKGGGHGDYRLIALAPASVQEMADFVGIAFDLAFKYRNPAIILADGVIGQMMEKVVLPEQRTRLTDEEVIARCPWATTGRTHHRTPNIITSLELDPAEMEKRNIHLQKKYAEIEENEVRFEELHCEDAEYLIVAFGSCARIAQKAMEMAREEGIKVGLLRPITLWPFPSKAIAARAAQVKGILTVELNAGQMVEDVRLAVECKVPVEHFGRLGGIVPDPDEVITALKEKLIK
2854	GC_00000330		PV10SA01	2561	5	5	1	1	1	1	1	COG0636	FoF1-type ATP synthase, membrane subunit c/Archaeal/vacuolar-type H+-ATPase, subunit K (AtpE) (PDB:1C17)	COG0636	FoF1-type ATP synthase	C	Energy production and conversion	MLLAVLLQSAAAAGLGKLGAALGAAIAVIGAGIGIGKIGGSAMEAIARQPEAAGDIRMNMIIIAALVEGVALIAIIVCLLTLFL
2855	GC_00000330		PV26FA01	3608	5	5	1	1	1	1	1	COG0636	FoF1-type ATP synthase, membrane subunit c/Archaeal/vacuolar-type H+-ATPase, subunit K (AtpE) (PDB:1C17)	COG0636	FoF1-type ATP synthase	C	Energy production and conversion	MLLAVLLQSAAAAGLGKLGAALGAAIAVIGAGIGIGKIGGSAMEAIARQPEAAGDIRMNMIIIAALVEGVALIAIIVCLLTLFL
2856	GC_00000330		PV29FA01	1033	5	5	1	1	1	1	1	COG0636	FoF1-type ATP synthase, membrane subunit c/Archaeal/vacuolar-type H+-ATPase, subunit K (AtpE) (PDB:1C17)	COG0636	FoF1-type ATP synthase	C	Energy production and conversion	MLLAVLLQSAAAAGLGKLGAALGAAIAVIGAGIGIGKIGGSAMEAIARQPEAAGDIRMNMIIIAALVEGVALIAIIVCLLTLFL
2857	GC_00000330		PV2SA01	1310	5	5	1	1	1	1	1	COG0636	FoF1-type ATP synthase, membrane subunit c/Archaeal/vacuolar-type H+-ATPase, subunit K (AtpE) (PDB:1C17)	COG0636	FoF1-type ATP synthase	C	Energy production and conversion	MLLAVLLQSAAAAGLGKLGAALGAAIAVIGAGIGIGKIGGSAMEAIARQPEAAGDIRMNMIIIAALVEGVALIAIIVCLLTLFL
2858	GC_00000330		PV2SA02	1985	5	5	1	1	1	1	1	COG0636	FoF1-type ATP synthase, membrane subunit c/Archaeal/vacuolar-type H+-ATPase, subunit K (AtpE) (PDB:1C17)	COG0636	FoF1-type ATP synthase	C	Energy production and conversion	MLLAVLLQSAAAAGLGKLGAALGAAIAVIGAGIGIGKIGGSAMEAIARQPEAAGDIRMNMIIIAALVEGVALIAIIVCLLTLFL
5889	GC_00000938		PV10SA01	1906	5	5	1	1	1	1	1	COG0636	FoF1-type ATP synthase, membrane subunit c/Archaeal/vacuolar-type H+-ATPase, subunit K (AtpE) (PDB:1C17)	COG0636	FoF1-type ATP synthase	C	Energy production and conversion	MEMNLLIAYVGIAIMVGLSGIGSAYGVTIAGNASIGALKKNDSAFGNFLVLTALPGTQGLYGFAGYFMFQSIFGVLTPAITGIQAAAVLGSGIALGLVALFSAIRQGQVCANGIAAIGQGHNVFGNTLILAVFPELYAIVALAATFLMGSALAA
5890	GC_00000938		PV26FA01	4149	5	5	1	1	1	1	1	COG0636	FoF1-type ATP synthase, membrane subunit c/Archaeal/vacuolar-type H+-ATPase, subunit K (AtpE) (PDB:1C17)	COG0636	FoF1-type ATP synthase	C	Energy production and conversion	MEMNLLIAYVGIAIMVGLSGIGSAYGVTIAGNASIGALKKNDSAFGNFLVLTALPGTQGLYGFAGYFMFQSIFGVLTPAITGIQAAAVLGSGIALGLVALFSAIRQGQVCANGIAAIGQGHNVFGNTLILAVFPELYAIVALAATFLMGSALAA
5891	GC_00000938		PV29FA01	1460	5	5	1	1	1	1	1	COG0636	FoF1-type ATP synthase, membrane subunit c/Archaeal/vacuolar-type H+-ATPase, subunit K (AtpE) (PDB:1C17)	COG0636	FoF1-type ATP synthase	C	Energy production and conversion	MEMNLLIAYVGIAIMVGLSGIGSAYGVTIAGNASIGALKKNDSAFGNFLVLTALPGTQGLYGFAGYFMFQSIFGVLTPAITGIQAAAVLGSGIALGLVALFSAIRQGQVCANGIAAIGQGHNVFGNTLILAVFPELYAIVALAATFLMGSALAA
5892	GC_00000938		PV2SA01	1824	5	5	1	1	1	1	1	COG0636	FoF1-type ATP synthase, membrane subunit c/Archaeal/vacuolar-type H+-ATPase, subunit K (AtpE) (PDB:1C17)	COG0636	FoF1-type ATP synthase	C	Energy production and conversion	MEMNLLIAYVGIAIMVGLSGIGSAYGVTIAGNASIGALKKNDSAFGNFLVLTALPGTQGLYGFAGYFMFQSIFGVLTPAITGIQAAAVLGSGIALGLVALFSAIRQGQVCANGIAAIGQGHNVFGNTLILAVFPELYAIVALAATFLMGSALAA
5893	GC_00000938		PV2SA02	2499	5	5	1	1	1	1	1	COG0636	FoF1-type ATP synthase, membrane subunit c/Archaeal/vacuolar-type H+-ATPase, subunit K (AtpE) (PDB:1C17)	COG0636	FoF1-type ATP synthase	C	Energy production and conversion	MEMNLLIAYVGIAIMVGLSGIGSAYGVTIAGNASIGALKKNDSAFGNFLVLTALPGTQGLYGFAGYFMFQSIFGVLTPAITGIQAAAVLGSGIALGLVALFSAIRQGQVCANGIAAIGQGHNVFGNTLILAVFPELYAIVALAATFLMGSALAA
14714	GC_00002705		PV10SA01	3551	5	5	1	1	0.9965	1	0.998247	COG0538	Isocitrate dehydrogenase (Icd) (PDB:1IDD)	COG0538	TCA cycle	C	Energy production and conversion	MKKTVPYITGDGVGVEITPSMQAIVNAAVKKAYGSEHEIEWMEVLAGERAFNETGSWLPDETMEAFKKYGVGIKGPLTTPVGGGIRSLNVALRQTLDLYVCLRPVRWFSGVVSPVKEPQKVDMHIFRENTEDIYAGIEWEAGTPEAEKFYRFLHDEMGVAKVRFPESSSFGVKPVSKEGTERLVRAACKYALEHGLPSVTLVHKGNIMKFTEGGFKKWGYELAEREFGDAIASGKLVIKDCIADAFLQNTLLIPEEYSVVATLNLNGDYISDQLAAMVGGIGIAPGANINYNTGHAIFEATHGTAPNIAGKDVVNPCSLILSAVMMLEHFGWNKAAELIVNALESSFGEGRATHDLARFMPGGVSLGTSAFTKEIIERINS
14715	GC_00002705		PV26FA01	2611	5	5	1	1	0.9965	1	0.998247	COG0538	Isocitrate dehydrogenase (Icd) (PDB:1IDD)	COG0538	TCA cycle	C	Energy production and conversion	MKKTVPYITGDGVGVEITPSMQAIVNAAVKKAYGSEHEIEWIEVLAGERAFNETGSWLPDETMEAFKKYGVGIKGPLTTPVGGGIRSLNVALRQTLDLYVCLRPVRWFSGVVSPVKEPQKVDMHIFRENTEDIYAGIEWEAGTPEAEKFYRFLHDEMGVAKVRFPESSSFGVKPVSKEGTERLVRAACKYALEHGLPSVTLVHKGNIMKFTEGGFKKWGYELAEREFGDAIASGKLVIKDCIADAFLQNTLLIPEEYSVVATLNLNGDYISDQLAAMVGGIGIAPGANINYNTGHAIFEATHGTAPNIAGKDVVNPCSLILSAVMMLEHFGWNKAAELIVNALESSFGEGRATHDLARFMPGGVSLGTSAFTKEIIERINS
14716	GC_00002705		PV29FA01	4325	5	5	1	1	0.9965	1	0.998247	COG0538	Isocitrate dehydrogenase (Icd) (PDB:1IDD)	COG0538	TCA cycle	C	Energy production and conversion	MKKTVPYITGDGVGVEITPSMQAIVNAAVKKAYGNEHEIEWMEVLAGERAFNETGSWLPDETMEAFKKYGVGIKGPLTTPVGGGIRSLNVALRQTLDLYVCLRPVRWFSGVVSPVKEPQKVDMHIFRENTEDIYAGIEWEAGTPEAEKFYRFLHDEMGVAKVRFPESSSFGVKPVSKEGTERLVRAACKYALEHGLPSVTLVHKGNIMKFTEGGFKKWGYELAEREFGDAIASGKLVIKDCIADAFLQNTLLIPEEYSVVATLNLNGDYISDQLAAMVGGIGIAPGANINYNTGHAIFEATHGTAPNIAGKDVVNPCSLILSAVMMLEHFGWNKAAELIVNALESSFGEGRATHDLARFMPGGVSLGTSAFTKEIIERINS
14717	GC_00002705		PV2SA01	2933	5	5	1	1	0.9965	1	0.998247	COG0538	Isocitrate dehydrogenase (Icd) (PDB:1IDD)	COG0538	TCA cycle	C	Energy production and conversion	MKKTVPYITGDGVGVEITPAMQAIVNAAVKKAYGNEHEIEWMEVLAGERAFNETGSWLPDETMEAFKKYGVGIKGPLTTPVGGGIRSLNVALRQTLDLYVCLRPVRWFSGVVSPVKEPQKVDMHIFRENTEDIYAGIEWEAGTPEAEKFYRFLHDEMGVAKVRFPESSSFGVKPVSKEGTERLVRAACKYALEHGLPSVTLVHKGNIMKFTEGGFKKWGYELAEREFGDAIASGKLVIKDCIADAFLQNTLLIPEEYSVVATLNLNGDYISDQLAAMVGGIGIAPGANINYNTGHAIFEATHGTAPNIAGKDVVNPCSLILSAVMMLEHFGWNKAAELIVNALESSFGEGRATHDLARFMPGGVSLGTSAFTKEIIERINS
14718	GC_00002705		PV2SA02	3608	5	5	1	1	0.9965	1	0.998247	COG0538	Isocitrate dehydrogenase (Icd) (PDB:1IDD)	COG0538	TCA cycle	C	Energy production and conversion	MKKTVPYITGDGVGVEITPAMQAIVNAAVKKAYGNEHEIEWMEVLAGERAFNETGSWLPDETMEAFKKYGVGIKGPLTTPVGGGIRSLNVALRQTLDLYVCLRPVRWFSGVVSPVKEPQKVDMHIFRENTEDIYAGIEWEAGTPEAEKFYRFLHDEMGVAKVRFPESSSFGVKPVSKEGTERLVRAACKYALEHGLPSVTLVHKGNIMKFTEGGFKKWGYELAEREFGDAIASGKLVIKDCIADAFLQNTLLIPEEYSVVATLNLNGDYISDQLAAMVGGIGIAPGANINYNTGHAIFEATHGTAPNIAGKDVVNPCSLILSAVMMLEHFGWNKAAELIVNALESSFGEGRATHDLARFMPGGVSLGTSAFTKEIIERINS
4434	GC_00000646		PV10SA01	4241	5	5	1	1	1	1	1	COG0479	Succinate dehydrogenase/fumarate reductase, Fe-S protein subunit (SdhB/FrdB) (PDB:6LUM)	COG0479	TCA cycle	C	Energy production and conversion	MDKNISFTLKVWRQKGPKDKGHFDTFQMKDIPGDTSFLEMMDILNEQLINEGKEPIVFDHDCREGICGMCSMYINGHPHGPATGATTCQIYMRRFKDGDTITVEPWRSAGFPVIRDLMVDRSAYDKIMQAGGYVSINTGGIPDANAIPIAKPIADEAMDAAACIGCGACVAACKNGSAMLFVSAKVSQLALLPQGKVEAARRAKAMLSKMDELGFGNCTNTRACEAECPKLVSISNIARLNREFIAAKLKD
4435	GC_00000646		PV26FA01	1995	5	5	1	1	1	1	1	COG0479	Succinate dehydrogenase/fumarate reductase, Fe-S protein subunit (SdhB/FrdB) (PDB:6LUM)	COG0479	TCA cycle	C	Energy production and conversion	MDKNISFTLKVWRQKGPKDKGHFDTFQMKDIPGDTSFLEMMDILNEQLINEGKEPIVFDHDCREGICGMCSMYINGHPHGPATGATTCQIYMRRFKDGDTITVEPWRSAGFPVIRDLMVDRSAYDKIMQAGGYVSINTGGIPDANAIPIAKPIADEAMDAAACIGCGACVAACKNGSAMLFVSAKVSQLALLPQGKVEAARRAKAMLSKMDELGFGNCTNTRACEAECPKLVSISNIARLNREFIAAKLKD
4436	GC_00000646		PV29FA01	3487	5	5	1	1	1	1	1	COG0479	Succinate dehydrogenase/fumarate reductase, Fe-S protein subunit (SdhB/FrdB) (PDB:6LUM)	COG0479	TCA cycle	C	Energy production and conversion	MDKNISFTLKVWRQKGPKDKGHFDTFQMKDIPGDTSFLEMMDILNEQLINEGKEPIVFDHDCREGICGMCSMYINGHPHGPATGATTCQIYMRRFKDGDTITVEPWRSAGFPVIRDLMVDRSAYDKIMQAGGYVSINTGGIPDANAIPIAKPIADEAMDAAACIGCGACVAACKNGSAMLFVSAKVSQLALLPQGKVEAARRAKAMLSKMDELGFGNCTNTRACEAECPKLVSISNIARLNREFIAAKLKD
4437	GC_00000646		PV2SA01	4102	5	5	1	1	1	1	1	COG0479	Succinate dehydrogenase/fumarate reductase, Fe-S protein subunit (SdhB/FrdB) (PDB:6LUM)	COG0479	TCA cycle	C	Energy production and conversion	MDKNISFTLKVWRQKGPKDKGHFDTFQMKDIPGDTSFLEMMDILNEQLINEGKEPIVFDHDCREGICGMCSMYINGHPHGPATGATTCQIYMRRFKDGDTITVEPWRSAGFPVIRDLMVDRSAYDKIMQAGGYVSINTGGIPDANAIPIAKPIADEAMDAAACIGCGACVAACKNGSAMLFVSAKVSQLALLPQGKVEAARRAKAMLSKMDELGFGNCTNTRACEAECPKLVSISNIARLNREFIAAKLKD
4438	GC_00000646		PV2SA02	113	5	5	1	1	1	1	1	COG0479	Succinate dehydrogenase/fumarate reductase, Fe-S protein subunit (SdhB/FrdB) (PDB:6LUM)	COG0479	TCA cycle	C	Energy production and conversion	MDKNISFTLKVWRQKGPKDKGHFDTFQMKDIPGDTSFLEMMDILNEQLINEGKEPIVFDHDCREGICGMCSMYINGHPHGPATGATTCQIYMRRFKDGDTITVEPWRSAGFPVIRDLMVDRSAYDKIMQAGGYVSINTGGIPDANAIPIAKPIADEAMDAAACIGCGACVAACKNGSAMLFVSAKVSQLALLPQGKVEAARRAKAMLSKMDELGFGNCTNTRACEAECPKLVSISNIARLNREFIAAKLKD
3919	GC_00000543		PV10SA01	3758	5	5	1	1	1	1	1	COG0377	NADH:ubiquinone oxidoreductase 20 kD subunit (chain B) or related Fe-S oxidoreductase (NuoB) (PDB:2FUG) (PUBMED:25941396)	COG0377	NADH dehydrogenase	C	Energy production and conversion	MEVKKPTIKSIPYEDFKDNEYLENMVKQLNEGGTKVLVGCLDDLINWGRSNSLWPLTFATSCCGIEFMAVGAARYDFARFGFEVARASPRQADMIMVAGTITHKMAPVLKRLYDQMADPKYVIAVGGCAISGGPFKKSYHVLNGVDKILPVDVYIPGCPPRPEALLYGMIQLQRKVKLEKFFGGVNRKENEPQNPEQA
3920	GC_00000543		PV26FA01	2392	5	5	1	1	1	1	1	COG0377	NADH:ubiquinone oxidoreductase 20 kD subunit (chain B) or related Fe-S oxidoreductase (NuoB) (PDB:2FUG) (PUBMED:25941396)	COG0377	NADH dehydrogenase	C	Energy production and conversion	MEVKKPTIKSIPYEDFKDNEYLENMVKQLNEGGTKVLVGCLDDLINWGRSNSLWPLTFATSCCGIEFMAVGAARYDFARFGFEVARASPRQADMIMVAGTITHKMAPVLKRLYDQMADPKYVIAVGGCAISGGPFKKSYHVLNGVDKILPVDVYIPGCPPRPEALLYGMIQLQRKVKLEKFFGGVNRKENEPQNPEQA
3921	GC_00000543		PV29FA01	4118	5	5	1	1	1	1	1	COG0377	NADH:ubiquinone oxidoreductase 20 kD subunit (chain B) or related Fe-S oxidoreductase (NuoB) (PDB:2FUG) (PUBMED:25941396)	COG0377	NADH dehydrogenase	C	Energy production and conversion	MEVKKPTIKSIPYEDFKDNEYLENMVKQLNEGGTKVLVGCLDDLINWGRSNSLWPLTFATSCCGIEFMAVGAARYDFARFGFEVARASPRQADMIMVAGTITHKMAPVLKRLYDQMADPKYVIAVGGCAISGGPFKKSYHVLNGVDKILPVDVYIPGCPPRPEALLYGMIQLQRKVKLEKFFGGVNRKENEPQNPEQA
3922	GC_00000543		PV2SA01	3125	5	5	1	1	1	1	1	COG0377	NADH:ubiquinone oxidoreductase 20 kD subunit (chain B) or related Fe-S oxidoreductase (NuoB) (PDB:2FUG) (PUBMED:25941396)	COG0377	NADH dehydrogenase	C	Energy production and conversion	MEVKKPTIKSIPYEDFKDNEYLENMVKQLNEGGTKVLVGCLDDLINWGRSNSLWPLTFATSCCGIEFMAVGAARYDFARFGFEVARASPRQADMIMVAGTITHKMAPVLKRLYDQMADPKYVIAVGGCAISGGPFKKSYHVLNGVDKILPVDVYIPGCPPRPEALLYGMIQLQRKVKLEKFFGGVNRKENEPQNPEQA
3923	GC_00000543		PV2SA02	3800	5	5	1	1	1	1	1	COG0377	NADH:ubiquinone oxidoreductase 20 kD subunit (chain B) or related Fe-S oxidoreductase (NuoB) (PDB:2FUG) (PUBMED:25941396)	COG0377	NADH dehydrogenase	C	Energy production and conversion	MEVKKPTIKSIPYEDFKDNEYLENMVKQLNEGGTKVLVGCLDDLINWGRSNSLWPLTFATSCCGIEFMAVGAARYDFARFGFEVARASPRQADMIMVAGTITHKMAPVLKRLYDQMADPKYVIAVGGCAISGGPFKKSYHVLNGVDKILPVDVYIPGCPPRPEALLYGMIQLQRKVKLEKFFGGVNRKENEPQNPEQA
7089	GC_00001179		PV10SA01	3550	5	5	1	1	0.999105	1	0.999552	COG0372	Citrate synthase (GltA) (PDB:3TQG) (PUBMED:25211225)	COG0372	TCA cycle	C	Energy production and conversion	MKKEYIIYKLSEEMKNATRIENELFKKFDVKRGLRNEDGTGVLVGLTKIGNVVGYERIPGGGLKPIPGKLFYRGYDLEDLAHSIIKEKRFGFEEVAYLLLSGHLPDKEELASFCELINDNTPLEQKTKMNIIELEGNNIMNILARSVLEMYRFDPQADDTSRDNLMRQSIDLISKFPTIIAYAYNMLRHATYGRSLHIRHPREKLSIAENFLYMLKKDYTELDARTLDLLLVLQAEHGGGNNSTFTVRVVSSSRTDTYSAIAAGIGSLKGPLHGGANIQVADMFHHLQENIKDWTNVDEIDTYFTRMLNKEAYDKSGLIYGIGHAVYTISDPRAILLKELARDLAKEKGKEEEFAFLELLEERAIAMFGKIKNNGKTVSSNIDFYSGFVYEMIGLPQEI…
7090	GC_00001179		PV26FA01	2612	5	5	1	1	0.999105	1	0.999552	COG0372	Citrate synthase (GltA) (PDB:3TQG) (PUBMED:25211225)	COG0372	TCA cycle	C	Energy production and conversion	MKKEYIIYKLSEEMKNATRIENELFKKFDVKRGLRNEDGTGVLVGLTKIGNVVGYERIPGRGLKPIPGKLFYRGYDLEDLAHSIIKEKRFGFEEVAYLLLSGHLPDKEELASFCELINDNTPLEQKTKMNIIELEGNNIMNILARSVLEMYRFDPQADDTSRDNLMRQSIDLISKFPTIIAYAYNMLRHATYGRSLHIRHPREKLSIAENFLYMLKKDYTELDARTLDLLLVLQAEHGGGNNSTFTVRVVSSSRTDTYSAIAAGIGSLKGPLHGGANIQVADMFHHLQENIKDWTNVDEIDTYFTRMLNKEAYDKSGLIYGIGHAVYTISDPRAILLKELARDLAKEKGKEEEFAFLELLEERAIAMFGKIKNNGKTVSSNIDFYSGFVYEMIGLPQEI…
7091	GC_00001179		PV29FA01	4326	5	5	1	1	0.999105	1	0.999552	COG0372	Citrate synthase (GltA) (PDB:3TQG) (PUBMED:25211225)	COG0372	TCA cycle	C	Energy production and conversion	MKKEYIIYKLSEEMKNATRIENELFKKFDVKRGLRNEDGTGVLVGLTKIGNVVGYERIPGGGLKPIPGKLFYRGYDLEDLAHSIIKEKRFGFEEVAYLLLSGHLPDKEELASFCELINDNTPLEQKTKMNIIELEGNNIMNILARSVLEMYRFDPQADDTSRDNLMRQSIDLISKFPTIIAYAYNMLRHATYGRSLHIRHPREKLSIAENFLYMLKKDYTELDARTLDLLLVLQAEHGGGNNSTFTVRVVSSSRTDTYSAIAAGIGSLKGPLHGGANIQVADMFHHLQENIKDWTNVDEIDTYFTRMLNKEAYDKSGLIYGIGHAVYTISDPRAILLKELARDLAKEKGKEEEFAFLELLEERAIAMFGKIKNNGKTVSSNIDFYSGFVYEMIGLPQEI…
7092	GC_00001179		PV2SA01	2932	5	5	1	1	0.999105	1	0.999552	COG0372	Citrate synthase (GltA) (PDB:3TQG) (PUBMED:25211225)	COG0372	TCA cycle	C	Energy production and conversion	MKKEYIIYKLSEEMKNATRIENELFKKFDVKRGLRNEDGTGVLVGLTKIGNVVGYERIPGGGLKPIPGKLFYRGYDLEDLAHSIIKEKRFGFEEVAYLLLSGHLPDKEELASFCELINDNTPLEQKTKMNIIELEGNNIMNILARSVLEMYRFDPQADDTSRDNLMRQSIDLISKFPTIIAYAYNMLRHATYGRSLHIRHPREKLSIAENFLYMLKKDYTELDARTLDLLLVLQAEHGGGNNSTFTVRVVSSSRTDTYSAIAAGIGSLKGPLHGGANIQVADMFHHLQENIKDWTNVDEIDTYFTRMLNKEAYDKSGLIYGIGHAVYTISDPRAILLKELARDLAKEKGKEEEFAFLELLEERAIAMFGKIKNNGKTVSSNIDFYSGFVYEMIGLPQEI…
7093	GC_00001179		PV2SA02	3607	5	5	1	1	0.999105	1	0.999552	COG0372	Citrate synthase (GltA) (PDB:3TQG) (PUBMED:25211225)	COG0372	TCA cycle	C	Energy production and conversion	MKKEYIIYKLSEEMKNATRIENELFKKFDVKRGLRNEDGTGVLVGLTKIGNVVGYERIPGGGLKPIPGKLFYRGYDLEDLAHSIIKEKRFGFEEVAYLLLSGHLPDKEELASFCELINDNTPLEQKTKMNIIELEGNNIMNILARSVLEMYRFDPQADDTSRDNLMRQSIDLISKFPTIIAYAYNMLRHATYGRSLHIRHPREKLSIAENFLYMLKKDYTELDARTLDLLLVLQAEHGGGNNSTFTVRVVSSSRTDTYSAIAAGIGSLKGPLHGGANIQVADMFHHLQENIKDWTNVDEIDTYFTRMLNKEAYDKSGLIYGIGHAVYTISDPRAILLKELARDLAKEKGKEEEFAFLELLEERAIAMFGKIKNNGKTVSSNIDFYSGFVYEMIGLPQEI…
6869	GC_00001135		PV10SA01	2562	5	5	1	1	0.998898	1	0.999449	COG0356	FoF1-type ATP synthase, membrane subunit a (AtpB) (PUBMED:22931285)	COG0356	FoF1-type ATP synthase	C	Energy production and conversion	MRSLRYIGTVLMLLIAFLQGANAREESETDYKEQQVDVNEIVFGHIGDSYEWHITDIGDTPIAIPLPVIVKSSTGWHVFLSSRFEEGNGEYEGLYIAKDGEYKGKIVEKDASGNEVKPLDISITKNVTGLFVNSAILVILVLSCARWYKKHPVEKEAPKGMVGMMEACILAINDDVIKGCIGKDYKRYAPYLLTAFFFILINNLMGLIPFFPGGANITGNIAVTFVLAICTFLAVNLWGNKEYWKEILWPDVPWWLKAPFPMMPIIEIFGIFTKPFALMIRLFANMMAGHAAILSLISIIFITANMGPLINGSMGFVAVAFGIFMTALELLVAFIQAYVFTMLSAVFIGLSRTEEMREEKEMK
6870	GC_00001135		PV26FA01	3607	5	5	1	1	0.998898	1	0.999449	COG0356	FoF1-type ATP synthase, membrane subunit a (AtpB) (PUBMED:22931285)	COG0356	FoF1-type ATP synthase	C	Energy production and conversion	MRSLRYIGTVLMLLIAFLQGANAREESETDYKEQQVDVNEIVFGHIGDSYEWHITDIGDTPIAIPLPVIVKSSTGWHVFLSSRFEEGNGEYEGLYIAKDGEYKGKIVEKDASGNEVKPLDISITKNVTGLFVNSAILVILVLSCARWYKKHPVEKEAPKGMVGMMEACILAINDDVIKGCIGKDYKRYAPYLLTAFFFILINNLMGLIPFFPGGANITGNIAVTFVLAICTFLAVNLWGNKEYWKEILWPDVPWWLKAPFPMMPIIEIFGIFTKPFALMIRLFANMMAGHAAILSLISIIFITANMGPLINGSMGFVAVAFGIFMTALELLVAFIQAYVFTMLSAVFIGLSRTEEMREEKEMK
6871	GC_00001135		PV29FA01	1032	5	5	1	1	0.998898	1	0.999449	COG0356	FoF1-type ATP synthase, membrane subunit a (AtpB) (PUBMED:22931285)	COG0356	FoF1-type ATP synthase	C	Energy production and conversion	MRSLRYIGTVLMLLIAFLQGANAREESETDYKEQPVDVNEIVFGHIGDSYEWHITDIGDTPIAIPLPVIVKSSTGWHVFLSSRFEEGNGEYEGLYIAKDGEYKGKIVEKDASGNEVKPLDISITKNVTGLFVNSAILVILVLSCARWYKKHPVEKEAPKGMVGMMEACILAINDDVIKGCIGKDYKRYAPYLLTAFFFILINNLMGLIPFFPGGANITGNIAVTFVLAICTFLAVNLWGNKEYWKEILWPDVPWWLKAPFPMMPIIEIFGIFTKPFALMIRLFANMMAGHAAILSLISIIFITANMGPLINGSMGFVAVAFGIFMTALELLVAFIQAYVFTMLSAVFIGLSRTEEMREEKEMK
6872	GC_00001135		PV2SA01	1309	5	5	1	1	0.998898	1	0.999449	COG0356	FoF1-type ATP synthase, membrane subunit a (AtpB) (PUBMED:22931285)	COG0356	FoF1-type ATP synthase	C	Energy production and conversion	MRSLRYIGTVLMLLIAFLQGANAREESETDYKEQQVDVNEIVFGHIGDSYEWHITDIGDTPIAIPLPVIVKSSTGWHVFLSSRFEEGNGEYEGLYIAKDGEYKGKIVEKDASGNEVKPLDISITKNVTGLFVNSAILVILVLSCARWYKKHPVEKEAPKGMVGMMEACILAINDDVIKGCIGKDYKRYAPYLLTAFFFILINNLMGLIPFFPGGANITGNIAVTFVLAICTFLAVNLWGNKEYWKEILWPDVPWWLKAPFPMMPIIEIFGIFTKPFALMIRLFANMMAGHAAILSLISIIFITANMGPLINGSMGFVAVAFGIFMTALELLVAFIQAYVFTMLSAVFIGLSRTEEMREEKEMK
6873	GC_00001135		PV2SA02	1984	5	5	1	1	0.998898	1	0.999449	COG0356	FoF1-type ATP synthase, membrane subunit a (AtpB) (PUBMED:22931285)	COG0356	FoF1-type ATP synthase	C	Energy production and conversion	MRSLRYIGTVLMLLIAFLQGANAREESETDYKEQQVDVNEIVFGHIGDSYEWHITDIGDTPIAIPLPVIVKSSTGWHVFLSSRFEEGNGEYEGLYIAKDGEYKGKIVEKDASGNEVKPLDISITKNVTGLFVNSAILVILVLSCARWYKKHPVEKEAPKGMVGMMEACILAINDDVIKGCIGKDYKRYAPYLLTAFFFILINNLMGLIPFFPGGANITGNIAVTFVLAICTFLAVNLWGNKEYWKEILWPDVPWWLKAPFPMMPIIEIFGIFTKPFALMIRLFANMMAGHAAILSLISIIFITANMGPLINGSMGFVAVAFGIFMTALELLVAFIQAYVFTMLSAVFIGLSRTEEMREEKEMK
4884	GC_00000736		PV10SA01	2564	5	5	1	1	1	1	1	COG0355	FoF1-type ATP synthase, epsilon subunit (AtpC) (PDB:3OAA) (PUBMED:29149348;30304218)	COG0355	FoF1-type ATP synthase	C	Energy production and conversion	MEHHEDLHLIVVSPESTLFDGKVEIVTLPGELGSFSVLYDHAPLISSLIKGEIKYTEDELEKSIGISSGFVEVRDNIVSACVEI
4885	GC_00000736		PV26FA01	3605	5	5	1	1	1	1	1	COG0355	FoF1-type ATP synthase, epsilon subunit (AtpC) (PDB:3OAA) (PUBMED:29149348;30304218)	COG0355	FoF1-type ATP synthase	C	Energy production and conversion	MEHHEDLHLIVVSPESTLFDGKVEIVTLPGELGSFSVLYDHAPLISSLIKGEIKYTEDELEKSIGISSGFVEVRDNIVSACVEI
4886	GC_00000736		PV29FA01	1030	5	5	1	1	1	1	1	COG0355	FoF1-type ATP synthase, epsilon subunit (AtpC) (PDB:3OAA) (PUBMED:29149348;30304218)	COG0355	FoF1-type ATP synthase	C	Energy production and conversion	MEHHEDLHLIVVSPESTLFDGKVEIVTLPGELGSFSVLYDHAPLISSLIKGEIKYTEDELEKSIGISSGFVEVRDNIVSACVEI
4887	GC_00000736		PV2SA01	1307	5	5	1	1	1	1	1	COG0355	FoF1-type ATP synthase, epsilon subunit (AtpC) (PDB:3OAA) (PUBMED:29149348;30304218)	COG0355	FoF1-type ATP synthase	C	Energy production and conversion	MEHHEDLHLIVVSPESTLFDGKVEIVTLPGELGSFSVLYDHAPLISSLIKGEIKYTEDELEKSIGISSGFVEVRDNIVSACVEI
4888	GC_00000736		PV2SA02	1982	5	5	1	1	1	1	1	COG0355	FoF1-type ATP synthase, epsilon subunit (AtpC) (PDB:3OAA) (PUBMED:29149348;30304218)	COG0355	FoF1-type ATP synthase	C	Energy production and conversion	MEHHEDLHLIVVSPESTLFDGKVEIVTLPGELGSFSVLYDHAPLISSLIKGEIKYTEDELEKSIGISSGFVEVRDNIVSACVEI
2979	GC_00000355		PV10SA01	1400	5	5	1	1	1	1	1	COG0240	Glycerol-3-phosphate dehydrogenase (GpsA) (PDB:1EVY)	COG0240	Isoprenoid biosynthesis	C	Energy production and conversion	MKLPGKIAIMGGGSWATAIAKIVLAQAESINWYMRRDDRIEEFKRLGHNPAYLTSVRFEIKNINFSSDINKIVKESDTLIFVTPSPYLKSHLKKLKTKIKDKFIVTAIKGIVPDENLIVSDYFHQVYGVPEENIAVIAGPCHAEEVALERLSYLTIGCKDIDKAKIFARQLAGHYIKTSVSPDVAGIEYASVLKNIYAIAAGICSGLKYGDNFQAVLISNAIQEMNRFLNTVHPVERSIDDSAYLGDLLVTSYSNFSRNRVFGTMIGKGYSVKSAQIEMEMIAEGYYGTKCIKELNKHLHVNMPIVDAVYNILYERISPMIEIKLLTDSFR
2980	GC_00000355		PV26FA01	645	5	5	1	1	1	1	1	COG0240	Glycerol-3-phosphate dehydrogenase (GpsA) (PDB:1EVY)	COG0240	Isoprenoid biosynthesis	C	Energy production and conversion	MKLPGKIAIMGGGSWATAIAKIVLAQAESINWYMRRDDRIEEFKRLGHNPAYLTSVRFEIKNINFSSDINKIVKESDTLIFVTPSPYLKSHLKKLKTKIKDKFIVTAIKGIVPDENLIVSDYFHQVYGVPEENIAVIAGPCHAEEVALERLSYLTIGCKDIDKAKIFARQLAGHYIKTSVSPDVAGIEYASVLKNIYAIAAGICSGLKYGDNFQAVLISNAIQEMNRFLNTVHPVERSIDDSAYLGDLLVTSYSNFSRNRVFGTMIGKGYSVKSAQIEMEMIAEGYYGTKCIKELNKHLHVNMPIVDAVYNILYERISPMIEIKLLTDSFR
2981	GC_00000355		PV29FA01	2236	5	5	1	1	1	1	1	COG0240	Glycerol-3-phosphate dehydrogenase (GpsA) (PDB:1EVY)	COG0240	Isoprenoid biosynthesis	C	Energy production and conversion	MKLPGKIAIMGGGSWATAIAKIVLAQAESINWYMRRDDRIEEFKRLGHNPAYLTSVRFEIKNINFSSDINKIVKESDTLIFVTPSPYLKSHLKKLKTKIKDKFIVTAIKGIVPDENLIVSDYFHQVYGVPEENIAVIAGPCHAEEVALERLSYLTIGCKDIDKAKIFARQLAGHYIKTSVSPDVAGIEYASVLKNIYAIAAGICSGLKYGDNFQAVLISNAIQEMNRFLNTVHPVERSIDDSAYLGDLLVTSYSNFSRNRVFGTMIGKGYSVKSAQIEMEMIAEGYYGTKCIKELNKHLHVNMPIVDAVYNILYERISPMIEIKLLTDSFR
2982	GC_00000355		PV2SA01	768	5	5	1	1	1	1	1	COG0240	Glycerol-3-phosphate dehydrogenase (GpsA) (PDB:1EVY)	COG0240	Isoprenoid biosynthesis	C	Energy production and conversion	MKLPGKIAIMGGGSWATAIAKIVLAQAESINWYMRRDDRIEEFKRLGHNPAYLTSVRFEIKNINFSSDINKIVKESDTLIFVTPSPYLKSHLKKLKTKIKDKFIVTAIKGIVPDENLIVSDYFHQVYGVPEENIAVIAGPCHAEEVALERLSYLTIGCKDIDKAKIFARQLAGHYIKTSVSPDVAGIEYASVLKNIYAIAAGICSGLKYGDNFQAVLISNAIQEMNRFLNTVHPVERSIDDSAYLGDLLVTSYSNFSRNRVFGTMIGKGYSVKSAQIEMEMIAEGYYGTKCIKELNKHLHVNMPIVDAVYNILYERISPMIEIKLLTDSFR
2983	GC_00000355		PV2SA02	1443	5	5	1	1	1	1	1	COG0240	Glycerol-3-phosphate dehydrogenase (GpsA) (PDB:1EVY)	COG0240	Isoprenoid biosynthesis	C	Energy production and conversion	MKLPGKIAIMGGGSWATAIAKIVLAQAESINWYMRRDDRIEEFKRLGHNPAYLTSVRFEIKNINFSSDINKIVKESDTLIFVTPSPYLKSHLKKLKTKIKDKFIVTAIKGIVPDENLIVSDYFHQVYGVPEENIAVIAGPCHAEEVALERLSYLTIGCKDIDKAKIFARQLAGHYIKTSVSPDVAGIEYASVLKNIYAIAAGICSGLKYGDNFQAVLISNAIQEMNRFLNTVHPVERSIDDSAYLGDLLVTSYSNFSRNRVFGTMIGKGYSVKSAQIEMEMIAEGYYGTKCIKELNKHLHVNMPIVDAVYNILYERISPMIEIKLLTDSFR
6104	GC_00000981		PV10SA01	2557	5	5	1	1	1	1	1	COG0224	FoF1-type ATP synthase, gamma subunit (AtpG) (PDB:3OAA) (PUBMED:15326535)	COG0224	FoF1-type ATP synthase	C	Energy production and conversion	MASLKEVKGRIASVNNTRKITSAMKMVASAKLHKAQAAIENMLPYERRLNHILTNFLSADSEVESPFIVKREVKRVAIVVFASNTSLCGGFNANIIRHLTVILDEYKSLGMENVLLYPVGRKVAEGVKKLGFKAEGDFQHMADKPSYQEAAALAEDLMRRFLHRDIDKVELLYNHFRSTAVQVLTRETYLPIDLTQEKKEEDKGRIPDYIVEPSVDVVMGELLPKVLRMKMFTVLLDSNASEHAARTMAMQIATDNANDLLQDLTVMYNKSRQQAITNELLDIVGGSMA
6105	GC_00000981		PV26FA01	3612	5	5	1	1	1	1	1	COG0224	FoF1-type ATP synthase, gamma subunit (AtpG) (PDB:3OAA) (PUBMED:15326535)	COG0224	FoF1-type ATP synthase	C	Energy production and conversion	MASLKEVKGRIASVNNTRKITSAMKMVASAKLHKAQAAIENMLPYERRLNHILTNFLSADSEVESPFIVKREVKRVAIVVFASNTSLCGGFNANIIRHLTVILDEYKSLGMENVLLYPVGRKVAEGVKKLGFKAEGDFQHMADKPSYQEAAALAEDLMRRFLHRDIDKVELLYNHFRSTAVQVLTRETYLPIDLTQEKKEEDKGRIPDYIVEPSVDVVMGELLPKVLRMKMFTVLLDSNASEHAARTMAMQIATDNANDLLQDLTVMYNKSRQQAITNELLDIVGGSMA
6106	GC_00000981		PV29FA01	1037	5	5	1	1	1	1	1	COG0224	FoF1-type ATP synthase, gamma subunit (AtpG) (PDB:3OAA) (PUBMED:15326535)	COG0224	FoF1-type ATP synthase	C	Energy production and conversion	MASLKEVKGRIASVNNTRKITSAMKMVASAKLHKAQAAIENMLPYERRLNHILTNFLSADSEVESPFIVKREVKRVAIVVFASNTSLCGGFNANIIRHLTVILDEYKSLGMENVLLYPVGRKVAEGVKKLGFKAEGDFQHMADKPSYQEAAALAEDLMRRFLHRDIDKVELLYNHFRSTAVQVLTRETYLPIDLTQEKKEEDKGRIPDYIVEPSVDVVMGELLPKVLRMKMFTVLLDSNASEHAARTMAMQIATDNANDLLQDLTVMYNKSRQQAITNELLDIVGGSMA
6107	GC_00000981		PV2SA01	1314	5	5	1	1	1	1	1	COG0224	FoF1-type ATP synthase, gamma subunit (AtpG) (PDB:3OAA) (PUBMED:15326535)	COG0224	FoF1-type ATP synthase	C	Energy production and conversion	MASLKEVKGRIASVNNTRKITSAMKMVASAKLHKAQAAIENMLPYERRLNHILTNFLSADSEVESPFIVKREVKRVAIVVFASNTSLCGGFNANIIRHLTVILDEYKSLGMENVLLYPVGRKVAEGVKKLGFKAEGDFQHMADKPSYQEAAALAEDLMRRFLHRDIDKVELLYNHFRSTAVQVLTRETYLPIDLTQEKKEEDKGRIPDYIVEPSVDVVMGELLPKVLRMKMFTVLLDSNASEHAARTMAMQIATDNANDLLQDLTVMYNKSRQQAITNELLDIVGGSMA
6108	GC_00000981		PV2SA02	1989	5	5	1	1	1	1	1	COG0224	FoF1-type ATP synthase, gamma subunit (AtpG) (PDB:3OAA) (PUBMED:15326535)	COG0224	FoF1-type ATP synthase	C	Energy production and conversion	MASLKEVKGRIASVNNTRKITSAMKMVASAKLHKAQAAIENMLPYERRLNHILTNFLSADSEVESPFIVKREVKRVAIVVFASNTSLCGGFNANIIRHLTVILDEYKSLGMENVLLYPVGRKVAEGVKKLGFKAEGDFQHMADKPSYQEAAALAEDLMRRFLHRDIDKVELLYNHFRSTAVQVLTRETYLPIDLTQEKKEEDKGRIPDYIVEPSVDVVMGELLPKVLRMKMFTVLLDSNASEHAARTMAMQIATDNANDLLQDLTVMYNKSRQQAITNELLDIVGGSMA
8079	GC_00001377		PV10SA01	2558	5	5	1	1	0.999748	1	0.999874	COG0056	FoF1-type ATP synthase, alpha subunit (AtpA) (PDB:3OAA)	COG0056	FoF1-type ATP synthase	C	Energy production and conversion	MSENIKPSEVSEVLLQQLKGIDTHLQFDEVGNVLQVSDGVARIYGLHNAEANELLEFENGIMAIVMNLEEDNVGAVLLGPTDQIKEGMVVKRTKRIASINVGEGMLGRVIDPLGVPLDGRGQIGGELCEMPLERKAPGVIFRQPVNQPLQTGLKSVDAMIPIGRGQRELIIGDRQTGKTSIAIDTILNQKSNYEAGKPVYCIYVAIGQKGSTVASLVNTLRERGAMDYTIVVAATAADPAALQYFAPFAGAAIGEYFRDTGRDALVVYDDLSKQAVAYREVSLILRRPSGREAYPGDIFYLHSRLLERAAKIINQQEVAEQMNDLPPSLKGKVKAGGSLTALPIIETQAGDVSAYIPTNVISITDGQIFLETDLFNQGFRPAINVGISVSRVGGSAQIK…
8080	GC_00001377		PV26FA01	3611	5	5	1	1	0.999748	1	0.999874	COG0056	FoF1-type ATP synthase, alpha subunit (AtpA) (PDB:3OAA)	COG0056	FoF1-type ATP synthase	C	Energy production and conversion	MSENIKPSEVSEVLLQQLKGIDTHLQFDEVGNVLQVSDGVARIYGLRNAEANELLEFENGIMAIVMNLEEDNVGAVLLGPTDQIKEGMVVKRTKRIASINVGEGMLGRVIDPLGVPLDGRGQIGGELCEMPLERKAPGVIFRQPVNQPLQTGLKSVDAMIPIGRGQRELIIGDRQTGKTSIAIDTILNQKSNYEAGKPVYCIYVAIGQKGSTVASLVNTLRERGAMDYTIVVAATAADPAALQYFAPFAGAAIGEYFRDTGRDALVVYDDLSKQAVAYREVSLILRRPSGREAYPGDIFYLHSRLLERAAKIINQQEVAEQMNDLPPSLKGKVKAGGSLTALPIIETQAGDVSAYIPTNVISITDGQIFLETDLFNQGFRPAINVGISVSRVGGSAQIK…
8081	GC_00001377		PV29FA01	1036	5	5	1	1	0.999748	1	0.999874	COG0056	FoF1-type ATP synthase, alpha subunit (AtpA) (PDB:3OAA)	COG0056	FoF1-type ATP synthase	C	Energy production and conversion	MSENIKPSEVSEVLLQQLKGIDTHLQFDEVGNVLQVSDGVARIYGLRNAEANELLEFENGIMAIVMNLEEDNVGAVLLGPTDQIKEGMVVKRTKRIASINVGEGMLGRVIDPLGVPLDGRGQIGGELCEMPLERKAPGVIFRQPVNQPLQTGLKSVDAMIPIGRGQRELIIGDRQTGKTSIAIDTILNQKSNYEAGKPVYCIYVAIGQKGSTVASLVNTLRERGAMDYTIVVAATAADPAALQYFAPFAGAAIGEYFRDTGRDALVVYDDLSKQAVAYREVSLILRRPSGREAYPGDIFYLHSRLLERAAKIINQQEVAEQMNDLPPSLKGKVKAGGSLTALPIIETQAGDVSAYIPTNVISITDGQIFLETDLFNQGFRPAINVGISVSRVGGSAQIK…
8082	GC_00001377		PV2SA01	1313	5	5	1	1	0.999748	1	0.999874	COG0056	FoF1-type ATP synthase, alpha subunit (AtpA) (PDB:3OAA)	COG0056	FoF1-type ATP synthase	C	Energy production and conversion	MSENIKPSEVSEVLLQQLKGIDTHLQFDEVGNVLQVSDGVARIYGLRNAEANELLEFENGIMAIVMNLEEDNVGAVLLGPTDQIKEGMVVKRTKRIASINVGEGMLGRVIDPLGVPLDGRGQIGGELCEMPLERKAPGVIFRQPVNQPLQTGLKSVDAMIPIGRGQRELIIGDRQTGKTSIAIDTILNQKSNYEAGKPVYCIYVAIGQKGSTVASLVNTLRERGAMDYTIVVAATAADPAALQYFAPFAGAAIGEYFRDTGRDALVVYDDLSKQAVAYREVSLILRRPSGREAYPGDIFYLHSRLLERAAKIINQQEVAEQMNDLPPSLKGKVKAGGSLTALPIIETQAGDVSAYIPTNVISITDGQIFLETDLFNQGFRPAINVGISVSRVGGSAQIK…
8083	GC_00001377		PV2SA02	1988	5	5	1	1	0.999748	1	0.999874	COG0056	FoF1-type ATP synthase, alpha subunit (AtpA) (PDB:3OAA)	COG0056	FoF1-type ATP synthase	C	Energy production and conversion	MSENIKPSEVSEVLLQQLKGIDTHLQFDEVGNVLQVSDGVARIYGLRNAEANELLEFENGIMAIVMNLEEDNVGAVLLGPTDQIKEGMVVKRTKRIASINVGEGMLGRVIDPLGVPLDGRGQIGGELCEMPLERKAPGVIFRQPVNQPLQTGLKSVDAMIPIGRGQRELIIGDRQTGKTSIAIDTILNQKSNYEAGKPVYCIYVAIGQKGSTVASLVNTLRERGAMDYTIVVAATAADPAALQYFAPFAGAAIGEYFRDTGRDALVVYDDLSKQAVAYREVSLILRRPSGREAYPGDIFYLHSRLLERAAKIINQQEVAEQMNDLPPSLKGKVKAGGSLTALPIIETQAGDVSAYIPTNVISITDGQIFLETDLFNQGFRPAINVGISVSRVGGSAQIK…
7309	GC_00001223		PV10SA01	2565	5	5	1	1	0.999217	1	0.999608	COG0055	FoF1-type ATP synthase, beta subunit (AtpD) (PDB:3OAA)	COG0055	FoF1-type ATP synthase	C	Energy production and conversion	MSQIIGHISQVIGPVVDVYFEGKGIDTDLLLPSIHDALTIKRNDGRILVVEVQQHIGEDTVRTVAMDSTDGLQRGMEVIPTGHPITMPVGNQIKGRLMNVVGEAVDGMRPLSKEGAFPIHREPPKFDELSTVQEVLFTGIKVIDLLEPYSKGGKIGLFGGAGVGKTVLIMELINNIAKKHNGFSVFAGVGERTREGNDLLREMIESGVIRYGEEFKKSMEEGHWDLSKVDYNEVEKSQATLVYGQMNEPPGARSSIALSGLTVAESFRDRKNGGSNGPRDILFFIDNIFRFTQAGSEVSALLGRMPSAVGYQPTLATEMGQMQERITSTKNGSITSVQAVYVPADDLTDPAPATTFTHLDATTVLSRKITELGIYPAVDPLESTSRILDPLIVGQEHYD…
7310	GC_00001223		PV26FA01	3604	5	5	1	1	0.999217	1	0.999608	COG0055	FoF1-type ATP synthase, beta subunit (AtpD) (PDB:3OAA)	COG0055	FoF1-type ATP synthase	C	Energy production and conversion	MSQIIGHISQVIGPVVDVYFEGKGIDTDLLLPSIHDALTIKRNDGRILVVEVQQHIGEDTVRTVAMDSTDGLQRGMEVIPTGHPITMPVGNQIKGRLMNVVGEAVDGMRPLSKEGAFPIHREPPKFDELSTVQEVLFTGIKVIDLLEPYSKGGKIGLFGGAGVGKTVLIMELINNIAKKHNGFSVFAGVGERTREGNDLLREMIESGVIRYGEEFKKSMEEGHWDLSKVDYNEVEKSQATLVYGQMNEPPGARSSIALSGLTVAESFRDRKNGDSNGPRDILFFIDNIFRFTQAGSEVSALLGRMPSAVGYQPTLATEMGQMQERITSTKNGSITSVQAVYVPADDLTDPAPATTFTHLDATTVLSRKITELGIYPAVDPLESTSRILDPLIVGQEHYD…
7311	GC_00001223		PV29FA01	1029	5	5	1	1	0.999217	1	0.999608	COG0055	FoF1-type ATP synthase, beta subunit (AtpD) (PDB:3OAA)	COG0055	FoF1-type ATP synthase	C	Energy production and conversion	MSQIIGHISQVIGPVVDVYFEGKGIDTDLLLPSIHDALTIKRNDGRILVVEVQQHIGEDTVRTVAMDSTDGLQRGMEVIPTGHPITMPVGNQIKGRLMNVVGEAVDGMRPLSKEGAFPIHREPPKFDELSTVQEVLFTGIKVIDLLEPYSKGGKIGLFGGAGVGKTVLIMELINNIAKKHNGFSVFAGVGERTREGNDLLREMIESGVIRYGEEFKKSMEEGHWDLSKVDYNEVEKSQATLVYGQMNEPPGARSSIALSGLTVAESFRDRKNGDSNGPRDILFFIDNIFRFTQAGSEVSALLGRMPSAVGYQPTLATEMGQMQERITSTKNGSITSVQAVYVPADDLTDPAPATTFTHLDATTVLSRKITELGIYPAVDPLESTSRILDPLIVGQEHYD…
7312	GC_00001223		PV2SA01	1306	5	5	1	1	0.999217	1	0.999608	COG0055	FoF1-type ATP synthase, beta subunit (AtpD) (PDB:3OAA)	COG0055	FoF1-type ATP synthase	C	Energy production and conversion	MSQIIGHISQVIGPVVDVYFEGKGIDTDLLLPSIHDALTIKRNDGRILVVEVQQHIGEDTVRTVAMDSTDGLQRGMEVIPTGHPITMPVGNQIKGRLMNVVGEAVDGMRPLSKEGAFPIHREPPKFDELSTVQEVLFTGIKVIDLLEPYSKGGKIGLFGGAGVGKTVLIMELINNIAKKHNGFSVFAGVGERTREGNDLLREMIESGVIRYGEEFKKSMEEGHWDLSKVDYNEVEKSQATLVYGQMNEPPGARSSIALSGLTVAESFRDRKNGDSNGPRDILFFIDNIFRFTQAGSEVSALLGRMPSAVGYQPTLATEMGQMQERITSTKNGSITSVQAVYVPADDLTDPAPATTFTHLDATTVLSRKITELGIYPAVDPLESTSRILDPLIVGQEHYD…
7313	GC_00001223		PV2SA02	1981	5	5	1	1	0.999217	1	0.999608	COG0055	FoF1-type ATP synthase, beta subunit (AtpD) (PDB:3OAA)	COG0055	FoF1-type ATP synthase	C	Energy production and conversion	MSQIIGHISQVIGPVVDVYFEGKGIDTDLLLPSIHDALTIKRNDGRILVVEVQQHIGEDTVRTVAMDSTDGLQRGMEVIPTGHPITMPVGNQIKGRLMNVVGEAVDGMRPLSKEGAFPIHREPPKFDELSTVQEVLFTGIKVIDLLEPYSKGGKIGLFGGAGVGKTVLIMELINNIAKKHNGFSVFAGVGERTREGNDLLREMIESGVIRYGEEFKKSMEEGHWDLSKVDYNEVEKSQATLVYGQMNEPPGARSSIALSGLTVAESFRDRKNGDSNGPRDILFFIDNIFRFTQAGSEVSALLGRMPSAVGYQPTLATEMGQMQERITSTKNGSITSVQAVYVPADDLTDPAPATTFTHLDATTVLSRKITELGIYPAVDPLESTSRILDPLIVGQEHYD…
5814	GC_00000922		PV10SA01	775	5	5	1	1	1	1	1	COG0039	Malate/lactate dehydrogenase (Mdh) (PDB:4WLO)	COG0039	TCA cycle	C	Energy production and conversion	MEFVTNEKLTIVGAAGMIGSNMAQTAIMMGLTPNICLYDPYAPGLEGVAEELYHCGFEGMNITFTSDIKEALTDAKYIVNSGGAARKAGMTREDLLKGNAAIAEEFGKNVKAYCPDVKHIVVIFNPADITGLITLLYSGLKPSQVTTLAALDSTRLRSELSKHFGIAMDNVENCRTYGGHGEQMAVYASTAKVNGKALLDIIGTDALTKEQWTEIQQKVTKGGANIINLRGRSSFQSPSYVSIEMIAAAMGGKPFRWPAGTYVSNGKFDHIMMAWETSITKDGCHLKEVKGTPEEEAALEKSYAHLCALRDEVIAMGVLPPVSEWNKLNPYIK
5815	GC_00000922		PV26FA01	1204	5	5	1	1	1	1	1	COG0039	Malate/lactate dehydrogenase (Mdh) (PDB:4WLO)	COG0039	TCA cycle	C	Energy production and conversion	MEFVTNEKLTIVGAAGMIGSNMAQTAIMMGLTPNICLYDPYAPGLEGVAEELYHCGFEGMNITFTSDIKEALTDAKYIVNSGGAARKAGMTREDLLKGNAAIAEEFGKNVKAYCPDVKHIVVIFNPADITGLITLLYSGLKPSQVTTLAALDSTRLRSELSKHFGIAMDNVENCRTYGGHGEQMAVYASTAKVNGKALLDIIGTDALTKEQWTEIQQKVTKGGANIINLRGRSSFQSPSYVSIEMIAAAMGGKPFRWPAGTYVSNGKFDHIMMAWETSITKDGCHLKEVKGTPEEEAALEKSYAHLCALRDEVIAMGVLPPVSEWNKLNPYIK
5816	GC_00000922		PV29FA01	2870	5	5	1	1	1	1	1	COG0039	Malate/lactate dehydrogenase (Mdh) (PDB:4WLO)	COG0039	TCA cycle	C	Energy production and conversion	MEFVTNEKLTIVGAAGMIGSNMAQTAIMMGLTPNICLYDPYAPGLEGVAEELYHCGFEGMNITFTSDIKEALTDAKYIVNSGGAARKAGMTREDLLKGNAAIAEEFGKNVKAYCPDVKHIVVIFNPADITGLITLLYSGLKPSQVTTLAALDSTRLRSELSKHFGIAMDNVENCRTYGGHGEQMAVYASTAKVNGKALLDIIGTDALTKEQWTEIQQKVTKGGANIINLRGRSSFQSPSYVSIEMIAAAMGGKPFRWPAGTYVSNGKFDHIMMAWETSITKDGCHLKEVKGTPEEEAALEKSYAHLCALRDEVIAMGVLPPVSEWNKLNPYIK
5817	GC_00000922		PV2SA01	109	5	5	1	1	1	1	1	COG0039	Malate/lactate dehydrogenase (Mdh) (PDB:4WLO)	COG0039	TCA cycle	C	Energy production and conversion	MEFVTNEKLTIVGAAGMIGSNMAQTAIMMGLTPNICLYDPYAPGLEGVAEELYHCGFEGMNITFTSDIKEALTDAKYIVNSGGAARKAGMTREDLLKGNAAIAEEFGKNVKAYCPDVKHIVVIFNPADITGLITLLYSGLKPSQVTTLAALDSTRLRSELSKHFGIAMDNVENCRTYGGHGEQMAVYASTAKVNGKALLDIIGTDALTKEQWTEIQQKVTKGGANIINLRGRSSFQSPSYVSIEMIAAAMGGKPFRWPAGTYVSNGKFDHIMMAWETSITKDGCHLKEVKGTPEEEAALEKSYAHLCALRDEVIAMGVLPPVSEWNKLNPYIK
5818	GC_00000922		PV2SA02	784	5	5	1	1	1	1	1	COG0039	Malate/lactate dehydrogenase (Mdh) (PDB:4WLO)	COG0039	TCA cycle	C	Energy production and conversion	MEFVTNEKLTIVGAAGMIGSNMAQTAIMMGLTPNICLYDPYAPGLEGVAEELYHCGFEGMNITFTSDIKEALTDAKYIVNSGGAARKAGMTREDLLKGNAAIAEEFGKNVKAYCPDVKHIVVIFNPADITGLITLLYSGLKPSQVTTLAALDSTRLRSELSKHFGIAMDNVENCRTYGGHGEQMAVYASTAKVNGKALLDIIGTDALTKEQWTEIQQKVTKGGANIINLRGRSSFQSPSYVSIEMIAAAMGGKPFRWPAGTYVSNGKFDHIMMAWETSITKDGCHLKEVKGTPEEEAALEKSYAHLCALRDEVIAMGVLPPVSEWNKLNPYIK
9754	GC_00001712		PV10SA01	1091	5	5	1	1	0.998296	1	0.999147	COG0039	Malate/lactate dehydrogenase (Mdh) (PDB:4WLO)	COG0039	TCA cycle	C	Energy production and conversion	MSKVTVVGAGNVGATCANVLAFNEVADEVVMLDVKEGVSEGKAMDMMQTAQLLGFDTNIVGCTNDYEKTANSDVVVITSGIPRKPGMTREELIGVNAGIVKSVAQNILKYSPNAIIVVISNPMDTMTYLSLKALGLPKNRIIGMGGALDSSRFKYFLSQALGCNANEVEGMVIGGHGDTTMIPLTRFATYKGMPVSNFLSEEKLQEVAAATMVGGATLTKLLNTSAWYAPGAAGAFVVESIIHNQGKMVPCSVYLEGEYGESDICCGVPVILGKNGIEKIVELPLNEEEKAKFAASAAAVRKTNAALHEVGAL
9755	GC_00001712		PV26FA01	986	5	5	1	1	0.998296	1	0.999147	COG0039	Malate/lactate dehydrogenase (Mdh) (PDB:4WLO)	COG0039	TCA cycle	C	Energy production and conversion	MSKVTVVGAGNVGATCANVLAFNEVADEVVMLDVKEGVSEGKAMDMMQTAQLLGFDTNIVGCTNDYEKTANSDVVVITSGIPRKPGMTREELIGVNAGIVKSVAQNILKHSPNAIIVVISNPMDTMTYLSLKALGLPKNRIIGMGGALDSSRFKYFLSQALGCNANEVEGMVIGGHGDTTMIPLTRFATYKGMPVSNFLSEEKLQEVAAATMVGGATLTKLLGTSAWYAPGAAGAFVVESIIHNQGKMVPCSVYLEGEYGESDICCGVPVILGKNGIEKIVELPLNEEEKAKFAASAAAVRKTNAALHEVGAL
9756	GC_00001712		PV29FA01	2603	5	5	1	1	0.998296	1	0.999147	COG0039	Malate/lactate dehydrogenase (Mdh) (PDB:4WLO)	COG0039	TCA cycle	C	Energy production and conversion	MSKVTVVGAGNVGATCANVLAFNEVADEVVMLDVKEGVSEGKAMDMMQTAQLLGFDTNIVGCTNDYEKTANSDVVVITSGIPRKPGMTREELIGVNAGIVKSVAQNILKYSPNAIIVVISNPMDTMTYLSLKALGLPKNRIIGMGGALDSSRFKYFLSQALGCNANEVEGMVIGGHGDTTMIPLTRFATYKGMPVSNFLSEEKLQEVAAATMVGGATLTKLLGTSAWYAPGAAGAFVVESIIHNQGKMVPCSVYLEGEYGESDICCGVPVILGKNGIEKIVELPLNEEEKAKFAASAAAVRKTNAALHEVGAL
9757	GC_00001712		PV2SA01	378	5	5	1	1	0.998296	1	0.999147	COG0039	Malate/lactate dehydrogenase (Mdh) (PDB:4WLO)	COG0039	TCA cycle	C	Energy production and conversion	MSKVTVVGAGNVGATCANVLAFNEVADEVVMLDVKEGVSEGKAMDMMQTAQLLGFDTNIVGCTNDYEKTANSDVVVITSGIPRKPGMTREELIGVNAGIVKSVAQNILKYSPNAIIVVISNPMDTMTYLSLKALGLPKNRIIGMGGALDSSRFKYFLSQALGCNANEVEGMVIGGHGDTTMIPLTRFATYKGMPVSNFLSEEKLQEVAAATMVGGATLTKLLGTSAWYAPGAAGAFVVESIIHNQGKMVPCSVYLEGEYGESDICCGVPVILGKNGIEKIVELPLNEEEKAKFAASAAAVRKTNAALHEVGAL
9758	GC_00001712		PV2SA02	1053	5	5	1	1	0.998296	1	0.999147	COG0039	Malate/lactate dehydrogenase (Mdh) (PDB:4WLO)	COG0039	TCA cycle	C	Energy production and conversion	MSKVTVVGAGNVGATCANVLAFNEVADEVVMLDVKEGVSEGKAMDMMQTAQLLGFDTNIVGCTNDYEKTANSDVVVITSGIPRKPGMTREELIGVNAGIVKSVAQNILKYSPNAIIVVISNPMDTMTYLSLKALGLPKNRIIGMGGALDSSRFKYFLSQALGCNANEVEGMVIGGHGDTTMIPLTRFATYKGMPVSNFLSEEKLQEVAAATMVGGATLTKLLGTSAWYAPGAAGAFVVESIIHNQGKMVPCSVYLEGEYGESDICCGVPVILGKNGIEKIVELPLNEEEKAKFAASAAAVRKTNAALHEVGAL
1849	GC_00000147		PV10SA01	2543	5	7	2	0	0.758709	0.648808	0.699468	COG1979	Alcohol dehydrogenase YqhD, Fe-dependent ADH family (YqdH) (PDB:1OJ7)			C	Energy production and conversion	MNNFVFYSPTEFVFGKDTDIQTGTLAKKYNARKAMIVYGGGSIIRSGLLQRIEDSLQQAGVDYVKLGGVQPNPTDPKVYEGIELARKEGVDFMLPVGGGSVIDTAKAIAAGVPYEGDFWDFYIGKAKVKKALKVGVVLTIPAAGSEGSGNTVITKLEGLQKLSLRVPELLRPVFAVMNPELTYTLPPYQTACGIADMMVHIMERYFTNTPDVEISDRLCEGTLMAIIKEAYKVKQNPNDYEARANIMWCGTIAHNGTCGVGCEE--DWASHFLEHEISAVYNVTHGAGLAVIVPA----------------------WMTFMAEHNPKKIARFANRVFGVPEN-------------EDLEEMALAGISRLKHFFRYMG------LPVNFKELGIEHPDI…
1850	GC_00000147		PV26FA01	3626	5	7	2	0	0.758709	0.648808	0.699468	COG1979	Alcohol dehydrogenase YqhD, Fe-dependent ADH family (YqdH) (PDB:1OJ7)			C	Energy production and conversion	MNNFVFYSPTEFVFGKDTEIQTGTLAKKYNARKAMIVYGGGSIIRSGLLQRIEDSLQQAGVDYVKLGGVQPNPTDPKVYEGIELARKEGVDFMLPVGGGSVIDTAKAIAAGVPYEGDFWDFYIGKAKVKKALKVGVVLTIPAAGSEGSGNTVITKLEGLQKLSLRVPELLRPVFAVMNPELTYTLPPYQTACGIADMMVHIMERYFTNTPDVEISDRLCEGTLMAIIKEAYKVKQNPNDYEARANIMWCGTIAHNGTCGVGCEE--DWASHFLEHEISAVYNVTHGAGLAVIVPA----------------------WMTFMAEHNPKKIARFANRVFGVPEN-------------EDLEEMALAGISRLKHFFRYMG------LPVNFKELGIEHPDI…
1851	GC_00000147		PV29FA01	1051	5	7	2	0	0.758709	0.648808	0.699468	COG1979	Alcohol dehydrogenase YqhD, Fe-dependent ADH family (YqdH) (PDB:1OJ7)			C	Energy production and conversion	MNNFVFYSPTEFVFGKDTEIQTGTLAKKYNARKAMIVYGGGSIIRSGLLQRIEDSLQQAGVDYVKLGGVQPNPTDPKVYEGIELARKEGVDFMLPVGGGSVIDTAKAIAAGVPYEGDFWDFYIGKAKVKKALKVGVVLTIPAAGSEGSGNTVITKLEGLQKLSLRVPELLRPVFAVMNPELTYTLPPYQTACGIADMMVHIMERYFTNTPDVEISDRLCEGTLMAIIKEAYKVKQNPNDYEARANIMWCGTIAHNGTCGVGCEE--DWASHFLEHEISAVYNVTHGAGLAVIVPA----------------------WMTFMAEHNPKKIARFANRVFGVPEN-------------EDLEEMALAGISRLKHFFRYMG------LPVNFKELGIEHPDI…
1852	GC_00000147		PV2SA01	1330	5	7	2	0	0.758709	0.648808	0.699468	COG1979	Alcohol dehydrogenase YqhD, Fe-dependent ADH family (YqdH) (PDB:1OJ7)			C	Energy production and conversion	MNNFVFYSPTEFVFGKDTDIQTGTLAKKYNARKAMIVYGGGSIIRSGLLQRIEDSLQ-------------------------------------------------------------------------------------------------------------------------------------------------------------------------------------------------------QAGVDYVKLGGVQPNPTDPKVYEGIELARKEGVDFMLPVGGGSVIDTAKAIAAGVPYEGDFWDFYIGKAKVKKALK-VGVVLTIPAAGSEGSGNTVITKLEGLQKLSLRVPELLRPVFAVMNPELTYTLPPYQTACGIADMMV…
1853	GC_00000147		PV2SA01	1329	5	7	2	0	0.758709	0.648808	0.699468	COG1979	Alcohol dehydrogenase YqhD, Fe-dependent ADH family (YqdH) (PDB:1OJ7)			C	Energy production and conversion	MKQ----NPND-----------------YEARANIMWC--GTIAHNG-----------------------------------------------------------------------------------------------------------------------------------------------------------------------------------------------------------------TCGVGCEE--DWASHFLEHEISAVYNVTHGAGLAVIVPA----------------------WMTFMAEHNPKKIARFANRVFGVPEN-------------EDLEEMALAGISRLKHFFRYMG------LPVNFKELGIEHPDI…
1854	GC_00000147		PV2SA02	2005	5	7	2	0	0.758709	0.648808	0.699468	COG1979	Alcohol dehydrogenase YqhD, Fe-dependent ADH family (YqdH) (PDB:1OJ7)			C	Energy production and conversion	MNNFVFYSPTEFVFGKDTDIQTGTLAKKYNARKAMIVYGGGSIIRSGLLQRIEDSLQ-------------------------------------------------------------------------------------------------------------------------------------------------------------------------------------------------------QAGVDYVKLGGVQPNPTDPKVYEGIELARKEGVDFMLPVGGGSVIDTAKAIAAGVPYEGDFWDFYIGKAKVKKALK-VGVVLTIPAAGSEGSGNTVITKLEGLQKLSLRVPELLRPVFAVMNPELTYTLPPYQTACGIADMMV…
1855	GC_00000147		PV2SA02	2004	5	7	2	0	0.758709	0.648808	0.699468	COG1979	Alcohol dehydrogenase YqhD, Fe-dependent ADH family (YqdH) (PDB:1OJ7)			C	Energy production and conversion	MKQ----NPND-----------------YEARANIMWC--GTIAHNG-----------------------------------------------------------------------------------------------------------------------------------------------------------------------------------------------------------------TCGVGCEE--DWASHFLEHEISAVYNVTHGAGLAVIVPA----------------------WMTFMAEHNPKKIARFANRVFGVPEN-------------EDLEEMALAGISRLKHFFRYMG------LPVNFKELGIEHPDI…
1967	GC_00000165		PV10SA01	3932	5	6	2	0	0.973783	0.814576	0.887093	COG0546	Phosphoglycolate phosphatase, HAD superfamily (Gph) (PDB:2NYV)			C	Energy production and conversion	MIKLVAFDLDGTIGDTIPMCLKALKKAVTPY-VTLNDVSENDILETFGLNEKGMIKKLVGYNWENALDDFYVIYEQMHIMCPRPFDGITELIEKLKKKSILIALVTGKGEKSCAITLRQFNMDTCFDKVKTGNPFKNNKAENFRELLADYKLQPDEMIYIGDTVSDIVSCREVGIRCLSASWITSCLDAQKLEAHNAGNVFYSIASLECYLMG
1968	GC_00000165		PV26FA01	2276	5	6	2	0	0.973783	0.814576	0.887093	COG0546	Phosphoglycolate phosphatase, HAD superfamily (Gph) (PDB:2NYV)			C	Energy production and conversion	#NAME?
1969	GC_00000165		PV26FA01	2273	5	6	2	0	0.973783	0.814576	0.887093	COG0546	Phosphoglycolate phosphatase, HAD superfamily (Gph) (PDB:2NYV)			C	Energy production and conversion	MIKLVAFDLDGTIGDTIPMCLKALKKAVTPY-VTL----------------------------------------------------------------------------------------------------------------------------------------------------------------------------------
1970	GC_00000165		PV29FA01	3200	5	6	2	0	0.973783	0.814576	0.887093	COG0546	Phosphoglycolate phosphatase, HAD superfamily (Gph) (PDB:2NYV)			C	Energy production and conversion	MIKLVAFDLDGTIGDTIPMCLKALKKAVTPY-VTLNDVSENDILETFGLNEKGMIKKLVGYNWENALDDFYVIYEQMHIMCPRPFDGITELIEKLKKKSILIALVTGKGEKSCAITLRQFNMDTCFDKVKTGNPFKNNKAENFRELLADYKLQPDEMIYIGDTVSDIVSCREVGIRCLSASWITSCLDAQKLEAHNAGNVFYSIASLECYLMG
1971	GC_00000165		PV2SA01	3242	5	6	2	0	0.973783	0.814576	0.887093	COG0546	Phosphoglycolate phosphatase, HAD superfamily (Gph) (PDB:2NYV)			C	Energy production and conversion	MIKLVAFDLDGTIGDTIPMCLKALKKAVTPY-VTLNDVSENDILETFGLNEKGMIKKLVGYNWENALDDFYVIYEQMHIMCPRPFDGITELIEKLKKKSILIALVTGKGEKSCAITLRQFNMDTCFDKVKTGNPFKNNKAENFRELLADYKLQPDEMIYIGDTVSDIVSCREVGIRCLSASWITSCLDAQKLEAHNAGNVFYSIASLECYLMG
1972	GC_00000165		PV2SA02	3917	5	6	2	0	0.973783	0.814576	0.887093	COG0546	Phosphoglycolate phosphatase, HAD superfamily (Gph) (PDB:2NYV)			C	Energy production and conversion	MIKLVAFDLDGTIGDTIPMCLKALKKAVTPY-VTLNDVSENDILETFGLNEKGMIKKLVGYNWENALDDFYVIYEQMHIMCPRPFDGITELIEKLKKKSILIALVTGKGEKSCAITLRQFNMDTCFDKVKTGNPFKNNKAENFRELLADYKLQPDEMIYIGDTVSDIVSCREVGIRCLSASWITSCLDAQKLEAHNAGNVFYSIASLECYLMG
2894	GC_00000338		PV10SA01	489	5	5	1	1	1	1	1	COG1592	Rubrerythrin (YotD) (PDB:1B71)			C	Energy production and conversion	MAKSVKGTQTEKNLLTSFAGESQARMRYTYFASTAKKEGYEQIAAIFTETADQEKEHAKRMFKWLEGGMVEITASYPAGIIGTTMENLKAAAAGENEEWTTDYPHFADVADQEGFPAIATMYRRIAEAEKGHEERYLALLKNVEEGTVFKKAEETVWQCRNCGYIYVGTEAPEVCPACLHPQAYFEVKKNNY
2895	GC_00000338		PV26FA01	1895	5	5	1	1	1	1	1	COG1592	Rubrerythrin (YotD) (PDB:1B71)			C	Energy production and conversion	MAKSVKGTQTEKNLLTSFAGESQARMRYTYFASTAKKEGYEQIAAIFTETADQEKEHAKRMFKWLEGGMVEITASYPAGIIGTTMENLKAAAAGENEEWTTDYPHFADVADQEGFPAIATMYRRIAEAEKGHEERYLALLKNVEEGTVFKKAEETVWQCRNCGYIYVGTEAPEVCPACLHPQAYFEVKKNNY
2896	GC_00000338		PV29FA01	3595	5	5	1	1	1	1	1	COG1592	Rubrerythrin (YotD) (PDB:1B71)			C	Energy production and conversion	MAKSVKGTQTEKNLLTSFAGESQARMRYTYFASTAKKEGYEQIAAIFTETADQEKEHAKRMFKWLEGGMVEITASYPAGIIGTTMENLKAAAAGENEEWTTDYPHFADVADQEGFPAIATMYRRIAEAEKGHEERYLALLKNVEEGTVFKKAEETVWQCRNCGYIYVGTEAPEVCPACLHPQAYFEVKKNNY
2897	GC_00000338		PV2SA01	4000	5	5	1	1	1	1	1	COG1592	Rubrerythrin (YotD) (PDB:1B71)			C	Energy production and conversion	MAKSVKGTQTEKNLLTSFAGESQARMRYTYFASTAKKEGYEQIAAIFTETADQEKEHAKRMFKWLEGGMVEITASYPAGIIGTTMENLKAAAAGENEEWTTDYPHFADVADQEGFPAIATMYRRIAEAEKGHEERYLALLKNVEEGTVFKKAEETVWQCRNCGYIYVGTEAPEVCPACLHPQAYFEVKKNNY
2898	GC_00000338		PV2SA02	11	5	5	1	1	1	1	1	COG1592	Rubrerythrin (YotD) (PDB:1B71)			C	Energy production and conversion	MAKSVKGTQTEKNLLTSFAGESQARMRYTYFASTAKKEGYEQIAAIFTETADQEKEHAKRMFKWLEGGMVEITASYPAGIIGTTMENLKAAAAGENEEWTTDYPHFADVADQEGFPAIATMYRRIAEAEKGHEERYLALLKNVEEGTVFKKAEETVWQCRNCGYIYVGTEAPEVCPACLHPQAYFEVKKNNY
2899	GC_00000339		PV10SA01	509	5	5	1	1	1	1	1	COG0427	Propionyl CoA:succinate CoA transferase (ACH1) (PDB:2G39) (PUBMED:10769117)			C	Energy production and conversion	MGFNIISAAEAASYIKHGYNIGLSGFTPAGTPKAVTPEVAKIAEEEHAKGNPFQISIFTGASTGDATDGILSRVKAIRYRAPYTTNPDFRKAVNNGEIAYNDIHLSQMAQEVRYGFMGKVDVAILEACEITPDGKVYLTAAGGIAPTIARLADKVIIELNAAHSKNGMGLHDVYEPLDPPYRREIPIYKPSDRIGLPYVQVDPKKIIGVVEVNTPDQARSFTAPDPITDQIGQNVADFLAADMKRGIIPASFLPLQSGVGNIANAVLGALGRDKTIPAFEMYTEVLQDAVVDLIRQGRVKFGSTCSLTVTNECLQGIYDDIDFFRDKLVMRPSEISNNPEIIRRLGVISINTAIEADIYGNVNSTHISGTKMMNGIGGSGDFTRNAYISIFTCPSVAKE…
2900	GC_00000339		PV26FA01	1923	5	5	1	1	1	1	1	COG0427	Propionyl CoA:succinate CoA transferase (ACH1) (PDB:2G39) (PUBMED:10769117)			C	Energy production and conversion	MGFNIISAAEAASYIKHGYNIGLSGFTPAGTPKAVTPEVAKIAEEEHAKGNPFQISIFTGASTGDATDGILSRVKAIRYRAPYTTNPDFRKAVNNGEIAYNDIHLSQMAQEVRYGFMGKVDVAILEACEITPDGKVYLTAAGGIAPTIARLADKVIIELNAAHSKNGMGLHDVYEPLDPPYRREIPIYKPSDRIGLPYVQVDPKKIIGVVEVNTPDQARSFTAPDPITDQIGQNVADFLAADMKRGIIPASFLPLQSGVGNIANAVLGALGRDKTIPAFEMYTEVLQDAVVDLIRQGRVKFGSTCSLTVTNECLQGIYDDIDFFRDKLVMRPSEISNNPEIIRRLGVISINTAIEADIYGNVNSTHISGTKMMNGIGGSGDFTRNAYISIFTCPSVAKE…
2901	GC_00000339		PV29FA01	3567	5	5	1	1	1	1	1	COG0427	Propionyl CoA:succinate CoA transferase (ACH1) (PDB:2G39) (PUBMED:10769117)			C	Energy production and conversion	MGFNIISAAEAASYIKHGYNIGLSGFTPAGTPKAVTPEVAKIAEEEHAKGNPFQISIFTGASTGDATDGILSRVKAIRYRAPYTTNPDFRKAVNNGEIAYNDIHLSQMAQEVRYGFMGKVDVAILEACEITPDGKVYLTAAGGIAPTIARLADKVIIELNAAHSKNGMGLHDVYEPLDPPYRREIPIYKPSDRIGLPYVQVDPKKIIGVVEVNTPDQARSFTAPDPITDQIGQNVADFLAADMKRGIIPASFLPLQSGVGNIANAVLGALGRDKTIPAFEMYTEVLQDAVVDLIRQGRVKFGSTCSLTVTNECLQGIYDDIDFFRDKLVMRPSEISNNPEIIRRLGVISINTAIEADIYGNVNSTHISGTKMMNGIGGSGDFTRNAYISIFTCPSVAKE…
2902	GC_00000339		PV2SA01	4028	5	5	1	1	1	1	1	COG0427	Propionyl CoA:succinate CoA transferase (ACH1) (PDB:2G39) (PUBMED:10769117)			C	Energy production and conversion	MGFNIISAAEAASYIKHGYNIGLSGFTPAGTPKAVTPEVAKIAEEEHAKGNPFQISIFTGASTGDATDGILSRVKAIRYRAPYTTNPDFRKAVNNGEIAYNDIHLSQMAQEVRYGFMGKVDVAILEACEITPDGKVYLTAAGGIAPTIARLADKVIIELNAAHSKNGMGLHDVYEPLDPPYRREIPIYKPSDRIGLPYVQVDPKKIIGVVEVNTPDQARSFTAPDPITDQIGQNVADFLAADMKRGIIPASFLPLQSGVGNIANAVLGALGRDKTIPAFEMYTEVLQDAVVDLIRQGRVKFGSTCSLTVTNECLQGIYDDIDFFRDKLVMRPSEISNNPEIIRRLGVISINTAIEADIYGNVNSTHISGTKMMNGIGGSGDFTRNAYISIFTCPSVAKE…
2903	GC_00000339		PV2SA02	39	5	5	1	1	1	1	1	COG0427	Propionyl CoA:succinate CoA transferase (ACH1) (PDB:2G39) (PUBMED:10769117)			C	Energy production and conversion	MGFNIISAAEAASYIKHGYNIGLSGFTPAGTPKAVTPEVAKIAEEEHAKGNPFQISIFTGASTGDATDGILSRVKAIRYRAPYTTNPDFRKAVNNGEIAYNDIHLSQMAQEVRYGFMGKVDVAILEACEITPDGKVYLTAAGGIAPTIARLADKVIIELNAAHSKNGMGLHDVYEPLDPPYRREIPIYKPSDRIGLPYVQVDPKKIIGVVEVNTPDQARSFTAPDPITDQIGQNVADFLAADMKRGIIPASFLPLQSGVGNIANAVLGALGRDKTIPAFEMYTEVLQDAVVDLIRQGRVKFGSTCSLTVTNECLQGIYDDIDFFRDKLVMRPSEISNNPEIIRRLGVISINTAIEADIYGNVNSTHISGTKMMNGIGGSGDFTRNAYISIFTCPSVAKE…
3009	GC_00000361		PV10SA01	4142	5	5	1	1	1	1	1	COG3426	Butyrate kinase (Buk) (PDB:1SAZ)			C	Energy production and conversion	MKIFVINPGSTSTKIALFIDEKPVWAAGAHHTADDLSEFHHVNEQYAYRKDFVLRLLAEADIPLDFDAVIARGGLLKPTPGGVYAINEQMKHDLLNARMEHACNLGALIADEIARECHCPAYIADPEVVDELQPAARLTGIPEIERISIFHALNSKAVSRKYAASIGKHYEELNLIVVHLGGGISVGAHCKGRVIDVNNALNGEGPFSPERAGTIPADQLAELCFSGKYTLKQIKKMLNGKGGLTAHLGMNDVVTIARKASEGEEPYKGVLDAMLYTVAKQAGAMYVTLRGQVDAIILTGGIAHSDYCVGILKEQIDYLAPVVLMPGEDEMGSLAYNALGALKGELPLQVYRPE
3010	GC_00000361		PV26FA01	2078	5	5	1	1	1	1	1	COG3426	Butyrate kinase (Buk) (PDB:1SAZ)			C	Energy production and conversion	MKIFVINPGSTSTKIALFIDEKPVWAAGAHHTADDLSEFHHVNEQYAYRKDFVLRLLAEADIPLDFDAVIARGGLLKPTPGGVYAINEQMKHDLLNARMEHACNLGALIADEIARECHCPAYIADPEVVDELQPAARLTGIPEIERISIFHALNSKAVSRKYAASIGKHYEELNLIVVHLGGGISVGAHCKGRVIDVNNALNGEGPFSPERAGTIPADQLAELCFSGKYTLKQIKKMLNGKGGLTAHLGMNDVVTIARKASEGEEPYKGVLDAMLYTVAKQAGAMYVTLRGQVDAIILTGGIAHSDYCVGILKEQIDYLAPVVLMPGEDEMGSLAYNALGALKGELPLQVYRPE
3011	GC_00000361		PV29FA01	3389	5	5	1	1	1	1	1	COG3426	Butyrate kinase (Buk) (PDB:1SAZ)			C	Energy production and conversion	MKIFVINPGSTSTKIALFIDEKPVWAAGAHHTADDLSEFHHVNEQYAYRKDFVLRLLAEADIPLDFDAVIARGGLLKPTPGGVYAINEQMKHDLLNARMEHACNLGALIADEIARECHCPAYIADPEVVDELQPAARLTGIPEIERISIFHALNSKAVSRKYAASIGKHYEELNLIVVHLGGGISVGAHCKGRVIDVNNALNGEGPFSPERAGTIPADQLAELCFSGKYTLKQIKKMLNGKGGLTAHLGMNDVVTIARKASEGEEPYKGVLDAMLYTVAKQAGAMYVTLRGQVDAIILTGGIAHSDYCVGILKEQIDYLAPVVLMPGEDEMGSLAYNALGALKGELPLQVYRPE
3012	GC_00000361		PV2SA01	3439	5	5	1	1	1	1	1	COG3426	Butyrate kinase (Buk) (PDB:1SAZ)			C	Energy production and conversion	MKIFVINPGSTSTKIALFIDEKPVWAAGAHHTADDLSEFHHVNEQYAYRKDFVLRLLAEADIPLDFDAVIARGGLLKPTPGGVYAINEQMKHDLLNARMEHACNLGALIADEIARECHCPAYIADPEVVDELQPAARLTGIPEIERISIFHALNSKAVSRKYAASIGKHYEELNLIVVHLGGGISVGAHCKGRVIDVNNALNGEGPFSPERAGTIPADQLAELCFSGKYTLKQIKKMLNGKGGLTAHLGMNDVVTIARKASEGEEPYKGVLDAMLYTVAKQAGAMYVTLRGQVDAIILTGGIAHSDYCVGILKEQIDYLAPVVLMPGEDEMGSLAYNALGALKGELPLQVYRPE
3013	GC_00000361		PV2SA02	4114	5	5	1	1	1	1	1	COG3426	Butyrate kinase (Buk) (PDB:1SAZ)			C	Energy production and conversion	MKIFVINPGSTSTKIALFIDEKPVWAAGAHHTADDLSEFHHVNEQYAYRKDFVLRLLAEADIPLDFDAVIARGGLLKPTPGGVYAINEQMKHDLLNARMEHACNLGALIADEIARECHCPAYIADPEVVDELQPAARLTGIPEIERISIFHALNSKAVSRKYAASIGKHYEELNLIVVHLGGGISVGAHCKGRVIDVNNALNGEGPFSPERAGTIPADQLAELCFSGKYTLKQIKKMLNGKGGLTAHLGMNDVVTIARKASEGEEPYKGVLDAMLYTVAKQAGAMYVTLRGQVDAIILTGGIAHSDYCVGILKEQIDYLAPVVLMPGEDEMGSLAYNALGALKGELPLQVYRPE
3699	GC_00000499		PV10SA01	722	5	5	1	1	1	1	1	COG0280	Phosphotransacetylase (includes Pta, EutD and phosphobutyryltransferase) (Pta) (PDB:1QZT) (PUBMED:28754323)			C	Energy production and conversion	MDLISQIVERAKANKQRIVLPEGTEERTLKAANQILTDGVADLILLGNPDEIMSLAKQWGLGNIGKATIIDPTDHPKKEEYAQLLCELRKKKGMTIEEARKLVVDPLYLGCLIIKAGDADGQLAGARNTTGNVLRPALQIIKTTPGITCVSGAMLLLTHAPEYGNNGVIVMGDVAVTPVPDANQLAQIAVCTAQTAKAVAGIDPRVAMLSFSTKGSAKHEVVDKVVEALAIAKEMAPDLKIDGELQADAALVPHIGASKAPGSEIAGKANVLVVPCLEVGNISYKLVERLGHATAIGPILQGIARPVNDLSRGCSIDDVYKMIAITANQAIAAKENK
3700	GC_00000499		PV26FA01	1254	5	5	1	1	1	1	1	COG0280	Phosphotransacetylase (includes Pta, EutD and phosphobutyryltransferase) (Pta) (PDB:1QZT) (PUBMED:28754323)			C	Energy production and conversion	MDLISQIVERAKANKQRIVLPEGTEERTLKAANQILTDGVADLILLGNPDEIMSLAKQWGLGNIGKATIIDPTDHPKKEEYAQLLCELRKKKGMTIEEARKLVVDPLYLGCLIIKAGDADGQLAGARNTTGNVLRPALQIIKTTPGITCVSGAMLLLTHAPEYGNNGVIVMGDVAVTPVPDANQLAQIAVCTAQTAKAVAGIDPRVAMLSFSTKGSAKHEVVDKVVEALAIAKEMAPDLKIDGELQADAALVPHIGASKAPGSEIAGKANVLVVPCLEVGNISYKLVERLGHATAIGPILQGIARPVNDLSRGCSIDDVYKMIAITANQAIAAKENK
3701	GC_00000499		PV29FA01	2929	5	5	1	1	1	1	1	COG0280	Phosphotransacetylase (includes Pta, EutD and phosphobutyryltransferase) (Pta) (PDB:1QZT) (PUBMED:28754323)			C	Energy production and conversion	MDLISQIVERAKANKQRIVLPEGTEERTLKAANQILTDGVADLILLGNPDEIMSLAKQWGLGNIGKATIIDPTDHPKKEEYAQLLCELRKKKGMTIEEARKLVVDPLYLGCLIIKAGDADGQLAGARNTTGNVLRPALQIIKTTPGITCVSGAMLLLTHAPEYGNNGVIVMGDVAVTPVPDANQLAQIAVCTAQTAKAVAGIDPRVAMLSFSTKGSAKHEVVDKVVEALAIAKEMAPDLKIDGELQADAALVPHIGASKAPGSEIAGKANVLVVPCLEVGNISYKLVERLGHATAIGPILQGIARPVNDLSRGCSIDDVYKMIAITANQAIAAKENK
3702	GC_00000499		PV2SA01	56	5	5	1	1	1	1	1	COG0280	Phosphotransacetylase (includes Pta, EutD and phosphobutyryltransferase) (Pta) (PDB:1QZT) (PUBMED:28754323)			C	Energy production and conversion	MDLISQIVERAKANKQRIVLPEGTEERTLKAANQILTDGVADLILLGNPDEIMSLAKQWGLGNIGKATIIDPTDHPKKEEYAQLLCELRKKKGMTIEEARKLVVDPLYLGCLIIKAGDADGQLAGARNTTGNVLRPALQIIKTTPGITCVSGAMLLLTHAPEYGNNGVIVMGDVAVTPVPDANQLAQIAVCTAQTAKAVAGIDPRVAMLSFSTKGSAKHEVVDKVVEALAIAKEMAPDLKIDGELQADAALVPHIGASKAPGSEIAGKANVLVVPCLEVGNISYKLVERLGHATAIGPILQGIARPVNDLSRGCSIDDVYKMIAITANQAIAAKENK
3703	GC_00000499		PV2SA02	731	5	5	1	1	1	1	1	COG0280	Phosphotransacetylase (includes Pta, EutD and phosphobutyryltransferase) (Pta) (PDB:1QZT) (PUBMED:28754323)			C	Energy production and conversion	MDLISQIVERAKANKQRIVLPEGTEERTLKAANQILTDGVADLILLGNPDEIMSLAKQWGLGNIGKATIIDPTDHPKKEEYAQLLCELRKKKGMTIEEARKLVVDPLYLGCLIIKAGDADGQLAGARNTTGNVLRPALQIIKTTPGITCVSGAMLLLTHAPEYGNNGVIVMGDVAVTPVPDANQLAQIAVCTAQTAKAVAGIDPRVAMLSFSTKGSAKHEVVDKVVEALAIAKEMAPDLKIDGELQADAALVPHIGASKAPGSEIAGKANVLVVPCLEVGNISYKLVERLGHATAIGPILQGIARPVNDLSRGCSIDDVYKMIAITANQAIAAKENK
3994	GC_00000558		PV10SA01	1629	5	5	1	1	1	1	1	COG1359	Quinol monooxygenase YgiN (YgiN) (PDB:1R6Y) (PUBMED:15613473)			C	Energy production and conversion	MIRLNVFIQVNESNRNAVLETAKELVAQSLNDKGCIAYDIFESATRKDVLMICETWKDAESLDAHEKAAHFITLVPKLQELGKMKLEKFEF
3995	GC_00000558		PV26FA01	403	5	5	1	1	1	1	1	COG1359	Quinol monooxygenase YgiN (YgiN) (PDB:1R6Y) (PUBMED:15613473)			C	Energy production and conversion	MIRLNVFIQVNESNRNAVLETAKELVAQSLNDKGCIAYDIFESATRKDVLMICETWKDAESLDAHEKAAHFITLVPKLQELGKMKLEKFEF
3996	GC_00000558		PV29FA01	1900	5	5	1	1	1	1	1	COG1359	Quinol monooxygenase YgiN (YgiN) (PDB:1R6Y) (PUBMED:15613473)			C	Energy production and conversion	MIRLNVFIQVNESNRNAVLETAKELVAQSLNDKGCIAYDIFESATRKDVLMICETWKDAESLDAHEKAAHFITLVPKLQELGKMKLEKFEF
3997	GC_00000558		PV2SA01	1020	5	5	1	1	1	1	1	COG1359	Quinol monooxygenase YgiN (YgiN) (PDB:1R6Y) (PUBMED:15613473)			C	Energy production and conversion	MIRLNVFIQVNESNRNAVLETAKELVAQSLNDKGCIAYDIFESATRKDVLMICETWKDAESLDAHEKAAHFITLVPKLQELGKMKLEKFEF
3998	GC_00000558		PV2SA02	1695	5	5	1	1	1	1	1	COG1359	Quinol monooxygenase YgiN (YgiN) (PDB:1R6Y) (PUBMED:15613473)			C	Energy production and conversion	MIRLNVFIQVNESNRNAVLETAKELVAQSLNDKGCIAYDIFESATRKDVLMICETWKDAESLDAHEKAAHFITLVPKLQELGKMKLEKFEF
4039	GC_00000567		PV10SA01	2186	5	5	1	1	1	1	1	COG0388	Omega-amidase YafV/Nit2, hydrolyzes alpha-ketoglutaramate (Nit2) (PUBMED:28373563)			C	Energy production and conversion	MKRTIKVGIIQQTCTNDIRHNLSKLHHNIEQVAAAGAQLVVLQELHNTPYFCQTEDTDMFDLAEPVPGPSTGFYSELAAGYGIVLVTSLFEKRAPGLYHNTAVVFDKDGSIAGKYRKMHIPDDPAYYEKFYFTPGDLGFEPIQTSLGKLGVQVCWDQWYPEGARLMALKGAEILIYPTAIGWESTDTQEEKIRQLGAWVTVQRGHAVANGLPVIAVNRVGHEPDPSGQTNGIQFWGNSFVAGPQGEILAQASNMDEENMVVELDMTRSENVRRWWPFLRDRRIDEFENLTRRFID
4040	GC_00000567		PV26FA01	3804	5	5	1	1	1	1	1	COG0388	Omega-amidase YafV/Nit2, hydrolyzes alpha-ketoglutaramate (Nit2) (PUBMED:28373563)			C	Energy production and conversion	MKRTIKVGIIQQTCTNDIRHNLSKLHHNIEQVAAAGAQLVVLQELHNTPYFCQTEDTDMFDLAEPVPGPSTGFYSELAAGYGIVLVTSLFEKRAPGLYHNTAVVFDKDGSIAGKYRKMHIPDDPAYYEKFYFTPGDLGFEPIQTSLGKLGVQVCWDQWYPEGARLMALKGAEILIYPTAIGWESTDTQEEKIRQLGAWVTVQRGHAVANGLPVIAVNRVGHEPDPSGQTNGIQFWGNSFVAGPQGEILAQASNMDEENMVVELDMTRSENVRRWWPFLRDRRIDEFENLTRRFID
4041	GC_00000567		PV29FA01	1206	5	5	1	1	1	1	1	COG0388	Omega-amidase YafV/Nit2, hydrolyzes alpha-ketoglutaramate (Nit2) (PUBMED:28373563)			C	Energy production and conversion	MKRTIKVGIIQQTCTNDIRHNLSKLHHNIEQVAAAGAQLVVLQELHNTPYFCQTEDTDMFDLAEPVPGPSTGFYSELAAGYGIVLVTSLFEKRAPGLYHNTAVVFDKDGSIAGKYRKMHIPDDPAYYEKFYFTPGDLGFEPIQTSLGKLGVQVCWDQWYPEGARLMALKGAEILIYPTAIGWESTDTQEEKIRQLGAWVTVQRGHAVANGLPVIAVNRVGHEPDPSGQTNGIQFWGNSFVAGPQGEILAQASNMDEENMVVELDMTRSENVRRWWPFLRDRRIDEFENLTRRFID
4042	GC_00000567		PV2SA01	1699	5	5	1	1	1	1	1	COG0388	Omega-amidase YafV/Nit2, hydrolyzes alpha-ketoglutaramate (Nit2) (PUBMED:28373563)			C	Energy production and conversion	MKRTIKVGIIQQTCTNDIRHNLSKLHHNIEQVAAAGAQLVVLQELHNTPYFCQTEDTDMFDLAEPVPGPSTGFYSELAAGYGIVLVTSLFEKRAPGLYHNTAVVFDKDGSIAGKYRKMHIPDDPAYYEKFYFTPGDLGFEPIQTSLGKLGVQVCWDQWYPEGARLMALKGAEILIYPTAIGWESTDTQEEKIRQLGAWVTVQRGHAVANGLPVIAVNRVGHEPDPSGQTNGIQFWGNSFVAGPQGEILAQASNMDEENMVVELDMTRSENVRRWWPFLRDRRIDEFENLTRRFID
4043	GC_00000567		PV2SA02	2374	5	5	1	1	1	1	1	COG0388	Omega-amidase YafV/Nit2, hydrolyzes alpha-ketoglutaramate (Nit2) (PUBMED:28373563)			C	Energy production and conversion	MKRTIKVGIIQQTCTNDIRHNLSKLHHNIEQVAAAGAQLVVLQELHNTPYFCQTEDTDMFDLAEPVPGPSTGFYSELAAGYGIVLVTSLFEKRAPGLYHNTAVVFDKDGSIAGKYRKMHIPDDPAYYEKFYFTPGDLGFEPIQTSLGKLGVQVCWDQWYPEGARLMALKGAEILIYPTAIGWESTDTQEEKIRQLGAWVTVQRGHAVANGLPVIAVNRVGHEPDPSGQTNGIQFWGNSFVAGPQGEILAQASNMDEENMVVELDMTRSENVRRWWPFLRDRRIDEFENLTRRFID
4169	GC_00000593		PV10SA01	3211	5	5	1	1	1	1	1	COG1592	Rubrerythrin (YotD) (PDB:1B71)			C	Energy production and conversion	MKKFICTVCGYIHEGDAAPEKCPLCKAPASKFNEMVETEGGLEFADQHVIGVAKGCDEEMIKDLNNHFMGECTEVGMYLAMSRQADREGYPEVAEAFKRYAWEEAEHAAKFAELLGDCVWDTKTNLEKRMNAESGACADKKRIATRAKALNLDAIHDTVHEMAKDEARHGKGFEGLYNRYFKK
4170	GC_00000593		PV26FA01	2988	5	5	1	1	1	1	1	COG1592	Rubrerythrin (YotD) (PDB:1B71)			C	Energy production and conversion	MKKFICTVCGYIHEGDAAPEKCPLCKAPASKFNEMVETEGGLEFADQHVIGVAKGCDEEMIKDLNNHFMGECTEVGMYLAMSRQADREGYPEVAEAFKRYAWEEAEHAAKFAELLGDCVWDTKTNLEKRMNAESGACADKKRIATRAKALNLDAIHDTVHEMAKDEARHGKGFEGLYNRYFKK
4171	GC_00000593		PV29FA01	204	5	5	1	1	1	1	1	COG1592	Rubrerythrin (YotD) (PDB:1B71)			C	Energy production and conversion	MKKFICTVCGYIHEGDAAPEKCPLCKAPASKFNEMVETEGGLEFADQHVIGVAKGCDEEMIKDLNNHFMGECTEVGMYLAMSRQADREGYPEVAEAFKRYAWEEAEHAAKFAELLGDCVWDTKTNLEKRMNAESGACADKKRIATRAKALNLDAIHDTVHEMAKDEARHGKGFEGLYNRYFKK
4172	GC_00000593		PV2SA01	2456	5	5	1	1	1	1	1	COG1592	Rubrerythrin (YotD) (PDB:1B71)			C	Energy production and conversion	MKKFICTVCGYIHEGDAAPEKCPLCKAPASKFNEMVETEGGLEFADQHVIGVAKGCDEEMIKDLNNHFMGECTEVGMYLAMSRQADREGYPEVAEAFKRYAWEEAEHAAKFAELLGDCVWDTKTNLEKRMNAESGACADKKRIATRAKALNLDAIHDTVHEMAKDEARHGKGFEGLYNRYFKK
4173	GC_00000593		PV2SA02	3131	5	5	1	1	1	1	1	COG1592	Rubrerythrin (YotD) (PDB:1B71)			C	Energy production and conversion	MKKFICTVCGYIHEGDAAPEKCPLCKAPASKFNEMVETEGGLEFADQHVIGVAKGCDEEMIKDLNNHFMGECTEVGMYLAMSRQADREGYPEVAEAFKRYAWEEAEHAAKFAELLGDCVWDTKTNLEKRMNAESGACADKKRIATRAKALNLDAIHDTVHEMAKDEARHGKGFEGLYNRYFKK
4279	GC_00000615		PV10SA01	2685	5	5	1	1	1	1	1	COG1139	L-lactate utilization protein LutB, contains a ferredoxin-type domain (LutB)			C	Energy production and conversion	MSTKHSKAAAEFLKNKKQAAWHDETLWLVRAKRDRLSKEVPEWEELRNMACATKLYSNSHLDELLVEFENNARANGAHVYWAKDADEYCNIVYNILNQHGVKHFIKSKSMLAEECELNPFLESKGIEVVESDLGERILQLMHLKPSHIVLPAIHIKREQVGELFEREMGTEKGNFDPTYLTHAARKNLRQKFIHAEAAMTGANFAVASTGEIVVCTNEGNADMGTSQPKLQIAAFGMEKIVPDRESLGVFTRLLARSATGQPITTYTSHYRKPREGGELHIIIVDNGRSKILADPKHIKTLNCIRCGACMNTCPVYRRSGGYSYTYFIPGPIGINLGMLKAPLHYYDNVSACSLCYSCSFVCPAKVDLAEQIYLWRQDLDKLGKADRMKKVMSGGMEFM…
4280	GC_00000615		PV26FA01	3496	5	5	1	1	1	1	1	COG1139	L-lactate utilization protein LutB, contains a ferredoxin-type domain (LutB)			C	Energy production and conversion	MSTKHSKAAAEFLKNKKQAAWHDETLWLVRAKRDRLSKEVPEWEELRNMACATKLYSNSHLDELLVEFENNARANGAHVYWAKDADEYCNIVYNILNQHGVKHFIKSKSMLAEECELNPFLESKGIEVVESDLGERILQLMHLKPSHIVLPAIHIKREQVGELFEREMGTEKGNFDPTYLTHAARKNLRQKFIHAEAAMTGANFAVASTGEIVVCTNEGNADMGTSQPKLQIAAFGMEKIVPDRESLGVFTRLLARSATGQPITTYTSHYRKPREGGELHIIIVDNGRSKILADPKHIKTLNCIRCGACMNTCPVYRRSGGYSYTYFIPGPIGINLGMLKAPLHYYDNVSACSLCYSCSFVCPAKVDLAEQIYLWRQDLDKLGKADRMKKVMSGGMEFM…
4281	GC_00000615		PV29FA01	913	5	5	1	1	1	1	1	COG1139	L-lactate utilization protein LutB, contains a ferredoxin-type domain (LutB)			C	Energy production and conversion	MSTKHSKAAAEFLKNKKQAAWHDETLWLVRAKRDRLSKEVPEWEELRNMACATKLYSNSHLDELLVEFENNARANGAHVYWAKDADEYCNIVYNILNQHGVKHFIKSKSMLAEECELNPFLESKGIEVVESDLGERILQLMHLKPSHIVLPAIHIKREQVGELFEREMGTEKGNFDPTYLTHAARKNLRQKFIHAEAAMTGANFAVASTGEIVVCTNEGNADMGTSQPKLQIAAFGMEKIVPDRESLGVFTRLLARSATGQPITTYTSHYRKPREGGELHIIIVDNGRSKILADPKHIKTLNCIRCGACMNTCPVYRRSGGYSYTYFIPGPIGINLGMLKAPLHYYDNVSACSLCYSCSFVCPAKVDLAEQIYLWRQDLDKLGKADRMKKVMSGGMEFM…
4282	GC_00000615		PV2SA01	1193	5	5	1	1	1	1	1	COG1139	L-lactate utilization protein LutB, contains a ferredoxin-type domain (LutB)			C	Energy production and conversion	MSTKHSKAAAEFLKNKKQAAWHDETLWLVRAKRDRLSKEVPEWEELRNMACATKLYSNSHLDELLVEFENNARANGAHVYWAKDADEYCNIVYNILNQHGVKHFIKSKSMLAEECELNPFLESKGIEVVESDLGERILQLMHLKPSHIVLPAIHIKREQVGELFEREMGTEKGNFDPTYLTHAARKNLRQKFIHAEAAMTGANFAVASTGEIVVCTNEGNADMGTSQPKLQIAAFGMEKIVPDRESLGVFTRLLARSATGQPITTYTSHYRKPREGGELHIIIVDNGRSKILADPKHIKTLNCIRCGACMNTCPVYRRSGGYSYTYFIPGPIGINLGMLKAPLHYYDNVSACSLCYSCSFVCPAKVDLAEQIYLWRQDLDKLGKADRMKKVMSGGMEFM…
4283	GC_00000615		PV2SA02	1868	5	5	1	1	1	1	1	COG1139	L-lactate utilization protein LutB, contains a ferredoxin-type domain (LutB)			C	Energy production and conversion	MSTKHSKAAAEFLKNKKQAAWHDETLWLVRAKRDRLSKEVPEWEELRNMACATKLYSNSHLDELLVEFENNARANGAHVYWAKDADEYCNIVYNILNQHGVKHFIKSKSMLAEECELNPFLESKGIEVVESDLGERILQLMHLKPSHIVLPAIHIKREQVGELFEREMGTEKGNFDPTYLTHAARKNLRQKFIHAEAAMTGANFAVASTGEIVVCTNEGNADMGTSQPKLQIAAFGMEKIVPDRESLGVFTRLLARSATGQPITTYTSHYRKPREGGELHIIIVDNGRSKILADPKHIKTLNCIRCGACMNTCPVYRRSGGYSYTYFIPGPIGINLGMLKAPLHYYDNVSACSLCYSCSFVCPAKVDLAEQIYLWRQDLDKLGKADRMKKVMSGGMEFM…
4334	GC_00000626		PV10SA01	3515	5	5	1	1	1	1	1	COG0426	Flavorubredoxin (NorV) (PDB:4JHC)			C	Energy production and conversion	MEIKGKVHYVGVNDRNKALFENLWPLPYGVSYNSYLIDDEMVALVDTVDVCYFEVYLKKIRSIIGDKPINYLIINHMEPDHSGSISLIKQYYPNIVIVGNKKTFEMIEGYYGVGGERYVVGEGDFLALGHHRLRFSLIPMVHWPETMVTFDETEGILFSGDAFGCFGALNGGVVDTNINTDIYWNEMVRYYSNIVGKYGAPVQKALQKLQNLKITTVCSTHGPVWTEEIPRVVRIYDRLSRYEAEEGVVIAYGSMYGNTEEVAEAIAEELSKQGIRNIVMHNVSHTSHSFIIADVFKYKGLIVGCPTYNTQMYPEMEALLSKLASREIKGRYLGYFGSFTWASAAVKKIAEFNDKLKFEPVGNPVEMKHSMKAETNTQAKELAKAMADRLKADRK
4335	GC_00000626		PV26FA01	2650	5	5	1	1	1	1	1	COG0426	Flavorubredoxin (NorV) (PDB:4JHC)			C	Energy production and conversion	MEIKGKVHYVGVNDRNKALFENLWPLPYGVSYNSYLIDDEMVALVDTVDVCYFEVYLKKIRSIIGDKPINYLIINHMEPDHSGSISLIKQYYPNIVIVGNKKTFEMIEGYYGVGGERYVVGEGDFLALGHHRLRFSLIPMVHWPETMVTFDETEGILFSGDAFGCFGALNGGVVDTNINTDIYWNEMVRYYSNIVGKYGAPVQKALQKLQNLKITTVCSTHGPVWTEEIPRVVRIYDRLSRYEAEEGVVIAYGSMYGNTEEVAEAIAEELSKQGIRNIVMHNVSHTSHSFIIADVFKYKGLIVGCPTYNTQMYPEMEALLSKLASREIKGRYLGYFGSFTWASAAVKKIAEFNDKLKFEPVGNPVEMKHSMKAETNTQAKELAKAMADRLKADRK
4336	GC_00000626		PV29FA01	4362	5	5	1	1	1	1	1	COG0426	Flavorubredoxin (NorV) (PDB:4JHC)			C	Energy production and conversion	MEIKGKVHYVGVNDRNKALFENLWPLPYGVSYNSYLIDDEMVALVDTVDVCYFEVYLKKIRSIIGDKPINYLIINHMEPDHSGSISLIKQYYPNIVIVGNKKTFEMIEGYYGVGGERYVVGEGDFLALGHHRLRFSLIPMVHWPETMVTFDETEGILFSGDAFGCFGALNGGVVDTNINTDIYWNEMVRYYSNIVGKYGAPVQKALQKLQNLKITTVCSTHGPVWTEEIPRVVRIYDRLSRYEAEEGVVIAYGSMYGNTEEVAEAIAEELSKQGIRNIVMHNVSHTSHSFIIADVFKYKGLIVGCPTYNTQMYPEMEALLSKLASREIKGRYLGYFGSFTWASAAVKKIAEFNDKLKFEPVGNPVEMKHSMKAETNTQAKELAKAMADRLKADRK
4337	GC_00000626		PV2SA01	2894	5	5	1	1	1	1	1	COG0426	Flavorubredoxin (NorV) (PDB:4JHC)			C	Energy production and conversion	MEIKGKVHYVGVNDRNKALFENLWPLPYGVSYNSYLIDDEMVALVDTVDVCYFEVYLKKIRSIIGDKPINYLIINHMEPDHSGSISLIKQYYPNIVIVGNKKTFEMIEGYYGVGGERYVVGEGDFLALGHHRLRFSLIPMVHWPETMVTFDETEGILFSGDAFGCFGALNGGVVDTNINTDIYWNEMVRYYSNIVGKYGAPVQKALQKLQNLKITTVCSTHGPVWTEEIPRVVRIYDRLSRYEAEEGVVIAYGSMYGNTEEVAEAIAEELSKQGIRNIVMHNVSHTSHSFIIADVFKYKGLIVGCPTYNTQMYPEMEALLSKLASREIKGRYLGYFGSFTWASAAVKKIAEFNDKLKFEPVGNPVEMKHSMKAETNTQAKELAKAMADRLKADRK
4338	GC_00000626		PV2SA02	3569	5	5	1	1	1	1	1	COG0426	Flavorubredoxin (NorV) (PDB:4JHC)			C	Energy production and conversion	MEIKGKVHYVGVNDRNKALFENLWPLPYGVSYNSYLIDDEMVALVDTVDVCYFEVYLKKIRSIIGDKPINYLIINHMEPDHSGSISLIKQYYPNIVIVGNKKTFEMIEGYYGVGGERYVVGEGDFLALGHHRLRFSLIPMVHWPETMVTFDETEGILFSGDAFGCFGALNGGVVDTNINTDIYWNEMVRYYSNIVGKYGAPVQKALQKLQNLKITTVCSTHGPVWTEEIPRVVRIYDRLSRYEAEEGVVIAYGSMYGNTEEVAEAIAEELSKQGIRNIVMHNVSHTSHSFIIADVFKYKGLIVGCPTYNTQMYPEMEALLSKLASREIKGRYLGYFGSFTWASAAVKKIAEFNDKLKFEPVGNPVEMKHSMKAETNTQAKELAKAMADRLKADRK
4629	GC_00000685		PV10SA01	3122	5	5	1	1	1	1	1	COG3630	Na+-transporting oxaloacetate/methylmalonyl-CoA decarboxylase, gamma subunit (OadG)			C	Energy production and conversion	MKKLNIGIFLSLLLMVGLCSCGEQKSNTKLVLNEVLIENESNFQDDYGVHSAWIEIFNRSFGSADLAGCLLKVSSQPGDTATYFIPKGDVLTLVKPRQHALFWADGEPNRGTFHTNFTLNAATDNWIGLYDSGKKLLDQIIVPAGTLQANQSYARVSDAANEWEVKGSSADKYVTPSTNNKTINSHAKMEKFEEHDGSGIGMAISAMSVVFCGLLLLFILFKCVGKISVNLSKRNAMKVKGITDKQEAKEKKLGEAPGEVFAAIAMAMHEMQSDVHDVEETVLTITRVKRSYSPWSSKIYTLRETPHKK
4630	GC_00000685		PV26FA01	3123	5	5	1	1	1	1	1	COG3630	Na+-transporting oxaloacetate/methylmalonyl-CoA decarboxylase, gamma subunit (OadG)			C	Energy production and conversion	MKKLNIGIFLSLLLMVGLCSCGEQKSNTKLVLNEVLIENESNFQDDYGVHSAWIEIFNRSFGSADLAGCLLKVSSQPGDTATYFIPKGDVLTLVKPRQHALFWADGEPNRGTFHTNFTLNAATDNWIGLYDSGKKLLDQIIVPAGTLQANQSYARVSDAANEWEVKGSSADKYVTPSTNNKTINSHAKMEKFEEHDGSGIGMAISAMSVVFCGLLLLFILFKCVGKISVNLSKRNAMKVKGITDKQEAKEKKLGEAPGEVFAAIAMAMHEMQSDVHDVEETVLTITRVKRSYSPWSSKIYTLRETPHKK
4631	GC_00000685		PV29FA01	311	5	5	1	1	1	1	1	COG3630	Na+-transporting oxaloacetate/methylmalonyl-CoA decarboxylase, gamma subunit (OadG)			C	Energy production and conversion	MKKLNIGIFLSLLLMVGLCSCGEQKSNTKLVLNEVLIENESNFQDDYGVHSAWIEIFNRSFGSADLAGCLLKVSSQPGDTATYFIPKGDVLTLVKPRQHALFWADGEPNRGTFHTNFTLNAATDNWIGLYDSGKKLLDQIIVPAGTLQANQSYARVSDAANEWEVKGSSADKYVTPSTNNKTINSHAKMEKFEEHDGSGIGMAISAMSVVFCGLLLLFILFKCVGKISVNLSKRNAMKVKGITDKQEAKEKKLGEAPGEVFAAIAMAMHEMQSDVHDVEETVLTITRVKRSYSPWSSKIYTLRETPHKK
4632	GC_00000685		PV2SA01	2290	5	5	1	1	1	1	1	COG3630	Na+-transporting oxaloacetate/methylmalonyl-CoA decarboxylase, gamma subunit (OadG)			C	Energy production and conversion	MKKLNIGIFLSLLLMVGLCSCGEQKSNTKLVLNEVLIENESNFQDDYGVHSAWIEIFNRSFGSADLAGCLLKVSSQPGDTATYFIPKGDVLTLVKPRQHALFWADGEPNRGTFHTNFTLNAATDNWIGLYDSGKKLLDQIIVPAGTLQANQSYARVSDAANEWEVKGSSADKYVTPSTNNKTINSHAKMEKFEEHDGSGIGMAISAMSVVFCGLLLLFILFKCVGKISVNLSKRNAMKVKGITDKQEAKEKKLGEAPGEVFAAIAMAMHEMQSDVHDVEETVLTITRVKRSYSPWSSKIYTLRETPHKK
4633	GC_00000685		PV2SA02	2965	5	5	1	1	1	1	1	COG3630	Na+-transporting oxaloacetate/methylmalonyl-CoA decarboxylase, gamma subunit (OadG)			C	Energy production and conversion	MKKLNIGIFLSLLLMVGLCSCGEQKSNTKLVLNEVLIENESNFQDDYGVHSAWIEIFNRSFGSADLAGCLLKVSSQPGDTATYFIPKGDVLTLVKPRQHALFWADGEPNRGTFHTNFTLNAATDNWIGLYDSGKKLLDQIIVPAGTLQANQSYARVSDAANEWEVKGSSADKYVTPSTNNKTINSHAKMEKFEEHDGSGIGMAISAMSVVFCGLLLLFILFKCVGKISVNLSKRNAMKVKGITDKQEAKEKKLGEAPGEVFAAIAMAMHEMQSDVHDVEETVLTITRVKRSYSPWSSKIYTLRETPHKK
4754	GC_00000710		PV10SA01	2686	5	5	1	1	1	1	1	COG0247	Fe-S cluster-containing oxidoreductase, includes glycolate oxidase subunit GlcF (GlpC)			C	Energy production and conversion	MTMKVGLFIPCYINAVYPQVGIASYKLLKSLGVDVDYPLNQTCCGQPMANAGFENKAVDLARHFDEQFKNYDYIVGPSASCVVFVRDNYSRLLKEDKHRCASEGKIYDICEFIHDIVKPSSLKAKFPHKVSLQNSCHGVRLMKLSSASELNIPYFSKLRDLLSLVEGVEVVEPERKDECCGFGGMFAVEEDAVSVQMGHDKVMRHIATGAEYIVGADSSCLMHQNGIIARDKLPIKTLHIVEILAAGL
4755	GC_00000710		PV26FA01	3495	5	5	1	1	1	1	1	COG0247	Fe-S cluster-containing oxidoreductase, includes glycolate oxidase subunit GlcF (GlpC)			C	Energy production and conversion	MTMKVGLFIPCYINAVYPQVGIASYKLLKSLGVDVDYPLNQTCCGQPMANAGFENKAVDLARHFDEQFKNYDYIVGPSASCVVFVRDNYSRLLKEDKHRCASEGKIYDICEFIHDIVKPSSLKAKFPHKVSLQNSCHGVRLMKLSSASELNIPYFSKLRDLLSLVEGVEVVEPERKDECCGFGGMFAVEEDAVSVQMGHDKVMRHIATGAEYIVGADSSCLMHQNGIIARDKLPIKTLHIVEILAAGL
4756	GC_00000710		PV29FA01	912	5	5	1	1	1	1	1	COG0247	Fe-S cluster-containing oxidoreductase, includes glycolate oxidase subunit GlcF (GlpC)			C	Energy production and conversion	MTMKVGLFIPCYINAVYPQVGIASYKLLKSLGVDVDYPLNQTCCGQPMANAGFENKAVDLARHFDEQFKNYDYIVGPSASCVVFVRDNYSRLLKEDKHRCASEGKIYDICEFIHDIVKPSSLKAKFPHKVSLQNSCHGVRLMKLSSASELNIPYFSKLRDLLSLVEGVEVVEPERKDECCGFGGMFAVEEDAVSVQMGHDKVMRHIATGAEYIVGADSSCLMHQNGIIARDKLPIKTLHIVEILAAGL
4757	GC_00000710		PV2SA01	1192	5	5	1	1	1	1	1	COG0247	Fe-S cluster-containing oxidoreductase, includes glycolate oxidase subunit GlcF (GlpC)			C	Energy production and conversion	MTMKVGLFIPCYINAVYPQVGIASYKLLKSLGVDVDYPLNQTCCGQPMANAGFENKAVDLARHFDEQFKNYDYIVGPSASCVVFVRDNYSRLLKEDKHRCASEGKIYDICEFIHDIVKPSSLKAKFPHKVSLQNSCHGVRLMKLSSASELNIPYFSKLRDLLSLVEGVEVVEPERKDECCGFGGMFAVEEDAVSVQMGHDKVMRHIATGAEYIVGADSSCLMHQNGIIARDKLPIKTLHIVEILAAGL
4758	GC_00000710		PV2SA02	1867	5	5	1	1	1	1	1	COG0247	Fe-S cluster-containing oxidoreductase, includes glycolate oxidase subunit GlcF (GlpC)			C	Energy production and conversion	MTMKVGLFIPCYINAVYPQVGIASYKLLKSLGVDVDYPLNQTCCGQPMANAGFENKAVDLARHFDEQFKNYDYIVGPSASCVVFVRDNYSRLLKEDKHRCASEGKIYDICEFIHDIVKPSSLKAKFPHKVSLQNSCHGVRLMKLSSASELNIPYFSKLRDLLSLVEGVEVVEPERKDECCGFGGMFAVEEDAVSVQMGHDKVMRHIATGAEYIVGADSSCLMHQNGIIARDKLPIKTLHIVEILAAGL
5929	GC_00000946		PV10SA01	1019	5	5	1	1	1	1	1	COG2086	Electron transfer flavoprotein, alpha and beta subunits (FixA) (PDB:5OL2)			C	Energy production and conversion	MSLKIVVLAKQVPDTRNVGKDAMNADGTINRAALPAIFNPEDLNALEQALRLKDTHPGSTVTILTMGPGRAAEIIREGLYRGADNGYLLTDRAFAGADTLATSYAIATAIRKIGECDLIIGGRQAIDGDTAQVGPQVAEKLGLSQITYTEEILNVDETARRITVKRHIDGGVETVEGPLPIVLTVNGSAAPCRPRNAKLLQKYKRALGAQEKAAITKDGSELPYAELYEKFPYLNITEWSVADVEGDTKQCGLSGSPTKVKKIENIVFQAKESKTMTGSDQDVEGLIVELLANHTIG
5930	GC_00000946		PV26FA01	1065	5	5	1	1	1	1	1	COG2086	Electron transfer flavoprotein, alpha and beta subunits (FixA) (PDB:5OL2)			C	Energy production and conversion	MSLKIVVLAKQVPDTRNVGKDAMNADGTINRAALPAIFNPEDLNALEQALRLKDTHPGSTVTILTMGPGRAAEIIREGLYRGADNGYLLTDRAFAGADTLATSYAIATAIRKIGECDLIIGGRQAIDGDTAQVGPQVAEKLGLSQITYTEEILNVDETARRITVKRHIDGGVETVEGPLPIVLTVNGSAAPCRPRNAKLLQKYKRALGAQEKAAITKDGSELPYAELYEKFPYLNITEWSVADVEGDTKQCGLSGSPTKVKKIENIVFQAKESKTMTGSDQDVEGLIVELLANHTIG
5931	GC_00000946		PV29FA01	2719	5	5	1	1	1	1	1	COG2086	Electron transfer flavoprotein, alpha and beta subunits (FixA) (PDB:5OL2)			C	Energy production and conversion	MSLKIVVLAKQVPDTRNVGKDAMNADGTINRAALPAIFNPEDLNALEQALRLKDTHPGSTVTILTMGPGRAAEIIREGLYRGADNGYLLTDRAFAGADTLATSYAIATAIRKIGECDLIIGGRQAIDGDTAQVGPQVAEKLGLSQITYTEEILNVDETARRITVKRHIDGGVETVEGPLPIVLTVNGSAAPCRPRNAKLLQKYKRALGAQEKAAITKDGSELPYAELYEKFPYLNITEWSVADVEGDTKQCGLSGSPTKVKKIENIVFQAKESKTMTGSDQDVEGLIVELLANHTIG
5932	GC_00000946		PV2SA01	309	5	5	1	1	1	1	1	COG2086	Electron transfer flavoprotein, alpha and beta subunits (FixA) (PDB:5OL2)			C	Energy production and conversion	MSLKIVVLAKQVPDTRNVGKDAMNADGTINRAALPAIFNPEDLNALEQALRLKDTHPGSTVTILTMGPGRAAEIIREGLYRGADNGYLLTDRAFAGADTLATSYAIATAIRKIGECDLIIGGRQAIDGDTAQVGPQVAEKLGLSQITYTEEILNVDETARRITVKRHIDGGVETVEGPLPIVLTVNGSAAPCRPRNAKLLQKYKRALGAQEKAAITKDGSELPYAELYEKFPYLNITEWSVADVEGDTKQCGLSGSPTKVKKIENIVFQAKESKTMTGSDQDVEGLIVELLANHTIG
5933	GC_00000946		PV2SA02	984	5	5	1	1	1	1	1	COG2086	Electron transfer flavoprotein, alpha and beta subunits (FixA) (PDB:5OL2)			C	Energy production and conversion	MSLKIVVLAKQVPDTRNVGKDAMNADGTINRAALPAIFNPEDLNALEQALRLKDTHPGSTVTILTMGPGRAAEIIREGLYRGADNGYLLTDRAFAGADTLATSYAIATAIRKIGECDLIIGGRQAIDGDTAQVGPQVAEKLGLSQITYTEEILNVDETARRITVKRHIDGGVETVEGPLPIVLTVNGSAAPCRPRNAKLLQKYKRALGAQEKAAITKDGSELPYAELYEKFPYLNITEWSVADVEGDTKQCGLSGSPTKVKKIENIVFQAKESKTMTGSDQDVEGLIVELLANHTIG
6024	GC_00000965		PV10SA01	1018	5	5	1	1	1	1	1	COG2025	Electron transfer flavoprotein, alpha subunit FixB (FixB) (PDB:1EFP)			C	Energy production and conversion	MNNVFVYCEIEGTTVADVSLELLTKGRKLANQLGCQLEAIAAGTGLAGIEKQVLPYGVDKLHVFDAPGLFPYTSLPHTSILVNLFKEEKPQICLMGATVIGRDLGPRVSSALTSGLTADCTQLEIGTHEDKKNGITYENLLYQIRPAFGGNIVATIVNPEHRPQMATVREGVMKKEILDENYKGEVVNHDVAKFVPETDYVVKVIDRHVEKAKHNLKGAPIVIAGGYGMGSKEGFDKLFELAKELHAEVGASRAAVDAGYADHDRQIGQTGVTVRPKLYIACGISGQIQHIAGMQDAGIIISVNSDPNAPINTIADYVINGTVEEVVPKLIKYYKKNSK
6025	GC_00000965		PV26FA01	1066	5	5	1	1	1	1	1	COG2025	Electron transfer flavoprotein, alpha subunit FixB (FixB) (PDB:1EFP)			C	Energy production and conversion	MNNVFVYCEIEGTTVADVSLELLTKGRKLANQLGCQLEAIAAGTGLAGIEKQVLPYGVDKLHVFDAPGLFPYTSLPHTSILVNLFKEEKPQICLMGATVIGRDLGPRVSSALTSGLTADCTQLEIGTHEDKKNGITYENLLYQIRPAFGGNIVATIVNPEHRPQMATVREGVMKKEILDENYKGEVVNHDVAKFVPETDYVVKVIDRHVEKAKHNLKGAPIVIAGGYGMGSKEGFDKLFELAKELHAEVGASRAAVDAGYADHDRQIGQTGVTVRPKLYIACGISGQIQHIAGMQDAGIIISVNSDPNAPINTIADYVINGTVEEVVPKLIKYYKKNSK
6026	GC_00000965		PV29FA01	2720	5	5	1	1	1	1	1	COG2025	Electron transfer flavoprotein, alpha subunit FixB (FixB) (PDB:1EFP)			C	Energy production and conversion	MNNVFVYCEIEGTTVADVSLELLTKGRKLANQLGCQLEAIAAGTGLAGIEKQVLPYGVDKLHVFDAPGLFPYTSLPHTSILVNLFKEEKPQICLMGATVIGRDLGPRVSSALTSGLTADCTQLEIGTHEDKKNGITYENLLYQIRPAFGGNIVATIVNPEHRPQMATVREGVMKKEILDENYKGEVVNHDVAKFVPETDYVVKVIDRHVEKAKHNLKGAPIVIAGGYGMGSKEGFDKLFELAKELHAEVGASRAAVDAGYADHDRQIGQTGVTVRPKLYIACGISGQIQHIAGMQDAGIIISVNSDPNAPINTIADYVINGTVEEVVPKLIKYYKKNSK
6027	GC_00000965		PV2SA01	308	5	5	1	1	1	1	1	COG2025	Electron transfer flavoprotein, alpha subunit FixB (FixB) (PDB:1EFP)			C	Energy production and conversion	MNNVFVYCEIEGTTVADVSLELLTKGRKLANQLGCQLEAIAAGTGLAGIEKQVLPYGVDKLHVFDAPGLFPYTSLPHTSILVNLFKEEKPQICLMGATVIGRDLGPRVSSALTSGLTADCTQLEIGTHEDKKNGITYENLLYQIRPAFGGNIVATIVNPEHRPQMATVREGVMKKEILDENYKGEVVNHDVAKFVPETDYVVKVIDRHVEKAKHNLKGAPIVIAGGYGMGSKEGFDKLFELAKELHAEVGASRAAVDAGYADHDRQIGQTGVTVRPKLYIACGISGQIQHIAGMQDAGIIISVNSDPNAPINTIADYVINGTVEEVVPKLIKYYKKNSK
6028	GC_00000965		PV2SA02	983	5	5	1	1	1	1	1	COG2025	Electron transfer flavoprotein, alpha subunit FixB (FixB) (PDB:1EFP)			C	Energy production and conversion	MNNVFVYCEIEGTTVADVSLELLTKGRKLANQLGCQLEAIAAGTGLAGIEKQVLPYGVDKLHVFDAPGLFPYTSLPHTSILVNLFKEEKPQICLMGATVIGRDLGPRVSSALTSGLTADCTQLEIGTHEDKKNGITYENLLYQIRPAFGGNIVATIVNPEHRPQMATVREGVMKKEILDENYKGEVVNHDVAKFVPETDYVVKVIDRHVEKAKHNLKGAPIVIAGGYGMGSKEGFDKLFELAKELHAEVGASRAAVDAGYADHDRQIGQTGVTVRPKLYIACGISGQIQHIAGMQDAGIIISVNSDPNAPINTIADYVINGTVEEVVPKLIKYYKKNSK
6819	GC_00001125		PV10SA01	3534	5	5	1	1	1	1	1	COG1883	Na+-transporting oxaloacetate/methylmalonyl-CoA decarboxylase, beta subunit (OadB)			C	Energy production and conversion	MEDIFERLYDMTAFSNIIAEPQFLIMYAIAFILLYLGIKKKYEPLLLIPIAFGVLLANFPGGEMGVVQADENGMVMVNGALKNIWEMPLHEIAHDLGLMNFIYYMLIKTGFLPPIIFMGVGALTDFGPMLRNLRLSIFGAAAQLGIFTVLLVAILMGFTPKEAASLGIIGGADGPTAIFTTIKLAPHLLGPIAIAAYSYMALVPVIIPLVVKIWCTKKELSINMKEQEKKYPSSVEIKNLRVLKIVFPIVVTTVVALFVPSAVPLIGMLMFGNLIKEIGSDTSRLFDAASNSIMNAATIFLGLSVGATMTTEAFLNWTTIGIVIGGFLAFALSISGGILFVKLVNLFTKKKINPLIGATGLSAVPMASRVANEIALKYDPKNHVLQYCMASNISGVIGS…
6820	GC_00001125		PV26FA01	2632	5	5	1	1	1	1	1	COG1883	Na+-transporting oxaloacetate/methylmalonyl-CoA decarboxylase, beta subunit (OadB)			C	Energy production and conversion	MEDIFERLYDMTAFSNIIAEPQFLIMYAIAFILLYLGIKKKYEPLLLIPIAFGVLLANFPGGEMGVVQADENGMVMVNGALKNIWEMPLHEIAHDLGLMNFIYYMLIKTGFLPPIIFMGVGALTDFGPMLRNLRLSIFGAAAQLGIFTVLLVAILMGFTPKEAASLGIIGGADGPTAIFTTIKLAPHLLGPIAIAAYSYMALVPVIIPLVVKIWCTKKELSINMKEQEKKYPSSVEIKNLRVLKIVFPIVVTTVVALFVPSAVPLIGMLMFGNLIKEIGSDTSRLFDAASNSIMNAATIFLGLSVGATMTTEAFLNWTTIGIVIGGFLAFALSISGGILFVKLVNLFTKKKINPLIGATGLSAVPMASRVANEIALKYDPKNHVLQYCMASNISGVIGS…
6821	GC_00001125		PV29FA01	4345	5	5	1	1	1	1	1	COG1883	Na+-transporting oxaloacetate/methylmalonyl-CoA decarboxylase, beta subunit (OadB)			C	Energy production and conversion	MEDIFERLYDMTAFSNIIAEPQFLIMYAIAFILLYLGIKKKYEPLLLIPIAFGVLLANFPGGEMGVVQADENGMVMVNGALKNIWEMPLHEIAHDLGLMNFIYYMLIKTGFLPPIIFMGVGALTDFGPMLRNLRLSIFGAAAQLGIFTVLLVAILMGFTPKEAASLGIIGGADGPTAIFTTIKLAPHLLGPIAIAAYSYMALVPVIIPLVVKIWCTKKELSINMKEQEKKYPSSVEIKNLRVLKIVFPIVVTTVVALFVPSAVPLIGMLMFGNLIKEIGSDTSRLFDAASNSIMNAATIFLGLSVGATMTTEAFLNWTTIGIVIGGFLAFALSISGGILFVKLVNLFTKKKINPLIGATGLSAVPMASRVANEIALKYDPKNHVLQYCMASNISGVIGS…
6822	GC_00001125		PV2SA01	2913	5	5	1	1	1	1	1	COG1883	Na+-transporting oxaloacetate/methylmalonyl-CoA decarboxylase, beta subunit (OadB)			C	Energy production and conversion	MEDIFERLYDMTAFSNIIAEPQFLIMYAIAFILLYLGIKKKYEPLLLIPIAFGVLLANFPGGEMGVVQADENGMVMVNGALKNIWEMPLHEIAHDLGLMNFIYYMLIKTGFLPPIIFMGVGALTDFGPMLRNLRLSIFGAAAQLGIFTVLLVAILMGFTPKEAASLGIIGGADGPTAIFTTIKLAPHLLGPIAIAAYSYMALVPVIIPLVVKIWCTKKELSINMKEQEKKYPSSVEIKNLRVLKIVFPIVVTTVVALFVPSAVPLIGMLMFGNLIKEIGSDTSRLFDAASNSIMNAATIFLGLSVGATMTTEAFLNWTTIGIVIGGFLAFALSISGGILFVKLVNLFTKKKINPLIGATGLSAVPMASRVANEIALKYDPKNHVLQYCMASNISGVIGS…
6823	GC_00001125		PV2SA02	3588	5	5	1	1	1	1	1	COG1883	Na+-transporting oxaloacetate/methylmalonyl-CoA decarboxylase, beta subunit (OadB)			C	Energy production and conversion	MEDIFERLYDMTAFSNIIAEPQFLIMYAIAFILLYLGIKKKYEPLLLIPIAFGVLLANFPGGEMGVVQADENGMVMVNGALKNIWEMPLHEIAHDLGLMNFIYYMLIKTGFLPPIIFMGVGALTDFGPMLRNLRLSIFGAAAQLGIFTVLLVAILMGFTPKEAASLGIIGGADGPTAIFTTIKLAPHLLGPIAIAAYSYMALVPVIIPLVVKIWCTKKELSINMKEQEKKYPSSVEIKNLRVLKIVFPIVVTTVVALFVPSAVPLIGMLMFGNLIKEIGSDTSRLFDAASNSIMNAATIFLGLSVGATMTTEAFLNWTTIGIVIGGFLAFALSISGGILFVKLVNLFTKKKINPLIGATGLSAVPMASRVANEIALKYDPKNHVLQYCMASNISGVIGS…
7194	GC_00001200		PV10SA01	3315	5	5	1	1	0.999455	1	0.999727	COG3808	Na+ or H+-translocating membrane pyrophosphatase (OVP1) (PDB:4A01) (PUBMED:11342551)			C	Energy production and conversion	METYLFWIVPIASLLALVLAWYFYKQMMLESEGTPTMEKIASYVRQGAMSYLKQQYKVVGLVFLGLVILFSIMAYGFNLQNPWVPIAFLTGGFFSGLSGFLGMKTATYASARTANAAQHSLNKGLRVAFRSGAVMGLVVVGLGLLDISFWYILLDYCIPTDALNPSAKLCVITTTMLTFGMGASTQALFARVGGGIYTKAADVGADLVGKVEAGIPEDDPRNPATIADNVGDNVGDVAGMGADLYESYCGSILATAALGAAAFIGSDDTVMQFKAVIAPMLIAAVGIVLSIIGIFAVRTKENAGMKELLGSLATGTNLSSVLIVVATFLILWALGLENWVNISFAVVVGLIVGIVIGRSTEYYTSQSYKPTQRLAESGKTGPATVIISGIGLGMVSTTI…
7195	GC_00001200		PV26FA01	2900	5	5	1	1	0.999455	1	0.999727	COG3808	Na+ or H+-translocating membrane pyrophosphatase (OVP1) (PDB:4A01) (PUBMED:11342551)			C	Energy production and conversion	METYLFWIVPIASLLALVLAWYFYKQMMLESEGTPTMEKIASYVRQGAMSYLKQQYKVVGLVFLGLVILFSIMAYGFNLQNPWVPIAFLTGGFFSGLSGFLGMKTATYASARTANAAQHSLNKGLRVAFRSGAVMGLVVVGLGLLDISFWYILLDYCIPTDALNPSAKLCVITTTMLTFGMGASTQALFARVGGGIYTKAADVGADLVGKVEAGIPEDDPRNPATIADNVGDNVGDVAGMGADLYESYCGSILATAALGAAAFIGSDDTVMQFKAVIAPMLIAAVGIVLSIIGIFAVRTKENAGMKELLGSLATGTNLSSVLIVVATFLILWALGLENWVNISFAVVVGLIVGIVIGRSTEYYTSQSYKPTQRLAESGKTGPATVIISGIGLGMVSTTI…
7196	GC_00001200		PV29FA01	109	5	5	1	1	0.999455	1	0.999727	COG3808	Na+ or H+-translocating membrane pyrophosphatase (OVP1) (PDB:4A01) (PUBMED:11342551)			C	Energy production and conversion	METYLFWIVPIASLLALVLAWYFYKQMMLESEGTPTMEKIASYVRQGAMSYLKQQYKVVGLVFLGLVILFSIMAYGFNLQNPWVPIAFLTGGFFSGLSGFLGMKTATYASARTANAAQHSLNKGLRVAFRSGAVMGLVVVGLGLLDISFWYILLDYCIPTDALNPSAKLCVITTTMLTFGMGASTQALFARVGGGIYTKAADVGADLVGKVEAGIPEDDPRNPATIADNVGDNVGDVAGMGADLYESYCGSILATAALGAAAFIGSDDTVMQFKAVIAPMLIAAVGIVLSIIGIFAVRTKENAGMKELLGSLATGTNLSSVLIVVATFLILWALGLENWVNISFAVVVGLIVGIVIGRSTEYYTSQSYKPTQRLAESGKTGPATVIISGIGLGMVSTTI…
7197	GC_00001200		PV2SA01	2548	5	5	1	1	0.999455	1	0.999727	COG3808	Na+ or H+-translocating membrane pyrophosphatase (OVP1) (PDB:4A01) (PUBMED:11342551)			C	Energy production and conversion	METYLFWIVPIASLLALVLAWYFYKQMMLESEGTPTMEKIASYVRQGAMSYLKQQYKVVGLVFLGLVILFSIMAYGFNLQNPWVPIAFLTGGFFSGLSGFLGMKTATYASARTANAAQHSLNKGLRVAFRSGAVMGLVVVGLGLLDISFWYILLDYCIPTDALNPSAKLCVITTTMLTFGMGASTQALFARVGGGIYTKAADVGADLVGKVEAGIPEDDPRNPATIADNVGDNVGDVAGMGADLYESYCGSILATAALGAAAFIGSDDTVMQFKAVIAPMLIAAVGIVLSIIGIFAVRTKENAGMKELLGSLATGTNLSSVLIVVATFLILWALGLENWVNISFAVVVGLIVGIVIGRSTEYYTSQSYKPTQRLAESGKTGPATVIISGIGLGMVSTTI…
7198	GC_00001200		PV2SA02	3223	5	5	1	1	0.999455	1	0.999727	COG3808	Na+ or H+-translocating membrane pyrophosphatase (OVP1) (PDB:4A01) (PUBMED:11342551)			C	Energy production and conversion	METYLFWIVPIASLLALVLAWYFYKQMMLESEGTPTMEKIASYVRQGAMSYLKQQYKVVGLVFLGLVILFSIMAYGFNLQNPWVPIAFLTGGFFSGLSGFLGMKTATYASARTANAAQHSLNKGLRVAFRSGAVMGLVVVGLGLLDISFWYILLDYCIPTDALNPSAKLCVITTTMLTFGMGASTQALFARVGGGIYTKAADVGADLVGKVEAGIPEDDPRNPATIADNVGDNVGDVAGMGADLYESYCGSILATAALGAAAFIGSDDTVMQFKAVIAPMLIAAVGIVLSIIGIFAVRTKENAGMKELLGSLATGTNLSSVLIVVATFLILWALGLENWVNISFAVVVGLIVGIVIGRSTEYYTSQSYKPTQRLAESGKTGPATVIISGIGLGMVSTTI…
7984	GC_00001358		PV10SA01	3124	5	5	1	1	0.999655	1	0.999827	COG1883	Na+-transporting oxaloacetate/methylmalonyl-CoA decarboxylase, beta subunit (OadB)			C	Energy production and conversion	MGEFINFLGNNLADFWTYTGFANATVGHIVMILIGLFFIYLAVAKEFEPMLLIPIGFGILIGNIPFNMEAGLKVGIYEEGSVLNILYQGVTSGWYPPLIFLGIGAMTDFSALISNPKLMLIGAAAQFGIFGAYMIALAIGFDPMQAGAIGIIGGADGPTAIFLSSKLAPNLMGAIAVSAYSYMALVPVIQPPIMRLLTTKHERLIRMKPPRVVSHTEKVMFPIIGLLLTCFLVPSGLPLLGMLFFGNLLKESGVTRRLAETARGPLIDTITILLGLTVGASTQASEFLTIDSILIFALGALSFIIATASGVIFVKIFNLVLGKDNKINPLIGNAGVSAVPDSARISQVIGLEYDPTNYLLMHAMGPNVAGVIGSAVAAGILLGFLM
7985	GC_00001358		PV26FA01	3121	5	5	1	1	0.999655	1	0.999827	COG1883	Na+-transporting oxaloacetate/methylmalonyl-CoA decarboxylase, beta subunit (OadB)			C	Energy production and conversion	MGEFINFLGNNLADFWTYTGFANATVGHIVMILIGLFFIYLAVAKEFEPMLLIPIGFGILIGNIPFNMEAGLKVGIYEEGSVLNILYQGVTSGWYPPLIFLGIGAMTDFSALISNPKLMLIGAAAQFGIFGAYMIALAMGFDPMQAGAIGIIGGADGPTAIFLSSKLAPNLMGAIAVSAYSYMALVPVIQPPIMRLLTTKHERLIRMKPPRVVSHTEKVMFPIIGLLLTCFLVPSGLPLLGMLFFGNLLKESGVTRRLAETARGPLIDTITILLGLTVGASTQASEFLTIDSILIFALGALSFIIATASGVIFVKIFNLVLGKDNKINPLIGNAGVSAVPDSARISQVIGLEYDPTNYLLMHAMGPNVAGVIGSAVAAGILLGFLM
7986	GC_00001358		PV29FA01	309	5	5	1	1	0.999655	1	0.999827	COG1883	Na+-transporting oxaloacetate/methylmalonyl-CoA decarboxylase, beta subunit (OadB)			C	Energy production and conversion	MGEFINFLGNNLADFWTYTGFANATVGHIVMILIGLFFIYLAVAKEFEPMLLIPIGFGILIGNIPFNMEAGLKVGIYEEGSVLNILYQGVTSGWYPPLIFLGIGAMTDFSALISNPKLMLIGAAAQFGIFGAYMIALAMGFDPMQAGAIGIIGGADGPTAIFLSSKLAPNLMGAIAVSAYSYMALVPVIQPPIMRLLTTKHERLIRMKPPRVVSHTEKVMFPIIGLLLTCFLVPSGLPLLGMLFFGNLLKESGVTRRLAETARGPLIDTITILLGLTVGASTQASEFLTIDSILIFALGALSFIIATASGVIFVKIFNLVLGKDNKINPLIGNAGVSAVPDSARISQVIGLEYDPTNYLLMHAMGPNVAGVIGSAVAAGILLGFLM
7987	GC_00001358		PV2SA01	2292	5	5	1	1	0.999655	1	0.999827	COG1883	Na+-transporting oxaloacetate/methylmalonyl-CoA decarboxylase, beta subunit (OadB)			C	Energy production and conversion	MGEFINFLGNNLADFWTYTGFANATVGHIVMILIGLFFIYLAVAKEFEPMLLIPIGFGILIGNIPFNMEAGLKVGIYEEGSVLNILYQGVTSGWYPPLIFLGIGAMTDFSALISNPKLMLIGAAAQFGIFGAYMIALAMGFDPMQAGAIGIIGGADGPTAIFLSSKLAPNLMGAIAVSAYSYMALVPVIQPPIMRLLTTKHERLIRMKPPRVVSHTEKVMFPIIGLLLTCFLVPSGLPLLGMLFFGNLLKESGVTRRLAETARGPLIDTITILLGLTVGASTQASEFLTIDSILIFALGALSFIIATASGVIFVKIFNLVLGKDNKINPLIGNAGVSAVPDSARISQVIGLEYDPTNYLLMHAMGPNVAGVIGSAVAAGILLGFLM
7988	GC_00001358		PV2SA02	2967	5	5	1	1	0.999655	1	0.999827	COG1883	Na+-transporting oxaloacetate/methylmalonyl-CoA decarboxylase, beta subunit (OadB)			C	Energy production and conversion	MGEFINFLGNNLADFWTYTGFANATVGHIVMILIGLFFIYLAVAKEFEPMLLIPIGFGILIGNIPFNMEAGLKVGIYEEGSVLNILYQGVTSGWYPPLIFLGIGAMTDFSALISNPKLMLIGAAAQFGIFGAYMIALAMGFDPMQAGAIGIIGGADGPTAIFLSSKLAPNLMGAIAVSAYSYMALVPVIQPPIMRLLTTKHERLIRMKPPRVVSHTEKVMFPIIGLLLTCFLVPSGLPLLGMLFFGNLLKESGVTRRLAETARGPLIDTITILLGLTVGASTQASEFLTIDSILIFALGALSFIIATASGVIFVKIFNLVLGKDNKINPLIGNAGVSAVPDSARISQVIGLEYDPTNYLLMHAMGPNVAGVIGSAVAAGILLGFLM
8064	GC_00001374		PV10SA01	2182	5	5	1	1	0.998344	1	0.999171	COG1757	Na+/H+ antiporter NhaC/MleN (NhaC)			C	Energy production and conversion	MKDNKIPSPLVSLLPVFVLILLLFVTIRTFGSDALSGGSQVCLLVATAVCVLIGMAGFRRPWKDFELAVTNNIAGVSTALIILLIIGALSGAWMVSGVVPTLIYYGIQVIHPHFFLVSTCIICAVVSVMTGSSWTTIATIGIALMGIGKAQGFSEGWIAGAIISGAYFGDKVSPLSDTTILASSVTDTPLFTHIRYLMITTVPSLVITLIIFTIAGLSHEATDTGHIAEYTRILSDKFHISWWLMIVPVVTAILIARKVPSIITLFVSTALATVFALIFQPGLLCEIAGQGVEGIAALFKGGMGMLYGGTQLETGNAEINELISTRGMAGMMNTIWLIICAMCFGGAMTAGGMLGSITSVFVRFTKKRVGMVSSTVASGLFLNLATADQYISIILTGNM…
8065	GC_00001374		PV26FA01	3808	5	5	1	1	0.998344	1	0.999171	COG1757	Na+/H+ antiporter NhaC/MleN (NhaC)			C	Energy production and conversion	MKDNKIPSPLVSLLPVFVLILLLFVTIRTFGSDALSGGSQVCLLVATAVCVLIGMAGFRRSWKDFELAVTNNIAGVSTALIILLIIGALSGAWMVSGVVPTLIYYGIQVIHPHFFLVSTCIICAVVSVMTGSSWTTIATIGIALMGIGKAQGFGEGWIAGAIISGAYFGDKVSPLSDTTILASSVTDTPLFTHIRYLMITTVPSLVITLIIFTIAGLSHEATDTGHIAEYTRILSDKFHISWWLMIVPVVTAILIARKVPSIITLFVSTALATVFALIFQPGLLCEIAGQGVEGIAALFKGGMGMLYGGTQLETGNAEINELISTRGMAGMMNTIWLIICAMCFGGAMTAGGMLGSITSVFVRFTKKRVGMVSSTVASGLFLNLATADQYISIILTGNM…
8066	GC_00001374		PV29FA01	1210	5	5	1	1	0.998344	1	0.999171	COG1757	Na+/H+ antiporter NhaC/MleN (NhaC)			C	Energy production and conversion	MKDNKIPSPLVSLLPVFVLILLLFVTIRTFGSDALSGGSQVCLLVATAVCVLIGMAGFRRPWKDFELAVTNNIAGVSTALIILLIIGALSGAWMVSGVVPTLIYYGIQVIHPHFFLVSTCIICAVVSVMTGSSWTTIATIGIALMGIGKAQGFSEGWIAGAIISGAYFGDKVSPLSDTTILASSVTDTPLFTHIRYLMITTVPSLVITLIIFTIAGLSHEATDTGHIAEYTRILSDKFHISWWLMIVPVVTAILIARKVPSIITLFVSTALATVFALIFQPGLLCEIAGQGVEGIAALFKGGMGMLYGGTQLETGNAEINELISTRGMAGMMNTIWLIICAMCFGGAMTAGGMLGSITSVFVRFTKKRVGMVSSTVASGLFLNLATADQYISIILTGNM…
8067	GC_00001374		PV2SA01	1695	5	5	1	1	0.998344	1	0.999171	COG1757	Na+/H+ antiporter NhaC/MleN (NhaC)			C	Energy production and conversion	MKDNKIPSPLVSLLPVFVLILLLFVTIRTFGSDALSGGSQVCLLVATAVCVLIGMAGFRRPWKDFELAVTNNIAGVSTALIILLIIGALSGAWMVSGVVPTLIYYGIQVIHPHFFLVSTCIICAVVSVMTGSSWTTIATIGIALMGIGKAQGFSEGWIAGAIISGAYFGDKVSPLSDTTILASSVTDTPLFTHIRYLMITTVPSLVITLIIFTIAGLSHEATDTGHIAEYTRILSDKFHISWWLMIVPVVTAILIARKVPSIITLFVSTALATVFALIFQPGLLCEIAGQGVEGIAALFKGGMGMLYGGTQLETGNAEINELISTRGMAGMMNTIWLIICAMCFGGAMTAGGMLGSITSVFVRFTKKRVGMVSSTVASGLFLNLATADQYISIILTGNM…
8068	GC_00001374		PV2SA02	2370	5	5	1	1	0.998344	1	0.999171	COG1757	Na+/H+ antiporter NhaC/MleN (NhaC)			C	Energy production and conversion	MKDNKIPSPLVSLLPVFVLILLLFVTIRTFGSDALSGGSQVCLLVATAVCVLIGMAGFRRPWKDFELAVTNNIAGVSTALIILLIIGALSGAWMVSGVVPTLIYYGIQVIHPHFFLVSTCIICAVVSVMTGSSWTTIATIGIALMGIGKAQGFSEGWIAGAIISGAYFGDKVSPLSDTTILASSVTDTPLFTHIRYLMITTVPSLVITLIIFTIAGLSHEATDTGHIAEYTRILSDKFHISWWLMIVPVVTAILIARKVPSIITLFVSTALATVFALIFQPGLLCEIAGQGVEGIAALFKGGMGMLYGGTQLETGNAEINELISTRGMAGMMNTIWLIICAMCFGGAMTAGGMLGSITSVFVRFTKKRVGMVSSTVASGLFLNLATADQYISIILTGNM…
8159	GC_00001393		PV10SA01	721	5	5	1	1	0.998995	1	0.999497	COG0282	Acetate kinase (AckA) (PDB:3SK3)			C	Energy production and conversion	MKILVLNCGSSSIKYKLFDMTTKEVLAQGGIEKIGLVGSFLKLTLPNGEKKILEKDIPEHTAGIEFILNTLVSPEYGAIKSLDEINAVGHRMVHGGERFSESVLLNKEVLDAFIACNDLAPLHNPANLKGVNAVSAILPNVPQVGVFDTAFHQTMPDYAYMYAIPYELYEKYGVRRYGFHGTSHRYVSQRVCEFLGVDPKGKKIITCHIGNGGSISAIKDGKCIDTSMGLTPLEGLVMGTRSGDIDAGAVTFIMEKEGLNATGVSNLLNKKSGVLGVSGVSSDMRELEAAVAAGNPKAILAEKMYFYRIKKYIGAYAAALGGVDIILFTGGVGENQANCRSEVCEGLEFMGVKIDLEKNKVRGEEAIISADDSKVTVAVIPTDEELMIASDTLAILNK
8160	GC_00001393		PV26FA01	1255	5	5	1	1	0.998995	1	0.999497	COG0282	Acetate kinase (AckA) (PDB:3SK3)			C	Energy production and conversion	MKILVLNCGSSSIKYKLFDMTTKEVLAQGGIEKIGLVGSFLKLTLPNGEKKILEKDIPEHTAGIEFILNTLVSPEYGAIKSLDEINAVGHRMVHGGERFSESVLLNKEVLDAFIACNDLAPLHNPANLKGVNAVSAILPNVPQVGVFDTAFHQTMPDYAYMYAIPYELYEKYGVRRYGFHGTSHRYVSQRVCEFLGVDPKGKKIITCHIGNGGSISAIKDGKCIDTSMGLTPLEGLVMGTRSGDIDAGAVTFIMEKEGLNATGVSNLLNKKSGVLGVSGVSSDMRELEAAVAAGNPKAILAEKMYFYRIKKYIGAYAAALGGVDIILFTGGVGENQANCRSEVCEGLEFMGVKIDLEKNKVRGEEAIISADDSKVTVAVIPTDEELMIASDTLAILNK
8161	GC_00001393		PV29FA01	2930	5	5	1	1	0.998995	1	0.999497	COG0282	Acetate kinase (AckA) (PDB:3SK3)			C	Energy production and conversion	MKILVLNCGSSSIKYKLFDMTTKEVLAQGGIEKIGLVGSFLKLTLPNGEKKILEKDIPEHTAGIEFILNTLVSPEYGAIKSLDEINAVGHRMVHGGERFSESVLLNKEVLDAFIACNDLAPLHNPANLKGVNAVSAILPNVPQVGVFDTAFHQTMPDYAYMYAIPYELYEKYGVRRYGFHGTSHRYVSQRVCEFLGVDPKGKKIITCHIGNGGSISAIKDGKCIDTSMGLTPLEGLVMGTRSGDIDAGAVTFIMEKEGLNATGVSNLLNKKSGVLGVSGVSSDMRELEAAVAAGNPKAILAEKMYFYRIKKYIGAYAAALGGVDIILFTGGVGENQANCRSEVCGGLEFMGVKIDLEKNKVRGEEAIISADDSKVTVAVIPTDEELMIASDTLAILNK
8162	GC_00001393		PV2SA01	55	5	5	1	1	0.998995	1	0.999497	COG0282	Acetate kinase (AckA) (PDB:3SK3)			C	Energy production and conversion	MKILVLNCGSSSIKYKLFDMTTKEVLAQGGIEKIGLVGSFLKLTLPNGEKKILEKDIPEHTAGIEFILNTLVSPEYGAIKSLDEINAVGHRMVHGGERFSESVLLNKEVLDAFIACNDLAPLHNPANLKGVNAVSAILPNVPQVGVFDTAFHQTMPDYAYMYAIPYELYEKYGVRRYGFHGTSHRYVSQRVCEFLGVDPKGKKIITCHIGNGGSISAIKDGKCIDTSMGLTPLEGLVMGTRSGDIDAGAVTFIMEKEGLNATGVSNLLNKKSGVLGVSGVSSDMRELEAAVAAGNPKAILAEKMYFYRIKKYIGAYAAALGGVDIILFTGGVGENQANCRSEVCEGLEFMGVKIDLEKNKVRGEEAIISADDSKVTVAVIPTDEELMIASDTLAILNK
8163	GC_00001393		PV2SA02	730	5	5	1	1	0.998995	1	0.999497	COG0282	Acetate kinase (AckA) (PDB:3SK3)			C	Energy production and conversion	MKILVLNCGSSSIKYKLFDMTTKEVLAQGGIEKIGLVGSFLKLTLPNGEKKILEKDIPEHTAGIEFILNTLVSPEYGAIKSLDEINAVGHRMVHGGERFSESVLLNKEVLDAFIACNDLAPLHNPANLKGVNAVSAILPNVPQVGVFDTAFHQTMPDYAYMYAIPYELYEKYGVRRYGFHGTSHRYVSQRVCEFLGVDPKGKKIITCHIGNGGSISAIKDGKCIDTSMGLTPLEGLVMGTRSGDIDAGAVTFIMEKEGLNATGVSNLLNKKSGVLGVSGVSSDMRELEAAVAAGNPKAILAEKMYFYRIKKYIGAYAAALGGVDIILFTGGVGENQANCRSEVCEGLEFMGVKIDLEKNKVRGEEAIISADDSKVTVAVIPTDEELMIASDTLAILNK
8214	GC_00001404		PV10SA01	1931	5	5	1	1	0.998954	1	0.999477	COG0388	Omega-amidase YafV/Nit2, hydrolyzes alpha-ketoglutaramate (Nit2) (PUBMED:28373563)			C	Energy production and conversion	MEPMHKINKVEVRNLQIEDYIQLSQSFKRVYADKDVFWTHEQIETLIRIFPEGQVVTVVDDKIVGCALSIIVDYDMVKGDHTYAKVTGNETFCTHNPEGNILYGIEVFIHPDYRGLRLARRMYEYRKELCEKLNLKAIMFGGRIPNYYKYADTMRPKEYLDKVRSREIYDPVLTFQLSNDFHVRRVMKNYLPNDEESKHCATLLQWDNIYYQEPTQDYVDKKTTVRVGLVQWQMRPYKTLDDVFEQVEFFVDAVSDYKSDFVLFPEYFNAPLMAKFNHLGEAQSIRGLAQYTEEVRDRFINLAISYNINIITGSMPYVKEDGGLYNVGFLVRRDGSYEMYEKVHVTPDEIKSWGLSGGKMVQTFDTDCAKIGILICYDVEFPELSRIMADQGMQILFVP…
8215	GC_00001404		PV26FA01	4124	5	5	1	1	0.998954	1	0.999477	COG0388	Omega-amidase YafV/Nit2, hydrolyzes alpha-ketoglutaramate (Nit2) (PUBMED:28373563)			C	Energy production and conversion	MEPMHKINKVEVRNLQIEDYIQLSQSFKRVYADKDVFWTHEQIETLIRIFPEGQVVTVVDDKIVGCALSIIVDYDMVKGDHTYAKVTGNETFCTHNPEGNILYGIEVFIHPDYRGLRLARRMYEYRKELCEKLNLKAIMFGGRIPNYYKYADTMRPKEYLDKVRSREIYDPVLTFQLSNDFHVRRVMKNYLPNDEESKHCATLLQWDNIYYQEPTQDYVDKKTTVRVGLVQWQMRPYKTLDDVFEQVEFFVDAVSDYKSDFVLFPEYFNAPLMAKFNHLGEAQSIRGLAQYTEEVRDRFINLAISYNINIITGSMPYVKEDGGLYNVGFLVRRDGSYEMYEKVHVTPDEIKSWGLSGGKMVQTFDTDCAKIGILICYDVEFPELSRIMADQGMQILFVP…
8216	GC_00001404		PV29FA01	1434	5	5	1	1	0.998954	1	0.999477	COG0388	Omega-amidase YafV/Nit2, hydrolyzes alpha-ketoglutaramate (Nit2) (PUBMED:28373563)			C	Energy production and conversion	MEPMHKINKVEVRNLQIEDYIQLSQSFKRVYADKDVFWTHEQIETLIRIFPEGQVVTVVDDKIVGCALSIIVDYDMVKGDHTYAKVTGNETFCTHNPEGNILYGIEVFIHPDYRGLRLARRMYEYRKELCEKLNLKAIMFGGRIPNYYKYADTMRPKEYLDKVRSREIYDPVLTFQLSNDFHVRRVMKNYLPNDEESKHCATLLQWDNIYYQEPTQDYVDKKTTVRVGLVQWQMRPYKTLDDVFEQVEFFVDAVSDYKSDFVLFPEYFNAPLMAKFNHLGEAQSIRGLAQYTEEVRDRFINLAISYNINIITGSMPYVKEDGGLYNVGFLVRRDGSYEMYEKVHVTPDEIKSWGLSGGKMVQTFDTDCAKIGILICYDVEFPELSRIMADQGMQILFVP…
8217	GC_00001404		PV2SA01	1500	5	5	1	1	0.998954	1	0.999477	COG0388	Omega-amidase YafV/Nit2, hydrolyzes alpha-ketoglutaramate (Nit2) (PUBMED:28373563)			C	Energy production and conversion	MEPMHKINKVEVRNLQIEDYIQLSQSFKRVYADKDVFWTHEQIETLIRIFPEGQVVTVVDDKIVGCALSIIVDYDMVKGDHTYAKVTGNETFCTHNPEGNILYGIEVFIHPDYRGLRLARRMYEYRKELCEKLNLKAIMFGGRIPNYYKYADTMRPKEYLDKVRSREIYDPVLTFQLSNDFHVRRVMKNYLPNDEESKHCATLLQWDNIYYQEPTQDYVDKKTTVRVGLVQWQMRPYKTLDDVFEQVEFFVDAVSDYKSDFVLFPEYFNAPLMAKFNHLGEAQSIRGLAQYTEEVRDRFINLAISYNINIITGSMPYVKEDGGLYNVGFLVRRDGSYEMYEKVHVTPDEIKSWGLSGGKMVQTFDTDCAKIGILICYDVEFPELSRIMADQGMQILFVP…
8218	GC_00001404		PV2SA02	2175	5	5	1	1	0.998954	1	0.999477	COG0388	Omega-amidase YafV/Nit2, hydrolyzes alpha-ketoglutaramate (Nit2) (PUBMED:28373563)			C	Energy production and conversion	MEPMHKINKVEVRNLQIEDYIQLSQSFKRVYADKDVFWTHEQIETLIRIFPEGQVVTVVDDKIVGCALSIIVDYDMVKGDHTYAKVTGNETFCTHNPEGNILYGIEVFIHPDYRGLRLARRMYEYRKELCEKLNLKAIMFGGRIPNYYKYADTMRPKEYLDKVRSREIYDPVLTFQLSNDFHVRRVMKNYLPNDEESKHCATLLQWDNIYYQEPTQDYVDKKTTVRVGLVQWQMRPYKTLDDVFEQVEFFVDAVSDYKSDFVLFPEYFNAPLMAKFNHLGEAQSIRGLAQYTEEVRDRFINLAISYNINIITGSMPYVKEDGGLYNVGFLVRRDGSYEMYEKVHVTPDEIKSWGLSGGKMVQTFDTDCAKIGILICYDVEFPELSRIMADQGMQILFVP…
8864	GC_00001534		PV10SA01	4143	5	5	1	1	0.998675	1	0.999337	COG0280	Phosphotransacetylase (includes Pta, EutD and phosphobutyryltransferase) (Pta) (PDB:1QZT) (PUBMED:28754323)			C	Energy production and conversion	MEPIQDFAGLICRLRSLKERKRVVVVCPNDPHTEYVITRSLHEGFADFLLVADTPHLLNSEYIRLQYPDHVKVYEATSPDKAAQEAVSLIREGHADVLMKGIINTDNLLRAVLNKEHGILPKGNVLSHITVAQIPMYKKLLFFSDAAVIPRPTLEQFEAMLRYDLEVCRRMGIEAPRVALIHCTEKVNEKFPHTLDYVTLKERAAAGAYGNMYLDGPMDVKTACDAHSGEVKGISSPVVGHADLLIFPNIESGNTFYKTVSLFGDANMAGMLRGTAFPVVVPSRADSGNSKYYSLALACVAG
8865	GC_00001534		PV26FA01	2077	5	5	1	1	0.998675	1	0.999337	COG0280	Phosphotransacetylase (includes Pta, EutD and phosphobutyryltransferase) (Pta) (PDB:1QZT) (PUBMED:28754323)			C	Energy production and conversion	MEPIQDFAGLICRLRSLKERKRVVVVCPNDPHTEYVITRSLHEGFADFLLVADTPHLLNSEYIRLQYPDHVKVYEATSPDKAAQEAVSLIREGHADVLMKGIINTDNLLRAVLNKEHGILPKGNVLSHITVAQIPMYKKLLFFSDAAVIPRPTLEQFEAMLRYDLEVCRRMGIEAPRVALIHCTEKVNEKFPHTLDYVTLKERAAAGAYGNMYLDGPMDVKTACDAHSGEVKGISSPVVGHADLLIFPNIESGNTFYKTVSLFGDANMAGMLRGTASPVVVPSRADSGNSKYYSLALACVAG
8866	GC_00001534		PV29FA01	3390	5	5	1	1	0.998675	1	0.999337	COG0280	Phosphotransacetylase (includes Pta, EutD and phosphobutyryltransferase) (Pta) (PDB:1QZT) (PUBMED:28754323)			C	Energy production and conversion	MEPIQDFAGLICRLRSLKERKRVVVVCPNDPHTEYVITRSLHEGFADFLLVADTPHLLNSEYIRLQYPDHVKVYEATSPDKAAQEAVSLIREGHADVLMKGIINTDNLLRAVLNKEHGILPKGNVLSHITVAQIPMYKKLLFFSDAAVIPRPTLEQFEAMLRYDLEVCRRMGIEAPRVALIHCTEKVNEKFPHTLDYVTLKERAAAGAYGNMYLDGPMDVKTACDAHSGEVKGISSPVVGHADLLIFPNIESGNTFYKTVSLFGDANMAGMLRGTASPVVVPSRADSGNSKYYSLALACVAG
8867	GC_00001534		PV2SA01	3440	5	5	1	1	0.998675	1	0.999337	COG0280	Phosphotransacetylase (includes Pta, EutD and phosphobutyryltransferase) (Pta) (PDB:1QZT) (PUBMED:28754323)			C	Energy production and conversion	MEPIQDFAGLICRLRSLKERKRVVVVCPNDPHTEYVITRSLHEGFADFLLVADTPHLLNSEYIRLQYPDHVKVYEATSPDKAAQEAVSLIREGHADVLMKGIINTDNLLRAVLNKEHGILPKGNVLSHITVAQIPMYKKLLFFSDAAVIPRPTLEQFEAMLRYDLEVCRRMGIEAPRVALIHCTEKVNEKFPHTLDYVTLKERAAAGAYGNMYLDGPMDVKTACDAHSGEVKGISSPVVGHADLLIFPNIESGNTFYKTVSLFGDANMAGMLRGTASPVVVPSRADSGNSKYYSLALACVAG
8868	GC_00001534		PV2SA02	4115	5	5	1	1	0.998675	1	0.999337	COG0280	Phosphotransacetylase (includes Pta, EutD and phosphobutyryltransferase) (Pta) (PDB:1QZT) (PUBMED:28754323)			C	Energy production and conversion	MEPIQDFAGLICRLRSLKERKRVVVVCPNDPHTEYVITRSLHEGFADFLLVADTPHLLNSEYIRLQYPDHVKVYEATSPDKAAQEAVSLIREGHADVLMKGIINTDNLLRAVLNKEHGILPKGNVLSHITVAQIPMYKKLLFFSDAAVIPRPTLEQFEAMLRYDLEVCRRMGIEAPRVALIHCTEKVNEKFPHTLDYVTLKERAAAGAYGNMYLDGPMDVKTACDAHSGEVKGISSPVVGHADLLIFPNIESGNTFYKTVSLFGDANMAGMLRGTASPVVVPSRADSGNSKYYSLALACVAG
9034	GC_00001568		PV10SA01	93	5	5	1	1	0.998974	1	0.999487	COG1454	Alcohol dehydrogenase, class IV (EutG) (PDB:6AHC)			C	Energy production and conversion	MKANPVFSLYIPTKLVFGCGEIKKLSSEKLPGKKALVVISSGTSMRKYGYLERVLAQLRLNNVETLVYDKILPNPIKEHVMEAAAICWEEKCDFVVGLGGGSSIDSAKSIAVMACNDGDYWDYVSGGSGKGRPVTKALPIIAIPTTAGTGTEMDPWTVITHETAQEKIGFGCQLTFPTLSIVDPELMVSIPPHLTAYQGFDAFFHAAEGFIANCATPISDLYALEAIRLIYKYLPVAVADGKNLKARAKIAWASTLAGMVEATSSCTSEHSLEHAMSAYYPQLPHGAGLIALSEAYFETFRHDCTKRYMKMAEMMTQKKSNRPSDFIDALITLQKECKVHSIKLSEFGIQSEDFPKFLQNARDTMGGLFTLDPRPITDEEILHIFKNSYK
9035	GC_00001568		PV26FA01	1525	5	5	1	1	0.998974	1	0.999487	COG1454	Alcohol dehydrogenase, class IV (EutG) (PDB:6AHC)			C	Energy production and conversion	MKANPVFSLYIPTKLVFGCGEIKKLSSEKLPGKKALVVISSGTSMRKYGYLERVLAQLRLNNVETLVYDKILPNPIKEHVMEAAAICREEKCDFVVGLGGGSSIDSAKSIAVMACNDGDYWDYVSGGSGKGRPVTKALPIIAIPTTAGTGTEMDPWTVITHETAQEKIGFGCQLTFPTLSIVDPELMVSIPPHLTAYQGFDAFFHAAEGFIANCATPISDLYALEAIRLIYKYLPVAVADGKNLKARAKIAWASTLAGMVEATSSCTSEHSLEHAMSAYYPQLPHGAGLIALSEAYFETFRHDCTKRYMKMAEMMTQKKSNRPSDFIDALITLQKECKVHSIKLSEFGIQSEDFPKFLQNARDTMGGLFTLDPRPITDEEILHIFKNSYK
9036	GC_00001568		PV29FA01	3124	5	5	1	1	0.998974	1	0.999487	COG1454	Alcohol dehydrogenase, class IV (EutG) (PDB:6AHC)			C	Energy production and conversion	MKANPVFSLYIPTKLVFGCGEIKKLSSEKLPGKKALVVISSGTSMRKYGYLERVLAQLRLNNVETLVYDKILPNPIKEHVMEAAAICREEKCDFVVGLGGGSSIDSAKSIAVMACNDGDYWDYVSGGSGKGRPVTKALPIIAIPTTAGTGTEMDPWTVITHETAQEKIGFGCQLTFPTLSIVDPELMVSIPPHLTAYQGFDAFFHAAEGFIANCATPISDLYALEAIRLIYKYLPVAVADGKNLKARAKIAWASTLAGMVEATSSCTSEHSLEHAMSAYYPQLPHGAGLIALSEAYFETFRHDCTKRYMKMAEMMTQKKSNRPSDFIDALITLQKECKVHSIKLSEFGIQSEDFPKFLQNARDTMGGLFTLDPRPITDEEILHIFKNSYK
9037	GC_00001568		PV2SA01	3696	5	5	1	1	0.998974	1	0.999487	COG1454	Alcohol dehydrogenase, class IV (EutG) (PDB:6AHC)			C	Energy production and conversion	MKANPVFSLYIPTKLVFGCGEIKKLSSEKLPGKKALVVISSGTSMRKYGYLERVLAQLRLNNVETLVYDKILPNPIKEHVMEAAAICREEKCDFVVGLGGGSSIDSAKSIAVMACNDGDYWDYVSGGSGKGRPVTKALPIIAIPTTAGTGTEMDPWTVITHETAQEKIGFGCQLTFPTLSIVDPELMVSIPPHLTAYQGFDAFFHAAEGFIANCATPISDLYALEAIRLIYKYLPVAVADGKNLKARAKIAWASTLAGMVEATSSCTSEHSLEHAMSAYYPQLPHGAGLIALSEAYFETFRHDCTKRYMKMAEMMTQKKSNRPSDFIDALITLQKECKVHSIKLSEFGIQSEDFPKFLQNARDTMGGLFTLDPRPITDEEILHIFKNSYK
9038	GC_00001568		PV2SA02	471	5	5	1	1	0.998974	1	0.999487	COG1454	Alcohol dehydrogenase, class IV (EutG) (PDB:6AHC)			C	Energy production and conversion	MKANPVFSLYIPTKLVFGCGEIKKLSSEKLPGKKALVVISSGTSMRKYGYLERVLAQLRLNNVETLVYDKILPNPIKEHVMEAAAICREEKCDFVVGLGGGSSIDSAKSIAVMACNDGDYWDYVSGGSGKGRPVTKALPIIAIPTTAGTGTEMDPWTVITHETAQEKIGFGCQLTFPTLSIVDPELMVSIPPHLTAYQGFDAFFHAAEGFIANCATPISDLYALEAIRLIYKYLPVAVADGKNLKARAKIAWASTLAGMVEATSSCTSEHSLEHAMSAYYPQLPHGAGLIALSEAYFETFRHDCTKRYMKMAEMMTQKKSNRPSDFIDALITLQKECKVHSIKLSEFGIQSEDFPKFLQNARDTMGGLFTLDPRPITDEEILHIFKNSYK
9359	GC_00001633		PV10SA01	2426	5	5	1	1	0.999539	1	0.99977	COG1757	Na+/H+ antiporter NhaC/MleN (NhaC)			C	Energy production and conversion	MNGEKLTPITNKPSLWALSPLLVFLCLYLVTSIIVNDFYKVPITIAFMVSSVYAVCITKGLSLNERMLQYSIGAANKNIILMIWIFILAGAFAQSAKDIGAIDATVNLTLLLLPDNLLLAGIFLAACFISLSIGTSVGTIVALVPVAAGIAEKTDMNLAFMTGIVVGGAFFGDNLSFISDTTIAATRTQGCAMRDKFRVNFMIALPAALMVFGYYIFRGMDVMTTHDIQSVEWIKILPYLVVLGTAIAGMNVALVLILGIATTGVIGLFTGSIGLFDWLGSMGTGITGMGELIIITLMAGGMLELIRFNGGVDYIIQKLTKHVNSKRGAELCIAALVSIANFCTANNTIAIITVGPLANDIATRYRVDKRKSASILDTFSCVIQGIIPYGAQMLIAAKL…
9360	GC_00001633		PV26FA01	3668	5	5	1	1	0.999539	1	0.99977	COG1757	Na+/H+ antiporter NhaC/MleN (NhaC)			C	Energy production and conversion	MNGEKLTPITNKPSLWALSPLLVFLCLYLVTSIIVNDFYKVPITIAFMVSSVYAVCITKGLSLNERMLQYSIGAANKNIILMIWIFILAGAFAQSAKDIGAIDATVNLTLLLLPDNLLLAGIFLAACFISLSIGTSVGTIVALVPVAAGIAEKTDMNLAFMTGIVVGGAFFGDNLSFISDTTIAATRTQGCAMRDKFRVNFMIALPAALMVFGYYIFRGMDVMTTHDIQSVEWIKILPYLVVLGTAIAGMNVALVLILGIATTGVIGLFTGSIGLFDWLGSMGTGITGMGELIIITLMAGGMLELIRFNGGVDYIIQKLTKHVNSKRGAELCIAALVSIANFCTANNTIAIITVGPLANDIATRYRVDKRKSASILDTFSCVIQGIIPYGAQMLIAAKL…
9361	GC_00001633		PV29FA01	1089	5	5	1	1	0.999539	1	0.99977	COG1757	Na+/H+ antiporter NhaC/MleN (NhaC)			C	Energy production and conversion	MNGEKLTPITNKPSLWALSPLLVFLCLYLVTSIIVNDFYKVPITIAFMVSSVYAVCITKGLSLNERMLQYSIGAANKNIMLMIWIFILAGAFAQSAKDIGAIDATVNLTLLLLPDNLLLAGIFLAACFISLSIGTSVGTIVALVPVAAGIAEKTDMNLAFMTGIVVGGAFFGDNLSFISDTTIAATRTQGCAMRDKFRVNFMIALPAALMVFGYYIFRGMDVMTTHDIQSVEWIKILPYLVVLGTAIAGMNVALVLILGIATTGVIGLFTGSIGLFDWLGSMGTGITGMGELIIITLMAGGMLELIRFNGGVDYIIQKLTKHVNSKRGAELCIAALVSIANFCTANNTIAIITVGPLANDIATRYRVDKRKSASILDTFSCVIQGIIPYGAQMLIAAKL…
9362	GC_00001633		PV2SA01	1372	5	5	1	1	0.999539	1	0.99977	COG1757	Na+/H+ antiporter NhaC/MleN (NhaC)			C	Energy production and conversion	MNGEKLTPITNKPSLWALSPLLVFLCLYLVTSIIVNDFYKVPITIAFMVSSVYAVCITKGLSLNERMLQYSIGAANKNIMLMIWIFILAGAFAQSAKDIGAIDATVNLTLLLLPDNLLLAGIFLAACFISLSIGTSVGTIVALVPVAAGIAEKTDMNLAFMTGIVVGGAFFGDNLSFISDTTIAATRTQGCAMRDKFRVNFMIALPAALMVFGYYIFRGMDVMTTHDIQSVEWIKILPYLVVLGTAIAGMNVALVLILGIATTGVIGLFTGSIGLFDWLGSMGTGITGMGELIIITLMAGGMLELIRFNGGVDYIIQKLTKHVNSKRGAELCIAALVSIANFCTANNTIAIITVGPLANDIATRYRVDKRKSASILDTFSCVIQGIIPYGAQMLIAAKL…
9363	GC_00001633		PV2SA02	2047	5	5	1	1	0.999539	1	0.99977	COG1757	Na+/H+ antiporter NhaC/MleN (NhaC)			C	Energy production and conversion	MNGEKLTPITNKPSLWALSPLLVFLCLYLVTSIIVNDFYKVPITIAFMVSSVYAVCITKGLSLNERMLQYSIGAANKNIMLMIWIFILAGAFAQSAKDIGAIDATVNLTLLLLPDNLLLAGIFLAACFISLSIGTSVGTIVALVPVAAGIAEKTDMNLAFMTGIVVGGAFFGDNLSFISDTTIAATRTQGCAMRDKFRVNFMIALPAALMVFGYYIFRGMDVMTTHDIQSVEWIKILPYLVVLGTAIAGMNVALVLILGIATTGVIGLFTGSIGLFDWLGSMGTGITGMGELIIITLMAGGMLELIRFNGGVDYIIQKLTKHVNSKRGAELCIAALVSIANFCTANNTIAIITVGPLANDIATRYRVDKRKSASILDTFSCVIQGIIPYGAQMLIAAKL…
9564	GC_00001674		PV10SA01	4227	5	5	1	1	0.996354	1	0.998174	COG1454	Alcohol dehydrogenase, class IV (EutG) (PDB:6AHC)			C	Energy production and conversion	MINRFVLNEVSYFGPGAREVLPQEIKRLGLHKAFVATDKDLIKFGVADKVLKVLENAGIPYEIFSEIKPNPTVSNVKAGVEAFAKSGADFILAIGGGSSIDTSKAIGIITNNPDFSDVVSLEGVAPTRKKSVPIIALPTTAGTAAEVTINYVITDEENHKKMVCVDPNDIPAIAIVDAELMYTLPKGLTASTGLDALTHAIEGLITKGAWEMSDMFEIKAIEMIARYLETAVFEPTNAEARNGMAVAQYIAGMAFSNVGLGVVHGMAHPLGAIFDIPHGVANALLLPVIMEFNAPAALSKYVDIAKAMNVYKDGMSREEAAKAAVEAVKALSVKVGIPQHLSELGIKEEDLPRLAASAIADVCTPGNPREVTEEIILELYKKAF
9565	GC_00001674		PV26FA01	2009	5	5	1	1	0.996354	1	0.998174	COG1454	Alcohol dehydrogenase, class IV (EutG) (PDB:6AHC)			C	Energy production and conversion	MINRFVLNEVSYFGPGAREVLPQEIKRLGLHKAFVATDKDLIKFGVADKVLKVLENAGIPYEIFSEIKPNPTVSNVKAGVEAFAKSGADFILAIGGGSSIDTSKAIGIITNNPDFSDVVSLEGVAPTRKKSVPIIALPTTAGTAAEVTINYVITDEENHKKMVCVDPNDIPAIAIVDAELMYTLPKGLTASTGLDALTHAIEGLITKGAWEMSDMFEIKAIEMIARYLETAVFEPTNAEARNGMAVAQYIAGMAFSNVGLGVVHGMAHPLGAIFDIPHGVANALLLPVIMEFNAPAALSKYVDIAKAMNVYKDGMSREEAAKAAVEAVKALSVKVGIPQHLSELGIKEEDLPRLAASAIADVCTPGNPREVTEEIILELYKKAF
9566	GC_00001674		PV29FA01	3473	5	5	1	1	0.996354	1	0.998174	COG1454	Alcohol dehydrogenase, class IV (EutG) (PDB:6AHC)			C	Energy production and conversion	MINRFVLNEVSYFGPGAREVLPQEIKRLGLHKAFVATDKDLIKFGVADKVLKVLENAGIPYEIFSEIKPNPTVSNVKAGVEAFAKSGADFILAIGGGSSIDTSKAIGIITNNPDFSDVVSLEGVAPTRKKSVPIIALPTTAGTAAEVTINYVITDEENHKKMVCVDPNDIPAIAIVDAELMYTLPKGLTASTGLDALTHAIEGLITKGAWEMSDMFEIKAIEMIARYLETAVFEPTNAEARNGMAVAQYIAGMAFSNVGLGVVHGMAHPLGAIFDIPHGVANALLLPVIMEFNAPAALSKYVDIAKAMNVYKDGMSREEAAKAAVEAVKALSVKVGIPQHLSELGIKEEDLPRLAASAIADVCTPGNPREVTEEIILELYKKAF
9567	GC_00001674		PV2SA01	4113	5	5	1	1	0.996354	1	0.998174	COG1454	Alcohol dehydrogenase, class IV (EutG) (PDB:6AHC)			C	Energy production and conversion	MINRFVLNEVSYFGPGAREVLPQEIKRLGLHKAFVATDKDLIKFGVADKVLKVLENAGIPYEIFSEIKPNPTVSNVKAGVEAFAKSGADFILAIGGGSSIDTSKAIGIITNNPDFSDVVSLEGVAPTKKKSVPIIALPTTAGTAAEVTINYVITDEENHKKMVCVDPNDIPAIAIVDAELMYTLPKGLTASTGLDALTHAIEGLITKGAWEMSDMFEIKAIEMIARYLETAVFEPTNAEARNGMAVAQYIAGMAFSNVGLGVVHGMAHPLGAIFDIPHGVANALLLPVIMEFNAPAALPKYVDIAKAMNVYKDGMSQEEAAKAAVEAVKALSVKVGIPQHLSELGIKEEDLPRLAASAIADVCTPGNPREVTEEIILELYKKAF
9568	GC_00001674		PV2SA02	124	5	5	1	1	0.996354	1	0.998174	COG1454	Alcohol dehydrogenase, class IV (EutG) (PDB:6AHC)			C	Energy production and conversion	MINRFVLNEVSYFGPGAREVLPQEIKRLGLHKAFVATDKDLIKFGVADKVLKVLENAGIPYEIFSEIKPNPTVSNVKAGVEAFAKSGADFILAIGGGSSIDTSKAIGIITNNPDFSDVVSLEGVAPTKKKSVPIIALPTTAGTAAEVTINYVITDEENHKKMVCVDPNDIPAIAIVDAELMYTLPKGLTASTGLDALTHAIEGLITKGAWEMSDMFEIKAIEMIARYLETAVFEPTNAEARNGMAVAQYIAGMAFSNVGLGVVHGMAHPLGAIFDIPHGVANALLLPVIMEFNAPAALPKYVDIAKAMNVYKDGMSQEEAAKAAVEAVKALSVKVGIPQHLSELGIKEEDLPRLAASAIADVCTPGNPREVTEEIILELYKKAF
9804	GC_00001722		PV10SA01	3322	5	5	1	1	0.995257	1	0.997623	COG0388	Omega-amidase YafV/Nit2, hydrolyzes alpha-ketoglutaramate (Nit2) (PUBMED:28373563)			C	Energy production and conversion	MKITILQRNIEWANPQANIARADEAISCLLDADLFVLPEMFSTGFCTQPEGIAESADSETLHWMKRKAAERNCAIAGSVAVCENGNYYNRFYFVHPDGAVQHYDKKHLFTFGGEHKRFTAGTERVVVNFRGVRILLEVCYDLRFPVWSRNLGDYDMILYVASWPTPRVDAWSALLRARAIENQCYVAGVNRMGTDPACEYSGGSAIIDPYGKTIAECPWSRESAVSADIDMEALQAFRKKFPVLDDADPFTLI
9805	GC_00001722		PV26FA01	2893	5	5	1	1	0.995257	1	0.997623	COG0388	Omega-amidase YafV/Nit2, hydrolyzes alpha-ketoglutaramate (Nit2) (PUBMED:28373563)			C	Energy production and conversion	MKITILQRNIEWANPQANIARADEAISCLLDADLFVLPEMFSTGFCTQPEGIAESADSETLHWMKRKAAERNCAIAGSVAVCENGNYYNRFYFVHPDGAVQHYDKKHLFTFGGEHKRFTAGTERVVVNFRGVRILLEVCYDLRFPVWSRNLGDYDMILYVASWPTPRVDAWSALLRARAIENQCYVAGVNRMGTDPACEYSGGSAIIDPYGKTIAECPWSRESAVSADIDMEALQAFRKKFPVLDDADPFTLI
9806	GC_00001722		PV29FA01	102	5	5	1	1	0.995257	1	0.997623	COG0388	Omega-amidase YafV/Nit2, hydrolyzes alpha-ketoglutaramate (Nit2) (PUBMED:28373563)			C	Energy production and conversion	MKITILQRNIEWANPQANIARADEAISCLPDADLFVLPEMFSTGFCTQPEGIAESADSETLHWMKRKAAERNCAIAGSVAVCENGNYYNRFYFVHPDGAVQHYDKKHLFTFGGEHKRFTAGTERVVVNFRGVRILLEVCYDLRFPVWSRNLGDYDMILYVASWPTPRVDAWSALLRARAIENQCYVAGVNRMGVDPACEYSGGSAIIDPYGKTIAECPWSRESAVSADIDMEALQAFRKKFPVLDDADPFTLI
9807	GC_00001722		PV2SA01	2554	5	5	1	1	0.995257	1	0.997623	COG0388	Omega-amidase YafV/Nit2, hydrolyzes alpha-ketoglutaramate (Nit2) (PUBMED:28373563)			C	Energy production and conversion	MKITILQRNIEWANPQANIARADEAISCLPDADLFVLPEMFSTGFCTQPEGIAESADSETLHWMKRKAAERNCAIAGSVAVCENGNYYNRFYFVHPDGAVQHYDKKHLFTFGGEHKRFTAGTERVVVNFRGVRILLEVCYDLRFPVWSRNLGDYDMILYVASWPTPRVDAWSALLRARAIENQCYVAGVNRMGVDPACEYSGGSAIIDPYGKTIAECPWSRESAVSADIDMEALQAFRKKFPVLDDADPFTLI
9808	GC_00001722		PV2SA02	3229	5	5	1	1	0.995257	1	0.997623	COG0388	Omega-amidase YafV/Nit2, hydrolyzes alpha-ketoglutaramate (Nit2) (PUBMED:28373563)			C	Energy production and conversion	MKITILQRNIEWANPQANIARADEAISCLPDADLFVLPEMFSTGFCTQPEGIAESADSETLHWMKRKAAERNCAIAGSVAVCENGNYYNRFYFVHPDGAVQHYDKKHLFTFGGEHKRFTAGTERVVVNFRGVRILLEVCYDLRFPVWSRNLGDYDMILYVASWPTPRVDAWSALLRARAIENQCYVAGVNRMGVDPACEYSGGSAIIDPYGKTIAECPWSRESAVSADIDMEALQAFRKKFPVLDDADPFTLI
9934	GC_00001748		PV10SA01	2698	5	5	1	1	0.9986	1	0.9993	COG1294	Cytochrome bd-type quinol oxidase, subunit 2 (AppB) (PDB:6RKO)			C	Energy production and conversion	MDYIFLQNYWWFLVSLLGALLVFLLFVQGGNSLLFTLGRNDEERALLVNSTGRKWEFTFTTLVTFGGAFFASFPLFYSTSFGGAYWLWMIILFSFVLQAVSYEFQSKLGNLLGKHTYQWFLVINGIVGPLLLGGAVATFFTGSNFLVNKGNMGNELMPVISSWANGWHGLDALTNPWNLVLGFAVFFLARLLGNLYFINNIRDKDLIPRCRRQLITDAIPFLILFLAFVIRTLLADGFAVNPETKEVYMEPYKYFINLMDMPLLLVLFLSGVVGVLWGIGRAVFSKTATNGIWFTGIGVVLTVLALLLCAGYNNTAYYPSTADLQSSLTLANSCSSEFTLRTMAYVSILVPFVLAYIIYAWRAIDRKPITAKELEQDGHAY
9935	GC_00001748		PV26FA01	3483	5	5	1	1	0.9986	1	0.9993	COG1294	Cytochrome bd-type quinol oxidase, subunit 2 (AppB) (PDB:6RKO)			C	Energy production and conversion	MDYIFLQNYWWFLVSLLGALLVFLLFVQGGNSLLFTLGRNDEERALLVNSTGRKWEFTFTTLVTFGGAFFASFPLFYSTSFGGAYWLWMIVLFSFVLQAVSYEFQSKLGNLLGKHTYQWFLVINGIVGPLLLGGAVATFFTGSNFLVNKGNMGNELMPVISSWANGWHGLDALTNPWNLVLGFAVFFLARLLGNLYFINNIRDKDLIPRCRRQLITDAIPFLILFLAFVIRTLLADGFAVNPETKEVYMEPYKYFINLMDMPLLLVLFLSGVVGVLWGIGRAVFSKTATNGIWFTGIGVVLTVLALLLCAGYNNTAYYPSTADLQSSLTLANSCSSEFTLRTMAYVSILVPFVLAYIIYAWRAIDRKPITAKELEQDGHAY
9936	GC_00001748		PV29FA01	900	5	5	1	1	0.9986	1	0.9993	COG1294	Cytochrome bd-type quinol oxidase, subunit 2 (AppB) (PDB:6RKO)			C	Energy production and conversion	MDYIFLQNYWWFLVSLLGALLVFLLFVQGGNSLLFTLGRNDEERALLVNSTGRKWEFTFTTLVTFGGAFFASFPLFYSTSFGGAYWLWMIILFSFVLQAVSYEFQSKLGNLLGKHTYQWFLVINGIVEPLLLGGAVATFFTGSNFLVNKGNMGNELMPVISSWANGWHGLDALTNPWNLVLGFAVFFLARLLGNLYFINNIRDKDLIPRCRRQLITDAIPFLILFLAFVIRTLLADGFAVNPETKEVYMEPYKYFINLMDMPLLLVLFLSGVVGVLWGIGRAVFSKTATNGIWFTGIGVVLTVLALLLCAGYNNTAYYPSTADLQSSLTLANSCSSEFTLRTMAYVSILVPFVLAYIIYAWRAIDRKPITAKELEQDGHAY
9937	GC_00001748		PV2SA01	1180	5	5	1	1	0.9986	1	0.9993	COG1294	Cytochrome bd-type quinol oxidase, subunit 2 (AppB) (PDB:6RKO)			C	Energy production and conversion	MDYIFLQNYWWFLVSLLGALLVFLLFVQGGNSLLFTLGRNDEERALLVNSTGRKWEFTFTTLVTFGGAFFASFPLFYSTSFGGAYWLWMIILFSFVLQAVSYEFQSKLGNLLGKHTYQWFLVINGIVGPLLLGGAVATFFTGSNFLVNKGNMGNELMPVISSWANGWHGLDALTNPWNLVLGFAVFFLARLLGNLYFINNIRDKDLIPRCRRQLITDAIPFLILFLAFVIRTLLADGFAVNPETKEVYMEPYKYFINLMDMPLLLVLFLSGVVGVLWGIGRAVFSKTATNGIWFTGIGVVLTVLALLLCAGYNNTAYYPSTADLQSSLTLANSCSSEFTLRTMAYVSILVPFVLAYIIYAWRAIDRKPITAKELEQDGHAY
9938	GC_00001748		PV2SA02	1855	5	5	1	1	0.9986	1	0.9993	COG1294	Cytochrome bd-type quinol oxidase, subunit 2 (AppB) (PDB:6RKO)			C	Energy production and conversion	MDYIFLQNYWWFLVSLLGALLVFLLFVQGGNSLLFTLGRNDEERALLVNSTGRKWEFTFTTLVTFGGAFFASFPLFYSTSFGGAYWLWMIILFSFVLQAVSYEFQSKLGNLLGKHTYQWFLVINGIVGPLLLGGAVATFFTGSNFLVNKGNMGNELMPVISSWANGWHGLDALTNPWNLVLGFAVFFLARLLGNLYFINNIRDKDLIPRCRRQLITDAIPFLILFLAFVIRTLLADGFAVNPETKEVYMEPYKYFINLMDMPLLLVLFLSGVVGVLWGIGRAVFSKTATNGIWFTGIGVVLTVLALLLCAGYNNTAYYPSTADLQSSLTLANSCSSEFTLRTMAYVSILVPFVLAYIIYAWRAIDRKPITAKELEQDGHAY
10249	GC_00001811		PV10SA01	2684	5	5	1	1	0.994872	1	0.997429	COG1556	L-lactate utilization protein LutC, contains LUD domain (LutC) (PDB:2G40)			C	Energy production and conversion	MSSREDILQSIRRATHVKYEKPDLKPLEDMALTYPSMVEQFYFVMKQVGGEAIFLEKEENVNDFIKKAYPGAKRIASNLKSITCATFNPDDLEDPAELNGTDLAVIDGKIGVAENGGVWIEQDVKQRAIYFIAEKLVILLDKNKIVNNMHEAYKLIDTGEYGFGTFISGPSKTADIEQALVMGAHGARDVMVVLI
10250	GC_00001811		PV26FA01	3497	5	5	1	1	0.994872	1	0.997429	COG1556	L-lactate utilization protein LutC, contains LUD domain (LutC) (PDB:2G40)			C	Energy production and conversion	MSSREDILQSIRRATHVKYEKPDLKPLEDMALTYPSMVEQFYFVMKQVGGEAIFLEKEENVNDFIKKAYPGAKRIASNLKSITCATFNPDDLEDPAELNGTDLAVIDGKIGVAENGAVWIEQDVKQRAIYFIAEKLVILLDKNKIVNNMHEAYKLIDTGEYGFGTFISGPSKTADIEQALVMGAHGARDVMVVLI
10251	GC_00001811		PV29FA01	914	5	5	1	1	0.994872	1	0.997429	COG1556	L-lactate utilization protein LutC, contains LUD domain (LutC) (PDB:2G40)			C	Energy production and conversion	MSSREDILQSIRRATHVKYEKPDLKPLEDMALTYPSKVEQFYFVMKQVGGEAIFLEKEENVNDFIKKAYPGAKRIASNLKSITCATFNPDDLEDPAELNGTDLAVIDGKIGVAENGAVWIEQDVKQRAIYFIAEKLVILLDKNKIVNNMHEAYKLIDTGEYGFGTFISGPSKTADIEQALVMGAHGARDVMVVLI
10252	GC_00001811		PV2SA01	1194	5	5	1	1	0.994872	1	0.997429	COG1556	L-lactate utilization protein LutC, contains LUD domain (LutC) (PDB:2G40)			C	Energy production and conversion	MSSREDILQSIRRATHVKYEKPDLKPLEDMALTYPSKVEQFYFVMKQVGGEAIFLEKEENVNDFIKKAYPGAKRIASNLKSITCATFNPDDLEDPAELNGTDLAVIDGKIGVAENGAVWIEQDVKQRAIYFIAEKLVILLDKNKIVNNMHEAYKLIDTGEYGFGTFISGPSKTADIEQALVMGAHGARDVMVVLI
10253	GC_00001811		PV2SA02	1869	5	5	1	1	0.994872	1	0.997429	COG1556	L-lactate utilization protein LutC, contains LUD domain (LutC) (PDB:2G40)			C	Energy production and conversion	MSSREDILQSIRRATHVKYEKPDLKPLEDMALTYPSKVEQFYFVMKQVGGEAIFLEKEENVNDFIKKAYPGAKRIASNLKSITCATFNPDDLEDPAELNGTDLAVIDGKIGVAENGAVWIEQDVKQRAIYFIAEKLVILLDKNKIVNNMHEAYKLIDTGEYGFGTFISGPSKTADIEQALVMGAHGARDVMVVLI
10424	GC_00001846		PV10SA01	992	5	5	1	1	0.998971	1	0.999485	COG4624	Iron only hydrogenase large subunit, C-terminal domain (Nar1) (PDB:1C4A)			C	Energy production and conversion	MKKEKLTVLFCQIGTAITYLSLKWFPLPLPLSVAFTKFIIFTYKDSYINQSATFHSDRTNLNIKREKCDFSFFNISIGHKLSLSLQNLIINPFNYMAFTNNIMIVRHRLLTELVKLWKNGELTTDKIDRLPLELSPRRSKHAGRCCVHKERAVWKYKSLPLLGLDMDDETDELTPLSEYAARAIERANNGKPKDNIMCVIDEACSACVQINYEITDLCRGCTARSCQYNCPKGAVHVHADTGKAWIDHDTCISCGICHKSCPYHAIVYIPVPCEESCPVKAISKDEHGIEHIDENKCIYCGKCMNACPFGAIFEISQTFDVLQRIRKGEQVVAIVAPSILGQFSTTIEQVYGAFRQIGFTDIIEVAQGAMSTVEHEAHELIEKLEEGQKFMTTSCCPSY…
10425	GC_00001846		PV26FA01	1095	5	5	1	1	0.998971	1	0.999485	COG4624	Iron only hydrogenase large subunit, C-terminal domain (Nar1) (PDB:1C4A)			C	Energy production and conversion	MKKEKLTVLFCQIGTAITYLSLKWFPLPLPLSVAFTKFIIFTYKDSYINQSATFHSDRTNLNIKREKCDFSFFNISIGHKLSLSLQNLIINPFNYMAFTNNIMIVRHRLLTELVKLWKNGELTTDKIDRLPLELSPRRSKHAGRCCVHKERAVWKYKSLPLLGLDMDDETDELTPLSEYAARAIERANNGKPKDNIMCVIDEACSACVQINYEITDLCRGCTARSCQYNCPKGAVHVHADTGKAWIDHDTCISCGICHKSCPYHAIVYIPVPCEESCPVKAISKDEHGIEHIDENKCIYCGKCMNACPFGAIFEISQTFDVLQRIRKGEQVVAIVAPSILGQFSTTIEQVYGAFRQIGFTDIIEVAQGAMSTVEHEAHELIEKLEEGQKFMTTSCCPSY…
10426	GC_00001846		PV29FA01	2745	5	5	1	1	0.998971	1	0.999485	COG4624	Iron only hydrogenase large subunit, C-terminal domain (Nar1) (PDB:1C4A)			C	Energy production and conversion	MKKEKLTVLFCQIGTAITYLSLKWFPLPLPLSVAFTKFIIFTYKDSYINQSATFHSDRTNLNIKREKCDFSFFNISIGHKLSLSLQNLIINPFNYMAFTNNIMIVRHRLLTELVKLWKNGELTTDKIDRLPLELSPRRSKHAGRCCVHKERAVWKYKSLPLLGLDMDDETDELTPLSEYAARAIERANNGKPKDNIMCVIDEACSACVQINYEITDLCRGCTARSCQYNCPKGAVHVHADTGKAWIDHDTCISCGICHKSCPYHAIVYIPVPCEESCPVKAISKDEHGIEHIDENKCIYCGKCMNACPFGAIFEISQTFDVLQRIRKGEQVVAIVAPSILGQFSTTIEQVYGAFRQIGFTDIIEVAQGAMSTVEHEAHELIEKLEEGQKFMTTSCCPSY…
10427	GC_00001846		PV2SA01	228	5	5	1	1	0.998971	1	0.999485	COG4624	Iron only hydrogenase large subunit, C-terminal domain (Nar1) (PDB:1C4A)			C	Energy production and conversion	MKKEKLTVLFCQIGTAITYLSLKWFPLPLPLSVAFTKFIIFTYKDSYINQSATFHSDRTNLNIKREKCDFSFFNISIGHKLSLSLQNLIINPFNYMAFTNNIMIVRHRLLTELVKLWKNGELTTDKIDRLPLELSPRRSKHAGRCCVHKERAVWKYKSLPLLGLDMDDETDELTPLSEYAARAIERANNGKPKDNIMCVIDEACSACVQINYEITDLCRGCTARSCQYNCPKGAVHVHADTGKAWIDHDTCISCGICHKSCPYHAIVYIPVPCEESCPVKAISKDEHGIEHIDENKCIYCGKCMNACPFGAIFEISQTFDVLQCIRKGEQVVAIVAPSILGQFSTTIEQVYGAFRQIGFTDIIEVAQGAMSTVEHEAHELIEKLEEGQKFMTTSCCPSY…
10428	GC_00001846		PV2SA02	903	5	5	1	1	0.998971	1	0.999485	COG4624	Iron only hydrogenase large subunit, C-terminal domain (Nar1) (PDB:1C4A)			C	Energy production and conversion	MKKEKLTVLFCQIGTAITYLSLKWFPLPLPLSVAFTKFIIFTYKDSYINQSATFHSDRTNLNIKREKCDFSFFNISIGHKLSLSLQNLIINPFNYMAFTNNIMIVRHRLLTELVKLWKNGELTTDKIDRLPLELSPRRSKHAGRCCVHKERAVWKYKSLPLLGLDMDDETDELTPLSEYAARAIERANNGKPKDNIMCVIDEACSACVQINYEITDLCRGCTARSCQYNCPKGAVHVHADTGKAWIDHDTCISCGICHKSCPYHAIVYIPVPCEESCPVKAISKDEHGIEHIDENKCIYCGKCMNACPFGAIFEISQTFDVLQCIRKGEQVVAIVAPSILGQFSTTIEQVYGAFRQIGFTDIIEVAQGAMSTVEHEAHELIEKLEEGQKFMTTSCCPSY…
11164	GC_00001994		PV10SA01	3539	5	5	1	1	0.999078	1	0.999539	COG0546	Phosphoglycolate phosphatase, HAD superfamily (Gph) (PDB:2NYV)			C	Energy production and conversion	MKKLVIFDLDGTLLNTIADLAAATNQALQYYGYPTHETEAYRFFVGNGINKLFERALPEGERTEENVLKIRSQFIPYYDEHNADLSRPYPGISELLKTLQQQGIMIAVASNKYQAATRKLIAHYFPEINFVEVLGQREGIPAKPDPSIINEIMTKAGVKQEDILYVGDSNVDMQTAHHAGVTAIGVAWGFRPRTELEALHPAHIIEKAEELLPLLLS
11165	GC_00001994		PV26FA01	2627	5	5	1	1	0.999078	1	0.999539	COG0546	Phosphoglycolate phosphatase, HAD superfamily (Gph) (PDB:2NYV)			C	Energy production and conversion	MKKLVIFDLDGTLLNTIADLAAATNQALQYYGYPTHETEAYRFFVGNGINKLFERALPEGERTEENVLKIRSQFIPYYDEHNADLSRPYPGISELLKTLQQQGIMIAVASNKYQAATRKLIAHYFPEINFVEVLGQREGIPAKPDPSIINEIMTKAGVKQEDILYVGDSNVDMQTAHHAGVTAIGVAWGFRPRTELEALHPAHIIEKAEELLPLLLS
11166	GC_00001994		PV29FA01	4340	5	5	1	1	0.999078	1	0.999539	COG0546	Phosphoglycolate phosphatase, HAD superfamily (Gph) (PDB:2NYV)			C	Energy production and conversion	MKKLVIFDLDGTLLNTIADLAAATNQALQYYGYPTHETEAYRFFVGNGINKLFERALPEGERTEENVLKIRSQFIPYYDEHNADLSRPYPGISELLKTLQQQGIMIAVASNKYQAATRKLIAHYFPEINFVEVLGQREGIPAKPDPSIVNEIMTKAGVKQEDILYVGDSNVDMQTAHHAGVTAIGVAWGFRPRTELEALHPAHIIEKAEELLPLLLS
11167	GC_00001994		PV2SA01	2918	5	5	1	1	0.999078	1	0.999539	COG0546	Phosphoglycolate phosphatase, HAD superfamily (Gph) (PDB:2NYV)			C	Energy production and conversion	MKKLVIFDLDGTLLNTIADLAAATNQALQYYGYPTHETEAYRFFVGNGINKLFERALPEGERTEENVLKIRSQFIPYYDEHNADLSRPYPGISELLKTLQQQGIMIAVASNKYQAATRKLIAHYFPEINFVEVLGQREGIPAKPDPSIVNEIMTKAGVKQEDILYVGDSNVDMQTAHHAGVTAIGVAWGFRPRTELEALHPAHIIEKAEELLPLLLS
11168	GC_00001994		PV2SA02	3593	5	5	1	1	0.999078	1	0.999539	COG0546	Phosphoglycolate phosphatase, HAD superfamily (Gph) (PDB:2NYV)			C	Energy production and conversion	MKKLVIFDLDGTLLNTIADLAAATNQALQYYGYPTHETEAYRFFVGNGINKLFERALPEGERTEENVLKIRSQFIPYYDEHNADLSRPYPGISELLKTLQQQGIMIAVASNKYQAATRKLIAHYFPEINFVEVLGQREGIPAKPDPSIVNEIMTKAGVKQEDILYVGDSNVDMQTAHHAGVTAIGVAWGFRPRTELEALHPAHIIEKAEELLPLLLS
11264	GC_00002014		PV10SA01	2702	5	5	1	1	0.994558	0.970946	0.98261	COG1301	Na+/H+-dicarboxylate symporter (GltP) (PDB:1XFH)			C	Energy production and conversion	MKRLKIGLLARIIIAITLGIGFGNVLPGELVRVFVTFNGIFSEFLGFIIPLIILGLVTPAIADIGKEAGKMLVITTLVAYSATLFSGFLSYFTGVTFFPSMITPGAPIEQISEAHDISPFFTVAIPPVMNVMTSLILAFTLGLGIAHLDSTALKNVCNDFKEIIVKTIQTVILPLLPIYIFGIFLNMTHSGQVYNILVVFIKIIGVIFLLHIFLLVFQYTIAALFVHRNPFKLLGKMMPAYFTALGTQSSAATIPVTLRQTVKNGVTEDIAGFVIPLCATIHLSGSTLKIVACALALMIMQGMPFDFPMFAGFIFMLGITMVAAPGVPGGAIMAALGILSSMLGFGESEQALMIALYIAMDSFGTACNVTGDGAIALIIDKFFGKK------------N…
11265	GC_00002014		PV26FA01	3479	5	5	1	1	0.994558	0.970946	0.98261	COG1301	Na+/H+-dicarboxylate symporter (GltP) (PDB:1XFH)			C	Energy production and conversion	MKRLKIGLLARIIIAITLGIGFGNVLPGELVRVFVTFNGIFSEFLGFIIPLIILGLVTPAIADIGKEAGKMLVITTLVAYSATLFSGFLSYFTGVTFFPSMITPGAPIEQISEAHDISPFFTVAIPPVMNVMTSLILAFTLGLGIAHLDSTALKNVCNDFKEIIVKTIQTVILPLLPIYIFGIFLNMTHSGQVYNILMVFIKIIGVIFLLHIFLLVFQYTIAALFVHRNPFKLLGKMMPAYFTALGTQSSAATIPVTLRQTVKNGVTEDIAGFVIPLCATIHLSGSTLKIVACALALMIMQGMPFDFPMFAGFIFMLGITMVAAPGVPGGAIMAALGILSSMLGFGESEQALMIALYIAMDSFGTACNVTGDGAIALIIDKFFGKK------------N…
11266	GC_00002014		PV29FA01	896	5	5	1	1	0.994558	0.970946	0.98261	COG1301	Na+/H+-dicarboxylate symporter (GltP) (PDB:1XFH)			C	Energy production and conversion	MKRLKIGLLARIIIAITLGIGFGNVLPGELVRVFVTFNGIFSEFLGFIIPLIILGLVTPAIADIGKEAGKMLVITTLVAYSATLFSGFLSYFTGVTFFPSMITPGAPIEQISEAHDISPFFTVAIPPVMNVMTSLILAFTLGLGIAHLDSTALKNVCNDFKEIIVKTIQTVILPLLPIYIFGIFLNMTHSGQVYNILVVFIKIIGVIFLLHIFLLVFQYTIAALFVHRNPFKLLGKMMPAYFTALGTQSSAATIPVTLRQTVKNGVTEDIAGFVIPLCATIHLSGSTLKIVACALALMIMQGMPFDFPMFAGFIFMLGITMVAAPGVPGGAIMAALGILSSMLGFGESEQALMIALYIAMDSFGTACNVTGDGAIALIIDKFFGKKYNPQNETFRHSRT…
11267	GC_00002014		PV2SA01	1176	5	5	1	1	0.994558	0.970946	0.98261	COG1301	Na+/H+-dicarboxylate symporter (GltP) (PDB:1XFH)			C	Energy production and conversion	MKRLKIGLLARIIIAITLGIGFGNVLPGELVRVFVTFNGIFSEFLGFIIPLIILGLVTPAIADIGKEAGKMLVITTLVAYSATLFSGFLSYFTGVTFFPSMITPGAPIEQISEAHDISPFFTVAIPPVMNVMTSLILAFTLGLGIAHLDSTALKNVCNDFKEIIVKTIQTVILPLLPIYIFGIFLNMTHSGQVYNILVVFIKIIGVIFLLHIFLLVFQYTIAALFVHRNPFKLLGKMMPAYFTALGTQSSAATIPVTLRQTVKNGVTEDIAGFVIPLCATIHLSGSTLKIVACALALMIMQGMPFDFPMFAGFIFMLGITMVAAPGVPGGAIMAALGILSSMLGFGESEQALMIALYIAMDSFGTACNVTGDGAIALIIDKFFGKK------------N…
11268	GC_00002014		PV2SA02	1851	5	5	1	1	0.994558	0.970946	0.98261	COG1301	Na+/H+-dicarboxylate symporter (GltP) (PDB:1XFH)			C	Energy production and conversion	MKRLKIGLLARIIIAITLGIGFGNVLPGELVRVFVTFNGIFSEFLGFIIPLIILGLVTPAIADIGKEAGKMLVITTLVAYSATLFSGFLSYFTGVTFFPSMITPGAPIEQISEAHDISPFFTVAIPPVMNVMTSLILAFTLGLGIAHLDSTALKNVCNDFKEIIVKTIQTVILPLLPIYIFGIFLNMTHSGQVYNILVVFIKIIGVIFLLHIFLLVFQYTIAALFVHRNPFKLLGKMMPAYFTALGTQSSAATIPVTLRQTVKNGVTEDIAGFVIPLCATIHLSGSTLKIVACALALMIMQGMPFDFPMFAGFIFMLGITMVAAPGVPGGAIMAALGILSSMLGFGESEQALMIALYIAMDSFGTACNVTGDGAIALIIDKFFGKK------------N…
11729	GC_00002107		PV10SA01	1922	5	5	1	1	0.999034	0.707895	0.828636	COG0655	Multimeric flavodoxin WrbA, includes NAD(P)H:quinone oxidoreductase (WrbA) (PDB:4DY4)			C	Energy production and conversion	MEDFKKALEGTLGRKHIDNIVDQVASFPDRFDALYTLTQHEETRIAWRATWACEKLSFLLPSLLMDKREELITGHAMPPRWNKTPATEYPSSSSCPEACQRSFLRFLPSRYAIFCRKRIRTSRLHETCLRHLPGRTGTDRRAESISGKYGTGILYGCSAMCPQQHPKKNKVMKILILNGSPRCQGLISRMLDIMAEEARIRGAEVEAISIHKLQVRPCTGCMACRSRQACVLPEDDAQRTLQKIQWADVLIVGSPCYWGNMNGHLKVVFDRIVYGMMGESPKGLPQALHKGKKAVIVSTCSTPWPFNIWFNQTRGVVKALREILKWSGFSIKGVIQKGGTKQHPELTESDKKKCRKIIRNL
11730	GC_00002107		PV26FA01	4133	5	5	1	1	0.999034	0.707895	0.828636	COG0655	Multimeric flavodoxin WrbA, includes NAD(P)H:quinone oxidoreductase (WrbA) (PDB:4DY4)			C	Energy production and conversion	MEDFKKALEGTLGRKHIDNIVDQVASFPDRFDALYTLTQHEETRIAWRATWACEKLSFLLPSLLMDKREELITGHAMPPRWNKTPATEYPSSSSCPEACQRSFLRFLPSRYAIFCRKRIRTSRLHETCLRHLPGRTGTDRRAESISGKYGTGILYGCSAMCPQQHPKKNKVMKILILNGSPRCQGLISRMLDIMAEEARIRGAEVEAISIHKLQVRPCTGCMACRSRQACVLPEDDAQRTLQKIQWADVLIVGSPCYWGNMNGHLKVVFDRIVYGMMGESPKGLPQALHKGKKAVIVSTCSTPWPFNIWFNQTRGVVKALREILKWSGFSIKGVIQKGGTKQHPELTESDKKKCRKIIRNL
11731	GC_00002107		PV29FA01	1444	5	5	1	1	0.999034	0.707895	0.828636	COG0655	Multimeric flavodoxin WrbA, includes NAD(P)H:quinone oxidoreductase (WrbA) (PDB:4DY4)			C	Energy production and conversion	#NAME?
11732	GC_00002107		PV2SA01	1490	5	5	1	1	0.999034	0.707895	0.828636	COG0655	Multimeric flavodoxin WrbA, includes NAD(P)H:quinone oxidoreductase (WrbA) (PDB:4DY4)			C	Energy production and conversion	#NAME?
11733	GC_00002107		PV2SA02	2165	5	5	1	1	0.999034	0.707895	0.828636	COG0655	Multimeric flavodoxin WrbA, includes NAD(P)H:quinone oxidoreductase (WrbA) (PDB:4DY4)			C	Energy production and conversion	#NAME?
12004	GC_00002162		PV10SA01	3546	5	5	1	1	0.997712	1	0.998855	COG1902	2,4-dienoyl-CoA reductase or related NADH-dependent reductase, Old Yellow Enzyme (OYE) family (FadH) (PDB:1BWK)			C	Energy production and conversion	MMNSKLFTSASIGPLTLRNRTIRSAAFESMCPGNAPSRQLKDYHCSVAAGGVGMTTIAYAAVTQSGLSFDRQLWMRPEIIPGLREITDAVHKEGAAVSIQLGHCGNMSHKSICGVTPVGASSGFNLYSPTFVRGLRKEELPQMAKAYGQSVNWAREAGFDAVEIHAGHGYLISQFLSPYTNHRKDEFGGSLENRMRFMDMVMEEVMRAAGNDMAVLVKTNMRDGFKGGMEIDEAVQVAKRLVQDGAHALVLSGGFVSKAPMYVMRGAMPIKSMTHYMNCWWLKYGVRMVGKWMIPTVPFKEAYFLEDALRFRTEIKEIPLVYVGGLVSREKIDEVLDDGFEFVQMGRALLNEPGFVNRLRTEEKARCNCGHSNYCIARMYTIDMACHKHLEEKLPLCLE…
12005	GC_00002162		PV26FA01	2620	5	5	1	1	0.997712	1	0.998855	COG1902	2,4-dienoyl-CoA reductase or related NADH-dependent reductase, Old Yellow Enzyme (OYE) family (FadH) (PDB:1BWK)			C	Energy production and conversion	MMNSKLFTSASIGPLTLRNRTIRSAAFESMCPGNAPSRQLKDYHCSVAAGGVGMTTIAYAAVTQSGLSFDRQLWMRPEIIPGLREITDAVHKEGAAVSIQLGHCGNMSHKSICGVTPVGASSGFNLYSPTFVRGLRKEELPQMAKAYGQSVNWAREAGFDAVEIHAGHGYLISQFLSPYTNHRKDEFGGSLENRMRFMDMVMEEVMRAAGNDMAVLVKTNMRDGFKGGMEIDEAVQVAKRLVQDGAHALVLSGGFVSKAPMYVMRGAMPIKSMTHYMNCWWLKYGVRMVGKWMIPTVPFKEAYFLEDALRFRTEIKEIPLVYVGGLVSREKIDEVLDDGFEFVQMGRVLLNEPGFVNRLRTEEKARCNCGHSNYCIARMYTIDMACHKHLEEKLPLCLE…
12006	GC_00002162		PV29FA01	4334	5	5	1	1	0.997712	1	0.998855	COG1902	2,4-dienoyl-CoA reductase or related NADH-dependent reductase, Old Yellow Enzyme (OYE) family (FadH) (PDB:1BWK)			C	Energy production and conversion	MMNSKLFTPASIGPLTLRNRTIRSAAFESMCPGNAPSRQLKDYHCSVAAGGVGMTTIAYAAVTQSGLSFDRQLWMRPEIIPGLREITDAVHKEGAAVSIQLGHCGNMSHKSICGVTPIGASSGFNLYSPTFVRGLRKEELPQMAKAYGQSVNWAREAGFDAVEIHAGHGYLISQFLSPYTNHRKDEFGGSLENRMRFMDMVMEEVMRAAGNDMAVLVKTNMRDGFKGGMEIDEAVQVAKRLVQDGAHALVLSGGFVSKAPMYVMRGAMPIKSMTHYMNCWWLKYGVRMVGKWMIPTVPFKEAYFLEDALRFRTEIKEIPLVYVGGLVSREKIDEVLDDGFEFVQMGRALLNEPGFVNRLRTEEKARCNCGHSNYCIARMYTIDMACHKHLEEKLPLCLE…
12007	GC_00002162		PV2SA01	2924	5	5	1	1	0.997712	1	0.998855	COG1902	2,4-dienoyl-CoA reductase or related NADH-dependent reductase, Old Yellow Enzyme (OYE) family (FadH) (PDB:1BWK)			C	Energy production and conversion	MMNSKLFTPASIGPLTLRNRTIRSAAFESMCPGNAPSRQLKDYHCSVAAGGVGMTTIAYAAVTQSGLSFDRQLWMRPEIIPGLREITDAVHKEGAAVSIQLGHCGNMSHKSICGVTPIGASSGFNLYSPTFVRGLRKEELPQMAKAYGQSVNWAREAGFDAVEIHAGHGYLISQFLSPYTNHRKDEFGGSLENRMRFMDMVMEEVMRAAGNDMAVLVKTNMRDGFKGGMEIDEAVQVAKRLVQDGAHALVLSGGFVSKAPMYVMRGAMPIKSMTHYMNCWWLKYGVRMVGKWMIPTVPFKEAYFLEDALRFRTEIKEIPLVYVGGLVSREKIDEVLDDGFEFVQMGRALLNEPGFVNRLRTEEKARCNCGHSNYCIARMYTIDMACHKHLEEKLPLCLE…
12008	GC_00002162		PV2SA02	3599	5	5	1	1	0.997712	1	0.998855	COG1902	2,4-dienoyl-CoA reductase or related NADH-dependent reductase, Old Yellow Enzyme (OYE) family (FadH) (PDB:1BWK)			C	Energy production and conversion	MMNSKLFTPASIGPLTLRNRTIRSAAFESMCPGNAPSRQLKDYHCSVAAGGVGMTTIAYAAVTQSGLSFDRQLWMRPEIIPGLREITDAVHKEGAAVSIQLGHCGNMSHKSICGVTPIGASSGFNLYSPTFVRGLRKEELPQMAKAYGQSVNWAREAGFDAVEIHAGHGYLISQFLSPYTNHRKDEFGGSLENRMRFMDMVMEEVMRAAGNDMAVLVKTNMRDGFKGGMEIDEAVQVAKRLVQDGAHALVLSGGFVSKAPMYVMRGAMPIKSMTHYMNCWWLKYGVRMVGKWMIPTVPFKEAYFLEDALRFRTEIKEIPLVYVGGLVSREKIDEVLDDGFEFVQMGRALLNEPGFVNRLRTEEKARCNCGHSNYCIARMYTIDMACHKHLEEKLPLCLE…
12109	GC_00002183		PV10SA01	3536	5	5	1	1	0.99759	1	0.998794	COG3630	Na+-transporting oxaloacetate/methylmalonyl-CoA decarboxylase, gamma subunit (OadG)			C	Energy production and conversion	MENIGVGLMLMVVGMATVFVILLIVIYLSKYLITVVNKVAPEETPKKAPAVAPTADTGAMDAIKAAVEILTAGKGQVIKIEKL
12110	GC_00002183		PV26FA01	2630	5	5	1	1	0.99759	1	0.998794	COG3630	Na+-transporting oxaloacetate/methylmalonyl-CoA decarboxylase, gamma subunit (OadG)			C	Energy production and conversion	MENIGVGLMLMVVGMATVFVILLIVIYLSKYLITVVNKVAPEETPKKAPAVAPTADTGAMDAIKAAVEILTAGKGQVIKIEKL
12111	GC_00002183		PV29FA01	4343	5	5	1	1	0.99759	1	0.998794	COG3630	Na+-transporting oxaloacetate/methylmalonyl-CoA decarboxylase, gamma subunit (OadG)			C	Energy production and conversion	MENIGVGLMLMVVGMATVFVILLIVIYLSKYLITVVNKVAPEETPKKAPAVAPTADTGAMDAIKAAVEILTAGKGQVIKIEKL
12112	GC_00002183		PV2SA01	2915	5	5	1	1	0.99759	1	0.998794	COG3630	Na+-transporting oxaloacetate/methylmalonyl-CoA decarboxylase, gamma subunit (OadG)			C	Energy production and conversion	MENIGVGLMLMVVGMATVFVILLIVIYLSKYLITVVNKVAPEETPKKAPAVAPTADTGAMDAIKAVVEILTAGKGQVIKIEKL
12113	GC_00002183		PV2SA02	3590	5	5	1	1	0.99759	1	0.998794	COG3630	Na+-transporting oxaloacetate/methylmalonyl-CoA decarboxylase, gamma subunit (OadG)			C	Energy production and conversion	MENIGVGLMLMVVGMATVFVILLIVIYLSKYLITVVNKVAPEETPKKAPAVAPTADTGAMDAIKAVVEILTAGKGQVIKIEKL
12454	GC_00002252		PV10SA01	2783	5	5	1	1	0.997729	1	0.998863	COG1620	L-lactate permease (LldP)			C	Energy production and conversion	MNLVLAIIPVLLLIILMAFFKMSGDKSSVISLVVTMLIAFFGFHFPVNDLLSSFLYGALKAVSPILIIILMAIFSYNVLLKTEKMEIIKQQFSSISTDKSIQVLLLTWGFGGLLEAMAGFGTAVAIPAAILVSLGFKPVFSATVSLIANSVATAFGAIGTPVLVLAKETNLDVLVLSANVVLQLSVLMFLIPFVLLFLTDPKLRSLPKNIFLSLLVGGVSLGSQYVAARYMGAESPAIIGSILSIIVIVAYGKLTASKEEKARKSTLKGLEVLNAWSIYLLILFLIVLTSPLFPGLRTTLENNWVTRISLPINDSTMNYTVSWLTHAGVLLFVGTFVGGLIQGAKIWELFAVLWNTVKQLKKTFITVICLVSLSTIMDTAGMISVIATALAVATGSLYP…
12455	GC_00002252		PV26FA01	3394	5	5	1	1	0.997729	1	0.998863	COG1620	L-lactate permease (LldP)			C	Energy production and conversion	MNLVLAIIPVLLLIILMAFFKMSGDKSSVISLVVTMLIAFFGFHFPVNDLLSSFLYGALKAVSPILIIILMAIFSYNVLLKTEKMEIIKQQFSSISTDKSIQVLLLTWGFGGLLEAMAGFGTAVAIPAAILVSLGFKPVFSATVSLIANSVATAFGAIGTPVLVLAKETNLDVLVLSANVVLQLSVLMFLIPFVLLFLTDSKLKSLPKNIFLSLLVGGVSLGSQYVAARYMGAESPAIIGSILSIIVIVAYGKLTASKEEKARKSTLKGLEVLNAWSIYLLILFLIVLTSPLFPGLRTTLENNWVTRISLPINDSTMNYTVSWLTHAGVLLFVGTFVGGLIQGAKIWELFAVLWNTVKQLKKTFITVICLVSLSTIMDTAGMISVIATALAVATGSLYP…
12456	GC_00002252		PV29FA01	578	5	5	1	1	0.997729	1	0.998863	COG1620	L-lactate permease (LldP)			C	Energy production and conversion	MNLVLAIIPVLLLIILMAFFKMSGDKSSVISLVVTMLIAFFGFHFPVNDLLSSFLYGALKAVSPILIIILMAIFSYNVLLKTEKMEIIKQQFSSISTDKSIQVLLLTWGFGGLLEAMAGFGTAVAIPAAILVSLGFKPVFSATVSLIANSVATAFGAIGTPVLVLAKETNLDVLVLSANVVLQLSVLMFLIPFVLLFLTDPKLRSLPKNIFLSLLVGGVSLGSQYVAARYMGAESPAIIGSILSIIVIVAYGKLTASKEEKARKSTLKGLEVLNAWSIYLLILFLIVLTSPLFPGLRTTLENNWVTRISLPINDSTMNYTVSWLTHAGVLLFVGTFVGGLIQGAKIWELFAVLWNTVKQLKKTFITVICLVSLSTIMDTAGMISVIATALAVATGSLYP…
12457	GC_00002252		PV2SA01	1094	5	5	1	1	0.997729	1	0.998863	COG1620	L-lactate permease (LldP)			C	Energy production and conversion	MNLVLAIIPVLLLIILMAFFKMSGDKSSVISLVVTMLIAFFGFHFPVNDLLSSFLYGALKAVSPILIIILMAIFSYNVLLKTEKMEIIKQQFSSISTDKSIQVLLLTWGFGGLLEAMAGFGTAVAIPAAILVSLGFKPVFSATVSLIANSVATAFGAIGTPVLVLAKETNLDVLVLSANVVLQLSVLMFLIPFVLLFLTDPKLRSLPKNIFLSLLVGGVSLGSQYVAARYMGAESPAIIGSILSIIVIVAYGKLTASKEEKERKSTLKGLEVLNAWSIYLLILFLIVLTSPLFPGLRTTLENNWVTRISLPINDSTMNYTVSWLTHAGVLLFVGTFVGGLIQGAKIWELFAVLWNTVKQLKKTFITVICLVSLSTIMDTAGMISVIATALAVATGSLYP…
12458	GC_00002252		PV2SA02	1769	5	5	1	1	0.997729	1	0.998863	COG1620	L-lactate permease (LldP)			C	Energy production and conversion	MNLVLAIIPVLLLIILMAFFKMSGDKSSVISLVVTMLIAFFGFHFPVNDLLSSFLYGALKAVSPILIIILMAIFSYNVLLKTEKMEIIKQQFSSISTDKSIQVLLLTWGFGGLLEAMAGFGTAVAIPAAILVSLGFKPVFSATVSLIANSVATAFGAIGTPVLVLAKETNLDVLVLSANVVLQLSVLMFLIPFVLLFLTDPKLRSLPKNIFLSLLVGGVSLGSQYVAARYMGAESPAIIGSILSIIVIVAYGKLTASKEEKERKSTLKGLEVLNAWSIYLLILFLIVLTSPLFPGLRTTLENNWVTRISLPINDSTMNYTVSWLTHAGVLLFVGTFVGGLIQGAKIWELFAVLWNTVKQLKKTFITVICLVSLSTIMDTAGMISVIATALAVATGSLYP…
12864	GC_00002334		PV10SA01	1836	5	5	1	1	0.995452	1	0.997721	COG0546	Phosphoglycolate phosphatase, HAD superfamily (Gph) (PDB:2NYV)			C	Energy production and conversion	MKYTTYLFDFDYTLADSSRGIVICFRNVLERHGHTGISDEAIKRTIGKTLEDSFSILSGITTPETLAEYKKEYVKEADTYMTVNTFFFPETVTVLKTLKSQGAQIGIISTKFRFRIREMVDQHFPKDFFDIIIGGEDVKQAKPDPQGIKKALRRLHRRKSETLYIGDSTVDAETAQAAKVDFVGVLNGMTTREELMVYPHRQILDNLSLLPLIHKFTPYEPDKHFPEKFFYSSCFPPKIVAFYKLLHQKQIRGKHEIKENPTCCVCKNCGNTFQGNYCPHCGQNRHTPRFTIRNAFQNILSGFFNIDHGFSRNLIELLYRPGYMIRDYLKGKRVHYYKPFQTLFVLAALYIMGVQLIDPAAIKLSEKEMEEEPTIASLMDDIKYQQEQTSDSCTKYYLG…
12865	GC_00002334		PV26FA01	4219	5	5	1	1	0.995452	1	0.997721	COG0546	Phosphoglycolate phosphatase, HAD superfamily (Gph) (PDB:2NYV)			C	Energy production and conversion	MKYTTYLFDFDYTLADSSRGIVICFRNVLERHGHTGISDEAIKRTIGKTLEDSFSILSGITTPETLAEYKKEYVKEADTYMTVNTFFFPETVTVLKTLKSQGAQIGIISTKFRFRIREMVDQHFPKDFFDIIIGGEDVKQAKPDPQGIKKALRRLHRRKSETLYIGDSTVDAETAQAAKVDFVGVLNGMTTREELMVYPHRQILDNLSLLPLIHKFTPYEPDKHFPEKFFYSSCFPPKIVAFYKLLHQKQIRGKHEIKENPTCCVCKNCGNTFQGNYCPHCGQNRHTPRFTIRNAFQNILSGFFNIDHGFSRNLIELLYRPGYMIRDYLKGKRVHYYKPFQTLFVLAALYIMGVQLIDPAAIKLSEKEMEEEPTIASLMDDIKYQQEQTSDSCTKYYLG…
12866	GC_00002334		PV29FA01	1529	5	5	1	1	0.995452	1	0.997721	COG0546	Phosphoglycolate phosphatase, HAD superfamily (Gph) (PDB:2NYV)			C	Energy production and conversion	MKYTTYLFDFDYTLADSSRGIVICFRNVLERHGHTGISDEAIKRTIGKTLEDSFSILSGITTPETLAEYKKEYVKEADTYMTVNTFFFPETVTVLKILKSQGAQIGIISTKFRFRIREMVDQHFPKDFFDIIIGGEDVKQAKPDPQGIKKALRRLHRRKSETLYIGDSTVDAETAQAAKVDFVGVLNGMTTREELMVYPHRQILDNLSLLPLIHKFTPYEPDKHFPEKFFYSSCFPQKIVAFYKLLHQKQIRGKHEIKENPTCCVCKNCGNTFQGNYCPHCGQNRHTPRFTIRNAFQNILSGFFNIDHGFSRNLIELLYRPGYMIRDYLKGKRVHYYKPFQTLFVLAALYIMGVQLIDPAAIKLSEKEMEEEPTIASLMDDIKYQQEQTSDSCTKYYLG…
12867	GC_00002334		PV2SA01	1893	5	5	1	1	0.995452	1	0.997721	COG0546	Phosphoglycolate phosphatase, HAD superfamily (Gph) (PDB:2NYV)			C	Energy production and conversion	MKYTTYLFDFDYTLADSSRGIVICFRNVLERHGHTGISDEAIKRTIGKTLEDSFSILSGITTPETLAEYKKEYVKEADTYMTVNTFFFPETVTVLKTLKSQGAQIGIISTKFRFRIREMVDQHFPKDFFDIIIGGEDVKQAKPDPQGIKKALRRLHRRKSETLYIGDSTVDAETAQAAKVDFVGVLNGMTTREELMVYPHRQILDNLSLLPLIHKFTPYEPDKHFPEKFFYSSYFPKKIVAFYKLLHQKQIRGKHEIKENTTCCVCKNCGNTFQGNYCPHCGQNRHTPRFTIRNAFQNILSGFFNIDHGFSRNLIELLYRPGYMIRDYLKGKRVHYYKPFQTLFVLAALYIMGVQLIDPAAIKLSEKEMEEEPTIASLMDDIKYQQEQTSDSCTKYYLG…
12868	GC_00002334		PV2SA02	2568	5	5	1	1	0.995452	1	0.997721	COG0546	Phosphoglycolate phosphatase, HAD superfamily (Gph) (PDB:2NYV)			C	Energy production and conversion	MKYTTYLFDFDYTLADSSRGIVICFRNVLERHGHTGISDEAIKRTIGKTLEDSFSILSGITTPETLAEYKKEYVKEADTYMTVNTFFFPETVTVLKTLKSQGAQIGIISTKFRFRIREMVDQHFPKDFFDIIIGGEDVKQAKPDPQGIKKALRRLHRRKSETLYIGDSTVDAETAQAAKVDFVGVLNGMTTREELMVYPHRQILDNLSLLPLIHKFTPYEPDKHFPEKFFYSSYFPKKIVAFYKLLHQKQIRGKHEIKENTTCCVCKNCGNTFQGNYCPHCGQNRHTPRFTIRNAFQNILSGFFNIDHGFSRNLIELLYRPGYMIRDYLKGKRVHYYKPFQTLFVLAALYIMGVQLIDPAAIKLSEKEMEEEPTIASLMDDIKYQQEQTSDSCTKYYLG…
13584	GC_00002478		PV10SA01	3390	5	5	1	1	0.995549	0.990933	0.993236	COG1301	Na+/H+-dicarboxylate symporter (GltP) (PDB:1XFH)			C	Energy production and conversion	MKKFLSNTIVQLLIAVIIGLLAGFVVNDAVLEVVICIKHITGQIIFFLVPLIILGFISPSIAHLRSNASKMLLFAFGIAYLSSIGASFFGAAVGYNVIPFLHIADDANTLKALPENLLKIDIPPVMNVMTALVLAALIGLATAWVKSDEISKLLDTFQKMVLELVKRVLLPVLPVFIAANFCILSYQGAVTKQLPVFLSVLIVVIVCHFIWLSLLYFIAAVYSRKNSWQVLKYYGPAYLTALGTMSSAATLGVALECARKSPILRKEISDVTIPLFANIHLCGSILTETVFVLTVSQMLYGSMPSILQITLFILLLGLFAIGAPGVPGGTVLASLGLIISVLHFNEAGTALLLTIFALQDSFGTACNITGDGALTLITDTFEKKIASKPKAFK
13585	GC_00002478		PV26FA01	2773	5	5	1	1	0.995549	0.990933	0.993236	COG1301	Na+/H+-dicarboxylate symporter (GltP) (PDB:1XFH)			C	Energy production and conversion	MKKFLSNTIVQLLIAVIIGLLAGFVVNDAVLEVVICIKHITGQIIFFLVPLIILGFIAPSIAHLRSNASKMLLFAFSIAYLSSIGASFFGAAVGYNVIPFLHIADDANTLKALPENLLKIDIPPVMNVMTALVLAALIGLATAWVKSDEISKLLDTFQKMVLELVKRVLLPVLPVFIAANFCILSYQGAVTKQLPVFLSVLIVVIVCHFIWLSLLYFIAAVYSRKNSWQVLKYYGPAYLTALGTMSSAATLGVALECARKSPILRKEISDVTIPLFANIHLCGSILTETVFVLTVSQMLYGSMPSILQITLFILLLGLFAIGAPGVPGGTVLASLGLIISVLHFNEAGTALLLTIFALQDSFGTACNITGDGALTLITDTFEKR---------
13586	GC_00002478		PV29FA01	4524	5	5	1	1	0.995549	0.990933	0.993236	COG1301	Na+/H+-dicarboxylate symporter (GltP) (PDB:1XFH)			C	Energy production and conversion	MKKFLSNTIVQLLIAVIIGLLAGFVVNDAVLEVVICIKHITGQIIFFLVPLIILGFIAPSIAHLRSNASKMLLFAFGIAYLSSIGASFFGAAVGYNVIPFLHIADDANTLKALPENLLKIDIPPVMNVMTALVLAALIGLATAWVKSDEISKLLDTFQKMVLELVKRVLLPVLPVFIAANFCILSYQGAVTKQLPVFLSVLIVVIVCHFIWLSLLYFIAAVYSRKNSWQVLKYYGPAYLTALGTMSSAATLGVALECARKSPILRKEISDVTIPLFANIHLCGSILTETVFVLTVSQMLYGSMPSILQITLFILLLGLFAIGAPGVPGGTVLASLGLIISVLHFNEAGTALLLTIFALQDSFGTACNITGDGALTLITDTFEKKIASKPKAFK
13587	GC_00002478		PV2SA01	2627	5	5	1	1	0.995549	0.990933	0.993236	COG1301	Na+/H+-dicarboxylate symporter (GltP) (PDB:1XFH)			C	Energy production and conversion	MKKFLSNTIVQLLIAVIIGLLAGFVVNDAVLEVVICIKHITGQIIFFLVPLIILGFISPSIAHLRSNASKMLLFAFGIAYLSSIGASFFGAAVGYNVIPFLHIADDANTLKALPENLLKIDIPPVMNVMTALVLAALIGLATAWVKSDEISKLLDTFQKMVLELVKRVLLPVFPVFIAANFCILSYQGAVTKQLPVFLSVLIVVIVCHFIWLSLLYFIAAVYSRKNSWQVLKYYGPAYLTALGTMSSAATLGVALECARKSPILRKEISDVTIPLFANIHLCGSILTETVFVLTVSQMLYGSMPSILQITLFILLLGLFAIGAPGVPGGTVLASLGLIISVLHFNEAGTALLLTIFALQDSFGTACNITGDGALTLITDTFEKKIASKPKAFK
13588	GC_00002478		PV2SA02	3303	5	5	1	1	0.995549	0.990933	0.993236	COG1301	Na+/H+-dicarboxylate symporter (GltP) (PDB:1XFH)			C	Energy production and conversion	MKKFLSNTIVQLLIAVIIGLLAGFVVNDAVLEVVICIKHITGQIIFFLVPLIILGFISPSIAHLRSNASKMLLFAFGIAYLSSIGASFFGAAVGYNVIPFLHIADDANTLKALPENLLKIDIPPVMNVMTALVLAALIGLATAWVKSDEISKLLDTFQKMVLELVKRVLLPVFPVFIAANFCILSYQGAVTKQLPVFLSVLIVVIVCHFIWLSLLYFIAAVYSRKNSWQVLKYYGPAYLTALGTMSSAATLGVALECARKSPILRKEISDVTIPLFANIHLCGSILTETVFVLTVSQMLYGSMPSILQITLFILLLGLFAIGAPGVPGGTVLASLGLIISVLHFNEAGTALLLTIFALQDSFGTACNITGDGALTLITDTFEKKIASKPKAFK
13679	GC_00002497		PV10SA01	2697	5	5	1	1	0.998533	1	0.999266	COG1271	Cytochrome bd-type quinol oxidase, subunit 1 (AppC) (PDB:5DOQ)			C	Energy production and conversion	MFENIDTSLIDWSRAQFALTAMYHWLFVPLTLGLAVIMGLMETFYVTTGKEFWKNTAKFWMKLFGINFAVGVATGLILEFEFGTNWSNYSWFVGDIFGAPLAIEGILAFFMEATFIAVMFFGWNKVSKRFHLASTWLTGLGATISAWWILVANAWMQYPVGMAFNPETVRNEMVDFAAVALSPMAIAKFFHTVLSSWILGAVFVVGISCWYLLRNRQKEFALSSIKVAAAVGLFASLVTAWTGDISGVQVAKVQPMKMAAAEGLHDGGNGVPFTIAGDLKIPKMLSILATHDIDGYVPGINNLLEGGYQMPDGTTALSAEEKIKRGQIAIAALDAFRKAHKAGDEASAAAARKTLDENVKYFGYGYIKDPAHLVPNVGLTFWSFRIMVGLGGYFILFFI…
13680	GC_00002497		PV26FA01	3484	5	5	1	1	0.998533	1	0.999266	COG1271	Cytochrome bd-type quinol oxidase, subunit 1 (AppC) (PDB:5DOQ)			C	Energy production and conversion	MFENIDTSLIDWSRAQFALTAMYHWLFVPLTLGLAVIMGLMETFYVTTGKEFWKNTAKFWMKLFGINFAVGVATGLILEFEFGTNWSNYSWFVGDIFGAPLAIEGILAFFMEATFIAVMFFGWNKVSKRFHLASTWLTGLGATISAWWILVANAWMQYPVGMAFNPETVRNEMVDFAAVALSPMAIAKFFHTVLSSWILGAVFVVGISCWYLLRNRQKEFALSSIKVAAAVGLFASLVTAWTGDISGVQVAKVQPMKMAAAEGLHDGGNGVPFTIAGDLKIPKMLSILATHDIDGYVPGINNLLEGGYQMPDGTTALSAEEKIKRGQIAIAALDAFRKAHKAGDEASAAAARKTLDENVKYFGYGYIKDPAHLVPNVGLTFWSFRIMVGLGGYFILFFI…
13681	GC_00002497		PV29FA01	901	5	5	1	1	0.998533	1	0.999266	COG1271	Cytochrome bd-type quinol oxidase, subunit 1 (AppC) (PDB:5DOQ)			C	Energy production and conversion	MFENIDTSLIDWSRAQFALTAMYHWLFVPLTLGLAVIMGLMETFYVTTGKEFWKNTAKFWMKLFGINFAVGVATGLILEFEFGTNWSNYSWFVGDIFGAPLAIEGILAFFMEATFIAVMFFGWNKVSKRFHLASTWLTGLGATISAWWILVANAWMQYPVGMAFNPETVRNEMVDFAAVALSPMAIAKFFHTVLSSWILGAVFVVGISCWYLLRNRQKEFALSSIKVAAAVGLFASLVTAWTGDISGVQVAKVQPMKMAAAEGLHDGGNGVPFTIAGDLKIPKMLSILATHDIDGYVPGINNLLEGGYQMPDGTTALSAEEKIKRGQIAIAALDAFRKAHKAGDEASAAAARKTLDENVKYFGYGYIKDPAHLVPNVGLTFWSFRIMVGLGGYFILFFI…
13682	GC_00002497		PV2SA01	1181	5	5	1	1	0.998533	1	0.999266	COG1271	Cytochrome bd-type quinol oxidase, subunit 1 (AppC) (PDB:5DOQ)			C	Energy production and conversion	MFENIDTSLIDWSRAQFALTAMYHWLFVPLTLGLAVIMGLMETFYVTTGKEFWKNTAKFWMKLFGINFAVGVATGLILEFEFGTNWSNYSWFVGDIFGAPLAIEGILAFFMEATFIAVMFFGWNKVSKRFHLASTWLTGLGATISAWWILVANAWMQYPVGMAFNPETVRNEMVDFAAVALSPMAIAKFFHTVLSSWILGAVFVVGISCWYLLRNRQKEFALSSIKVAAAVGLFASLVTAWTGDISGVQVAKVQPMKMAAAEGLHDGGNGVPFTIAGDLKIPKMLSILATHDIDGYVPGINNLLEGGYQMPDGTMALSAEEKIKRGQIAIAALDAFRKAHKAGDEASAAAARKTLDENVKYFGYGYIKDPAHLVPNVGLTFWSFRIMVGLGGYFILFFI…
13683	GC_00002497		PV2SA02	1856	5	5	1	1	0.998533	1	0.999266	COG1271	Cytochrome bd-type quinol oxidase, subunit 1 (AppC) (PDB:5DOQ)			C	Energy production and conversion	MFENIDTSLIDWSRAQFALTAMYHWLFVPLTLGLAVIMGLMETFYVTTGKEFWKNTAKFWMKLFGINFAVGVATGLILEFEFGTNWSNYSWFVGDIFGAPLAIEGILAFFMEATFIAVMFFGWNKVSKRFHLASTWLTGLGATISAWWILVANAWMQYPVGMAFNPETVRNEMVDFAAVALSPMAIAKFFHTVLSSWILGAVFVVGISCWYLLRNRQKEFALSSIKVAAAVGLFASLVTAWTGDISGVQVAKVQPMKMAAAEGLHDGGNGVPFTIAGDLKIPKMLSILATHDIDGYVPGINNLLEGGYQMPDGTMALSAEEKIKRGQIAIAALDAFRKAHKAGDEASAAAARKTLDENVKYFGYGYIKDPAHLVPNVGLTFWSFRIMVGLGGYFILFFI…
14069	GC_00002575		PV10SA01	1142	5	5	1	1	0.997414	1	0.998705	COG1979	Alcohol dehydrogenase YqhD, Fe-dependent ADH family (YqdH) (PDB:1OJ7)			C	Energy production and conversion	MDNFIFHNPTRLIFGKGMIAQLSQQIPADKRIMITFGGGSVKTNGVYEQVIQALEGRDYTEFWGIESNPDISTLKKAIESGKEKNIDFLLAVGGGSVIDGTKLISAGIPYDGDAWELVKKGSAQNTIPLGTVLTIPATGSEMNNGAVISCRETHEKYPFFSSHPVFSILDPTVTFSLPDYQIACGLADTFVHVMEQYMTKTNESYLMDRWSESILRTLVQIAPQIKENKQDYHLMSEFMMSATMALNGFIAMGVSEDWATHMIGHELTALHGMTHGQTLAIVFPGTLRTLADKKRDKILQYGERIWGVTSGVPSVRVSLTIEKTEEFFRNLGLKTRLDEAGIGDDTIEEIVRRFNERGAAYGEDGDVTGEVARRILQNCKSKKETTDTEGTSMKTVILT…
14070	GC_00002575		PV26FA01	922	5	5	1	1	0.997414	1	0.998705	COG1979	Alcohol dehydrogenase YqhD, Fe-dependent ADH family (YqdH) (PDB:1OJ7)			C	Energy production and conversion	MDNFIFHNPTRLIFGKGMIAQLSQQIPADKRIMITFGGGSVKTNGVYEQVIQALEGRDYTEFWGIESNPDISTLKKAIESGKEKNIDFLLAVGGGSVIDGTKLISAGIPYDGDAWELVKKGSAQNTIPLGTVLTIPATGSEMNNGAVISCRETHEKYPFFSSHPVFSILDPTVTFSLPDYQIACGLADTFVHVMEQYMTKTNESYLMDRWSESILRTLVQIAPQIKENKQDYHLMSEFMMSATMALNGFIAMGVSEDWATHMIGHELTALHGMTHGQTLAIVFPGTLRTLADKKRDKILQYGERIWGVTSGVPSVRVSLTIEKTEEFFRNLGLKTRLDEAGIGDDTIEEIVRRFNERGAAYGEDGDVTGEVARRILQNCKSKKETTDTEGTSMKTVILT…
14071	GC_00002575		PV29FA01	2550	5	5	1	1	0.997414	1	0.998705	COG1979	Alcohol dehydrogenase YqhD, Fe-dependent ADH family (YqdH) (PDB:1OJ7)			C	Energy production and conversion	MDNFIFHNPTRLIFGKGMIAQLSQQIPADKRIMITFGGGSVKTNGVYEQVIQALEGRDYTEFWGIESNPDISTLKKAIESGKEKNIDFLLAVGGGSVIDGTKLISAGIPYNGDAWELVKKGSAQNTIPLGTVLTIPATGSEMNNGAVISCRETHEKYPFFSSHPVFSILDPTVTFSLPDYQIACGLADTFVHVMEQYMTKTNESYLMDRWSESILRTLVQIAPQIKENKQDYHLMSEFMMSATMALNGFIAMGVSEDWATHMIGHELTALHGMTHGQTLAIVFPGTLRTLADKKRDKILQYGERIWGVTSGVPSVRVSLTIEKTEEFFRNLGLKTRLDEAGIGDDTIEEIVRRFNERGAAYGEDGDVTGEVARRILQNCKSKKETTDTEGTSMKTVILT…
14072	GC_00002575		PV2SA01	441	5	5	1	1	0.997414	1	0.998705	COG1979	Alcohol dehydrogenase YqhD, Fe-dependent ADH family (YqdH) (PDB:1OJ7)			C	Energy production and conversion	MDNFIFHNPTRLIFGKGMIAQLSQQIPADKRIMITFGGGSVKTNGVYEQVIQALEGRDYTEFWGIESNPDISTLKKAIESGKEKNIDFLLAVGGGSVIDGTKLISAGIPYDGDAWELVKKGSAQNTIPLGTVLTIPATGSEMNNGAVISCRETHEKYPFFSSHPVFSILDPTVTFSLPDYQIACGLADTFVHVMEQYMTKTNESYLMDRWSESILRTLVQIAPQIKENKQDYHLMSEFMMSATMALNGFIAMGVSEDWATHMIGHELTALHGMTHGQTLAIVFPGTLRTLADKKRDKILQYGERIWGVTSGVPSVRVSLTIEKTEEFFRNLGLKTRLDEAGIGDDAIEEIVRRFNERGAAYGEDGDVTGEVARRILQNCKSKKETTDTEGTSMKTVILT…
14073	GC_00002575		PV2SA02	1116	5	5	1	1	0.997414	1	0.998705	COG1979	Alcohol dehydrogenase YqhD, Fe-dependent ADH family (YqdH) (PDB:1OJ7)			C	Energy production and conversion	MDNFIFHNPTRLIFGKGMIAQLSQQIPADKRIMITFGGGSVKTNGVYEQVIQALEGRDYTEFWGIESNPDISTLKKAIESGKEKNIDFLLAVGGGSVIDGTKLISAGIPYDGDAWELVKKGSAQNTIPLGTVLTIPATGSEMNNGAVISCRETHEKYPFFSSHPVFSILDPTVTFSLPDYQIACGLADTFVHVMEQYMTKTNESYLMDRWSESILRTLVQIAPQIKENKQDYHLMSEFMMSATMALNGFIAMGVSEDWATHMIGHELTALHGMTHGQTLAIVFPGTLRTLADKKRDKILQYGERIWGVTSGVPSVRVSLTIEKTEEFFRNLGLKTRLDEAGIGDDAIEEIVRRFNERGAAYGEDGDVTGEVARRILQNCKSKKETTDTEGTSMKTVILT…
14284	GC_00002619		PV10SA01	2638	5	5	1	1	0.997111	1	0.998553	COG5012	Methanogenic corrinoid protein MtbC1 (MtbC1) (PDB:1Y80)			C	Energy production and conversion	METWKTNLDETKKRYIDWWNHKGIILNMWEHFQEGVKPHADIPAPSPAKDLNQKWFDPQWRAEYLDWYVAHSSLKADILPVANTQLGPGSLAAILGGVFEGGEDTIWIHPDPDFNDEIVFNPEHPNWILHKELLKACKAKANGHYYVGMPDLMEGLDVLAALKGTDKVLLDTVMQPEVLEQQMQQINDIYFKVFDELYDIIREGDEMAFCYFSSWAPGKMSKLQSDISTMISEDDYRRFVQPFIREQCQKIDYTLYHLDGVGAMHHLPALLEIEELNAIQWTPGVGEPQGGSPKWYDLYKKILAGGKSIMACWVTLDELKPLLDNIGADGVHLEMDFHNEREVEQAMRIVEEYSSSSSDVSKEDLSKEEAAATKQETIVVKDSAAAGNEALKPLFNAIV…
14285	GC_00002619		PV26FA01	3539	5	5	1	1	0.997111	1	0.998553	COG5012	Methanogenic corrinoid protein MtbC1 (MtbC1) (PDB:1Y80)			C	Energy production and conversion	METWKTNLDETKKRYIDWWNHKGIILNMWEHFQEDVKPHADIPAPSPAKDLNQKWFDPQWRAEYLDWYVAHSSLKADILPVANTQLGPGSLAAILGGVFEGGEDTIWIHPDPDFNDEIVFNPEHPNWILHKELLKACKAKANGHYYVGMPDLMEGLDVLAALKGTDKVLLDTVMQPEVLEQQMQQINDIYFKVFDELYNIIREGDEMAFCYFSSWAPGKMSKLQSDISTMISEDDYRRFVQPFIREQCQKIDYTLYHLDGVGAMHHLPALLEIEELNAIQWTPGVGEPQGGSPKWYDLYKKILAGGKSIMACWVTLDELKPLLDNIGADGVHLEMDFHNEREVEQAMRIVEEYSSSSSDVSKEDLSKEEAAATKQETIVVKDSAAAGNEALKPLFNAIV…
14286	GC_00002619		PV29FA01	963	5	5	1	1	0.997111	1	0.998553	COG5012	Methanogenic corrinoid protein MtbC1 (MtbC1) (PDB:1Y80)			C	Energy production and conversion	METWKTNLDETKKRYIDWWNHKGIILNMWEHFQEDVKPHADIPAPSPAKDLNQKWFDPQWRAEYLDWYVAHSSLKADILPVANTQLGPGSLAAILGGVFEGGEDTIWIHPDPDFNDEIVFNPEHPNWILHKELLKACKAKANGHYYVGMPDLMEGLDVLAALKGTDKVLLDTVMQPEVLEQQMQQINDIYFKVFDELYDIIREGDEMAFCYFSSWAPGKMSKLQSDISTMISEDDYRRFVQPFIREQCQKIDYTLYHLDGVGAMHHLPALLEIEELNAIQWTPGVGEPQGGSPKWYDLYKKILAGGKSIMACWVTLDELKPLLDNIGADGVHLEMDFHNEREVEQAMRIVEEYSSSSSDVSKEDLSKEEAAATKQETIVLKDSAAAGNEALKPLFNAIV…
14287	GC_00002619		PV2SA01	1242	5	5	1	1	0.997111	1	0.998553	COG5012	Methanogenic corrinoid protein MtbC1 (MtbC1) (PDB:1Y80)			C	Energy production and conversion	METWKTNLDETKKRYIDWWNHKGIILNMWEHFQEGVKPHADIPAPSPAKDLNQKWFDPQWRAEYLDWYVAHSSLKADILPVANTQLGPGSLAAILGGVFEGGEDTIWIHPDPDFNDEIVFNPEHPNWILHKELLKACKAKANGHYYVGMPDLMEGLDVLAALKGTDKVLLDTVMQPEVLEQQMQQINDIYFKVFDELYDIIREGDEMAFCYFSSWAPGKMSKLQSDISTMISEDDYRRFVQPFIREQCQKIDYTLYHLDGVGAMHHLPALLEIEELNAIQWTPGVGEPQGGSPKWYDLYKKILAGGKSIMACWVTLDELKPLLDNIGADGVHLEMDFHNEREVEQAMRIVEEYSSSSSDVSKEDLSKEEAAATKQETIVVKDSAAAGNEALKPLFNAIV…
14288	GC_00002619		PV2SA02	1917	5	5	1	1	0.997111	1	0.998553	COG5012	Methanogenic corrinoid protein MtbC1 (MtbC1) (PDB:1Y80)			C	Energy production and conversion	METWKTNLDETKKRYIDWWNHKGIILNMWEHFQEGVKPHADIPAPSPAKDLNQKWFDPQWRAEYLDWYVAHSSLKADILPVANTQLGPGSLAAILGGVFEGGEDTIWIHPDPDFNDEIVFNPEHPNWILHKELLKACKAKANGHYYVGMPDLMEGLDVLAALKGTDKVLLDTVMQPEVLEQQMQQINDIYFKVFDELYDIIREGDEMAFCYFSSWAPGKMSKLQSDISTMISEDDYRRFVQPFIREQCQKIDYTLYHLDGVGAMHHLPALLEIEELNAIQWTPGVGEPQGGSPKWYDLYKKILAGGKSIMACWVTLDELKPLLDNIGADGVHLEMDFHNEREVEQAMRIVEEYSSSSSDVSKEDLSKEEAAATKQETIVVKDSAAAGNEALKPLFNAIV…
14699	GC_00002702		PV10SA01	974	5	5	1	1	0.996787	1	0.998391	COG0554	Glycerol kinase (GlpK) (PDB:2ZF5)			C	Energy production and conversion	MISRIITIDQSTSATKAMLFSEDCELLHRVNIEHQQFYPQIGWVEHDAEEIYKNTIEAIHCLLEQEEVNGKDISYSLAITNQRETVVVWNRHTGKSVYHAVVWQCQRGAAICKELKDKGYSELVQRKTGLLIDPYFSASGAKWILDNVENGRELAEKGDLLMGTIDSWLIWKLTEGRKHLTDYTNASRTMLFNIHTLDWDEELLKLFTIPRSMMPEALPCDAVFGETTIEGLFKSPIQIAGVLGDSHGALTGQMCFEAGMGKVTYGTGSSVMVNIGEEAVAAPEGLVTSVGFSALGKVYYAFEGNIHCTGATIKWMVEKLGLVDSFNQIETLATSVKNNDGVYLVPAFTGLGAPWWKPDAKAAIWGMTLNAGKAHVLRAGLESIAYQVKDLIDMMTRQA…
14700	GC_00002702		PV26FA01	1103	5	5	1	1	0.996787	1	0.998391	COG0554	Glycerol kinase (GlpK) (PDB:2ZF5)			C	Energy production and conversion	MISRIITIDQSTSATKAMLFSEDCELLHRVNIEHQQFYPQIGWVEHDAEEIYKNTIEAIHCLLEQEEVNGKDISYSLAITNQRETVVVWNRHTGKSVYHAVVWQCQRGAAICKELKDKGYSELVQRKTGLLIDPYFSASGAKWILDNVENARELAEKGDLLMGTIDSWLIWKLTEGRKHLTDYTNASRTMLFNIHTLDWDEELLKLFTIPRNMMPEALPCDAVFGETTIEGLFKSPIQIAGVLGDSHGALTGQMCFEAGMGKVTYGTGSSVMVNIGEEAVAAPEGLVTSVGFSALGKVYYAFEGNIHCTGATIKWMVEKLGLVDSFNQIETLATSVKNNDGVYLVPAFTGLGAPWWKPDAKAAIWGMTLNAGKAHVLRAGLESIAYQVKDLIDMMTRQA…
14701	GC_00002702		PV29FA01	2764	5	5	1	1	0.996787	1	0.998391	COG0554	Glycerol kinase (GlpK) (PDB:2ZF5)			C	Energy production and conversion	MISRIITIDQSTSATKAMLFSEDCELLHRVNIEHQQFYPQIGWVEHDAEEIYKNTIEAIHCLLEQEEVNGKDISYSLAITNQRETVVVWNRHTGKSVYHAVVWQCQRGAAICKELKDKGYSELVQRKTGLLIDPYFSASGAKWILDNVENARELAEKGDLLMGTIDSWLIWKLTEGRKHLTDYTNASRTMLFNIHTLDWDEELLKLFTIPRSMMPEALPCDAVFGETTIEGLFKSPIQIAGVLGDSHGALTGQMCFEAGMGKVTYGTGSSVMVNIGEEAVAAPEGLVTSVGFSALGKVYYAFEGNIHCTGATIKWMVEKLGLVDSFNQIETLATSVKNNDGVYLVPAFTGLGAPWWKPDAKAAIWGMTLNAGKAHVLRAGLESIAYQVKDLIDMMTRQA…
14702	GC_00002702		PV2SA01	209	5	5	1	1	0.996787	1	0.998391	COG0554	Glycerol kinase (GlpK) (PDB:2ZF5)			C	Energy production and conversion	MISRIITIDQSTSATKAMLFSEDCELLHRVNIEHQQFYPQIGWVEHDAEEIYKNTIEAIHCLLEQEEVNGKDISYSLAITNQRETVVVWNRHTGKSVYHAVVWQCQRGAAICKELKDKGYSELVQRKTGLLIDPYFSASGAKWILDNVENARELAEKGDLLMGTIDSWLIWKLTEGRKHLTDYTNASRTMLFNIHTLDWDEELLKLFTIPRNMMPEALPCDAVFGETTIEGLFKSPIQIAGVLGDSHGALTGQMCFEAGMGKVTYGTGSSVMVNIGEEAVAAPEGLVTSVGFSALGKVYYAFEGNIHCTRATIKWMVEKLGLVDSFNQIETLATSVKNNDGVYLVPAFTGLGAPWWKPDAKAAIWGMTLNAGKAHVLRAGLESIAYQVKDLIDMMTRQA…
14703	GC_00002702		PV2SA02	884	5	5	1	1	0.996787	1	0.998391	COG0554	Glycerol kinase (GlpK) (PDB:2ZF5)			C	Energy production and conversion	MISRIITIDQSTSATKAMLFSEDCELLHRVNIEHQQFYPQIGWVEHDAEEIYKNTIEAIHCLLEQEEVNGKDISYSLAITNQRETVVVWNRHTGKSVYHAVVWQCQRGAAICKELKDKGYSELVQRKTGLLIDPYFSASGAKWILDNVENARELAEKGDLLMGTIDSWLIWKLTEGRKHLTDYTNASRTMLFNIHTLDWDEELLKLFTIPRNMMPEALPCDAVFGETTIEGLFKSPIQIAGVLGDSHGALTGQMCFEAGMGKVTYGTGSSVMVNIGEEAVAAPEGLVTSVGFSALGKVYYAFEGNIHCTRATIKWMVEKLGLVDSFNQIETLATSVKNNDGVYLVPAFTGLGAPWWKPDAKAAIWGMTLNAGKAHVLRAGLESIAYQVKDLIDMMTRQA…
15404	GC_00002843		PV10SA01	2575	5	5	1	1	0.996256	1	0.998125	COG1151	Hydroxylamine reductase (hybrid-cluster protein) (Hcp) (PDB:1E1D)			C	Energy production and conversion	MENNMFCFQCQETAKGFGCTLKGVCGKNATTARTMDLLLFVVRGISVVADQLRQHSLPVEKEVDNFIVDALFCTITNANFDDESITKRIDKGLAIRDDLKHQASAKDIPLPEADELNWKGSHDEYDAKAATVGVLREQNEDLRSLKELIMYGLKGMAAYLEHAMRLGHNDESIHRFMQNTIAQITTKSLSADELTALALKTGEIGVRTMALLDKANTSRYGNPEITHVNIGTGTRPGILISGHDLHDLEELLEQTKDSGVDVYTHGEMLPAHYYPAFKKYTHFAGNYGNAWWKQREEFTSFNGPILFTTNCIVPPLPNATYKERMFTTNSTGYPGCKHITADEKGHKDYTEIIETAKQCAAPTEIEHGEIVGGFAHNQVLQLADKVVEAVKSGAIRKFI…
15405	GC_00002843		PV26FA01	3592	5	5	1	1	0.996256	1	0.998125	COG1151	Hydroxylamine reductase (hybrid-cluster protein) (Hcp) (PDB:1E1D)			C	Energy production and conversion	MENNMFCFQCQETAKGFGCTLKGVCGKNATTARTMDLLLFVVRGISVVADQLRQHSLPVEKEVDNFIVDALFCTITNANFDDESITKRIDKGLAIRDDLKHQASAKDIPLPEADELNWKGSHDEYDAKAATVGVLREQNEDLRSLKELIMYGLKGMAAYLEHAMRLGHNDESIHRFMQNTIAQITTKSLSADELTVLALKTGEIGVRTMALLDKANTSRYGNPEITHVNIGTGTRPGILISGHDLHDLEELLEQTKDSGVDVYTHGEMLPAHYYPAFKKYTHFAGNYGNAWWKQREEFTSFNGPILFTTNCIVPPLPNATYKERMFTTNSTGYPGCKHITADEKGHKDYTEIIETAKQCAAPTEIEHGEIVGGFAHNQVLQLADKVVEAVKSGAIRKFI…
15406	GC_00002843		PV29FA01	1019	5	5	1	1	0.996256	1	0.998125	COG1151	Hydroxylamine reductase (hybrid-cluster protein) (Hcp) (PDB:1E1D)			C	Energy production and conversion	MENNMFCFQCQETAKGFGCTLKGVCGKKATTARTMDLLLFVVRGISVVADQLRQHSLPIEKEVDNFIVDALFCTITNANFDDESITKRIDKGLAIRDDLKHQASAKDIPLPEADELNWKGSRDEYDAKAATVGVLREQNEDLRSLKELIMYGLKGMAAYLEHAMRLGHNDESIHRFMQNTIAQITTKSLSADELTVLALKTGEIGVRTMALLDKANTSRYGNPEITHVNIGTGTRPGILISGHDLHDLEELLEQTKDSGVDVYTHGEMLPAHYYPAFKKYTHFAGNYGNAWWKQREEFTSFNGPILFTTNCIVPPLPNATYKERMFTTNSTGYPGCKHITADEKGHKDYTEIIETAKQCAAPTEIEHGEIVGGFAHNQVLQLADKVVEAVKSGAIRKFI…
15407	GC_00002843		PV2SA01	1296	5	5	1	1	0.996256	1	0.998125	COG1151	Hydroxylamine reductase (hybrid-cluster protein) (Hcp) (PDB:1E1D)			C	Energy production and conversion	MENNMFCFQCQETAKGFGCTLKGVCGKNATTARTMDLLLFVVRGISVVADQLRQHSLPIEKEVDNFIVDALFCTITNANFDDESITKRIDKGLAIRDDLKHQASAKDIPLPEADELNWKGNHDEYDAKAATVGVLREQNEDLRSLKELIMYGLKGMAAYLEHAMRLGHNDESIHRFMQNTIAQITTKSLSADELTVLALKTGEIGVRTMALLDKANTSRYGNPEITHVNIGTGTRPGILISGHDLHDLEELLEQTKDSGVDVYTHGEMLPAHYYPAFKKYTHFAGNYGNAWWKQREEFTSFNGPILFTTNCIVPPLPNATYKERMFTTNSTGYPGCKHITADEKGHKDYTEIIETAKQCAAPTEIEHGEIVGGFAHNQVLQLADKVVEAVKSGAIRKFI…
15408	GC_00002843		PV2SA02	1971	5	5	1	1	0.996256	1	0.998125	COG1151	Hydroxylamine reductase (hybrid-cluster protein) (Hcp) (PDB:1E1D)			C	Energy production and conversion	MENNMFCFQCQETAKGFGCTLKGVCGKNATTARTMDLLLFVVRGISVVADQLRQHSLPIEKEVDNFIVDALFCTITNANFDDESITKRIDKGLAIRDDLKHQASAKDIPLPEADELNWKGNHDEYDAKAATVGVLREQNEDLRSLKELIMYGLKGMAAYLEHAMRLGHNDESIHRFMQNTIAQITTKSLSADELTVLALKTGEIGVRTMALLDKANTSRYGNPEITHVNIGTGTRPGILISGHDLHDLEELLEQTKDSGVDVYTHGEMLPAHYYPAFKKYTHFAGNYGNAWWKQREEFTSFNGPILFTTNCIVPPLPNATYKERMFTTNSTGYPGCKHITADEKGHKDYTEIIETAKQCAAPTEIEHGEIVGGFAHNQVLQLADKVVEAVKSGAIRKFI…
15484	GC_00002859		PV10SA01	3321	5	5	1	1	0.998017	1	0.999008	COG4231	TPP-dependent indolepyruvate ferredoxin oxidoreductase, alpha subunit (IorA)			C	Energy production and conversion	MAEKKLLLGDEAIALGAIHAGISGVYAYPGTPSTEITEFIQNNPLAKERKLHSTWCTNEKTAMEAALGMSYAGKRALVCMKHVGMNVAADAFVNSAITGVNGGLVVLAADDPSMHSSQNEQDSRFYGKFAMIPILEPSSQQEAYDMMDYAYTLSEKLKLPVLMRVVTRLAHSRAGVEVADIREENQLNPDHERAHWVLLPGNARKQYLDLVKKQEKLEEVSSKSPYNYLEGLNPEYDYEFGVIACGIGYNYVKEADTDSCHIPVLKVSQYPLPAEEIRTMADRCGYVLVVEDGQPFVEEQVKAILSSDYEVKGRLTETLPRTGELTPDNVGEAIGWGIKRPFGKPQVVMPRPPALCQGCGHRDVYDALNKVAAEYPDARIFGDIGCYTLGALPPFRAID…
15485	GC_00002859		PV26FA01	2894	5	5	1	1	0.998017	1	0.999008	COG4231	TPP-dependent indolepyruvate ferredoxin oxidoreductase, alpha subunit (IorA)			C	Energy production and conversion	MAEKKLLLGDEAIALGAIHAGISGVYAYPGTPSTEITEFIQNNPLAKERKLHSTWCTNEKTAMEAALGMSYAGKRALVCMKHVGMNVAADAFVNSAITGVNGGLVVLAADDPSMHSSQNEQDSRFYGKFAMIPMLEPSSQQEAYDMMDYAYTLSEKLKLPVLMRVVTRLAHSRAGVEVADIREENQLNPDHERAHWVLLPGNARKQYLDLVKKQEKLEEVSSKSPYNYLEGLNPEYDYEFGVIACGIGYNYVKEADTDSCHIPVLKVSQYPLPAEEIRTMADRCGYVLVVEDGQPFVEEQVKAILSSDYEVKGRLTETLPRTGELTPDNVGEAIGWGIKRPFGKPQVVMPRPPALCQGCGHRDVYDALNKVAAEYPDARIFGDIGCYTLGALPPFRAID…
15486	GC_00002859		PV29FA01	103	5	5	1	1	0.998017	1	0.999008	COG4231	TPP-dependent indolepyruvate ferredoxin oxidoreductase, alpha subunit (IorA)			C	Energy production and conversion	MAEKKLLLGDEAIALGAIHAGISGVYAYPGTPSTEITEFIQNNPLAKERKLHSTWCTNEKTAMEAALGMSYAGKRALVCMKHVGMNVAADAFVNSAITGVNGGLVVLAADDPSMHSSQNEQDSRFYGKFAMIPMLEPSSQQEAYDMMDYAYTLSEKLKLPVLMRVVTRLAHSRAGVEVADIREENQLNPDHERAHWVLLPGNARKQYLDLVKKQEKLEEASSKSPYNYLEGLNPEYDYEFGVIACGIGYNYVKEADTDSCHIPVLKVSQYPLPAEEIRTMADRCGYVLVVEDGQPFVEEQVKAILSSDYEVKGRLTETLPRTGELTPDNVGEAIGWGIKRPFGKSQVVMPRPPALCQGCGHRDVYDALNKVAAEYPDARIFGDIGCYTLGALPPFRAID…
15487	GC_00002859		PV2SA01	2553	5	5	1	1	0.998017	1	0.999008	COG4231	TPP-dependent indolepyruvate ferredoxin oxidoreductase, alpha subunit (IorA)			C	Energy production and conversion	MAEKKLLLGDEAIALGAIHAGISGVYAYPGTPSTEITEFIQNNPLAKERKLHSTWCTNEKTAMEAALGMSYAGKRALVCMKHVGMNVAADAFVNSAITGVNGGLVVLAADDPSMHSSQNEQDSRFYGKFAMIPMLEPSSQQEAYDMMDYAYTLSEKLKLPVLMRVVTRLAHSRAGVEVADIREENQLNPDHERAHWVLLPGNARKQYLDLVKKQEKLEEVSSKSPYNYLEGLNPEYDYEFGVIACGIGYNYVKEADTDSCHIPVLKVSQYPLPAEEIRTMADRCGYVLVVEDGQPFVEEQVKAILSSDYEVKGRLTETLPRTGELTPDNVGEAIGWGIKRPFGKSQVVMPRPPALCQGCGHRDVYDALNKVAAEYPDARIFGDIGCYTLGALPPFRAID…
15488	GC_00002859		PV2SA02	3228	5	5	1	1	0.998017	1	0.999008	COG4231	TPP-dependent indolepyruvate ferredoxin oxidoreductase, alpha subunit (IorA)			C	Energy production and conversion	MAEKKLLLGDEAIALGAIHAGISGVYAYPGTPSTEITEFIQNNPLAKERKLHSTWCTNEKTAMEAALGMSYAGKRALVCMKHVGMNVAADAFVNSAITGVNGGLVVLAADDPSMHSSQNEQDSRFYGKFAMIPMLEPSSQQEAYDMMDYAYTLSEKLKLPVLMRVVTRLAHSRAGVEVADIREENQLNPDHERAHWVLLPGNARKQYLDLVKKQEKLEEVSSKSPYNYLEGLNPEYDYEFGVIACGIGYNYVKEADTDSCHIPVLKVSQYPLPAEEIRTMADRCGYVLVVEDGQPFVEEQVKAILSSDYEVKGRLTETLPRTGELTPDNVGEAIGWGIKRPFGKSQVVMPRPPALCQGCGHRDVYDALNKVAAEYPDARIFGDIGCYTLGALPPFRAID…
17777	GC_00003479		PV29FA01	3257	3	3	1	0	0.978994	0.976044	0.977517	COG0546	Phosphoglycolate phosphatase, HAD superfamily (Gph) (PDB:2NYV)			C	Energy production and conversion	MKYKHIVFDIDGTLIDTEYAVINSLIKTITEITGRTPQYESLKFALGITGRNALELLKIPDIEDALKRWDRNMKLLQHTIQPFQGIKECLQSLLSRGYILGIVTSKTYQEYYSDFEPLGLADYFSTIVCADDTDEHKPQAAPLVAYLAKAHVSPENALYIGDSIYDIQCANNAGVDSGLVLWSNNVSNPIRADYYFKTPNDISKIL
17778	GC_00003479		PV2SA01	3299	3	3	1	0	0.978994	0.976044	0.977517	COG0546	Phosphoglycolate phosphatase, HAD superfamily (Gph) (PDB:2NYV)			C	Energy production and conversion	MKYKHIVFDIDGTLIDTEYAVINSLIKTITEITGRTPQYESLKFALGITGRNALELLKILDIEDALKRWDKNMKLLQHTIQPFQGIKECLQSLLSRGYILGIVTSKTYQEYYSDFEPLGLADYFSTIVCADDTDEHKPQAAPLVAYLAKAHVSPENALYIGDSIYDIQCANNAGVDSGLVLWSNNVSNPIRADYYFNVSST-----
17779	GC_00003479		PV2SA02	3974	3	3	1	0	0.978994	0.976044	0.977517	COG0546	Phosphoglycolate phosphatase, HAD superfamily (Gph) (PDB:2NYV)			C	Energy production and conversion	MKYKHIVFDIDGTLIDTEYAVINSLIKTITEITGRTPQYESLKFALGITGRNALELLKILDIEDALKRWDKNMKLLQHTIQPFQGIKECLQSLLSRGYILGIVTSKTYQEYYSDFEPLGLADYFSTIVCADDTDEHKPQAAPLVAYLAKAHVSPENALYIGDSIYDIQCANNAGVDSGLVLWSNNVSNPIRADYYFNVSST-----
19557	GC_00004297		PV29FA01	246	2	2	1	0	0.750466	0.997214	0.856421	COG1035	Coenzyme F420-reducing hydrogenase, beta subunit (FrhB) (PDB:3ZFS)			C	Energy production and conversion	MKVAILSMQEVKNYGSFLQAFSLKKTIESLGNTCEFINIIPGEQLGNYKISKFHKIKLLIQRLWGRDFIRRLSSIYIFQTRFSKEFLPYLGVESERNIRHYDVIVIGSDEVFNCAQKTWFGFSRQLFGEGLNADKIITYAASFGATTVDKLQELGIKKIVGRLLGNISVISVRDANSSITVKTLIGKVPVMHLDPVLIFNYDLFMPSNVTLKNYMIVYTYPGRITDKQEIQSIKDFAKSHRLKLISIGHYFSWCDDVVIPSPFEVLAYFKNASYIVTDTFHGSVFSIKYNKAFCTIIRNMNNQKLSYLLKQFHLESRIINDIDKLDSILTTPIDYKEINEYIAKETRCSIEYLKTNICK
19654	GC_00004364		PV10SA01	2034	2	2	1	0	0.730964	0.980273	0.837458	COG1035	Coenzyme F420-reducing hydrogenase, beta subunit (FrhB) (PDB:3ZFS)			C	Energy production and conversion	MVSREKKQMINLASKETCTGCTACVNVCVYNAIEIVQDCNGFLYPIINENECVGCGLCEKRCPVLSPLSFDNAITPRAFALWSVPDRTVSSSGGAFSAFARKILDNGGIVFGAAFDEKLRCHHIKVDKLEELPPLRGSKYVQSELDGIFLEVKDCLKNGQQVLFTGTPCQIAGLYAYLHKDYDNLLTLDLACHGTPSNAVFQSYLSKLRTLKKCKISSFEFRRRNGWGYSPAISDRGKLIPIFDIENLYMCAFEKAALFRQSCYICPFAKLPRVGDCSIADFWGIGRHGKPFKHNVLRGVSLVLVNNARGMDAIMKLENVFREERTLEESLVENLNIIHPSPLHPQRNEIIQSFLNPHKSLKDISKEYHLLDNSLKGRIKKYASKYHLFDFAKIVYDKY…
19655	GC_00004364		PV29FA01	245	2	2	1	0	0.730964	0.980273	0.837458	COG1035	Coenzyme F420-reducing hydrogenase, beta subunit (FrhB) (PDB:3ZFS)			C	Energy production and conversion	--------MIKLAPFESCTGCTACMNSCSHNAIVMAEDAEGFIFPHINGNKCVECGLCMRVCPVLNTPIITNVTKPNVFAVWSLKDRTVSSSGGAFSAFARNVLEADGVVFGATLGTNLLCYHREIHMIEELEVLRGSKYVQSELRDTFFKVKAYLKEGKNVLFTGTPCQVDGLYRYLRRNYDNLLTLDLVCHGVPSNTLFHSYLLKLEDLKKVKISMFEFRRRNGWGFASAISDRGKLEPIYDIENLYMYAFDKAVLFRKSCYACPYARLPRVGDCSIADFWGIGRHGKSFKHNVLKGVSLVLANNAKGINAVQNLQESFVEERTLDEALAENYNIIHPSPLHPMRDKIIAAFLDSSRSLKSINKEFELIDNSLKERVKEYASRYHIYDLLKNIYNKY…
4684	GC_00000696		PV10SA01	3663	5	5	1	1	1	1	1	COG1838|COG1951	Tartrate dehydratase beta subunit/Fumarate hydratase class I, C-terminal domain (FumA) (PDB:5L2R)|Tartrate dehydratase alpha subunit/Fumarate hydratase class I, N-terminal domain (TtdA) (PDB:5L2R) (PUBMED:15613473)	COG1838|COG1951	TCA cycle|TCA cycle	C|C	Energy production and conversion|Energy production and conversion	MATPPFHYQHMFPLGPDKTEYYLLTKDYVSVSEFEGKPILKIEKEGLTAMANAAFRDVSFLLRRSHNEQVAKILSDPEASDNDKYVALTFLRNAEVSAKGKLPLCQDTGTAIIHGEKGQQVWTGYCDEEALSLGVYKTYTEENLRYSQNAPLTMYDEVNTKCNLPAQIDLEATEGMEYKFLCVTKGGGSANKTYLYQETKAVLNPATLVPFLVEKMKTLGTAACPPYHIAFVIGGTSAEKNLLTVKLASTHYYDELPTTGNEYGRAFRDVELEKQVLEEAYKIGLGAQFGGKYMAHDVRIIRLPRHGASCPIGLGVSCSADRNIKCKINKDGIWIEKMDDKPGELIPAELREAGEGDVVKIDLNQPMADILKELTKYPVATRLSLNGTIIVGRDIAHAK…
4685	GC_00000696		PV26FA01	2487	5	5	1	1	1	1	1	COG1838|COG1951	Tartrate dehydratase beta subunit/Fumarate hydratase class I, C-terminal domain (FumA) (PDB:5L2R)|Tartrate dehydratase alpha subunit/Fumarate hydratase class I, N-terminal domain (TtdA) (PDB:5L2R) (PUBMED:15613473)	COG1838|COG1951	TCA cycle|TCA cycle	C|C	Energy production and conversion|Energy production and conversion	MATPPFHYQHMFPLGPDKTEYYLLTKDYVSVSEFEGKPILKIEKEGLTAMANAAFRDVSFLLRRSHNEQVAKILSDPEASDNDKYVALTFLRNAEVSAKGKLPLCQDTGTAIIHGEKGQQVWTGYCDEEALSLGVYKTYTEENLRYSQNAPLTMYDEVNTKCNLPAQIDLEATEGMEYKFLCVTKGGGSANKTYLYQETKAVLNPATLVPFLVEKMKTLGTAACPPYHIAFVIGGTSAEKNLLTVKLASTHYYDELPTTGNEYGRAFRDVELEKQVLEEAYKIGLGAQFGGKYMAHDVRIIRLPRHGASCPIGLGVSCSADRNIKCKINKDGIWIEKMDDKPGELIPAELREAGEGDVVKIDLNQPMADILKELTKYPVATRLSLNGTIIVGRDIAHAK…
4686	GC_00000696		PV29FA01	4213	5	5	1	1	1	1	1	COG1838|COG1951	Tartrate dehydratase beta subunit/Fumarate hydratase class I, C-terminal domain (FumA) (PDB:5L2R)|Tartrate dehydratase alpha subunit/Fumarate hydratase class I, N-terminal domain (TtdA) (PDB:5L2R) (PUBMED:15613473)	COG1838|COG1951	TCA cycle|TCA cycle	C|C	Energy production and conversion|Energy production and conversion	MATPPFHYQHMFPLGPDKTEYYLLTKDYVSVSEFEGKPILKIEKEGLTAMANAAFRDVSFLLRRSHNEQVAKILSDPEASDNDKYVALTFLRNAEVSAKGKLPLCQDTGTAIIHGEKGQQVWTGYCDEEALSLGVYKTYTEENLRYSQNAPLTMYDEVNTKCNLPAQIDLEATEGMEYKFLCVTKGGGSANKTYLYQETKAVLNPATLVPFLVEKMKTLGTAACPPYHIAFVIGGTSAEKNLLTVKLASTHYYDELPTTGNEYGRAFRDVELEKQVLEEAYKIGLGAQFGGKYMAHDVRIIRLPRHGASCPIGLGVSCSADRNIKCKINKDGIWIEKMDDKPGELIPAELREAGEGDVVKIDLNQPMADILKELTKYPVATRLSLNGTIIVGRDIAHAK…
4687	GC_00000696		PV2SA01	3033	5	5	1	1	1	1	1	COG1838|COG1951	Tartrate dehydratase beta subunit/Fumarate hydratase class I, C-terminal domain (FumA) (PDB:5L2R)|Tartrate dehydratase alpha subunit/Fumarate hydratase class I, N-terminal domain (TtdA) (PDB:5L2R) (PUBMED:15613473)	COG1838|COG1951	TCA cycle|TCA cycle	C|C	Energy production and conversion|Energy production and conversion	MATPPFHYQHMFPLGPDKTEYYLLTKDYVSVSEFEGKPILKIEKEGLTAMANAAFRDVSFLLRRSHNEQVAKILSDPEASDNDKYVALTFLRNAEVSAKGKLPLCQDTGTAIIHGEKGQQVWTGYCDEEALSLGVYKTYTEENLRYSQNAPLTMYDEVNTKCNLPAQIDLEATEGMEYKFLCVTKGGGSANKTYLYQETKAVLNPATLVPFLVEKMKTLGTAACPPYHIAFVIGGTSAEKNLLTVKLASTHYYDELPTTGNEYGRAFRDVELEKQVLEEAYKIGLGAQFGGKYMAHDVRIIRLPRHGASCPIGLGVSCSADRNIKCKINKDGIWIEKMDDKPGELIPAELREAGEGDVVKIDLNQPMADILKELTKYPVATRLSLNGTIIVGRDIAHAK…
4688	GC_00000696		PV2SA02	3708	5	5	1	1	1	1	1	COG1838|COG1951	Tartrate dehydratase beta subunit/Fumarate hydratase class I, C-terminal domain (FumA) (PDB:5L2R)|Tartrate dehydratase alpha subunit/Fumarate hydratase class I, N-terminal domain (TtdA) (PDB:5L2R) (PUBMED:15613473)	COG1838|COG1951	TCA cycle|TCA cycle	C|C	Energy production and conversion|Energy production and conversion	MATPPFHYQHMFPLGPDKTEYYLLTKDYVSVSEFEGKPILKIEKEGLTAMANAAFRDVSFLLRRSHNEQVAKILSDPEASDNDKYVALTFLRNAEVSAKGKLPLCQDTGTAIIHGEKGQQVWTGYCDEEALSLGVYKTYTEENLRYSQNAPLTMYDEVNTKCNLPAQIDLEATEGMEYKFLCVTKGGGSANKTYLYQETKAVLNPATLVPFLVEKMKTLGTAACPPYHIAFVIGGTSAEKNLLTVKLASTHYYDELPTTGNEYGRAFRDVELEKQVLEEAYKIGLGAQFGGKYMAHDVRIIRLPRHGASCPIGLGVSCSADRNIKCKINKDGIWIEKMDDKPGELIPAELREAGEGDVVKIDLNQPMADILKELTKYPVATRLSLNGTIIVGRDIAHAK…
8399	GC_00001441		PV10SA01	1453	5	5	1	1	0.998431	0.9847	0.991518	COG0716|COG1143	Flavodoxin (FldA) (PDB:1AG9)|Formate hydrogenlyase subunit 6/NADH:ubiquinone oxidoreductase 23 kD subunit (chain I) (NuoI) (PDB:1B0P)	COG0716|COG1143	Heme biosynthesis|NADH dehydrogenase	C|C	Energy production and conversion|Energy production and conversion	MIFYFSGTGNSAWVARQLAEGQNEELLSIAMEIDRNKAYKLKEGEKVGFVFPVYAWGPPKIVLRFIHQLKLDKPGYLFFVCTCGDDTGRTAQIFSSAVTRKGWQCVAGYSVTMPNTYVSLPGFDVDDKDIETQKVQNAVARVRFINEEITSRAQMKQYNCHEGALPFTKSYLLRPLFNAFLMSPKPFHATEACIGCKKCEKVCPVGNITVTDRPVWGGNCTQCLACYHVCPVHAVEYGKMTGKKGQYKGRLLKDL----
8400	GC_00001441		PV26FA01	593	5	5	1	1	0.998431	0.9847	0.991518	COG0716|COG1143	Flavodoxin (FldA) (PDB:1AG9)|Formate hydrogenlyase subunit 6/NADH:ubiquinone oxidoreductase 23 kD subunit (chain I) (NuoI) (PDB:1B0P)	COG0716|COG1143	Heme biosynthesis|NADH dehydrogenase	C|C	Energy production and conversion|Energy production and conversion	MIFYFSGTGNSAWVARQLAEGQNEELLSIAMEIDRNKAYKLKEGEKVGFVFPVYAWGPPKIVLRFIHQLKLDKPGYLFFVCTCGDDTGRTAQIFSSAVTRKGWQCVAGYSVTMPNTYVSLPGFDVDDKDIETQKVQNAVARVRFINEEITSRAQMKQYNCHEGALPFTKSYLLRPLFNAFLMSPKPFHATEACIGCKKCEKVCPVGNITVTDRPVWGGNCTQCLACYHVCPVHAVEYGKMTGKKGQYKGRLLKDSIDTH
8401	GC_00001441		PV29FA01	2179	5	5	1	1	0.998431	0.9847	0.991518	COG0716|COG1143	Flavodoxin (FldA) (PDB:1AG9)|Formate hydrogenlyase subunit 6/NADH:ubiquinone oxidoreductase 23 kD subunit (chain I) (NuoI) (PDB:1B0P)	COG0716|COG1143	Heme biosynthesis|NADH dehydrogenase	C|C	Energy production and conversion|Energy production and conversion	MIFYFSGTGNSAWVARQLAEGQNEELLSIAMEIDRNKAYKLKEGEKVGFVFPVYAWGPPKIVLRFIHQLKLDKPGYLFFVCTCGDDTGRTAQIFSSAVTRKGWQCVAGYSVTMPNTYVSLPGFDVDDKDIETQKVQNAVARVRFINEEITSRAQMKQYNCHEGALPFTKSYLLRPLFNAFLMSPKPFHATEACIGCKKCEKVCPVGNITVTDRPVWGGNCTQCLACYHVCPVHAVEYGKMTGKKGQYKGRLLKDL----
8402	GC_00001441		PV2SA01	820	5	5	1	1	0.998431	0.9847	0.991518	COG0716|COG1143	Flavodoxin (FldA) (PDB:1AG9)|Formate hydrogenlyase subunit 6/NADH:ubiquinone oxidoreductase 23 kD subunit (chain I) (NuoI) (PDB:1B0P)	COG0716|COG1143	Heme biosynthesis|NADH dehydrogenase	C|C	Energy production and conversion|Energy production and conversion	MIFYFSGTGNSAWVARQLAEGQNEELLSIAMEIDRNKAYKLKEGEKVGFVFPVYAWGPPKIVLRFIHQLKLDKPGYLFFVCTCGDDTGRTAQIFSSAVTRKGWQCVAGYSVTMPNTYVSLPGFDVDDKDIETQKVQNAVARVRFINEEITSRAQMKQYNCHEGALPFTKSYLLRPLFNAFLMSPKPFHATEACIGCKKCEKVCPVGNITVTDRPVWGGNCTQCLACYHVCPVHAVEYGKMTGKKGQYKGRLLKDL----
8403	GC_00001441		PV2SA02	1495	5	5	1	1	0.998431	0.9847	0.991518	COG0716|COG1143	Flavodoxin (FldA) (PDB:1AG9)|Formate hydrogenlyase subunit 6/NADH:ubiquinone oxidoreductase 23 kD subunit (chain I) (NuoI) (PDB:1B0P)	COG0716|COG1143	Heme biosynthesis|NADH dehydrogenase	C|C	Energy production and conversion|Energy production and conversion	MIFYFSGTGNSAWVARQLAEGQNEELLSIAMEIDRNKAYKLKEGEKVGFVFPVYAWGPPKIVLRFIHQLKLDKPGYLFFVCTCGDDTGRTAQIFSSAVTRKGWQCVAGYSVTMPNTYVSLPGFDVDDKDIETQKVQNAVARVRFINEEITSRAQMKQYNCHEGALPFTKSYLLRPLFNAFLMSPKPFHATEACIGCKKCEKVCPVGNITVTDRPVWGGNCTQCLACYHVCPVHAVEYGKMTGKKGQYKGRLLKDL----
6909	GC_00001143		PV10SA01	238	5	5	1	1	0.999783	1	0.999892	COG0674|COG1014	Pyruvate:ferredoxin oxidoreductase or related 2-oxoacid:ferredoxin oxidoreductase, alpha subunit (PorA) (PDB:5C4I)|Pyruvate:ferredoxin oxidoreductase or related 2-oxoacid:ferredoxin oxidoreductase, gamma subunit (PorG) (PDB:1B0P)	COG0674|COG1014	Pyruvate oxidation|Pyruvate oxidation	C|C	Energy production and conversion|Energy production and conversion	MADEMIVKELDQVVVRFSGDSGDGMQLAGNIFSNISATVGNDISTFPDYPADIRAPQGSLTGVSGFQVHIGAGKVFTPGDKCDVLVAMNAAALKTQYKFAKSTACIIIDTDCFQKSDLDKAAFKTDNPIEEMGIKQDVIAAPISQMVKDCLADTGMDNKSMLKCRNMFALGLVCWLFNRDLAVAENFLREKFAKKPQIAEANIKVIHAGYDYGHNTHASVDHTYKVETKSKVPGKYMDISGNKATAYGLIAAAEKAGLRLFLGSYPITPATDILHELSKHKSLGVTTVQCEDEISGCATAIGASFAGALAATSTSGPGVCLKSEAMNLAVITELPLVVINVQRGGPSTGLPTKSEQTDLLQALFGRNGESPMPVIAAASPTHCFDAAYDACKIALEHMT…
6910	GC_00001143		PV26FA01	1727	5	5	1	1	0.999783	1	0.999892	COG0674|COG1014	Pyruvate:ferredoxin oxidoreductase or related 2-oxoacid:ferredoxin oxidoreductase, alpha subunit (PorA) (PDB:5C4I)|Pyruvate:ferredoxin oxidoreductase or related 2-oxoacid:ferredoxin oxidoreductase, gamma subunit (PorG) (PDB:1B0P)	COG0674|COG1014	Pyruvate oxidation|Pyruvate oxidation	C|C	Energy production and conversion|Energy production and conversion	MADEMIVKELDQVVVRFSGDSGDGMQLAGNIFSNISATVGNDISTFPDYPADIRAPQGSLTGVSGFQVHIGAGKVFTPGDKCDVLVAMNAAALKTQYKFAKSTACIIIDTDCFQKSDLDKAAFKTDNPIEEMGIKQDVIAAPISQMVKDCLADTGMDNKSMLKCRNMFALGLVCWLFNRDLAVAENFLREKFAKKPQIAEANIKVIHAGYDYGHNTHASVDHTYKVETKSKVPGKYMDISGNKATAYGLIAAAEKAGLRLFLGSYPITPATDILHELSKHKSLGVTTVQCEDEISGCATAIGASFAGALAATSTSGPGVCLKSEAMNLAVITELPLVVINVQRGGPSTGLPTKSEQTDLLQALFGRNGESPMPVIAAASPTHCFDAAYDACKIALEHMT…
6911	GC_00001143		PV29FA01	3831	5	5	1	1	0.999783	1	0.999892	COG0674|COG1014	Pyruvate:ferredoxin oxidoreductase or related 2-oxoacid:ferredoxin oxidoreductase, alpha subunit (PorA) (PDB:5C4I)|Pyruvate:ferredoxin oxidoreductase or related 2-oxoacid:ferredoxin oxidoreductase, gamma subunit (PorG) (PDB:1B0P)	COG0674|COG1014	Pyruvate oxidation|Pyruvate oxidation	C|C	Energy production and conversion|Energy production and conversion	MADEMIVKELDQVVVRFSGDSGDGMQLVGNIFSNISATVGNDISTFPDYPADIRAPQGSLTGVSGFQVHIGAGKVFTPGDKCDVLVAMNAAALKTQYKFAKSTACIIIDTDCFQKSDLDKAAFKTDNPIEEMGIKQDVIAAPISQMVKDCLADTGMDNKSMLKCRNMFALGLVCWLFNRDLAVAENFLREKFAKKPQIAEANIKVIHAGYDYGHNTHASVDHTYKVETKSKVPGKYMDISGNKATAYGLIAAAEKAGLRLFLGSYPITPATDILHELSKHKSLGVTTVQCEDEISGCATAIGASFAGALAATSTSGPGVCLKSEAMNLAVITELPLVVINVQRGGPSTGLPTKSEQTDLLQALFGRNGESPMPVIAAASPTHCFDAAYDACKIALEHMT…
6912	GC_00001143		PV2SA01	3843	5	5	1	1	0.999783	1	0.999892	COG0674|COG1014	Pyruvate:ferredoxin oxidoreductase or related 2-oxoacid:ferredoxin oxidoreductase, alpha subunit (PorA) (PDB:5C4I)|Pyruvate:ferredoxin oxidoreductase or related 2-oxoacid:ferredoxin oxidoreductase, gamma subunit (PorG) (PDB:1B0P)	COG0674|COG1014	Pyruvate oxidation|Pyruvate oxidation	C|C	Energy production and conversion|Energy production and conversion	MADEMIVKELDQVVVRFSGDSGDGMQLAGNIFSNISATVGNDISTFPDYPADIRAPQGSLTGVSGFQVHIGAGKVFTPGDKCDVLVAMNAAALKTQYKFAKSTACIIIDTDCFQKSDLDKAAFKTDNPIEEMGIKQDVIAAPISQMVKDCLADTGMDNKSMLKCRNMFALGLVCWLFNRDLAVAENFLREKFAKKPQIAEANIKVIHAGYDYGHNTHASVDHTYKVETKSKVPGKYMDISGNKATAYGLIAAAEKAGLRLFLGSYPITPATDILHELSKHKSLGVTTVQCEDEISGCATAIGASFAGALAATSTSGPGVCLKSEAMNLAVITELPLVVINVQRGGPSTGLPTKSEQTDLLQALFGRNGESPMPVIAAASPTHCFDAAYDACKIALEHMT…
6913	GC_00001143		PV2SA02	324	5	5	1	1	0.999783	1	0.999892	COG0674|COG1014	Pyruvate:ferredoxin oxidoreductase or related 2-oxoacid:ferredoxin oxidoreductase, alpha subunit (PorA) (PDB:5C4I)|Pyruvate:ferredoxin oxidoreductase or related 2-oxoacid:ferredoxin oxidoreductase, gamma subunit (PorG) (PDB:1B0P)	COG0674|COG1014	Pyruvate oxidation|Pyruvate oxidation	C|C	Energy production and conversion|Energy production and conversion	MADEMIVKELDQVVVRFSGDSGDGMQLAGNIFSNISATVGNDISTFPDYPADIRAPQGSLTGVSGFQVHIGAGKVFTPGDKCDVLVAMNAAALKTQYKFAKSTACIIIDTDCFQKSDLDKAAFKTDNPIEEMGIKQDVIAAPISQMVKDCLADTGMDNKSMLKCRNMFALGLVCWLFNRDLAVAENFLREKFAKKPQIAEANIKVIHAGYDYGHNTHASVDHTYKVETKSKVPGKYMDISGNKATAYGLIAAAEKAGLRLFLGSYPITPATDILHELSKHKSLGVTTVQCEDEISGCATAIGASFAGALAATSTSGPGVCLKSEAMNLAVITELPLVVINVQRGGPSTGLPTKSEQTDLLQALFGRNGESPMPVIAAASPTHCFDAAYDACKIALEHMT…
12019	GC_00002165		PV10SA01	3759	5	5	1	1	0.999615	1	0.999807	COG0649|COG0852	NADH:ubiquinone oxidoreductase 49 kD subunit (chain D) (NuoD) (PDB:2FUG)|NADH:ubiquinone oxidoreductase 27 kD subunit (chain C) (NuoC)	COG0649|COG0852	NADH dehydrogenase|NADH dehydrogenase	C|C	Energy production and conversion|Energy production and conversion	MSERIEIPAEKLHEEMLKLRQGKHMDFLRSLTGMDWGEEGLGVVYHLEDTNTRENIVVSTRTTNREKPELPSVSDIWKGAEFNEREVYDYYGIRFIGHPDMRRLFLRDDWVGYPLRKDYDESLNPLRMTNEEPVDTTQYIEVQHDGSVIEKRETIFDEDEYIINIGPQHPATHGVLRFRVSLEGEIIKKLDVHCGYIHRGIEKMCESLTYPQTLALTDRLDYLGAHQNRHALCMCIEQAMGVEVSERVQYIRTIMDELQRIDSHLLFFSCLCMDMGALTAFFYGFRDREKILDIFEATTGGRLIQNYNTIGGVQADIAPDFVQKVKEFIAYLRPMLKEYHEVFTGNVIAQERLKGVGVLSREDAISFGATGGTGRASGWACDVRKRHPYAMYGKVDFKE…
12020	GC_00002165		PV26FA01	2391	5	5	1	1	0.999615	1	0.999807	COG0649|COG0852	NADH:ubiquinone oxidoreductase 49 kD subunit (chain D) (NuoD) (PDB:2FUG)|NADH:ubiquinone oxidoreductase 27 kD subunit (chain C) (NuoC)	COG0649|COG0852	NADH dehydrogenase|NADH dehydrogenase	C|C	Energy production and conversion|Energy production and conversion	MSERIEIPAEKLHEEMLKLRQGKHMDFLRSLTGMDWGEEGLGVVYHLEDTNTRENIVVSTRTTNREKPELPSVSDIWKGAEFNEREVYDYYGIRFIGHPDMRRLFLRDDWVGYPLRKDYDESLNPLRMTNEEPVDTTQYIEVQHDGSVIEKRETIFDEDEYIINIGPQHPATHGVLRFRVSLEGEIIKKLDVHCGYIHRGIEKMCESLTYPQTLALTDRLDYLGAHQNRHALCMCIEQAMGVEVSERVQYIRTIMDELQRIDSHLLFFSCLCMDMGALTAFFYGFRDREKILDIFEATTGGRLIQNYNTIGGVQADIAPDFVQKVKEFIAYLRPMLKEYHEVFTGNVIAQERLKGVGVLSREDAISFGATGGTGRASGWACDVRKRHPYAMYGKVDFKE…
12021	GC_00002165		PV29FA01	4117	5	5	1	1	0.999615	1	0.999807	COG0649|COG0852	NADH:ubiquinone oxidoreductase 49 kD subunit (chain D) (NuoD) (PDB:2FUG)|NADH:ubiquinone oxidoreductase 27 kD subunit (chain C) (NuoC)	COG0649|COG0852	NADH dehydrogenase|NADH dehydrogenase	C|C	Energy production and conversion|Energy production and conversion	MSERIEIPAEKLHEEMLKLRQGKHMDFLRSLTGMDWGEEGLGVVYHLEDTNTRENIVVSTRTTNREKPELPSVSDIWKGAEFNEREVYDYYGIRFIGHPDMRRLFLRDDWVGYPLRKDYDESLNPLRMTNEEPVDTTQYIEVQHDGSVIEKRETIFDEDEYIINIGPQHPATHGVLRFRVSLEGEIIKKLDVHCGYIHRGIEKMCESLTYPQTLALTDRLDYLGAHQNRHALCMCIEQAMGVEVSERVQYIRTIMDELQRIDSHLLFFSCLCMDMGALTAFFYGFRDREKILDIFEATTGGRLIQNYNTIGGVQADIAPDFVQKVKEFIAYLRPMLKEYHEVFTGNVIAQERLKGVGVLSREDAISFGATGGTGRASGWACDVRKRHPYAMYGKVDFKE…
12022	GC_00002165		PV2SA01	3126	5	5	1	1	0.999615	1	0.999807	COG0649|COG0852	NADH:ubiquinone oxidoreductase 49 kD subunit (chain D) (NuoD) (PDB:2FUG)|NADH:ubiquinone oxidoreductase 27 kD subunit (chain C) (NuoC)	COG0649|COG0852	NADH dehydrogenase|NADH dehydrogenase	C|C	Energy production and conversion|Energy production and conversion	MSERIEIPAEKLHEEMLKLRQGKHMDFLRSLTGMDWGEEGLGVVYHLEDTNTRENIMVSTRTTNREKPELPSVSDIWKGAEFNEREVYDYYGIRFIGHPDMRRLFLRDDWVGYPLRKDYDESLNPLRMTNEEPVDTTQYIEVQHDGSVIEKRETIFDEDEYIINIGPQHPATHGVLRFRVSLEGEIIKKLDVHCGYIHRGIEKMCESLTYPQTLALTDRLDYLGAHQNRHALCMCIEQAMGVEVSERVQYIRTIMDELQRIDSHLLFFSCLCMDMGALTAFFYGFRDREKILDIFEATTGGRLIQNYNTIGGVQADIAPDFVQKVKEFIAYLRPMLKEYHEVFTGNVIAQERLKGVGVLSREDAISFGATGGTGRASGWACDVRKRHPYAMYGKVDFKE…
12023	GC_00002165		PV2SA02	3801	5	5	1	1	0.999615	1	0.999807	COG0649|COG0852	NADH:ubiquinone oxidoreductase 49 kD subunit (chain D) (NuoD) (PDB:2FUG)|NADH:ubiquinone oxidoreductase 27 kD subunit (chain C) (NuoC)	COG0649|COG0852	NADH dehydrogenase|NADH dehydrogenase	C|C	Energy production and conversion|Energy production and conversion	MSERIEIPAEKLHEEMLKLRQGKHMDFLRSLTGMDWGEEGLGVVYHLEDTNTRENIMVSTRTTNREKPELPSVSDIWKGAEFNEREVYDYYGIRFIGHPDMRRLFLRDDWVGYPLRKDYDESLNPLRMTNEEPVDTTQYIEVQHDGSVIEKRETIFDEDEYIINIGPQHPATHGVLRFRVSLEGEIIKKLDVHCGYIHRGIEKMCESLTYPQTLALTDRLDYLGAHQNRHALCMCIEQAMGVEVSERVQYIRTIMDELQRIDSHLLFFSCLCMDMGALTAFFYGFRDREKILDIFEATTGGRLIQNYNTIGGVQADIAPDFVQKVKEFIAYLRPMLKEYHEVFTGNVIAQERLKGVGVLSREDAISFGATGGTGRASGWACDVRKRHPYAMYGKVDFKE…
15024	GC_00002767		PV10SA01	12	5	5	1	1	0.994882	1	0.997434	COG0348|COG1143	Polyferredoxin NapH (NapH) (PUBMED:27322068)|Formate hydrogenlyase subunit 6/NADH:ubiquinone oxidoreductase 23 kD subunit (chain I) (NuoI) (PDB:1B0P)	COG0348|COG1143	NADH dehydrogenase	C|C	Energy production and conversion|Energy production and conversion	MLRKIRLAAALLFFTMITLLFLDFTGTVHGWFGWMAKIQFLPAVLALNVGVVIALVLLTLLLGRVYCSVICPLGVFQDIISWVSGKVKKNRFHYSPALSWLRYGVLAVFIVALVAGVVSLTALIAPYSAYGRIISNLLTPLYQWGNNVLALWAERVDSYAFYSVDVWMKGLSTFVVAVGTVIVLFILAWRGGRTYCNTICPVGTVLGLLSRYSYFKPVIDTSKCNGCGLCARNCKSSCINPKAHEIDYSRCVACMDCLGKCRQGAIKYVSGQMLLKKQAPASEGIGKQVSQASLNKEKVDTARRGFFTVSALIAASVAVKAQEKKVDGGLAPLIDKKVPKRATPIVPAGALSFRHFAQHCTACQLCVSVCPNQVLRPSGDLKHLMQPEMSYERGYCRPE…
15025	GC_00002767		PV26FA01	1319	5	5	1	1	0.994882	1	0.997434	COG0348|COG1143	Polyferredoxin NapH (NapH) (PUBMED:27322068)|Formate hydrogenlyase subunit 6/NADH:ubiquinone oxidoreductase 23 kD subunit (chain I) (NuoI) (PDB:1B0P)	COG0348|COG1143	NADH dehydrogenase	C|C	Energy production and conversion|Energy production and conversion	MLRKIRLAAALLFFTMITLLFLDFTGTVHGWFGWMAKIQFLPAVLALNVGVVIALVLLTLLLGRVYCSVICPLGVFQDIISWVSGKVKKNRFRYSPALSWLRYGVLAVFVVALVAGVVSLAALIAPYSAYGRIISNLLTPLYQWGNNVLALWAERVDSYAFYSVDVWMKGLSTFAVAVGTVIVLFILAWRGGRTYCNTICPVGTVLGFLSRYSYFKPVIDTSKCNGCGLCARNCKSSCINPKAHEIDYSRCVACMDCLGKCRQGAIKYVSGQMLLKKQAPASEGIGKQVSQASLNKEKVDTARRGFFTVSALIAASVAVKAQEKKVDGGLAPLIDKKVPKRATPIVPAGALSFRHFAQHCTACQLCVSVCPNQVLRPSGDLKHLMQPEMSYERGYCRPE…
15026	GC_00002767		PV29FA01	2989	5	5	1	1	0.994882	1	0.997434	COG0348|COG1143	Polyferredoxin NapH (NapH) (PUBMED:27322068)|Formate hydrogenlyase subunit 6/NADH:ubiquinone oxidoreductase 23 kD subunit (chain I) (NuoI) (PDB:1B0P)	COG0348|COG1143	NADH dehydrogenase	C|C	Energy production and conversion|Energy production and conversion	MLRKIRLAAALLFFTMITLLFLDFTGTVHGWFGWMAKIQFLPAVLALNVGVVIALVLLTLLLGRVYCSVICPLGVFQDIISWVSGKVKKNRFRYSPALSWLRYGVLAVFVVALVAGVVSLAALIAPYSAYGRIVSNLLTPLYQWGNNVLALWAERVDSYAFYSVDVWMKGLSTFAVAVGTVIVLFILAWRGGRTYCNTICPVGTVLGFLSRYSYFKPVIDTSKCNGCGLCARNCKSSCINPKAHEIDYSRCVACMDCLGKCRQGAIKYVSGQMLLKKQTPASEGIGKQVSQASLNKEKVDTARRGFFTVSALIAASVAVKAQEKKVDGGLAPLIDKKVPKRATPIVPAGALSFRHFAQHCTACQLCVSVCPNQVLRPSGDLKHLMQPEMSYERGYCRPE…
15027	GC_00002767		PV2SA01	3496	5	5	1	1	0.994882	1	0.997434	COG0348|COG1143	Polyferredoxin NapH (NapH) (PUBMED:27322068)|Formate hydrogenlyase subunit 6/NADH:ubiquinone oxidoreductase 23 kD subunit (chain I) (NuoI) (PDB:1B0P)	COG0348|COG1143	NADH dehydrogenase	C|C	Energy production and conversion|Energy production and conversion	MLRKIRLAAALLFFTMITLLFLDFTGTVHGWFGWMAKIQFLPAVLALNVGVVIALVLLTLLLGRVYCSVICPLGVFQDIISWVSGKVKKNRFRYSPALSWLRYGVLAVFVVALVAGAVSLAALIAPYSAYGRIVSNLLTPLYQWGNNVLALWAERVDSYAFYSVDVWMKGLSTFAVAVGTVIVLFILAWRGGRTYCNTICPVGTVLGFLSRYSYFKPVIDTSKCNGCGLCARNCKSSCINPKAHEIDYSRCVACMDCLGKCRQGAIKYVSGQMLLKKQAPASEGIGKQVSQASLNKEKVDTARRGFFTVSALIAASVAVKAQEKKVDGGLAPLIDKKVPKRATPIVPAGALSFRHFAQHCTACQLCVSVCPNQVLRPSGDLKHLMQPEMSYERGYCRPE…
15028	GC_00002767		PV2SA02	672	5	5	1	1	0.994882	1	0.997434	COG0348|COG1143	Polyferredoxin NapH (NapH) (PUBMED:27322068)|Formate hydrogenlyase subunit 6/NADH:ubiquinone oxidoreductase 23 kD subunit (chain I) (NuoI) (PDB:1B0P)	COG0348|COG1143	NADH dehydrogenase	C|C	Energy production and conversion|Energy production and conversion	MLRKIRLAAALLFFTMITLLFLDFTGTVHGWFGWMAKIQFLPAVLALNVGVVIALVLLTLLLGRVYCSVICPLGVFQDIISWVSGKVKKNRFRYSPALSWLRYGVLAVFVVALVAGAVSLAALIAPYSAYGRIVSNLLTPLYQWGNNVLALWAERVDSYAFYSVDVWMKGLSTFAVAVGTVIVLFILAWRGGRTYCNTICPVGTVLGFLSRYSYFKPVIDTSKCNGCGLCARNCKSSCINPKAHEIDYSRCVACMDCLGKCRQGAIKYVSGQMLLKKQAPASEGIGKQVSQASLNKEKVDTARRGFFTVSALIAASVAVKAQEKKVDGGLAPLIDKKVPKRATPIVPAGALSFRHFAQHCTACQLCVSVCPNQVLRPSGDLKHLMQPEMSYERGYCRPE…
3609	GC_00000481		PV10SA01	1103	5	5	1	1	1	1	1	COG0280|COG0281	Phosphotransacetylase (includes Pta, EutD and phosphobutyryltransferase) (Pta) (PDB:1QZT) (PUBMED:28754323)|Malic enzyme (SfcA) (PDB:1DO8)	COG0280|COG0281	Urea cycle	C|C	Energy production and conversion|Energy production and conversion	MVKITKEAALLYHSQGKPGKIEVVPTKPYSTQTDLSLAYSPGVAEPCLEIEKDPQTAYDYTAKGNLVAVISNGTAVLGLGDIGALSGKPVMEGKGLLFKIYAGIDVFDIEVNEKDPEKFIQAVKAIAPTFGGINLEDIKAPECFEIENRLKEELDIPVMHDDQHGTAIISSAGLLNALEVAGKKIENVRIVVNGAGASATSCTKLYVALGARKENILMLDSKGVITSDRPNLTESKKFFATDRRDVHTLEEAIKGADVFLGLSKGNVLTQDMVRSMADHPIVFALANPTPEISYEDAMASRPDVLMSTGRSDYPNQINNVIGFPYIFRGALDTQAKAINEEMKLAAVHAIADLAKQPVPDVVNEAYHVNNFTFGPDYFIPKPVDPRLITEVSMAVAKAA…
3610	GC_00000481		PV26FA01	974	5	5	1	1	1	1	1	COG0280|COG0281	Phosphotransacetylase (includes Pta, EutD and phosphobutyryltransferase) (Pta) (PDB:1QZT) (PUBMED:28754323)|Malic enzyme (SfcA) (PDB:1DO8)	COG0280|COG0281	Urea cycle	C|C	Energy production and conversion|Energy production and conversion	MVKITKEAALLYHSQGKPGKIEVVPTKPYSTQTDLSLAYSPGVAEPCLEIEKDPQTAYDYTAKGNLVAVISNGTAVLGLGDIGALSGKPVMEGKGLLFKIYAGIDVFDIEVNEKDPEKFIQAVKAIAPTFGGINLEDIKAPECFEIENRLKEELDIPVMHDDQHGTAIISSAGLLNALEVAGKKIENVRIVVNGAGASATSCTKLYVALGARKENILMLDSKGVITSDRPNLTESKKFFATDRRDVHTLEEAIKGADVFLGLSKGNVLTQDMVRSMADHPIVFALANPTPEISYEDAMASRPDVLMSTGRSDYPNQINNVIGFPYIFRGALDTQAKAINEEMKLAAVHAIADLAKQPVPDVVNEAYHVNNFTFGPDYFIPKPVDPRLITEVSMAVAKAA…
3611	GC_00000481		PV29FA01	2591	5	5	1	1	1	1	1	COG0280|COG0281	Phosphotransacetylase (includes Pta, EutD and phosphobutyryltransferase) (Pta) (PDB:1QZT) (PUBMED:28754323)|Malic enzyme (SfcA) (PDB:1DO8)	COG0280|COG0281	Urea cycle	C|C	Energy production and conversion|Energy production and conversion	MVKITKEAALLYHSQGKPGKIEVVPTKPYSTQTDLSLAYSPGVAEPCLEIEKDPQTAYDYTAKGNLVAVISNGTAVLGLGDIGALSGKPVMEGKGLLFKIYAGIDVFDIEVNEKDPEKFIQAVKAIAPTFGGINLEDIKAPECFEIENRLKEELDIPVMHDDQHGTAIISSAGLLNALEVAGKKIENVRIVVNGAGASATSCTKLYVALGARKENILMLDSKGVITSDRPNLTESKKFFATDRRDVHTLEEAIKGADVFLGLSKGNVLTQDMVRSMADHPIVFALANPTPEISYEDAMASRPDVLMSTGRSDYPNQINNVIGFPYIFRGALDTQAKAINEEMKLAAVHAIADLAKQPVPDVVNEAYHVNNFTFGPDYFIPKPVDPRLITEVSMAVAKAA…
3612	GC_00000481		PV2SA01	391	5	5	1	1	1	1	1	COG0280|COG0281	Phosphotransacetylase (includes Pta, EutD and phosphobutyryltransferase) (Pta) (PDB:1QZT) (PUBMED:28754323)|Malic enzyme (SfcA) (PDB:1DO8)	COG0280|COG0281	Urea cycle	C|C	Energy production and conversion|Energy production and conversion	MVKITKEAALLYHSQGKPGKIEVVPTKPYSTQTDLSLAYSPGVAEPCLEIEKDPQTAYDYTAKGNLVAVISNGTAVLGLGDIGALSGKPVMEGKGLLFKIYAGIDVFDIEVNEKDPEKFIQAVKAIAPTFGGINLEDIKAPECFEIENRLKEELDIPVMHDDQHGTAIISSAGLLNALEVAGKKIENVRIVVNGAGASATSCTKLYVALGARKENILMLDSKGVITSDRPNLTESKKFFATDRRDVHTLEEAIKGADVFLGLSKGNVLTQDMVRSMADHPIVFALANPTPEISYEDAMASRPDVLMSTGRSDYPNQINNVIGFPYIFRGALDTQAKAINEEMKLAAVHAIADLAKQPVPDVVNEAYHVNNFTFGPDYFIPKPVDPRLITEVSMAVAKAA…
3613	GC_00000481		PV2SA02	1066	5	5	1	1	1	1	1	COG0280|COG0281	Phosphotransacetylase (includes Pta, EutD and phosphobutyryltransferase) (Pta) (PDB:1QZT) (PUBMED:28754323)|Malic enzyme (SfcA) (PDB:1DO8)	COG0280|COG0281	Urea cycle	C|C	Energy production and conversion|Energy production and conversion	MVKITKEAALLYHSQGKPGKIEVVPTKPYSTQTDLSLAYSPGVAEPCLEIEKDPQTAYDYTAKGNLVAVISNGTAVLGLGDIGALSGKPVMEGKGLLFKIYAGIDVFDIEVNEKDPEKFIQAVKAIAPTFGGINLEDIKAPECFEIENRLKEELDIPVMHDDQHGTAIISSAGLLNALEVAGKKIENVRIVVNGAGASATSCTKLYVALGARKENILMLDSKGVITSDRPNLTESKKFFATDRRDVHTLEEAIKGADVFLGLSKGNVLTQDMVRSMADHPIVFALANPTPEISYEDAMASRPDVLMSTGRSDYPNQINNVIGFPYIFRGALDTQAKAINEEMKLAAVHAIADLAKQPVPDVVNEAYHVNNFTFGPDYFIPKPVDPRLITEVSMAVAKAA…
4914	GC_00000742		PV10SA01	1707	5	5	1	1	1	1	1	COG0674|COG1013|COG1014|COG1143	Pyruvate:ferredoxin oxidoreductase or related 2-oxoacid:ferredoxin oxidoreductase, alpha subunit (PorA) (PDB:5C4I)|Pyruvate:ferredoxin oxidoreductase or related 2-oxoacid:ferredoxin oxidoreductase, beta subunit (PorB) (PDB:1B0P)|Pyruvate:ferredoxin oxidoreductase or related 2-oxoacid:ferredoxin oxidoreductase, gamma subunit (PorG) (PDB:1B0P)|Formate hydrogenlyase subunit 6/NADH:ubiquinone oxidore…	COG0674|COG1013|COG1014|COG1143	Pyruvate oxidation|Pyruvate oxidation|Pyruvate oxidation|NADH dehydrogenase	C|C|C|C	Energy production and conversion|Energy production and conversion|Energy production and conversion|Energy production and conversion	MTKQKKFITCDGNQAAAHISYMFSEVAAIYPITPSSTMAEYVDEWAAAGRKNIFGETVLVQEMQSEGGAAGAVHGSLQAGALTTTYTASQGLLLMIPNMYKIAGEFLPCVFHVSARTLASHALCIFGDHQDVMSCRQTGFAMLCEGSVQEVMDMAAVAHLATIKSRVPFVNFFDGFRTSHEIQKIEMLENEDLAGLIDQQALAEFRQRALNPNNPVARGMAENPDHFFQHRESCNNFYEAVPAIVEEYMNEISKITGRPHGLFDYYGAEDAERVIIAMGSVTEAAREAIDYLMSKGEKVGLVSVHLYRPFSAKHFLAAVPKTAKTIAVLDRTKEPGANGEPLYLDVKDCFYGTENAPVIVGGRYGLGSKDTTPAQIIAVFKNLALPMPKNHFTVGIVDD…
4915	GC_00000742		PV26FA01	327	5	5	1	1	1	1	1	COG0674|COG1013|COG1014|COG1143	Pyruvate:ferredoxin oxidoreductase or related 2-oxoacid:ferredoxin oxidoreductase, alpha subunit (PorA) (PDB:5C4I)|Pyruvate:ferredoxin oxidoreductase or related 2-oxoacid:ferredoxin oxidoreductase, beta subunit (PorB) (PDB:1B0P)|Pyruvate:ferredoxin oxidoreductase or related 2-oxoacid:ferredoxin oxidoreductase, gamma subunit (PorG) (PDB:1B0P)|Formate hydrogenlyase subunit 6/NADH:ubiquinone oxidore…	COG0674|COG1013|COG1014|COG1143	Pyruvate oxidation|Pyruvate oxidation|Pyruvate oxidation|NADH dehydrogenase	C|C|C|C	Energy production and conversion|Energy production and conversion|Energy production and conversion|Energy production and conversion	MTKQKKFITCDGNQAAAHISYMFSEVAAIYPITPSSTMAEYVDEWAAAGRKNIFGETVLVQEMQSEGGAAGAVHGSLQAGALTTTYTASQGLLLMIPNMYKIAGEFLPCVFHVSARTLASHALCIFGDHQDVMSCRQTGFAMLCEGSVQEVMDMAAVAHLATIKSRVPFVNFFDGFRTSHEIQKIEMLENEDLAGLIDQQALAEFRQRALNPNNPVARGMAENPDHFFQHRESCNNFYEAVPAIVEEYMNEISKITGRPHGLFDYYGAEDAERVIIAMGSVTEAAREAIDYLMSKGEKVGLVSVHLYRPFSAKHFLAAVPKTAKTIAVLDRTKEPGANGEPLYLDVKDCFYGTENAPVIVGGRYGLGSKDTTPAQIIAVFKNLALPMPKNHFTVGIVDD…
4916	GC_00000742		PV29FA01	1761	5	5	1	1	1	1	1	COG0674|COG1013|COG1014|COG1143	Pyruvate:ferredoxin oxidoreductase or related 2-oxoacid:ferredoxin oxidoreductase, alpha subunit (PorA) (PDB:5C4I)|Pyruvate:ferredoxin oxidoreductase or related 2-oxoacid:ferredoxin oxidoreductase, beta subunit (PorB) (PDB:1B0P)|Pyruvate:ferredoxin oxidoreductase or related 2-oxoacid:ferredoxin oxidoreductase, gamma subunit (PorG) (PDB:1B0P)|Formate hydrogenlyase subunit 6/NADH:ubiquinone oxidore…	COG0674|COG1013|COG1014|COG1143	Pyruvate oxidation|Pyruvate oxidation|Pyruvate oxidation|NADH dehydrogenase	C|C|C|C	Energy production and conversion|Energy production and conversion|Energy production and conversion|Energy production and conversion	MTKQKKFITCDGNQAAAHISYMFSEVAAIYPITPSSTMAEYVDEWAAAGRKNIFGETVLVQEMQSEGGAAGAVHGSLQAGALTTTYTASQGLLLMIPNMYKIAGEFLPCVFHVSARTLASHALCIFGDHQDVMSCRQTGFAMLCEGSVQEVMDMAAVAHLATIKSRVPFVNFFDGFRTSHEIQKIEMLENEDLAGLIDQQALAEFRQRALNPNNPVARGMAENPDHFFQHRESCNNFYEAVPAIVEEYMNEISKITGRPHGLFDYYGAEDAERVIIAMGSVTEAAREAIDYLMSKGEKVGLVSVHLYRPFSAKHFLAAVPKTAKTIAVLDRTKEPGANGEPLYLDVKDCFYGTENAPVIVGGRYGLGSKDTTPAQIIAVFKNLALPMPKNHFTVGIVDD…
4917	GC_00000742		PV2SA01	2020	5	5	1	1	1	1	1	COG0674|COG1013|COG1014|COG1143	Pyruvate:ferredoxin oxidoreductase or related 2-oxoacid:ferredoxin oxidoreductase, alpha subunit (PorA) (PDB:5C4I)|Pyruvate:ferredoxin oxidoreductase or related 2-oxoacid:ferredoxin oxidoreductase, beta subunit (PorB) (PDB:1B0P)|Pyruvate:ferredoxin oxidoreductase or related 2-oxoacid:ferredoxin oxidoreductase, gamma subunit (PorG) (PDB:1B0P)|Formate hydrogenlyase subunit 6/NADH:ubiquinone oxidore…	COG0674|COG1013|COG1014|COG1143	Pyruvate oxidation|Pyruvate oxidation|Pyruvate oxidation|NADH dehydrogenase	C|C|C|C	Energy production and conversion|Energy production and conversion|Energy production and conversion|Energy production and conversion	MTKQKKFITCDGNQAAAHISYMFSEVAAIYPITPSSTMAEYVDEWAAAGRKNIFGETVLVQEMQSEGGAAGAVHGSLQAGALTTTYTASQGLLLMIPNMYKIAGEFLPCVFHVSARTLASHALCIFGDHQDVMSCRQTGFAMLCEGSVQEVMDMAAVAHLATIKSRVPFVNFFDGFRTSHEIQKIEMLENEDLAGLIDQQALAEFRQRALNPNNPVARGMAENPDHFFQHRESCNNFYEAVPAIVEEYMNEISKITGRPHGLFDYYGAEDAERVIIAMGSVTEAAREAIDYLMSKGEKVGLVSVHLYRPFSAKHFLAAVPKTAKTIAVLDRTKEPGANGEPLYLDVKDCFYGTENAPVIVGGRYGLGSKDTTPAQIIAVFKNLALPMPKNHFTVGIVDD…
4918	GC_00000742		PV2SA02	2695	5	5	1	1	1	1	1	COG0674|COG1013|COG1014|COG1143	Pyruvate:ferredoxin oxidoreductase or related 2-oxoacid:ferredoxin oxidoreductase, alpha subunit (PorA) (PDB:5C4I)|Pyruvate:ferredoxin oxidoreductase or related 2-oxoacid:ferredoxin oxidoreductase, beta subunit (PorB) (PDB:1B0P)|Pyruvate:ferredoxin oxidoreductase or related 2-oxoacid:ferredoxin oxidoreductase, gamma subunit (PorG) (PDB:1B0P)|Formate hydrogenlyase subunit 6/NADH:ubiquinone oxidore…	COG0674|COG1013|COG1014|COG1143	Pyruvate oxidation|Pyruvate oxidation|Pyruvate oxidation|NADH dehydrogenase	C|C|C|C	Energy production and conversion|Energy production and conversion|Energy production and conversion|Energy production and conversion	MTKQKKFITCDGNQAAAHISYMFSEVAAIYPITPSSTMAEYVDEWAAAGRKNIFGETVLVQEMQSEGGAAGAVHGSLQAGALTTTYTASQGLLLMIPNMYKIAGEFLPCVFHVSARTLASHALCIFGDHQDVMSCRQTGFAMLCEGSVQEVMDMAAVAHLATIKSRVPFVNFFDGFRTSHEIQKIEMLENEDLAGLIDQQALAEFRQRALNPNNPVARGMAENPDHFFQHRESCNNFYEAVPAIVEEYMNEISKITGRPHGLFDYYGAEDAERVIIAMGSVTEAAREAIDYLMSKGEKVGLVSVHLYRPFSAKHFLAAVPKTAKTIAVLDRTKEPGANGEPLYLDVKDCFYGTENAPVIVGGRYGLGSKDTTPAQIIAVFKNLALPMPKNHFTVGIVDD…
5504	GC_00000860		PV10SA01	3503	5	5	1	1	1	1	1	COG0473	Isocitrate/isopropylmalate dehydrogenase (LeuB) (PDB:1GC9)	COG0473	TCA cycle	C|E	Energy production and conversion|Amino acid transport and metabolism	MDFKIAVLAGDGIGPEISVQGVDVMNAVCEKFGHKVSYEYAICGADAIDKVGDPFPEATFQACKNADAVLFSAVGDPKFDNDPTAKVRPEQGLLAMRKKLGLFANIRPVQTFKCLVHKSPLRAELVENADFICIRELTGGMYFGEKYQDNDKAYDTNMYTRPEIERILKVAFEYAMKRRKHLTVVDKANVLASSRLWRQIAQEMAPQYPEVTTDYMFVDNAAMKMLQDPCFFDVMVTENTFGDILTDEGSVISGSMGLLPSASTGESTPVFEPIHGSWPQAKGLNIANPLAQILSVAMLFEYFDLKEEGTLIRKAVDASLDENVRTPEIQVEGGAKYGTKEVGSWIVDYIKKA
5505	GC_00000860		PV26FA01	2667	5	5	1	1	1	1	1	COG0473	Isocitrate/isopropylmalate dehydrogenase (LeuB) (PDB:1GC9)	COG0473	TCA cycle	C|E	Energy production and conversion|Amino acid transport and metabolism	MDFKIAVLAGDGIGPEISVQGVDVMNAVCEKFGHKVSYEYAICGADAIDKVGDPFPEATFQACKNADAVLFSAVGDPKFDNDPTAKVRPEQGLLAMRKKLGLFANIRPVQTFKCLVHKSPLRAELVENADFICIRELTGGMYFGEKYQDNDKAYDTNMYTRPEIERILKVAFEYAMKRRKHLTVVDKANVLASSRLWRQIAQEMAPQYPEVTTDYMFVDNAAMKMLQDPCFFDVMVTENTFGDILTDEGSVISGSMGLLPSASTGESTPVFEPIHGSWPQAKGLNIANPLAQILSVAMLFEYFDLKEEGTLIRKAVDASLDENVRTPEIQVEGGAKYGTKEVGSWIVDYIKKA
5506	GC_00000860		PV29FA01	4376	5	5	1	1	1	1	1	COG0473	Isocitrate/isopropylmalate dehydrogenase (LeuB) (PDB:1GC9)	COG0473	TCA cycle	C|E	Energy production and conversion|Amino acid transport and metabolism	MDFKIAVLAGDGIGPEISVQGVDVMNAVCEKFGHKVSYEYAICGADAIDKVGDPFPEATFQACKNADAVLFSAVGDPKFDNDPTAKVRPEQGLLAMRKKLGLFANIRPVQTFKCLVHKSPLRAELVENADFICIRELTGGMYFGEKYQDNDKAYDTNMYTRPEIERILKVAFEYAMKRRKHLTVVDKANVLASSRLWRQIAQEMAPQYPEVTTDYMFVDNAAMKMLQDPCFFDVMVTENTFGDILTDEGSVISGSMGLLPSASTGESTPVFEPIHGSWPQAKGLNIANPLAQILSVAMLFEYFDLKEEGTLIRKAVDASLDENVRTPEIQVEGGAKYGTKEVGSWIVDYIKKA
5507	GC_00000860		PV2SA01	2883	5	5	1	1	1	1	1	COG0473	Isocitrate/isopropylmalate dehydrogenase (LeuB) (PDB:1GC9)	COG0473	TCA cycle	C|E	Energy production and conversion|Amino acid transport and metabolism	MDFKIAVLAGDGIGPEISVQGVDVMNAVCEKFGHKVSYEYAICGADAIDKVGDPFPEATFQACKNADAVLFSAVGDPKFDNDPTAKVRPEQGLLAMRKKLGLFANIRPVQTFKCLVHKSPLRAELVENADFICIRELTGGMYFGEKYQDNDKAYDTNMYTRPEIERILKVAFEYAMKRRKHLTVVDKANVLASSRLWRQIAQEMAPQYPEVTTDYMFVDNAAMKMLQDPCFFDVMVTENTFGDILTDEGSVISGSMGLLPSASTGESTPVFEPIHGSWPQAKGLNIANPLAQILSVAMLFEYFDLKEEGTLIRKAVDASLDENVRTPEIQVEGGAKYGTKEVGSWIVDYIKKA
5508	GC_00000860		PV2SA02	3558	5	5	1	1	1	1	1	COG0473	Isocitrate/isopropylmalate dehydrogenase (LeuB) (PDB:1GC9)	COG0473	TCA cycle	C|E	Energy production and conversion|Amino acid transport and metabolism	MDFKIAVLAGDGIGPEISVQGVDVMNAVCEKFGHKVSYEYAICGADAIDKVGDPFPEATFQACKNADAVLFSAVGDPKFDNDPTAKVRPEQGLLAMRKKLGLFANIRPVQTFKCLVHKSPLRAELVENADFICIRELTGGMYFGEKYQDNDKAYDTNMYTRPEIERILKVAFEYAMKRRKHLTVVDKANVLASSRLWRQIAQEMAPQYPEVTTDYMFVDNAAMKMLQDPCFFDVMVTENTFGDILTDEGSVISGSMGLLPSASTGESTPVFEPIHGSWPQAKGLNIANPLAQILSVAMLFEYFDLKEEGTLIRKAVDASLDENVRTPEIQVEGGAKYGTKEVGSWIVDYIKKA
11124	GC_00001986		PV10SA01	1238	5	5	1	1	0.997479	1	0.998738	COG1966	Carbon starvation protein CstA (peptide/pyruvate transporter) (CstA) (PUBMED:26497384;29358499)			C|E	Energy production and conversion|Amino acid transport and metabolism	MITFIIALLVLVGGYFLYGSYVERVFGPDKIRKTPALTMADGVDFIPLPTWKIFMIQFLNIAGLGPIFGAIMGAKFGTASYLWIVLGTIFAGAVHDYLSGMLSIRHDGESLPEIIGRYLGLPTKQLMRGFTVVLMILVGAVFVAGPAGLLAKLTPEYMDVTFWIIVVFVYYMLATLLPVDKIIGKIYPLFAIALLFMAVGILVMLLWNHPALPEITDGLHNTHPAGLPIFPIMFVSIACGAISGFHATQSPLMARCMKNEKYGRPIFYGAMVTEGIVALIWAAAATCFFHQNGMEESNASIIVDSITKEWLGTIGGLLAVLGVIAAPITSGDTALRSARLIVADFMHLEQKSIAKRLLICIPIFAVTIGILLYSQRDAAGFDMIWRYFAWCNQALSVFT…
11125	GC_00001986		PV26FA01	781	5	5	1	1	0.997479	1	0.998738	COG1966	Carbon starvation protein CstA (peptide/pyruvate transporter) (CstA) (PUBMED:26497384;29358499)			C|E	Energy production and conversion|Amino acid transport and metabolism	MITFIIALLVLVGGYFLYGSYVERVFGPDKIRKTPALTMADGVDFIPLPTWKIFMIQFLNIAGLGPIFGAIMGAKFGTASYLWIVLGTIFAGAVHDYLSGMLSIRHDGESLPEIIGRYLGLPTKQLMRGFTVVLMILVGAVFVAGPAGLLAKLTPEYMDVTFWIIVVFVYYMLATLLPVDKIIGKIYPLFAIALLFMAVGILVMLLWNHPALPEITDGLHNTHPAGLPIFPIMFVSIACGAISGFHATQSPLMARCMKNEKYGRPIFYGAMVTEGIVALIWAAAATCFFHQNGMEESNASIIVDSITKEWLGTIGGLLAVLGVIAAPITSGDTALRSARLIVADFMHLEQKSIAKRLLICIPIFAVTIGILLYSQRDAAGFDMIWRYFAWCNQALSVFT…
11126	GC_00001986		PV29FA01	2438	5	5	1	1	0.997479	1	0.998738	COG1966	Carbon starvation protein CstA (peptide/pyruvate transporter) (CstA) (PUBMED:26497384;29358499)			C|E	Energy production and conversion|Amino acid transport and metabolism	MITFIIALLVLVGGYFLYGSYVERVFGPDKIRKTPALTMADGVDFIPLPTWKIFMIQFLNIAGLGPIFGAIMGAKFGTASYLWIVLGTIFAGAVHDYLSGMLSIRHDGESLPEIIGRYLGLPTKQLMRGFTVVLMILVGAVFVAGPAGLLAKLTPEYMDVTFWIIVVFVYYMLATLLPVDKIIGKIYPLFAIALLFMAVGILVMLLWNHPALPEITDGLHNTHPAGLPIFPIMFVSIACGAISGFHATQSPLMARCMKNEKYGRPIFYGAMVTEGIVALIWAAAATCFFHQNGMEESNASIIVDSITKEWLGTIGGLLAVLGVIAAPITSGDTALRSARLIVADFMHLEQKSIAKRLLICIPIFAVTIGILLYSQRDAAGFDMIWRYFAWCNQALSVFT…
11127	GC_00001986		PV2SA01	543	5	5	1	1	0.997479	1	0.998738	COG1966	Carbon starvation protein CstA (peptide/pyruvate transporter) (CstA) (PUBMED:26497384;29358499)			C|E	Energy production and conversion|Amino acid transport and metabolism	MITFIIALLVLVGGYFLYGSYVERVFGPDKTRKTPALTMADGVDFIPLPTWKIFMIQFLNIAGLGPIFGAIMGAKFGTASYLWIVLGTIFAGAVHDYLSGMLSIRHDGESLPEIIGRYLGLPTKQLMRGFTVVLMILVGAVFVAGPAGLLAKLTPEYMDVTFWIIVVFVYYMLATLLPVDKIIGKIYPLFAIALLFMAVGILVMLLWNHPALPEITDGLHNTHPAGLPIFPIMFVSIACGAISGFHATQSPLMARCMKNEKYGRPIFYGAMVTEGIVALIWAAAATCFFHQNGMEESNASIIVDSITKEWLGTIGGLLAVLGVIAAPITSGDTALRSARLIVADFMHLEQKSIAKRLLICIPIFAVTIGILLYSQRDATGFDMIWRYFAWCNQALSVFT…
11128	GC_00001986		PV2SA02	1218	5	5	1	1	0.997479	1	0.998738	COG1966	Carbon starvation protein CstA (peptide/pyruvate transporter) (CstA) (PUBMED:26497384;29358499)			C|E	Energy production and conversion|Amino acid transport and metabolism	MITFIIALLVLVGGYFLYGSYVERVFGPDKTRKTPALTMADGVDFIPLPTWKIFMIQFLNIAGLGPIFGAIMGAKFGTASYLWIVLGTIFAGAVHDYLSGMLSIRHDGESLPEIIGRYLGLPTKQLMRGFTVVLMILVGAVFVAGPAGLLAKLTPEYMDVTFWIIVVFVYYMLATLLPVDKIIGKIYPLFAIALLFMAVGILVMLLWNHPALPEITDGLHNTHPAGLPIFPIMFVSIACGAISGFHATQSPLMARCMKNEKYGRPIFYGAMVTEGIVALIWAAAATCFFHQNGMEESNASIIVDSITKEWLGTIGGLLAVLGVIAAPITSGDTALRSARLIVADFMHLEQKSIAKRLLICIPIFAVTIGILLYSQRDATGFDMIWRYFAWCNQALSVFT…
4144	GC_00000588		PV10SA01	1257	5	5	1	1	1	1	1	COG1052	Lactate dehydrogenase or related 2-hydroxyacid dehydrogenase (LdhA) (PDB:1DXY)	COG1052	Pyridoxal phosphate biosynthesis	C|H|R	Energy production and conversion|Coenzyme transport and metabolism|General function prediction only	MFQKLVAIEPVSLVLSAEKALYSFADEVVMYSDIPAGDNEIIARIGDADAVLLSYTSQINRYILERCPNVRYIGMCCSLYSPESANVDIRYANERGITVTGIRDYGDEGVIEYVVSELVRCLHGFGQKPWEGIPREITGLKVGIVGLGKSGGMIADAMKFFGADIAYYARSEKKEAGAKGYRFMPLNELLTWSEVVCCCLNKNTVLLHEAEFKALGNRKILFNTGLSPAWDESSFTRWLEEDNLCFCDTLGALGSTALLTHPHVRCMQVSTGRTRQAFDRLSEKVLANLSEYNG
4145	GC_00000588		PV26FA01	765	5	5	1	1	1	1	1	COG1052	Lactate dehydrogenase or related 2-hydroxyacid dehydrogenase (LdhA) (PDB:1DXY)	COG1052	Pyridoxal phosphate biosynthesis	C|H|R	Energy production and conversion|Coenzyme transport and metabolism|General function prediction only	MFQKLVAIEPVSLVLSAEKALYSFADEVVMYSDIPAGDNEIIARIGDADAVLLSYTSQINRYILERCPNVRYIGMCCSLYSPESANVDIRYANERGITVTGIRDYGDEGVIEYVVSELVRCLHGFGQKPWEGIPREITGLKVGIVGLGKSGGMIADAMKFFGADIAYYARSEKKEAGAKGYRFMPLNELLTWSEVVCCCLNKNTVLLHEAEFKALGNRKILFNTGLSPAWDESSFTRWLEEDNLCFCDTLGALGSTALLTHPHVRCMQVSTGRTRQAFDRLSEKVLANLSEYNG
4146	GC_00000588		PV29FA01	2422	5	5	1	1	1	1	1	COG1052	Lactate dehydrogenase or related 2-hydroxyacid dehydrogenase (LdhA) (PDB:1DXY)	COG1052	Pyridoxal phosphate biosynthesis	C|H|R	Energy production and conversion|Coenzyme transport and metabolism|General function prediction only	MFQKLVAIEPVSLVLSAEKALYSFADEVVMYSDIPAGDNEIIARIGDADAVLLSYTSQINRYILERCPNVRYIGMCCSLYSPESANVDIRYANERGITVTGIRDYGDEGVIEYVVSELVRCLHGFGQKPWEGIPREITGLKVGIVGLGKSGGMIADAMKFFGADIAYYARSEKKEAGAKGYRFMPLNELLTWSEVVCCCLNKNTVLLHEAEFKALGNRKILFNTGLSPAWDESSFTRWLEEDNLCFCDTLGALGSTALLTHPHVRCMQVSTGRTRQAFDRLSEKVLANLSEYNG
4147	GC_00000588		PV2SA01	559	5	5	1	1	1	1	1	COG1052	Lactate dehydrogenase or related 2-hydroxyacid dehydrogenase (LdhA) (PDB:1DXY)	COG1052	Pyridoxal phosphate biosynthesis	C|H|R	Energy production and conversion|Coenzyme transport and metabolism|General function prediction only	MFQKLVAIEPVSLVLSAEKALYSFADEVVMYSDIPAGDNEIIARIGDADAVLLSYTSQINRYILERCPNVRYIGMCCSLYSPESANVDIRYANERGITVTGIRDYGDEGVIEYVVSELVRCLHGFGQKPWEGIPREITGLKVGIVGLGKSGGMIADAMKFFGADIAYYARSEKKEAGAKGYRFMPLNELLTWSEVVCCCLNKNTVLLHEAEFKALGNRKILFNTGLSPAWDESSFTRWLEEDNLCFCDTLGALGSTALLTHPHVRCMQVSTGRTRQAFDRLSEKVLANLSEYNG
4148	GC_00000588		PV2SA02	1234	5	5	1	1	1	1	1	COG1052	Lactate dehydrogenase or related 2-hydroxyacid dehydrogenase (LdhA) (PDB:1DXY)	COG1052	Pyridoxal phosphate biosynthesis	C|H|R	Energy production and conversion|Coenzyme transport and metabolism|General function prediction only	MFQKLVAIEPVSLVLSAEKALYSFADEVVMYSDIPAGDNEIIARIGDADAVLLSYTSQINRYILERCPNVRYIGMCCSLYSPESANVDIRYANERGITVTGIRDYGDEGVIEYVVSELVRCLHGFGQKPWEGIPREITGLKVGIVGLGKSGGMIADAMKFFGADIAYYARSEKKEAGAKGYRFMPLNELLTWSEVVCCCLNKNTVLLHEAEFKALGNRKILFNTGLSPAWDESSFTRWLEEDNLCFCDTLGALGSTALLTHPHVRCMQVSTGRTRQAFDRLSEKVLANLSEYNG
8004	GC_00001362		PV10SA01	3113	5	5	1	1	0.998806	1	0.999403	COG1052	Lactate dehydrogenase or related 2-hydroxyacid dehydrogenase (LdhA) (PDB:1DXY)	COG1052	Pyridoxal phosphate biosynthesis	C|H|R	Energy production and conversion|Coenzyme transport and metabolism|General function prediction only	MAYKIAFYDTKPYDERSFTEANEKFGFDIRYYKGHLNMNNVVLTKGVDVVCIFVNDTADAEVIRAMADNGVKLLALRCAGYNNVDLAATAGKMKVVRVPAYSPYAVAEFTVALMLSLNRKIPRATMRTRDGNFSLHGLMGFDMHGKTAGIIGTGKIAKILIQILRGFGMNVLAYDLYPDYNFAREHQVVYCTLDELYHSSDIISLHCPLTEQTKYLINDYSISKMKDGVMIINTGRGQLIHTNALIEGLKTKKVGYAGLDVYEEEEPYFYEDKSDKIIDDDTLARLLSFNNVIVTSHQAFFTKEAMTNIAHTTLQNVKDFAESRSLVNEVAVGRV
8005	GC_00001362		PV26FA01	3132	5	5	1	1	0.998806	1	0.999403	COG1052	Lactate dehydrogenase or related 2-hydroxyacid dehydrogenase (LdhA) (PDB:1DXY)	COG1052	Pyridoxal phosphate biosynthesis	C|H|R	Energy production and conversion|Coenzyme transport and metabolism|General function prediction only	MAYKIAFYDTKPYDERSFTEANEKFGFDIRYYKGHLNMNNVVLTKGVDVVCIFVNDTADAEVIRAMADNGVKLLALRCAGYNNVDLAATAGKMKVVRVPAYSPYAVAEFTVALMLSLNRKIPRATMRTRDGNFSLHGLMGFDMHGKTAGIIGTGKIAKILIQILRGFGMNVLAYDLYPDYNFAREHQVVYCTLDELYHSSDIISLHCPLTEQTKYLINDYSISKMKDGVMIINTGRGQLIHTNALIEGLKTKKVGYAGLDVYEEEEPYFYEDKSDKIIDDDTLARLLSFNNVIVTSHQAFFTKEAMTNIAHTTLQNVKDFAESRSLVNEVAVGRV
8006	GC_00001362		PV29FA01	320	5	5	1	1	0.998806	1	0.999403	COG1052	Lactate dehydrogenase or related 2-hydroxyacid dehydrogenase (LdhA) (PDB:1DXY)	COG1052	Pyridoxal phosphate biosynthesis	C|H|R	Energy production and conversion|Coenzyme transport and metabolism|General function prediction only	MAYKIAFYDTKPYDERSFTEANEKFGFDIRYYKGHLNMNNVVLTKGVDVVCIFVNDTADAEVIRAMADNGVKLLALRCAGYNNVDLAATAGKMKVVRVPAYSPYAVAEFTVALMLSLNRKIPRATMRTRDGNFSLHGLMGFDMHGKTAGIIGTGKIAKILIQILRGFGMNVLAYDLYPDYNFAREHQVVYCTLDELYHSSDIISLHCPLTEQTKYLINDYSISKMKDGVMIINTGRGQLIHTNALIEGLKTKKVGYAGLDVYEEEEPYFYEDKSDKIIDDDTLARLLSFNNVIVTSHQAFFTKEAMTNIAHTTLQNVKDFAESRFLVNEVAVGRV
8007	GC_00001362		PV2SA01	2281	5	5	1	1	0.998806	1	0.999403	COG1052	Lactate dehydrogenase or related 2-hydroxyacid dehydrogenase (LdhA) (PDB:1DXY)	COG1052	Pyridoxal phosphate biosynthesis	C|H|R	Energy production and conversion|Coenzyme transport and metabolism|General function prediction only	MAYKIAFYDTKPYDERSFTEANEKFGFDIRYYKGHLNMNNVVLTKGVDVVCIFVNDTADAEVIRAMADNGVKLLALRCAGYNNVDLAATAGKMKVVRVPAYSPYAVAEFTVALMLSLNRKIPRATMRTRDGNFSLHGLMGFDMHGKTAGIIGTGKIAKILIQILRGFGMNVLAYDLYPDYNFAREHQVVYCTLDELYHSSDIISLHCPLTEQTKYLINDYSISKMKDGVMIINTGRGQLIHTNALIEGLKTKKVGYAGLDVYEEEEPYFYEDKSDKIIDDDTLARLLSFNNVIVTSHQAFFTKEAMTNIAHTTLQNVKDFAESRSLVNEVAVGRV
8008	GC_00001362		PV2SA02	2956	5	5	1	1	0.998806	1	0.999403	COG1052	Lactate dehydrogenase or related 2-hydroxyacid dehydrogenase (LdhA) (PDB:1DXY)	COG1052	Pyridoxal phosphate biosynthesis	C|H|R	Energy production and conversion|Coenzyme transport and metabolism|General function prediction only	MAYKIAFYDTKPYDERSFTEANEKFGFDIRYYKGHLNMNNVVLTKGVDVVCIFVNDTADAEVIRAMADNGVKLLALRCAGYNNVDLAATAGKMKVVRVPAYSPYAVAEFTVALMLSLNRKIPRATMRTRDGNFSLHGLMGFDMHGKTAGIIGTGKIAKILIQILRGFGMNVLAYDLYPDYNFAREHQVVYCTLDELYHSSDIISLHCPLTEQTKYLINDYSISKMKDGVMIINTGRGQLIHTNALIEGLKTKKVGYAGLDVYEEEEPYFYEDKSDKIIDDDTLARLLSFNNVIVTSHQAFFTKEAMTNIAHTTLQNVKDFAESRSLVNEVAVGRV
12324	GC_00002226		PV10SA01	1579	5	5	1	1	0.996436	1	0.998215	COG1052	Lactate dehydrogenase or related 2-hydroxyacid dehydrogenase (LdhA) (PDB:1DXY)	COG1052	Pyridoxal phosphate biosynthesis	C|H|R	Energy production and conversion|Coenzyme transport and metabolism|General function prediction only	MKIVVLDGYGLNPGDLSWEEMRALGELTVYDRTAPAELLERSAGAEVLITNKTVITAEDMAALPALKYIGVLATGYNIVDIQAAKARGIIVTNIPAYSTASVAQMVFAHILNITQRVGHYAYANRHGRWADNPDFCYWDTDLVELDGKKLGIIGLGNTGQATARIAAAFGMQVCAYTSKPQSQLPGGIRKMELDELFRECDVVSLHCPLTPDTKELVNAARLALMKPTAILINTGRGPLVNEKNLADALNKGVIAAAGLDVLSSEPPQYTNPLLTAKNCFITPHIAWATKEARVRLMRIAVGNLKGFIKGEIVNNVAE
12325	GC_00002226		PV26FA01	454	5	5	1	1	0.996436	1	0.998215	COG1052	Lactate dehydrogenase or related 2-hydroxyacid dehydrogenase (LdhA) (PDB:1DXY)	COG1052	Pyridoxal phosphate biosynthesis	C|H|R	Energy production and conversion|Coenzyme transport and metabolism|General function prediction only	MKIVVLDGYGLNPGDLSWEEMRALGELTVYDRTAPAELLERSAGAEVLITNKTVITAEDMVALPALKYIGVLATGYNIVDIQAAKARGIIVTNIPAYSTASVAQMVFAHILNITQRVGHYAYANRHGRWADNPDFCYWDTDLVELDGKKLGIIGLGNTGQATARIAAAFGMQVCAYTSKPQSQLPGGIRKMELDELFRECDVVSLHCPLTPDTKELVNAARLALMKPTAILINTGRGPLVNEKDLADALNKGVIAAAGLDVLSSEPPQYTNPLLTAKNCFITPHIAWATKEARVRLMRIAVGNLKGFIKGEIVNNVAE
12326	GC_00002226		PV29FA01	1948	5	5	1	1	0.996436	1	0.998215	COG1052	Lactate dehydrogenase or related 2-hydroxyacid dehydrogenase (LdhA) (PDB:1DXY)	COG1052	Pyridoxal phosphate biosynthesis	C|H|R	Energy production and conversion|Coenzyme transport and metabolism|General function prediction only	MKIVVLDGYGLNPGDLSWEEMRALGELTVYDRTAPAELLERSAGAEVLITNKTVITAEDMAALPALKYIGVLATGYNIVDIQAAKARGIIVTNIPAYSTASVAQMVFAHILNITQRVGHYAYANRHGRWADNPDFCYWDTDLVELDGKKLGIIGLGNTGQATARIAAAFGMQVCAYTSKPQSQLPGGIRKMELDELFRECDVVSLHCPLTPDTKELVNAARLALMKPTAILINTGRGPLVNEKDLADALNKGVIAAAGLDVLSSEPPQYTNPLLTAKNCFITPHIAWATKEARVRLMRIAVGNLKGFIKGEIVNNVAE
12327	GC_00002226		PV2SA01	971	5	5	1	1	0.996436	1	0.998215	COG1052	Lactate dehydrogenase or related 2-hydroxyacid dehydrogenase (LdhA) (PDB:1DXY)	COG1052	Pyridoxal phosphate biosynthesis	C|H|R	Energy production and conversion|Coenzyme transport and metabolism|General function prediction only	MKIVVLDGYGLNPGDLSWEEMRALGELTVYDRTAPAELLERSAGAEVLITNKTVITAEDMAALPALKYIGVLATGYNIVDIQAAKARGIIVTNIPAYSTASVAQMVFAHILNITQRVGHYAYANRHGRWANNPDFCYWDTDLVELDGKKLGIIGLGNTGQATARIAAAFGMQVCAYTSKPQSQLPGGIRKMELDELFRECDVVSLHCPLTPDTKELVNAARLALMKPTAILINTGRGPLVNEKDLADALNKGVIAAAGLDVLSSEPPQYTNPLLTAKNCFITPHIAWATKEARVRLMRIAVGNLKGFIKGEIVNNVAE
12328	GC_00002226		PV2SA02	1646	5	5	1	1	0.996436	1	0.998215	COG1052	Lactate dehydrogenase or related 2-hydroxyacid dehydrogenase (LdhA) (PDB:1DXY)	COG1052	Pyridoxal phosphate biosynthesis	C|H|R	Energy production and conversion|Coenzyme transport and metabolism|General function prediction only	MKIVVLDGYGLNPGDLSWEEMRALGELTVYDRTAPAELLERSAGAEVLITNKTVITAEDMAALPALKYIGVLATGYNIVDIQAAKARGIIVTNIPAYSTASVAQMVFAHILNITQRVGHYAYANRHGRWANNPDFCYWDTDLVELDGKKLGIIGLGNTGQATARIAAAFGMQVCAYTSKPQSQLPGGIRKMELDELFRECDVVSLHCPLTPDTKELVNAARLALMKPTAILINTGRGPLVNEKDLADALNKGVIAAAGLDVLSSEPPQYTNPLLTAKNCFITPHIAWATKEARVRLMRIAVGNLKGFIKGEIVNNVAE
8539	GC_00001469		PV10SA01	4204	5	5	1	1	0.997426	1	0.998711	COG0716|COG2221	Flavodoxin (FldA) (PDB:1AG9)|Dissimilatory sulfite reductase (desulfoviridin), alpha and beta subunits (DsrA)	COG0716|COG2221	Heme biosynthesis	C|P	Energy production and conversion|Inorganic ion transport and metabolism	MKTYTSNHIVFFSPTHTSAKIARAIGESIGMGRRIEIDLTTDENSSPIEIKDSITIIAVPVYAGRVAPIALQRLRRLKGNNAPAILVAVYGNRDYEDALVELRDETIQLGFTPLAAGAFIGEHSYSRPNMPIAEGRPDVTDLQIAEQFGKDCLTKLEKDETLSDFYLKGNIPYRFVGPSTPAAPVCTEECFACGECIEVCPTHAIALSDEGKIETEITKCIKCCACVKECPNGARVFDTPYTPMLHQKCAARREPELFI
8540	GC_00001469		PV26FA01	2033	5	5	1	1	0.997426	1	0.998711	COG0716|COG2221	Flavodoxin (FldA) (PDB:1AG9)|Dissimilatory sulfite reductase (desulfoviridin), alpha and beta subunits (DsrA)	COG0716|COG2221	Heme biosynthesis	C|P	Energy production and conversion|Inorganic ion transport and metabolism	MKTYTSNHIIFFSPTHTSAKIARAIGESIGMGRRIEIDLTTDENSSPIEIKDSITIIAVPVYAGRVAPIALQRLRRLKGNNAPAILVAVYGNRDYEDALVELRDETIQLGFTPLAAGAFIGEHSYSRPNMPIAEGRPDVTDLQIAEQFGKDCLTKLEKDETLSDFYLKGNIPYRFVGPSTPASPVCTEECFACGECIEVCPTHAIALSDEGKIETEITKCIKCCACVKECPNGARVFDTPYTPMLHQKCVARREPELFI
8541	GC_00001469		PV29FA01	3450	5	5	1	1	0.997426	1	0.998711	COG0716|COG2221	Flavodoxin (FldA) (PDB:1AG9)|Dissimilatory sulfite reductase (desulfoviridin), alpha and beta subunits (DsrA)	COG0716|COG2221	Heme biosynthesis	C|P	Energy production and conversion|Inorganic ion transport and metabolism	MKTYTSNHIVFFSPTHTSAKIARAIGESIGMGRRIEIDLTTDENSSPIEIKDSITIIAVPVYAGRVAPIALQRLRRLKGNNAPAILVAVYGNRDYEDALVELRDETIQLGFTPLAAGAFIGEHSYSRPNMPIAEGRPDVTDLQIAEQFGKDCLTKLEKDETLSDFYLKGNIPYRFVGPSTPAAPVCTEECFACGECIEVCPTHAIALSDEGKIETEITKCIKCCACVKECPNGARVFDTPYTPMLHQKCAARREPELFI
8542	GC_00001469		PV2SA01	4136	5	5	1	1	0.997426	1	0.998711	COG0716|COG2221	Flavodoxin (FldA) (PDB:1AG9)|Dissimilatory sulfite reductase (desulfoviridin), alpha and beta subunits (DsrA)	COG0716|COG2221	Heme biosynthesis	C|P	Energy production and conversion|Inorganic ion transport and metabolism	MKTYTSNHIVFFSPTHTSAKIARAIGESIGMGRRIEIDLTTDENSSPIEIKDSITIIAVPVYAGRVAPIALQRLRRLKGNNAPAILVAVYGNRDYEDALVELRDETIQLGFTPLAAGAFIGEHSYSRPNMPIAEGRPDVTDLQIAEQFGKDCLTKLEKDETLSDFYLKGNIPYRFVGPSTPAAPVCTEECFACGECIEVCPTHAIALSDEGKIETEITKCIKCCACVKECPNGARVFDTPYTPMLHQKCAARREPELFI
8543	GC_00001469		PV2SA02	147	5	5	1	1	0.997426	1	0.998711	COG0716|COG2221	Flavodoxin (FldA) (PDB:1AG9)|Dissimilatory sulfite reductase (desulfoviridin), alpha and beta subunits (DsrA)	COG0716|COG2221	Heme biosynthesis	C|P	Energy production and conversion|Inorganic ion transport and metabolism	MKTYTSNHIVFFSPTHTSAKIARAIGESIGMGRRIEIDLTTDENSSPIEIKDSITIIAVPVYAGRVAPIALQRLRRLKGNNAPAILVAVYGNRDYEDALVELRDETIQLGFTPLAAGAFIGEHSYSRPNMPIAEGRPDVTDLQIAEQFGKDCLTKLEKDETLSDFYLKGNIPYRFVGPSTPAAPVCTEECFACGECIEVCPTHAIALSDEGKIETEITKCIKCCACVKECPNGARVFDTPYTPMLHQKCAARREPELFI
1737	GC_00000131		PV10SA01	2199	5	7	2	0	0.951331	0.810868	0.875501	COG3263	NhaP-type Na+/H+ and K+/H+ antiporter with C-terminal TrkAC and CorC domains (NhaP2)			C|P	Energy production and conversion|Inorganic ion transport and metabolism	MKLYILIQQLLRRKFVQYFVLFFILISIIAVIASSFEEMATYKVLLFGITYVSSFIFLIEYTARIVSAPALYPGMKTAKARLKYTFSFYGFVDFVAVLPCVLTYAYWDTEVVHVIILPYIFIIFKLIRHSRSFRIIGMALASVREELETAYTASFITICFSAILMYYIERNAQPEVFKNIGDGIWWAIITFATVGYGDIYPITFLGKLLGCIICLVGVAMVAIPTGIISSSFINIVQKKEQREKFNKEEENR-
1738	GC_00000131		PV26FA01	3788	5	7	2	0	0.951331	0.810868	0.875501	COG3263	NhaP-type Na+/H+ and K+/H+ antiporter with C-terminal TrkAC and CorC domains (NhaP2)			C|P	Energy production and conversion|Inorganic ion transport and metabolism	MKLYILIQQLLRRKFVQYFVLFFILISIIAVIASSFEEMATYKVLLFGITYVSSFIFLIEYTARIVSAPALYPGMKTAKARLKYTFSFYGFVDFVAVLPCVLTYAYWDTEVVHVIILPYIFIIFKLIRHSRSFRIIGMALASVREELETAYTASFITICFSAILMYYIERNAQPEVFKNIGDGIWWAIITFATVGYGDIYPITFLGKLLGCIICLVGVAMVAIPTGIISSSFINIVQKKEQREKFNKEEENRR
1739	GC_00000131		PV29FA01	1193	5	7	2	0	0.951331	0.810868	0.875501	COG3263	NhaP-type Na+/H+ and K+/H+ antiporter with C-terminal TrkAC and CorC domains (NhaP2)			C|P	Energy production and conversion|Inorganic ion transport and metabolism	MKLYILIQQLLRRKFIQYFVLFFILISIIAVIASSFEEMATYKVLLFGITYVSSFIFLIEYTARIVSAPALYPGMKTAKARLKYTFSFYGFVDFVAVLPCVLTYAYWDTEVVHVIILPYIFIIFKLIRHSRSFRIIGMALASVREELETAYTASFITICFSAILMYYIERNAQPEVFKNIGDGIWWAIITFATVGYGDIYPITFLGKLLGCIICLVGVAMVAIPTGIISSSFINIVQKKEQREKFNKEEENRR
1740	GC_00000131		PV2SA01	1713	5	7	2	0	0.951331	0.810868	0.875501	COG3263	NhaP-type Na+/H+ and K+/H+ antiporter with C-terminal TrkAC and CorC domains (NhaP2)			C|P	Energy production and conversion|Inorganic ion transport and metabolism	MKLYILIQQLLRRKFIQYFVLFFILISIIAVIASSFEEMATYKVLLFGITYVSSFIFLIEYTARIVSAPALYPGMKTAKARLKYTFSFYGFVDFVAVLPCVLTYAYWDTEVVHVIILPYIFIIFKLIRHSRSFRIIGMALASVREELETAYTASFITICFSAILMYYIERNAQPEVFKNIGDGIWWAIITFATVGYGDIYPITFLGKLLGCIICLVGVAMVAIPTGIISSSFINIVQKKEQREKFNKEEENRR
1741	GC_00000131		PV2SA01	1729	5	7	2	0	0.951331	0.810868	0.875501	COG3263	NhaP-type Na+/H+ and K+/H+ antiporter with C-terminal TrkAC and CorC domains (NhaP2)			C|P	Energy production and conversion|Inorganic ion transport and metabolism	------------------------------------------------------------------------MGWRSTEVGL-------------------------------------------------NFRIIGMALASAREELETVYTASFITICFSAILMYYIERNAQPKVFKNIGDGIWWTIITFATVGYGDIYPITFLGELLGCIICLVGVTMVAIPTGIISSSFINIVQKKKQ--NLEKENDSQ-
1742	GC_00000131		PV2SA02	2388	5	7	2	0	0.951331	0.810868	0.875501	COG3263	NhaP-type Na+/H+ and K+/H+ antiporter with C-terminal TrkAC and CorC domains (NhaP2)			C|P	Energy production and conversion|Inorganic ion transport and metabolism	MKLYILIQQLLRRKFIQYFVLFFILISIIAVIASSFEEMATYKVLLFGITYVSSFIFLIEYTARIVSAPALYPGMKTAKARLKYTFSFYGFVDFVAVLPCVLTYAYWDTEVVHVIILPYIFIIFKLIRHSRSFRIIGMALASVREELETAYTASFITICFSAILMYYIERNAQPEVFKNIGDGIWWAIITFATVGYGDIYPITFLGKLLGCIICLVGVAMVAIPTGIISSSFINIVQKKEQREKFNKEEENRR
1743	GC_00000131		PV2SA02	2404	5	7	2	0	0.951331	0.810868	0.875501	COG3263	NhaP-type Na+/H+ and K+/H+ antiporter with C-terminal TrkAC and CorC domains (NhaP2)			C|P	Energy production and conversion|Inorganic ion transport and metabolism	------------------------------------------------------------------------MGWRSTEVGL-------------------------------------------------NFRIIGMALASAREELETVYTASFITICFSAILMYYIERNAQPKVFKNIGDGIWWTIITFATVGYGDIYPITFLGELLGCIICLVGVTMVAIPTGIISSSFINIVQKKKQ--NLEKENDSQ-
5139	GC_00000787		PV10SA01	2749	5	5	1	1	1	1	1	COG3263	NhaP-type Na+/H+ and K+/H+ antiporter with C-terminal TrkAC and CorC domains (NhaP2)			C|P	Energy production and conversion|Inorganic ion transport and metabolism	MIFNAENILLIGSILLFVSIVVSKTGYRFGIPTLLVFLLVGMLFGSDGLGLQFHDAGEAQFIGMMALSIILFSGGMDTKYSDIKPVLPQGILLSTFGVLLTTIFTGFFIYWISGFSNVSITMSLMTAMLLAATMSSTDSASVFNILRSQSMNLKHNLRPMLELESGSNDPMAYMLTIVLIQFITSAGMGADDILISFLIQFAVGGTSGFLLGKLAVAIINKIDLKNQSLYPILLLSFIFFTFTMTDLCKGNGYLAVYIAGMMVGNARIVNRKEIATFMSGMTWLFQIIMFLSLGLLVNPHEMLSIAIPATLIGIFMIVLARPLSVLLCLLPFKKMNINSRLFISWVGLRGAVPIIFATYPVVADVPGSTQIFNIVFFITILSLVVQGTTISWMAKLLHL…
5140	GC_00000787		PV26FA01	3429	5	5	1	1	1	1	1	COG3263	NhaP-type Na+/H+ and K+/H+ antiporter with C-terminal TrkAC and CorC domains (NhaP2)			C|P	Energy production and conversion|Inorganic ion transport and metabolism	MIFNAENILLIGSILLFVSIVVSKTGYRFGIPTLLVFLLVGMLFGSDGLGLQFHDAGEAQFIGMMALSIILFSGGMDTKYSDIKPVLPQGILLSTFGVLLTTIFTGFFIYWISGFSNVSITMSLMTAMLLAATMSSTDSASVFNILRSQSMNLKHNLRPMLELESGSNDPMAYMLTIVLIQFITSAGMGADDILISFLIQFAVGGTSGFLLGKLAVAIINKIDLKNQSLYPILLLSFIFFTFTMTDLCKGNGYLAVYIAGMMVGNARIVNRKEIATFMSGMTWLFQIIMFLSLGLLVNPHEMLSIAIPATLIGIFMIVLARPLSVLLCLLPFKKMNINSRLFISWVGLRGAVPIIFATYPVVADVPGSTQIFNIVFFITILSLVVQGTTISWMAKLLHL…
5141	GC_00000787		PV29FA01	730	5	5	1	1	1	1	1	COG3263	NhaP-type Na+/H+ and K+/H+ antiporter with C-terminal TrkAC and CorC domains (NhaP2)			C|P	Energy production and conversion|Inorganic ion transport and metabolism	MIFNAENILLIGSILLFVSIVVSKTGYRFGIPTLLVFLLVGMLFGSDGLGLQFHDAGEAQFIGMMALSIILFSGGMDTKYSDIKPVLPQGILLSTFGVLLTTIFTGFFIYWISGFSNVSITMSLMTAMLLAATMSSTDSASVFNILRSQSMNLKHNLRPMLELESGSNDPMAYMLTIVLIQFITSAGMGADDILISFLIQFAVGGTSGFLLGKLAVAIINKIDLKNQSLYPILLLSFIFFTFTMTDLCKGNGYLAVYIAGMMVGNARIVNRKEIATFMSGMTWLFQIIMFLSLGLLVNPHEMLSIAIPATLIGIFMIVLARPLSVLLCLLPFKKMNINSRLFISWVGLRGAVPIIFATYPVVADVPGSTQIFNIVFFITILSLVVQGTTISWMAKLLHL…
5142	GC_00000787		PV2SA01	1128	5	5	1	1	1	1	1	COG3263	NhaP-type Na+/H+ and K+/H+ antiporter with C-terminal TrkAC and CorC domains (NhaP2)			C|P	Energy production and conversion|Inorganic ion transport and metabolism	MIFNAENILLIGSILLFVSIVVSKTGYRFGIPTLLVFLLVGMLFGSDGLGLQFHDAGEAQFIGMMALSIILFSGGMDTKYSDIKPVLPQGILLSTFGVLLTTIFTGFFIYWISGFSNVSITMSLMTAMLLAATMSSTDSASVFNILRSQSMNLKHNLRPMLELESGSNDPMAYMLTIVLIQFITSAGMGADDILISFLIQFAVGGTSGFLLGKLAVAIINKIDLKNQSLYPILLLSFIFFTFTMTDLCKGNGYLAVYIAGMMVGNARIVNRKEIATFMSGMTWLFQIIMFLSLGLLVNPHEMLSIAIPATLIGIFMIVLARPLSVLLCLLPFKKMNINSRLFISWVGLRGAVPIIFATYPVVADVPGSTQIFNIVFFITILSLVVQGTTISWMAKLLHL…
5143	GC_00000787		PV2SA02	1803	5	5	1	1	1	1	1	COG3263	NhaP-type Na+/H+ and K+/H+ antiporter with C-terminal TrkAC and CorC domains (NhaP2)			C|P	Energy production and conversion|Inorganic ion transport and metabolism	MIFNAENILLIGSILLFVSIVVSKTGYRFGIPTLLVFLLVGMLFGSDGLGLQFHDAGEAQFIGMMALSIILFSGGMDTKYSDIKPVLPQGILLSTFGVLLTTIFTGFFIYWISGFSNVSITMSLMTAMLLAATMSSTDSASVFNILRSQSMNLKHNLRPMLELESGSNDPMAYMLTIVLIQFITSAGMGADDILISFLIQFAVGGTSGFLLGKLAVAIINKIDLKNQSLYPILLLSFIFFTFTMTDLCKGNGYLAVYIAGMMVGNARIVNRKEIATFMSGMTWLFQIIMFLSLGLLVNPHEMLSIAIPATLIGIFMIVLARPLSVLLCLLPFKKMNINSRLFISWVGLRGAVPIIFATYPVVADVPGSTQIFNIVFFITILSLVVQGTTISWMAKLLHL…
8014	GC_00001364		PV10SA01	1585	5	5	1	1	0.999701	1	0.999851	COG3004	Na+/H+ antiporter NhaA (NhaA) (PDB:1ZCD) (PUBMED:25746996)			C|P	Energy production and conversion|Inorganic ion transport and metabolism	MEKLKILNLNFSFQRAAHYHINGGMLLMGVVLLAMFLANSPWGDIYASFWNYEVHLQIGEFNFFSHNGHHMTLMTFINDALMAVFFFSVGLEIKREILVGELSSFRQALLPIVAACGGMLVPVLIYYFMTAGTPAQSGLAIPMATDIAFSLGVLSLFGKRVPLSLKVFLTAFAVVDDIGGILVIALFYTSHLSVNYLIASAGILLILCGGNFFRVHNRWFYIFWGVIMWYLFLQSGIHATIAGVVAAFTVPATPHYKIGKYINRIRENIAVFPASDKESVVLSKMQINVLKSIESSSDRVISPLQSLEDSLHGMVNYIILPLFAFANAGVSLTADHGGLEVGMATWAVLAGLLAGKFAGIYFFTWLVIKMGFAGLLKGMTWVNLTGICLLGGIGFTVSL…
8015	GC_00001364		PV26FA01	448	5	5	1	1	0.999701	1	0.999851	COG3004	Na+/H+ antiporter NhaA (NhaA) (PDB:1ZCD) (PUBMED:25746996)			C|P	Energy production and conversion|Inorganic ion transport and metabolism	MEKLKILNLNFSFQRAAHYHINGGMLLMGVVLLAMFLANSPWGDIYASFWNYEVHLQIGEFNFFSHNGHHMTLMTFINDALMAVFFFSVGLEIKREILVGELSSFRQALLPIVAACGGMLVPVLIYYFMTAGTPAQSGLAIPMATDIAFSLGVLSLFGKRVPLSLKVFLTAFAVVDDIGGILVIALFYTSHLSVNYLIASAGILLILCGGNFFRVRNRWFYIFWGVIMWYLFLQSGIHATIAGVVAAFTVPATPHYKIGKYINRIRENIAVFPASDKESVVLSKMQINVLKSIESSSDRVISPLQSLEDSLHGMVNYIILPLFAFANAGVSLTADHGGLEVGMATWAVLAGLLAGKFAGIYFFTWLVIKMGFAGLLKGMTWVNLTGICLLGGIGFTVSL…
8016	GC_00001364		PV29FA01	1942	5	5	1	1	0.999701	1	0.999851	COG3004	Na+/H+ antiporter NhaA (NhaA) (PDB:1ZCD) (PUBMED:25746996)			C|P	Energy production and conversion|Inorganic ion transport and metabolism	MEKLKILNLNFSFQRAAHYHINGGMLLMGVVLLAMFLANSPWGDIYASFWNYEVHLQIGEFNFFSHNGHHMTLMTFINDALMAVFFFSVGLEIKREILVGELSSFRQALLPIVAACGGMLVPVLIYYFMTAGTPAQSGLAIPMATDIAFSLGVLSLFGKRVPLSLKVFLTAFAVVDDIGGILVIALFYTSHLSVNYLIASAGILLILCGGNFFRVHNRWFYIFWGVIMWYLFLQSGIHATIAGVVAAFTVPATPHYKIGKYINRIRENIAVFPASDKESVVLSKMQINVLKSIESSSDRVISPLQSLEDSLHGMVNYIILPLFAFANAGVSLTADHGGLEVGMATWAVLAGLLAGKFAGIYFFTWLVIKMGFAGLLKGMTWVNLTGICLLGGIGFTVSL…
8017	GC_00001364		PV2SA01	977	5	5	1	1	0.999701	1	0.999851	COG3004	Na+/H+ antiporter NhaA (NhaA) (PDB:1ZCD) (PUBMED:25746996)			C|P	Energy production and conversion|Inorganic ion transport and metabolism	MEKLKILNLNFSFQRAAHYHINGGMLLMGVVLLAMFLANSPWGDIYASFWNYEVHLQIGEFNFFSHNGHHMTLMTFINDALMAVFFFSVGLEIKREILVGELSSFRQALLPIVAACGGMLVPVLIYYFMTAGTPAQSGLAIPMATDIAFSLGVLSLFGKRVPLSLKVFLTAFAVVDDIGGILVIALFYTSHLSVNYLIASAGILLILCGGNFFRVHNRWFYIFWGVIMWYLFLQSGIHATIAGVVAAFTVPATPHYKIGKYINRIRENIAVFPASDKESVVLSKMQINVLKSIESSSDRVISPLQSLEDSLHGMVNYIILPLFAFANAGVSLTADHGGLEVGMATWAVLAGLLAGKFAGIYFFTWLVIKMGFAGLLKGMTWVNLTGICLLGGIGFTVSL…
8018	GC_00001364		PV2SA02	1652	5	5	1	1	0.999701	1	0.999851	COG3004	Na+/H+ antiporter NhaA (NhaA) (PDB:1ZCD) (PUBMED:25746996)			C|P	Energy production and conversion|Inorganic ion transport and metabolism	MEKLKILNLNFSFQRAAHYHINGGMLLMGVVLLAMFLANSPWGDIYASFWNYEVHLQIGEFNFFSHNGHHMTLMTFINDALMAVFFFSVGLEIKREILVGELSSFRQALLPIVAACGGMLVPVLIYYFMTAGTPAQSGLAIPMATDIAFSLGVLSLFGKRVPLSLKVFLTAFAVVDDIGGILVIALFYTSHLSVNYLIASAGILLILCGGNFFRVHNRWFYIFWGVIMWYLFLQSGIHATIAGVVAAFTVPATPHYKIGKYINRIRENIAVFPASDKESVVLSKMQINVLKSIESSSDRVISPLQSLEDSLHGMVNYIILPLFAFANAGVSLTADHGGLEVGMATWAVLAGLLAGKFAGIYFFTWLVIKMGFAGLLKGMTWVNLTGICLLGGIGFTVSL…
13199	GC_00002401		PV10SA01	3912	5	5	1	1	0.993095	1	0.996536	COG4555	ABC-type Na+ transport system, ATPase component NatA (NatA)			C|P	Energy production and conversion|Inorganic ion transport and metabolism	MMIEVKNLSFSYGKRKQKVFDDFSLALDKGSVYGLLGKNGTGKSTLLYLMTGLLRPQAGRVLYKGVDVSMRYPLTLQDMFLVPEEFALPSVSLKQYLKLNTPFYPNFSNELLSTCLRDFDMNEDIHLGELSMGQKKKAFMCFALATNTSLLVMDEPSNGLDIPSKSQFRKVIASGMTDEKSVIISTHQVRDIDSLLDHVVIIDGTLVLLNASVKTICDKVYFAEQGMNEPTDTALYVQPSVQGNSVIFPNTHNEETNLNLEVLFNAMLSEREKMQSMFNK
13200	GC_00002401		PV26FA01	2296	5	5	1	1	0.993095	1	0.996536	COG4555	ABC-type Na+ transport system, ATPase component NatA (NatA)			C|P	Energy production and conversion|Inorganic ion transport and metabolism	MMIEVKNLSFSYGKRKQKVFDDFSLALDKGSVYGLLGKNGTGKSTLLYLMTGLLRPQAGRVLYKGVDVSMRYPLTLQDMFLVPEEFALPSVSLKQYLKLNTPFYPNFSNELLSTCLRDFDMNEDIHLGELSMGQKKKAFMCFALATNTSLLVMDEPSNGLDIPSKSQFRKVIASGMTDEKSVIISTHQVRDIDSLLDHVVIIDGTRVLLNASVKTICDKVYFAEQGMNEPTDTALYVQPSVQGNSVIFPNTENEETNLNLEVLFNAMLAEREKMQTMFNK
13201	GC_00002401		PV29FA01	3932	5	5	1	1	0.993095	1	0.996536	COG4555	ABC-type Na+ transport system, ATPase component NatA (NatA)			C|P	Energy production and conversion|Inorganic ion transport and metabolism	MMIEVKNLSFSYGTRKQKVFDDFSLALDKGSVYGLLGKNGTGKSTLLYLMTGLLRPQAGRVLYKGVDVSMRYPLTLQDMFLVPEEFALPSVSLKQYLKLNTPFYPNFSNELLSTCLRDFDMNEDIHLGELSMGQKKKAFMCFALATNTSLLVMDEPSNGLDIPSKSQFRKVIASGMTDEKSVIISTHQVRDIDSLLDHVVIIDGTLVLLNASVKTICDKVYFAEQGMNEPTDTALYVQPSVQGNSVIFPNTHNEETNLNLEVLFNAMLSEREKMQSMFNK
13202	GC_00002401		PV2SA01	3222	5	5	1	1	0.993095	1	0.996536	COG4555	ABC-type Na+ transport system, ATPase component NatA (NatA)			C|P	Energy production and conversion|Inorganic ion transport and metabolism	MMIEVKNLSFSYGKRKQKVFDDFSLALDKGSVYGLLGKNGTGKSTLLYLMTGLLRPQAGRVLYKGVDVSMRYPLTLQDMFLVPEEFALPSVSLKQYLKLNTPFYPNFSNELLSTCLRDFDMNEDIHLGELSMGQKKKAFMCFALATNTSLLVMDEPSNGLDIPSKSQFRKVIASGMTDEKSVIISTHQVRDIDSLLDHVVIIDGTLVLLNASVKTICDKVYFAEQGMNEPTDTALYVQPSVQGNSVIFPNTHNEETNLNLEVLFNAMLAEREKMQSMFNK
13203	GC_00002401		PV2SA02	3897	5	5	1	1	0.993095	1	0.996536	COG4555	ABC-type Na+ transport system, ATPase component NatA (NatA)			C|P	Energy production and conversion|Inorganic ion transport and metabolism	MMIEVKNLSFSYGKRKQKVFDDFSLALDKGSVYGLLGKNGTGKSTLLYLMTGLLRPQAGRVLYKGVDVSMRYPLTLQDMFLVPEEFALPSVSLKQYLKLNTPFYPNFSNELLSTCLRDFDMNEDIHLGELSMGQKKKAFMCFALATNTSLLVMDEPSNGLDIPSKSQFRKVIASGMTDEKSVIISTHQVRDIDSLLDHVVIIDGTLVLLNASVKTICDKVYFAEQGMNEPTDTALYVQPSVQGNSVIFPNTHNEETNLNLEVLFNAMLAEREKMQSMFNK
15049	GC_00002772		PV10SA01	1087	5	5	1	1	0.996419	1	0.998207	COG1668	ABC-type Na+ efflux pump, permease component NatB (NatB)			C|P	Energy production and conversion|Inorganic ion transport and metabolism	MNNTVHNRIFRIARREVFRIATRPLYLFCMIIAPLFCYLFFTTLMWNGLPTDMPAGVVDLDNTATTRSIIRNLDAFQQTKIIAHYPSFADARKAMQQGKIYAFYYIPKGTTEKALASRQPKVSFYTNYSYLVAGSLLYKDQRTMSELAGGAIGRATLYAKGATEDQAMAFLQPIVIDSHVLNNPWLNYSVYLSNTIIPGILMLLIFMTTVYTIGSEMKTNTQKEWMGMADNSITVALTGKLLPQTVVFFVMATFYNVYLYGFLHYPCNSGILPMLFAGLLLVLASQAFGVFLFGLFTTVRLALSTASLWGVISFSISGMSFPVMAMNPVLQALANLFPLRHYFLIYVDLALNGYPLIYAWHSVVALMLFMLLPFFILKRLRTVLLHYVYIP
15050	GC_00002772		PV26FA01	990	5	5	1	1	0.996419	1	0.998207	COG1668	ABC-type Na+ efflux pump, permease component NatB (NatB)			C|P	Energy production and conversion|Inorganic ion transport and metabolism	MNNTVHNRIFRIARREVFRIATRPLYLFCMIIAPLFCYLFFTTLMWNGLPTDMPAGVVDLDNTATTRSIIRNLDAFQQTKIIAHYPSFADARKAMQQGKIYAFYYIPKGTTEKALASRQPKVSFYTNYSYLVAGSLLYKDQRTMSELAGGAIGRATLYAKGATEDQTMAFLQPIVIDSHVLNNPWPNYSVYLSNTIIPGILMLLIFMTTVYTIGSEMKTNTQKEWMGMADNSITVALTGKLLPQTVVFFVMATFYNVYLYGFLHYPCNSGILPMLFAGLLLVLASQAFGVFLFGLFTTVRLALSTASLWGVISFSISGMSFPVMAMNPVLQALANLFPLRHYFLIYVDLALNGYPLIYAWHSVVALMLFMLLPFFILKRLRTVLLHYVYIP
15051	GC_00002772		PV29FA01	2655	5	5	1	1	0.996419	1	0.998207	COG1668	ABC-type Na+ efflux pump, permease component NatB (NatB)			C|P	Energy production and conversion|Inorganic ion transport and metabolism	MNNTVHNRIFRIARREVFRIATRPLYLFCMIIAPLFCYLFFTTLMWNGLPTDMPAGVVDLDNTATTRSIIRNLDAFQQTKIIAHYPSFADARKAMQQGKIYAFYYIPKGTTEKALASRQPKVSFYTNYSYLVAGSLLYKDQRTMSELAGGAIGRATLYAKGATEDQAMAFLQPIVIDSHVLNNPWLNYSVYLSNTIIPGILMLLIFMTTVYTIGSEMKTNTQKEWMGMADNSITVALTGKLLPQTVVFFVMATFYNVYLYGFLHYPCNSGILPMLFAGLLLVLASQAFGVFLFGLFTTVRLALSTASLWGVISFSISGMSFPVMAMNPVLQALANLFPLRHYFLIYVDLALNGYPLIYAWHSVVALMLFMLLPFFILKRLRTVLLHYVYIP
15052	GC_00002772		PV2SA01	374	5	5	1	1	0.996419	1	0.998207	COG1668	ABC-type Na+ efflux pump, permease component NatB (NatB)			C|P	Energy production and conversion|Inorganic ion transport and metabolism	MNNTVHNRIFRIARREVFRIATRPLYLFCMIIAPLFCYLFFTTLMWNGLPTDMPAGVVDLDNTATTRSIIRNLDAFQQTKIIAHYPSFADARKAMQQGKIYAFYYIPKGTTEKALASRQPKVSFYTNYSYLVAGSLLYKDQRTMSELAGGAIGRATLYAKGATEDQAMAFLQPIVIDSHVLNNPWLNYSVYLSNTIIPGILMLLIFMTTVYTIGSEMKTNTQKEWMSMADNSITVALTGKLLPQTVVFFVMATFYNVYLYGFLHYPCNSGILPMLFAGLLLVLASQAFGVFLFGLFTTVRLALSTASLWGVISFSISGMSFPVMAMNPVLQALANLFPLRHYFLIYVDLALNGYPLIYAWHSVVALMLFMLLPFFILKRLRTVLLHYVYIP
15053	GC_00002772		PV2SA02	1049	5	5	1	1	0.996419	1	0.998207	COG1668	ABC-type Na+ efflux pump, permease component NatB (NatB)			C|P	Energy production and conversion|Inorganic ion transport and metabolism	MNNTVHNRIFRIARREVFRIATRPLYLFCMIIAPLFCYLFFTTLMWNGLPTDMPAGVVDLDNTATTRSIIRNLDAFQQTKIIAHYPSFADARKAMQQGKIYAFYYIPKGTTEKALASRQPKVSFYTNYSYLVAGSLLYKDQRTMSELAGGAIGRATLYAKGATEDQAMAFLQPIVIDSHVLNNPWLNYSVYLSNTIIPGILMLLIFMTTVYTIGSEMKTNTQKEWMSMADNSITVALTGKLLPQTVVFFVMATFYNVYLYGFLHYPCNSGILPMLFAGLLLVLASQAFGVFLFGLFTTVRLALSTASLWGVISFSISGMSFPVMAMNPVLQALANLFPLRHYFLIYVDLALNGYPLIYAWHSVVALMLFMLLPFFILKRLRTVLLHYVYIP
17966	GC_00003542	FAST	PV26FA01	19	2	3	2	0	0.999266	1	0.999633	COG1196	Chromosome segregation ATPase Smc (Smc) (PDB:5XG3)			D	Cell cycle control, cell division, chromosome partitioning	MNKKFLSAILFGALMVSSTGTFVSCKDYDDDIDNLQEQINKLATKEDMTSQIATLQAALTTAAKDASDALAKATAAETAAKAAGDAAAAAKAAADKAVADAKAEAIKAVQAEIETLKKEVEESTDAALKEMAEKVDAATKKVEDIVGKIADMVTSVELVASYSANPTGDELIFSTAIEKENVFSEGITNAITFTKGKQVQTGDKFVVRVSPTNAVLTPDMISLTNSQGQNLNEFLSVQKVEKYNGLLSRAAGNNGLWEVTVALKNYDEKAFSAVTETKVGNDTESILFAVQVNNTLSTAETREVISSYDLTLDWTEYVGEKSLNYFVDATNVKDIHNRFTKAEDGTNVTYQELAWKSDAATTIIPLDKVNTNVKVDNGDDRQTQKLYPAVQGEAIKIAL…
17967	GC_00003542	FAST	PV26FA01	2043	2	3	2	0	0.999266	1	0.999633	COG1196	Chromosome segregation ATPase Smc (Smc) (PDB:5XG3)			D	Cell cycle control, cell division, chromosome partitioning	MNKKFLSAILFGALMVSSTGTFVSCKDYDDDIDNLQEQINKLATKEDMTSQIATLQAALTTAAKDASDALAKATAAETAAKAAGDAAAAAKAAADKAVADAKAEAIKAVQAEIETLKKEVEESTDAALKEMAEKVDAATKKVEDIVGKIADMVTSVELVASYSANPTGDELIFSTAIEKENVFSEGITNAITFTKGKQVQTGDKFVVRVSPTNAVLTPDMISLTNSQGQNLNEFLSVQKVEKYNGLLSRAAGNNGLWEVTVALKNYDEKAFSAVTETKVGNDTESILFAVQVNNTLSTAETREVISSYDLTLDWTEYVGEKSLNYFVDATNVKDIHNRFTKAEDGTNVTYQELAWKSDAATTIIPLDKVNTNVKVDNGDDRQTQKLYPAVQGEAIKIAL…
17968	GC_00003542	FAST	PV29FA01	3440	2	3	2	0	0.999266	1	0.999633	COG1196	Chromosome segregation ATPase Smc (Smc) (PDB:5XG3)			D	Cell cycle control, cell division, chromosome partitioning	MNKKFLSAILFGALMVSSTGTFVSCKDYDDDIDNLQEQINKLATKEDMTSQIATLQAALTTAAKDASDALAKATAAETAAKAAGDAAAAAKAAADKAVADAKAEAIKAVQAEIETLKKEVEESTDAALKEMAEKVDAATKKVEDIVGKIADMVTSVELVASYSANPTGDELIFSTAIEKENVFSEGITNAITFTKGKQVQTGDKFVVRVSPTNAVLTPDMISLTNSQGQNLNEFLSVQKVEKYNGLLSRAAGNNGLWEVTVALKNYDEKAFSAVTETKVGNDTESILFAVQVNNTLSTAETREVISSYDLTLDWTEYVGEKSLNYFVDATNVKDIHNRFTKAEDGTNVTYQELAWKSDAATTIIPLDKVNTNVKVDNGDDRQTQKLYPAVQGEAIKIAL…
18594	GC_00003775	PV02	PV2SA01	2395	2	2	1	0	1	1	1	COG1196	Chromosome segregation ATPase Smc (Smc) (PDB:5XG3)			D	Cell cycle control, cell division, chromosome partitioning	MKPVEIEFIMRDKLSPGIDKAGKSAETLGDKAEQVSKSITDRIAAQKEQIKYVESCLKDLKKQYDNLAPGKAQLEMRAEIDACTKALQEDKNILSSLEAEHDKASVSTKRLSMQLREMQDAMARLRLEGKQNTKEYAEMADKAAVLADTIGDLRTQTNILANDDAALQGVMSGVNGLSGLFTTATGVMGIFASENEDLIKIQTRVQSVMAVTMGLQQVMNTLNKDSAFRLVTVVKMKKLLTAANTKLAVSLGISNAAATALMATLTLGLSAVITGLIVLWDKYSDAQEKAAEKAKERVKIESDGRAQMIKTRFEIENTTKSLKDFTGSKEQEKAKVEELNRKYGESFGYYNTVAEWYDVLIQKSDDYIQMLFLQAKAQSLVNKAVEADETVNEVKATPE…
18595	GC_00003775	PV02	PV2SA02	3070	2	2	1	0	1	1	1	COG1196	Chromosome segregation ATPase Smc (Smc) (PDB:5XG3)			D	Cell cycle control, cell division, chromosome partitioning	MKPVEIEFIMRDKLSPGIDKAGKSAETLGDKAEQVSKSITDRIAAQKEQIKYVESCLKDLKKQYDNLAPGKAQLEMRAEIDACTKALQEDKNILSSLEAEHDKASVSTKRLSMQLREMQDAMARLRLEGKQNTKEYAEMADKAAVLADTIGDLRTQTNILANDDAALQGVMSGVNGLSGLFTTATGVMGIFASENEDLIKIQTRVQSVMAVTMGLQQVMNTLNKDSAFRLVTVVKMKKLLTAANTKLAVSLGISNAAATALMATLTLGLSAVITGLIVLWDKYSDAQEKAAEKAKERVKIESDGRAQMIKTRFEIENTTKSLKDFTGSKEQEKAKVEELNRKYGESFGYYNTVAEWYDVLIQKSDDYIQMLFLQAKAQSLVNKAVEADETVNEVKATPE…
19052	GC_00004016	PV02	PV2SA01	2308	2	2	1	0	1	1	1	COG1196	Chromosome segregation ATPase Smc (Smc) (PDB:5XG3)			D	Cell cycle control, cell division, chromosome partitioning	MGYAVLHLEKAKGTDSRMSAHIERTVHPKNADRTRTHLNRELVQFPEGVRNRTQAIAHRIETAGIRRKVSANQVKAIRILLTGSNKDMKQMEAEGRIEDWCNDSLKWIRETYGEQNLVSAVLHMDEKTPHIHATVIPIVTGERRKAGQEEQNGKKKYRKKNPQDVRLCADDVMARHRLKHYQDTYAQAMNKYGLQRGVDGSLAKHISTMQYYKQLVEQQDSLQENIENLLGLEEEAMKKLKQVKEEINVQKMKGAAVNATTAIADGVSSLFGGSKVKRLEEENENLKRNIVNLQKQVQAEQREQTKMENRHSSEINRVDRSYRQKIAEYDNRLELIDTYFPIVKELMPIAEQCREVGFTEELTRRIVSLQPVEFKGRLYSKEYKEKFRTEHSTATVERN…
19053	GC_00004016	PV02	PV2SA02	2983	2	2	1	0	1	1	1	COG1196	Chromosome segregation ATPase Smc (Smc) (PDB:5XG3)			D	Cell cycle control, cell division, chromosome partitioning	MGYAVLHLEKAKGTDSRMSAHIERTVHPKNADRTRTHLNRELVQFPEGVRNRTQAIAHRIETAGIRRKVSANQVKAIRILLTGSNKDMKQMEAEGRIEDWCNDSLKWIRETYGEQNLVSAVLHMDEKTPHIHATVIPIVTGERRKAGQEEQNGKKKYRKKNPQDVRLCADDVMARHRLKHYQDTYAQAMNKYGLQRGVDGSLAKHISTMQYYKQLVEQQDSLQENIENLLGLEEEAMKKLKQVKEEINVQKMKGAAVNATTAIADGVSSLFGGSKVKRLEEENENLKRNIVNLQKQVQAEQREQTKMENRHSSEINRVDRSYRQKIAEYDNRLELIDTYFPIVKELMPIAEQCREVGFTEELTRRIVSLQPVEFKGRLYSKEYKEKFRTEHSTATVERN…
19270	GC_00004128	PV02	PV2SA01	2108	2	2	1	0	1	1	1	COG4641	Spore maturation protein CgeB			D	Cell cycle control, cell division, chromosome partitioning	MRILSVGTFSGLSNTCLHRHWALERVAEKVDKINTSAPKLTLWYRITYHLFLYGLPIAIPESVHENKKIKEYIDKYTYDLVWIDKGITIEAETLKYIKKKQPNCIIVSYSPDNMALRHNQSLQYLNCIPYYDYLITNKSYILNDMKRLGAKNICFVNNSYEAKFHYPRTLSKDDYDRLGGDVGFVGMWEKERCDSILYLANHGIKVRIFGNKQWQKYKNYSPNLQIEDHGLHSEDYSKSLKAFKISLCFLRKMNFDQQTTRSVEIPACGGFMMAERTKEHQAMFEENKEAIFFSSNEELLEKCKYYLEHEKERKKIAEAGLKRCQTSDYSNEGMIKNVLNSIFQTIK
19271	GC_00004128	PV02	PV2SA02	2783	2	2	1	0	1	1	1	COG4641	Spore maturation protein CgeB			D	Cell cycle control, cell division, chromosome partitioning	MRILSVGTFSGLSNTCLHRHWALERVAEKVDKINTSAPKLTLWYRITYHLFLYGLPIAIPESVHENKKIKEYIDKYTYDLVWIDKGITIEAETLKYIKKKQPNCIIVSYSPDNMALRHNQSLQYLNCIPYYDYLITNKSYILNDMKRLGAKNICFVNNSYEAKFHYPRTLSKDDYDRLGGDVGFVGMWEKERCDSILYLANHGIKVRIFGNKQWQKYKNYSPNLQIEDHGLHSEDYSKSLKAFKISLCFLRKMNFDQQTTRSVEIPACGGFMMAERTKEHQAMFEENKEAIFFSSNEELLEKCKYYLEHEKERKKIAEAGLKRCQTSDYSNEGMIKNVLNSIFQTIK
7999	GC_00001361	SLOW	PV10SA01	4200	3	5	2	0	0.989126	0.99385	0.991482	COG1196	Chromosome segregation ATPase Smc (Smc) (PDB:5XG3)			D	Cell cycle control, cell division, chromosome partitioning	MNKKFLSAILFGALMVSSTGTFVSCKDYDDDIDAINKELTDIKSQLAALQTEVDGGNWVTELVDVEGGFKVTFSNGKTYTIVNGKDGAQGEPGTPGKDGNGTIVEVKDGYWYLDGKKTEYVAVKKDDLGKVKVPFVNEAGMWVFYDKDGNEVVSEYKALGATYVVEADGVYTLNVPDADGKMQAIKLPTAGATLTDVELLGWAALDKMDKSLSQGSDIQTTLDIKYAFVGKIVQTWDNKETTWSAQKTVAKGQVLTTLAPNNTYLMARIDAGADAADMSFSLKNSKNAVLPVSLSAATEYKGLLSRGANGMYAIALDNTDAVYTGADKYTGQFTNGLYALVEKSGFISNYNLEVTTS--EAEVVEGKVAKVDGKEIVVDND---KRYYEVNLNKDNVIT…
8000	GC_00001361	SLOW	PV2SA01	3475	3	5	2	0	0.989126	0.99385	0.991482	COG1196	Chromosome segregation ATPase Smc (Smc) (PDB:5XG3)			D	Cell cycle control, cell division, chromosome partitioning	MNKKFLSAILFGALMVSSTGTFVSCKDYDDDIDAINKELTDIKSQLAALQTEVDGGNWVTELVDVEGGFKVTFSNGKTYTIVNGKDGAQGEPGTPGKDGNGTIVEVKDGYWYLDGKKTEYVAVKKDDLGKVKVPFVNEAGMWVFYDKDGNEVVSEYKALGATYVVEADGVYTLNVPDADGKMQAIKLPTAGATLTDVELLGWAALDKMDKSLSQENDIQTTLDIKYAFVGKIVQDWDNKETTWSAQKTVTKGQVLTTLAPNNTYLMARIDAGADAADMSFSLKNSKNAVLPVSLSAATEYKGLLSRGANGMYAIALDNTDAVYTSADKYTGQFTNGLYALVEKSGFISNYNLVVTTSSIKAEVVEGKVATVDGKEIVVDSEDSSKKYYEVNLNKDNVIT…
8001	GC_00001361	SLOW	PV2SA01	4147	3	5	2	0	0.989126	0.99385	0.991482	COG1196	Chromosome segregation ATPase Smc (Smc) (PDB:5XG3)			D	Cell cycle control, cell division, chromosome partitioning	MNKKFLSAILFGALMVSSTGTFVSCKDYDDDIDAINKELTDIKSQLAALQTEVDGGNWVTELVDVEGGFKVTFSNGKTYTIVNGKDGAQGEPGTPGKDGNGTIVEVKDGYWYLDGKKTEYVAVKKDDLGKVKVPFVNEAGMWVFYDKDGNEVVSEYKALGATYVVEADGVYTLNVPDADGKMQAIKLPTAGATLTDVELLGWAALDKMDKSLSQENDIQTTLDIKYAFVGKIVQDWDNKETTWSAQKTVTKGQVLTTLAPNNTYLMARIDAGADAADMSFSLKNSKNAVLPVSLSAATEYKGLLSRGANGMYAIALDNTDAVYTSADKYTGQFTNGLYALVEKSGFISNYNLVVTTSSIKAEVVEGKVATVDGKEIVVDSEDSSKKYYEVNLNKDNVIT…
8002	GC_00001361	SLOW	PV2SA02	151	3	5	2	0	0.989126	0.99385	0.991482	COG1196	Chromosome segregation ATPase Smc (Smc) (PDB:5XG3)			D	Cell cycle control, cell division, chromosome partitioning	MNKKFLSAILFGALMVSSTGTFVSCKDYDDDIDAINKELTDIKSQLAALQTEVDGGNWVTELVDVEGGFKVTFSNGKTYTIVNGKDGAQGEPGTPGKDGNGTIVEVKDGYWYLDGKKTEYVAVKKDDLGKVKVPFVNEAGMWVFYDKDGNEVVSEYKALGATYVVEADGVYTLNVPDADGKMQAIKLPTAGATLTDVELLGWAALDKMDKSLSQENDIQTTLDIKYAFVGKIVQDWDNKETTWSAQKTVTKGQVLTTLAPNNTYLMARIDAGADAADMSFSLKNSKNAVLPVSLSAATEYKGLLSRGANGMYAIALDNTDAVYTSADKYTGQFTNGLYALVEKSGFISNYNLVVTTSSIKAEVVEGKVATVDGKEIVVDSEDSSKKYYEVNLNKDNVIT…
8003	GC_00001361	SLOW	PV2SA02	4153	3	5	2	0	0.989126	0.99385	0.991482	COG1196	Chromosome segregation ATPase Smc (Smc) (PDB:5XG3)			D	Cell cycle control, cell division, chromosome partitioning	MNKKFLSAILFGALMVSSTGTFVSCKDYDDDIDAINKELTDIKSQLAALQTEVDGGNWVTELVDVEGGFKVTFSNGKTYTIVNGKDGAQGEPGTPGKDGNGTIVEVKDGYWYLDGKKTEYVAVKKDDLGKVKVPFVNEAGMWVFYDKDGNEVVSEYKALGATYVVEADGVYTLNVPDADGKMQAIKLPTAGATLTDVELLGWAALDKMDKSLSQENDIQTTLDIKYAFVGKIVQDWDNKETTWSAQKTVTKGQVLTTLAPNNTYLMARIDAGADAADMSFSLKNSKNAVLPVSLSAATEYKGLLSRGANGMYAIALDNTDAVYTSADKYTGQFTNGLYALVEKSGFISNYNLVVTTSSIKAEVVEGKVATVDGKEIVVDSEDSSKKYYEVNLNKDNVIT…
18464	GC_00003712		PV10SA01	1972	2	3	2	0	0.974391	0.741774	0.842318	COG1196	Chromosome segregation ATPase Smc (Smc) (PDB:5XG3)			D	Cell cycle control, cell division, chromosome partitioning	MSKPVEVEFLMKDKLTPGMNKAEREALELRNTVRLLEAELERLRLAGETAAPNLDQSANIAQIHALEKQLEELRGKLKLLQEESESVQVTPADMPNAQRQFNGLHNSIQQMAREMPSLAMGPQMFFLAISNNLPIFTDELARARKEYDELQKSGKKGTPVWKQVLSSLFSWQTAMTTGIMLLVMYGDEIWDWTKNLFSAKKGVDEFNISLKEMTEIEKDGRAQMVRTRFELKSVIDEIKNFTGSKEQEKAKVEELNRKYGESFGYYKTLSEWYDTLIQKSEDYVQVLLHQANVQNLVKKAAEADEEVNKIKAQKPEEAESAMGFFGKWGQYIIQSSMAESGQFYDAQAAIKKHDQEAYDILLKNAENKRDGYLKKAEEEVKKAAEAAKKGNIGGHIDPK…
18465	GC_00003712		PV29FA01	4417	2	3	2	0	0.974391	0.741774	0.842318	COG1196	Chromosome segregation ATPase Smc (Smc) (PDB:5XG3)			D	Cell cycle control, cell division, chromosome partitioning	MSKPVEVEFLMKDKLTPGMNKAEREALELRNTVRLLEAELERLRLAGETAAPNLDQSANIAQIHALEKQLEELRGKLKLLQEESESVQVTPADMPNAQRQFNGLHNSIQQMAREMPSLAMGPQMFFLAISNNLPIFTDELARARKEYDELQKSGKKGTPVWKQVLSSLFSWQTAMTTGIMLLVMYGDEIWDWTKNLFSAKKGVDEFNISLKEMTEIEKDGRAQMVRTRFELKSVIDEIKNFTGSKEQEKAKVEELNRKYGESFGYYKTLSEWYDTLIQKSEDYVQVLLHQTNVQNLVKKAAEADEEVNKIKAQKPEEAESAMGFFGKLGQYIMQSTMAESGQFYDAQAAIKKHDQEAYDILLKNAENKRDGYLKKAEEELKKAEEAAKKGNIGGHTDPE…
18466	GC_00003712		PV29FA01	1670	2	3	2	0	0.974391	0.741774	0.842318	COG1196	Chromosome segregation ATPase Smc (Smc) (PDB:5XG3)			D	Cell cycle control, cell division, chromosome partitioning	MSKPVEVEFLMKDKLTPGMNKAEREALELRNTVRLLEAELERLRLAGETAAPNLDQSANIAQIHALEKQLEELRGKLKLLQEESESVQVTPADMPNAQRQFNGLHNSIQQMAREMPSLAMGPQVFFLAISNNLPIFTDELARARKEYDELQKSGKKGTPVWKQVLSSLFSWQTAMTTGIMLLVMYGDEIWDWTKNLFSAKKGVDEFNISLKEMTEIEKDGRAQMVRTRFELKSVIDEIKNFTGSKEQEKAKVEELNRKYGESFGYYKTLSEWYDTLIQKSEDYVQVLLHQANVQNLVKKAAEADEEVNKIKAQKPEEAESAMGFFGKLGQYIMQSTMAESGQFYDAQAAIKKHDQEAYDILLKNAENKRDGYLKKAEEELKKAEEAAKKGNIGGHTDPE…
19024	GC_00004002		PV10SA01	262	2	2	1	0	1	1	1	COG1475	Chromosome segregation protein Spo0J, contains ParB-like nuclease domain (Spo0J) (PDB:1R71)			D	Cell cycle control, cell division, chromosome partitioning	METNATKRTDIFQIDPRNIVVMDDFNARRDFDLEELKEQIKAKGVLNPITVLPFKDEDGIERYKLVDGERRYRATMLAIEEGTNIPYIKALKLPKDTSTEELLIEQMMRNEGKRFSEYECGIMFKRFKEEFGYTQNEIAEKFKKSPAFVSKCLSLMDLPIEIQERIINKQISASAAKDIVANYDTEEEQVNATRKAVELAEKQGKRTVTNKEINAVQKEAKEAKEIAQALRKVWAYLDGGVMVDVDKLAILLDKTESLSNAMKQYKKLSK
19025	GC_00004002		PV29FA01	3807	2	2	1	0	1	1	1	COG1475	Chromosome segregation protein Spo0J, contains ParB-like nuclease domain (Spo0J) (PDB:1R71)			D	Cell cycle control, cell division, chromosome partitioning	METNATKRTDIFQIDPRNIVVMDDFNARRDFDLEELKEQIKAKGVLNPITVLPFKDEDGIERYKLVDGERRYRATMLAIEEGTNIPYIKALKLPKDTSTEELLIEQMMRNEGKRFSEYECGIMFKRFKEEFGYTQNEIAEKFKKSPAFVSKCLSLMDLPIEIQERIINKQISASAAKDIVANYDTEEEQVNATRKAVELAEKQGKRTVTNKEINAVQKEAKEAKEIAQALRKVWAYLDGGVMVDVDKLAILLDKTESLSNAMKQYKKLSK
486	GC_00000016		PV10SA01	4106	5	23	5	0	0.369807	0.69352	0.482389	COG1196	Chromosome segregation ATPase Smc (Smc) (PDB:5XG3)			D	Cell cycle control, cell division, chromosome partitioning	MNKKFLSAILFGALMVSSTGTFVSCKDYDDDIDN----INKELSTLKGDLSALQAKVNEGKWITSL--APTTGGFTVTFSDNTSYT------------------IT--NGKDGAAGADA-------------VKWE---IGTDGFWYKNDVK-TEYQAVGQAGEAGVAG----------VSPYIGENGNWFAYN-TETKEVEDTGISAAGTSTYVVKNGD--NYELHVY-NQTTGEYESIVLPATA-AA------AALNVVFMPTYSDMQTKVVAINIPVGDELN------DKNHLWDNNVSLTNDIV---FNYRVSPASIDLAKANIGFLVNEVQSRAAGSILDVA-DKSFADGVLTVKAKAGEAFSL-KNKKYAVALQ------------------V…
487	GC_00000016		PV10SA01	3956	5	23	5	0	0.369807	0.69352	0.482389	COG1196	Chromosome segregation ATPase Smc (Smc) (PDB:5XG3)			D	Cell cycle control, cell division, chromosome partitioning	MNKKFLSAILFGALMVTSTGTFVSCKDYDDDIDR----IDKELSEVKETIASLDSAIKAGKFVQSC--NEVTGGYELVFTDGSKIT------------------IK--NGTNGTDGAAG-------------TTVIPEFRVEGNYWQVSTDKGATWVDVKDTEGNKVPARGQ-------DGEAAGSNVSWVTVDGVEYIKIGDKVTDLKQNNEFPNIAVDAESKTVIV--TIDGQNY--TLLQEGS-AF------KGLQTVVYRKQAVDDAEDVCKAYDIYWMEN------EGSLNPDKDVLFASVPA--YASFKVYPGDFSLNNAKFSFVDTYQVRSVAPALTYMEGSAKLENGILSLAILPNEGIGN-NTYATSLDVT------------------M…
488	GC_00000016		PV10SA01	448	5	23	5	0	0.369807	0.69352	0.482389	COG1196	Chromosome segregation ATPase Smc (Smc) (PDB:5XG3)			D	Cell cycle control, cell division, chromosome partitioning	MNKKFLSAVLFGALMVSSTGTFVSCKDYDEDIDR----IDKELVDIKSALSALQAKVDAGKYVTNV--VKNGDGITVTWSDNSTST------------------IETIKGDKGEDGKNG-------------TVVT----IIDGYWAFDGVK-SEYPAKGDKGDQGEPGDAA---AAGHDAKIS-ENGYWMVWD-TEKAAYVETEYIAGGAVAAQVKGGW--NITV----KDENGDEQTIFIPSSA-TM------GYMDVL--------NGANLMHAL---YGIN------EKDVEYGPAKKTLKKGL-----YTTLDRDLEVVVNPQGTDASAYSFNLMNS-ANVDTELPFKDAVPFKGVLTRA-----TSENAVWVLPHDFVR-------------Y…
489	GC_00000016		PV10SA01	3810	5	23	5	0	0.369807	0.69352	0.482389	COG1196	Chromosome segregation ATPase Smc (Smc) (PDB:5XG3)			D	Cell cycle control, cell division, chromosome partitioning	MNKKFLSAVLFGALMVSSTGTFVSCKDYDDDIEELWGAVNGGKEDLSKKVSALETSVSDLQSAQ----TKLEAEIAAAKKEAADAK-----------------AAADQAAADAADAKAA-------------ALQAEKNAIEAAKAEIAKVKEELVKMIQNNQGASEEDIKAI------ESEIATIKGDITALTAAYKGADAEILDKLSKVEGVLGERITNLEADVKTNKEEIGKLQSALKLQQDALDAYKEATGKELGDVKTKLEACEKAVEALQGFDVAETKA------AIEQLKNDYKKIAEEITKINTNLDVLSSAIYTGVTHVSLVNSE-----SNNQGEDKWNLNFESVLIQKNIFGDEWTLD-KTIANKLEFK-------------------…
490	GC_00000016		PV10SA01	4063	5	23	5	0	0.369807	0.69352	0.482389	COG1196	Chromosome segregation ATPase Smc (Smc) (PDB:5XG3)			D	Cell cycle control, cell division, chromosome partitioning	MNKKFLSAILFGALMVSSTGTFVSCKDYDDDIDR----IDNTLNDLKSQIAALQTEVANGNWVTSV--TPTEGGFTVVFKDGKTYT------------------IV--NGKDGEKGDKGEDGKG--------TEVT----VKDGYWYIDGEK-TDYLAVTSEDLKEVK-----------VPYINEEDGYWYFYN--DKGEAEKSPYKAIGAAYAVNDGG---VFTLYM--PDANGVMQTIKLPTAASAI------SSIEFLDNDYQAINDLNQITLLY---WDAA------ATTEWKGPRGNISNNITTYSTDLSGSDNVLYTRIAPSSVDASELAFSLIDTKDNVA--------SIALAAEKYDGMLTRAAENGLYDITV-----------------V…
491	GC_00000016		PV26FA01	2105	5	23	5	0	0.369807	0.69352	0.482389	COG1196	Chromosome segregation ATPase Smc (Smc) (PDB:5XG3)			D	Cell cycle control, cell division, chromosome partitioning	MNKKFLSAILFGALMVSSTGTFVSCKDYDDDIDN----INKELSTLKGDLSALQAKVNEGKWITSL--APTTGGFTVTFSDNTSYT------------------IT--NGKDGAAGADA-------------VKWE---IGTDGFWYKNDVK-TEYQAVGQAGEAGVAG----------VSPYIGENGNWFAYN-TETKEVEDTGISAAGTSTYVVKNGD--NYELHVY-NQTTGEYESIVLPATA-AA------AALNVVFMPTYSDMQTKVVAINIPVGDELN------DKNHLWDNNVSLTNDIV---FNYRVSPASIDLAKANIGFLVNEVQSRAAGSILDVA-DKSFADGVLTVKAKAGEAFSL-KNKKYAVALQ------------------V…
492	GC_00000016		PV26FA01	1856	5	23	5	0	0.369807	0.69352	0.482389	COG1196	Chromosome segregation ATPase Smc (Smc) (PDB:5XG3)			D	Cell cycle control, cell division, chromosome partitioning	MNKKFLSAVLFGALMVSSTGTFVSCKDYDEDIDR----IDKELVDIKSALSALQAKVDAGKYVTNV--VKNGDGITVTWSDNSTST------------------IETIKGDKGEDGKNG-------------TVVT----IIDGYWAFDGVK-SEYPAKGDKGDKGDQGEPGDAAAAGHDAKIS-ENGYWMVWD-TEKAAYVETEYIAGGAVAAQVKGGW--NITV----KDENGDEQTIFIPSSA-TM------GYMDVL-------NGANPMMRAL---YGIN------EKDVEYGPAKKTLKKGL-----YTTLDRDLEVVVNPQGTDASAYSFSLMNS-ANVDTELPFKDAVPFKGVLTRA-----TSENAVWVLPHDFVR-------------Y…
493	GC_00000016		PV26FA01	2247	5	23	5	0	0.369807	0.69352	0.482389	COG1196	Chromosome segregation ATPase Smc (Smc) (PDB:5XG3)			D	Cell cycle control, cell division, chromosome partitioning	MNKKFLSAILFGALMVSSTGTFVSCKDYDDDIDN----INKELTDIKATIASLDAAIEAGKSISSY--TAVANGYELTFTDGSKII------------------IS--NGKDGAQGEQGLQGIQGPAGPAGSSIVPKFKVDADSYWMVSVDEGGTYEYVLNEAGEKIKATGANAS----ADDIADAVGNLIYVDEDGYINIGDYKTSFKYNATIPSMIYNEKDQTMKV--TIDGREY--TLLMEGS-AF------NGLQTIVYRKQATDDMNDIVYAY--LLKYK------DKDGNRDKDVLFASVPA--KAEFKVYPETFSLSDAEFYFSDTYKTRAAVPALSYVEKSASLENGILSVSMRPQNMVSG-TNYKTSLDVK------------------M…
494	GC_00000016		PV26FA01	867	5	23	5	0	0.369807	0.69352	0.482389	COG1196	Chromosome segregation ATPase Smc (Smc) (PDB:5XG3)			D	Cell cycle control, cell division, chromosome partitioning	MNKKFLSAVLFGALMATSTGTFVSCKDYDDDIDQ----INNKLSSVETTIADLQKKIGDGAYVKSI--TQAADGFTVTMSDGSTTT------------------ITGIKGDAGQDGKDG-------------AEWT----IVDGYWACNGEK-TDVKAVGTDGKDG-------------QKEVEKRADGWYLWNGTDYEKVTVDAPATAGVPYYQIDPKD-ENYAIMYIYDATGKNEQAIRLPLNE-GL------VQLYVR----------NNISYL-NINFAKA------KSDIKWDGKKAAPKKGE--YIITQSFD-SLMVQVNPTNYDLASIKELSLMTSQNVKVPVTLSAPVAFKGILSEATSRA-VSEGGLYKIA------------------V…
495	GC_00000016		PV29FA01	3637	5	23	5	0	0.369807	0.69352	0.482389	COG1196	Chromosome segregation ATPase Smc (Smc) (PDB:5XG3)			D	Cell cycle control, cell division, chromosome partitioning	MNKKFLSAVLFGALMVSSTGTFVSCKDYDEDIDR----IDKELVDIKSALSALQAKVDAGKYVTNV--VKNGDGITVTWSDNSTST------------------IETIKGDKGEDGKNG-------------TVVT---II-DGYWAFDGVK-SEYPAKGDKGDKGDQGEPGDAAAAGHDAKVNEETGYWQVWD-AEKGAYVDTKYIAGGLRVVEVAGGY--NFTV----TEANGEPKTIFIPGGA-AL------LSIIPE-------LNGQNYAQDFDIYYGIL------NNDVDWAGHKAVNGKML--KGMYPTADRDIKMQVNPAGADADAYDWAFVSTDNTTPWGLNFGAPQAWTG-KATTATRA-TSANGMWLLPRDVQKWDLDAAGSQGRPDY…
496	GC_00000016		PV29FA01	3366	5	23	5	0	0.369807	0.69352	0.482389	COG1196	Chromosome segregation ATPase Smc (Smc) (PDB:5XG3)			D	Cell cycle control, cell division, chromosome partitioning	MNKKFLSAILFGALMVSSTGTFVSCKDYDDDIDN----INKELSTLKGDLSALQAKVNEGKWITSL--APTTGGFTVTFSDNTSYT------------------IT--NGKDGAAGADA-------------VKWE---IGTDGFWYKNDVK-TEYQAVGQAGEAGVAG----------VSPYIGENGNWFAYN-TETKEVEDTGISAAGTSTYVVKNGD--NYELHVY-NQTTGEYESIVLPATA-AA------AALNVVFMPTYSDMQTKVVAINISVGDDLN------DKNHLWDNNVSLTNDIV---FNYRVSPASIDLAKANIGFLVNEVQSRAAGSILDVA-DKSFADGVLTVKAKAGEAFSL-KNKKYAVALQ------------------V…
497	GC_00000016		PV29FA01	3224	5	23	5	0	0.369807	0.69352	0.482389	COG1196	Chromosome segregation ATPase Smc (Smc) (PDB:5XG3)			D	Cell cycle control, cell division, chromosome partitioning	MNKKFLSAILFGALMVTSTGTFVSCKDYDDDIDR----IDKELSEVKETIASLDSAIKAGKFVQSC--NEVTGGYELVFTDGSKIT------------------IK--NGTNGTDGAAG-------------TTVIPEFRVEGNYWQVSTDKGATWVDVKDTEGNKVPARGQ-------DGEAAGSNVSWVTVDGVEYIKIGDKVTDLKQNNEFPNIAVDAESKTVIV--TIDGQNY--TLLQEGS-AF------KGLQTVVYRKQAVDDASDICKAYDIYWMEN------EGSLNPDKDVLFASVPA--YASFKVYPGDFSLNNAKFSFVDTYQVRSVAPALTYMEGSAKLENGILSLAILPNEGIGN-NTYATSLDVT------------------M…
498	GC_00000016		PV29FA01	3322	5	23	5	0	0.369807	0.69352	0.482389	COG1196	Chromosome segregation ATPase Smc (Smc) (PDB:5XG3)			D	Cell cycle control, cell division, chromosome partitioning	MNKKFLSAILFGALMVSSTGTFVSCKDYDDDIDE----LTSRVDGIESQIKDLEAKINAANWITSV--TPATGGFTVAFNDGSSYT------------------IT--NGKDGEAGAAG-------------TEWT---ISEDGFWVCNGEK-TTVKAVGQDGAQGEPGKDA-------QPEVKKENGKWYLWNGTEFEEFAGATAPAANIPFYYTDPTDP-NYNILVIYDENGKEPLEIRLPMAA-DL------GQIVVL---------GENLDINYHRFNGLHINKEGQVKEATWDGSKAMPAKGQ---YMLTANQDYVYVQVVPSNYDISKLNFKLVNTKGDEA-PVVFGTPVPTNDAISNSRA---ISESGVFAIPYS----------------L…
499	GC_00000016		PV29FA01	3499	5	23	5	0	0.369807	0.69352	0.482389	COG1196	Chromosome segregation ATPase Smc (Smc) (PDB:5XG3)			D	Cell cycle control, cell division, chromosome partitioning	MNKKFLSAILFGALMVTSTGTFVSCKDYDDDIDS----LNEKVDKLTKDLSELQAA--AGKYVTAVKYDAATGKLTVTGGNGETFQLPMPAELPTYSLKVVDGKIQLLDGDKVVSEAPLPTTDAPAAFDPTLLKWN------NGYLYYGDVKISGVEKPQSVGSITEVKDEETGEVIGYVIELDGKSATFSVVTDLKALVFEPELYYQGIEAIAVKSFVYKALTAKDVNADADNKDDAPVQETATTEVT------PELSATYHMNPSTADVRNLVKE-DLKFLAY------DKEYARAADGVVVPEIS---------------KVEPKNGELTVWAKLTEGTIKDIENDDKVTVLALQANYLNGDNKRSVITSDYAAVKAVKITDL------------V…
500	GC_00000016		PV2SA01	3964	5	23	5	0	0.369807	0.69352	0.482389	COG1196	Chromosome segregation ATPase Smc (Smc) (PDB:5XG3)			D	Cell cycle control, cell division, chromosome partitioning	MNKKFLSAVLFGALMVSSTGTFVSCKDYDEDIDR----IDKELVDIKSALSALQAKVDAGKYVTNV--VKNGDGITVTWSDNSTST------------------IETIKGDKGEDGKNG-------------TVVT---II-DGYWAFDGVK-SEYPAKGDKGDKGDQGEPGDAAAAGHDAKVNEETGYWQVWD-AEKGAYVDTKYIAGGLRVVEVAGGY--NFTV----TEANGEPKTIFIPGGA-AL------LSIIPE-------LNGQNYAQDFDIYYGIL------NNDVDWAGHKAVNGKML--KGMYPTADRDIKMQVNPAGADADAYDWAFVSTDNTTPWGLNFGAPQAWTG-KATTATRA-TSANGMWLLPRDVQKWDLDAAGSQGRPDY…
501	GC_00000016		PV2SA01	3412	5	23	5	0	0.369807	0.69352	0.482389	COG1196	Chromosome segregation ATPase Smc (Smc) (PDB:5XG3)			D	Cell cycle control, cell division, chromosome partitioning	MNKKFLSAILFGALMVSSTGTFVSCKDYDDDIDN----INKELSTLKGDLSALQAKVNEGKWITSL--APTTGGFTVTFSDNTSYT------------------IT--NGKDGAAGADA-------------VKWE---IGTDGFWYKNDVK-TEYQAVGQAGEAGVAG----------VSPYIGENGNWFAYN-TETKEVEDTGISAAGTSTYVVKNGD--NYELHVY-NQTTGEYESIVLPATA-AA------AALNVVFMPTYSDMQTKVVAINISVGDDLN------DKNHLWDNNVSLTNDIV---FNYRVSPASIDLAKANIGFLVNEVQSRAAGSILDVA-DKSFADGVLTVKAKAGEAFSL-KNKKYAVALQ------------------V…
502	GC_00000016		PV2SA01	3266	5	23	5	0	0.369807	0.69352	0.482389	COG1196	Chromosome segregation ATPase Smc (Smc) (PDB:5XG3)			D	Cell cycle control, cell division, chromosome partitioning	MNKKFLSAILFGALMVTSTGTFVSCKDYDDDIDR----IDKELSEVKETIASLDSAIKAGKFVQSC--NEVTGGYELVFTDGSKIT------------------IK--NGTNGTDGAAG-------------TTVIPEFRVEGNYWQVSTDKGATWVDVKDTEGNKVPARGQ-------DGEAAGSNVSWVTVDGVEYIKIGDKVTDLKQNNEFPNIAVDAESKTVIV--TIDGQNY--TLLQEGS-AF------KGLQTVVYRKQAVDDLKDICKAYDIYWLEN------EGTFDSDKDVLFASVPA--YASFKVYPGDFSLNNAKFSFVDTYQVRSVAPALTYMEGSAKLENGILSLAILPNEGIETYSNYATSLDVT------------------M…
503	GC_00000016		PV2SA01	3367	5	23	5	0	0.369807	0.69352	0.482389	COG1196	Chromosome segregation ATPase Smc (Smc) (PDB:5XG3)			D	Cell cycle control, cell division, chromosome partitioning	MNKKFLSAILFGALMVSSTGTFVSCKDYDDDIDE----LTSRVDGVEGQIKDLEAKINAANWITSV--TPATGGFTVAFNDGSSYT------------------IT--NGKDGEAGAAG-------------TEWT---ISEDGFWVCNGEK-TTVKAVGQDGAQGEPGKDA-------QPEVKKENGKWYLWNGTEFEEFAGA-TPATNVPYYYADPTDPNNYVIMVVCDKDGKNEKSVRLPLNE-GL------AQITVL-------------ENNFNIAYSIA------------------------------------------------------------------------------------------------------------------…
504	GC_00000016		PV2SA02	4150	5	23	5	0	0.369807	0.69352	0.482389	COG1196	Chromosome segregation ATPase Smc (Smc) (PDB:5XG3)			D	Cell cycle control, cell division, chromosome partitioning	MNKKFLSAVLFGALMASSTGTFVSCKDYDDDID-------------------------------------------------------------------------------GFAGTAE----------------------------------------------------------------------------------------------------------------------------------------------------------------------------------------------------------------------------------------------------------------------------------------…
505	GC_00000016		PV2SA02	204	5	23	5	0	0.369807	0.69352	0.482389	COG1196	Chromosome segregation ATPase Smc (Smc) (PDB:5XG3)			D	Cell cycle control, cell division, chromosome partitioning	MNKKFLSAVLFGALMVSSTGTFVSCKDYDEDIDR----IDKELVDIKSALSALQAKVDAGKYVTNV--VKNGDGITVTWSDNSTST------------------IETIKGDKGEDGKNG-------------TVVT---II-DGYWAFDGVK-SEYPAKGDKGDKGDQGEPGDAAAAGHDAKVNEETGYWQVWD-AEKGAYVDTKYIAGGLRVVEVAGGY--NFTV----TEANGEPKTIFIPGGA-AL------LSIIPE-------LNGQNYAQDFDIYYGIL------NNDVDWAGHKAVNGKML--KGMYPTADRDIKMQVNPAGADADAYDWAFVSTDNTTPWGLNFGAPQAWTG-KATTATRA-TSANGMWLLPRDVQKWDLDAAGSQGRPDY…
506	GC_00000016		PV2SA02	4087	5	23	5	0	0.369807	0.69352	0.482389	COG1196	Chromosome segregation ATPase Smc (Smc) (PDB:5XG3)			D	Cell cycle control, cell division, chromosome partitioning	MNKKFLSAILFGALMVSSTGTFVSCKDYDDDIDN----INKELSTLKGDLSALQAKVNEGKWITSL--APTTGGFTVTFSDNTSYT------------------IT--NGKDGAAGADA-------------VKWE---IGTDGFWYKNDVK-TEYQAVGQAGEAGVAG----------VSPYIGENGNWFAYN-TETKEVEDTGISAAGTSTYVVKNGD--NYELHVY-NQTTGEYESIVLPATA-AA------AALNVVFMPTYSDMQTKVVAINISVGDDLN------DKNHLWDNNVSLTNDIV---FNYRVSPASIDLAKANIGFLVNEVQSRAAGSILDVA-DKSFADGVLTVKAKAGEAFSL-KNKKYAVALQ------------------V…
507	GC_00000016		PV2SA02	3941	5	23	5	0	0.369807	0.69352	0.482389	COG1196	Chromosome segregation ATPase Smc (Smc) (PDB:5XG3)			D	Cell cycle control, cell division, chromosome partitioning	MNKKFLSAILFGALMVTSTGTFVSCKDYDDDIDR----IDKELSEVKETIASLDSAIKAGKFVQSC--NEVTGGYELVFTDGSKIT------------------IK--NGTNGTDGAAG-------------TTVIPEFRVEGNYWQVSTDKGATWVDVKDTEGNKVPARGQ-------DGEAAGSNVSWVTVDGVEYIKIGDKVTDLKQNNEFPNIAVDAESKTVIV--TIDGQNY--TLLQEGS-AF------KGLQTVVYRKQAVDDLKDICKAYDIYWLEN------EGTFDSDKDVLFASVPA--YASFKVYPGDFSLNNAKFSFVDTYQVRSVAPALTYMEGSAKLENGILSLAILPNEGIETYSNYATSLDVT------------------M…
508	GC_00000016		PV2SA02	4042	5	23	5	0	0.369807	0.69352	0.482389	COG1196	Chromosome segregation ATPase Smc (Smc) (PDB:5XG3)			D	Cell cycle control, cell division, chromosome partitioning	MNKKFLSAILFGALMVSSTGTFVSCKDYDDDIDE----LTSRVDGVEGQIKDLEAKINAANWITSV--TPATGGFTVAFNDGSSYT------------------IT--NGKDGEAGAAG-------------TEWT---ISEDGFWVCNGEK-TTVKAVGQDGAQGEPGKDA-------QPEVKKENGKWYLWNGTEFEEFAGA-TPATNVPYYYADPTDPNNYVIMVVCDKDGKNEKSVRLPLNE-GL------AQITVL-------------ENNFNIAYSIA------------------------------------------------------------------------------------------------------------------…
1912	GC_00000156		PV10SA01	4192	5	7	2	0	0.992844	0.853024	0.917638	COG1196	Chromosome segregation ATPase Smc (Smc) (PDB:5XG3)			D	Cell cycle control, cell division, chromosome partitioning	MNKKFLSAILFGALMVTSTGTFVSCKDYDDDIDRLDQEISNVKDAIKALEDKVGSGKYVESCTPFTDGNGGYEIKFSDGETIKLYNGAKGEQGEPGKPGTPGTPGTSADDYVVSVEEGESAYELVITYADGTKKTISMPKATSVVSGVKFIPTFLSEGEAARIHFPTIVTDSVAGKTEITGADWGTNNFSTFKIVYSGKADVKYQVNPNSVSFKDMEVVGFVRDTAEIWNYNTNNKNWELFNAGQKLYTDGKITVESYKEGHGMLNFRVKDWAFAEQSNLDERTVYSLRIKNNDQIVHSDFVPAKHEVILQKNVHLVKVADAFDQTNAPAQIKNAIAPNKVNYREFIKDEYYLNTLNPTGTEEAKLKAYQADKAKFEANAENQLYKGDAESKDDAERIV…
1914	GC_00000156		PV26FA01	2035	5	7	2	0	0.992844	0.853024	0.917638	COG1196	Chromosome segregation ATPase Smc (Smc) (PDB:5XG3)			D	Cell cycle control, cell division, chromosome partitioning	MNKKFLSAILFGALMVTSTGTFVSCKDYDDDIDRLDQEISNVKDAIKALEDKVGSGKYVESCTPFTDGNGGYEIKFSDGETIKLYNGAKGEQGEPGKPGTPGTPGTSADDYVVSVEEGESAYELVITYADGTKKTISMPKATSVVSGVKFIPTFLSEGEAARIHFPTIVTDSVAGKTEITGADWGTNNFSTFKIVYSGKADVKYQVNPNSVSFKDMEVVGFVRDTAEIWNYNTNNKNWELFNAGQKLYTDGKITVESYKEGHGMLNFRVKDWAFAEQSNLDERTVYSLRIKNNDQIVHSDFVPAKHEVILQKNVHLVKVADAFDQTNAPAQIKNAIAPNKVNYREFIKDEYYLNTLNPTGTEEAKLKAYQADKAKFEANAENQLYKGDAESKDDAERIV…
1915	GC_00000156		PV29FA01	3448	5	7	2	0	0.992844	0.853024	0.917638	COG1196	Chromosome segregation ATPase Smc (Smc) (PDB:5XG3)			D	Cell cycle control, cell division, chromosome partitioning	MNKKFLSAILFGALMVTSTGTFVSCKDYDDDIDRLDQEISNVKDAIKALEDKVGSGKYVESCTPFTDGNGGYEIKFSDGETIKLYNGAKGEQGEPGKPGTPGTPGTSADDYVVSVEEGESAYELVITYADGTKKTISMPKATSVVSGVKFIPTFLSEGEAARIHFPTIVTDSVAGKTEITGADWGTNNFSTFKIVYSGKADVKYQVNPNSVSFKDMEVVGFVRDTAEIWNYNTNNKNWELFNAGQKLYTDGKITVESYKEGHGMLNFRVKDWAFAEQSNLDERTVYSLRIKNNDQIVHSDFVPAKHEVILQKNVHLVKVADAFDQTNAPAQIKNAIAPNKVNYREFIKDEYYLNTLNPTGTEEAKLKAYQADKAKFEANAENQLYKGDAESKDDAERIV…
1916	GC_00000156		PV2SA01	4138	5	7	2	0	0.992844	0.853024	0.917638	COG1196	Chromosome segregation ATPase Smc (Smc) (PDB:5XG3)			D	Cell cycle control, cell division, chromosome partitioning	MNKKFLSAILFGALMVTSTGTFVSCKDYDDDIDRLDQEISNVKDAIKALEDKVGSGKYVESCTPFTDGNGGYEIKFSDGETIKLYNGAKGEQGEPGKPGTPGTPGTSADDYVVSVEEGESAYELVITYADGTKKTISMPKATSVVSGVKFIPTFLSEGEAARIHFPTIVTDSVAGKTEITGADWGTNNFSTFKIVYSGKADVKYQVNPNSVSFKDMEVVGFVRDTAEIWNYNTNNKNWELFNAGQKLYTDGKITVESYKEGHGMLNFRVKDWAFAEQSNLDERTVYSLRIKNNDQIVHSDFVPAKHEVILQKNVHLVKVADAFDQTNAPAQIKNAIAPNKVNYREFIKDEYYLNTLNPTGTEEAKLKAYQADKAKFEANAENQLYKGDAESKDDAERIV…
2729	GC_00000305		PV10SA01	3687	5	5	1	1	1	1	1	COG0772	Peptodoglycan polymerase FtsW/RodA/SpoVE (FtsW) (PDB:6BAR) (PUBMED:30692671)			D	Cell cycle control, cell division, chromosome partitioning	MAYTNDSIWKSVDWMTICIYLMLVIFGWFSVCGASYDYGEIDFFSFDTRAGKQFVWICCSLGLGFILMMLEDKLYDMFAYILYGGMMLLLLITPFLAEDTKGSYSWIKFGPVSLQPAEFAKFATALALAKFMNVYGFTMSKLKYSLPVVGMVLLPMLLIILQRETGSALVYLAFFFMLYREGMPGSILFAGICAVVYFVVGIRFGNELMADDCTSIGEFSVLLLIVILSALLVNSYCKKASVVWYIGGIGVGGTLLALLFSYYVIPFDITWFQYGLCVVLLFYLIFLSMHERMRNYFYIALFAIGSVGFLFSADYVFNNVLEPHQQIRIKVVLGMEEDLAGAGYNVNQSKIAIGSGGLWGKGFLNGTQTKLKYVPEQDTDFIFCTVGEEEGFIGSAAVL…
2730	GC_00000305		PV26FA01	2458	5	5	1	1	1	1	1	COG0772	Peptodoglycan polymerase FtsW/RodA/SpoVE (FtsW) (PDB:6BAR) (PUBMED:30692671)			D	Cell cycle control, cell division, chromosome partitioning	MAYTNDSIWKSVDWMTICIYLMLVIFGWFSVCGASYDYGEIDFFSFDTRAGKQFVWICCSLGLGFILMMLEDKLYDMFAYILYGGMMLLLLITPFLAEDTKGSYSWIKFGPVSLQPAEFAKFATALALAKFMNVYGFTMSKLKYSLPVVGMVLLPMLLIILQRETGSALVYLAFFFMLYREGMPGSILFAGICAVVYFVVGIRFGNELMADDCTSIGEFSVLLLIVILSALLVNSYCKKASVVWYIGGIGVGGTLLALLFSYYVIPFDITWFQYGLCVVLLFYLIFLSMHERMRNYFYIALFAIGSVGFLFSADYVFNNVLEPHQQIRIKVVLGMEEDLAGAGYNVNQSKIAIGSGGLWGKGFLNGTQTKLKYVPEQDTDFIFCTVGEEEGFIGSAAVL…
2731	GC_00000305		PV29FA01	4190	5	5	1	1	1	1	1	COG0772	Peptodoglycan polymerase FtsW/RodA/SpoVE (FtsW) (PDB:6BAR) (PUBMED:30692671)			D	Cell cycle control, cell division, chromosome partitioning	MAYTNDSIWKSVDWMTICIYLMLVIFGWFSVCGASYDYGEIDFFSFDTRAGKQFVWICCSLGLGFILMMLEDKLYDMFAYILYGGMMLLLLITPFLAEDTKGSYSWIKFGPVSLQPAEFAKFATALALAKFMNVYGFTMSKLKYSLPVVGMVLLPMLLIILQRETGSALVYLAFFFMLYREGMPGSILFAGICAVVYFVVGIRFGNELMADDCTSIGEFSVLLLIVILSALLVNSYCKKASVVWYIGGIGVGGTLLALLFSYYVIPFDITWFQYGLCVVLLFYLIFLSMHERMRNYFYIALFAIGSVGFLFSADYVFNNVLEPHQQIRIKVVLGMEEDLAGAGYNVNQSKIAIGSGGLWGKGFLNGTQTKLKYVPEQDTDFIFCTVGEEEGFIGSAAVL…
2732	GC_00000305		PV2SA01	3060	5	5	1	1	1	1	1	COG0772	Peptodoglycan polymerase FtsW/RodA/SpoVE (FtsW) (PDB:6BAR) (PUBMED:30692671)			D	Cell cycle control, cell division, chromosome partitioning	MAYTNDSIWKSVDWMTICIYLMLVIFGWFSVCGASYDYGEIDFFSFDTRAGKQFVWICCSLGLGFILMMLEDKLYDMFAYILYGGMMLLLLITPFLAEDTKGSYSWIKFGPVSLQPAEFAKFATALALAKFMNVYGFTMSKLKYSLPVVGMVLLPMLLIILQRETGSALVYLAFFFMLYREGMPGSILFAGICAVVYFVVGIRFGNELMADDCTSIGEFSVLLLIVILSALLVNSYCKKASVVWYIGGIGVGGTLLALLFSYYVIPFDITWFQYGLCVVLLFYLIFLSMHERMRNYFYIALFAIGSVGFLFSADYVFNNVLEPHQQIRIKVVLGMEEDLAGAGYNVNQSKIAIGSGGLWGKGFLNGTQTKLKYVPEQDTDFIFCTVGEEEGFIGSAAVL…
2733	GC_00000305		PV2SA02	3735	5	5	1	1	1	1	1	COG0772	Peptodoglycan polymerase FtsW/RodA/SpoVE (FtsW) (PDB:6BAR) (PUBMED:30692671)			D	Cell cycle control, cell division, chromosome partitioning	MAYTNDSIWKSVDWMTICIYLMLVIFGWFSVCGASYDYGEIDFFSFDTRAGKQFVWICCSLGLGFILMMLEDKLYDMFAYILYGGMMLLLLITPFLAEDTKGSYSWIKFGPVSLQPAEFAKFATALALAKFMNVYGFTMSKLKYSLPVVGMVLLPMLLIILQRETGSALVYLAFFFMLYREGMPGSILFAGICAVVYFVVGIRFGNELMADDCTSIGEFSVLLLIVILSALLVNSYCKKASVVWYIGGIGVGGTLLALLFSYYVIPFDITWFQYGLCVVLLFYLIFLSMHERMRNYFYIALFAIGSVGFLFSADYVFNNVLEPHQQIRIKVVLGMEEDLAGAGYNVNQSKIAIGSGGLWGKGFLNGTQTKLKYVPEQDTDFIFCTVGEEEGFIGSAAVL…
3814	GC_00000522		PV10SA01	1441	5	5	1	1	1	1	1	COG3087	Cell division protein FtsN (FtsN) (PDB:1UTA)			D	Cell cycle control, cell division, chromosome partitioning	MKKLVVLGMGLCVALAFSSCKSSESAYKKAYEKAKQQELAEAPADQVEATPVEAAPVVSAPVTTAPVAGPVREEKVELVSGDGLKAYSVVCGSFGVKANAEGLKQYLDGQGYNAKVVYNAERNTYRVIASSYDDRAEATQAKEEFKAKYPNRDDFQKAWLLYRVY
3815	GC_00000522		PV26FA01	605	5	5	1	1	1	1	1	COG3087	Cell division protein FtsN (FtsN) (PDB:1UTA)			D	Cell cycle control, cell division, chromosome partitioning	MKKLVVLGMGLCVALAFSSCKSSESAYKKAYEKAKQQELAEAPADQVEATPVEAAPVVSAPVTTAPVAGPVREEKVELVSGDGLKAYSVVCGSFGVKANAEGLKQYLDGQGYNAKVVYNAERNTYRVIASSYDDRAEATQAKEEFKAKYPNRDDFQKAWLLYRVY
3816	GC_00000522		PV29FA01	2192	5	5	1	1	1	1	1	COG3087	Cell division protein FtsN (FtsN) (PDB:1UTA)			D	Cell cycle control, cell division, chromosome partitioning	MKKLVVLGMGLCVALAFSSCKSSESAYKKAYEKAKQQELAEAPADQVEATPVEAAPVVSAPVTTAPVAGPVREEKVELVSGDGLKAYSVVCGSFGVKANAEGLKQYLDGQGYNAKVVYNAERNTYRVIASSYDDRAEATQAKEEFKAKYPNRDDFQKAWLLYRVY
3817	GC_00000522		PV2SA01	808	5	5	1	1	1	1	1	COG3087	Cell division protein FtsN (FtsN) (PDB:1UTA)			D	Cell cycle control, cell division, chromosome partitioning	MKKLVVLGMGLCVALAFSSCKSSESAYKKAYEKAKQQELAEAPADQVEATPVEAAPVVSAPVTTAPVAGPVREEKVELVSGDGLKAYSVVCGSFGVKANAEGLKQYLDGQGYNAKVVYNAERNTYRVIASSYDDRAEATQAKEEFKAKYPNRDDFQKAWLLYRVY
3818	GC_00000522		PV2SA02	1483	5	5	1	1	1	1	1	COG3087	Cell division protein FtsN (FtsN) (PDB:1UTA)			D	Cell cycle control, cell division, chromosome partitioning	MKKLVVLGMGLCVALAFSSCKSSESAYKKAYEKAKQQELAEAPADQVEATPVEAAPVVSAPVTTAPVAGPVREEKVELVSGDGLKAYSVVCGSFGVKANAEGLKQYLDGQGYNAKVVYNAERNTYRVIASSYDDRAEATQAKEEFKAKYPNRDDFQKAWLLYRVY
3894	GC_00000538		PV10SA01	1093	5	5	1	1	1	1	1	COG1475	Chromosome segregation protein Spo0J, contains ParB-like nuclease domain (Spo0J) (PDB:1R71)			D	Cell cycle control, cell division, chromosome partitioning	MKEEFESPVYHVHRVPVEKVRANSYNPNHVAAPEMKLLELSIWEDGYTMPCVCYYIPDEDIYELVDGYHRYCVLKTSKRVFEREKGLLPVVVIEKDLSNRMASTIRHNRARGTHSIELMVDIVAELTKAGMSDEWIKKNIGMDADELLRLKQISGLMELFADREFTIPEP
3895	GC_00000538		PV26FA01	984	5	5	1	1	1	1	1	COG1475	Chromosome segregation protein Spo0J, contains ParB-like nuclease domain (Spo0J) (PDB:1R71)			D	Cell cycle control, cell division, chromosome partitioning	MKEEFESPVYHVHRVPVEKVRANSYNPNHVAAPEMKLLELSIWEDGYTMPCVCYYIPDEDIYELVDGYHRYCVLKTSKRVFEREKGLLPVVVIEKDLSNRMASTIRHNRARGTHSIELMVDIVAELTKAGMSDEWIKKNIGMDADELLRLKQISGLMELFADREFTIPEP
3896	GC_00000538		PV29FA01	2601	5	5	1	1	1	1	1	COG1475	Chromosome segregation protein Spo0J, contains ParB-like nuclease domain (Spo0J) (PDB:1R71)			D	Cell cycle control, cell division, chromosome partitioning	MKEEFESPVYHVHRVPVEKVRANSYNPNHVAAPEMKLLELSIWEDGYTMPCVCYYIPDEDIYELVDGYHRYCVLKTSKRVFEREKGLLPVVVIEKDLSNRMASTIRHNRARGTHSIELMVDIVAELTKAGMSDEWIKKNIGMDADELLRLKQISGLMELFADREFTIPEP
3897	GC_00000538		PV2SA01	380	5	5	1	1	1	1	1	COG1475	Chromosome segregation protein Spo0J, contains ParB-like nuclease domain (Spo0J) (PDB:1R71)			D	Cell cycle control, cell division, chromosome partitioning	MKEEFESPVYHVHRVPVEKVRANSYNPNHVAAPEMKLLELSIWEDGYTMPCVCYYIPDEDIYELVDGYHRYCVLKTSKRVFEREKGLLPVVVIEKDLSNRMASTIRHNRARGTHSIELMVDIVAELTKAGMSDEWIKKNIGMDADELLRLKQISGLMELFADREFTIPEP
3898	GC_00000538		PV2SA02	1055	5	5	1	1	1	1	1	COG1475	Chromosome segregation protein Spo0J, contains ParB-like nuclease domain (Spo0J) (PDB:1R71)			D	Cell cycle control, cell division, chromosome partitioning	MKEEFESPVYHVHRVPVEKVRANSYNPNHVAAPEMKLLELSIWEDGYTMPCVCYYIPDEDIYELVDGYHRYCVLKTSKRVFEREKGLLPVVVIEKDLSNRMASTIRHNRARGTHSIELMVDIVAELTKAGMSDEWIKKNIGMDADELLRLKQISGLMELFADREFTIPEP
4209	GC_00000601		PV10SA01	2997	5	5	1	1	1	1	1	COG1729	Cell division protein CpoB, coordinates peptidoglycan biosynthesis and outer membrane constriction (CpoB) (PDB:2WZ7) (PUBMED:25951518)			D	Cell cycle control, cell division, chromosome partitioning	MAEQKHTQDPLDMEEALSTSEAFLIKYKGRILGTIAAVVIIIAGFMGYKHFISDPNEVKASEALFKGEQYFGADNFETALNGDSIGYKGFLKVADEFSGTAAGNLANAYAGICYAQLGKYEDAVKYLDKFSAKDQLVSPAILGTIGNCYAEMGQLDKAAGTLLKAADKADSQALSPIYLIQAGQLFEKLGKNSEAVKAYTLVKEKYFNSYQSMDIDKYIERASIK
4210	GC_00000601		PV26FA01	3293	5	5	1	1	1	1	1	COG1729	Cell division protein CpoB, coordinates peptidoglycan biosynthesis and outer membrane constriction (CpoB) (PDB:2WZ7) (PUBMED:25951518)			D	Cell cycle control, cell division, chromosome partitioning	MAEQKHTQDPLDMEEALSTSEAFLIKYKGRILGTIAAVVIIIAGFMGYKHFISDPNEVKASEALFKGEQYFGADNFETALNGDSIGYKGFLKVADEFSGTAAGNLANAYAGICYAQLGKYEDAVKYLDKFSAKDQLVSPAILGTIGNCYAEMGQLDKAAGTLLKAADKADSQALSPIYLIQAGQLFEKLGKNSEAVKAYTLVKEKYFNSYQSMDIDKYIERASIK
4211	GC_00000601		PV29FA01	465	5	5	1	1	1	1	1	COG1729	Cell division protein CpoB, coordinates peptidoglycan biosynthesis and outer membrane constriction (CpoB) (PDB:2WZ7) (PUBMED:25951518)			D	Cell cycle control, cell division, chromosome partitioning	MAEQKHTQDPLDMEEALSTSEAFLIKYKGRILGTIAAVVIIIAGFMGYKHFISDPNEVKASEALFKGEQYFGADNFETALNGDSIGYKGFLKVADEFSGTAAGNLANAYAGICYAQLGKYEDAVKYLDKFSAKDQLVSPAILGTIGNCYAEMGQLDKAAGTLLKAADKADSQALSPIYLIQAGQLFEKLGKNSEAVKAYTLVKEKYFNSYQSMDIDKYIERASIK
4212	GC_00000601		PV2SA01	2150	5	5	1	1	1	1	1	COG1729	Cell division protein CpoB, coordinates peptidoglycan biosynthesis and outer membrane constriction (CpoB) (PDB:2WZ7) (PUBMED:25951518)			D	Cell cycle control, cell division, chromosome partitioning	MAEQKHTQDPLDMEEALSTSEAFLIKYKGRILGTIAAVVIIIAGFMGYKHFISDPNEVKASEALFKGEQYFGADNFETALNGDSIGYKGFLKVADEFSGTAAGNLANAYAGICYAQLGKYEDAVKYLDKFSAKDQLVSPAILGTIGNCYAEMGQLDKAAGTLLKAADKADSQALSPIYLIQAGQLFEKLGKNSEAVKAYTLVKEKYFNSYQSMDIDKYIERASIK
4213	GC_00000601		PV2SA02	2825	5	5	1	1	1	1	1	COG1729	Cell division protein CpoB, coordinates peptidoglycan biosynthesis and outer membrane constriction (CpoB) (PDB:2WZ7) (PUBMED:25951518)			D	Cell cycle control, cell division, chromosome partitioning	MAEQKHTQDPLDMEEALSTSEAFLIKYKGRILGTIAAVVIIIAGFMGYKHFISDPNEVKASEALFKGEQYFGADNFETALNGDSIGYKGFLKVADEFSGTAAGNLANAYAGICYAQLGKYEDAVKYLDKFSAKDQLVSPAILGTIGNCYAEMGQLDKAAGTLLKAADKADSQALSPIYLIQAGQLFEKLGKNSEAVKAYTLVKEKYFNSYQSMDIDKYIERASIK
4354	GC_00000630		PV10SA01	3343	5	5	1	1	1	1	1	COG2919	Cell division protein FtsB (FtsB) (PDB:4IFF)			D	Cell cycle control, cell division, chromosome partitioning	MSKLLTIWNYIRRHKYMITVLIFIVVIGFLDENSLIQRVKHRSEISALNSEIEKYRKQYEEDTEKLKELTTNPEALEKIAREKYLMKKPDEDIFVFEE
4355	GC_00000630		PV26FA01	2820	5	5	1	1	1	1	1	COG2919	Cell division protein FtsB (FtsB) (PDB:4IFF)			D	Cell cycle control, cell division, chromosome partitioning	MSKLLTIWNYIRRHKYMITVLIFIVVIGFLDENSLIQRVKHRSEISALNSEIEKYRKQYEEDTEKLKELTTNPEALEKIAREKYLMKKPDEDIFVFEE
4356	GC_00000630		PV29FA01	80	5	5	1	1	1	1	1	COG2919	Cell division protein FtsB (FtsB) (PDB:4IFF)			D	Cell cycle control, cell division, chromosome partitioning	MSKLLTIWNYIRRHKYMITVLIFIVVIGFLDENSLIQRVKHRSEISALNSEIEKYRKQYEEDTEKLKELTTNPEALEKIAREKYLMKKPDEDIFVFEE
4357	GC_00000630		PV2SA01	2575	5	5	1	1	1	1	1	COG2919	Cell division protein FtsB (FtsB) (PDB:4IFF)			D	Cell cycle control, cell division, chromosome partitioning	MSKLLTIWNYIRRHKYMITVLIFIVVIGFLDENSLIQRVKHRSEISALNSEIEKYRKQYEEDTEKLKELTTNPEALEKIAREKYLMKKPDEDIFVFEE
4358	GC_00000630		PV2SA02	3250	5	5	1	1	1	1	1	COG2919	Cell division protein FtsB (FtsB) (PDB:4IFF)			D	Cell cycle control, cell division, chromosome partitioning	MSKLLTIWNYIRRHKYMITVLIFIVVIGFLDENSLIQRVKHRSEISALNSEIEKYRKQYEEDTEKLKELTTNPEALEKIAREKYLMKKPDEDIFVFEE
[truncated: 19,045 more rows]
