# Supplementary material for: The gut microbiota modulates the rate of ALS progression
Source: Research Square preprint supplement (doi:10.21203/rs.3.rs-6370840/v1), 2025-04-17
Supplement: Supplementary file 3 [file 5db5a41c8c7f057bf0bf16da.xlsx]

## Sheet: ALS metadata
Extended data Table 1. Metadata associated with the human samples in this study.
Subject ID	Matrix	Sample Description	Group Name	Sex	Age	BMI	Race / Ethnicity	Site of Onset	Diet	Bristol scale	is it a reversal?	Family History	Known mutation	Mutated gene or mutation	Is taking riluzole?	Is taking radicava?
MB01	fresh stool	ALS patient frozen stool	Stool Slow Progression	Female	78	21.9	White	Limb	Regular American	2	no	no	no		yes	no
MB02	fresh stool	ALS patient frozen stool	Stool Slow Progression	Male	59	34	White	Bulbar	Regular American	1	no	no	no		yes	no
MB06	fresh stool	ALS patient frozen stool	Stool Slow Progression	Female	54	29.9	White	Limb	Regular American	4	no	no	no		no	no
MB07	fresh stool	ALS patient frozen stool	Stool Slow Progression	Male	70	29.7	White	Limb	Regular American	4	no	no	no		no	no
MB09	fresh stool	ALS patient frozen stool	Stool Slow Progression	Male	53	25	White	Limb	Regular American	5	no	no	no		no	no
MB10	fresh stool	ALS patient frozen stool	Stool Slow Progression	Male	46	24.6	White	Limb	Regular American	3	no	no	no		yes	no
MB12	fresh stool	ALS patient frozen stool	Stool Slow Progression	Female	64	20.2	White	Limb	Regular American	5	no	yes	no		yes	no
MB13	fresh stool	ALS patient frozen stool	Stool Slow Progression	Female	64	24.5	White	Limb	Regular American	3	no	no	no		no	no
MB14	fresh stool	ALS patient frozen stool	Stool Slow Progression	Male	70	24.8	White	Limb	Regular American	3	no	no	no		yes	no
MB20	fresh stool	ALS patient frozen stool	Stool Slow Progression	Male	61	30.5	White	Limb	Regular American	4	no	no	no		yes	no
MB23	fresh stool	ALS patient frozen stool	Stool Slow Progression	Male	40	26.1	White	Limb	Regular American	3 and 5	no	No	No		Yes	no
MB26	fresh stool	ALS patient frozen stool	Stool Fast Progression	Male	70	33	White	Limb	Regular American	5.5	no	No	No		Yes	no
MB27	fresh stool	ALS patient frozen stool	Stool Fast Progression	Female	56	28.6	Unknown	Bulbar	Tube feeds	6.5	no	No	No		Yes	no
MB29	fresh stool	ALS patient frozen stool	Stool Fast Progression	Male	63	18	White	Other	Regular American	3	no	No	No		Yes	no
MB38	fresh stool	ALS patient frozen stool	Stool Fast Progression	Female	65	22	White	Bulbar	Regular American and Tube feeds	5	no	no	no		no	no
MB42	fresh stool	ALS patient frozen stool	Stool Fast Progression	Male	75	21.1	White	Limb	Regular American	5.5	no	yes	no		yes	no
MB43	fresh stool	ALS patient frozen stool	Stool Fast Progression	Female	65	18.2	White	Bulbar	Other unusual diet	5	no	no	yes	VUS in DCTN1	no	no
MB44	fresh stool	ALS patient frozen stool	Stool Fast Progression	Female	44	28	White	Bulbar	Regular American	1.5	no	no	yes	TARDBP	yes	no
MB51	fresh stool	ALS patient frozen stool	Stool Slow Progression	Male	76	28.9	Black or African American	Limb	Regular American	3	yes	no	no		yes	no
MB55	fresh stool	ALS patient frozen stool	Stool Slow Progression	Male	72	Not available	White	Limb	Regular American	4.5	yes	no	no		no	no
MB01	mailed stool	ALS patient stool with preservative	Mailed Stool Slow Progression	Female	78	21.9	White	Limb	Regular American		no	no	no		yes	no
MB02	mailed stool	ALS patient stool with preservative	Mailed Stool Slow Progression	Male	59	34	White	Bulbar	Regular American		no	no	no		yes	no
MB03	mailed stool	ALS patient stool with preservative	Mailed Stool Slow Progression	Male	57	25.1	Black or African American	Limb	Regular American		no	no	no		no	no
MB06	mailed stool	ALS patient stool with preservative	Mailed Stool Slow Progression	Female	54	29.9	White	Limb	Regular American		no	no	no		no	no
MB08	mailed stool	ALS patient stool with preservative	Mailed Stool Slow Progression	Male	76	38.9	White	Limb	Regular American		no	no	no		no	no
MB09	mailed stool	ALS patient stool with preservative	Mailed Stool Slow Progression	Male	53	25	White	Limb	Regular American		no	no	no		no	no
MB10	mailed stool	ALS patient stool with preservative	Mailed Stool Slow Progression	Male	46	24.6	White	Limb	Regular American		no	no	no		yes	no
MB11	mailed stool	ALS patient stool with preservative	Mailed Stool Slow Progression	Female	63	24.9	White	Limb	Regular American		no	no	no		no	no
MB12	mailed stool	ALS patient stool with preservative	Mailed Stool Slow Progression	Female	64	20.2	White	Limb	Regular American		no	yes	no		yes	no
MB14	mailed stool	ALS patient stool with preservative	Mailed Stool Slow Progression	Male	70	24.8	White	Limb	Regular American		no	no	no		yes	no
MB15	mailed stool	ALS patient stool with preservative	Mailed Stool Slow Progression	Male	53	37.1	White	Limb	Regular American		no	no	no		no	no
MB16	mailed stool	ALS patient stool with preservative	Mailed Stool Slow Progression	Male	58	28.4	White	Limb	Regular American		no	no	no		yes	no
MB17	mailed stool	ALS patient stool with preservative	Mailed Stool Slow Progression	Male	38	47.5	White	Limb	Regular American		no	no	yes	SOD1	yes	no
MB18	mailed stool	ALS patient stool with preservative	Mailed Stool Slow Progression	Male	77	25.4	White	Bulbar	Regular American		no	no	no		yes	no
MB19	mailed stool	ALS patient stool with preservative	Mailed Stool Slow Progression	Male	55	25.2	White	Limb	Regular American		no	no	no		yes	no
MB20	mailed stool	ALS patient stool with preservative	Mailed Stool Slow Progression	Male	61	30.5	White	Limb	Regular American		no	no	no		yes	no
MB21	mailed stool	ALS patient stool with preservative	Mailed Stool Slow Progression	Male	33	30.7	White	Limb	Regular American		no	Yes	Yes	SOD1	Yes	no
MB22	mailed stool	ALS patient stool with preservative	Mailed Stool Slow Progression	Female	70	19.8	White	Bulbar	Regular American		no	No	No		Yes	no
MB23	mailed stool	ALS patient stool with preservative	Mailed Stool Slow Progression	Male	40	26.1	White	Limb	Regular American		no	No	No		Yes	no
MB24	mailed stool	ALS patient stool with preservative	Mailed Stool Slow Progression	Female	69	20.2	White	Limb	Regular American		no	No	No		Yes	no
MB26	mailed stool	ALS patient stool with preservative	Mailed Stool Fast Progression	Male	70	33	White	Limb	Regular American		no	No	No		Yes	no
MB27	mailed stool	ALS patient stool with preservative	Mailed Stool Fast Progression	Female	56	28.6	Unknown	Bulbar	Tube feeds		no	No	No		Yes	no
MB30	mailed stool	ALS patient stool with preservative	Mailed Stool Fast Progression	Female	62	30.1	White	Bulbar	Regular American and Tube feeds		no	no	no		yes	no
MB34	mailed stool	ALS patient stool with preservative	Mailed Stool Fast Progression	Female	55	21.4	White	Limb	Regular American		no	no	no		yes	no
MB38	mailed stool	ALS patient stool with preservative	Mailed Stool Fast Progression	Female	65	22	White	Bulbar	Regular American and Tube feeds		no	no	no		no	no
MB40	mailed stool	ALS patient stool with preservative	Mailed Stool Slow Progression	Female	57	24.1	White	Limb	Tube feeds		no	no	no		yes	no
MB42	mailed stool	ALS patient stool with preservative	Mailed Stool Fast Progression	Male	75	21.1	White	Limb	Regular American		no	yes	no		yes	no
MB43	mailed stool	ALS patient stool with preservative	Mailed Stool Fast Progression	Female	65	18.2	White	Bulbar	Other unusual diet		no	no	yes	VUS in DCTN1	no	no
MB44	mailed stool	ALS patient stool with preservative	Mailed Stool Fast Progression	Female	44	28	White	Bulbar	Regular American		no	no	yes	TARDBP	yes	no
MB47	mailed stool	ALS patient stool with preservative	Mailed Stool Fast Progression	Female	62	24.4	Native American or Alaska Native	Limb	Regular American		no	no	no		yes	no
MB51	mailed stool	ALS patient stool with preservative	Mailed Stool Reversal	Male	76	28.9	Black or African American	Limb	Regular American		yes	no	no		yes	no
MB52	mailed stool	ALS patient stool with preservative	Mailed Stool Reversal	Male	74	Not available	White	Limb	Other unusual diet		yes	no	no		no	no
MB53	mailed stool	ALS patient stool with preservative	Mailed Stool Reversal	Male	57	Not available	White	Limb	NA		yes	yes	no		yes	no
MB54	mailed stool	ALS patient stool with preservative	Mailed Stool Reversal	Female	66	Not available	White	Limb	Regular American		yes	no	no		yes	yes
MB55	mailed stool	ALS patient stool with preservative	Mailed Stool Reversal	Male	72	Not available	White	Limb	Regular American		yes	no	no		no	no
MB56	mailed stool	ALS patient stool with preservative	Mailed Stool Reversal	Male	71	Not available	White	Limb	Vegan		yes	no	no		no	no
MB59	mailed stool	ALS patient stool with preservative	Mailed Stool Reversal	Female	80	Not available	White	Limb	Regular American		yes	Unknown	no		no	no
MB60	mailed stool	ALS patient stool with preservative	Mailed Stool Reversal	Male	70	Not available	White	Limb	Regular American		yes	no	no		no	no
MB61	mailed stool	ALS patient stool with preservative	Mailed Stool Reversal	Male	53	Not available	Unknown or Not Reported	Limb	Regular American		yes	no	no		no	no
MB63	mailed stool	ALS patient stool with preservative	Mailed Stool Reversal	Female	71	Not available	White	Limb	Regular American and High fat, low carb		yes	no	no		no	no
MB65	mailed stool	ALS patient stool with preservative	Mailed Stool Reversal	Male	56	27.9	White	Limb	Regular American		yes	no	no		no	no
MB02	saliva	ALS patient saliva	Saliva Slow Progression	Male	59	34	White	Bulbar	Regular American		no	no	no		yes	no
MB03	saliva	ALS patient saliva	Saliva Slow Progression	Male	57	25.1	Black or African American	Limb	Regular American		no	no	no		no	no			15
MB04	saliva	ALS patient saliva	Saliva Slow Progression	Male	67	31	White	Limb	Regular American		no	yes	no		no	no
MB05	saliva	ALS patient saliva	Saliva Slow Progression	Female	64	33.6	Black or African American	Limb	Regular American		no	Unknown	no		no	no
MB06	saliva	ALS patient saliva	Saliva Slow Progression	Female	54	29.9	Black or African American	Limb	Regular American		no	Unknown	no		no	no
MB07	saliva	ALS patient saliva	Saliva Slow Progression	Male	70	29.7	White	Limb	Regular American		no	no	no		no	no
MB08	saliva	ALS patient saliva	Saliva Slow Progression	Male	76	38.9	White	Limb	Regular American		no	no	no		no	no
MB09	saliva	ALS patient saliva	Saliva Slow Progression	Male	53	25	White	Limb	Regular American		no	no	no		no	no
MB10	saliva	ALS patient saliva	Saliva Slow Progression	Male	46	24.6	White	Limb	Regular American		no	no	no		yes	no
MB11	saliva	ALS patient saliva	Saliva Slow Progression	Female	63	24.9	White	Limb	Regular American		no	no	no		no	no
MB12	saliva	ALS patient saliva	Saliva Slow Progression	Female	64	20.2	White	Limb	Regular American		no	yes	no		yes	no
MB13	saliva	ALS patient saliva	Saliva Slow Progression	Female	64	24.5	White	Limb	Regular American		no	no	no		no	no
MB14	saliva	ALS patient saliva	Saliva Slow Progression	Male	70	24.8	White	Limb	Regular American		no	no	no		yes	no
MB15	saliva	ALS patient saliva	Saliva Slow Progression	Male	53	37.1	White	Limb	Regular American		no	no	no		no	no
MB16	saliva	ALS patient saliva	Saliva Slow Progression	Male	58	28.4	White	Limb	Regular American		no	no	no		yes	no
MB17	saliva	ALS patient saliva	Saliva Slow Progression	Male	38	47.5	White	Limb	Regular American		no	no	yes	SOD1	yes	no
MB19	saliva	ALS patient saliva	Saliva Slow Progression	Male	55	25.2	White	Limb	Regular American		no	no	no		yes	no
MB20	saliva	ALS patient saliva	Saliva Slow Progression	Male	61	30.5	White	Limb	Regular American		no	no	no		yes	no
MB21	saliva	ALS patient saliva	Saliva Slow Progression	Male	33	30.7	White	Limb	Regular American		no	Yes	Yes	SOD1	Yes	no
MB22	saliva	ALS patient saliva	Saliva Slow Progression	Female	70	19.8	White	Bulbar	Regular American		no	No	No		Yes	no
MB23	saliva	ALS patient saliva	Saliva Slow Progression	Male	40	26.1	White	Limb	Regular American		no	No	No		Yes	no
MB24	saliva	ALS patient saliva	Saliva Slow Progression	Female	69	20.2	White	Limb	Regular American		no	No	No		Yes	no
MB26	saliva	ALS patient saliva	Saliva Fast Progression	Male	70	33	White	Limb	Regular American		no	No	No		Yes	no
MB27	saliva	ALS patient saliva	Saliva Fast Progression	Female	56	28.6	Unknown	Bulbar	Tube feeds		no	No	No		Yes	no
MB28	saliva	ALS patient saliva	Saliva Fast Progression	Male	70	19.2	White	Limb	Tube feeds		no	Yes	No		Yes	no
MB30	saliva	ALS patient saliva	Saliva Fast Progression	Female	62	30.1	White	Bulbar	Regular American and Tube feeds		no	no	no		yes	no
MB34	saliva	ALS patient saliva	Saliva Fast Progression	Female	55	21.4	White	Limb	Regular American		no	no	no		yes	no
MB38	saliva	ALS patient saliva	Saliva Fast Progression	Female	65	22	White	Bulbar	Regular American and Tube feeds		no	no	no		no	no
MB40	saliva	ALS patient saliva	Saliva Slow Progression	Female	57	24.1	White	Limb	Tube feeds		no	no	no		yes	no
MB42	saliva	ALS patient saliva	Saliva Fast Progression	Male	75	21.1	White	Limb	Regular American		no	yes	no		yes	no
MB43	saliva	ALS patient saliva	Saliva Fast Progression	Female	65	18.2	White	Bulbar	Other unusual diet		no	no	yes	VUS in DCTN1	no	no
MB44	saliva	ALS patient saliva	Saliva Fast Progression	Female	44	28	White	Bulbar	Regular American		no	no	yes	TARDBP	yes	no
MB47	saliva	ALS patient saliva	Saliva Fast Progression	Female	62	24.4	Native American or Alaska Native	Limb	Regular American		no	no	no		yes	no
MB51	saliva	ALS patient saliva	Saliva Reversal Progression	Male	76	28.9	Black or African American	Limb	Regular American		yes	no	no		yes	no
MB52	saliva	ALS patient saliva	Saliva Reversal Progression	Male	74	Not available	White	Limb	Other unusual diet		yes	no	no		no	no
MB53	saliva	ALS patient saliva	Saliva Reversal Progression	Male	57	Not available	White	Limb	NA		yes	yes	no		yes	no
MB54	saliva	ALS patient saliva	Saliva Reversal Progression	Female	66	Not available	White	Limb	Regular American		yes	no	no		yes	yes
MB55	saliva	ALS patient saliva	Saliva Reversal Progression	Male	72	Not available	White	Limb	Regular American		yes	no	no		no	no
MB56	saliva	ALS patient saliva	Saliva Reversal Progression	Male	71	Not available	White	Limb	Vegan		yes	no	no		no	no
MB58	saliva	ALS patient saliva	Saliva Reversal Progression	Male	89	Not available	White	Limb	NA		yes	no	no		no	no
MB59	saliva	ALS patient saliva	Saliva Reversal Progression	Female	80	Not available	White	Limb	Regular American		yes	Unknown	no		no	no
MB60	saliva	ALS patient saliva	Saliva Reversal Progression	Male	70	Not available	White	Limb	Regular American		yes	no	no		no	no
MB63	saliva	ALS patient saliva	Saliva Reversal Progression	Female	71	Not available	White	Limb	Regular American and High fat, low carb		yes	no	no		no	no
MB65	saliva	ALS patient saliva	Saliva Reversal Progression	Male	56	27.9	White	Limb	Regular American		yes	no	no		no	no
MB01	serum	ALS patient serum	Serum Slow Progression	Female	78	21.9	White	Limb	Regular American		no	no	no		yes	no
MB02	serum	ALS patient serum	Serum Slow Progression	Male	59	34	White	Bulbar	Regular American		no	no	no		yes	no
MB04	serum	ALS patient serum	Serum Slow Progression	Male	67	31	White	Limb	Regular American		no	yes	no		no	no
MB06	serum	ALS patient serum	Serum Slow Progression	Female	54	29.9	White	Limb	Regular American		no	no	no		no	no
MB07	serum	ALS patient serum	Serum Slow Progression	Male	70	29.7	White	Limb	Regular American		no	no	no		no	no
MB09	serum	ALS patient serum	Serum Slow Progression	Male	53	25	White	Limb	Regular American		no	no	no		no	no
MB10	serum	ALS patient serum	Serum Slow Progression	Male	46	24.6	White	Limb	Regular American		no	no	no		yes	no
MB11	serum	ALS patient serum	Serum Slow Progression	Female	63	24.9	White	Limb	Regular American		no	no	no		no	no
MB13	serum	ALS patient serum	Serum Slow Progression	Female	64	24.2	White	Limb	Regular American		no	no	no		no	no
MB14	serum	ALS patient serum	Serum Slow Progression	Male	70	24.8	White	Limb	Regular American		no	no	no		yes	no
MB15	serum	ALS patient serum	Serum Slow Progression	Male	53	37.1	White	Limb	Regular American		no	no	no		no	no
MB16	serum	ALS patient serum	Serum Slow Progression	Male	58	28.4	White	Limb	Regular American		no	no	no		yes	no
MB18	serum	ALS patient serum	Serum Slow Progression	Male	77	25.4	White	Bulbar	Regular American		no	no	no		yes	no
MB19	serum	ALS patient serum	Serum Slow Progression	Male	55	25.2	White	Limb	Regular American		no	no	no		yes	no
MB20	serum	ALS patient serum	Serum Slow Progression	Male	61	30.5	White	Limb	Regular American		no	no	no		yes	no
MB21	serum	ALS patient serum	Serum Slow Progression	Male	33	30.7	White	Limb	Regular American		no	Yes	Yes	SOD1	Yes	no
MB22	serum	ALS patient serum	Serum Slow Progression	Female	70	19.8	White	Bulbar	Regular American		no	No	No		Yes	no
MB23	serum	ALS patient serum	Serum Slow Progression	Male	40	26.1	White	Limb	Regular American		no	No	No		Yes	no
MB24	serum	ALS patient serum	Serum Slow Progression	Female	69	20.2	White	Limb	Regular American		no	No	No		Yes	no
MB25	serum	ALS patient serum	Serum Fast Progression	Male	52	36.9	White	Limb	Regular American		no	No	Yes	OPTN	No	no
MB26	serum	ALS patient serum	Serum Fast Progression	Male	70	33	White	Limb	Regular American		no	No	No		Yes	no
MB27	serum	ALS patient serum	Serum Fast Progression	Female	56	28.6	Unknown	Bulbar	Tube feeds		no	No	No		Yes	no
MB28	serum	ALS patient serum	Serum Fast Progression	Male	70	19.2	White	Limb	Tube feeds		no	Yes	No		Yes	no
MB29	serum	ALS patient serum	Serum Fast Progression	Male	63	18	White	Other	Regular American		no	No	No		Yes	no
MB30	serum	ALS patient serum	Serum Fast Progression	Female	62	30.1	White	Bulbar	Regular American and Tube feeds		no	no	no		yes	no
MB31	serum	ALS patient serum	Serum Fast Progression	Male	60	19	White	Limb	High fat, low carb		no	no	no		no	no
MB37	serum	ALS patient serum	Serum Fast Progression	Female	67	38.4	White	Limb	Regular American		no	yes	no		yes	no
MB38	serum	ALS patient serum	Serum Fast Progression	Female	65	22	White	Bulbar	Regular American and Tube feeds		no	no	no		no	no
MB41	serum	ALS patient serum	Serum Fast Progression	Female	45	28.1	Asian	Limb	Regular American		no	no	no		no	no
MB42	serum	ALS patient serum	Serum Fast Progression	Male	75	21.1	White	Limb	Regular American		no	yes	no		yes	no
MB43	serum	ALS patient serum	Serum Fast Progression	Female	65	18.2	White	Bulbar	Other unusual diet		no	no	yes	VUS in DCTN1	no	no
MB44	serum	ALS patient serum	Serum Fast Progression	Female	44	28	White	Bulbar	Regular American		no	no	yes	TARDBP	yes	no
MB45	serum	ALS patient serum	Serum Fast Progression	Female	66	19.2	White	Limb	Regular American		no	no	yes		no	no
MB51	serum	ALS patient serum	Serum Slow Progression	Male	76	28.9	Black or African American	Limb	Regular American		yes	no	no		yes	no
MB55	serum	ALS patient serum	Serum Slow Progression	Male	72	Not available	White	Limb	Regular American		yes	no	no		no	no
