# Supplementary material for: The gut microbiota modulates the rate of ALS progression
Source: Research Square preprint supplement (doi:10.21203/rs.3.rs-6370840/v1), 2025-04-17
Supplement: Supplementary file 4 [file 79308f6b939e58a624a35a27.xlsx]

## Sheet: A-top30
	Extended data Table 2: a. Top 30 metabolites with the most robust difference (i.e., p-value rank order) for the main effect of ALS progression (all slow versus all fast ALS progression) for human serum samples. The ratio is colored in pink for metabolites enriched in slow and in green for metabolites enriched in fast progression. Bold figures indicate significant differences. For the sex-specific…
	Super Pathway	Sub Pathway	Biochemical Name	SLOW/FAST	p-value	S/F Females	S/F Males
	Xenobiotics	Drug - Analgesics, Anesthetics	salicyluric glucuronide*	45.0033	0.0032	69.95	4.75
	Xenobiotics	Drug - Topical Agents	salicylate	18.7374	0.0028	21.99	3.22
	Xenobiotics	Food Component/Plant	2,3-dihydroxyisovalerate	3.69584	0.0009	9.25	1.84
	Xenobiotics	Food Component/Plant	homostachydrine*	5.53432	0.0034	8.64	2.03
	Xenobiotics	Food Component/Plant	piperine	4.08853	0.002	3.23	4.84
	Xenobiotics	Food Component/Plant	sulfate of piperine metabolite C16H19NO3 (2)*	3.29618	0.0032	3.21	3.34
	Xenobiotics	Food Component/Plant	sulfate of piperine metabolite C18H21NO3 (1)*	2.89407	0.0019	2.91	2.89
	Xenobiotics	Food Component/Plant	glucuronide of piperine metabolite C17H21NO3 (5)*	3.30395	0.0039	2.85	3.62
	Peptide	Gamma-glutamyl Amino Acid	gamma-glutamylalanine	1.83727	0.0015	2.17	1.59
	Lipid	Diacylglycerol	myristoyl-linoleoyl-glycerol (14:0/18:2) [1]*	2.26608	0.0045	2.11	2.42
	Amino Acid	Leucine, Isoleucine and Valine Metabolism	2-ketocaprylate	1.82647	0.0015	1.78	1.88
	N/A	N/A	X-10458	1.91425	0.0015	1.69	2.21
	Lipid	Phosphatidylcholine (PC)	1-myristoyl-2-arachidonoyl-GPC (14:0/20:4)*	1.61082	0.0024	1.64	1.58
	Amino Acid	Glutathione Metabolism	5-oxoproline	1.27842	0.0012	1.38	1.17
	Amino Acid	Alanine and Aspartate Metabolism	alanine	1.30556	0.0034	1.26	1.35
	Lipid	Sphingomyelins	sphingomyelin (d18:1/24:1, d18:2/24:0)*	0.821315	0.0011	0.84	0.8
	Lipid	Sphingomyelins	sphingomyelin (d18:2/24:1, d18:1/24:2)*	0.790409	0.0025	0.81	0.77
	Lipid	Fatty Acid Metabolism (Acyl Carnitine, Polyunsaturated)	docosahexaenoylcarnitine (C22:6)*	0.708527	0.003	0.77	0.67
	Lipid	Phospholipid Metabolism	glycerophosphoinositol*	0.632664	0.0026	0.76	0.5
	Lipid	Fatty Acid, Monohydroxy	2-hydroxypalmitate	0.716532	0.0008	0.73	0.71
	Lipid	Lactosylceramides (LCER)	lactosyl-N-nervonoyl-sphingosine (d18:1/24:1)*	0.613727	0.0006	0.7	0.52
	Lipid	Hexosylceramides (HCER)	glycosyl ceramide (d18:2/24:1, d18:1/24:2)*	0.631456	0.0018	0.66	0.6
	N/A	N/A	X-21669	0.442938	0.0018	0.47	0.42
	N/A	N/A	X-25405	0.364477	0.0003	0.41	0.34
	N/A	N/A	X-25395	0.485809	0.0027	0.41	0.55
	N/A	N/A	X-25451	0.462651	0.0039	0.4	0.52
	N/A	N/A	X-25389	0.305059	0.0001	0.37	0.27
	Lipid	Fatty Acid Metabolism (Acyl Carnitine, Dicarboxylate)	suberoylcarnitine (C8-DC)	0.278555	0.0031	0.33	0.24
	N/A	N/A	X-25402	0.181981	0.0003	0.26	0.15
	Lipid	Ketone Bodies	acetoacetate	0.0842384	0.0038	0.03	0.18
						light gray p<0.1
						dark gray p<0.05
						bold significant

## Sheet: Pathway - Heat Map
	Extended data Table 2.b. This heatmap represents the results of the statistical analysis of the human serum-metabolome data. For the sex-specific fold-changes light gray background indicates p<0.1, and dark gray p<0.05. Red and green shaded cells indicate p≤0.05 (red indicates that the mean values are significantly higher for that comparison; green values significantly lower). Light red and light…
	Heat map of statistically significant biochemicals profiled in this study.										Fold of Change									Statistical Values
											2W ANOVA Main Effects				2W ANOVA Contrast					2W ANOVA Main Effects						2W ANOVA Contrast									Mean Values									% Filled Values
											Sex	ALS Progression	Sex: ALS	SLOW_ALS	F_SLOW_ALS	M_SLOW_ALS	M_SLOW_ALS	M_FAST_ALS		Sex		ALS MAIN		Sex: ALS		F_SLOW_ALS		M_SLOW_ALS		M_SLOW_ALS		M_FAST_ALS			FAST	FEMALE	FEMALE_FAST	FEMALE_SLOW	MALE	MALE_FAST	MALE_SLOW	SLOW		FAST	FEMALE	FEMALE_FAST	FEMALE_SLOW	MALE	MALE_FAST
																										F_FAST_ALS		M_FAST_ALS		F_SLOW_ALS		F_FAST_ALS
	Pathway Sort Order	Super Pathway	Sub Pathway	Biochemical Name	Platform	Comp ID	KEGG	HMDB	PUBCHEM	X				FAST_ALS	F_FAST_ALS	M_FAST_ALS	F_SLOW_ALS	F_FAST_ALS	X	p-value	q-value	p-value	q-value	p-value	q-value	p-value	q-value	p-value	q-value	p-value	q-value	p-value	q-value	X									X
	1	Amino Acid	Glycine, Serine and Threonine Metabolism	glycine	LC/MS pos early	58	C00037	HMDB0000123	750					1.11266	1.03	1.22	0.96	0.8		0.218	0.5339	0.3102	0.5304	0.3586	0.9683	0.947	0.9453	0.1509	0.5888	0.8088	0.7794	0.152	0.7608		1.0119	1.1373	1.1229	1.1518	1.0004	0.9008	1.1	1.1259		100	100	100	100	100	100
	2			N-acetylglycine	LC/MS pos early	27710		HMDB0000532	10972					0.584532	0.45	0.77	1.28	0.75		0.7087	0.7761	0.063	0.3368	0.5561	0.9683	0.1005	0.7173	0.3249	0.6862	0.4714	0.6608	0.8847	0.9973		1.6964	1.4039	1.9391	0.8686	1.2842	1.4538	1.1145	0.9916		100	100	100	100	100	100
	5			sarcosine	LC/MS pos early	1516	C00213	HMDB0000271	1088					1.25384	0.95	1.59	1.5	0.9		0.3176	0.623	0.3042	0.5282	0.1382	0.9683	0.7511	0.9224	0.0635	0.4645	0.0663	0.4717	0.7365	0.9875		0.9191	0.9444	0.9684	0.9203	1.1272	0.8698	1.3845	1.1524		100	100	100	100	100	100
	6			dimethylglycine	LC/MS pos early	5086	C03626	HMDB0000092	673					0.886544	0.9	0.87	1.17	1.2		0.1063	0.4075	0.2262	0.4826	0.8923	0.9772	0.4668	0.8715	0.3117	0.6766	0.2609	0.5953	0.2364	0.804		1.1467	0.9901	1.0411	0.9391	1.1733	1.2523	1.0942	1.0166		100	100	100	100	100	100
	7			betaine	LC/MS pos early	3141	C00719	HMDB0000043	247					0.967643	0.83	1.15	1.07	0.76		0.3347	0.6355	0.9654	0.7473	0.0961	0.9683	0.2705	0.7934	0.1965	0.6016	0.5848	0.7146	0.0802	0.7608		1.0384	1.0745	1.177	0.9719	0.9687	0.8997	1.0376	1.0048		100	100	100	100	100	100
	10			serine	LC/MS pos early	1648	C00065	HMDB0000187	5951					1.03444	0.93	1.15	1.05	0.85		0.287	0.6034	0.6043	0.6448	0.1078	0.9683	0.4532	0.8701	0.1123	0.5212	0.6706	0.7408	0.0757	0.7604		0.9988	1.0445	1.0801	1.009	0.9875	0.9175	1.0575	1.0332		100	100	100	100	100	100
	11			N-acetylserine	LC/MS polar	37076		HMDB0002931	65249					1.00221	0.99	1.02	0.96	0.94		0.3205	0.6246	0.8804	0.7313	0.8636	0.9757	0.8289	0.9333	0.9872	0.8587	0.535	0.6854	0.4335	0.8882		0.996	1.0222	1.0276	1.0168	0.972	0.9644	0.9796	0.9982		100	100	100	100	100	100
	16			2-methylserine	LC/MS pos early	53229	C02115		94309					1.053	0.93	1.18	1.27	1		0.6007	0.743	0.7888	0.6989	0.6363	0.9683	0.8903	0.9404	0.579	0.7552	0.4561	0.6573	0.9728	1		0.6925	0.6678	0.6936	0.642	0.7539	0.6914	0.8165	0.7292		36	36	38	33	38	33
	17			threonine	LC/MS pos early	1284	C00188	HMDB0000167	6288					1.18722	1.2	1.18	1.05	1.07		0.4464	0.6926	0.0596	0.335	0.6357	0.9683	0.1127	0.7227	0.2765	0.6561	0.8276	0.7827	0.4083	0.878		0.9449	1.0037	0.9126	1.0948	1.063	0.9772	1.1488	1.1218		100	100	100	100	100	100
	18			N-acetylthreonine	LC/MS neg	33939		HMDB0062557	152204					1.00087	1.03	0.98	1.09	1.14		0.3068	0.6184	0.9511	0.7446	0.7406	0.9752	0.7923	0.9331	0.8396	0.8351	0.6008	0.722	0.3641	0.8621		1.0337	0.9782	0.9655	0.991	1.0901	1.102	1.0782	1.0346		100	100	100	100	100	100
	19			allo-threonine	LC/MS polar	15142	C05519	HMDB0004041	99289					0.912402	1.02	0.82	0.88	1.1		0.7663	0.791	0.621	0.6525	0.4368	0.9683	0.8479	0.9333	0.3418	0.6963	0.7169	0.7511	0.4711	0.8977		1.024	0.9845	0.9762	0.9928	0.9738	1.0718	0.8758	0.9343		100	100	100	100	95	100
	23			O-acetylhomoserine	LC/MS polar	31539	C01077	HMDB0029423	439389					1.18611	1.53	0.95	0.93	1.49		0.1882	0.51	0.3998	0.5779	0.0988	0.9683	0.0965	0.7173	0.5294	0.7393	0.7911	0.7767	0.0495	0.7556		0.9371	0.9518	0.7514	1.1522	1.0968	1.1227	1.0708	1.1115		86	86	75	100	95	100
	29		Alanine and Aspartate Metabolism	alanine	LC/MS pos early	1126	C00041	HMDB0000161	5950					1.30556	1.26	1.35	1.06	0.98		0.8004	0.8012	0.0034	0.1476	0.7079	0.9717	0.0707	0.666	0.0123	0.2838	0.6383	0.7324	0.9347	1		0.8522	0.9707	0.8587	1.0827	0.9941	0.8456	1.1425	1.1126		100	100	100	100	100	100
	31			N-acetylalanine	LC/MS polar	1585	C02847	HMDB0000766	88064					1.04737	1.02	1.08	1.01	0.96		0.6375	0.7553	0.4477	0.5956	0.6506	0.9683	0.8358	0.9333	0.3648	0.6963	0.989	0.8124	0.5359	0.922		0.971	1.0022	0.9929	1.0115	0.9858	0.949	1.0226	1.017		100	100	100	100	100	100
	33			N,N-dimethylalanine	LC/MS pos early	63151			5488191					1.52005	2.17	1.08	0.74	1.49		0.7797	0.7934	0.2875	0.5119	0.2733	0.9683	0.1505	0.743	0.9803	0.8575	0.5366	0.6854	0.3557	0.8621		0.9551	1.2168	0.7668	1.6667	1.1901	1.1433	1.2369	1.4518		100	100	100	100	100	100
	35			N-carbamoylalanine	LC/MS pos early	52340			426409					1.27141	1.23	1.31	1.01	0.95		0.8738	0.8233	0.1571	0.4527	0.9295	0.978	0.3098	0.8134	0.3154	0.6781	0.958	0.8101	0.8682	0.9953		0.8537	0.9777	0.8755	1.0798	0.9614	0.8319	1.091	1.0854		100	100	100	100	100	100
	36			aspartate	LC/MS pos early	443	C00049	HMDB0000191	5960					0.969784	0.73	1.32	1.24	0.68		0.522	0.722	0.7905	0.6989	0.0548	0.9683	0.139	0.7398	0.2045	0.6094	0.3197	0.6143	0.086	0.7608		1.0756	1.1057	1.2797	0.9317	1.0129	0.8715	1.1544	1.0431		100	100	100	100	100	100
	37			N-acetylaspartate (NAA)	LC/MS polar	22185	C01042	HMDB0000812	65065					0.922018	1.03	0.83	0.98	1.21		0.5619	0.743	0.5617	0.6291	0.39	0.9683	0.8495	0.9333	0.2825	0.6561	0.8318	0.7842	0.3356	0.8563		1.0964	1.0073	0.9915	1.0231	1.0999	1.2013	0.9986	1.0109		100	100	100	100	100	100
	40			asparagine	LC/MS pos early	512	C00152	HMDB0000168	6267					1.18856	1.22	1.16	1	1.05		0.7023	0.776	0.0671	0.343	0.76	0.9752	0.1491	0.743	0.2424	0.6444	0.9539	0.81	0.6448	0.955		0.9408	1.0167	0.9179	1.1155	1.0423	0.9638	1.1209	1.1182		100	100	100	100	100	100
	42			N-acetylasparagine	LC/MS pos early	33942		HMDB0006028	99715					0.854624	0.91	0.82	1.21	1.34		0.0911	0.3878	0.3109	0.5304	0.9507	0.978	0.521	0.8888	0.4189	0.7092	0.2167	0.5675	0.2348	0.8037		1.1797	0.9607	1.0071	0.9142	1.2273	1.3523	1.1022	1.0082		100	100	100	100	100	100
	43			hydroxyasparagine**	LC/MS pos early	62060	C20631	HMDB32332	15991574					1.01428	0.98	1.05	1.02	0.95		0.7268	0.7794	0.9169	0.7421	0.6932	0.9717	0.8455	0.9333	0.7083	0.7952	0.9729	0.811	0.6181	0.955		0.9735	0.9893	1.0007	0.9779	0.9717	0.9464	0.9969	0.9874		100	100	100	100	100	100
	46		Glutamate Metabolism	glutamate	LC/MS pos early	57	C00025 C00217	HMDB0000148	33032					1.3414	1.15	1.54	1.31	0.97		0.2216	0.5382	0.0189	0.24	0.4136	0.9683	0.2771	0.7934	0.0188	0.3232	0.1296	0.507	0.7807	0.9875		0.8755	0.9536	0.8887	1.0186	1.0963	0.8623	1.3302	1.1744		100	100	100	100	100	100
	47			glutamine	LC/MS pos early	53	C00064	HMDB0000641	5961					1.03897	1.1	0.98	0.9	1.01		0.4097	0.6679	0.4794	0.6063	0.203	0.9683	0.186	0.7815	0.6641	0.7834	0.1193	0.507	0.7573	0.9875		0.9931	1.0358	0.9872	1.0844	0.9891	0.9991	0.9792	1.0318		100	100	100	100	100	100
	48			alpha-ketoglutaramate*	LC/MS polar	62101	C00940	HMDB0001552	48					1.34779	1.45	1.25	0.9	1.04		0.7191	0.7761	0.0054	0.1631	0.4419	0.9683	0.0168	0.6452	0.1075	0.5212	0.3983	0.6317	0.782	0.9875		0.8416	1.0093	0.8231	1.1955	0.9666	0.8601	1.0731	1.1343		100	100	100	100	100	100
	49			N-acetylglutamate	LC/MS polar	15720	C00624	HMDB0001138	70914					1.31636	1.36	1.29	1.2	1.26		0.2766	0.592	0.0443	0.3072	0.8011	0.9752	0.1251	0.7227	0.177	0.589	0.5269	0.6848	0.3681	0.8621		0.8737	0.9102	0.7729	1.0475	1.1136	0.9745	1.2527	1.1501		100	100	100	100	100	100
	50			N-acetylglutamine	LC/MS polar	33943	C02716	HMDB0006029	182230					1.15129	1.33	0.99	0.84	1.12		0.8288	0.8097	0.2285	0.4828	0.2164	0.9683	0.1049	0.7173	0.9801	0.8575	0.2755	0.6062	0.489	0.8993		0.9789	1.073	0.9219	1.2242	1.0329	1.036	1.0298	1.127		100	100	100	100	100	100
	53			4-hydroxyglutamate	LC/MS pos early	40499	C03079	HMDB0001344	439902					1.20153	0.96	1.4	1.77	1.21		0.1471	0.4767	0.8492	0.7198	0.6313	0.9683	0.8454	0.9333	0.6155	0.7658	0.1493	0.5275	0.5064	0.9077		0.8743	0.7738	0.7902	0.7574	1.1509	0.9583	1.3435	1.0505		100	93	100	83	86	100
	57			N-acetyl-aspartyl-glutamate (NAAG)	LC/MS pos early	35665	C12270	HMDB0001067	188803					0.946748	0.99	0.91	1.05	1.14		0.3694	0.6565	0.6724	0.6688	0.5233	0.9683	0.8844	0.9398	0.4273	0.7092	0.8436	0.7865	0.3045	0.8407		1.0441	0.969	0.9749	0.9631	1.0636	1.1132	1.014	0.9885		100	100	100	100	100	100
	58			beta-citrylglutamate	LC/MS neg	54923	C20775		189741					1.21578	1.24	1.19	1.04	1.08		0.5655	0.743	0.095	0.3809	0.9365	0.978	0.2358	0.7881	0.2275	0.6313	0.7099	0.7483	0.6605	0.9603		0.9709	1.0444	0.9329	1.1558	1.1069	1.0088	1.2049	1.1804		100	100	100	100	100	100
	62			2-pyrrolidinone	LC/MS pos early	31675		HMDB0002039	12025					0.946468	0.91	0.98	1.26	1.16		0.0922	0.3878	0.6617	0.6683	0.6888	0.9717	0.5744	0.9083	0.9777	0.8575	0.1183	0.507	0.378	0.8733		1.0517	0.9284	0.9744	0.8823	1.1187	1.1289	1.1086	0.9954		100	100	100	100	100	100
	64			S-1-pyrroline-5-carboxylate	LC/MS pos early	42370	C04322	HMDB0001301	11966181					1.19393	1.21	1.18	0.86	0.88		0.718	0.7761	0.5106	0.6182	0.7841	0.9752	0.5321	0.8955	0.7723	0.8226	0.6342	0.7324	0.9533	1		0.8178	0.9604	0.8707	1.05	0.8338	0.7649	0.9028	0.9764		50	64	50	83	57	50
	72		Histidine Metabolism	histidine	LC/MS neg	59	C00135	HMDB0000177	6274					1.12661	1.16	1.1	1.04	1.1		0.4646	0.697	0.225	0.4825	0.7505	0.9752	0.3038	0.8104	0.4966	0.7287	0.7552	0.7662	0.4818	0.8977		0.9257	0.9508	0.8812	1.0203	1.0178	0.9702	1.0654	1.0429		100	100	100	100	100	100
	73			1-methylhistidine	LC/MS neg	30460	C01152	HMDB0000001	92105					1.01938	0.99	1.05	0.94	0.88		0.778	0.793	0.6662	0.6683	0.7458	0.9752	0.6126	0.9145	0.9357	0.8506	0.9747	0.811	0.6845	0.9697		0.8567	0.9057	0.9101	0.9013	0.8243	0.8033	0.8452	0.8733		86	64	88	33	62	83
	74			3-methylhistidine	LC/MS neg	15677	C01152	HMDB0000479	64969					1.46133	2.71	1.02	1.05	2.81		0.0728	0.3566	0.1396	0.43	0.6576	0.9683	0.1974	0.785	0.4289	0.7092	0.2986	0.6091	0.1323	0.7608		1.5256	1.4856	0.8013	2.1699	2.2695	2.2499	2.289	2.2294		100	93	100	83	100	100
	75			N-acetylhistidine	LC/MS neg	33946	C02997	HMDB0032055	75619					1.14529	1.14	1.15	0.99	0.98		0.7663	0.791	0.0235	0.2521	0.9895	0.9807	0.122	0.7227	0.082	0.4858	0.8312	0.7842	0.835	0.9953		0.9471	1.0241	0.9558	1.0923	1.0077	0.9384	1.0771	1.0847		100	100	100	100	100	100
	77			N-acetyl-3-methylhistidine*	LC/MS neg	43256		HMDB0240341	193270					1.80778	2.43	1.37	0.8	1.42		0.5187	0.722	0.1478	0.4382	0.3978	0.9683	0.1263	0.7227	0.6414	0.7795	0.879	0.7933	0.3189	0.8429		0.681	0.9642	0.5626	1.3658	0.9479	0.7994	1.0964	1.2311		50	36	25	50	76	83
	79			hydantoin-5-propionate	LC/MS polar	40473	C05565	HMDB0001212	782					0.837935	0.83	0.84	1.02	1.01		0.9331	0.8342	0.3045	0.5282	0.7215	0.9748	0.3536	0.8413	0.6114	0.7645	0.7411	0.7582	0.8548	0.9953		1.2785	1.1684	1.2739	1.0629	1.1814	1.2831	1.0796	1.0713		100	100	100	100	100	100
	80			trans-urocanate	LC/MS pos early	607	C00785	HMDB0000301	736715					1.30501	1.44	1.13	0.59	0.75		0.0098	0.2337	0.1123	0.4088	0.4115	0.9683	0.108	0.7227	0.5519	0.7437	0.0114	0.2852	0.2071	0.7818		1.0908	1.5188	1.2454	1.7921	0.9955	0.9362	1.0548	1.4235		100	100	100	100	100	100
	81			cis-urocanate	LC/MS neg	40410		HMDB0034174	1549103					1.25817	1.48	1.01	0.59	0.87		0.0552	0.333	0.1133	0.4088	0.2748	0.9683	0.0755	0.666	0.7005	0.7923	0.0266	0.4109	0.5592	0.9318		1.1593	1.5366	1.2406	1.8326	1.0813	1.078	1.0845	1.4586		100	100	100	100	100	100
	82			imidazole propionate	LC/MS pos early	40730		HMDB0002271	70630					2.43887	1.55	2.81	4.37	2.41		0.0318	0.3019	0.4214	0.5902	0.8191	0.9752	0.6979	0.9195	0.439	0.7133	0.0725	0.4763	0.1857	0.7651		0.759	0.5674	0.4458	0.6891	2.0426	1.0723	3.013	1.8511		57	29	38	17	81	83
	83			formiminoglutamate	LC/MS pos early	43493	C00439	HMDB0000854	439233					1.63899	1.25	1.89	2.33	1.53		0.1503	0.4841	0.3351	0.5453	0.8362	0.9752	0.6088	0.9145	0.3799	0.6972	0.2161	0.5673	0.402	0.878		1.1465	1.0177	0.9054	1.13	2.0079	1.3875	2.6282	1.8791		79	71	63	83	100	100
	85			imidazole lactate	LC/MS polar	15716	C05568	HMDB0002320	793					1.37227	0.99	1.85	1.5	0.8		0.5024	0.7176	0.0368	0.2939	0.0364	0.9368	0.9972	0.9453	0.0026	0.2381	0.0395	0.4216	0.3194	0.8429		0.844	0.9319	0.9363	0.9274	1.0704	0.7518	1.3891	1.1582		100	100	100	100	100	100
	88			N-acetylcarnosine	LC/MS neg	43488		HMDB0012881	9903482					1.4403	1.09	1.67	2.33	1.53		0.0003	0.0805	0.0702	0.3488	0.2453	0.9683	0.6463	0.9164	0.0287	0.3765	0.0005	0.0685	0.0644	0.7604		0.8676	0.7171	0.6848	0.7494	1.4001	1.0504	1.7497	1.2496		100	100	100	100	100	100
	93			1-methyl-4-imidazoleacetate	LC/MS pos early	32350	C05828	HMDB0002820	75810					0.730977	1.2	0.49	0.77	1.91		0.5805	0.743	0.254	0.499	0.1045	0.9683	0.7346	0.9224	0.0416	0.4259	0.4099	0.6332	0.1446	0.7608		1.2051	0.9115	0.8285	0.9945	1.1745	1.5816	0.7674	0.8809		79	71	75	67	57	83
	94			1-methyl-5-imidazoleacetate	LC/MS pos early	62946		HMDB04988	6451814					1.1286	1.09	1.14	2.78	2.63		0.1015	0.4043	0.8488	0.7198	0.9249	0.978	0.9485	0.9453	0.8308	0.8351	0.191	0.5485	0.2937	0.8359		0.8157	0.4681	0.449	0.4873	1.2682	1.1825	1.3539	0.9206		36	21	25	17	57	50
	95			1-methyl-5-imidazolelactate	LC/MS neg	64596								2.15259	2.23	2.11	1.62	1.71		0.0376	0.3056	0.0193	0.24	0.8362	0.9752	0.1397	0.7398	0.0535	0.438	0.0839	0.5007	0.1974	0.7702		0.5341	0.6351	0.3935	0.8767	1.0487	0.6747	1.4227	1.1497		71	71	63	83	95	83
	99			4-imidazoleacetate	LC/MS pos early	32349	C02835	HMDB0002024	96215					2.39639	2.85	2.18	1.58	2.07		0.4641	0.697	0.2132	0.4771	0.3306	0.9683	0.1397	0.7398	0.8336	0.8351	0.8542	0.7874	0.2548	0.8246		0.5873	0.7373	0.3828	1.0918	1.2574	0.7918	1.723	1.4074		57	57	38	83	67	83
	107		Lysine Metabolism	lysine	LC/MS pos early	1301	C00047 C00739	HMDB0003405	5962					1.10877	1.16	1.06	1	1.09		0.4777	0.7064	0.0886	0.3753	0.3924	0.9683	0.0881	0.6904	0.5092	0.7344	0.9119	0.8002	0.2956	0.8391		0.9433	0.9759	0.9037	1.048	1.0133	0.9828	1.0439	1.0459		100	100	100	100	100	100
	108			N2-acetyllysine	LC/MS polar	36751	C12989	HMDB0000446	92907					1.15163	1.28	1.02	0.78	0.98		0.4443	0.6915	0.3177	0.532	0.5869	0.9683	0.302	0.8104	0.7288	0.8043	0.3285	0.6183	0.8806	0.9959		0.736	0.849	0.7439	0.954	0.7346	0.728	0.7412	0.8476		43	57	50	67	62	33
	109			N6-acetyllysine	LC/MS polar	36752	C02727	HMDB0000206	92832					1.17985	1.22	1.14	0.9	0.97		0.5616	0.743	0.2383	0.4867	0.6934	0.9717	0.2913	0.7952	0.5506	0.7437	0.4657	0.6607	0.9	1		0.9808	1.1074	0.9963	1.2185	1.0307	0.9653	1.096	1.1572		100	100	100	100	100	100
	111			N2-acetyl,N6-methyllysine	LC/MS pos early	62954								0.858547	1.07	0.69	0.8	1.24		0.8399	0.8098	0.8671	0.7278	0.1847	0.9683	0.3141	0.8186	0.3798	0.6972	0.3938	0.6317	0.3033	0.8407		1.1905	1.1007	1.0652	1.1361	1.112	1.3158	0.9081	1.0221		71	71	50	100	81	100
	112			N2-acetyl,N6,N6-dimethyllysine	LC/MS pos early	63254								0.72345	0.86	0.58	0.65	0.96		0.3727	0.6565	0.6536	0.6683	0.4771	0.9683	0.8592	0.9338	0.3858	0.6979	0.2323	0.5832	0.9022	1		1.4793	1.4022	1.5057	1.2987	1.1473	1.4529	0.8416	1.0702		79	86	75	100	76	83
	116			N6-methyllysine	LC/MS pos early	62860	C02728	HMDB0002038	164795					1.09124	1.15	1.03	0.94	1.05		0.9966	0.838	0.6941	0.678	0.9416	0.978	0.7543	0.9251	0.8101	0.8306	0.9537	0.81	0.9631	1		1.3317	1.4001	1.3009	1.4992	1.3848	1.3625	1.4072	1.4532		100	100	100	100	100	100
	117			N6,N6-dimethyllysine	LC/MS pos early	62862	C05545	HMDB0013287	193344					0.902258	0.97	0.84	0.92	1.06		0.8366	0.8098	0.7617	0.6959	0.8156	0.9752	0.9624	0.9453	0.6876	0.787	0.9838	0.8124	0.7682	0.9875		0.8062	0.771	0.7837	0.7582	0.7626	0.8286	0.6967	0.7274		86	79	88	67	86	83
	118			N6,N6,N6-trimethyllysine	LC/MS pos early	1498	C03793	HMDB0001325	440120					0.966156	0.95	0.98	1.35	1.3		0.0115	0.2395	0.5446	0.6244	0.9991	0.983	0.6834	0.9194	0.6497	0.7814	0.0524	0.4717	0.0812	0.7608		1.0696	0.9051	0.9297	0.8805	1.1979	1.2096	1.1863	1.0334		100	100	100	100	100	100
	119			hydroxy-N6,N6,N6-trimethyllysine*	LC/MS pos early	62959								0.882407	1.1	0.75	1.09	1.61		0.0246	0.2868	0.3815	0.568	0.0837	0.9683	0.5508	0.8989	0.0537	0.438	0.6689	0.7408	0.0091	0.6553		1.0868	0.8749	0.8336	0.9163	1.1708	1.34	1.0017	0.959		100	100	100	100	100	100
	121			5-hydroxylysine	LC/MS pos early	15685	C16741	HMDB0000450	3032849					1.08483	0.87	1.29	1.55	1.04		0.2481	0.5626	0.8731	0.7307	0.3644	0.9683	0.4735	0.8715	0.573	0.7539	0.1258	0.507	0.8645	0.9953		1.0515	0.9627	1.0291	0.8962	1.2295	1.0739	1.3851	1.1407		100	100	100	100	100	100
	122			5-(galactosylhydroxy)-lysine	LC/MS pos early	43582			66995551					0.835466	0.81	0.87	1.05	0.98		0.8368	0.8098	0.1575	0.4527	0.7713	0.9752	0.2515	0.7888	0.3929	0.7023	0.7097	0.7483	0.9546	1		1.1098	1.0139	1.1227	0.9051	1.0231	1.0969	0.9493	0.9272		100	100	100	100	100	100
	123			fructosyllysine	LC/MS pos early	46227		HMDB0034879	9839580					1.28744	1.18	1.38	1.38	1.18		0.1512	0.4842	0.1293	0.4239	0.9374	0.978	0.2804	0.7934	0.2757	0.6561	0.3044	0.6091	0.3063	0.8407		0.9703	0.9701	0.8898	1.0504	1.2495	1.0509	1.4481	1.2492		100	100	100	100	100	100
	125			2-aminoadipate	LC/MS polar	6146	C00956	HMDB0000510	92136					1.12842	1.02	1.23	1.25	1.03		0.2097	0.5248	0.2188	0.4808	0.6038	0.9683	0.6274	0.9145	0.1917	0.6003	0.1856	0.5485	0.6154	0.955		0.9212	0.916	0.9072	0.9249	1.0446	0.9351	1.1541	1.0395		100	100	100	100	100	100
	129			glutarylcarnitine (C5-DC)	LC/MS pos early	44664		HMDB0013130	71317118					1.37735	1.04	1.81	1.32	0.76		0.6837	0.7684	0.1297	0.4239	0.157	0.9683	0.9436	0.9453	0.0313	0.3911	0.4417	0.649	0.2211	0.7933		0.8634	1.0018	0.9798	1.0238	1.0508	0.747	1.3546	1.1892		100	100	100	100	100	100
	133			pipecolate	LC/MS pos early	1444		HMDB0000070						1.32636	1.15	1.56	1.06	0.78		0.9851	0.8362	0.1868	0.4609	0.8271	0.9752	0.4543	0.8701	0.2479	0.6472	0.8588	0.7881	0.8933	1		1.1478	1.3861	1.2914	1.4807	1.2841	1.0041	1.5642	1.5224		93	93	88	100	100	100
	135			6-oxopiperidine-2-carboxylate	LC/MS neg	43231		HMDB0061705	3014237					1.26827	1.02	1.6	1.18	0.75		0.798	0.8012	0.4768	0.6063	0.3954	0.9683	0.9249	0.9453	0.2444	0.6472	0.6539	0.7405	0.4582	0.8977		0.832	0.9588	0.9502	0.9674	0.9283	0.7137	1.143	1.0552		86	86	88	83	86	83
	139			N,N-dimethyl-5-aminovalerate	LC/MS pos early	62819								0.808825	0.79	0.84	0.69	0.65		0.9083	0.8282	0.5829	0.6346	0.9639	0.978	0.7349	0.9224	0.6555	0.7831	0.9042	0.7962	0.9626	1		1.1581	1.2561	1.4054	1.1067	0.8387	0.9108	0.7666	0.9367		71	64	63	67	76	83
	140			N,N,N-trimethyl-5-aminovalerate	LC/MS pos early	57687			14274897					1.26167	0.95	1.74	1.17	0.64		0.5689	0.743	0.18	0.4558	0.4955	0.9683	0.6504	0.9164	0.1322	0.5602	0.9325	0.8031	0.4024	0.878		0.9145	1.0908	1.1164	1.0652	0.9775	0.7126	1.2423	1.1538		100	100	100	100	100	100
	141			N-acetyl-2-aminoadipate	LC/MS polar	63920	C12986		443992					1.25035	1.27	1.23	0.97	1		0.9082	0.8282	0.1427	0.4346	0.7744	0.9752	0.2381	0.7881	0.3692	0.6963	0.7632	0.7662	0.9084	1		0.7058	0.8005	0.7046	0.8964	0.7877	0.707	0.8685	0.8825		50	57	38	83	76	67
	142		Phenylalanine Metabolism	phenylalanine	LC/MS pos early	64	C00079	HMDB0000159	6140					1.03397	1.03	1.04	1.02	1.01		0.7654	0.791	0.4898	0.6105	0.964	0.978	0.6642	0.9186	0.5806	0.7552	0.7966	0.779	0.865	0.9953		1.0037	1.0134	0.9986	1.0282	1.0281	1.0088	1.0473	1.0378		100	100	100	100	100	100
	144			N-acetylphenylalanine	LC/MS neg	33950	C03519	HMDB0000512	74839					1.26364	1.44	1.14	1.15	1.45		0.0491	0.3303	0.0536	0.3202	0.3657	0.9683	0.0588	0.6604	0.4204	0.7092	0.4033	0.6317	0.0555	0.7604		0.9001	0.8971	0.7362	1.0579	1.1404	1.064	1.2169	1.1374		100	100	100	100	100	100
	155			phenylpyruvate	LC/MS polar	566	C00166	HMDB0000205	997					0.778813	0.73	0.81	1.52	1.37		0.0558	0.333	0.1963	0.4699	0.8703	0.9757	0.4439	0.8659	0.2739	0.6561	0.1815	0.5485	0.1589	0.7608		0.9978	0.7293	0.8413	0.6173	1.0457	1.1543	0.937	0.7771		93	93	88	100	90	100
	156			phenyllactate (PLA)	LC/MS neg	22130	C05607	HMDB0000779 HMDB0000563	3848					0.99287	1.14	0.91	1.41	1.77		0.0182	0.2868	0.7067	0.6815	0.9674	0.978	0.7795	0.9328	0.8012	0.8296	0.0754	0.478	0.099	0.7608		1.1921	0.9205	0.8594	0.9815	1.4552	1.5247	1.3856	1.1836		100	100	100	100	100	100
	160			phenylacetate	LC/MS neg	57745	C07086	HMDB0000209	999					0.910517	0.74	1.09	1.43	0.97		0.8726	0.8233	0.5521	0.6267	0.2761	0.9683	0.2602	0.7909	0.706	0.795	0.348	0.6302	0.5299	0.921		1.0393	0.9174	1.0555	0.7792	1.0682	1.023	1.1134	0.9463		86	86	100	67	67	67
	161			2-hydroxyphenylacetate	LC/MS neg	1432	C05852	HMDB0000669	11970					1.15578	1.28	1.06	1.04	1.26		0.3466	0.6462	0.2155	0.4796	0.4133	0.9683	0.1701	0.7773	0.7463	0.8096	0.925	0.8031	0.2403	0.8153		0.9045	0.9145	0.802	1.0269	1.0354	1.007	1.0638	1.0454		57	71	50	100	76	67
	167		Tyrosine Metabolism	tyrosine	LC/MS pos early	1299	C00082	HMDB0000158	6057					1.04342	1.14	0.96	0.98	1.17		0.4111	0.6679	0.5884	0.637	0.2384	0.9683	0.2496	0.7881	0.6266	0.768	0.7839	0.7729	0.1819	0.7608		1.0341	1.0232	0.9552	1.0912	1.09	1.1131	1.0669	1.079		100	100	100	100	100	100
	168			N-acetyltyrosine	LC/MS neg	32390		HMDB0000866	68310					1.29488	1.49	1.13	0.92	1.2		0.6934	0.772	0.0465	0.3105	0.2727	0.9683	0.0403	0.6452	0.4783	0.7273	0.5936	0.7181	0.3174	0.8429		0.86	0.9708	0.7803	1.1612	1.0029	0.9398	1.0661	1.1136		100	100	100	100	100	100
	185			4-hydroxyphenylacetoylcarnitine	LC/MS pos early	52932								0.597717	0.57	0.62	1.42	1.32		0.1269	0.4469	0.1879	0.4618	0.5438	0.9683	0.6266	0.9145	0.1516	0.5888	0.4792	0.6665	0.1532	0.7608		1.2352	0.8376	1.0647	0.6105	1.1359	1.4056	0.8661	0.7383		64	57	50	67	81	83
	186			3-(4-hydroxyphenyl)lactate	LC/MS neg	32197	C03672	HMDB0000755	9378					1.33086	1.21	1.43	1.38	1.17		0.1385	0.4696	0.0745	0.3522	0.5841	0.9683	0.3925	0.8592	0.0817	0.4858	0.13	0.507	0.5212	0.917		0.9167	0.9343	0.8449	1.0238	1.2023	0.9885	1.4161	1.22		100	100	100	100	100	100
	195			phenol sulfate	LC/MS neg	32553	C02180	HMDB0060015	74426					0.938444	0.77	1.13	1.26	0.86		0.4202	0.6746	0.8612	0.7256	0.5727	0.9683	0.7934	0.9331	0.5797	0.7552	0.3063	0.6091	0.8695	0.9953		1.2249	1.165	1.3142	1.0157	1.2094	1.1355	1.2833	1.1495		100	100	100	100	100	100
	196			phenol glucuronide	LC/MS neg	52747		HMDB0060014	87235					0.609655	0.34	1.57	1.33	0.28		0.9444	0.8342	0.8912	0.7359	0.5115	0.9683	0.7265	0.9215	0.5518	0.7437	0.6591	0.7405	0.6257	0.955		1.2284	1.2782	1.9131	0.6434	0.6992	0.5438	0.8545	0.7489		43	36	25	50	62	67
	206			vanillactate	LC/MS neg	54910		HMDB0000913	160637					1.03092	1.11	0.96	0.92	1.06		0.8948	0.8263	0.8939	0.736	0.5738	0.9683	0.6406	0.9154	0.7469	0.8096	0.7463	0.7607	0.6411	0.955		1.0608	1.083	1.0278	1.1382	1.0715	1.0938	1.0491	1.0936		100	100	100	100	100	100
	207			vanillylmandelate (VMA)	LC/MS neg	1567	C05584	HMDB0000291	1245					0.735603	0.94	0.6	0.94	1.48		0.1014	0.4043	0.0222	0.2484	0.1398	0.9683	0.5541	0.9028	0.0061	0.2599	0.8978	0.7951	0.0395	0.7064		1.3336	1.0435	1.0759	1.0111	1.2712	1.5914	0.951	0.981		100	100	100	100	100	100
	209			3-methoxytyrosine	LC/MS pos early	12017		HMDB0001434	9307					0.941925	1.14	0.78	0.8	1.17		0.7042	0.776	0.3195	0.5331	0.0136	0.8182	0.2903	0.7952	0.0106	0.2728	0.0317	0.4109	0.1443	0.7608		1.2019	1.1825	1.1076	1.2574	1.1515	1.2963	1.0067	1.1321		100	100	100	100	100	100
	211			3-methoxytyramine sulfate	LC/MS neg	44618			54133459					0.991503	1.05	0.92	0.77	0.88		0.3849	0.6614	0.5399	0.6238	0.9167	0.978	0.63	0.9145	0.7023	0.7923	0.5649	0.7009	0.5129	0.9142		1.0004	1.094	1.0668	1.1213	0.8983	0.934	0.8626	0.9919		86	79	100	50	62	67
	225			5-hydroxymethyl-2-furoic acid	LC/MS polar	42040	C20448	HMDB0002432	80642					1.66837	1.72	1.61	0.78	0.83		0.5996	0.743	0.1278	0.4239	0.8303	0.9752	0.2413	0.7881	0.3197	0.6801	0.5796	0.7126	0.8344	0.9953		0.5102	0.7575	0.5571	0.9579	0.6039	0.4632	0.7445	0.8512		21	29	13	50	38	33
	229			dopamine 3-O-sulfate	LC/MS neg	48407	C13690	HMDB0006275	122136					1.92245	2.21	1.52	0.48	0.7		0.3638	0.6551	0.1949	0.4697	0.4682	0.9683	0.177	0.7795	0.661	0.7834	0.2235	0.5742	0.9008	1		1.3088	2.467	1.5392	3.3949	1.3579	1.0784	1.6374	2.5161		100	100	100	100	100	100
	230			p-cresol glucuronide*	LC/MS neg	48841		HMDB0011686	154035					1.17479	1.24	1.1	0.81	0.91		0.7382	0.7811	0.7616	0.6959	0.6226	0.9683	0.8988	0.9404	0.5513	0.7437	0.9053	0.7962	0.5797	0.9369		1.2867	1.5094	1.3457	1.6732	1.2888	1.2277	1.3499	1.5116		100	93	100	83	100	100
	231			tyramine O-sulfate	LC/MS neg	48408		HMDB0006409	153005					0.84833	0.87	0.84	1.86	1.94		0.1051	0.4075	0.75	0.6953	0.7708	0.9752	0.9853	0.9453	0.6476	0.7814	0.3102	0.6121	0.1975	0.7702		0.9013	0.5742	0.6131	0.5353	1.0916	1.1894	0.9938	0.7646		64	57	50	67	67	83
	232			N-formylphenylalanine	LC/MS neg	48433		HMDB0240317	7064571;759256					1.23362	1.19	1.28	0.9	0.84		0.3629	0.6551	0.3598	0.5615	0.7316	0.9752	0.6982	0.9195	0.3461	0.6963	0.668	0.7408	0.401	0.878		1.056	1.2574	1.1466	1.3682	1.1013	0.9654	1.2371	1.3027		100	100	100	100	100	100
	233			vanillic alcohol sulfate	LC/MS neg	48733		HMDB0041788						5.80894	9.82	2.49	0.31	1.21		0.5804	0.743	0.2449	0.4943	0.5663	0.9683	0.2454	0.7881	0.6529	0.7814	0.3998	0.6317	0.9888	1		2.2244	10.8907	2.0124	19.7691	4.2551	2.4364	6.0738	12.9214		71	64	63	67	86	83
	242			catechol glucuronide	LC/MS neg	53243		HMDB0240490	75124209					2.64082	4.98	1.21	0.4	1.64		0.8534	0.8138	0.063	0.3368	0.0739	0.9683	0.0165	0.6452	0.9531	0.8516	0.1369	0.5076	0.2731	0.8294		0.6565	1.4895	0.4979	2.4811	0.9007	0.815	0.9863	1.7337		36	29	13	50	57	67
	250			thyroxine	LC/MS neg	2761	C01829	HMDB0000248	5819					0.929903	1.04	0.83	0.9	1.12		0.9265	0.8311	0.5668	0.6291	0.1407	0.9683	0.536	0.8958	0.127	0.5537	0.2954	0.6091	0.2899	0.8358		1.0514	1.011	0.9907	1.0312	1.0181	1.112	0.9242	0.9777		100	100	100	100	100	100
	259		Tryptophan Metabolism	tryptophan	LC/MS pos early	54	C00078	HMDB0000929	6305					1.01404	1	1.02	1.16	1.14		0.0424	0.3234	0.809	0.7053	0.9955	0.9823	0.8741	0.9376	0.8528	0.8387	0.1215	0.507	0.1667	0.7608		0.983	0.9211	0.9198	0.9223	1.0587	1.0461	1.0714	0.9968		100	100	100	100	100	100
	260			N-acetyltryptophan	LC/MS neg	33959	C03137	HMDB0013713	439917;700653					1.31603	1.36	1.29	1.38	1.46		0.0057	0.1975	0.071	0.3496	0.7187	0.9742	0.1442	0.7398	0.2673	0.6561	0.0598	0.4717	0.0327	0.7032		0.8436	0.8105	0.6867	0.9344	1.1432	1.0004	1.2861	1.1102		100	100	100	100	100	100
	266			C-glycosyltryptophan	LC/MS neg	48782		HMDB0240296	10981970					0.918142	0.91	0.92	0.95	0.94		0.418	0.6736	0.1784	0.4558	0.9929	0.9809	0.3658	0.846	0.3066	0.6745	0.5383	0.6854	0.5899	0.9426		1.0677	1.0528	1.1006	1.0049	0.9952	1.0348	0.9556	0.9803		100	100	100	100	100	100
	268			oxindolylalanine	LC/MS pos early	64568			20977764					1.25972	1.24	1.28	0.93	0.9		0.521	0.722	0.1126	0.4088	0.9857	0.9807	0.287	0.7937	0.2249	0.6313	0.6393	0.7324	0.6576	0.9598		0.983	1.1573	1.0328	1.2818	1.064	0.9332	1.1947	1.2383		100	100	100	100	100	100
	269			tryptophan betaine	LC/MS pos early	37097	C09213	HMDB0061115	442106					1.79321	1.69	1.9	1.06	0.94		0.9752	0.8346	0.6575	0.6683	0.7153	0.974	0.5882	0.9132	0.9528	0.8516	0.8023	0.7794	0.7905	0.9875		1.8347	2.5407	1.8902	3.1911	2.584	1.7791	3.3889	3.29		100	100	100	100	100	100
	272			kynurenine	LC/MS pos early	15140	C00328	HMDB0000684	161166					1.16157	0.95	1.41	1.28	0.87		0.6037	0.7432	0.0998	0.3861	0.0457	0.9456	0.7976	0.9331	0.008	0.2703	0.0597	0.4717	0.3041	0.8407		0.9018	0.942	0.967	0.917	1.0073	0.8367	1.1779	1.0475		100	100	100	100	100	100
	275			N-acetylkynurenine (2)	LC/MS neg	48757		HMDB0240342	73817779					1.52764	1.28	1.68	2.15	1.64		0.0096	0.2337	0.3447	0.5514	0.8065	0.9752	0.6361	0.9145	0.3725	0.6972	0.0312	0.4109	0.1016	0.7608		0.6457	0.5585	0.4899	0.6272	1.0735	0.8015	1.3455	0.9864		57	36	25	50	90	100
	277			kynurenate	LC/MS neg	1417	C01717	HMDB0000715	3845					1.07822	0.95	1.19	1.33	1.06		0.0773	0.362	0.695	0.6781	0.281	0.9683	0.6413	0.9154	0.2715	0.6561	0.0359	0.4189	0.6277	0.955		0.9486	0.8996	0.9205	0.8787	1.0718	0.9768	1.1669	1.0228		100	100	100	100	100	100
	279			N-formylanthranilic acid	LC/MS neg	43549	C05653	HMDB0004089	101399					1.09545	1.15	1.04	1.05	1.16		0.2497	0.5636	0.482	0.6083	0.6924	0.9717	0.4617	0.8715	0.8163	0.8306	0.5659	0.7015	0.2997	0.8401		0.8811	0.8803	0.8174	0.9433	0.966	0.9449	0.9871	0.9652		93	86	88	83	100	100
	280			anthranilate	LC/MS pos early	4970	C00108	HMDB0001123	227					1.03634	1.03	1.04	0.82	0.82		0.1866	0.51	0.8309	0.7113	0.7029	0.9717	0.6899	0.9195	0.8996	0.8465	0.4744	0.6622	0.2532	0.8236		1.0263	1.1475	1.1291	1.1659	0.9424	0.9234	0.9614	1.0636		100	100	100	100	100	100
	283			xanthurenate	LC/MS neg	15679	C02470	HMDB0000881	5699					1.16639	0.99	1.38	1.19	0.85		0.9462	0.8342	0.3614	0.5615	0.311	0.9683	0.9451	0.9453	0.1524	0.5888	0.4761	0.6631	0.467	0.8977		0.6743	0.7243	0.7291	0.7194	0.7365	0.6194	0.8535	0.7865		21	29	25	33	33	17
	284			8-methoxykynurenate	LC/MS neg	62955	C05830	HMDB0060426	76230					1.12758	1.43	0.96	1.25	1.86		0.1268	0.4469	0.4748	0.6063	0.6632	0.9683	0.4411	0.8659	0.8329	0.8351	0.4036	0.6317	0.1876	0.7665		0.6874	0.5848	0.4815	0.6882	0.8776	0.8933	0.862	0.7751		43	43	38	50	67	50
	287			picolinate	LC/MS pos early	1512	C10164	HMDB0002243	1018					0.968453	1.07	0.89	0.99	1.19		0.5846	0.743	0.9488	0.7446	0.3155	0.9683	0.5263	0.891	0.422	0.7092	0.7281	0.7545	0.2996	0.8401		1.2204	1.1491	1.1129	1.1853	1.2533	1.328	1.1785	1.1819		93	93	88	100	100	100
	292			serotonin	LC/MS pos early	2342	C00780	HMDB0000259	5202					0.861802	1.5	0.55	0.75	2.06		0.8387	0.8098	0.8632	0.7256	0.2813	0.9683	0.4007	0.8592	0.4941	0.7286	0.3365	0.6229	0.5543	0.9292		2.0268	1.66	1.3257	1.9942	2.1135	2.7278	1.4991	1.7467		100	100	100	100	95	100
	303			indolelactate	LC/MS neg	18349	C02043	HMDB0000671	92904					1.2654	1	1.48	1.82	1.22		0.0008	0.09	0.1023	0.3911	0.111	0.9683	0.9772	0.9453	0.0182	0.3221	0.0003	0.0685	0.1735	0.7608		0.8832	0.7943	0.7951	0.7935	1.2065	0.9713	1.4416	1.1176		100	93	100	83	100	100
	304			indoleacetate	LC/MS neg	27513	C00954	HMDB0000197	802					1.39397	1.49	1.31	1.02	1.16		0.4862	0.713	0.1133	0.4088	0.851	0.9757	0.2315	0.7859	0.2883	0.6592	0.7017	0.7461	0.553	0.9292		0.9153	1.0555	0.8468	1.2641	1.1358	0.9839	1.2877	1.2759		100	93	100	83	100	100
	310			indolepropionate	LC/MS neg	32405		HMDB0002302	3744					1.22734	0.9	1.89	1.02	0.49		0.4902	0.7154	0.216	0.4796	0.5253	0.9683	0.68	0.9186	0.163	0.5888	0.9668	0.811	0.3754	0.8711		1.0016	1.2811	1.3466	1.2156	0.9498	0.6566	1.243	1.2293		93	93	100	83	90	83
	312			indoleacetylglutamine	LC/MS neg	42087		HMDB0013240	25200879					1.11795	0.91	1.29	1.68	1.19		0.4679	0.6986	0.4909	0.6105	0.8654	0.9757	0.7264	0.9215	0.5198	0.7385	0.502	0.6731	0.7078	0.9773		1.1039	0.9648	1.0087	0.9209	1.3732	1.1991	1.5473	1.2341		57	64	50	83	81	67
	322			indolebutyrate	LC/MS neg	34402	C11284	HMDB0002096	8617					1.20439	1.41	1.04	0.93	1.25		0.5743	0.743	0.3687	0.5615	0.2625	0.9683	0.1782	0.7795	0.8648	0.8434	0.6701	0.7408	0.2604	0.8277		0.774	0.8283	0.6881	0.9685	0.8779	0.8599	0.8959	0.9322		57	50	38	67	67	83
	324			indoleacetoylcarnitine*	LC/MS pos early	62279								0.958022	1.22	0.82	1.32	1.95		0.1025	0.4043	0.7828	0.6984	0.302	0.9683	0.3799	0.8577	0.567	0.7508	0.6385	0.7324	0.0765	0.7604		0.9505	0.7152	0.6437	0.7866	1.146	1.2573	1.0346	0.9106		79	79	63	100	95	100
	325			5-hydroxyindole sulfate	LC/MS neg	52914								1.29139	1.33	1.26	1.15	1.22		0.3	0.6119	0.2502	0.4978	0.8502	0.9757	0.3679	0.846	0.4673	0.7202	0.5219	0.6821	0.4102	0.878		0.7629	0.8024	0.6886	0.9163	0.9457	0.8373	1.0541	0.9852		57	50	50	50	76	67
	327			3-indoxyl sulfate	LC/MS neg	27672		HMDB0000682	10258					1.21446	1.05	1.36	1.48	1.15		0.0918	0.3878	0.9796	0.7485	0.2106	0.9683	0.4072	0.8592	0.3356	0.6951	0.0307	0.4109	0.7588	0.9875		0.9475	0.9065	0.8834	0.9295	1.1917	1.0115	1.3719	1.1507		100	100	100	100	100	100
	332			6-bromotryptophan	LC/MS neg	62503			9856996					0.970618	0.96	0.98	0.9	0.88		0.6727	0.7668	0.9292	0.7446	0.8635	0.9757	0.8612	0.9338	0.9502	0.8516	0.6559	0.7405	0.8663	0.9953		1.0789	1.1232	1.1464	1.1001	1.0029	1.0115	0.9943	1.0472		100	100	100	100	100	100
	337		Leucine, Isoleucine and Valine Metabolism	leucine	LC/MS pos early	60	C00123	HMDB0000687	6106					1.15952	1.07	1.26	1.13	0.96		0.6383	0.7553	0.0662	0.3429	0.3057	0.9683	0.5671	0.9083	0.0347	0.4091	0.2642	0.5953	0.7064	0.9767		0.8751	0.9243	0.8949	0.9537	0.9654	0.8553	1.0756	1.0147		100	100	100	100	100	100
	341			N-acetylleucine	LC/MS neg	1587	C02710	HMDB0011756	70912					1.28317	1.37	1.2	0.92	1.05		0.7916	0.799	0.0689	0.3448	0.9021	0.9776	0.1876	0.7828	0.1964	0.6016	0.9155	0.8011	0.7951	0.9875		0.826	0.954	0.8059	1.1021	0.932	0.8461	1.0178	1.0599		100	100	100	100	100	100
	348			4-methyl-2-oxopentanoate	LC/MS neg	22116	C00233	HMDB0000695	70					1.0802	1.02	1.13	1.37	1.23		0.0445	0.3275	0.558	0.6291	0.6219	0.9683	0.95	0.9453	0.4197	0.7092	0.061	0.4717	0.2925	0.8358		0.9763	0.8843	0.8772	0.8915	1.1466	1.0755	1.2176	1.0546		100	100	100	100	100	100
	352			alpha-hydroxyisocaproate	LC/MS neg	22132	C03264	HMDB0000665 HMDB0000624 HMDB00746	92779;83697;439960					0.892847	0.94	0.86	1.33	1.44		0.1363	0.4656	0.7545	0.6953	0.7547	0.9752	0.9998	0.9453	0.6395	0.7785	0.3695	0.6317	0.2252	0.7933		1.0275	0.8146	0.842	0.7873	1.1302	1.2131	1.0474	0.9174		93	93	88	100	90	100
	353			2-ketocaprylate	LC/MS neg	63120		HMDB0013211	67600					1.82647	1.78	1.88	0.82	0.78		0.2425	0.5594	0.0015	0.1476	0.8731	0.9757	0.0333	0.6452	0.0103	0.2728	0.4454	0.6493	0.3712	0.8656		0.8275	1.2954	0.9304	1.6603	1.0436	0.7246	1.3626	1.5114		93	93	88	100	100	100
	356			isovalerate (i5:0)	LC/MS neg	44656	C08262	HMDB0000718	10430					0.873181	0.94	0.8	0.87	1.03		0.5174	0.722	0.3742	0.5644	0.631	0.9683	0.7818	0.9328	0.3064	0.6745	0.3992	0.6317	0.9101	1		1.1473	1.1012	1.1331	1.0693	1.0479	1.1615	0.9344	1.0018		100	100	100	100	100	100
	358			isovalerylglycine	LC/MS neg	35107		HMDB00678	546304					1.59168	1.47	1.73	1.04	0.88		0.958	0.8346	0.0388	0.2939	0.2723	0.9683	0.4905	0.8715	0.0198	0.3322	0.3867	0.6317	0.4805	0.8977		0.7384	0.9684	0.7839	1.153	0.9453	0.693	1.1976	1.1753		86	86	100	67	86	67
	359			isovalerylcarnitine (C5)	LC/MS pos early	34407	C20826	HMDB0000688	169235					1.1305	1.03	1.23	1.27	1.06		0.1802	0.5026	0.9143	0.7421	0.4491	0.9683	0.6619	0.9186	0.5165	0.7385	0.119	0.507	0.6879	0.9698		0.9326	0.9156	0.9042	0.9271	1.0712	0.9609	1.1816	1.0543		100	100	100	100	100	100
	368			beta-hydroxyisovalerate	LC/MS neg	12129		HMDB0000754	69362					1.62464	2.17	1.21	0.72	1.3		0.4547	0.6951	0.1327	0.4251	0.3463	0.9683	0.1035	0.7173	0.6623	0.7834	0.8822	0.7933	0.2592	0.8277		0.8605	1.1867	0.7498	1.6236	1.0719	0.9713	1.1725	1.398		100	100	100	100	100	100
	369			beta-hydroxyisovaleroylcarnitine	LC/MS pos early	35433								1.2411	1.32	1.19	1.3	1.44		0.0177	0.2868	0.3619	0.5615	0.9554	0.978	0.5642	0.9082	0.467	0.7202	0.0639	0.4717	0.1105	0.7608		0.9635	0.9158	0.7898	1.0419	1.2435	1.1372	1.3498	1.1958		100	100	100	100	100	100
	372			3-methylglutaconate	LC/MS polar	57747		HMDB0000522	1551553					1.15722	0.95	1.39	1.32	0.9		0.5899	0.743	0.4413	0.5945	0.3645	0.9683	0.9255	0.9453	0.2117	0.6159	0.2803	0.6091	0.8027	0.9922		0.9477	0.9712	0.9968	0.9456	1.0732	0.8986	1.2478	1.0967		93	93	88	100	95	100
	380			3-methylglutarylcarnitine (2)	LC/MS pos early	46548		HMDB0000552	128145					0.871205	0.68	1.19	1.01	0.58		0.4278	0.6809	0.6027	0.6448	0.5523	0.9683	0.4554	0.8701	0.9555	0.8516	0.8802	0.7933	0.3534	0.8621		1.403	1.4928	1.7721	1.2135	1.1324	1.0338	1.231	1.2223		100	100	100	100	100	100
	390			isoleucine	LC/MS pos early	1125	C16424 C00407 C06418	HMDB0000172	6306					1.06731	1.02	1.11	1.07	0.98		0.7988	0.8012	0.2932	0.5171	0.4374	0.9683	0.8509	0.9333	0.1738	0.5888	0.4397	0.649	0.7247	0.9852		0.9478	0.9692	0.9591	0.9793	0.9902	0.9365	1.0439	1.0116		100	100	100	100	100	100
	392			N-acetylisoleucine	LC/MS neg	33967		HMDB0061684	306109					1.40801	1.46	1.36	0.89	0.96		0.7535	0.7847	0.0611	0.335	0.8329	0.9752	0.1581	0.754	0.2039	0.6094	0.6939	0.7445	0.9448	1		0.7919	0.9938	0.8094	1.1782	0.9131	0.7743	1.0519	1.115		93	86	88	83	95	100
	399			3-methyl-2-oxovalerate	LC/MS neg	15676	C00671 C06008 C03465	HMDB0000491	440877;439286					1.07358	1.01	1.13	1.27	1.13		0.1875	0.51	0.5456	0.6244	0.5303	0.9683	0.9875	0.9453	0.3574	0.6963	0.1471	0.523	0.6357	0.955		0.9826	0.9247	0.9217	0.9277	1.1128	1.0435	1.1821	1.0549		100	100	100	100	100	100
	400			2-hydroxy-3-methylvalerate	LC/MS neg	36746		HMDB0000317	164623					1.54119	0.72	2.25	3.58	1.16		0.0483	0.3303	0.8826	0.7321	0.0981	0.9683	0.3044	0.8104	0.1742	0.5888	0.0083	0.268	0.8157	0.9933		0.9006	0.7206	0.8358	0.6055	1.5681	0.9655	2.1706	1.388		93	93	88	100	95	100
	402			2-methylbutyrylcarnitine (C5)	LC/MS pos early	45095		HMDB0000378	6426901					1.14499	0.98	1.34	1.18	0.86		0.9138	0.8282	0.1956	0.4697	0.1665	0.9683	0.9501	0.9453	0.0484	0.4259	0.2612	0.5953	0.3871	0.878		0.9049	0.9612	0.9713	0.951	0.9798	0.8385	1.1212	1.0361		100	100	100	100	100	100
	404			2-methylbutyrylglycine	LC/MS pos early	31928		HMDB0000339	193872					0.969642	0.88	1.05	1.38	1.15		0.144	0.4728	0.6996	0.6798	0.7084	0.9717	0.6106	0.9145	0.9929	0.8588	0.1693	0.5413	0.4576	0.8977		1.0442	0.9111	0.9716	0.8506	1.1456	1.1168	1.1744	1.0125		100	100	100	100	100	100
	405			tiglylcarnitine (C5:1-DC)	LC/MS pos early	35428		HMDB0002366	22833596					1.18647	0.85	1.58	1.59	0.85		0.3242	0.6299	0.2991	0.5234	0.0263	0.8525	0.3979	0.8592	0.0162	0.3202	0.0179	0.3585	0.3785	0.8733		0.9079	0.9047	0.979	0.8303	1.0804	0.8368	1.324	1.0772		100	93	100	83	100	100
	410			3-hydroxy-2-ethylpropionate	LC/MS neg	32397		HMDB0000396	188979					1.01495	0.79	1.26	1.51	0.94		0.2384	0.5569	0.6794	0.6706	0.1181	0.9683	0.1842	0.7815	0.3789	0.6972	0.0433	0.4336	0.7876	0.9875		0.9899	0.9109	1.0204	0.8015	1.0837	0.9594	1.2079	1.0047		100	100	100	100	100	100
	412			ethylmalonate	LC/MS polar	15765		HMDB0000622	11756					0.930595	0.93	0.93	1.17	1.18		0.4621	0.697	0.4959	0.6111	0.8193	0.9752	0.7604	0.9257	0.4956	0.7286	0.7024	0.7461	0.5179	0.917		1.1152	0.9886	1.0226	0.9547	1.1643	1.2078	1.1209	1.0378		100	100	100	100	100	100
	415			methylsuccinate	LC/MS polar	15745		HMDB0001844	10349					0.927647	1.06	0.83	1.06	1.36		0.0789	0.366	0.3848	0.5706	0.3464	0.9683	0.9604	0.9453	0.178	0.589	0.5232	0.6824	0.0723	0.7604		1.1361	0.9922	0.9628	1.0215	1.1978	1.3093	1.0863	1.0539		100	100	100	100	100	100
	421			valine	LC/MS pos early	1649	C00183	HMDB0000883	6287					1.0731	0.91	1.27	1.15	0.83		0.7747	0.7923	0.3712	0.5624	0.0545	0.9683	0.4698	0.8715	0.037	0.4172	0.2093	0.559	0.1351	0.7608		0.8974	0.9388	0.9811	0.8966	0.9216	0.8136	1.0295	0.963		100	100	100	100	100	100
	422			N-acetylvaline	LC/MS neg	1591		HMDB0011757	66789					1.07897	0.98	1.19	1.13	0.93		0.5983	0.743	0.6047	0.6448	0.2223	0.9683	0.6314	0.9145	0.1944	0.6009	0.1922	0.5486	0.6358	0.955		0.932	0.9548	0.9658	0.9437	0.9828	0.8981	1.0674	1.0056		100	100	100	100	100	100
	428			3-methyl-2-oxobutyrate	LC/MS neg	44526	C00141	HMDB0000019	49					0.98849	0.83	1.14	1.38	1		0.1522	0.4842	0.771	0.6979	0.1294	0.9683	0.2236	0.785	0.3504	0.6963	0.0304	0.4109	0.9522	1		1.0252	0.9389	1.0249	0.8529	1.0997	1.0255	1.1739	1.0134		100	100	100	100	100	100
	429			alpha-hydroxyisovalerate	LC/MS polar	46537		HMDB0000407	99823					1.66925	0.81	2.6	2.96	0.92		0.1758	0.4958	0.4181	0.5887	0.1012	0.9683	0.5643	0.9082	0.0692	0.4655	0.028	0.4109	0.8398	0.9953		0.9279	0.8741	0.9655	0.7827	1.6026	0.8903	2.315	1.5489		100	100	100	100	100	100
	431			isobutyrylcarnitine (C4)	LC/MS pos early	33441		HMDB0000736	168379					1.07869	0.86	1.46	0.97	0.57		0.2976	0.6119	0.4703	0.6058	0.3358	0.9683	0.8696	0.9357	0.2095	0.6149	0.9516	0.8091	0.1816	0.7608		0.9645	1.1395	1.2247	1.0543	0.8653	0.7042	1.0264	1.0404		100	100	100	100	100	100
	432			isobutyrylglycine	LC/MS neg	35437		HMDB0000730	10855600					1.29185	1.16	1.46	1.01	0.8		0.9053	0.8282	0.6439	0.6647	0.2858	0.9683	0.6807	0.9186	0.2531	0.6505	0.3727	0.6317	0.5217	0.917		0.8679	1.0403	0.9652	1.1154	0.9487	0.7705	1.127	1.1212		93	86	88	83	100	100
	433			3-hydroxyisobutyrate	LC/MS polar	1549	C01188 C06001	HMDB0000023 HMDB0000336	11966314					1.0077	1.29	0.81	0.89	1.42		0.257	0.5716	0.7616	0.6959	0.3734	0.9683	0.4235	0.8603	0.6574	0.7833	0.8516	0.7865	0.1773	0.7608		1.0255	0.969	0.8459	1.0921	1.0898	1.205	0.9746	1.0334		86	86	75	100	100	100
	440		Methionine, Cysteine, SAM and Taurine Metabolism	methionine	LC/MS pos early	1302	C00073	HMDB0000696	6137					1.18534	1.13	1.24	1.15	1.04		0.4033	0.6658	0.0854	0.3728	0.7154	0.974	0.3518	0.841	0.1178	0.5301	0.3691	0.6317	0.7499	0.9875		0.9275	0.9657	0.9073	1.024	1.0613	0.9476	1.1749	1.0994		100	100	100	100	100	100
	441			N-acetylmethionine	LC/MS neg	1589	C02712	HMDB0011745	448580					0.971004	1.09	0.87	0.9	1.14		0.885	0.8253	0.5753	0.6316	0.1989	0.9683	0.6201	0.9145	0.1687	0.5888	0.3882	0.6317	0.3354	0.8563		1.0622	1.0393	0.9942	1.0845	1.0543	1.1302	0.9784	1.0314		100	100	100	100	100	100
	443			N-formylmethionine	LC/MS neg	2829	C03145	HMDB0001015	439750					0.994518	0.92	1.06	1.19	1.04		0.1224	0.4411	0.7041	0.6815	0.2925	0.9683	0.3369	0.8341	0.6097	0.7645	0.055	0.4717	0.7309	0.9875		1.0032	0.9469	0.9845	0.9092	1.0541	1.0219	1.0862	0.9977		100	93	100	83	100	100
	444			S-methylmethionine	LC/MS pos early	38127	C05319	HMDB0038670	458					2.6521	3.15	1.71	0.29	0.52		0.3589	0.6551	0.366	0.5615	0.8927	0.9772	0.6039	0.9145	0.4355	0.7101	0.5552	0.6942	0.4793	0.8977		0.6476	1.7611	0.8495	2.6727	0.604	0.4458	0.7623	1.7175		29	21	25	17	33	33
	445			methionine sulfone	LC/MS pos early	44878		HMDB0062174	69961					0.885444	0.69	1.19	1.14	0.66		0.3471	0.6462	0.3441	0.5512	0.1552	0.9683	0.115	0.7227	0.7123	0.7964	0.709	0.7483	0.1158	0.7608		1.058	1.075	1.2742	0.8757	0.9199	0.8418	0.998	0.9368		100	100	100	100	100	100
	446			methionine sulfoxide	LC/MS pos early	18374	C02989	HMDB0002005	158980					1.38567	1.54	1.23	0.82	1.03		0.5697	0.743	0.0269	0.2611	0.296	0.9683	0.0302	0.6452	0.3516	0.6963	0.2286	0.58	0.7454	0.9875		0.9083	1.1366	0.8935	1.3798	1.0303	0.9231	1.1375	1.2586		100	100	100	100	100	100
	452			S-adenosylhomocysteine (SAH)	LC/MS neg	42382	C00021	HMDB0000939	439155					0.952866	0.91	0.99	1.23	1.13		0.1303	0.4511	0.5134	0.6185	0.5988	0.9683	0.4297	0.8612	0.9232	0.8495	0.1279	0.507	0.4978	0.9029		1.0311	0.9241	0.9688	0.8794	1.0896	1.0934	1.0857	0.9825		100	100	100	100	95	100
	453			5-methylthioribose**	LC/MS pos early	62100		HMDB0001087	6419710					0.932246	0.96	0.91	1.11	1.17		0.4322	0.6863	0.6654	0.6683	0.8777	0.9757	0.8515	0.9333	0.6603	0.7834	0.6342	0.7324	0.5282	0.921		1.104	0.9961	1.0157	0.9765	1.1371	1.1924	1.0819	1.0292		100	100	100	100	100	100
	454			2,3-dihydroxy-5-methylthio-4-pentenoate (DMTPA)*	LC/MS neg	62805		HMDB0240388						1.11851	1.05	1.19	1.13	1		0.6494	0.7625	0.2375	0.4867	0.5145	0.9683	0.7171	0.9215	0.172	0.5888	0.4079	0.6317	0.8939	1		0.9442	0.9696	0.9453	0.9939	1.0307	0.943	1.1184	1.0561		100	100	100	100	100	100
	455			2-hydroxy-4-(methylthio)butanoic acid	LC/MS polar	63739		HMDB0037115	11427					1.12144	1.06	1.16	1.71	1.56		0.0365	0.3019	0.5471	0.6244	0.9834	0.9807	0.6756	0.9186	0.6624	0.7834	0.1146	0.507	0.1489	0.7608		1.0688	0.8597	0.8345	0.8849	1.4076	1.303	1.5123	1.1986		100	100	100	100	100	100
	460			alpha-ketobutyrate	LC/MS polar	4968	C00109	HMDB0000005	58					1.45745	0.87	2.09	2.22	0.93		0.1662	0.4944	0.5842	0.6348	0.2061	0.9683	0.6239	0.9145	0.1765	0.589	0.0508	0.4717	0.9329	1		0.7004	0.6806	0.7276	0.6336	1.0406	0.6732	1.4079	1.0208		71	57	63	50	90	83
	461			cysteine	LC/MS pos early	1868	C00097	HMDB0000574	5862					1.04471	0.99	1.09	1.37	1.24		0.0794	0.366	0.9476	0.7446	0.8606	0.9757	0.9412	0.9453	0.8563	0.8402	0.1455	0.523	0.2808	0.8294		0.9887	0.8788	0.8845	0.8731	1.1428	1.0928	1.1927	1.0329		100	100	100	100	100	100
	463			S-methylcysteine	LC/MS neg	39592		HMDB0002108	88180;7058174;24417					1.20397	1.09	1.36	0.97	0.78		0.7195	0.7761	0.1568	0.4527	0.966	0.978	0.3521	0.841	0.2711	0.6561	0.8122	0.7794	0.7875	0.9875		1.1296	1.3263	1.2718	1.3807	1.1633	0.9874	1.3392	1.36		100	100	100	100	100	100
	464			S-methylcysteine sulfoxide	LC/MS pos early	43378		HMDB0029432	82142					1.16228	1.08	1.29	0.76	0.64		0.2423	0.5594	0.3782	0.5653	0.7762	0.9752	0.4343	0.8649	0.652	0.7814	0.2759	0.6062	0.5481	0.9291		1.2417	1.5801	1.5167	1.6435	1.1048	0.9667	1.2429	1.4432		100	100	100	100	100	100
	466			S-carboxyethylcysteine	LC/MS pos early	64177								0.653279	1.03	0.47	0.98	2.13		0.1594	0.4918	0.3435	0.551	0.3508	0.9683	0.9922	0.9453	0.1622	0.5888	0.7132	0.75	0.1191	0.7608		1.5935	1.0353	1.018	1.0525	1.5992	2.169	1.0294	1.041		100	100	100	100	100	100
	467			cysteine s-sulfate	LC/MS pos early	22176	C05824	HMDB0000731	115015					0.873359	0.98	0.8	1.18	1.44		0.1591	0.4918	0.3047	0.5282	0.5834	0.9683	0.7449	0.9224	0.2398	0.6431	0.51	0.6752	0.1901	0.7682		1.1426	0.9259	0.937	0.9148	1.2147	1.3483	1.0811	0.9979		100	100	100	100	100	100
	468			cystine	LC/MS pos early	56	C00491	HMDB0000192	67678					0.80858	0.69	0.92	1.38	1.04		0.3616	0.6551	0.1694	0.455	0.6467	0.9683	0.2191	0.785	0.4842	0.7275	0.3057	0.6091	0.7581	0.9875		1.317	1.0924	1.2898	0.895	1.2895	1.3442	1.2348	1.0649		100	100	100	100	100	100
	474			cysteine sulfinic acid	LC/MS pos early	37443	C00606	HMDB0000996	109					0.780895	0.8	0.77	1.47	1.54		0.0002	0.0805	0.0132	0.237	0.8674	0.9757	0.1091	0.7227	0.0442	0.4259	0.0043	0.2313	0.0055	0.5766		1.162	0.8263	0.9165	0.7361	1.2432	1.4076	1.0788	0.9074		100	100	100	100	100	100
	476			hypotaurine	LC/MS pos early	590	C00519	HMDB0000965	107812					1.23562	1.46	1.07	1.01	1.38		0.3664	0.6553	0.6414	0.6641	0.5527	0.9683	0.478	0.8715	0.923	0.8495	0.814	0.7794	0.3168	0.8429		1.0678	1.1058	0.8973	1.3143	1.2814	1.2383	1.3245	1.3194		100	100	100	100	100	100
	477			taurine	LC/MS pos early	2125	C00245	HMDB0000251	1123					1.06061	1.12	0.99	0.78	0.89		0.1693	0.4944	0.9288	0.7446	0.6734	0.9695	0.7317	0.9224	0.803	0.8301	0.1791	0.5483	0.5151	0.9148		1.1153	1.2541	1.1808	1.3274	1.0441	1.0498	1.0384	1.1829		100	100	100	100	100	100
	478			N-methyltaurine	LC/MS polar	42989			7882					2.58544	3.07	1.84	0.39	0.65		0.2022	0.5235	0.0895	0.3753	0.7918	0.9752	0.1854	0.7815	0.2735	0.6561	0.2482	0.5865	0.492	0.9029		0.6578	1.625	0.7981	2.4518	0.7335	0.5174	0.9495	1.7007		21	36	38	33	33	0
	479			N-acetyltaurine	LC/MS neg	48187		HMDB0240253	159864					1.10467	1.15	1.06	0.8	0.86		0.3306	0.6307	0.6309	0.6604	0.7488	0.9752	0.5915	0.9132	0.9039	0.8477	0.3329	0.6222	0.6584	0.9601		0.792	0.9112	0.8494	0.9729	0.7557	0.7345	0.7769	0.8749		71	71	75	67	52	67
	482			succinoyltaurine	LC/MS polar	63678								0.674971	0.73	0.63	0.98	1.13		0.6519	0.7632	0.0202	0.24	0.4961	0.9683	0.247	0.7881	0.0252	0.3632	0.8623	0.7898	0.4485	0.8952		1.2042	0.9767	1.1321	0.8212	1.0403	1.2763	0.8043	0.8128		71	71	63	83	71	83
	487			3-sulfo-alanine	LC/MS polar	47089	C00506	HMDB0002757	72886					0.882769	0.99	0.79	0.91	1.13		0.8396	0.8098	0.3305	0.5409	0.3458	0.9683	0.9834	0.9453	0.1545	0.5888	0.3904	0.6317	0.6169	0.955		1.1311	1.0539	1.0597	1.0481	1.0757	1.2024	0.9489	0.9985		100	100	100	100	100	100
	490		Urea cycle; Arginine and Proline Metabolism	arginine	LC/MS pos early	1638	C00062	HMDB0000517	6322					1.04974	1.04	1.06	0.96	0.95		0.4858	0.713	0.4308	0.5916	0.8874	0.9758	0.6632	0.9186	0.4856	0.7284	0.6759	0.7431	0.5734	0.9351		0.9549	1.0018	0.98	1.0236	0.9555	0.9298	0.9812	1.0024		100	100	100	100	100	100
	492			urea	LC/MS pos early	1670	C00086	HMDB0000294	1176					0.949159	0.94	0.95	1.22	1.2		0.168	0.4944	0.6747	0.6697	0.878	0.9757	0.7006	0.9195	0.8415	0.8351	0.249	0.5865	0.4056	0.878		1.0759	0.9482	0.9765	0.9199	1.1489	1.1754	1.1224	1.0212		100	100	100	100	100	100
	494			ornithine	LC/MS pos early	1493	C00077	HMDB0000214	6262					1.03159	1.22	0.89	0.97	1.34		0.3745	0.6567	0.5344	0.6232	0.2365	0.9683	0.2275	0.785	0.6672	0.7834	0.8199	0.7817	0.1673	0.7608		1.0668	1.0135	0.9112	1.1158	1.1539	1.2224	1.0853	1.1005		100	100	100	100	100	100
	496			3-amino-2-piperidone	LC/MS pos early	62853		HMDB0000323	5200225					1.11128	1.11	1.11	1.15	1.16		0.3309	0.6307	0.5199	0.6198	0.7682	0.9752	0.5294	0.8923	0.7927	0.8241	0.6082	0.7249	0.3952	0.878		1.0074	0.9874	0.9348	1.0401	1.1395	1.0801	1.1988	1.1195		100	100	100	100	100	100
	498			2-oxoarginine*	LC/MS pos early	55072	C03771	HMDB0004225	558					1.40804	1.38	1.43	1.11	1.07		0.4027	0.6658	0.0544	0.3237	0.7887	0.9752	0.255	0.7909	0.0988	0.5115	0.4079	0.6317	0.7008	0.9742		0.7389	0.85	0.7136	0.9864	0.9293	0.7641	1.0945	1.0404		100	100	100	100	100	100
	499			citrulline	LC/MS pos early	2132	C00327	HMDB0000904	9750					1.04319	0.95	1.14	1.11	0.92		0.7737	0.7923	0.7447	0.6946	0.4244	0.9683	0.7491	0.9224	0.3999	0.7045	0.4158	0.638	0.7299	0.9875		1.0003	1.0152	1.0409	0.9894	1.0287	0.9598	1.0977	1.0435		100	100	100	100	100	100
	500			homoarginine	LC/MS pos early	22137	C01924	HMDB0000670	9085					1.2049	1.26	1.16	1.14	1.24		0.1895	0.51	0.2291	0.4828	0.5402	0.9683	0.2248	0.785	0.6517	0.7814	0.5919	0.717	0.198	0.7702		0.8692	0.878	0.7763	0.9798	1.0385	0.9621	1.1149	1.0473		100	100	100	100	100	100
	501			homocitrulline	LC/MS pos early	22138	C02427	HMDB0000679	65072					1.26549	1.24	1.29	1.03	0.99		0.8096	0.805	0.4218	0.5902	0.7786	0.9752	0.7244	0.9215	0.4166	0.7092	0.6956	0.7449	0.9784	1		1.0136	1.1415	1.0203	1.2626	1.1548	1.0068	1.3027	1.2827		93	93	88	100	100	100
	502			proline	LC/MS pos early	1898	C00148 C000763	HMDB0000162 HMDB0003411	145742;614;8988					1.19072	1.11	1.27	1.15	1.01		0.4443	0.6915	0.0607	0.335	0.6736	0.9695	0.3154	0.8187	0.0851	0.4911	0.375	0.6317	0.8161	0.9933		0.9076	0.9543	0.9028	1.0059	1.0339	0.9124	1.1554	1.0807		100	100	100	100	100	100
	505			dimethylarginine (SDMA + ADMA)	LC/MS pos early	36808	C21189 C03626	HMDB0003334 HMDB0001539	123831;169148					1.00867	1.07	0.96	1.01	1.12		0.2787	0.5945	0.7833	0.6984	0.3125	0.9683	0.3884	0.8592	0.5782	0.7552	0.955	0.8101	0.1632	0.7608		0.9922	0.9666	0.9358	0.9973	1.0264	1.0487	1.0042	1.0008		100	100	100	100	100	100
	506			N-acetylarginine	LC/MS pos early	33953	C02562	HMDB0004620	67427					1.11374	1.4	0.93	1.02	1.53		0.0631	0.3419	0.2458	0.4943	0.1385	0.9683	0.0794	0.6789	0.8019	0.8296	0.7621	0.7662	0.0275	0.6722		0.9917	0.9389	0.7833	1.0945	1.1573	1.2001	1.1144	1.1045		100	100	100	100	100	100
	511			N-acetylcitrulline	LC/MS neg	48434	C15532 C02851	HMDB0000856	656979					1.12097	0.96	1.23	1.87	1.47		0.0936	0.3906	0.4036	0.58	0.6017	0.9683	0.8317	0.9333	0.3107	0.6766	0.1005	0.507	0.426	0.8848		0.9432	0.7508	0.7651	0.7364	1.2497	1.1212	1.3782	1.0573		64	71	63	83	76	67
	512			N-acetylproline	LC/MS pos early	34387		HMDB0094701	322640					1.15565	1.35	1.04	1.28	1.66		0.0961	0.3962	0.2089	0.475	0.1192	0.9683	0.0621	0.666	0.8124	0.8306	0.9324	0.8031	0.0334	0.7064		0.92	0.8113	0.6915	0.9312	1.1719	1.1486	1.1952	1.0632		86	86	75	100	95	100
	515			N-delta-acetylornithine	LC/MS neg	43249	C00437	HMDB0003357	9920500					1.30371	1.42	1.18	0.8	0.96		0.4839	0.7113	0.1817	0.4558	0.6483	0.9683	0.2296	0.785	0.502	0.7293	0.3873	0.6317	0.8689	0.9953		0.9779	1.2076	0.9968	1.4184	1.0452	0.9589	1.1314	1.2749		100	100	100	100	100	100
	517			N2,N5-diacetylornithine	LC/MS neg	43591		HMDB0240345	65977					1.63907	2	1.34	0.82	1.23		0.7995	0.8012	0.0181	0.24	0.2021	0.9683	0.016	0.6452	0.3778	0.6972	0.4382	0.649	0.3036	0.8407		0.8686	1.1718	0.7806	1.563	1.1206	0.9567	1.2845	1.4237		86	86	75	100	95	100
	519			N-methylhydroxyproline**	LC/MS pos early	62068			9860390					1.03745	6.63	0.52	0.84	10.73		0.066	0.3451	0.8122	0.7055	0.0677	0.9683	0.2759	0.7934	0.1198	0.5373	0.9927	0.8124	0.016	0.6553		3.2546	2.1171	0.5547	3.6795	4.514	5.9545	3.0736	3.3765		50	50	25	83	76	83
	520			trans-4-hydroxyproline	LC/MS pos early	32306	C01157	HMDB0000725	5810					1.1262	0.89	1.36	1.5	0.98		0.2488	0.5626	0.4431	0.5945	0.2892	0.9683	0.8411	0.9333	0.174	0.5888	0.101	0.507	0.9486	1		1.08	1.0334	1.0918	0.975	1.2629	1.0682	1.4577	1.2163		100	100	100	100	100	100
	522			pro-hydroxy-pro	LC/MS pos early	35127		HMDB0006695	11902893					0.69021	1.02	0.5	0.83	1.71		0.8777	0.8233	0.1233	0.4204	0.1914	0.9683	0.8686	0.9357	0.0362	0.415	0.3828	0.6317	0.325	0.8486		1.4739	1.0985	1.0873	1.1098	1.3927	1.8605	0.9249	1.0173		100	100	100	100	100	100
	525			N-methylproline	LC/MS pos early	37431		HMDB0094696	643474					1.39262	14.07	0.65	0.8	17.16		0.1725	0.4948	0.6795	0.6706	0.1658	0.9683	0.2272	0.785	0.4579	0.7202	0.9864	0.8124	0.0683	0.7604		6.9038	5.7294	0.7604	10.6985	10.7888	13.0473	8.5304	9.6144		100	100	100	100	95	100
	526			N,N,N-trimethyl-alanylproline betaine (TMAP)	LC/MS neg	62947		HMDB0240365						0.807261	0.83	0.79	1.33	1.41		0.2065	0.5235	0.424	0.5906	0.7825	0.9752	0.4707	0.8715	0.6928	0.7877	0.2483	0.5865	0.5023	0.9074		1.2945	0.9857	1.0759	0.8954	1.3538	1.513	1.1946	1.045		100	100	100	100	100	100
	529			argininate*	LC/MS pos early	57461		HMDB0003148	160437					1.19611	1.19	1.2	1.21	1.21		0.1228	0.4414	0.5727	0.6316	0.7603	0.9752	0.8615	0.9338	0.5151	0.7379	0.1654	0.5365	0.3977	0.878		0.9622	0.9567	0.8719	1.0414	1.1564	1.0525	1.2603	1.1509		100	100	100	100	100	100
	533			dimethylguanidino valeric acid (DMGV)*	LC/MS pos early	62783			101535539					1.60332	0.78	2.69	2.64	0.76		0.3382	0.6401	0.2633	0.5029	0.1789	0.9683	0.8752	0.9381	0.0687	0.4655	0.0881	0.507	0.789	0.9875		0.7472	0.7529	0.8475	0.6582	1.1924	0.6469	1.7379	1.198		57	64	63	67	81	50
	535		Creatine Metabolism	guanidinoacetate	LC/MS polar	43802	C00581	HMDB0000128	763					1.22688	1.15	1.3	1.15	1.02		0.2313	0.5511	0.0884	0.3753	0.5649	0.9683	0.4355	0.8659	0.089	0.4969	0.1862	0.5485	0.671	0.9652		0.9287	0.9876	0.9175	1.0578	1.0805	0.94	1.221	1.1394		100	100	100	100	100	100
	536			creatine	LC/MS neg	27718	C00300	HMDB0000064	586					0.726668	0.93	0.61	1.16	1.76		0.2017	0.5235	0.1806	0.4558	0.2774	0.9683	0.8604	0.9338	0.0729	0.4655	0.8824	0.7933	0.1161	0.7608		1.4572	1.0185	1.0554	0.9817	1.4976	1.859	1.1361	1.0589		100	100	100	100	100	100
	537			creatinine	LC/MS pos early	513	C00791	HMDB0000562	588					1.07084	0.98	1.14	1.38	1.19		0.0369	0.3019	0.5105	0.6182	0.486	0.9683	0.9791	0.9453	0.3119	0.6766	0.0382	0.4189	0.3298	0.8528		0.9514	0.8639	0.8707	0.8571	1.1063	1.032	1.1806	1.0188		100	100	100	100	100	100
	546		Polyamine Metabolism	N-acetylputrescine	LC/MS pos early	37496	C02714	HMDB0002064	122356					0.887616	1.12	0.73	0.97	1.49		0.1521	0.4842	0.225	0.4825	0.0556	0.9683	0.6179	0.9145	0.0216	0.3417	0.6987	0.7459	0.0271	0.6722		1.2306	1.0476	0.9873	1.1079	1.2753	1.474	1.0766	1.0923		100	100	100	100	100	100
	552			N-acetyl-isoputreanine	LC/MS pos early	62309			131802901					1.2451	1.46	1.05	0.8	1.1		0.7609	0.7905	0.1416	0.433	0.2682	0.9683	0.0869	0.6904	0.7771	0.8226	0.2903	0.6091	0.586	0.9375		0.9743	1.138	0.9264	1.3496	1.0494	1.0223	1.0765	1.2131		100	100	100	100	100	100
	553			spermidine	LC/MS pos early	485	C00315	HMDB0001257	1102					1.10956	1.1	1.11	1.05	1.04		0.6318	0.7553	0.7172	0.686	0.6304	0.9683	0.9361	0.9453	0.5278	0.7385	0.4724	0.6608	0.999	1		0.9858	1.0163	0.9657	1.0669	1.0633	1.006	1.1206	1.0938		100	100	100	100	100	100
	558			(N(1) + N(8))-acetylspermidine	LC/MS pos early	57814	C00612 C01029	HMDB0001276 HMDB0002189	123689;496					1.00086	1.14	0.88	0.9	1.16		0.477	0.7064	0.8583	0.7242	0.214	0.9683	0.4707	0.8715	0.2857	0.6561	0.6835	0.7431	0.192	0.7682		1.0441	1.0332	0.967	1.0993	1.0559	1.1212	0.9907	1.045		100	100	100	100	100	100
	559			acisoga	LC/MS neg	43258		HMDB0061384	129397					1.23641	1.17	1.31	1.08	0.96		0.8695	0.8228	0.2803	0.5113	0.8504	0.9757	0.5466	0.8975	0.3412	0.6963	0.7914	0.7767	0.987	1		0.879	0.9718	0.8968	1.0468	0.9939	0.8611	1.1267	1.0868		79	86	75	100	90	83
	562			N1,N12-diacetylspermine	LC/MS pos early	52987	C03413	HMDB0002172	132680					0.993127	0.79	1.36	0.94	0.55		0.4005	0.6658	0.7948	0.7	0.3481	0.9683	0.6466	0.9164	0.3692	0.6963	0.9405	0.806	0.2351	0.8037		0.7566	0.8762	0.9784	0.774	0.6318	0.5349	0.7287	0.7514		29	36	38	33	38	17
	564			5-methylthioadenosine (MTA)	LC/MS pos early	1419	C00170	HMDB0001173	439176					1.09194	1.07	1.11	1.05	1.02		0.7762	0.7924	0.4019	0.5783	0.9101	0.978	0.5227	0.8891	0.5849	0.7562	0.8976	0.7951	0.7899	0.9875		1.0072	1.0343	0.997	1.0716	1.0727	1.0174	1.128	1.0998		100	100	100	100	100	100
	568			4-acetamidobutanoate	LC/MS pos early	1558	C02946	HMDB0003681	18189					0.957494	1.28	0.76	0.94	1.6		0.0758	0.362	0.7346	0.6919	0.0212	0.8525	0.1715	0.7773	0.0461	0.4259	0.6605	0.7405	0.0075	0.6167		1.1669	1.0241	0.8986	1.1496	1.2601	1.4351	1.085	1.1173		100	100	100	100	100	100
	571		Guanidino and Acetamido Metabolism	4-guanidinobutanoate	LC/MS pos early	15681	C01035	HMDB0003464	500					1.29623	1.57	1.11	1	1.42		0.2463	0.5626	0.1307	0.4239	0.3989	0.9683	0.1164	0.7227	0.6048	0.7636	0.8083	0.7794	0.1816	0.7608		0.8436	0.894	0.6968	1.0911	1.0431	0.9903	1.096	1.0935		100	100	100	100	100	100
	572			guanidinosuccinate	LC/MS polar	32446	C03139	HMDB0003157	439918					0.979165	1.09	0.88	0.91	1.12		0.9106	0.8282	0.9032	0.7394	0.5797	0.9683	0.7713	0.9278	0.6125	0.7645	0.6174	0.7279	0.7665	0.9875		1.1711	1.1546	1.1064	1.2028	1.1632	1.2358	1.0905	1.1467		93	86	88	83	95	100
	584		Glutathione Metabolism	cysteinylglycine	LC/MS pos early	35637	C01419	HMDB0000078	439498					0.859653	0.87	0.85	1.61	1.64		0.0312	0.3019	0.3914	0.5708	0.8371	0.9752	0.6601	0.9186	0.4255	0.7092	0.1343	0.507	0.1083	0.7608		1.2177	0.863	0.9236	0.8024	1.4014	1.5117	1.2912	1.0468		100	100	100	100	100	100
	585			cysteinylglycine disulfide*	LC/MS pos early	62103		HMDB0000709	22833544					0.71934	0.58	0.88	1.27	0.84		0.9201	0.8298	0.1863	0.4609	0.4677	0.9683	0.1715	0.7773	0.6471	0.7814	0.5351	0.6854	0.6735	0.9653		1.8909	1.6258	2.0519	1.1996	1.6253	1.7298	1.5209	1.3602		100	100	100	100	100	100
	586			cys-gly, oxidized	LC/MS pos early	18368			333293					0.591119	0.5	0.71	1.07	0.76		0.7904	0.7987	0.1515	0.4434	0.5786	0.9683	0.1827	0.7815	0.5004	0.7293	0.8274	0.7827	0.5819	0.9369		2.1483	1.8329	2.4374	1.2285	1.5852	1.8591	1.3113	1.2699		100	100	100	100	100	100
	587			5-oxoproline	LC/MS neg	1494	C01879 C02237	HMDB0000267	439685;7405					1.27842	1.38	1.17	0.83	0.99		0.1758	0.4958	0.0012	0.1476	0.239	0.9683	0.0031	0.5575	0.0843	0.4911	0.0616	0.4717	0.9021	1		0.9166	1.1002	0.9229	1.2775	0.9883	0.9103	1.0662	1.1718		100	100	100	100	100	100
	588			2-aminobutyrate	LC/MS neg	42374	C02356	HMDB0000452	80283					1.03247	0.87	1.2	1.33	0.96		0.44	0.6892	0.6713	0.6684	0.341	0.9683	0.7203	0.9215	0.3034	0.6745	0.1991	0.5495	0.9021	1		1.0288	0.9793	1.0479	0.9108	1.1117	1.0098	1.2136	1.0622		100	100	100	100	100	100
	590			2-hydroxybutyrate/2-hydroxyisobutyrate	LC/MS polar	52281	C21297 C05984	HMDB0000729 HMDB00008	4277439;440864					0.903081	0.75	1.06	1.39	0.98		0.4104	0.6679	0.6339	0.6611	0.4052	0.9683	0.3809	0.8586	0.7873	0.8236	0.2175	0.5684	0.995	1		1.1783	1.0394	1.1881	0.8907	1.2029	1.1685	1.2374	1.0641		100	100	100	100	100	100
	641		Lactoyl Amino Acid	N-lactoyl isoleucine	LC/MS neg	64879								1.94766	1.91	1.98	1.1	1.06		0.7385	0.7811	0.1459	0.4379	0.9547	0.978	0.3434	0.8387	0.2543	0.6505	0.7696	0.7695	0.8524	0.9953		0.7948	1.122	0.7714	1.4726	1.2209	0.8182	1.6235	1.548		86	86	88	83	90	83
	642			N-lactoyl leucine	LC/MS neg	64880								1.89253	1.74	2.03	1.26	1.08		0.5353	0.7265	0.0323	0.2894	0.6236	0.9683	0.2504	0.7884	0.0486	0.4259	0.4063	0.6317	0.9304	1		0.7695	1.0137	0.7392	1.2882	1.2121	0.7998	1.6244	1.4563		93	100	100	100	95	83
	644			N-lactoyl phenylalanine	LC/MS neg	64881								1.7151	2.08	1.47	1.05	1.49		0.4082	0.6679	0.1579	0.4527	0.6746	0.9695	0.2189	0.785	0.4486	0.7196	0.7579	0.7662	0.4037	0.878		0.9435	1.1672	0.7591	1.5753	1.3944	1.1279	1.661	1.6182		100	100	100	100	100	100
	645			N-lactoyl tyrosine	LC/MS neg	64882								1.74242	2.01	1.55	1.06	1.38		0.4811	0.7088	0.0898	0.3753	0.5946	0.9683	0.1348	0.7398	0.3698	0.6963	0.8961	0.7951	0.4078	0.878		0.8184	1.035	0.6882	1.3819	1.2093	0.9486	1.47	1.426		79	93	88	100	86	67
	646			N-lactoyl valine	LC/MS neg	64883								1.62259	1.46	1.79	1.16	0.95		0.6097	0.747	0.0917	0.3768	0.5247	0.9683	0.4672	0.8715	0.0836	0.4904	0.3914	0.6317	0.9323	1		0.8243	1.0437	0.8475	1.24	1.118	0.801	1.435	1.3375		100	100	100	100	100	100
	648	Peptide	Gamma-glutamyl Amino Acid	gamma-glutamylalanine	LC/MS pos early	37063	C03738	HMDB0029142	440103					1.83727	2.17	1.59	0.98	1.33		0.597	0.743	0.0015	0.1476	0.63	0.9683	0.0122	0.6452	0.0319	0.3911	0.9717	0.811	0.4986	0.9029		0.5506	0.747	0.4718	1.0222	0.8152	0.6294	1.001	1.0116		36	50	25	83	81	50
	650			gamma-glutamylglutamate	LC/MS pos early	36738	C05282	HMDB0011737	92865					2.00686	2.14	1.86	0.83	0.95		0.9872	0.8367	0.0417	0.2987	0.6079	0.9683	0.0861	0.6904	0.2374	0.6415	0.709	0.7483	0.7224	0.9846		1.064	1.7142	1.0909	2.3375	1.485	1.037	1.933	2.1353		100	100	100	100	100	100
	651			gamma-glutamylglutamine	LC/MS pos early	2730	C05283	HMDB0011738	150914					1.13098	1.36	0.94	0.82	1.18		0.9691	0.8346	0.3597	0.5615	0.0973	0.9683	0.0865	0.6904	0.5629	0.7508	0.1993	0.5495	0.2711	0.8287		1.0299	1.1136	0.9449	1.2824	1.0811	1.115	1.0472	1.1648		100	100	100	100	100	100
	652			gamma-glutamylglycine	LC/MS pos early	33949		HMDB0011667	100099					1.67118	2.17	1.26	0.7	1.2		0.4595	0.6967	0.0059	0.1631	0.2778	0.9683	0.0105	0.6452	0.1744	0.5888	0.1743	0.5418	0.813	0.9933		0.7603	1.0937	0.6899	1.4976	0.9372	0.8308	1.0437	1.2706		100	100	100	100	100	100
	653			gamma-glutamylhistidine	LC/MS pos early	18245		HMDB0029151	7017195					1.36245	1.63	1.13	0.8	1.15		0.9937	0.8378	0.0243	0.2533	0.1591	0.9683	0.0157	0.6452	0.4926	0.7286	0.2902	0.6091	0.338	0.8598		0.9091	1.109	0.8446	1.3735	1.0387	0.9737	1.1037	1.2386		100	100	100	100	100	100
	654			gamma-glutamylisoleucine*	LC/MS pos early	34456		HMDB0011170	22885096					1.5	1.61	1.41	1.03	1.18		0.8519	0.8135	0.0498	0.3184	0.6525	0.9683	0.1041	0.7173	0.2431	0.6449	0.8429	0.7865	0.6692	0.9652		0.8602	1.0315	0.7904	1.2725	1.1191	0.9301	1.3081	1.2903		100	100	100	100	100	100
	655			gamma-glutamylleucine	LC/MS pos early	18369		HMDB0011171	151023					1.40923	1.45	1.37	1.06	1.12		0.6716	0.7662	0.0452	0.3072	0.6787	0.9717	0.1029	0.7173	0.22	0.6276	0.9941	0.8124	0.5744	0.9351		0.8235	0.9517	0.7769	1.1265	1.0322	0.8701	1.1944	1.1605		100	100	100	100	100	100
	656			gamma-glutamyl-alpha-lysine	LC/MS pos early	55015			65254					1.52449	1.84	1.27	0.86	1.25		0.7664	0.791	0.0196	0.24	0.2742	0.9683	0.0227	0.6452	0.3198	0.6801	0.5462	0.6901	0.3506	0.8621		0.8921	1.1285	0.7939	1.4631	1.1236	0.9902	1.2569	1.36		100	100	100	100	100	100
	658			gamma-glutamylmethionine	LC/MS pos early	44872		HMDB0029155	7009567					1.48525	1.67	1.34	1.02	1.27		0.4476	0.6928	0.0144	0.237	0.3932	0.9683	0.0271	0.6452	0.2048	0.6094	0.9427	0.807	0.2812	0.8294		0.7897	0.9291	0.697	1.1611	1.0336	0.8823	1.1848	1.1729		100	100	100	100	100	100
	659			gamma-glutamylphenylalanine	LC/MS pos early	33422		HMDB0000594	111299					1.07123	1.13	1.02	1.07	1.18		0.4457	0.6926	0.4162	0.5876	0.5067	0.9683	0.3234	0.826	0.9099	0.8491	0.9404	0.806	0.3401	0.8608		0.9195	0.8988	0.8439	0.9537	1.0057	0.9952	1.0162	0.985		100	100	100	100	100	100
	660			gamma-glutamylthreonine	LC/MS pos early	33364		HMDB0029159	76078708					1.3295	1.51	1.17	0.89	1.15		0.7127	0.7761	0.0243	0.2533	0.2204	0.9683	0.0212	0.6452	0.4084	0.7092	0.5147	0.6776	0.2849	0.8317		0.9815	1.1468	0.914	1.3796	1.1396	1.049	1.2301	1.3049		100	100	100	100	100	100
	661			gamma-glutamyltryptophan	LC/MS neg	33947		HMDB0029160	3989307					1.06393	1.05	1.08	1.09	1.07		0.3649	0.6551	0.6976	0.6788	0.9888	0.9807	0.8015	0.9331	0.7626	0.8181	0.489	0.6726	0.5481	0.9291		0.9635	0.9559	0.9317	0.9801	1.0326	0.9952	1.07	1.0251		100	93	100	83	95	100
	662			gamma-glutamyltyrosine	LC/MS neg	2734		HMDB0011741	94340					1.22026	1.27	1.17	0.93	1.01		0.727	0.7794	0.1319	0.4239	0.5758	0.9683	0.1663	0.7695	0.467	0.7202	0.4964	0.6731	0.8871	0.9973		0.9103	1.0293	0.9077	1.1508	0.9919	0.913	1.0708	1.1108		100	100	100	100	100	100
	663			gamma-glutamylvaline	LC/MS pos early	43829		HMDB0011172	7015683					1.54199	1.59	1.5	1.02	1.08		0.9432	0.8342	0.0446	0.3072	0.7461	0.9752	0.1146	0.7227	0.1949	0.6009	0.8497	0.7865	0.791	0.9875		0.8312	1.0346	0.7994	1.2697	1.0784	0.8629	1.2938	1.2817		100	100	100	100	100	100
	664			gamma-glutamylserine	LC/MS pos early	54914		HMDB0029158	22844748					1.39297	1.43	1.36	0.9	0.94		0.5406	0.7289	0.0255	0.2567	0.7638	0.9752	0.0852	0.6904	0.1354	0.5648	0.4944	0.6731	0.8337	0.9953		0.8245	1.0299	0.8483	1.2114	0.9431	0.8006	1.0855	1.1485		100	100	100	100	100	100
	665			gamma-glutamylcitrulline*	LC/MS pos early	62104								1.13178	1.14	1.12	1.01	1.03		0.9614	0.8346	0.383	0.5687	0.9382	0.978	0.523	0.8891	0.5495	0.7437	0.9826	0.8124	0.9327	1		0.9721	1.0269	0.9597	1.0942	1.0454	0.9845	1.1063	1.1002		100	100	100	100	100	100
	666			gamma-glutamyl-2-aminobutyrate	LC/MS pos early	37092								1.78501	2.03	1.57	0.87	1.13		0.4931	0.7172	0.0136	0.237	0.6684	0.9683	0.0495	0.6507	0.1117	0.5212	0.846	0.7865	0.4558	0.8977		0.8163	1.1618	0.7677	1.556	1.1115	0.8648	1.3582	1.4571		100	100	100	100	100	100
	778		Dipeptide	cyclo(leu-pro)	LC/MS pos early	37104		HMDB0034276	7074739					1.14839	0.8	1.49	1.89	1.01		0.2757	0.592	0.9959	0.7519	0.5987	0.9683	0.7263	0.9215	0.6899	0.7876	0.2276	0.5797	0.7009	0.9742		1.1018	0.9857	1.0948	0.8765	1.3814	1.1088	1.6541	1.2653		100	100	100	100	100	100
	799			cyclo(pro-val)	LC/MS pos early	49795			98951					1.12899	1.72	0.82	0.9	1.9		0.0953	0.3949	0.7291	0.6909	0.1344	0.9683	0.2151	0.785	0.3799	0.6972	0.8913	0.7951	0.0365	0.7064		1.2404	1.1638	0.8563	1.4713	1.4771	1.6245	1.3296	1.4004		100	100	100	100	100	100
	845			glycylvaline	LC/MS pos early	18357		HMDB0028854	2724807					1.56539	0.32	7.79	4.81	0.2		0.5004	0.7176	0.8227	0.7081	0.0482	0.9456	0.2286	0.785	0.0969	0.5077	0.3104	0.6121	0.0758	0.7604		1.8297	2.018	3.0507	0.9853	2.6759	0.6087	4.7431	2.8642		100	100	100	100	100	100
	850			histidylalanine	LC/MS pos early	42027		HMDB0028878	101180					1.38704	1.48	1.18	0.34	0.43		0.0151	0.2737	0.5127	0.6185	0.5248	0.9683	0.3879	0.8592	0.9887	0.8587	0.022	0.3835	0.205	0.7795		1.5975	2.7735	2.24	3.307	1.0398	0.9551	1.1246	2.2158		100	93	100	83	100	100
	869			isoleucylglycine	LC/MS pos early	40008		HMDB0028907	342532					1.04568	1.18	0.87	0.56	0.77		0.0014	0.1179	0.9474	0.7446	0.1719	0.9683	0.3334	0.833	0.3256	0.6865	0.0009	0.1193	0.168	0.7608		1.1078	1.369	1.2541	1.4838	0.8973	0.9615	0.8331	1.1584		93	100	100	100	81	83
	883			leucylalanine	LC/MS neg	40010		HMDB0028922	81721					1.08129	1.11	1.03	0.58	0.62		0.0508	0.333	0.9403	0.7446	0.8632	0.9757	0.8684	0.9357	0.9417	0.8511	0.1732	0.5413	0.149	0.7608		1.1588	1.5119	1.4332	1.5907	0.8998	0.8844	0.9153	1.253		100	100	100	100	100	100
	888			leucylglycine	LC/MS pos early	40045		HMDB0028929	79070					2.19479	2.49	1.36	0.19	0.35		0.004	0.1768	0.1319	0.4239	0.5947	0.9683	0.1719	0.7773	0.4546	0.7202	0.0102	0.2852	0.0942	0.7608		1.7167	4.4355	2.5429	6.3281	1.049	0.8905	1.2076	3.7678		93	100	100	100	76	83
	937			phenylalanylalanine	LC/MS pos early	41374		HMDB0028988	5488196					1.15012	1.48	0.8	0.51	0.94		0.0699	0.3528	0.7163	0.6857	0.1502	0.9683	0.2258	0.785	0.412	0.7092	0.0173	0.3535	0.7891	0.9875		0.9679	1.2374	0.9981	1.4767	0.8438	0.9378	0.7498	1.1132		71	79	75	83	57	67
	942			phenylalanylglycine	LC/MS pos early	41370		HMDB0028995	6992304					1.41439	1.53	1.28	0.75	0.89		0.4347	0.6863	0.1764	0.4558	0.8401	0.9752	0.2953	0.7961	0.383	0.6972	0.4611	0.6598	0.696	0.9737		1.0437	1.3963	1.1032	1.6894	1.1236	0.9842	1.263	1.4762		93	93	88	100	100	100
	963			prolylglycine	LC/MS pos early	40703		HMDB0011178	6426709					1.04948	1.57	0.71	0.71	1.57		0.9987	0.8381	0.5936	0.6392	0.1403	0.9683	0.1784	0.7795	0.4705	0.7202	0.2646	0.5953	0.3184	0.8429		1.2772	1.281	0.9955	1.5666	1.3365	1.5589	1.1142	1.3404		100	100	100	100	100	100
	969			prolylproline	LC/MS pos early	40731		HMDB0011180	263469					1.29127	1.29	1.28	0.51	0.51		0.0765	0.362	0.2023	0.4716	0.6686	0.9683	0.2534	0.7909	0.5186	0.7385	0.0994	0.507	0.3548	0.8621		1.501	2.2761	1.9838	2.5683	1.1631	1.0181	1.3081	1.9382		100	100	100	100	95	100
	1002			threonylphenylalanine	LC/MS neg	31530		HMDB0029068	7010580					2.06688	2.03	2.14	0.54	0.52		0.2695	0.5855	0.123	0.4204	0.5292	0.9683	0.1462	0.7398	0.4818	0.7273	0.1963	0.5495	0.7456	0.9875		0.6908	1.3806	0.9108	1.8504	0.7379	0.4707	1.0052	1.4278		50	50	38	67	57	67
	1050			valylglycine	LC/MS pos early	40475		HMDB0029127	136487					1.20725	1.36	0.99	0.51	0.69		0.0024	0.149	0.2524	0.499	0.2442	0.9683	0.1246	0.7227	0.9876	0.8587	0.002	0.2198	0.1642	0.7608		1.0702	1.4901	1.2638	1.7164	0.8722	0.8766	0.8677	1.292		93	100	100	100	95	83
	1053			valylleucine	LC/MS pos early	39994		HMDB0029131	352039					1.23617	1.2	1.3	0.54	0.5		0.0453	0.3275	0.1735	0.4558	0.6795	0.9717	0.2338	0.7875	0.4696	0.7202	0.0699	0.4717	0.2715	0.8287		0.9887	1.4509	1.3176	1.5841	0.7601	0.6599	0.8603	1.2222		93	93	88	100	95	100
	1063			leucylglutamine*	LC/MS pos early	48189		HMDB0028927	4305457					1.60402	1.83	1.05	0.24	0.41		0.0357	0.3019	0.2795	0.5113	0.4189	0.9683	0.2073	0.785	0.8342	0.8351	0.0309	0.4109	0.3629	0.8621		1.5506	3.1141	2.2023	4.026	0.9236	0.8989	0.9483	2.4872		93	86	88	83	81	100
	1084		Polypeptide	bradykinin, des-arg(9)	LC/MS neg	34420	C00306	HMDB04246	105044					0.790594	0.36	1.97	2	0.37		0.7933	0.7998	0.7994	0.7014	0.2478	0.9683	0.3434	0.8387	0.4945	0.7286	0.4982	0.6731	0.3408	0.8609		1.0716	1.0665	1.5685	0.5644	0.8523	0.5746	1.13	0.8472		50	50	50	50	62	50
	1087			HXGXA*	LC/MS neg	62508			132993924					1.09916	1.14	0.93	0.22	0.27		0.0256	0.2868	0.4125	0.5843	0.6419	0.9683	0.3897	0.8592	0.7883	0.8236	0.0429	0.4336	0.2176	0.7921		1.2787	2.1646	2.0183	2.3109	0.5196	0.539	0.5001	1.4055		43	64	50	83	52	33
	1088			HWESASXX*	LC/MS neg	57711			85328684					1.18723	1.41	0.91	0.51	0.79		0.1697	0.4944	0.5416	0.6241	0.4774	0.9683	0.3769	0.8566	0.9395	0.8511	0.1211	0.507	0.6482	0.955		1.1996	1.6129	1.3403	1.8855	1.011	1.0589	0.963	1.4242		100	100	100	100	100	100
	1153			glu-gly-asn-val**	LC/MS neg	62917								0.770342	0.24	2.63	3.14	0.29		0.705	0.776	0.3778	0.5653	0.0226	0.8525	0.0346	0.6452	0.2677	0.6561	0.1404	0.5172	0.0715	0.7604		1.8005	1.7363	2.8022	0.6704	1.4512	0.7987	2.1036	1.387		100	100	100	100	95	100
	1174		Fibrinogen Cleavage Peptide	fibrinopeptide A*	LC/MS pos early	33084			25081464					0.940377	0.72	1.19	1.41	0.86		0.9044	0.8282	0.4057	0.5804	0.2513	0.9683	0.1869	0.782	0.8085	0.8306	0.3407	0.6249	0.4873	0.8993		1.0885	1.0107	1.1723	0.8491	1.1013	1.0047	1.198	1.0236		100	100	100	100	95	100
	1175			fibrinopeptide A (2-15)**	LC/MS neg	62809			25078015					0.861271	0.66	1.18	1.13	0.63		0.341	0.6415	0.5761	0.6316	0.2065	0.9683	0.2226	0.785	0.5905	0.7598	0.8101	0.7794	0.1401	0.7608		1.3184	1.3402	1.6164	1.064	1.1138	1.0205	1.2071	1.1355		100	100	100	100	100	100
	1176			fibrinopeptide A (3-15)**	LC/MS neg	62808			25078015					0.953622	0.8	1.19	0.98	0.66		0.1652	0.4944	0.7591	0.6959	0.3685	0.9683	0.4186	0.86	0.6542	0.7823	0.7054	0.7475	0.1276	0.7608		1.2398	1.3468	1.4983	1.1952	1.0753	0.9814	1.1693	1.1823		100	100	100	100	100	100
	1177			fibrinopeptide A (4-15)**	LC/MS neg	62810			25078015					1.02185	0.8	1.36	1.09	0.65		0.2605	0.575	0.9506	0.7446	0.2268	0.9683	0.4382	0.8659	0.3388	0.6956	0.9485	0.8091	0.1206	0.7608		1.1168	1.2242	1.3575	1.0908	1.0338	0.8762	1.1915	1.1412		100	100	100	100	100	100
	1178			fibrinopeptide A (3-16)**	LC/MS neg	62811			25078015					0.978286	1.21	0.78	0.75	1.17		0.5652	0.743	0.8366	0.7141	0.1953	0.9683	0.4598	0.8715	0.2594	0.6517	0.163	0.5365	0.622	0.955		1.1237	1.1445	1.0338	1.2553	1.0784	1.2136	0.9433	1.0993		100	100	100	100	100	100
	1179			fibrinopeptide A (5-16)*	LC/MS neg	62148								0.835502	0.89	0.78	0.95	1.08		0.7216	0.7763	0.3137	0.5314	0.481	0.9683	0.8362	0.9333	0.2022	0.6058	0.4272	0.6451	0.814	0.9933		1.2371	1.1269	1.1922	1.0617	1.1438	1.2821	1.0056	1.0336		100	100	100	100	100	100
	1180			fibrinopeptide A (7-16)*	LC/MS neg	62149								0.810397	0.79	0.83	1.1	1.05		0.8076	0.8041	0.179	0.4558	0.7511	0.9752	0.4845	0.8715	0.2131	0.6179	0.6743	0.7426	0.9605	1		1.1677	1.022	1.1416	0.9024	1.092	1.1938	0.9902	0.9463		100	100	100	100	100	100
	1181			fibrinopeptide A (8-16)**	LC/MS neg	62812			25078015					0.797106	0.8	0.79	1.02	1.03		0.6206	0.7521	0.1709	0.455	0.7316	0.9752	0.4842	0.8715	0.1995	0.6021	0.5303	0.6849	0.9185	1		1.2095	1.0741	1.1933	0.9549	1.0995	1.2257	0.9733	0.9641		100	100	100	100	100	100
	1182			fibrinopeptide A, des-ala(1)*	LC/MS neg	31548			132993922					0.889056	0.99	0.8	0.94	1.16		0.8428	0.8098	0.594	0.6392	0.3647	0.9683	0.7997	0.9331	0.2824	0.6561	0.4073	0.6317	0.6325	0.955		1.1303	1.042	1.0471	1.0369	1.0932	1.2136	0.9729	1.0049		100	100	100	100	100	100
	1183			fibrinopeptide A, phosphono-ser(3)*	LC/MS neg	57712			132993923					0.672143	0.73	0.61	0.89	1.06		0.9646	0.8346	0.039	0.2939	0.5872	0.9683	0.2895	0.7952	0.0512	0.4379	0.708	0.7483	0.6933	0.9733		1.3878	1.1686	1.3488	0.9883	1.152	1.4268	0.8773	0.9328		100	100	100	100	95	100
	1194			fibrinopeptide B (1-9)**	LC/MS neg	62816			16132131					1.25914	0.74	1.99	1.93	0.71		0.4081	0.6679	0.7563	0.6953	0.2226	0.9683	0.5366	0.8958	0.2516	0.65	0.1283	0.507	0.7872	0.9875		1.1075	1.1236	1.2938	0.9535	1.3784	0.9212	1.8356	1.3945		100	100	100	100	100	100
	1195			fibrinopeptide B (1-11)**	LC/MS neg	62815			16132131					0.751878	0.53	1.13	1.25	0.59		0.5906	0.743	0.147	0.4379	0.1188	0.9683	0.0465	0.6452	0.9307	0.8506	0.4323	0.647	0.1596	0.7608		1.1716	1.1283	1.4741	0.7826	0.9242	0.8691	0.9792	0.8809		100	100	100	100	100	100
	1196			fibrinopeptide B (1-12)**	LC/MS neg	62814			16132131					0.914682	0.92	0.91	0.94	0.95		0.705	0.776	0.5674	0.6291	0.4671	0.9683	0.3847	0.8592	0.9063	0.8491	0.7922	0.7767	0.4588	0.8977		1.0033	0.9884	1.029	0.9478	0.9325	0.9775	0.8875	0.9177		100	100	100	100	100	100
	1197			fibrinopeptide B (1-13)**	LC/MS neg	62813								0.813506	0.8	0.83	1.02	0.99		0.8524	0.8135	0.139	0.43	0.9218	0.978	0.3483	0.841	0.2342	0.6358	0.9474	0.809	0.8488	0.9953		1.2306	1.1123	1.2353	0.9893	1.1194	1.2258	1.013	1.0011		100	100	100	100	100	100
	1201		Acetylated Peptides	phenylacetylcarnitine	LC/MS pos early	48425			101724840					0.653627	0.7	0.63	1.77	1.97		0.215	0.5301	0.1744	0.4558	0.9784	0.9807	0.3491	0.841	0.3147	0.6781	0.3396	0.6247	0.4124	0.878		1.7894	1.0257	1.2064	0.8449	1.9333	2.3724	1.4943	1.1696		100	100	100	100	95	100
	1203			phenylacetylglutamate	LC/MS neg	52925		HMDB0059772	11579826					0.360174	1.19	0.22	1.1	5.91		0.4466	0.6926	0.7927	0.6995	0.6524	0.9683	0.8995	0.9404	0.5931	0.7607	0.8142	0.7794	0.4172	0.8811		3.6027	1.1399	1.0431	1.2367	3.7604	6.1623	1.3585	1.2976		93	100	100	100	90	83
	1204			phenylacetylglutamine	LC/MS neg	35126	C04148	HMDB0006344	92258					0.658806	0.93	0.53	1.23	2.15		0.1589	0.4918	0.1789	0.4558	0.6976	0.9717	0.5144	0.8837	0.1946	0.6009	0.4364	0.649	0.2275	0.7994		1.4842	0.91	0.9415	0.8786	1.5519	2.0269	1.0769	0.9778		100	93	100	83	100	100
	1206			4-hydroxyphenylacetylglutamine	LC/MS neg	55017								0.806919	1.18	0.67	1.57	2.75		0.2068	0.5235	0.5381	0.6238	0.6941	0.9717	0.4991	0.8761	0.8668	0.8434	0.5083	0.6752	0.2666	0.8277		1.4424	0.8376	0.7685	0.9067	1.7687	2.1163	1.4211	1.1639		79	79	63	100	90	100
	1223		Modified Peptides	pyroglutamylglycine	LC/MS neg	31522			152981					1.23941	0.72	2.02	1.85	0.66		0.4542	0.6951	0.7618	0.6959	0.2089	0.9683	0.5168	0.8853	0.2424	0.6444	0.1359	0.507	0.7269	0.9862		1.2105	1.2549	1.4584	1.0514	1.4559	0.9627	1.9492	1.5003		100	100	100	100	100	100
	1235			pyroglutamylvaline	LC/MS neg	32394			152416					1.19468	1.25	1.13	0.8	0.88		0.0499	0.3322	0.0447	0.3072	0.6931	0.9717	0.1049	0.7173	0.2135	0.6179	0.0771	0.4812	0.2793	0.8294		0.9143	1.0952	0.9747	1.2156	0.9115	0.8539	0.9691	1.0923		93	93	88	100	100	100
	1236			N,N-dimethyl-pro-pro	LC/MS pos early	64571								0.966894	0.96	0.97	1.08	1.06		0.9884	0.8367	0.8542	0.7224	0.5608	0.9683	0.7889	0.9331	0.5662	0.7508	0.6702	0.7408	0.6888	0.9699		1.0693	1.0168	1.0372	0.9964	1.0863	1.1013	1.0714	1.0339		100	100	100	100	100	100
	1237	Carbohydrate	Glycolysis, Gluconeogenesis, and Pyruvate Metabolism	1,5-anhydroglucitol (1,5-AG)	LC/MS neg	20675	C07326	HMDB0002712	64960					0.837386	0.81	0.87	1.02	0.95		0.7393	0.7811	0.202	0.4716	0.9071	0.978	0.3478	0.841	0.3806	0.6972	0.8711	0.7927	0.7631	0.9875		1.0897	1.0103	1.1164	0.9043	0.9919	1.0631	0.9206	0.9125		100	100	100	100	100	100
	1240			glucose	LC/MS polar	48152	C00031	HMDB0000122	5793					1.0001	0.9	1.09	1.31	1.08		0.0134	0.2556	0.8266	0.7093	0.1584	0.9683	0.2723	0.7934	0.3656	0.6963	0.0046	0.2313	0.435	0.8882		1.0258	0.9366	0.9865	0.8866	1.1151	1.0651	1.1652	1.0259		100	100	100	100	100	100
	1256			pyruvate	LC/MS polar	48990	C00022	HMDB0000243	1060					1.34679	1.08	1.6	1.57	1.05		0.2362	0.5569	0.1719	0.4558	0.4391	0.9683	0.6829	0.9194	0.1118	0.5212	0.1454	0.523	0.7779	0.9875		1.0153	1.0257	0.9882	1.0632	1.357	1.0425	1.6715	1.3674		100	100	100	100	100	100
	1257			lactate	LC/MS polar	527	C00186	HMDB0000190	612					1.37037	1.27	1.48	1.11	0.95		0.838	0.8098	0.0302	0.2794	0.6022	0.9683	0.2508	0.7884	0.0441	0.4259	0.5865	0.7147	0.8313	0.9953		0.9739	1.1317	0.9979	1.2654	1.1768	0.9499	1.4038	1.3346		100	100	100	100	100	100
	1260			glycerate	LC/MS polar	1572	C00258	HMDB0006372 HMDB0000139	752;439194					0.982505	1.01	0.94	0.66	0.72		0.0245	0.2868	0.7062	0.6815	0.8621	0.9757	0.7119	0.9215	0.8787	0.8441	0.1108	0.507	0.0986	0.7608		1.0746	1.2601	1.2508	1.2694	0.8703	0.8983	0.8422	1.0558		100	100	100	100	100	100
	1278		Pentose Metabolism	ribose	LC/MS polar	1471	C00121	HMDB0000283	5779					0.663678	0.72	0.62	1.3	1.51		0.1689	0.4944	0.0983	0.3843	0.5983	0.9683	0.4377	0.8659	0.1035	0.5152	0.5158	0.6778	0.2025	0.7751		1.3496	0.9266	1.0749	0.7784	1.3187	1.6244	1.0131	0.8957		93	79	88	67	86	100
	1279			ribitol	LC/MS polar	15772	C00532 C01904 C00474 C00379	HMDB0002917 HMDB0000508 HMDB0001851 HMDB0000568	6912					1.00988	0.92	1.11	1.07	0.89		0.8226	0.8082	0.9549	0.7451	0.2624	0.9683	0.4275	0.8612	0.4222	0.7092	0.4974	0.6731	0.366	0.8621		0.9512	0.9687	1.0079	0.9295	0.9431	0.8946	0.9916	0.9606		100	100	100	100	100	100
	1280			ribonate	LC/MS polar	27731	C01685	HMDB0000867	5460677					1.07471	0.95	1.2	1.22	0.97		0.4952	0.7176	0.5795	0.6333	0.4583	0.9683	0.8989	0.9404	0.3331	0.6951	0.288	0.6091	0.9677	1		1.0052	0.9963	1.0202	0.9724	1.0891	0.9901	1.1881	1.0803		100	100	100	100	100	100
	1284			xylose	LC/MS polar	15581	C00181	HMDB0000098	135191					1.47155	1.56	1.37	0.76	0.86		0.7504	0.7835	0.9728	0.7485	0.9996	0.983	0.9815	0.9453	0.9799	0.8575	0.8116	0.7794	0.8307	0.9953		1.1248	1.5446	1.2077	1.8816	1.2354	1.042	1.4289	1.6552		86	86	88	83	81	83
	1286			arabinose	LC/MS polar	575	C00216	HMDB0029942	66308					1.06792	0.74	1.74	1.16	0.49		0.0867	0.3823	0.6883	0.6756	0.0213	0.8525	0.185	0.7815	0.0418	0.4259	0.6259	0.73	0.0084	0.6553		0.8068	0.9409	1.0822	0.7996	0.7275	0.5314	0.9236	0.8616		86	93	88	100	81	83
	1294			arabitol/xylitol	LC/MS polar	48885	C00542 C01904 C00379	HMDB0002917 HMDB0001851 HMDB0000568	6912;94154					1.2034	1.2	1.21	0.92	0.91		0.3114	0.6205	0.052	0.3184	0.9798	0.9807	0.1796	0.7795	0.1446	0.5766	0.4349	0.6486	0.5058	0.9077		0.9405	1.0818	0.9848	1.1787	0.9906	0.8962	1.0849	1.1318		100	100	100	100	100	100
	1300			arabonate/xylonate	LC/MS polar	48255	C00502 C05411	HMDB0000539	122045;6602431					1.32198	1.18	1.5	1.06	0.83		0.6028	0.743	0.0456	0.3072	0.525	0.9683	0.3416	0.8372	0.0495	0.4259	0.9305	0.8031	0.439	0.8882		0.9538	1.1316	1.0403	1.223	1.0831	0.8672	1.2989	1.2609		100	100	100	100	100	100
	1307			lyxonate	LC/MS polar	61858		HMDB0060255						1.13228	1.09	1.19	0.83	0.76		0.0457	0.3275	0.3156	0.532	0.7742	0.9752	0.6274	0.9145	0.3337	0.6951	0.1886	0.5485	0.1218	0.7608		1.0478	1.2431	1.1905	1.2956	0.9912	0.9051	1.0772	1.1864		100	100	100	100	100	100
	1317		Glycogen Metabolism	maltose	LC/MS polar	15586	C00208	HMDB0000163	10991489					0.819969	0.52	1.34	1.5	0.58		0.7936	0.7998	0.4596	0.5984	0.1532	0.9683	0.1478	0.7398	0.5955	0.7607	0.375	0.6317	0.2552	0.8246		1.3381	1.2849	1.6927	0.8771	1.1504	0.9836	1.3172	1.0972		100	100	100	100	95	100
	1343		Disaccharides and Oligosaccharides	sucrose	LC/MS polar	1519	C00089	HMDB0000258	5988					0.71387	0.79	0.64	0.81	0.99		0.9433	0.8342	0.8693	0.7291	0.7425	0.9752	0.9122	0.9453	0.7116	0.7964	0.8467	0.7865	0.7886	0.9875		1.615	1.4491	1.6227	1.2755	1.3188	1.6074	1.0303	1.1529		64	64	50	83	86	83
	1364		Fructose, Mannose and Galactose Metabolism	fructose	LC/MS polar	48195	C00095	HMDB0000660	2723872					0.944256	0.97	0.92	1	1.05		0.8757	0.8233	0.492	0.6111	0.8771	0.9757	0.7199	0.9215	0.5278	0.7385	0.9989	0.8124	0.8347	0.9953		1.1786	1.1317	1.1482	1.1151	1.1599	1.2091	1.1107	1.1129		100	100	100	100	100	100
	1369			mannitol/sorbitol	LC/MS polar	46142	C00392 C00794	HMDB0000247 HMDB0000765	6251;5780					1.05716	1.43	0.91	1.59	2.5		0.3862	0.6614	0.8455	0.7191	0.1891	0.9683	0.3098	0.8134	0.3966	0.704	0.7302	0.7552	0.1462	0.7608		1.8876	1.3086	1.0779	1.5394	2.5744	2.6972	2.4515	1.9955		100	100	100	100	100	100
	1370			mannose	LC/MS polar	48153	C00159 C02209 C00936	HMDB0000169	185698;82308;18950;439680					0.801169	0.73	0.86	1.29	1.09		0.1082	0.4107	0.0137	0.237	0.4945	0.9683	0.0341	0.6452	0.1594	0.5888	0.0885	0.507	0.5232	0.9172		1.1291	0.9338	1.078	0.7896	1.0999	1.1802	1.0195	0.9046		100	100	100	100	100	100
	1390			galactonate	LC/MS polar	27719	C15930 C00880	HMDB0000565	12310779;128869					1.28379	1.74	1.02	1	1.71		0.661	0.7632	0.2132	0.4771	0.2346	0.9683	0.1058	0.7203	0.9652	0.856	0.5681	0.7027	0.2754	0.8294		1.0335	1.0447	0.7634	1.3259	1.3156	1.3035	1.3277	1.3268		100	100	100	100	100	100
	1424		Aminosugar Metabolism	glucuronate	LC/MS polar	15443	C16245	HMDB0000127	441478;94715;23677976;65041;444791					1.31461	1.6	1	0.57	0.91		0.453	0.6951	0.4107	0.5835	0.3883	0.9683	0.2604	0.7909	0.9756	0.8575	0.2293	0.5801	0.939	1		1.0715	1.4551	1.1191	1.7911	1.025	1.0239	1.0262	1.4086		100	100	100	100	100	100
	1436			N-acetylneuraminate	LC/MS pos early	32377	C00270	HMDB0000230	439197					0.953577	0.92	0.99	1.02	0.93		0.6327	0.7553	0.4394	0.5945	0.644	0.9683	0.4082	0.8592	0.8138	0.8306	0.9904	0.8124	0.5289	0.921		1.0706	1.0603	1.1073	1.0133	1.0312	1.0338	1.0286	1.0209		100	100	100	100	100	100
	1448			N-acetylglucosaminylasparagine	LC/MS pos early	48149	C04540	HMDB0000489	123826					0.822962	0.88	0.78	1.12	1.27		0.197	0.5234	0.1081	0.4006	0.7622	0.9752	0.3723	0.8515	0.1517	0.5888	0.453	0.6552	0.2844	0.8317		1.141	0.9455	1.0068	0.8842	1.1345	1.2751	0.9938	0.939		100	100	100	100	100	100
	1449			erythronate*	LC/MS polar	42420		HMDB0000613	2781043					1.15249	1.14	1.16	0.97	0.95		0.6805	0.7672	0.1051	0.3931	0.9667	0.978	0.2597	0.7909	0.2315	0.6358	0.7337	0.7561	0.8037	0.9922		0.943	1.0347	0.9662	1.1032	0.9951	0.9197	1.0704	1.0868		100	100	100	100	100	100
	1451			N-acetylglucosamine/N-acetylgalactosamine	LC/MS pos early	46539	C01074	HMDB0000212 HMDB0000215	84265;439174					0.884156	0.93	0.84	0.92	1.01		0.729	0.7802	0.257	0.5004	0.4357	0.9683	0.8082	0.9333	0.1548	0.5888	0.3994	0.6317	0.7698	0.9875		1.0471	1.0021	1.0404	0.9637	0.9709	1.0538	0.8879	0.9258		93	93	88	100	95	100
	1457	Energy	TCA Cycle	citrate	LC/MS neg	1564	C00158	HMDB0000094	311					1.07931	1.07	1.09	0.81	0.79		0.0367	0.3019	0.4333	0.5929	0.9647	0.978	0.5778	0.9083	0.5782	0.7552	0.1048	0.507	0.1614	0.7608		0.9785	1.1317	1.0943	1.1691	0.9029	0.8628	0.9431	1.0561		100	100	100	100	100	100
	1459			aconitate [cis or trans]	LC/MS neg	46173	C02341 C004174	HMDB0000958 HMDB000072	643757;444212					1.15096	1.24	1.06	0.88	1.02		0.5077	0.7177	0.1872	0.4609	0.2875	0.9683	0.1131	0.7227	0.8428	0.8351	0.1984	0.5495	0.7841	0.9875		0.9645	1.0681	0.9531	1.1832	1.0065	0.9758	1.0371	1.1101		100	100	100	100	100	100
	1461			isocitrate	LC/MS pos early	12110	C00451	HMDB0001874	5318532					1.01339	1.11	0.93	0.89	1.06		0.675	0.7671	0.9338	0.7446	0.446	0.9683	0.6475	0.9164	0.5257	0.7385	0.3769	0.6317	0.8166	0.9933		1.016	1.0376	0.9857	1.0895	1.008	1.0463	0.9697	1.0296		100	100	100	100	100	100
	1463			alpha-ketoglutarate	LC/MS polar	528	C00026	HMDB0000208	51					1.20641	1.11	1.28	1.46	1.26		0.036	0.3019	0.1313	0.4239	0.7308	0.9752	0.426	0.8612	0.1648	0.5888	0.0662	0.4717	0.2252	0.7933		0.9263	0.8643	0.8196	0.909	1.1795	1.0331	1.326	1.1175		100	100	100	100	100	100
	1465			succinylcarnitine (C4-DC)	LC/MS pos early	37058		HMDB0061717	71464481					1.15665	1.14	1.17	0.99	0.97		0.8319	0.8098	0.2268	0.4828	0.9839	0.9807	0.4221	0.8601	0.3544	0.6963	0.8854	0.7938	0.876	0.9953		0.9352	1.0202	0.9516	1.0888	0.9967	0.9188	1.0745	1.0817		93	100	100	100	95	83
	1466			succinate	LC/MS polar	1437	C00042	HMDB0000254	1110					0.877811	0.95	0.81	0.89	1.04		0.4709	0.7014	0.1048	0.3931	0.3837	0.9683	0.6011	0.9145	0.0646	0.4651	0.2354	0.5865	0.9186	1		1.1384	1.0877	1.1184	1.057	1.05	1.1585	0.9416	0.9993		100	100	100	100	100	100
	1467			fumarate	LC/MS polar	1643	C00122	HMDB0000134	444972					1.19894	1.37	1.07	1.07	1.37		0.2061	0.5235	0.2675	0.5032	0.2854	0.9683	0.1472	0.7398	0.975	0.8575	0.879	0.7933	0.1207	0.7608		1.0003	0.9998	0.8427	1.157	1.1998	1.158	1.2415	1.1993		100	100	100	100	100	100
	1469			malate	LC/MS neg	1303	C00497 C00149 C00711	HMDB0000744 HMDB0031518 HMDB0000156	525					1.24725	1.17	1.31	1.32	1.19		0.2679	0.5835	0.2461	0.4943	0.8718	0.9757	0.4991	0.8761	0.3209	0.6801	0.3405	0.6249	0.522	0.917		0.9727	0.9671	0.89	1.0441	1.2188	1.0553	1.3822	1.2132		100	100	100	100	100	100
	1478			2-methylcitrate/homocitrate	LC/MS neg	52282	C01251	HMDB0003518 HMDB0000379	515;439459					1.1313	1.22	1.05	1.02	1.19		0.3699	0.6565	0.2747	0.5063	0.404	0.9683	0.1987	0.785	0.8433	0.8351	0.9622	0.8101	0.2478	0.8207		0.936	0.9518	0.8563	1.0472	1.0432	1.0157	1.0707	1.0589		93	93	88	100	95	100
	1480			citraconate/glutaconate	LC/MS polar	47076	C02226 C02214	HMDB0000620 HMDB0000634	643798;5280498					0.758309	0.84	0.7	1.17	1.41		0.4772	0.7064	0.6943	0.678	0.9347	0.978	0.75	0.9224	0.8153	0.8306	0.5518	0.6928	0.6721	0.9653		1.5946	1.2197	1.3255	1.1138	1.5842	1.8637	1.3046	1.2092		100	100	100	100	100	100
	1486		Oxidative Phosphorylation	phosphate	LC/MS pos early	42109	C00009	HMDB0001429	1061					0.944976	0.9	1	1	0.9		0.7738	0.7923	0.6308	0.6604	0.7775	0.9752	0.6089	0.9145	0.8816	0.8441	0.9971	0.8124	0.7023	0.9752		1.0559	1.0535	1.11	0.9969	1.0002	1.0018	0.9987	0.9978		100	100	100	100	100	100
	1490	Lipid	Fatty Acid Synthesis	malonate	LC/MS polar	15872	C00383	HMDB0000691	867					0.896507	0.9	0.9	0.89	0.89		0.1802	0.5026	0.1468	0.4379	0.9128	0.978	0.3625	0.846	0.2396	0.6431	0.2751	0.6062	0.4042	0.878		1.0909	1.0966	1.1565	1.0368	0.9723	1.0254	0.9191	0.978		100	100	100	100	100	100
	1505		Short Chain Fatty Acid	butyrate/isobutyrate (4:0)	LC/MS neg	40605	C00246	HMDB0000039	264					0.811893	0.82	0.8	1.06	1.08		0.5109	0.719	0.0522	0.3184	0.8523	0.9757	0.2286	0.785	0.1081	0.5212	0.7228	0.7543	0.5714	0.9343		1.1738	1.0258	1.1276	0.9241	1.1009	1.22	0.9819	0.953		100	100	100	100	100	100
	1506			valerate (5:0)	LC/MS neg	33443	C00803	HMDB0000892	7991					0.701652	0.82	0.61	0.95	1.28		0.6409	0.7569	0.1112	0.4088	0.3186	0.9683	0.6775	0.9186	0.0555	0.4501	0.6868	0.7431	0.327	0.8512		1.0652	0.8515	0.9346	0.7684	0.9612	1.1959	0.7265	0.7474		100	93	100	83	90	100
	1511		Medium Chain Fatty Acid	caproate (6:0)	LC/MS neg	32489	C01585	HMDB0000535	8892					0.828071	0.92	0.76	1.13	1.37		0.0476	0.3303	0.0896	0.3753	0.2472	0.9683	0.7033	0.9195	0.0355	0.4107	0.5126	0.6771	0.0374	0.7064		1.0673	0.867	0.9022	0.8318	1.0841	1.2324	0.9358	0.8838		100	100	100	100	100	100
	1512			heptanoate (7:0)	LC/MS neg	1644	C17714	HMDB0000666	8094					1.00697	1.08	0.95	1.15	1.3		0.0999	0.4043	0.9868	0.7506	0.4809	0.9683	0.6277	0.9145	0.605	0.7636	0.4667	0.6607	0.1161	0.7608		1.0755	0.9727	0.9361	1.0093	1.1858	1.215	1.1566	1.083		100	100	100	100	100	100
	1513			caprylate (8:0)	LC/MS neg	32492	C06423	HMDB0000482	379					0.34077	0.21	0.87	0.96	0.24		0.1391	0.4697	0.0509	0.3184	0.2331	0.9683	0.0371	0.6452	0.5457	0.7428	0.8223	0.7817	0.0762	0.7604		3.272	3.2151	5.2932	1.1369	1.172	1.2508	1.0932	1.115		100	100	100	100	100	100
	1514			pelargonate (9:0)	LC/MS neg	12035	C01601	HMDB0000847	8158					0.778963	0.71	0.83	1.47	1.26		0.0449	0.3275	0.1674	0.455	0.8879	0.9758	0.3046	0.8104	0.3476	0.6963	0.1041	0.507	0.2008	0.7733		1.2473	0.9467	1.1057	0.7877	1.2721	1.3888	1.1554	0.9716		100	100	100	100	100	100
	1516			caprate (10:0)	LC/MS neg	1642	C01571	HMDB0000511	2969					0.395209	0.31	0.61	0.8	0.4		0.0923	0.3878	0.0183	0.24	0.5244	0.9683	0.0437	0.6452	0.1759	0.589	0.4185	0.6396	0.1204	0.7608		2.4921	2.3217	3.5481	1.0952	1.1553	1.436	0.8746	0.9849		100	100	100	100	100	100
	1517			cis-4-decenoate (10:1n6)*	LC/MS neg	62873		HMDB0004980	5282726					0.85617	0.69	1.07	1.17	0.76		0.9663	0.8346	0.4579	0.5981	0.227	0.9683	0.1928	0.785	0.7207	0.801	0.379	0.6317	0.3988	0.878		1.0422	1.0038	1.185	0.8225	0.9307	0.8994	0.962	0.8923		93	86	88	83	100	100
	1520			(2 or 3)-decenoate (10:1n7 or n8)	LC/MS neg	63436								1.15009	1.13	1.18	0.77	0.73		0.6532	0.7632	0.7851	0.6989	0.6253	0.9683	0.8846	0.9398	0.5686	0.7519	0.9765	0.8114	0.5299	0.921		0.8928	1.0963	1.0307	1.1619	0.8233	0.755	0.8917	1.0268		79	79	75	83	86	83
	1521			undecanoate (11:0)	LC/MS neg	12067	C17715	HMDB0000947	8180					0.854132	0.8	0.89	1.4	1.26		0.0451	0.3275	0.3435	0.551	0.9679	0.978	0.5062	0.8824	0.4946	0.7286	0.1205	0.507	0.1794	0.7608		1.1956	0.953	1.0567	0.8494	1.2637	1.3344	1.1929	1.0212		100	100	100	100	100	100
	1522			10-undecenoate (11:1n1)	LC/MS neg	32497	C13910	HMDB0033724	14891					1.00629	0.74	1.35	1.4	0.77		0.7687	0.7914	0.7906	0.6989	0.1483	0.9683	0.4214	0.8601	0.1989	0.6021	0.3807	0.6317	0.2418	0.8167		1.0816	1.0646	1.2224	0.9068	1.1053	0.9407	1.2699	1.0884		100	100	100	100	100	100
	1524			laurate (12:0)	LC/MS neg	1645	C02679	HMDB0000638	3893					0.816041	1.17	0.54	0.58	1.27		0.8421	0.8098	0.2104	0.4753	0.2041	0.9683	0.9902	0.9453	0.0625	0.4636	0.2698	0.6019	0.4675	0.8977		1.4351	1.3727	1.2636	1.4817	1.2336	1.6066	0.8605	1.1711		100	100	100	100	100	100
	1526			5-dodecenoate (12:1n7)	LC/MS neg	33968		HMDB0000529	5312378					0.634055	0.72	0.53	0.66	0.89		0.9572	0.8346	0.1503	0.4433	0.5941	0.9683	0.5344	0.8958	0.1411	0.5717	0.6599	0.7405	0.7475	0.9875		1.8194	1.6586	1.9255	1.3918	1.3143	1.7132	0.9153	1.1536		100	100	100	100	100	100
	1529		Long Chain Saturated Fatty Acid	myristate (14:0)	LC/MS neg	1365	C06424	HMDB0000806	11005					0.801873	0.82	0.78	0.96	1.01		0.9763	0.8346	0.4004	0.5779	0.7973	0.9752	0.6933	0.9195	0.4108	0.7092	0.8647	0.791	0.8476	0.9953		1.2492	1.132	1.2438	1.0202	1.1189	1.2546	0.9833	1.0017		100	100	100	100	100	100
	1531			pentadecanoate (15:0)	LC/MS neg	1361	C16537	HMDB0000826	13849					0.802431	0.74	0.87	1.08	0.92		0.9341	0.8342	0.2351	0.4866	0.7006	0.9717	0.2918	0.7952	0.5418	0.7421	0.726	0.7545	0.8394	0.9953		1.1024	1.0008	1.1491	0.8525	0.9863	1.0558	0.9168	0.8846		100	100	100	100	100	100
	1532			palmitate (16:0)	LC/MS neg	1336	C00249	HMDB0000220	985					0.914735	0.9	0.93	1.02	0.99		0.8065	0.8036	0.4011	0.5779	0.8887	0.9758	0.5105	0.8824	0.598	0.7609	0.7729	0.7703	0.9438	1		1.018	0.973	1.0246	0.9213	0.9762	1.0113	0.9412	0.9312		100	100	100	100	100	100
	1534			margarate (17:0)	LC/MS neg	1121		HMDB0002259	10465					0.888137	0.83	0.95	1.08	0.95		0.8699	0.8228	0.4282	0.5906	0.6956	0.9717	0.4279	0.8612	0.7617	0.8181	0.6773	0.7431	0.8785	0.9953		1.0781	1.0127	1.1054	0.92	1.0229	1.0509	0.9949	0.9575		100	100	100	100	100	100
	1536			stearate (18:0)	LC/MS neg	1358	C01530	HMDB0000827	5281					0.933928	0.93	0.93	0.99	0.99		0.9285	0.8319	0.4643	0.6029	0.9289	0.978	0.6654	0.9186	0.5377	0.7407	0.8933	0.7951	0.9998	1		1.0095	0.9828	1.0163	0.9492	0.9695	1.0026	0.9363	0.9428		100	100	100	100	100	100
	1538			nonadecanoate (19:0)	LC/MS neg	1356	C16535	HMDB0000772	12591					0.900268	1.02	0.8	0.91	1.17		0.7487	0.7835	0.5187	0.6196	0.3846	0.9683	0.8789	0.9398	0.2586	0.6517	0.6781	0.7431	0.425	0.8848		1.1942	1.1114	1.0999	1.1229	1.1579	1.2884	1.0274	1.0751		100	100	100	100	100	100
	1539			arachidate (20:0)	LC/MS neg	1118	C06425	HMDB0002212	10467					0.759567	0.89	0.68	1.16	1.52		0.0622	0.3419	0.0781	0.3522	0.198	0.9683	0.7363	0.9224	0.0251	0.3632	0.6458	0.7354	0.037	0.7064		1.3588	1.0168	1.0787	0.955	1.3742	1.639	1.1093	1.0321		100	100	100	100	100	100
	1548		Long Chain Monounsaturated Fatty Acid	myristoleate (14:1n5)	LC/MS neg	32418	C08322	HMDB0002000	5281119					0.710985	0.71	0.71	0.74	0.74		0.7457	0.7832	0.3947	0.5738	0.9926	0.9809	0.5626	0.9082	0.5267	0.7385	0.8131	0.7794	0.8228	0.9947		1.757	1.7294	2.0247	1.4341	1.2768	1.4893	1.0644	1.2492		100	100	100	100	100	100
	1551			palmitoleate (16:1n7)	LC/MS neg	33447	C08362	HMDB0003229	445638					0.732368	0.86	0.61	0.74	1.03		0.9438	0.8342	0.2542	0.499	0.8874	0.9758	0.4993	0.8761	0.3355	0.6951	0.9575	0.8101	0.8869	0.9973		1.5611	1.4261	1.5369	1.3152	1.2783	1.5852	0.9714	1.1433		100	100	100	100	100	100
	1553			10-heptadecenoate (17:1n7)	LC/MS neg	33971		HMDB0060038	5312435					0.856462	0.79	0.93	1.01	0.86		0.8803	0.8233	0.4278	0.5906	0.6805	0.9717	0.4197	0.8601	0.7731	0.8226	0.6733	0.7422	0.8606	0.9953		1.1955	1.153	1.2874	1.0186	1.0664	1.1036	1.0293	1.0239		100	100	100	100	100	100
	1555			oleate/vaccenate (18:1)	LC/MS neg	52285	C01712 C08367 C00712 C21944	HMDB0000207 HMDB0000573 HMDB0003231 HMDB0240219	637517;445639;5281127;5282761					0.832692	0.81	0.86	1.02	0.95		0.9975	0.838	0.2687	0.5032	0.7857	0.9752	0.3547	0.8414	0.5275	0.7385	0.8365	0.7865	0.8568	0.9953		1.1171	1.033	1.1435	0.9224	1.0143	1.0907	0.938	0.9302		100	100	100	100	100	100
	1562			10-nonadecenoate (19:1n9)	LC/MS neg	33972		HMDB0013622	5312513					0.780645	0.7	0.87	1.07	0.87		0.9506	0.8342	0.34	0.5497	0.5786	0.9683	0.3125	0.8174	0.7617	0.8181	0.6432	0.7331	0.7402	0.9875		1.364	1.2442	1.4616	1.0268	1.1846	1.2664	1.1027	1.0648		100	100	100	100	100	100
	1565			eicosenoate (20:1)	LC/MS neg	33587	C16526	HMDB0002231 HMDB0062436	5282769;5282768;94159					0.626162	0.66	0.6	1.21	1.33		0.3621	0.6551	0.0682	0.3448	0.9016	0.9776	0.2454	0.7881	0.141	0.5717	0.5527	0.6929	0.4866	0.8993		1.5381	1.0951	1.3176	0.8726	1.4061	1.7585	1.0536	0.9631		100	100	100	100	100	100
	1569			erucate (22:1n9)	LC/MS neg	1552	C08316	HMDB0002068	8216;5281116					0.47313	0.83	0.34	1.14	2.76		0.0228	0.2868	0.0382	0.2939	0.0513	0.9683	0.927	0.9453	0.0037	0.2381	0.7839	0.7729	0.0057	0.5766		2.0227	0.9857	1.0759	0.8956	1.994	2.9695	1.0185	0.957		100	100	100	100	100	100
	1571			nervonate (24:1n9)*	LC/MS neg	52674	C08323	HMDB0002368	5281120					0.937147	0.61	1.17	2.79	1.45		0.0036	0.1662	0.2858	0.5113	0.287	0.9683	0.1556	0.7471	0.9984	0.8588	0.0034	0.2261	0.1757	0.7608		0.8846	0.5806	0.7234	0.4379	1.133	1.0458	1.2201	0.829		93	64	88	33	95	100
	1572		Long Chain Polyunsaturated Fatty Acid (n3 and n6)	tetradecadienoate (14:2)*	LC/MS neg	62850		HMDB0000560	5312409					0.974107	0.86	1.14	0.87	0.66		0.7177	0.7761	0.9582	0.7455	0.416	0.9683	0.5605	0.9082	0.567	0.7508	0.7327	0.7561	0.4311	0.8882		1.0698	1.2026	1.2898	1.1154	0.9093	0.8498	0.9688	1.0421		100	100	100	100	100	100
	1579			stearidonate (18:4n3)	LC/MS neg	33969	C16300	HMDB0006547	5312508					1.52765	2.32	0.92	0.52	1.3		0.812	0.805	0.444	0.5945	0.2434	0.9683	0.1972	0.785	0.7583	0.8171	0.292	0.6091	0.5289	0.921		1.0001	1.44	0.8686	2.0114	1.0879	1.1316	1.0442	1.5278		100	100	100	100	100	100
	1582			eicosapentaenoate (EPA; 20:5n3)	LC/MS neg	18467	C06428	HMDB0001999	446284					1.05691	1.43	0.8	0.81	1.45		0.6408	0.7569	0.8769	0.7311	0.1926	0.9683	0.3259	0.8261	0.3846	0.6978	0.5233	0.6824	0.2356	0.8037		1.1035	1.0948	0.9016	1.288	1.175	1.3055	1.0446	1.1663		100	100	100	100	100	100
	1583			heneicosapentaenoate (21:5n3)	LC/MS neg	57658			11998573					0.626508	1.35	0.44	1.29	3.95		0.0152	0.2737	0.1647	0.455	0.0579	0.9683	0.7167	0.9215	0.0162	0.3202	0.6552	0.7405	0.0047	0.5766		0.6217	0.2953	0.2512	0.3394	0.7158	0.9922	0.4395	0.3895		43	29	25	33	38	67
	1584			docosapentaenoate (n3 DPA; 22:5n3)	LC/MS neg	32504	C16513	HMDB0001976 HMDB0006528	6441454					0.758159	0.93	0.62	0.8	1.21		0.8902	0.8255	0.1461	0.4379	0.444	0.9683	0.6346	0.9145	0.0992	0.5115	0.6366	0.7324	0.544	0.9291		1.3881	1.2121	1.2552	1.1689	1.2284	1.521	0.9359	1.0524		100	100	100	100	100	100
	1585			docosahexaenoate (DHA; 22:6n3)	LC/MS neg	44675	C06429	HMDB0002183	445580					0.768523	0.96	0.6	0.73	1.16		0.5975	0.743	0.2411	0.4902	0.3311	0.9683	0.8901	0.9404	0.1118	0.5212	0.2628	0.5953	0.7628	0.9875		1.3375	1.2144	1.2407	1.1882	1.151	1.4343	0.8677	1.0279		100	100	100	100	100	100
	1586			docosatrienoate (22:3n3)	LC/MS neg	32417	C16534	HMDB0002823	5312556					0.816174	0.63	0.98	1.77	1.14		0.3435	0.6433	0.316	0.532	0.4132	0.9683	0.2243	0.785	0.8878	0.8444	0.1888	0.5485	0.9297	1		1.0548	0.8026	0.9838	0.6215	1.1131	1.1259	1.1004	0.8609		86	64	75	50	81	100
	1587			nisinate (24:6n3)	LC/MS neg	57810		HMDB0013025	11792612					1.16468	1.47	0.88	0.62	1.04		0.5492	0.7343	0.3659	0.5615	0.5756	0.9683	0.3274	0.827	0.7936	0.8244	0.3864	0.6317	0.9788	1		0.8659	1.0458	0.8484	1.2432	0.8286	0.8834	0.7738	1.0085		43	57	50	67	57	33
	1588			hexadecadienoate (16:2n6)	LC/MS neg	57652		HMDB0000477	13932172					0.899992	1.09	0.73	0.76	1.14		0.841	0.8098	0.351	0.5566	0.6079	0.9683	0.7756	0.9317	0.2802	0.6561	0.8142	0.7794	0.6322	0.955		1.2719	1.2451	1.1913	1.2989	1.1716	1.3526	0.9905	1.1447		100	100	100	100	100	100
	1589			linoleate (18:2n6)	LC/MS neg	1105	C01595	HMDB0000673 HMDB0006270	5280450					0.914081	0.96	0.87	0.88	0.97		0.7391	0.7811	0.3523	0.5566	0.8823	0.9757	0.5976	0.9145	0.4184	0.7092	0.7183	0.7519	0.9011	1		1.0347	1.0297	1.0509	1.0085	0.9508	1.0184	0.8831	0.9458		100	100	100	100	100	100
	1591			linolenate [alpha or gamma; (18:3n3 or 6)]	LC/MS neg	34035	C06426 C06427	HMDB0001388 HMDB0003073	5280933;5280934					1.72939	2.68	0.75	0.27	0.97		0.1581	0.4918	0.9796	0.7485	0.3729	0.9683	0.5599	0.9082	0.4907	0.7286	0.0878	0.507	0.7186	0.983		1.1958	2.2327	1.2144	3.2509	1.0311	1.1772	0.885	2.068		100	100	100	100	100	100
	1592			dihomo-linoleate (20:2n6)	LC/MS neg	17805	C16525	HMDB0005060	6439848					0.759001	0.75	0.77	1.08	1.05		0.7135	0.7761	0.1488	0.4401	0.6996	0.9717	0.2191	0.785	0.4194	0.7092	0.5728	0.7071	0.99	1		1.3332	1.1363	1.3019	0.9706	1.2088	1.3645	1.0531	1.0119		100	100	100	100	100	100
	1594			dihomo-linolenate (20:3n3 or n6)	LC/MS neg	35718	C03242	HMDB0002925	5280581					0.743522	0.73	0.75	0.95	0.93		0.6259	0.7521	0.053	0.3184	0.8614	0.9757	0.2273	0.785	0.1109	0.5212	0.6197	0.7284	0.8333	0.9953		1.2812	1.1545	1.3309	0.9782	1.0792	1.2314	0.927	0.9526		100	100	100	100	100	100
	1595			arachidonate (20:4n6)	LC/MS neg	1110	C00219	HMDB0001043	444899					0.879505	0.76	1.05	0.94	0.68		0.2644	0.581	0.4938	0.6111	0.3511	0.9683	0.28	0.7934	0.85	0.8387	0.8877	0.7938	0.1722	0.7608		1.132	1.1894	1.35	1.0287	0.9382	0.9139	0.9625	0.9956		100	100	100	100	100	100
	1596			docosatrienoate (22:3n6)*	LC/MS neg	57467			75955220					0.758278	0.83	0.69	0.91	1.09		0.8114	0.805	0.3675	0.5615	0.9193	0.978	0.5896	0.9132	0.4515	0.7196	0.9179	0.8022	0.8196	0.9939		0.9151	0.8008	0.8739	0.7276	0.8082	0.9563	0.6602	0.6939		71	50	63	33	57	83
	1597			adrenate (22:4n6)	LC/MS neg	32980	C16527	HMDB0002226	5497181;5282844					0.731539	0.55	0.97	1.34	0.76		0.6541	0.7632	0.2151	0.4796	0.1552	0.9683	0.0774	0.666	0.8868	0.8441	0.1621	0.5365	0.5054	0.9077		1.3596	1.1994	1.5487	0.8501	1.1548	1.1706	1.139	0.9946		100	100	100	100	100	100
	1598			docosapentaenoate (n6 DPA; 22:5n6)	LC/MS neg	37478	C16513	HMDB0001976	6441454					0.7149	0.52	1.23	0.92	0.39		0.026	0.2868	0.1814	0.4558	0.0121	0.8182	0.011	0.6452	0.3374	0.6956	0.8073	0.7794	0.0021	0.5551		1.4409	1.5756	2.0769	1.0742	0.8955	0.8049	0.9861	1.0301		86	86	100	67	86	67
	1599			docosadienoate (22:2n6)	LC/MS neg	32415	C16533	HMDB0061714	5282807					0.760245	0.79	0.73	1.05	1.14		0.5791	0.743	0.1736	0.4558	0.9998	0.983	0.3575	0.8451	0.3043	0.6745	0.6771	0.7431	0.7093	0.9785		1.2909	1.0821	1.206	0.9582	1.1902	1.3759	1.0045	0.9814		100	100	100	100	100	100
	1664		Fatty Acid, Branched	(14 or 15)-methylpalmitate (a17:0 or i17:0)	LC/MS neg	38768	C16995	HMDB0061859	8181;17903417					0.890163	0.9	0.88	0.93	0.96		0.879	0.8233	0.5179	0.6196	0.8301	0.9752	0.5635	0.9082	0.745	0.8096	0.7833	0.7729	0.9666	1		1.1863	1.153	1.2122	1.0937	1.0893	1.1603	1.0183	1.056		100	100	100	100	100	100
	1665			cis-3,4-methyleneheptanoate	LC/MS neg	64390								1.08758	0.88	1.46	0.95	0.57		0.0433	0.3247	0.2867	0.5113	0.1624	0.9683	0.8173	0.9333	0.0686	0.4655	0.6161	0.7278	0.024	0.6722		1.1007	1.3171	1.4043	1.2298	0.9807	0.7971	1.1643	1.1971		100	100	100	100	100	100
	1670			(16 or 17)-methylstearate (a19:0 or i19:0)	LC/MS neg	38296		HMDB0037397	3083779					0.853981	0.95	0.77	0.95	1.17		0.6259	0.7521	0.4688	0.6054	0.8534	0.9757	0.7162	0.9215	0.4954	0.7286	0.82	0.7817	0.6521	0.9574		1.2471	1.1204	1.1484	1.0925	1.1916	1.3457	1.0375	1.065		100	100	100	100	100	100
	1681		Fatty Acid, Dicarboxylate	glutarate (C5-DC)	LC/MS polar	396	C00489	HMDB0000661	743;4418048					0.895154	0.89	0.9	1.48	1.48		0.0242	0.2868	0.4954	0.6111	0.8734	0.9757	0.725	0.9215	0.5282	0.7385	0.1076	0.507	0.0996	0.7608		1.0854	0.8298	0.8767	0.783	1.2271	1.294	1.1603	0.9716		100	100	100	100	100	100
	1685			2-hydroxyglutarate	LC/MS pos early	52294	C02630	HMDB0059655	43					0.624212	0.81	0.53	1.28	1.94		0.0085	0.2311	0.0165	0.237	0.2943	0.9683	0.3322	0.8316	0.0111	0.2728	0.2012	0.5522	0.0142	0.6553		1.3968	0.8576	0.9498	0.7655	1.4111	1.8439	0.9784	0.8719		100	100	100	100	100	100
	1687			adipate (C6-DC)	LC/MS polar	21134	C06104	HMDB0000448	196					0.868452	0.9	0.84	1.24	1.34		0.1618	0.4944	0.3384	0.5492	0.9909	0.9807	0.524	0.8893	0.4662	0.7202	0.2945	0.6091	0.34	0.8608		1.1015	0.8977	0.943	0.8524	1.1604	1.26	1.0608	0.9566		100	100	100	100	100	100
	1689			2-hydroxyadipate	LC/MS polar	31934	C02360	HMDB0000321	193530					0.870894	0.95	0.82	1.26	1.46		0.0535	0.333	0.4881	0.6105	0.4229	0.9683	0.9414	0.9453	0.2649	0.655	0.3771	0.6317	0.068	0.7604		1.1417	0.9047	0.9288	0.8805	1.2314	1.3546	1.1082	0.9943		100	100	100	100	100	100
	1690			3-hydroxyadipate	LC/MS polar	62069		HMDB0000345	151913					0.646093	0.65	0.64	1.3	1.32		0.1246	0.4453	0.0489	0.3184	0.6538	0.9683	0.2923	0.7952	0.0699	0.4655	0.405	0.6317	0.1828	0.7608		1.3334	0.9492	1.1491	0.7494	1.2457	1.5178	0.9736	0.8615		100	100	100	100	100	100
	1693			maleate	LC/MS polar	20676	C01384	HMDB0000176	444266					0.853803	0.85	0.86	1.11	1.1		0.5309	0.7265	0.7306	0.6911	0.6937	0.9717	0.6208	0.9145	0.9703	0.8569	0.4451	0.6493	0.8751	0.9953		1.5315	1.3502	1.459	1.2414	1.4889	1.6039	1.3739	1.3076		100	100	100	100	100	100
	1695			pimelate (C7-DC)	LC/MS polar	15704	C02656	HMDB0000857	385					0.928844	0.96	0.91	1.48	1.57		0.0486	0.3303	0.5805	0.6338	0.9865	0.9807	0.7021	0.9195	0.6875	0.787	0.1307	0.507	0.1819	0.7608		1.0751	0.8206	0.8362	0.805	1.2532	1.314	1.1923	0.9986		100	100	100	100	100	100
	1696			heptenedioate (C7:1-DC)*	LC/MS polar	61866								0.961808	0.82	1.14	1.14	0.82		0.9143	0.8282	0.9002	0.7394	0.4363	0.9683	0.5438	0.8975	0.6229	0.7665	0.6136	0.7273	0.5517	0.9292		1.0133	1.0131	1.1154	0.9108	0.9747	0.9111	1.0383	0.9746		100	100	100	100	100	100
	1698			suberate (C8-DC)	LC/MS polar	15730	C08278	HMDB0000893	10457					0.831299	0.8	0.86	1.42	1.31		0.1399	0.4703	0.2832	0.5113	0.7184	0.9742	0.3363	0.8341	0.5889	0.7593	0.1687	0.5413	0.4459	0.8925		1.0978	0.8529	0.9501	0.7558	1.1575	1.2455	1.0695	0.9126		100	100	100	100	100	100
	1701			azelate (C9-DC)	LC/MS neg	18362	C08261	HMDB0000784	2266					0.888004	0.83	0.93	1.45	1.3		0.0885	0.3862	0.3689	0.5615	0.6964	0.9717	0.3879	0.8592	0.7003	0.7923	0.1166	0.507	0.367	0.8621		1.1295	0.9003	0.9818	0.8188	1.2322	1.2772	1.1873	1.003		100	100	100	100	100	100
	1703			sebacate (C10-DC)	LC/MS neg	32398	C08277	HMDB0000792	5192					0.805597	0.68	0.92	1.55	1.14		0.109	0.4115	0.1754	0.4558	0.4656	0.9683	0.1639	0.7688	0.6304	0.7705	0.083	0.4997	0.5454	0.9291		1.215	0.9509	1.1345	0.7673	1.243	1.2956	1.1904	0.9788		100	100	100	100	100	100
	1704			decadienedioic acid (C10:2-DC)**	LC/MS polar	63685			17789717					0.908683	0.81	1.07	0.83	0.62		0.7597	0.7899	0.7341	0.6919	0.4806	0.9683	0.4837	0.8715	0.7825	0.8227	0.7631	0.7662	0.4979	0.9029		1.5616	1.7396	1.9264	1.5528	1.241	1.1969	1.2852	1.419		100	100	100	100	100	100
	1705			undecanedioate (C11-DC)	LC/MS neg	42395		HMDB0000888	15816					0.968031	0.84	1.07	1.57	1.24		0.0704	0.3528	0.5507	0.6257	0.632	0.9683	0.4714	0.8715	0.9291	0.8506	0.0868	0.507	0.3582	0.8621		0.9822	0.809	0.8785	0.7395	1.124	1.0859	1.162	0.9508		100	100	100	100	100	100
	1708			dodecanedioate (C12-DC)	LC/MS neg	32388	C02678	HMDB0000623	12736					0.861418	0.92	0.82	1.35	1.51		0.043	0.3242	0.6482	0.6667	0.2799	0.9683	0.6712	0.9186	0.2508	0.65	0.4543	0.6563	0.0392	0.7064		1.2765	0.977	1.0181	0.9359	1.3991	1.5348	1.2633	1.0996		100	100	100	100	100	100
	1709			3-hydroxydodecanedioate*	LC/MS neg	62915		HMDB0000413	16663321					0.820528	0.62	1.11	1.23	0.69		0.6233	0.7521	0.8113	0.7055	0.9864	0.9807	0.8818	0.9398	0.8479	0.8387	0.7028	0.7461	0.7501	0.9875		0.9879	0.9487	1.169	0.7285	0.8498	0.8068	0.8928	0.8106		50	57	50	67	52	50
	1710			dodecenedioate (C12:1-DC)*	LC/MS neg	61864		HMDB0000933	5283028					1.06188	1.12	0.99	0.68	0.77		0.5562	0.7422	0.7686	0.6975	0.8839	0.9757	0.7678	0.9271	0.9114	0.8491	0.5818	0.7134	0.7659	0.9875		1.2895	1.541	1.4556	1.6265	1.1178	1.1234	1.1121	1.3693		100	100	100	100	100	100
	1711			dodecadienoate (12:2)*	LC/MS neg	62276			25480					1.07591	0.93	1.27	1.04	0.76		0.7754	0.7923	0.8567	0.7235	0.3487	0.9683	0.6094	0.9145	0.4018	0.7058	0.6222	0.7295	0.4121	0.878		0.9986	1.095	1.1346	1.0553	0.978	0.8625	1.0935	1.0744		100	100	100	100	100	100
	1712			tridecenedioate (C13:1-DC)*	LC/MS neg	62919								0.747981	0.51	1.16	1.3	0.58		0.8284	0.8097	0.8918	0.7359	0.2684	0.9683	0.403	0.8592	0.4635	0.7202	0.5008	0.6731	0.3737	0.8689		1.3376	1.2834	1.6974	0.8694	1.0547	0.9777	1.1316	1.0005		100	100	100	100	100	100
	1713			tetradecanedioate (C14-DC)	LC/MS neg	35669		HMDB0000872	13185					0.648012	0.7	0.6	1	1.16		0.2933	0.609	0.2078	0.475	0.613	0.9683	0.6066	0.9145	0.1874	0.598	0.6784	0.7431	0.2974	0.8396		1.5867	1.2473	1.4685	1.0261	1.3676	1.705	1.0302	1.0282		100	100	100	100	100	100
	1715			branched chain 14:0 dicarboxylic acid**	LC/MS neg	63191								1.83854	2.66	1.43	1.09	2.02		0.9724	0.8346	0.3169	0.532	0.2555	0.9683	0.1545	0.7469	0.9164	0.8491	0.3777	0.6317	0.4567	0.8977		0.9352	1.1334	0.6194	1.6473	1.5213	1.2511	1.7915	1.7194		93	93	88	100	76	100
	1716			tetradecadienedioate (C14:2-DC)*	LC/MS neg	62918			86018718					0.751031	0.82	0.66	0.69	0.85		0.75	0.7835	0.397	0.5757	0.7814	0.9752	0.4506	0.8701	0.6671	0.7834	0.9754	0.811	0.6894	0.9699		2.0858	2.0554	2.253	1.8577	1.5969	1.9186	1.2752	1.5665		100	93	100	83	100	100
	1717			hexadecanedioate (C16-DC)	LC/MS neg	35678	C19615	HMDB0000672	10459					0.664295	0.7	0.63	1.05	1.17		0.3508	0.6491	0.1252	0.4204	0.6504	0.9683	0.4589	0.8715	0.1374	0.5648	0.7159	0.7507	0.3532	0.8621		1.4054	1.1041	1.2952	0.9129	1.2349	1.5155	0.9543	0.9336		100	100	100	100	100	100
	1718			hexadecenedioate (C16:1-DC)*	LC/MS neg	61862								0.752939	0.86	0.67	1.04	1.34		0.0643	0.3446	0.1518	0.4434	0.4507	0.9683	0.6393	0.9145	0.104	0.5152	0.3931	0.6317	0.0817	0.7608		1.3867	1.105	1.1854	1.0246	1.3258	1.588	1.0635	1.0441		100	100	100	100	100	100
	1720			octadecanedioate (C18-DC)	LC/MS neg	36754		HMDB0000782	70095					0.68735	0.72	0.65	0.89	0.98		0.9735	0.8346	0.1628	0.455	0.5697	0.9683	0.5703	0.9083	0.1429	0.5736	0.6876	0.7431	0.6862	0.9697		1.5794	1.3723	1.594	1.1505	1.2928	1.5648	1.0207	1.0856		100	100	100	100	100	100
	1721			octadecenedioate (C18:1-DC)	LC/MS neg	61861			9543674					0.802686	0.9	0.71	0.82	1.03		0.8206	0.8082	0.2192	0.4808	0.3921	0.9683	0.7974	0.9331	0.1217	0.542	0.635	0.7324	0.4674	0.8977		1.3922	1.3	1.3698	1.2302	1.2097	1.4145	1.0049	1.1175		100	100	100	100	100	100
	1722			octadecadienedioate (C18:2-DC)*	LC/MS neg	61860								0.999708	1.1	0.89	0.74	0.92		0.9911	0.8367	0.6672	0.6683	0.8914	0.9772	0.8437	0.9333	0.671	0.7847	0.9118	0.8002	0.933	1		1.3684	1.4994	1.4273	1.5716	1.237	1.3096	1.1644	1.368		100	100	100	100	100	100
	1724			eicosanedioate (C20-DC)	LC/MS neg	39831			75502					1.2577	1.23	1.28	1.44	1.39		0.0689	0.3527	0.3263	0.539	0.9866	0.9807	0.5013	0.8762	0.4677	0.7202	0.1713	0.5413	0.2116	0.7865		1.0093	0.9421	0.8439	1.0403	1.3366	1.1748	1.4985	1.2694		100	100	100	100	100	100
	1725			eicosenedioate (C20:1-DC)*	LC/MS neg	62923								1.51663	1.22	1.7	2.27	1.64		0.0399	0.3131	0.3891	0.5708	0.4699	0.9683	0.9248	0.9453	0.2377	0.6415	0.0389	0.4204	0.3505	0.8621		1.1366	0.9585	0.8626	1.0543	1.9019	1.4106	2.3933	1.7238		93	93	88	100	100	100
	1726			docosadioate (C22-DC)	LC/MS neg	39837	C14240		7641					1.21655	1.14	1.28	1.35	1.19		0.0078	0.2196	0.0263	0.2579	0.5666	0.9683	0.2483	0.7881	0.0366	0.4164	0.0152	0.3361	0.1384	0.7608		0.8917	0.8694	0.8139	0.9248	1.1071	0.9694	1.2447	1.0848		100	100	100	100	100	100
	1727			3-carboxy-4-methyl-5-propyl-2-furanpropanoate (CMPF)	LC/MS neg	31787		HMDB0061112	123979					1.18541	2.17	0.92	1.58	3.73		0.0404	0.3142	0.5545	0.6281	0.3284	0.9683	0.2942	0.7961	0.7687	0.8206	0.3967	0.6317	0.0439	0.7238		1.6871	1.1312	0.7129	1.5495	2.5558	2.6614	2.4503	1.9999		100	100	100	100	100	100
	1728			hydroxy-CMPF*	LC/MS neg	62277								0.866323	1.79	0.53	0.81	2.74		0.2703	0.5855	0.7113	0.6838	0.1134	0.9683	0.4061	0.8592	0.1432	0.5736	0.7066	0.7481	0.0745	0.7604		1.7864	1.3342	0.9555	1.7129	1.9998	2.6173	1.3823	1.5476		100	100	100	100	100	100
	1729			3-carboxy-4-methyl-5-pentyl-2-furanpropionate (3-CMPFP)**	LC/MS neg	61871		HMDB0061643	194501					1.50801	1.92	1.19	0.8	1.28		0.6211	0.7521	0.0258	0.2569	0.237	0.9683	0.0236	0.6452	0.4005	0.7045	0.5999	0.722	0.2614	0.8277		0.8799	1.1237	0.7705	1.477	1.0831	0.9894	1.1767	1.3269		100	100	100	100	100	100
	1731			2-hydroxysebacate	LC/MS neg	63357		HMDB0000424	128458					1.08151	1.29	0.92	0.92	1.29		0.8874	0.8253	0.4523	0.597	0.2383	0.9683	0.1974	0.785	0.743	0.8094	0.4328	0.647	0.3738	0.8689		1.0993	1.0987	0.9581	1.2393	1.1894	1.2404	1.1384	1.1889		100	100	100	100	95	100
	1759		Fatty Acid, Amide	N-linoleoylserine*	LC/MS neg	61823								0.721917	0.78	0.65	0.64	0.77		0.0317	0.3019	0.0143	0.237	0.3249	0.9683	0.2927	0.7952	0.0112	0.2728	0.0207	0.3825	0.4081	0.878		1.3852	1.3922	1.5657	1.2188	0.993	1.2048	0.7813	1		100	100	100	100	100	100
	1760			linoleamide (18:2n6)	LC/MS pos late	32455		HMDB0062656	6435901					2.74228	2.76	2.73	1.32	1.34		0.7048	0.776	0.4008	0.5779	0.9337	0.978	0.61	0.9145	0.488	0.7286	0.7289	0.7545	0.8426	0.9953		2.7297	4.3893	2.3375	6.441	5.826	3.1219	8.5302	7.4856		100	100	100	100	95	100
	1766			oleamide	LC/MS neg	32458	C19670	HMDB0002117	5283387					1.66199	1.97	1.46	1.11	1.5		0.5016	0.7176	0.4783	0.6063	0.7622	0.9752	0.7838	0.9328	0.4487	0.7196	0.4655	0.6607	0.8032	0.9922		1.9224	2.2789	1.535	3.0228	2.8385	2.3098	3.3672	3.195		100	100	100	100	100	100
	1772		Fatty Acid, Amino	2-aminoheptanoate	LC/MS pos early	43761		HMDB0094649	227939					1.20162	1.18	1.22	1.21	1.18		0.2899	0.6058	0.2516	0.499	0.9163	0.978	0.3992	0.8592	0.4316	0.7092	0.472	0.6608	0.4336	0.8882		1.0897	1.091	0.9996	1.1825	1.308	1.1798	1.4362	1.3094		100	100	100	100	100	100
	1777			2-aminooctanoate	LC/MS pos late	43343		HMDB0000991	69522					1.23519	1.43	1.06	0.83	1.12		0.6579	0.7632	0.2222	0.481	0.5335	0.9683	0.2178	0.785	0.6473	0.7814	0.4255	0.6449	0.9033	1		1.0111	1.1587	0.9546	1.3627	1.1013	1.0675	1.1351	1.2489		100	100	100	100	100	100
	1778			N-acetyl-2-aminooctanoate*	LC/MS neg	62059		HMDB0059745	95555					1.62829	1.98	1.37	0.95	1.37		0.3407	0.6415	0.0191	0.24	0.3138	0.9683	0.0256	0.6452	0.2859	0.6561	0.9666	0.811	0.1913	0.7682		0.9198	1.1549	0.7764	1.5334	1.2627	1.0633	1.462	1.4977		100	100	100	100	100	100
	1790		Fatty Acid Metabolism (also BCAA Metabolism)	butyrylcarnitine (C4)	LC/MS pos early	32412	C02862	HMDB0002013	439829					0.951927	1.02	0.9	1.19	1.35		0.2439	0.5616	0.5387	0.6238	0.5804	0.9683	0.9666	0.9453	0.3829	0.6972	0.6403	0.7324	0.2503	0.8209		1.1649	1.0007	0.9896	1.0118	1.2731	1.3402	1.206	1.1089		100	100	100	100	100	100
	1793			propionylcarnitine (C3)	LC/MS pos early	32452	C03017	HMDB0000824	107738					1.14561	0.88	1.4	1.66	1.05		0.0628	0.3419	0.5457	0.6244	0.3107	0.9683	0.7801	0.9328	0.2275	0.6313	0.0338	0.4159	0.5507	0.9291		0.98	0.9002	0.9576	0.8428	1.2025	1.0025	1.4025	1.1227		100	100	100	100	100	100
	1796			methylmalonate (MMA)	LC/MS polar	1496	C02170	HMDB0000202	487					1.16936	1.37	1.02	0.98	1.31		0.7175	0.7761	0.3311	0.5412	0.368	0.9683	0.2117	0.785	0.9562	0.8516	0.6837	0.7431	0.3976	0.878		1.1467	1.1731	0.992	1.3542	1.3145	1.3014	1.3276	1.3409		100	100	100	100	100	100
	1797			2-methylmalonylcarnitine (C4-DC)	LC/MS pos early	35482		HMDB0013133	53481628					1.39148	1.21	1.61	1.15	0.86		0.9918	0.8367	0.0131	0.237	0.386	0.9683	0.2489	0.7881	0.0131	0.2977	0.5095	0.6752	0.5642	0.9343		0.7699	0.9108	0.826	0.9957	0.9304	0.7139	1.1469	1.0713		79	86	75	100	90	83
	1803		Fatty Acid Metabolism (Acyl Glutamine)	hexanoylglutamine	LC/MS neg	54907								0.703266	0.63	0.8	0.91	0.72		0.6268	0.7524	0.0977	0.3843	0.9322	0.978	0.285	0.7934	0.1884	0.598	0.6683	0.7408	0.7875	0.9875		1.9718	1.8749	2.296	1.4537	1.4836	1.6476	1.3196	1.3867		100	100	100	100	100	100
	1806			4-methylhexanoylglutamine	LC/MS neg	62735								0.840625	0.78	0.92	0.84	0.71		0.6168	0.7505	0.732	0.6912	0.8339	0.9752	0.9289	0.9453	0.6789	0.787	0.5946	0.7186	0.845	0.9953		1.2982	1.354	1.5192	1.1889	1.0355	1.0772	0.9937	1.0913		64	79	75	83	57	50
	1833		Fatty Acid Metabolism (Acyl Glycine)	trans-2-hexenoylglycine	LC/MS neg	61798								0.619812	0.51	0.82	0.85	0.53		0.0935	0.3906	0.1222	0.4204	0.4656	0.9683	0.1285	0.7227	0.5282	0.7385	0.4627	0.6607	0.1078	0.7608		1.2336	1.2192	1.6135	0.8249	0.7789	0.8536	0.7042	0.7646		64	71	75	67	48	50
	1836			cis-3,4-methyleneheptanoylglycine	LC/MS neg	64386								1.25939	0.93	1.74	1.29	0.69		0.6612	0.7632	0.2854	0.5113	0.0859	0.9683	0.6482	0.9164	0.0399	0.4259	0.3258	0.6183	0.1472	0.7608		0.9669	1.1022	1.143	1.0613	1.0825	0.7908	1.3741	1.2177		100	100	100	100	100	100
	1839			N-octanoylglycine	LC/MS neg	43502		HMDB0000832	84290					0.714315	0.49	1.3	1	0.38		0.0178	0.2868	0.1409	0.4329	0.011	0.8182	0.0081	0.6452	0.3773	0.6972	0.8803	0.7933	0.0015	0.5551		0.9794	1.059	1.4192	0.6988	0.6199	0.5395	0.7003	0.6996		71	79	100	50	48	33
	1845			N-palmitoylglycine	LC/MS neg	42092		HMDB0013034	151008					0.957416	0.93	0.99	0.9	0.85		0.3961	0.6639	0.963	0.7473	0.9772	0.9807	0.9905	0.9453	0.9551	0.8516	0.5374	0.6854	0.5551	0.9292		1.0215	1.0665	1.1043	1.0287	0.933	0.9386	0.9273	0.978		100	100	100	100	100	100
	1849			N-linoleoylglycine	LC/MS neg	32462			6433346					0.993936	0.99	1	0.71	0.7		0.0226	0.2868	0.8928	0.736	0.9914	0.9807	0.9337	0.9453	0.913	0.8491	0.0803	0.4884	0.1191	0.7608		1.0225	1.1981	1.2058	1.1904	0.8407	0.8392	0.8421	1.0163		93	93	100	83	86	83
	1853			3-hydroxybutyroylglycine**	LC/MS pos early	62064								0.643548	0.61	0.7	0.71	0.62		0.2302	0.5506	0.5421	0.6241	0.9657	0.978	0.7033	0.9195	0.6241	0.7672	0.3493	0.6302	0.4345	0.8882		2.0791	2.0647	2.567	1.5624	1.3524	1.5912	1.1136	1.338		100	100	100	100	100	100
	1859			picolinoylglycine	LC/MS neg	63057		HMDB0059766	11788622					1.15669	1.23	1.11	1.28	1.42		0.0489	0.3303	0.3917	0.5708	0.9119	0.978	0.5157	0.8848	0.5742	0.7545	0.156	0.5365	0.1571	0.7608		0.8922	0.8225	0.7388	0.9062	1.1018	1.0457	1.1579	1.032		93	93	88	100	100	100
	1862		Fatty Acid Metabolism (Acyl Carnitine, Short Chain)	acetylcarnitine (C2)	LC/MS pos early	32198	C02571	HMDB0000201	7045767					0.802126	0.82	0.78	1.01	1.06		0.9137	0.8282	0.0778	0.3522	0.8493	0.9757	0.282	0.7934	0.1408	0.5717	0.9512	0.8091	0.8413	0.9953		1.1947	1.0579	1.1608	0.9551	1.095	1.2286	0.9615	0.9583		100	100	100	100	100	100
	1866		Fatty Acid Metabolism (Acyl Carnitine, Medium Chain)	hexanoylcarnitine (C6)	LC/MS pos early	32328		HMDB0000756	6426853					0.866656	0.86	0.88	1.02	1		0.638	0.7553	0.2162	0.4796	0.5368	0.9683	0.215	0.785	0.6357	0.776	0.4158	0.638	0.9208	1		1.2389	1.1523	1.2408	1.0638	1.1603	1.237	1.0836	1.0737		100	100	100	100	100	100
	1874			octanoylcarnitine (C8)	LC/MS pos late	33936	C02838	HMDB0000791	11953814;123701					0.964508	0.97	0.96	0.97	0.98		0.4505	0.6946	0.2913	0.5153	0.6006	0.9683	0.2907	0.7952	0.6858	0.787	0.3396	0.6247	0.8756	0.9953		1.2989	1.2929	1.3128	1.273	1.2588	1.285	1.2327	1.2528		100	100	100	100	100	100
	1878			cis-3,4-methyleneheptanoylcarnitine	LC/MS pos late	64389								1.12433	0.99	1.3	1.01	0.77		0.1434	0.4728	0.2554	0.499	0.2636	0.9683	0.9893	0.9453	0.0949	0.5013	0.7873	0.775	0.0864	0.7608		0.9684	1.0882	1.0951	1.0814	0.969	0.8417	1.0963	1.0888		100	100	100	100	100	100
	1879			nonanoylcarnitine (C9)	LC/MS pos late	61775		HMDB0013288	91825642					1.13852	0.96	1.35	1.16	0.82		0.646	0.7593	0.6054	0.6448	0.3723	0.9683	0.7988	0.9331	0.2927	0.6609	0.3124	0.6133	0.7691	0.9875		1.0944	1.1755	1.1994	1.1515	1.1649	0.9893	1.3405	1.246		93	100	100	100	95	83
	1882			decanoylcarnitine (C10)	LC/MS pos late	33941		HMDB0000651	10245190					0.909593	0.88	0.94	1.05	0.98		0.46	0.6967	0.2551	0.499	0.5777	0.9683	0.2568	0.7909	0.6575	0.7833	0.3331	0.6222	0.9017	1		1.376	1.3046	1.3908	1.2184	1.323	1.3612	1.2848	1.2516		100	100	100	100	100	100
	1883			laurylcarnitine (C12)	LC/MS pos late	34534		HMDB000225	168381					0.809571	0.79	0.82	1.31	1.27		0.2119	0.528	0.3035	0.5282	0.8919	0.9772	0.5464	0.8975	0.3816	0.6972	0.4001	0.6317	0.3509	0.8621		1.4042	1.1113	1.2397	0.9828	1.4298	1.5687	1.2908	1.1368		100	100	100	100	100	100
	1884		Fatty Acid Metabolism (Acyl Carnitine, Long Chain Saturated)	myristoylcarnitine (C14)	LC/MS pos late	33952		HMDB0005066	6426854					0.801606	0.77	0.83	1.24	1.17		0.2699	0.5855	0.4539	0.597	0.7892	0.9752	0.7452	0.9224	0.4465	0.7196	0.5267	0.6848	0.3572	0.8621		1.2581	1.031	1.1622	0.8998	1.2356	1.354	1.1172	1.0085		100	100	100	100	100	100
	1886			palmitoylcarnitine (C16)	LC/MS pos late	44681	C02990	HMDB0000222	461					0.921638	0.89	0.95	1.09	1.03		0.5067	0.7176	0.6204	0.6525	0.7829	0.9752	0.6054	0.9145	0.8687	0.8434	0.4816	0.6677	0.7934	0.9875		1.0477	0.979	1.0347	0.9234	1.0343	1.0607	1.0079	0.9656		100	100	100	100	100	100
	1887			margaroylcarnitine (C17)*	LC/MS pos late	57512		HMDB0006210	53477803					0.915816	0.83	1.02	1.02	0.83		0.8913	0.8255	0.8154	0.7058	0.666	0.9683	0.6556	0.9186	0.8815	0.8441	0.8245	0.7817	0.703	0.9753		1.0287	1.0283	1.1236	0.9331	0.9425	0.9339	0.9511	0.9421		100	100	100	100	100	100
	1888			stearoylcarnitine (C18)	LC/MS pos late	34409		HMDB0000848	3006797					0.958228	0.92	1	1.1	1.01		0.5469	0.7336	0.7125	0.6838	0.8423	0.9757	0.7036	0.9195	0.8986	0.8465	0.5481	0.6901	0.7859	0.9875		1.0318	0.9853	1.0273	0.9433	1.0352	1.0363	1.0341	0.9887		100	100	100	100	100	100
	1889			arachidoylcarnitine (C20)*	LC/MS pos late	57513		HMDB0006460	53477833					0.834778	0.83	0.84	1.28	1.25		0.1078	0.4107	0.2308	0.4834	0.8063	0.9752	0.5179	0.8854	0.2788	0.6561	0.2989	0.6091	0.2112	0.7865		1.0846	0.8796	0.9638	0.7953	1.1104	1.2054	1.0154	0.9054		93	93	88	100	95	100
	1890			behenoylcarnitine (C22)*	LC/MS pos late	57514		HMDB0062468	71464577					1.1279	0.91	1.33	1.55	1.07		0.1973	0.5234	0.8549	0.7225	0.4103	0.9683	0.6657	0.9186	0.4505	0.7196	0.1166	0.507	0.7482	0.9875		0.7576	0.7007	0.7322	0.6691	0.9115	0.783	1.0399	0.8545		57	43	50	33	57	67
	1891			lignoceroylcarnitine (C24)*	LC/MS pos late	57515		HMDB0240665						1.16704	1.08	1.24	1.27	1.11		0.3011	0.6119	0.5499	0.6255	0.8236	0.9752	0.8006	0.9331	0.5385	0.7407	0.3458	0.6294	0.5831	0.9369		1.0189	1.0064	0.9672	1.0457	1.2015	1.0706	1.3325	1.1891		100	100	100	100	100	100
	1892			cerotoylcarnitine (C26)*	LC/MS pos late	57516		HMDB0006347	53477828					1.09031	1.05	1.13	1.15	1.07		0.5052	0.7176	0.7071	0.6815	0.9475	0.978	0.8351	0.9333	0.7404	0.8092	0.5826	0.7134	0.6863	0.9697		1.0088	0.9983	0.9739	1.0227	1.1104	1.0437	1.1772	1.0999		100	100	100	100	100	100
	1902		Fatty Acid Metabolism (Acyl Carnitine, Monounsaturated)	cis-4-decenoylcarnitine (C10:1)	LC/MS pos late	38178		HMDB0013205	57357170					0.878782	0.84	0.92	1.03	0.94		0.7386	0.7811	0.2585	0.5006	0.4856	0.9683	0.2222	0.785	0.7406	0.8092	0.4402	0.649	0.8061	0.9933		1.0906	1.035	1.1262	0.9439	1.0139	1.0551	0.9728	0.9584		100	100	100	100	100	100
	1903			undecenoylcarnitine (C11:1)	LC/MS pos late	63613								0.91239	0.93	0.9	1.13	1.17		0.3468	0.6462	0.4521	0.597	0.8793	0.9757	0.544	0.8975	0.6514	0.7814	0.4121	0.6349	0.5943	0.9439		1.1106	0.9871	1.0234	0.9509	1.1367	1.1978	1.0757	1.0133		100	100	100	100	100	100
	1904			5-dodecenoylcarnitine (C12:1)	LC/MS pos late	61769		HMDB13326	91825571					0.723172	0.72	0.73	0.92	0.91		0.9914	0.8367	0.3081	0.5304	0.5523	0.9683	0.2806	0.7934	0.7461	0.8096	0.6496	0.7384	0.695	0.9733		1.3987	1.2606	1.4657	1.0554	1.1496	1.3317	0.9675	1.0115		93	86	88	83	100	100
	1906			myristoleoylcarnitine (C14:1)*	LC/MS pos late	48182		HMDB0240588	129691961					0.620673	0.57	0.67	1.13	0.96		0.5186	0.722	0.0723	0.3499	0.7491	0.9752	0.1531	0.7463	0.2575	0.6517	0.4698	0.6608	0.8262	0.9953		1.6843	1.3505	1.7193	0.9817	1.3792	1.6493	1.1091	1.0454		100	100	100	100	100	100
	1907			palmitoleoylcarnitine (C16:1)*	LC/MS pos late	53223		HMDB0013207	71464547					0.710243	0.75	0.67	0.98	1.09		0.6202	0.7521	0.1388	0.43	0.7185	0.9742	0.444	0.8659	0.1678	0.5888	0.9189	0.8023	0.5662	0.9343		1.357	1.138	1.3005	0.9755	1.1828	1.4135	0.9521	0.9638		100	100	100	100	100	100
	1908			oleoylcarnitine (C18:1)	LC/MS pos late	35160		HMDB0005065	6441392					0.847845	0.81	0.89	0.99	0.9		0.6774	0.7671	0.2953	0.519	0.8208	0.9752	0.3924	0.8592	0.5352	0.7407	0.8867	0.7938	0.6666	0.9652		1.2553	1.1955	1.3216	1.0695	1.1241	1.189	1.0592	1.0643		100	100	100	100	100	100
	1909			eicosenoylcarnitine (C20:1)*	LC/MS pos late	57519								0.633555	0.6	0.66	1.09	1		0.5112	0.719	0.0165	0.237	0.99	0.9807	0.0975	0.7173	0.068	0.4655	0.6151	0.7278	0.6649	0.9638		1.4144	1.1355	1.415	0.856	1.175	1.4139	0.9361	0.8961		100	100	100	100	100	100
	1911			nervonoylcarnitine (C24:1)*	LC/MS pos late	57531		HMDB0006509						0.926533	0.83	1.04	1.01	0.81		0.3887	0.6614	0.6633	0.6683	0.4246	0.9683	0.4086	0.8592	0.7835	0.8227	0.9614	0.8101	0.2674	0.8277		1.044	1.0558	1.1512	0.9604	0.9555	0.9367	0.9743	0.9673		79	93	88	100	76	67
	1912			ximenoylcarnitine (C26:1)*	LC/MS pos late	57517								0.829694	0.84	0.82	0.96	0.99		0.8793	0.8233	0.1174	0.4194	0.6147	0.9683	0.4653	0.8715	0.1221	0.542	0.6232	0.7295	0.8131	0.9933		1.209	1.1199	1.2146	1.0252	1.0922	1.2034	0.981	1.0031		100	100	100	100	100	100
	1913		Fatty Acid Metabolism (Acyl Carnitine, Polyunsaturated)	linoleoylcarnitine (C18:2)*	LC/MS pos late	46223		HMDB0006469	6450015					0.955116	0.89	1.02	1.04	0.91		0.7341	0.7808	0.7798	0.6979	0.5862	0.9683	0.5807	0.9098	0.842	0.8351	0.8774	0.7933	0.5536	0.9292		1.0917	1.0809	1.1411	1.0207	1.0536	1.0424	1.0648	1.0427		100	100	100	100	100	100
	1914			linolenoylcarnitine (C18:3)*	LC/MS pos late	57511								1.33604	1.75	0.86	0.43	0.87		0.1669	0.4944	0.8367	0.7141	0.5627	0.9683	0.5985	0.9145	0.7791	0.8226	0.1436	0.5213	0.5816	0.9369		1.0594	1.5574	1.1324	1.9825	0.9173	0.9864	0.8482	1.4154		93	93	100	83	90	83
	1915			dihomo-linoleoylcarnitine (C20:2)*	LC/MS pos late	57520								0.735102	0.77	0.71	0.98	1.06		0.9633	0.8346	0.0151	0.237	0.7823	0.9752	0.1341	0.7398	0.0405	0.4259	0.8089	0.7794	0.8771	0.9953		1.2552	1.0766	1.2198	0.9334	1.1012	1.2905	0.912	0.9227		100	100	100	100	95	100
	1917			dihomo-linolenoylcarnitine (C20:3n3 or 6)*	LC/MS pos late	57521								0.940664	0.9	0.98	1.07	0.98		0.6441	0.7591	0.6793	0.6706	0.6668	0.9683	0.5718	0.9083	0.9897	0.8587	0.9811	0.8124	0.5499	0.9291		1.1359	1.0888	1.146	1.0317	1.1156	1.1259	1.1053	1.0685		100	100	100	100	100	100
	1921			adrenoylcarnitine (C22:4)*	LC/MS pos late	57528								1.11035	0.97	1.24	1.39	1.09		0.1519	0.4842	0.5594	0.6291	0.3951	0.9683	0.8562	0.9338	0.2844	0.6561	0.0903	0.507	0.6869	0.9697		0.657	0.6202	0.6298	0.6106	0.7663	0.6841	0.8484	0.7295		14	7	13	0	33	17
	1924			docosahexaenoylcarnitine (C22:6)*	LC/MS pos late	57523								0.708527	0.77	0.67	1.23	1.42		0.0218	0.2868	0.003	0.1476	0.7138	0.9736	0.0653	0.666	0.0114	0.2728	0.1351	0.507	0.0711	0.7604		1.161	0.8481	0.9586	0.7377	1.1356	1.3635	0.9076	0.8226		100	100	100	100	95	100
	1929		Fatty Acid Metabolism (Acyl Carnitine, Dicarboxylate)	adipoylcarnitine (C6-DC)	LC/MS pos early	52988		HMDB0061677	71296139					0.475356	0.4	0.56	1.31	0.92		0.9512	0.8342	0.0048	0.1583	0.3951	0.9683	0.0136	0.6452	0.1129	0.5212	0.4934	0.6731	0.595	0.9439		2.1121	1.5357	2.2016	0.8698	1.5804	2.0227	1.1382	1.004		100	100	100	100	100	100
	1937			suberoylcarnitine (C8-DC)	LC/MS pos early	52990								0.278555	0.33	0.24	0.88	1.24		0.9981	0.838	0.0031	0.1476	0.8065	0.9752	0.0563	0.6604	0.0146	0.3056	0.8556	0.7876	0.8682	0.9953		2.173	1.2901	1.9378	0.6423	1.4882	2.4081	0.5683	0.6053		79	64	75	50	57	83
	1939			octadecanedioylcarnitine (C18-DC)*	LC/MS pos late	61867								0.668344	0.46	0.96	1.5	0.72		0.6701	0.7662	0.0523	0.3184	0.0938	0.9683	0.0174	0.6452	0.8294	0.8351	0.1156	0.507	0.3904	0.878		1.371	1.1624	1.5927	0.7321	1.1249	1.1492	1.1005	0.9163		100	100	100	100	100	100
	1940			octadecenedioylcarnitine (C18:1-DC)*	LC/MS pos late	61865								0.437151	0.41	0.47	0.98	0.86		0.9905	0.8367	0.015	0.237	0.7915	0.9752	0.0658	0.666	0.0932	0.5013	0.8498	0.7865	0.8529	0.9953		2.0947	1.5916	2.257	0.9262	1.4187	1.9324	0.9051	0.9157		100	93	100	83	95	100
	1941		Fatty Acid Metabolism (Acyl Carnitine, Hydroxy)	(R)-3-hydroxybutyrylcarnitine	LC/MS pos early	43264		HMDB0013127	53481617					0.617024	0.58	0.68	0.78	0.66		0.8468	0.8119	0.221	0.4808	0.7979	0.9752	0.3198	0.8226	0.4631	0.7202	0.9623	0.8101	0.7632	0.9875		1.5296	1.4491	1.8377	1.0606	1.0242	1.2215	0.827	0.9438		86	71	88	50	67	83
	1942			(S)-3-hydroxybutyrylcarnitine	LC/MS pos early	52984		HMDB0013127	71464477					0.772353	0.59	1.02	1.28	0.73		0.9044	0.8282	0.5043	0.6158	0.7198	0.9745	0.4916	0.8715	0.8156	0.8306	0.8579	0.7881	0.7481	0.9875		0.8008	0.7334	0.9239	0.5429	0.6859	0.6776	0.6942	0.6185		36	36	38	33	29	33
	1943			3-hydroxyhexanoylcarnitine (1)	LC/MS pos early	62557								0.784047	0.8	0.77	0.91	0.95		0.6713	0.7662	0.2636	0.5029	0.6364	0.9683	0.6604	0.9186	0.2347	0.6358	0.5019	0.6731	0.974	1		1.4267	1.3172	1.4625	1.1718	1.2282	1.3909	1.0655	1.1186		100	100	100	100	100	100
	1946			3-hydroxyoctanoylcarnitine (1)	LC/MS pos early	64393								1.06331	0.97	1.16	1.14	0.96		0.5326	0.7265	0.7962	0.7	0.5285	0.9683	0.802	0.9331	0.5056	0.7318	0.3487	0.6302	0.9966	1		0.9603	0.9672	0.9821	0.9523	1.0143	0.9386	1.09	1.0211		100	100	100	100	100	100
	1947			3-hydroxyoctanoylcarnitine (2)	LC/MS pos early	64394								1.01868	0.98	1.05	1.2	1.13		0.0987	0.4009	0.8526	0.7216	0.6636	0.9683	0.6772	0.9186	0.8515	0.8387	0.1183	0.507	0.4032	0.878		1.0169	0.9478	0.9558	0.9397	1.105	1.078	1.132	1.0359		100	100	100	100	100	100
	1949			3-hydroxydecanoylcarnitine	LC/MS pos late	63358		HMDB0061636	121454166					0.955901	0.83	1.08	1.33	1.02		0.2137	0.5295	0.5583	0.6291	0.3587	0.9683	0.3147	0.8186	0.8005	0.8295	0.1089	0.507	0.8222	0.9947		1.0998	0.9952	1.0866	0.9037	1.1559	1.113	1.1989	1.0513		100	100	100	100	100	100
	1951			3-hydroxyoleoylcarnitine	LC/MS pos late	61840			129637446					0.585037	0.56	0.61	1.04	0.95		0.5647	0.743	0.0906	0.3753	0.8453	0.9757	0.202	0.785	0.254	0.6505	0.5633	0.7005	0.7977	0.9891		1.7122	1.3682	1.7538	0.9826	1.3456	1.6705	1.0207	1.0017		100	79	100	50	95	100
	1953		Carnitine Metabolism	deoxycarnitine	LC/MS pos early	36747	C01181	HMDB0001161	22620					1.02209	1.01	1.03	1.37	1.33		0.0115	0.2395	0.5289	0.6232	0.6591	0.9683	0.8987	0.9404	0.4231	0.7092	0.0254	0.4109	0.1428	0.7608		0.9869	0.8503	0.8477	0.8528	1.1452	1.126	1.1645	1.0087		100	100	100	100	100	100
	1954			carnitine	LC/MS pos early	15500	C00487 C00308	HMDB0000062	288					0.861726	0.93	0.81	1.07	1.23		0.1061	0.4075	0.0997	0.3861	0.528	0.9683	0.4827	0.8715	0.0897	0.4969	0.4473	0.6493	0.1325	0.7608		1.2157	1.0495	1.088	1.0109	1.2139	1.3435	1.0843	1.0476		100	100	100	100	100	100
	1958		Ketone Bodies	acetoacetate	LC/MS pos early	33963	C00164	HMDB0000060	96					0.0842384	0.03	0.18	2.83	0.52		0.975	0.8346	0.0038	0.1522	0.2238	0.9683	0.0063	0.6452	0.1663	0.5888	0.3713	0.6317	0.3998	0.878		3.5815	2.4315	4.7053	0.1577	1.4517	2.4577	0.4457	0.3017		64	43	75	0	43	50
	1960			3-hydroxybutyrate (BHBA)	LC/MS polar	542	C03197 C01089	HMDB0000011 HMDB0000357 HMDB0000442	441;94318;92135					0.46647	0.52	0.4	0.57	0.74		0.8891	0.8255	0.0942	0.38	0.944	0.978	0.2752	0.7934	0.1874	0.598	0.8751	0.7933	0.963	1		3.8607	3.3606	4.4268	2.2943	2.301	3.2945	1.3074	1.8009		100	100	100	100	100	100
	1965		Fatty Acid Metabolism (Acyl Choline)	palmitoylcholine	LC/MS pos late	52944		HMDB0240592	151731					0.857251	0.89	0.83	0.89	0.96		0.3935	0.6631	0.1818	0.4558	0.6058	0.9683	0.5751	0.9083	0.1669	0.5888	0.3064	0.6091	0.819	0.9939		1.0585	1.021	1.0822	0.9599	0.9449	1.0347	0.855	0.9074		100	100	100	100	100	100
	1966			oleoylcholine	LC/MS pos late	53260		HMDB0240596	59040790					0.808863	0.87	0.74	0.82	0.97		0.3364	0.6377	0.1652	0.455	0.4135	0.9683	0.6938	0.9195	0.1015	0.5152	0.1855	0.5485	0.9218	1		1.1892	1.1344	1.2101	1.0587	1.0166	1.1682	0.865	0.9619		100	100	100	100	100	100
	1967			palmitoloelycholine	LC/MS pos late	53257		HMDB0013208						0.768557	1.02	0.6	0.9	1.52		0.7163	0.7761	0.263	0.5029	0.193	0.9683	0.899	0.9404	0.0734	0.4655	0.4751	0.6625	0.2635	0.8277		1.1653	0.934	0.9258	0.9421	1.1269	1.4048	0.849	0.8956		86	86	75	100	76	100
	1969			dihomo-linolenoyl-choline	LC/MS pos late	53262		HMDB0240646						0.836645	0.81	0.86	0.92	0.86		0.3688	0.6565	0.3054	0.5286	0.8138	0.9752	0.5933	0.9132	0.3446	0.6963	0.3952	0.6317	0.6541	0.9581		1.0419	1.0136	1.1177	0.9096	0.8999	0.9661	0.8338	0.8717		100	100	100	100	100	100
	1970			linoleoylcholine*	LC/MS pos late	57463		HMDB0013213	53481656					0.849712	0.95	0.75	0.78	0.99		0.3035	0.6136	0.1737	0.4558	0.2913	0.9683	0.8321	0.9333	0.074	0.4655	0.122	0.507	0.9856	1		1.1651	1.139	1.1685	1.1096	1.016	1.1616	0.8704	0.99		100	100	100	100	100	100
	1972			stearoylcholine*	LC/MS pos late	57464		HMDB0240648	90111					0.939432	0.94	0.94	0.86	0.86		0.2927	0.6087	0.5627	0.6291	0.7189	0.9742	0.8826	0.9398	0.4823	0.7273	0.2906	0.6091	0.6385	0.955		1.0484	1.0914	1.1249	1.0579	0.942	0.972	0.9119	0.9849		100	100	100	100	100	100
	1973			docosahexaenoylcholine	LC/MS pos late	53263		HMDB0240647						0.863239	1.02	0.72	0.77	1.08		0.3717	0.6565	0.5171	0.6196	0.5051	0.9683	0.9898	0.9453	0.3264	0.687	0.2448	0.5865	0.8773	0.9953		1.0639	1.0295	1.0216	1.0375	0.9527	1.1062	0.7992	0.9184		100	100	100	100	100	100
	1974			arachidonoylcholine	LC/MS pos late	53261		HMDB0240583	122198216					0.96754	0.81	1.22	0.94	0.63		0.0726	0.3566	0.9635	0.7473	0.2619	0.9683	0.4313	0.8612	0.4171	0.7092	0.5953	0.7186	0.0529	0.7604		1.0721	1.1937	1.3174	1.0699	0.9157	0.8267	1.0047	1.0373		100	100	100	100	100	100
	1981		Fatty Acid, Monohydroxy	2-hydroxyheptanoate*	LC/MS polar	61827			2750949					1.02886	1.05	1.01	1.09	1.13		0.4085	0.6679	0.9376	0.7446	0.7935	0.9752	0.8196	0.9333	0.8905	0.8457	0.6699	0.7408	0.4654	0.8977		1.0637	1.0241	1.0009	1.0473	1.1341	1.1266	1.1416	1.0944		100	100	100	100	100	100
	1982			2-hydroxyoctanoate	LC/MS neg	22036		HMDB0002264	5312860;6995013;94180					1.46583	1.88	1.08	0.62	1.09		0.4348	0.6863	0.0672	0.343	0.14	0.9683	0.0291	0.6452	0.7762	0.8226	0.0937	0.507	0.631	0.955		0.9437	1.3038	0.9048	1.7028	1.0231	0.9825	1.0638	1.3833		100	100	100	100	100	100
	1984			2-hydroxydecanoate	LC/MS neg	42489		HMDB0094656	21488					1.3319	1.7	1.02	0.71	1.18		0.9592	0.8346	0.2216	0.481	0.2579	0.9683	0.1175	0.7227	0.9436	0.8511	0.3735	0.6317	0.4658	0.8977		1.0259	1.2704	0.9423	1.5985	1.1219	1.1095	1.1343	1.3664		100	100	100	100	100	100
	1988			2-hydroxylaurate	LC/MS neg	52916			97783					1.03067	1.02	1.04	1.43	1.41		0.0032	0.1662	0.9133	0.7421	0.6982	0.9717	0.8514	0.9333	0.7096	0.7955	0.0114	0.2852	0.0694	0.7604		1.0728	0.9	0.8908	0.9092	1.2784	1.2548	1.3021	1.1057		100	100	100	100	100	100
	1989			2-hydroxymyristate	LC/MS neg	32413	C13790	HMDB0002261	1563					0.805049	0.94	0.69	0.81	1.1		0.6534	0.7632	0.1311	0.4239	0.269	0.9683	0.7773	0.9321	0.0535	0.438	0.2453	0.5865	0.6552	0.9581		1.1962	1.1014	1.1382	1.0646	1.0577	1.2541	0.8613	0.963		93	86	88	83	81	100
	1990			2-hydroxypalmitate	LC/MS neg	35675		HMDB0031057	12575964;92836;11065598					0.716532	0.73	0.71	0.92	0.95		0.489	0.7146	0.0008	0.1476	0.6707	0.9683	0.0357	0.6452	0.0041	0.2381	0.4034	0.6317	0.857	0.9953		1.2908	1.1442	1.325	0.9634	1.0715	1.2565	0.8864	0.9249		100	100	100	100	100	100
	1993			2-hydroxystearate	LC/MS neg	17945	C03045 C03042	HMDB0062549	69417;439885;439887					0.777699	0.75	0.81	0.92	0.85		0.2093	0.5247	0.0164	0.237	0.8158	0.9752	0.0724	0.666	0.0941	0.5013	0.4382	0.649	0.3167	0.8429		1.2735	1.204	1.379	1.029	1.0599	1.168	0.9517	0.9904		100	100	100	100	100	100
	1995			2-hydroxyarachidate*	LC/MS neg	61700			5225199					1.20697	1.27	1.16	1.32	1.44		0.1386	0.4696	0.2535	0.499	0.5973	0.9683	0.2636	0.7914	0.64	0.7785	0.4649	0.6607	0.1781	0.7608		0.9359	0.8697	0.7659	0.9736	1.1958	1.106	1.2856	1.1296		93	93	88	100	95	100
	1996			2-hydroxybehenate	LC/MS neg	57663		HMDB0061660	193484					1.17929	1.25	1.12	1.1	1.22		0.2347	0.555	0.1351	0.428	0.4166	0.9683	0.1239	0.7227	0.5976	0.7609	0.7727	0.7703	0.182	0.7608		0.9744	0.9863	0.8779	1.0946	1.1372	1.0708	1.2036	1.1491		100	100	100	100	100	100
	1998			2-hydroxynervonate*	LC/MS neg	61698			5312783					0.802773	0.99	0.66	0.9	1.35		0.6154	0.7503	0.2099	0.475	0.2481	0.9683	0.9452	0.9453	0.0749	0.4655	0.619	0.7284	0.2671	0.8277		1.2118	1.0294	1.0329	1.0259	1.1552	1.3907	0.9197	0.9728		100	100	100	100	100	100
	2001			3-hydroxyhexanoate	LC/MS neg	53230		HMDB0061652 HMDB0010718	151492					0.822238	0.67	1.05	1.01	0.65		0.5369	0.7265	0.5617	0.6291	0.6137	0.9683	0.4675	0.8715	0.9545	0.8516	0.9321	0.8031	0.4524	0.8977		1.2303	1.2521	1.4953	1.0089	0.9899	0.9654	1.0143	1.0116		93	93	88	100	100	100
	2002			3-hydroxyoctanoate	LC/MS neg	22001	C20793	HMDB0001954	26613					1.44101	0.63	2.66	2.78	0.66		0.6713	0.7662	0.8117	0.7055	0.1141	0.9683	0.3599	0.846	0.1716	0.5888	0.1335	0.507	0.428	0.8874		1.0553	1.0377	1.2706	0.8048	1.5383	0.8399	2.2367	1.5207		93	100	100	100	95	83
	2004			3-hydroxydecanoate	LC/MS neg	22053		HMDB0002203	26612					1.23973	0.74	1.89	1.95	0.77		0.5169	0.722	0.8885	0.7342	0.1905	0.9683	0.4281	0.8612	0.2756	0.6561	0.1449	0.523	0.6502	0.9565		1.0883	1.0739	1.2317	0.9162	1.3636	0.945	1.7822	1.3492		100	100	100	100	100	100
	2006			3-hydroxysebacate	LC/MS neg	31943		HMDB0000350	3017884					0.863693	0.51	1.26	2.19	0.89		0.7417	0.7817	0.4378	0.5945	0.7058	0.9717	0.4397	0.8659	0.7633	0.8181	0.5964	0.7192	0.9743	1		1.5135	1.2119	1.6041	0.8196	1.6088	1.4228	1.7947	1.3072		79	79	88	67	71	67
	2007			3-hydroxylaurate	LC/MS neg	32457		HMDB0000387	94216					0.986626	0.76	1.31	1.22	0.7		0.8359	0.8098	0.996	0.7519	0.3579	0.9683	0.538	0.8958	0.4868	0.7286	0.3982	0.6317	0.6304	0.955		1.1664	1.2027	1.3689	1.0365	1.1146	0.964	1.2652	1.1508		100	100	100	100	100	100
	2008			3-hydroxymyristate	LC/MS neg	21158		HMDB0061656	16064					1.16932	0.99	1.44	0.99	0.68		0.8272	0.8094	0.5827	0.6346	0.5303	0.9683	0.9578	0.9453	0.379	0.6972	0.7579	0.7662	0.5705	0.9343		1.1245	1.3282	1.3364	1.3201	1.1111	0.9126	1.3096	1.3149		100	100	100	100	100	100
	2017			5-hydroxyhexanoate	LC/MS neg	31938		HMDB0000525 HMDB0000409	170748					0.720654	0.84	0.64	1.11	1.45		0.0663	0.3451	0.0643	0.3396	0.4478	0.9683	0.4465	0.8693	0.0526	0.438	0.4013	0.6317	0.0828	0.7608		1.3145	0.9854	1.0735	0.8973	1.2763	1.5554	0.9973	0.9473		100	86	100	67	95	100
	2018			5-hydroxydecanoate	LC/MS neg	43011		HMDB0040329	1825					0.712741	0.72	0.71	1.42	1.46		0.0155	0.2757	0.076	0.3522	0.5101	0.9683	0.4388	0.8659	0.07	0.4655	0.1652	0.5365	0.0382	0.7064		1.2393	0.8688	1.0085	0.7292	1.2538	1.4702	1.0374	0.8833		93	79	88	67	95	100
	2023			8-hydroxyoctanoate	LC/MS neg	21239		HMDB0061914	69820					0.815573	0.83	0.8	1.26	1.3		0.113	0.4221	0.2552	0.499	0.7545	0.9752	0.5754	0.9083	0.2772	0.6561	0.3315	0.6211	0.2013	0.7733		1.2997	1.0329	1.129	0.9369	1.3268	1.4705	1.1832	1.06		100	93	100	83	100	100
	2024			9-hydroxystearate	LC/MS neg	47120		HMDB0061661	9570127					1.10212	1.61	0.77	0.73	1.53		0.8124	0.805	0.9699	0.7484	0.0723	0.9683	0.2307	0.785	0.1645	0.5888	0.2332	0.5842	0.1689	0.7608		0.9753	1.006	0.77	1.2419	1.0443	1.1806	0.9079	1.0749		93	86	88	83	90	100
	2032			16-hydroxypalmitate	LC/MS neg	39609	C18218	HMDB0006294	10466					0.995042	0.97	1.02	1.07	1.02		0.6322	0.7553	0.9632	0.7473	0.6468	0.9683	0.735	0.9224	0.757	0.8163	0.4832	0.6677	0.989	1		1.0488	1.0238	1.0394	1.0081	1.0687	1.0582	1.0791	1.0436		100	100	100	100	100	100
	2036			13-HODE + 9-HODE	LC/MS neg	37752	C14767 C14762	HMDB0004667 HMDB0004670	5312830;1424;5282947;5282944;5282945					1.50665	1.93	1.06	0.51	0.93		0.0965	0.3962	0.4491	0.5956	0.3878	0.9683	0.279	0.7934	0.9352	0.8506	0.0612	0.4717	0.578	0.9369		1.0382	1.5742	1.0763	2.0721	1.0282	1	1.0563	1.5642		100	100	100	100	95	100
	2051			hydroxy-undecanedioate (OH-C11:0-DC)*	LC/MS neg	63684								0.73918	0.75	0.73	1.31	1.33		0.075	0.3614	0.1006	0.388	0.9746	0.9807	0.274	0.7934	0.2055	0.6095	0.1843	0.5485	0.218	0.7921		1.3262	0.9922	1.1365	0.8479	1.3143	1.5158	1.1128	0.9803		100	100	100	100	100	100
	2052		Fatty Acid, Dihydroxy	12,13-DiHOME	LC/MS neg	38395	C14829	HMDB0004705	10236635					1.95765	2.34	1.43	0.44	0.72		0.3674	0.6554	0.2013	0.4716	0.3523	0.9683	0.1413	0.7398	0.7883	0.8236	0.1731	0.5413	0.9843	1		1.1451	2.2222	1.3301	3.1142	1.1646	0.96	1.3691	2.2417		93	93	88	100	100	100
	2053			9,10-DiHOME	LC/MS neg	38399	C14828	HMDB0004704	9966640					1.46513	1.94	1.04	0.6	1.12		0.4039	0.6658	0.6689	0.6683	0.3374	0.9683	0.3528	0.8412	0.6869	0.787	0.1819	0.5485	0.9321	1		1.1887	1.6476	1.1213	2.1738	1.2827	1.2562	1.3093	1.7416		100	100	100	100	86	100
	2055			2S,3R-dihydroxybutyrate	LC/MS polar	62950		HMDB0002453	10964471					1.25904	0.87	1.63	1.98	1.05		0.0248	0.2868	0.3242	0.5378	0.0745	0.9683	0.5752	0.9083	0.0407	0.4259	0.0036	0.2261	0.7329	0.9875		0.9126	0.8312	0.8908	0.7716	1.2304	0.9344	1.5264	1.149		100	100	100	100	100	100
	2056			2R,3R-dihydroxybutyrate	LC/MS polar	63109		HMDB0000498	13120901					0.998079	0.98	1.01	1.23	1.2		0.2078	0.5235	0.9884	0.7506	0.5184	0.9683	0.6714	0.9186	0.6199	0.7658	0.6382	0.7324	0.2028	0.7751		1.0409	0.9404	0.9483	0.9325	1.1393	1.1334	1.1453	1.0389		100	100	100	100	100	100
	2059			3,4-dihydroxybutyrate	LC/MS polar	62952		HMDB0000337	150929					0.950847	0.71	1.28	1.31	0.73		0.8254	0.8088	0.9923	0.7506	0.1658	0.9683	0.3517	0.841	0.2921	0.6609	0.3763	0.6317	0.2792	0.8294		1.2166	1.2029	1.4048	1.0011	1.1705	1.0284	1.3125	1.1568		100	100	100	100	100	100
	2089		Docosanoid	4-HDoHE	LC/MS neg	52947								5.49235	8.22	3.22	0.47	1.2		0.3879	0.6614	0.0188	0.24	0.3649	0.9683	0.0297	0.6452	0.2512	0.65	0.1879	0.5485	0.9768	1		0.366	1.5345	0.3327	2.7364	0.8417	0.3993	1.2841	2.0102		43	50	38	67	52	50
	2096		Eicosanoid	leukotriene B4	LC/MS neg	37530	C02165	HMDB0001085	5280492					5.55333	9.18	3.04	0.48	1.44		0.5448	0.7319	0.0814	0.3595	0.5868	0.9683	0.125	0.7227	0.3549	0.6963	0.3904	0.6317	0.9664	1		0.195	0.8126	0.1597	1.4655	0.4653	0.2303	0.7004	1.0829		21	36	25	50	38	17
	2150			5-HEPE	LC/MS neg	46297		HMDB0005081	6439678					4.04394	5.91	2.63	0.59	1.32		0.6948	0.7728	0.0389	0.2939	0.3172	0.9683	0.0413	0.6452	0.399	0.7045	0.2976	0.6091	0.6801	0.9679		0.4392	1.3062	0.3779	2.2345	0.9091	0.5005	1.3177	1.7761		50	57	38	83	62	67
	2157			5-HETE	LC/MS neg	37372	C04805	HMDB0011134	5280733					4.43938	6.14	3	0.58	1.18		0.3307	0.6307	0.1363	0.4292	0.953	0.978	0.2948	0.7961	0.2788	0.6561	0.438	0.649	0.5378	0.922		2.5784	8.4432	2.3642	14.5222	5.5817	2.7926	8.3709	11.4465		93	100	100	100	86	83
	2163			12-HETE	LC/MS neg	37536	C14777	HMDB0006111	5283155					2.06962	1.69	2.46	1.38	0.95		0.8365	0.8098	0.6067	0.6448	0.9867	0.9807	0.7379	0.9224	0.69	0.7876	0.8868	0.7938	0.8811	0.9959		1.7007	2.3474	1.7426	2.9521	2.8731	1.6588	4.0874	3.5198		100	100	100	100	100	100
	2170			12-HHTrE	LC/MS neg	57393	C20388	HMDB0012535	5283141					1.28258	0.76	1.95	2	0.78		0.6842	0.7684	0.9017	0.7394	0.9838	0.9807	0.9448	0.9453	0.9141	0.8491	0.7718	0.7703	0.7744	0.9875		0.8433	0.8348	0.9474	0.7222	1.0901	0.7392	1.441	1.0816		71	57	63	50	57	83
	2174			leukotriene B5	LC/MS neg	46342		HMDB0005073	5283125					2.16529	2.26	2.05	0.78	0.86		0.7499	0.7835	0.0062	0.1631	0.9236	0.978	0.0663	0.666	0.0301	0.3798	0.8671	0.791	0.7809	0.9875		0.5203	0.9107	0.5586	1.2629	0.7362	0.482	0.9903	1.1266		29	50	38	67	62	17
	2181		Endocannabinoid	oleoyl ethanolamide	LC/MS neg	38102		HMDB0002088	5283454					0.822422	0.88	0.77	0.89	1.01		0.6611	0.7632	0.3193	0.5331	0.5992	0.9683	0.749	0.9224	0.2559	0.6517	0.4707	0.6608	0.9531	1		1.3701	1.2785	1.3621	1.1948	1.2184	1.378	1.0587	1.1268		100	100	100	100	100	100
	2184			palmitoyl ethanolamide	LC/MS neg	38165	C16512	HMDB0002100	4671					0.922303	0.93	0.91	0.97	0.99		0.7195	0.7761	0.5742	0.6316	0.9088	0.978	0.7635	0.9263	0.6119	0.7645	0.7225	0.7543	0.8695	0.9953		1.1635	1.1285	1.1682	1.0889	1.1081	1.1589	1.0573	1.0731		100	100	100	100	100	100
	2185			stearoyl ethanolamide	LC/MS pos late	38625		HMDB0013078	27902					0.916183	0.88	0.96	0.92	0.83		0.1802	0.5026	0.4085	0.5818	0.7612	0.9752	0.4484	0.8701	0.693	0.7877	0.4308	0.647	0.2691	0.8287		1.1549	1.1819	1.2591	1.1047	1.031	1.0506	1.0114	1.0581		100	100	100	100	100	100
	2194			N-oleoyltaurine	LC/MS neg	39732			6437033					0.709843	0.89	0.55	0.68	1.09		0.6247	0.7521	0.2002	0.4716	0.4046	0.9683	0.7577	0.9257	0.1163	0.5255	0.323	0.6177	0.8155	0.9933		1.5371	1.3854	1.4683	1.3026	1.2428	1.606	0.8796	1.0911		100	100	100	100	100	100
	2195			N-stearoyltaurine	LC/MS neg	39730			168274					0.930959	0.91	0.95	0.8	0.77		0.1198	0.4383	0.9801	0.7485	0.8221	0.9752	0.8669	0.9356	0.8808	0.8441	0.3111	0.6124	0.2297	0.8012		1.095	1.1869	1.2397	1.134	0.9275	0.9502	0.9048	1.0194		93	100	100	100	95	83
	2201			azeloyltaurine	LC/MS neg	63226								0.962343	1.08	0.84	0.8	1.03		0.6633	0.7632	0.939	0.7446	0.9834	0.9807	0.9479	0.9453	0.9666	0.8567	0.7556	0.7662	0.7594	0.9875		1.5296	1.5726	1.5088	1.6364	1.429	1.5503	1.3076	1.472		100	100	100	100	100	100
	2204			linoleoyl ethanolamide	LC/MS neg	52608		HMDB0012252	5283446					1.01338	1.18	0.87	0.83	1.14		0.7061	0.7761	0.7585	0.6959	0.3175	0.9683	0.6392	0.9145	0.3276	0.6879	0.303	0.6091	0.6729	0.9653		1.1065	1.1299	1.0357	1.224	1.0979	1.1773	1.0185	1.1213		100	100	100	100	100	100
	2218			N-oleoylserine	LC/MS neg	57664			44190514					0.684097	0.7	0.66	0.78	0.83		0.1672	0.4944	0.0165	0.237	0.6165	0.9683	0.1832	0.7815	0.0296	0.3798	0.1598	0.5365	0.5466	0.9291		1.4821	1.3819	1.6233	1.1405	1.114	1.3408	0.8873	1.0139		100	100	100	100	100	100
	2219			N-stearoylserine*	LC/MS neg	61822								0.784837	0.79	0.77	0.68	0.7		0.0283	0.2954	0.0981	0.3843	0.5445	0.9683	0.4691	0.8715	0.092	0.5004	0.0365	0.4189	0.2661	0.8277		1.2953	1.3644	1.5208	1.2081	0.9475	1.0699	0.8252	1.0166		100	100	100	100	100	100
	2220			N-palmitoylserine	LC/MS neg	57659			6453686					0.790142	0.8	0.78	0.86	0.88		0.3782	0.6567	0.0709	0.3496	0.6236	0.9683	0.3635	0.846	0.0858	0.4911	0.3053	0.6091	0.7911	0.9875		1.2294	1.177	1.311	1.043	1.0237	1.1477	0.8998	0.9714		93	93	88	100	81	100
	2223		Inositol Metabolism	myo-inositol	LC/MS polar	1124	C00137	HMDB0000211	892					1.20303	1.36	1.05	0.78	1.01		0.2718	0.5869	0.0879	0.3753	0.1842	0.9683	0.0446	0.6452	0.7638	0.8181	0.0727	0.4763	0.8735	0.9953		0.9644	1.1317	0.9588	1.3047	0.9929	0.9699	1.0158	1.1602		100	100	100	100	100	100
	2224			chiro-inositol	LC/MS polar	37112	C19891	HMDB0240209						1.17132	6.58	0.51	0.63	8.13		0.1465	0.4767	0.6111	0.647	0.0584	0.9683	0.3378	0.8341	0.0725	0.4655	0.7237	0.7543	0.0273	0.6722		3.0843	2.5608	0.6756	4.446	4.1362	5.493	2.7794	3.6127		57	36	38	33	76	83
	2254		Phospholipid Metabolism	choline	LC/MS pos early	15506	C00114	HMDB0000097	305					1.12294	1.05	1.19	1.17	1.03		0.1616	0.4944	0.1159	0.4155	0.4459	0.9683	0.5746	0.9083	0.0828	0.4884	0.1081	0.507	0.6601	0.9603		0.9232	0.9336	0.9102	0.957	1.0263	0.9362	1.1165	1.0367		100	100	100	100	100	100
	2255			choline phosphate	LC/MS pos early	34396	C00588	HMDB0001565	1014					0.993309	1.17	0.84	0.85	1.18		0.9402	0.8342	0.8052	0.7035	0.1381	0.9683	0.3996	0.8592	0.1938	0.6009	0.2864	0.6091	0.2921	0.8358		1.0014	0.9959	0.9169	1.0749	1.0002	1.086	0.9145	0.9947		100	100	100	100	100	100
	2258			glycerophosphorylcholine (GPC)	LC/MS pos early	15990	C00670	HMDB0000086	71920					0.900509	0.96	0.84	0.93	1.07		0.926	0.8311	0.2368	0.4866	0.273	0.9683	0.952	0.9453	0.0915	0.5004	0.3713	0.6317	0.4979	0.9029		1.0815	1.0276	1.0466	1.0087	1.0278	1.1165	0.9391	0.9739		100	100	100	100	100	100
	2262			glycerophosphoethanolamine	LC/MS pos early	37455	C01233	HMDB0000114	123874					0.996659	1.09	0.92	1.02	1.21		0.1823	0.505	0.8839	0.7321	0.2141	0.9683	0.4576	0.8715	0.2966	0.6685	0.9431	0.807	0.0872	0.7608		1.0176	0.9624	0.9211	1.0036	1.0694	1.114	1.0249	1.0142		100	100	100	100	100	100
	2263			glycerophosphoserine*	LC/MS pos early	57404			3081457					1.04227	0.96	1.13	1.13	0.96		0.5315	0.7265	0.8051	0.7035	0.6537	0.9683	0.892	0.9404	0.6024	0.7634	0.4217	0.6415	0.9047	1		0.9794	0.9776	0.9983	0.9568	1.0226	0.9604	1.0847	1.0208		100	100	100	100	95	100
	2264			glycerophosphoinositol*	LC/MS neg	52307			167572					0.632664	0.76	0.5	0.61	0.92		0.0841	0.379	0.0026	0.1476	0.1101	0.9683	0.284	0.7934	0.0009	0.1139	0.0151	0.3361	0.9261	1		1.4744	1.3489	1.5355	1.1622	1.0583	1.4132	0.7033	0.9328		100	100	100	100	100	100
	2265			trimethylamine N-oxide	LC/MS pos early	40406	C01104	HMDB0000925	1145					1.00921	1.67	0.66	0.76	1.9		0.6235	0.7521	0.9449	0.7446	0.6047	0.9683	0.6937	0.9195	0.7362	0.8083	0.9839	0.8124	0.4994	0.9031		1.5534	1.4279	1.0701	1.7858	1.6931	2.0367	1.3495	1.5677		100	100	100	100	100	100
	2284		Phosphatidylcholine (PC)	1-myristoyl-2-palmitoyl-GPC (14:0/16:0)	LC/MS pos late	19258		HMDB0007869	129657					1.44431	1.94	1.11	0.86	1.5		0.817	0.8082	0.0983	0.3843	0.1217	0.9683	0.0345	0.6452	0.9328	0.8506	0.3164	0.6143	0.2302	0.8012		0.9149	1.0768	0.7323	1.4213	1.1594	1.0974	1.2215	1.3214		100	100	100	100	100	100
	2288			1-myristoyl-2-arachidonoyl-GPC (14:0/20:4)*	LC/MS pos late	53195		HMDB0007883	24778634					1.61082	1.64	1.58	0.81	0.84		0.146	0.4767	0.0024	0.1476	0.8289	0.9752	0.0244	0.6452	0.0271	0.3632	0.2094	0.559	0.3995	0.878		0.8297	1.1912	0.9036	1.4788	0.9749	0.7557	1.1941	1.3365		100	100	100	100	100	100
	2293			1-pentadecanoyl-2-linoleoyl-GPC (15:0/18:2)*	LC/MS pos late	52497		HMDB0007940	24778664					0.95897	1.05	0.86	0.81	0.99		0.3278	0.63	0.5455	0.6244	0.4183	0.9683	0.8893	0.9404	0.2913	0.6609	0.1833	0.5485	0.9079	1		1.0529	1.0872	1.0594	1.1151	0.9754	1.0464	0.9044	1.0097		100	100	100	100	100	100
	2294			1-pentadecanoyl-2-arachidonoyl-GPC (15:0/20:4)*	LC/MS pos late	53194		HMDB0007949	52922330					1.13236	0.85	1.65	1.05	0.54		0.0414	0.3179	0.2017	0.4716	0.0148	0.8182	0.3979	0.8592	0.0066	0.2608	0.7355	0.7561	0.0035	0.5766		0.9814	1.1788	1.273	1.0846	0.9139	0.6898	1.1379	1.1113		100	100	100	100	100	100
	2295			1-pentadecanoyl-2-docosahexaenoyl-GPC (15:0/22:6)*	LC/MS pos late	53197		HMDB0007958	52922342					0.913872	1.15	0.72	0.74	1.18		0.2453	0.5626	0.9071	0.7409	0.6622	0.9683	0.7103	0.9215	0.8099	0.8306	0.232	0.5832	0.6217	0.955		1.139	1.1205	1.0437	1.1974	1.0594	1.2344	0.8845	1.0409		100	100	100	100	100	100
	2299			1-palmitoyl-2-pentadecanoyl-GPC (16:0/15:0)*	LC/MS pos late	57757		HMDB0007967	24778680					1.14928	1.25	1.05	0.9	1.07		0.8924	0.8258	0.6324	0.661	0.7236	0.9752	0.5772	0.9083	0.9252	0.8505	0.714	0.75	0.8833	0.997		1.0028	1.0896	0.9683	1.211	1.0656	1.0373	1.094	1.1525		100	100	100	100	100	100
	2300			1,2-dipalmitoyl-GPC (16:0/16:0)	LC/MS pos late	19130	D03585	HMDB0000564	452110					0.942533	0.97	0.92	0.96	1.01		0.9097	0.8282	0.3098	0.5304	0.6434	0.9683	0.7073	0.9206	0.2692	0.6561	0.6656	0.7408	0.8143	0.9933		1.0754	1.0519	1.0685	1.0353	1.037	1.0822	0.9918	1.0136		100	100	100	100	100	100
	2301			1-palmitoyl-2-palmitoleoyl-GPC (16:0/16:1)*	LC/MS pos late	52470		HMDB0007969	6443788					1.07199	1.29	0.91	0.97	1.37		0.7853	0.7972	0.685	0.6741	0.2294	0.9683	0.281	0.7934	0.5448	0.7428	0.481	0.6676	0.3218	0.8478		1.1266	1.0872	0.9491	1.2254	1.247	1.3041	1.19	1.2077		100	100	100	100	100	100
	2303			1-palmitoyl-2-stearoyl-GPC (16:0/18:0)	LC/MS pos late	52616	C03889	HMDB0007970	24778686					1.06392	1.11	1.01	0.89	0.98		0.4114	0.6679	0.4743	0.6063	0.469	0.9683	0.3358	0.8341	0.9947	0.8588	0.2492	0.5865	0.9472	1		1.0138	1.0814	1.0241	1.1387	1.011	1.0035	1.0185	1.0786		100	100	100	100	100	100
	2305			1-palmitoyl-2-oleoyl-GPC (16:0/18:1)	LC/MS pos late	52461	C13875	HMDB0007972	6436017					0.925929	0.93	0.93	1	1		0.9779	0.8346	0.2557	0.499	0.9062	0.978	0.491	0.8715	0.3457	0.6963	0.913	0.8006	0.9518	1		1.0436	1.0056	1.0438	0.9673	1.0043	1.0433	0.9652	0.9663		93	93	88	100	100	100
	2308			1-palmitoyl-2-linoleoyl-GPC (16:0/18:2)	LC/MS pos late	42446		HMDB0007973	5287971					0.985342	1.01	0.96	0.92	0.97		0.1974	0.5234	0.6908	0.6765	0.5426	0.9683	0.8867	0.9402	0.4513	0.7196	0.1572	0.5365	0.6412	0.955		1.037	1.0578	1.0522	1.0634	1.0009	1.0217	0.9801	1.0218		100	100	100	100	100	100
	2309			1-palmitoyl-2-(hydroxylinoleoyl)-GPC (16:0/18:2(OH))*	LC/MS pos late	57415								2.3885	5.63	1.26	0.64	2.86		0.8011	0.8012	0.0811	0.3595	0.3067	0.9683	0.0659	0.666	0.571	0.7539	0.3395	0.6247	0.6021	0.9458		2.4592	4.2231	1.274	7.1722	4.1099	3.6444	4.5754	5.8738		100	100	100	100	100	100
	2311			1-palmitoyl-2-gamma-linolenoyl-GPC (16:0/18:3n6)*	LC/MS pos late	54812		HMDB0007974	24778699					1.74502	1.45	2.07	1.28	0.89		0.9689	0.8346	0.0249	0.2556	0.735	0.9752	0.1862	0.7815	0.0517	0.438	0.8221	0.7817	0.8	0.9909		0.5267	0.6818	0.5561	0.8076	0.764	0.4974	1.0307	0.9191		21	43	25	67	48	17
	2315			1-palmitoyl-2-dihomo-linolenoyl-GPC (16:0/20:3n3 or 6)*	LC/MS pos late	52454								0.977586	0.97	0.98	0.93	0.92		0.2671	0.5828	0.792	0.6994	0.9137	0.978	0.9169	0.9453	0.7802	0.8226	0.3599	0.6317	0.4986	0.9029		1.0529	1.082	1.0963	1.0676	1.0003	1.0096	0.991	1.0293		100	100	100	100	100	100
	2319			1-palmitoyl-2-arachidonoyl-GPC (16:0/20:4n6)	LC/MS pos late	52462	C05208	HMDB0007982	10747814					1.0702	0.93	1.25	1.02	0.76		0.0577	0.3352	0.1833	0.4575	0.0131	0.8182	0.3997	0.8592	0.0053	0.2463	0.6224	0.7295	0.0042	0.5766		0.9616	1.0533	1.0901	1.0165	0.9374	0.8331	1.0417	1.0291		100	100	100	100	100	100
	2320			1-palmitoyl-2-eicosapentaenoyl-GPC (16:0/20:5)*	LC/MS pos late	52463		HMDB0007984	24778723					1.29029	1.47	1.14	0.95	1.22		0.7685	0.7914	0.051	0.3184	0.4485	0.9683	0.07	0.666	0.3511	0.6963	0.7264	0.7545	0.4804	0.8977		0.947	1.0538	0.8524	1.2552	1.1152	1.0417	1.1887	1.2219		100	100	100	100	100	100
	2325			1-palmitoyl-2-docosahexaenoyl-GPC (16:0/22:6)	LC/MS pos late	52610		HMDB0007991	6441886					0.943814	1	0.89	0.92	1.03		0.4949	0.7176	0.7753	0.6979	0.7473	0.9752	0.9803	0.9453	0.6489	0.7814	0.4519	0.6544	0.8078	0.9933		1.0928	1.0764	1.0786	1.0741	1.0478	1.1069	0.9886	1.0314		100	100	100	100	100	100
	2332			1-palmitoleoyl-2-linolenoyl-GPC (16:1/18:3)*	LC/MS pos late	53180		HMDB0008008	52922452					1.2708	2.06	0.51	0.26	1.04		0.1441	0.4728	0.9788	0.7485	0.1684	0.9683	0.3605	0.846	0.2894	0.6594	0.0368	0.4189	0.9532	1		1.1407	1.7128	1.12	2.3055	0.8776	1.1614	0.5938	1.4496		71	71	75	67	62	67
	2338			1-margaroyl-2-oleoyl-GPC (17:0/18:1)*	LC/MS pos late	52499								0.848312	0.79	0.91	1.15	0.99		0.6579	0.7632	0.1792	0.4558	0.4922	0.9683	0.175	0.7795	0.6141	0.7652	0.3982	0.6317	0.869	0.9953		1.1194	1.0027	1.1227	0.8827	1.0663	1.1161	1.0165	0.9496		100	100	100	100	100	100
	2339			1-margaroyl-2-linoleoyl-GPC (17:0/18:2)*	LC/MS pos late	52500			52922491					0.790073	0.83	0.75	1.02	1.12		0.4605	0.6967	0.0327	0.2894	0.6041	0.9683	0.2595	0.7909	0.0469	0.4259	0.868	0.791	0.4003	0.878		1.1504	0.9916	1.084	0.8992	1.0677	1.2169	0.9186	0.9089		100	100	100	100	100	100
	2340			1-margaroyl-2-arachidonoyl-GPC (17:0/20:4)*	LC/MS pos late	53193								1.1338	0.86	1.59	1.1	0.59		0.1363	0.4656	0.184	0.4581	0.0537	0.9683	0.6674	0.9186	0.017	0.3221	0.7234	0.7543	0.0241	0.6722		1.0045	1.1737	1.2614	1.086	0.9697	0.7476	1.1919	1.1389		100	100	100	100	100	100
	2344			1-stearoyl-2-oleoyl-GPC (18:0/18:1)	LC/MS pos late	52438		HMDB0008038	24778825					1.02819	1	1.05	1	0.95		0.7158	0.7761	0.7522	0.6953	0.9349	0.978	0.7898	0.9331	0.8605	0.8417	0.7382	0.7576	0.8496	0.9953		1.0466	1.0735	1.0714	1.0756	1.0492	1.0218	1.0767	1.0761		100	100	100	100	100	100
	2347			1-stearoyl-2-linoleoyl-GPC (18:0/18:2)*	LC/MS pos late	52452		HMDB0008039	6441487					1.03905	1.08	0.99	0.86	0.95		0.0489	0.3303	0.4974	0.6111	0.3774	0.9683	0.2967	0.7984	0.8765	0.8441	0.0347	0.4178	0.4445	0.8925		1.0039	1.0755	1.0319	1.1191	0.9715	0.9759	0.9672	1.0431		100	100	100	100	100	100
	2350			phosphatidylcholine (18:0/20:2, 20:0/18:2)*	LC/MS pos late	53192		HMDB0008045 HMDB0008143						0.91897	0.93	0.91	0.96	0.98		0.798	0.8012	0.3736	0.5644	0.6604	0.9683	0.7602	0.9257	0.3204	0.6801	0.6024	0.7229	0.9018	1		1.1033	1.0736	1.1135	1.0336	1.0436	1.0931	0.9941	1.0139		100	100	100	100	100	100
	2351			1-stearoyl-2-dihomo-linolenoyl-GPC (18:0/20:3n3 or 6)*	LC/MS pos late	52629		HMDB0008047						1.00189	0.92	1.1	1.04	0.87		0.5922	0.743	0.9351	0.7446	0.4857	0.9683	0.6786	0.9186	0.559	0.747	0.9028	0.7962	0.4093	0.878		1.0034	1.031	1.0754	0.9866	0.9777	0.9314	1.024	1.0053		100	100	100	100	100	100
	2352			1-stearoyl-2-meadoyl-GPC (18:0/20:3n9)*	LC/MS pos late	52738		HMDB0008046	24778855					1.0801	0.81	1.46	1.28	0.71		0.8853	0.8253	0.8266	0.7093	0.3188	0.9683	0.5989	0.9145	0.3618	0.6963	0.52	0.6821	0.4429	0.8925		0.9064	0.959	1.0598	0.8583	0.9265	0.7531	1.0998	0.979		71	64	75	50	76	67
	2355			1-stearoyl-2-arachidonoyl-GPC (18:0/20:4)	LC/MS pos late	42450		HMDB0008048	16219824					1.13239	0.95	1.39	1	0.69		0.0121	0.2395	0.0336	0.2894	0.0091	0.8182	0.7092	0.9215	0.0007	0.1139	0.9291	0.8031	0.0009	0.5551		0.9162	1.0605	1.0851	1.0359	0.8932	0.7473	1.0391	1.0375		100	100	100	100	100	100
	2358			1-stearoyl-2-adrenoyl-GPC (18:0/22:4)*	LC/MS pos late	55061		HMDB0008054	24778868					0.917684	0.62	1.43	1.33	0.58		0.3777	0.6567	0.7528	0.6953	0.0089	0.8182	0.0453	0.6452	0.073	0.4655	0.1648	0.5365	0.0191	0.6553		1.0399	1.0676	1.3158	0.8194	0.9266	0.7641	1.0891	0.9543		100	100	100	100	100	100
	2359			1-stearoyl-2-docosapentaenoyl-GPC (18:0/22:5n3)*	LC/MS pos late	52699		HMDB0008056	24778873					0.897192	0.85	0.95	1.03	0.91		0.6634	0.7632	0.1699	0.455	0.6749	0.9695	0.2291	0.785	0.467	0.7202	0.9905	0.8124	0.5669	0.9343		1.0826	1.0458	1.1326	0.959	1.0081	1.0327	0.9835	0.9713		100	100	100	100	100	100
	2360			1-stearoyl-2-docosapentaenoyl-GPC (18:0/22:5n6)*	LC/MS pos late	52700		HMDB0008055	24778871					0.819121	0.48	1.7	1.38	0.39		0.3447	0.6446	0.3569	0.5591	0.0016	0.8182	0.0061	0.6452	0.0682	0.4655	0.0707	0.4717	0.0058	0.5766		1.0941	1.1646	1.576	0.7532	0.8256	0.6121	1.0392	0.8962		100	100	100	100	100	100
	2361			1-stearoyl-2-docosahexaenoyl-GPC (18:0/22:6)	LC/MS pos late	52611		HMDB0008057	24778876					1.03426	1.22	0.88	0.87	1.2		0.9812	0.8346	0.3921	0.5708	0.3819	0.9683	0.248	0.7881	0.9887	0.8587	0.4996	0.6731	0.5667	0.9343		1.0536	1.0603	0.9557	1.1648	1.0831	1.1516	1.0146	1.0897		93	93	88	100	100	100
	2380			1-oleoyl-2-docosahexaenoyl-GPC (18:1/22:6)*	LC/MS pos late	52697		HMDB0008123	24778955					0.895623	1	0.79	0.76	0.97		0.1199	0.4383	0.7369	0.6927	0.602	0.9683	0.9005	0.9407	0.5208	0.7385	0.1209	0.507	0.4773	0.8977		1.1468	1.1669	1.1658	1.168	1.0069	1.1278	0.8861	1.0271		100	100	100	100	100	100
	2381			1,2-dilinoleoyl-GPC (18:2/18:2)	LC/MS pos late	52603		HMDB0008138	5288075					1.00216	1.16	0.87	0.85	1.13		0.9512	0.8342	0.9221	0.7422	0.2578	0.9683	0.4076	0.8592	0.4351	0.7101	0.4194	0.6396	0.4214	0.8825		1.0643	1.0759	0.9979	1.1539	1.055	1.1308	0.9792	1.0666		100	100	100	100	100	100
	2382			1-linoleoyl-2-linolenoyl-GPC (18:2/18:3)*	LC/MS pos late	53176		HMDB0008141	52922731					1.30282	1.55	0.91	0.37	0.62		0.1026	0.4043	0.4782	0.6063	0.2308	0.9683	0.2026	0.785	0.7078	0.7952	0.0371	0.4189	0.7598	0.9875		1.1122	1.7448	1.3706	2.119	0.8164	0.8539	0.779	1.449		79	71	75	67	71	83
	2387			1-linoleoyl-2-arachidonoyl-GPC (18:2/20:4n6)*	LC/MS pos late	52710	C05208	HMDB0008147	24778979					1.15645	1.06	1.27	0.94	0.79		0.1823	0.505	0.1208	0.4204	0.4136	0.9683	0.6107	0.9145	0.0787	0.4774	0.6908	0.7438	0.1514	0.7608		0.9594	1.1087	1.0741	1.1434	0.9602	0.8448	1.0756	1.1095		100	100	100	100	100	100
	2391			1-linoleoyl-2-docosahexaenoyl-GPC (18:2/22:6)*	LC/MS pos late	53199		HMDB0008156	24778983					1.0893	1.09	1.09	0.84	0.85		0.1431	0.4728	0.306	0.5288	0.9856	0.9807	0.4828	0.8715	0.4489	0.7196	0.2629	0.5953	0.3272	0.8512		0.9899	1.1199	1.0703	1.1695	0.9482	0.9095	0.987	1.0783		100	100	100	100	100	100
	2396			1-arachidoyl-2-arachidonoyl-GPC (20:0/20:4)*	LC/MS pos late	55062		HMDB0008279	24779048					1.12166	0.84	1.62	1.1	0.56		0.2608	0.575	0.3228	0.537	0.1725	0.9683	0.7945	0.9331	0.0814	0.4858	0.8519	0.7865	0.0982	0.7608		1.085	1.2743	1.3869	1.1617	1.0276	0.783	1.2722	1.217		100	100	100	100	100	100
	2426		Phosphatidylethanolamine (PE)	1,2-dipalmitoyl-GPE (16:0/16:0)*	LC/MS pos late	57341		HMDB0008923	445468					0.934255	1.07	0.81	0.83	1.08		0.9411	0.8342	0.4258	0.5906	0.2654	0.9683	0.8277	0.9333	0.1555	0.5888	0.3717	0.6317	0.4825	0.8978		0.832	0.8248	0.7986	0.8509	0.7845	0.8653	0.7037	0.7773		64	43	50	33	43	83
	2427			1-palmitoyl-2-palmitoleoyl-GPE (16:0/16:1)*	LC/MS pos late	52471		HMDB0008924	52924925					0.923216	0.82	0.98	2.09	1.73		0.1847	0.5077	0.4361	0.5941	0.9736	0.9807	0.6158	0.9145	0.5419	0.7421	0.3286	0.6183	0.3583	0.8621		0.9403	0.6249	0.6877	0.562	1.1835	1.1928	1.1741	0.8681		64	57	63	50	57	67
	2430			1-palmitoyl-2-oleoyl-GPE (16:0/18:1)	LC/MS pos late	19263		HMDB0005320	5283496					0.965408	0.82	1.12	1.29	0.94		0.6919	0.772	0.6604	0.6683	0.6959	0.9717	0.578	0.9083	0.9709	0.8569	0.5555	0.6942	0.9971	1		1.1072	1.0379	1.1405	0.9354	1.1381	1.0739	1.2024	1.0689		100	100	100	100	100	100
	2432			1-palmitoyl-2-linoleoyl-GPE (16:0/18:2)	LC/MS pos late	42449		HMDB0005322	9546747					0.874566	0.93	0.82	0.92	1.05		0.9995	0.8382	0.2981	0.5224	0.7926	0.9752	0.5986	0.9145	0.3286	0.6883	0.8439	0.7865	0.8596	0.9953		1.2094	1.1389	1.1777	1.1001	1.1281	1.241	1.0152	1.0577		100	100	100	100	100	100
	2438			1-palmitoyl-2-arachidonoyl-GPE (16:0/20:4)*	LC/MS pos late	52464	C05210	HMDB0005323	9546800					0.948057	0.75	1.23	1.16	0.71		0.3556	0.6512	0.6667	0.6683	0.0899	0.9683	0.1527	0.7463	0.3314	0.693	0.5466	0.6901	0.0811	0.7608		1.1243	1.1496	1.3144	0.9847	1.0406	0.9342	1.1471	1.0659		100	100	100	100	100	100
	2439			1-palmitoyl-2-eicosapentaenoyl-GPE (16:0/20:5)*	LC/MS pos late	53190		HMDB0008939	52924919					1.20356	1.44	1.01	0.85	1.21		0.9662	0.8346	0.5185	0.6196	0.3096	0.9683	0.2667	0.7934	0.7777	0.8226	0.4633	0.6607	0.476	0.8977		1.0503	1.1584	0.9489	1.368	1.1559	1.1517	1.1602	1.2641		86	79	75	83	90	100
	2440			1-palmitoyl-2-docosahexaenoyl-GPE (16:0/22:6)*	LC/MS pos late	52465		HMDB0008946	9546799					0.871439	0.79	0.97	0.98	0.8		0.3115	0.6205	0.567	0.6291	0.609	0.9683	0.4679	0.8715	0.9633	0.8549	0.7036	0.7462	0.3078	0.8407		1.2671	1.2624	1.4085	1.1163	1.1089	1.1258	1.092	1.1042		100	100	100	100	100	100
	2447			1-stearoyl-2-oleoyl-GPE (18:0/18:1)	LC/MS pos late	42448		HMDB0008993	9546742					1.31122	1.12	1.53	1.2	0.88		0.6113	0.7475	0.3565	0.5591	0.9175	0.978	0.4904	0.8715	0.5375	0.7407	0.7611	0.7662	0.6814	0.9684		0.9768	1.1034	1.0404	1.1665	1.1542	0.9131	1.3952	1.2808		93	93	88	100	100	100
	2451			1-stearoyl-2-linoleoyl-GPE (18:0/18:2)*	LC/MS pos late	52446		HMDB0008994	9546749					1.10544	1.03	1.2	0.92	0.8		0.5751	0.743	0.7209	0.6874	0.8507	0.9757	0.9096	0.9452	0.6826	0.787	0.7794	0.7729	0.6155	0.955		1.0935	1.2377	1.2182	1.2572	1.0646	0.9687	1.1604	1.2088		100	100	100	100	100	100
	2456			1-stearoyl-2-dihomo-linolenoyl-GPE (18:0/20:3n3 or 6)*	LC/MS pos late	57336		HMDB0009002	52924903					0.983999	0.75	1.33	1.2	0.68		0.9099	0.8282	0.8458	0.7191	0.353	0.9683	0.4506	0.8701	0.5794	0.7552	0.5387	0.6854	0.4835	0.8986		1.1374	1.1868	1.3561	1.0175	1.0698	0.9188	1.2208	1.1192		100	100	100	100	100	100
	2460			1-stearoyl-2-arachidonoyl-GPE (18:0/20:4)	LC/MS pos late	52447	C05210	HMDB0009003	5289133					1.02604	0.78	1.44	1.08	0.59		0.0788	0.366	0.6425	0.6646	0.0418	0.9368	0.2756	0.7934	0.061	0.4636	0.8202	0.7817	0.0127	0.6553		1.1135	1.2519	1.4047	1.099	1.0042	0.8223	1.186	1.1425		100	100	100	100	100	100
	2461			1-stearoyl-2-adrenoyl-GPE (18:0/22:4)*	LC/MS pos late	57339		HMDB0009009	52924901					0.932946	0.45	2.02	2.01	0.45		0.937	0.8342	0.8789	0.7313	0.1086	0.9683	0.3226	0.826	0.1855	0.598	0.2473	0.5865	0.2543	0.8246		0.774	0.7747	1.0696	0.4797	0.7214	0.4783	0.9644	0.7221		50	64	63	67	62	33
	2462			1-stearoyl-2-docosapentaenoyl-GPE (18:0/22:5n3)*	LC/MS pos late	57337		HMDB0009011	53479612					0.940066	0.73	1.25	1.14	0.67		0.5892	0.743	0.6578	0.6683	0.421	0.9683	0.4034	0.8592	0.7842	0.8227	0.841	0.7865	0.3682	0.8621		0.9961	1.0361	1.1956	0.8767	0.8963	0.7966	0.9961	0.9364		86	79	88	67	71	83
	2463			1-stearoyl-2-docosapentaenoyl-GPE (18:0/22:5n6)*	LC/MS pos late	57338		HMDB0009010	53479611					0.866313	0.49	2.02	1.32	0.32		0.0859	0.3822	0.7531	0.6953	0.0181	0.8525	0.0686	0.666	0.1125	0.5212	0.5922	0.717	0.0074	0.6167		1.1886	1.342	1.7968	0.8872	0.8763	0.5805	1.1721	1.0297		93	100	100	100	86	83
	2464			1-stearoyl-2-docosahexaenoyl-GPE (18:0/22:6)*	LC/MS pos late	52466		HMDB0009012	9546798					1.08045	0.93	1.28	0.98	0.72		0.2322	0.5512	0.4969	0.6111	0.4085	0.9683	0.9203	0.9453	0.2614	0.653	0.7772	0.7726	0.1776	0.7608		1.0392	1.1713	1.2109	1.1316	0.9908	0.8675	1.1141	1.1228		100	100	100	100	100	100
	2466			1-oleoyl-2-linoleoyl-GPE (18:1/18:2)*	LC/MS pos late	52687		HMDB0005349	9546753					1.06023	1.16	0.94	0.68	0.84		0.7706	0.792	0.8799	0.7313	0.6707	0.9683	0.8539	0.9338	0.6657	0.7834	0.5913	0.717	0.9283	1		1.036	1.2182	1.1275	1.3089	0.9162	0.9446	0.8878	1.0984		93	93	88	100	100	100
	2469			1-oleoyl-2-arachidonoyl-GPE (18:1/20:4)*	LC/MS pos late	55041		HMDB0009069	348281223					0.865849	0.73	1.08	0.95	0.64		0.8008	0.8012	0.495	0.6111	0.8743	0.9757	0.5726	0.9083	0.6932	0.7877	0.9437	0.807	0.783	0.9875		1.1502	1.212	1.4029	1.0211	0.9341	0.8974	0.9708	0.9959		100	93	100	83	90	100
	2473			1-oleoyl-2-docosahexaenoyl-GPE (18:1/22:6)*	LC/MS pos late	53209		HMDB0009078	52922113					0.828844	0.89	0.75	0.64	0.76		0.3307	0.6307	0.4428	0.5945	0.6394	0.9683	0.8396	0.9333	0.3555	0.6963	0.2815	0.6091	0.7321	0.9875		1.2252	1.3139	1.3911	1.2367	0.9268	1.0593	0.7942	1.0155		86	86	88	83	76	83
	2474			1,2-dilinoleoyl-GPE (18:2/18:2)*	LC/MS pos late	53174		HMDB0009093	9546812					1.00992	1.2	0.69	0.34	0.59		0.0647	0.3451	0.9233	0.7426	0.2382	0.9683	0.3899	0.8592	0.4133	0.7092	0.026	0.4109	0.6358	0.955		1.1194	1.549	1.4097	1.6884	0.7009	0.8292	0.5727	1.1305		71	71	63	83	67	83
	2476			1-linoleoyl-2-arachidonoyl-GPE (18:2/20:4)*	LC/MS pos late	53189		HMDB0009102	348279332					0.774926	0.68	0.94	0.77	0.56		0.2761	0.592	0.2863	0.5113	0.4432	0.9683	0.2211	0.785	0.8187	0.8314	0.805	0.7794	0.2154	0.7921		1.2236	1.3211	1.5715	1.0707	0.8507	0.8758	0.8256	0.9482		93	86	100	67	81	83
	2527		Phosphatidylserine (PS)	1-stearoyl-2-oleoyl-GPS (18:0/18:1)	LC/MS pos late	19265		HMDB0010163	9547087					1.37286	1.5	1.22	0.68	0.83		0.3636	0.6551	0.7449	0.6946	0.9847	0.9807	0.8171	0.9333	0.8183	0.8314	0.4854	0.67	0.5493	0.9291		0.9596	1.308	1.0467	1.5693	0.969	0.8725	1.0655	1.3174		100	100	100	100	90	100
	2556		Phosphatidylinositol (PI)	1-palmitoyl-2-oleoyl-GPI (16:0/18:1)*	LC/MS pos late	52669		HMDB0009783	71296232					0.990195	1	0.98	1.14	1.16		0.5959	0.743	0.6629	0.6683	0.5592	0.9683	0.9204	0.9453	0.4455	0.7191	0.9676	0.811	0.4557	0.8977		1.0301	0.9532	0.954	0.9524	1.0969	1.1062	1.0876	1.02		100	100	100	100	100	100
	2558			1-palmitoyl-2-linoleoyl-GPI (16:0/18:2)	LC/MS pos late	52450		HMDB0009784	46891795					0.941807	1	0.89	0.94	1.06		0.6353	0.7553	0.7767	0.6979	0.757	0.9752	0.9861	0.9453	0.6567	0.7833	0.5572	0.6942	0.9116	1		1.0448	1.0161	1.016	1.0163	1.0127	1.0737	0.9518	0.984		100	100	100	100	100	100
	2561			1-palmitoyl-2-arachidonoyl-GPI (16:0/20:4)*	LC/MS pos late	52467		HMDB0009789						1.1083	1.09	1.12	0.93	0.9		0.2381	0.5569	0.3765	0.5653	0.8665	0.9757	0.6288	0.9145	0.4297	0.7092	0.4442	0.6493	0.3643	0.8621		0.916	1.0081	0.9627	1.0534	0.9231	0.8693	0.977	1.0152		100	100	100	100	100	100
	2564			1-stearoyl-2-oleoyl-GPI (18:0/18:1)*	LC/MS pos late	52726		HMDB0240667						0.994226	1.07	0.93	0.99	1.14		0.7069	0.7761	0.7676	0.6973	0.3744	0.9683	0.6885	0.9195	0.3753	0.6972	0.6982	0.7459	0.3968	0.878		1.1084	1.0716	1.0359	1.1073	1.1388	1.1809	1.0967	1.102		100	100	100	100	100	100
	2565			1-stearoyl-2-linoleoyl-GPI (18:0/18:2)	LC/MS pos late	52468		HMDB0009809						0.956353	1.07	0.84	0.75	0.95		0.1328	0.4575	0.5336	0.6232	0.2505	0.9683	0.7189	0.9215	0.1867	0.598	0.0504	0.4717	0.8042	0.9922		1.1089	1.1759	1.1377	1.2141	0.9935	1.0802	0.9069	1.0605		100	100	100	100	100	100
	2578			1-stearoyl-2-arachidonoyl-GPI (18:0/20:4)	LC/MS pos late	52449		HMDB0009815						1.05737	1	1.13	0.86	0.76		0.0049	0.1975	0.3989	0.5778	0.4374	0.9683	0.9636	0.9453	0.2274	0.6313	0.102	0.507	0.0155	0.6553		0.9849	1.1204	1.1194	1.1214	0.9058	0.8503	0.9613	1.0414		100	100	100	100	100	100
	2580			1-stearoyl-2-dihomo-linolenoyl-GPI (18:0/20:3n3 or 6)*	LC/MS pos late	54984		HMDB0009814						0.936337	1.16	0.73	0.68	1.08		0.2109	0.5266	0.4542	0.597	0.0548	0.9683	0.4127	0.8592	0.0473	0.4259	0.0199	0.3806	0.6334	0.955		1.0854	1.1273	1.0449	1.2098	0.9743	1.1258	0.8229	1.0163		100	100	100	100	95	100
	2584			1-stearoyl-2-docosahexaenoyl-GPI (18:0/22:6)*	LC/MS pos late	52668		HMDB0009821	52927465					0.894381	1.24	0.64	0.7	1.36		0.5733	0.743	0.8767	0.7311	0.043	0.9368	0.1997	0.785	0.0992	0.5115	0.0533	0.4717	0.3094	0.8421		1.0945	1.038	0.9268	1.1492	1.0354	1.2622	0.8086	0.9789		100	100	100	100	100	100
	2604		Lysophospholipid	1-palmitoyl-GPA (16:0)	LC/MS pos late	34428	C04036	HMDB00327	6419701					1.20342	1.09	1.4	0.75	0.59		0.0052	0.1975	0.3544	0.5576	0.4048	0.9683	0.9494	0.9453	0.1904	0.5994	0.1147	0.507	0.0147	0.6553		1.0697	1.4092	1.3486	1.4698	0.9479	0.7909	1.1049	1.2873		93	100	100	100	95	83
	2607			1-stearoyl-GPA (18:0)	LC/MS neg	36810		HMDB0062319	89567					0.719413	0.86	0.58	0.67	1.01		0.4634	0.697	0.1864	0.4609	0.4173	0.9683	0.7249	0.9215	0.1132	0.5212	0.2496	0.5865	0.9578	1		0.9056	0.8416	0.9028	0.7805	0.7155	0.9085	0.5225	0.6515		71	71	75	67	48	67
	2608			1-oleoyl-GPA (18:1)	LC/MS pos late	36812			5497152					1.20043	1.24	1.15	0.76	0.82		0.2235	0.5406	0.5667	0.6291	0.6522	0.9683	0.493	0.8715	0.9265	0.8506	0.2125	0.5627	0.6012	0.9458		0.8327	1.0237	0.9139	1.1336	0.8086	0.7515	0.8656	0.9996		71	64	63	67	52	83
	2609			1-linoleoyl-GPA (18:2)*	LC/MS polar	52690		HMDB0007856						0.951463	1.02	0.88	0.76	0.88		0.2127	0.5285	0.528	0.6232	0.6958	0.9717	0.8712	0.9358	0.4444	0.7182	0.2206	0.5736	0.5603	0.9326		1.3021	1.3949	1.3831	1.4066	1.1461	1.2211	1.0712	1.2389		93	93	100	83	95	83
	2617			1-myristoyl-GPC (14:0)	LC/MS pos late	45453	C04230	HMDB0010379	460604					1.4044	1.83	1.1	0.83	1.38		0.8608	0.8172	0.0526	0.3184	0.0799	0.9683	0.0153	0.6452	0.8792	0.8441	0.2296	0.5801	0.1922	0.7682		0.9493	1.1296	0.7987	1.4604	1.1529	1.0998	1.2059	1.3332		100	100	100	100	100	100
	2618			2-myristoyl-GPC (14:0)*	LC/MS pos late	35626		HMDB0010379	460604					1.30077	1.67	1.04	0.9	1.44		0.684	0.7684	0.1417	0.433	0.1249	0.9683	0.0469	0.6452	0.9588	0.8533	0.3884	0.6317	0.192	0.7682		0.9429	1.0326	0.7732	1.2919	1.1368	1.1125	1.1612	1.2265		100	100	100	100	100	100
	2621			1-pentadecanoyl-GPC (15:0)*	LC/MS pos late	37418		HMDB0010381	24779458					1.10272	1.1	1.11	0.91	0.91		0.3755	0.6567	0.6194	0.6525	0.8664	0.9757	0.8252	0.9333	0.6182	0.7658	0.5883	0.7147	0.4788	0.8977		0.956	1.0521	1.0018	1.1023	0.9581	0.9101	1.0062	1.0542		100	100	100	100	100	100
	2622			1-palmitoyl-GPC (16:0)	LC/MS pos late	33955	C04102	HMDB0010382	86554					0.993541	1.01	0.97	0.96	1		0.7112	0.7761	0.789	0.6989	0.6376	0.9683	0.8911	0.9404	0.58	0.7552	0.5288	0.6849	0.9459	1		1.0373	1.0431	1.0359	1.0503	1.0247	1.0386	1.0108	1.0306		100	100	100	100	100	100
	2623			2-palmitoyl-GPC (16:0)*	LC/MS neg	35253		HMDB0061702	15061532					0.869338	0.88	0.86	0.98	1		0.9367	0.8342	0.2578	0.5004	0.5883	0.9683	0.6873	0.9195	0.2118	0.6159	0.7285	0.7545	0.6769	0.9673		1.0906	1.0258	1.0923	0.9594	1.0128	1.089	0.9367	0.9481		100	100	100	100	100	100
	2624			1-palmitoleoyl-GPC (16:1)*	LC/MS pos late	33230		HMDB0010383	24779461					0.967411	1.21	0.78	0.84	1.31		0.9744	0.8346	0.8127	0.7055	0.0414	0.9368	0.2146	0.785	0.0857	0.4911	0.1262	0.507	0.1574	0.7608		1.1108	1.0651	0.9619	1.1682	1.1203	1.2596	0.981	1.0746		100	100	100	100	100	100
	2625			2-palmitoleoyl-GPC (16:1)*	LC/MS neg	47118		HMDB10383	122164832					0.756141	0.97	0.61	0.93	1.49		0.3502	0.6491	0.2802	0.5113	0.1454	0.9683	0.793	0.9331	0.061	0.4636	0.6855	0.7431	0.1115	0.7608		1.0748	0.8519	0.8629	0.8409	1.0356	1.2867	0.7844	0.8127		79	64	63	67	81	100
	2633			1-stearoyl-GPC (18:0)	LC/MS pos late	33961		HMDB0010384	497300					1.03243	1.05	1.01	0.9	0.93		0.1552	0.4898	0.6662	0.6683	0.602	0.9683	0.5233	0.8891	0.9457	0.8516	0.1469	0.523	0.5373	0.922		1.0638	1.1286	1.1004	1.1567	1.0334	1.0271	1.0398	1.0983		100	100	100	100	100	100
	2635			1-oleoyl-GPC (18:1)	LC/MS pos late	48258	C03916	HMDB0002815	16081932					0.895354	1	0.79	0.85	1.08		0.5931	0.743	0.1519	0.4434	0.0944	0.9683	0.8645	0.9345	0.0228	0.3456	0.0993	0.507	0.4325	0.8882		1.0999	1.0609	1.0583	1.0635	1.0238	1.1415	0.9061	0.9848		100	100	100	100	100	100
	2636			2-oleoyl-GPC (18:1)*	LC/MS neg	48259		HMDB0061701	24779494					0.730519	0.79	0.67	0.84	0.98		0.7662	0.791	0.0763	0.3522	0.2707	0.9683	0.6361	0.9145	0.0341	0.4065	0.2946	0.6091	0.5856	0.9375		1.3808	1.2441	1.3914	1.0967	1.1455	1.3702	0.9208	1.0087		100	100	100	100	100	100
	2638			1-linoleoyl-GPC (18:2)	LC/MS pos late	34419	C04100	HMDB0010386	11988421					0.972768	1.14	0.83	0.82	1.13		0.6212	0.7521	0.5242	0.6202	0.0228	0.8525	0.249	0.7881	0.0297	0.3798	0.0377	0.4189	0.2128	0.7873		1.0943	1.0987	1.029	1.1685	1.06	1.1596	0.9604	1.0645		100	100	100	100	100	100
	2639			2-linoleoyl-GPC (18:2)*	LC/MS neg	35257		HMDB0061700	71768169					0.837803	1	0.69	0.77	1.11		0.6345	0.7553	0.1198	0.4204	0.0928	0.9683	0.9286	0.9453	0.0179	0.3221	0.1068	0.507	0.4066	0.878		1.238	1.1726	1.1746	1.1706	1.1027	1.3015	0.9038	1.0372		100	100	100	100	100	100
	2640			1-linolenoyl-GPC (18:3)*	LC/MS pos late	45951	C04100	HMDB0010388						1.12741	1.45	0.84	0.65	1.12		0.5481	0.7336	0.526	0.6216	0.1216	0.9683	0.1442	0.7398	0.4813	0.7273	0.1092	0.507	0.5138	0.9143		0.9999	1.1531	0.9414	1.3648	0.9742	1.0584	0.8899	1.1273		100	100	100	100	100	100
	2643			1-nonadecanoyl-GPC (19:0)	LC/MS pos late	47087								1.03361	1.22	0.86	0.75	1.06		0.2071	0.5235	0.7214	0.6874	0.38	0.9683	0.408	0.8592	0.6934	0.7877	0.1123	0.507	0.7912	0.9875		1.1099	1.1948	1.0787	1.311	1.0623	1.1411	0.9835	1.1472		100	100	100	100	100	100
	2644			1-nonadecenoyl-GPC (19:1)*	LC/MS pos late	62429								0.874646	0.91	0.84	0.82	0.89		0.1756	0.4958	0.3901	0.5708	0.5933	0.9683	0.8251	0.9333	0.298	0.6701	0.1587	0.5365	0.5743	0.9351		1.0937	1.1035	1.1579	1.0491	0.9468	1.0295	0.8641	0.9566		100	100	100	100	100	100
	2646			1-arachidoyl-GPC (20:0)	LC/MS pos late	45456	C04230	HMDB0010390	24779473					0.925388	1.1	0.77	0.8	1.13		0.8693	0.8228	0.5627	0.6291	0.2246	0.9683	0.6639	0.9186	0.1811	0.5916	0.3001	0.6091	0.477	0.8977		1.1714	1.1525	1.0998	1.2051	1.1029	1.2429	0.9628	1.084		100	100	100	100	100	100
	2649			1-eicosenoyl-GPC (20:1)*	LC/MS pos late	44560		HMDB0010391	52924051					0.774597	0.92	0.64	0.74	1.07		0.5001	0.7176	0.0975	0.3843	0.1687	0.9683	0.842	0.9333	0.026	0.3632	0.1269	0.507	0.6293	0.955		1.2857	1.1907	1.2393	1.1422	1.0909	1.3321	0.8496	0.9959		100	100	100	100	100	100
	2651			1-dihomo-linoleoyl-GPC (20:2)*	LC/MS pos late	33871		HMDB0010392						0.832147	0.93	0.74	0.81	1.03		0.354	0.6503	0.0609	0.335	0.1442	0.9683	0.7663	0.9263	0.0147	0.3056	0.077	0.4812	0.711	0.98		1.1659	1.1087	1.1475	1.0699	1.0274	1.1842	0.8705	0.9702		100	100	100	100	100	100
	2652			1-dihomo-linolenoyl-GPC (20:3n3 or 6)*	LC/MS pos late	33821		HMDB0010394	52924055					0.871917	0.95	0.8	0.9	1.06		0.7453	0.7832	0.2028	0.4716	0.3087	0.9683	0.8594	0.9338	0.0897	0.4969	0.3147	0.614	0.6386	0.955		1.1352	1.0723	1.1025	1.042	1.0528	1.1679	0.9376	0.9898		100	100	100	100	100	100
	2655			2-arachidonoyl-GPC (20:4)*	LC/MS neg	33387		HMDB0061699	52924038					0.862667	0.73	1.08	0.93	0.63		0.2147	0.5301	0.7397	0.6932	0.3608	0.9683	0.4034	0.8592	0.66	0.7834	0.8008	0.7794	0.1511	0.7608		1.1483	1.2205	1.4131	1.0279	0.9184	0.8835	0.9533	0.9906		100	100	100	100	100	100
	2657			1-arachidonoyl-GPC (20:4n6)*	LC/MS pos late	33228	C05208	HMDB0010395	24779476					1.03137	0.91	1.19	0.95	0.73		0.1016	0.4043	0.531	0.6232	0.1884	0.9683	0.6366	0.9145	0.1479	0.5841	0.7991	0.7794	0.0506	0.7572		1.0104	1.1192	1.1696	1.0687	0.9333	0.8511	1.0155	1.0421		100	100	100	100	100	100
	2658			1-eicosapentaenoyl-GPC (20:5)*	LC/MS pos late	44563		HMDB0010397						1.20635	1.76	0.87	0.81	1.64		0.777	0.7927	0.2807	0.5113	0.1026	0.9683	0.0717	0.666	0.6643	0.7834	0.303	0.6091	0.1965	0.7702		1.0768	1.1278	0.8167	1.439	1.248	1.337	1.1591	1.299		100	100	100	100	100	100
	2660			1-behenoyl-GPC (22:0)	LC/MS pos late	39792		HMDB0010398	24779479					1.05596	1.09	1.02	0.97	1.03		0.9223	0.8308	0.9188	0.7421	0.5488	0.9683	0.6377	0.9145	0.7083	0.7952	0.601	0.722	0.7356	0.9875		1.1437	1.1781	1.1282	1.2279	1.1733	1.1591	1.1876	1.2077		100	100	100	100	100	100
	2662			1-erucoyl-GPC (22:1)*	LC/MS pos late	55070		HMDB0010399	53480471					0.67266	0.92	0.5	0.77	1.42		0.7321	0.7808	0.1441	0.4377	0.2126	0.9683	0.8804	0.9398	0.046	0.4259	0.2341	0.5852	0.5385	0.9222		1.4071	1.1185	1.1651	1.0719	1.2351	1.6491	0.8211	0.9465		100	100	100	100	95	100
	2663			1-adrenoyl-GPC (22:4)*	LC/MS pos late	52698		HMDB0010401	52924039					0.788902	0.62	1.05	1.09	0.64		0.2163	0.5316	0.2126	0.4771	0.0553	0.9683	0.0362	0.6452	0.5938	0.7607	0.5884	0.7147	0.0368	0.7064		1.2615	1.2434	1.536	0.9507	1.0133	0.9869	1.0397	0.9952		100	100	100	100	100	100
	2667			1-docosahexaenoyl-GPC (22:6)*	LC/MS pos late	33822		HMDB0010404	10415542					0.87322	1.18	0.64	0.72	1.32		0.4119	0.6679	0.5714	0.6313	0.0822	0.9683	0.4179	0.86	0.0855	0.4911	0.0577	0.4717	0.5225	0.917		1.1445	1.0746	0.9877	1.1614	1.0694	1.3012	0.8375	0.9994		100	100	100	100	100	100
	2668			2-docosahexaenoyl-GPC (22:6)*	LC/MS neg	46203		HMDB0010404						0.764748	0.91	0.63	0.74	1.08		0.3875	0.6614	0.3866	0.5708	0.3516	0.9683	0.9642	0.9453	0.1812	0.5916	0.1816	0.5485	0.9633	1		1.2476	1.1499	1.2016	1.0982	1.0518	1.2937	0.81	0.9541		100	100	100	100	100	100
	2671			1-lignoceroyl-GPC (24:0)	LC/MS pos late	49617		HMDB0010405	24779481					0.982284	1	0.96	0.85	0.88		0.2834	0.5998	0.8165	0.7058	0.6547	0.9683	0.8849	0.9398	0.6107	0.7645	0.256	0.5908	0.6707	0.9652		1.0725	1.139	1.1389	1.1391	0.987	1.0061	0.9679	1.0535		93	100	100	100	81	83
	2673			1-nervonoyl-GPC (24:1n9)*	LC/MS pos late	55071		HMDB0010406	53480477					0.700082	0.88	0.53	0.65	1.07		0.4396	0.6892	0.1125	0.4088	0.0802	0.9683	0.9073	0.9435	0.0148	0.3056	0.0611	0.4717	0.4965	0.9029		1.3447	1.2199	1.2996	1.1403	1.0662	1.3899	0.7425	0.9414		100	100	100	100	81	100
	2684			1-palmitoyl-GPE (16:0)	LC/MS pos late	35631		HMDB0011503	9547069					0.985287	1.1	0.88	0.84	1.05		0.3945	0.6631	0.7802	0.6979	0.0863	0.9683	0.3252	0.826	0.1338	0.5603	0.0571	0.4717	0.5468	0.9291		1.0467	1.0733	1.0235	1.1232	1.0047	1.0699	0.9394	1.0313		100	100	100	100	100	100
	2686			1-palmitoleoyl-GPE (16:1)*	LC/MS pos late	34565		HMDB0011474	53480923					0.900589	1.19	0.76	1.26	1.98		0.0771	0.362	0.9647	0.7473	0.2262	0.9683	0.4308	0.8612	0.3447	0.6963	0.6591	0.7405	0.0484	0.7555		1.1548	0.8469	0.7747	0.9191	1.3479	1.535	1.1609	1.04		93	93	88	100	86	100
	2690			1-margaroyl-GPE (17:0)*	LC/MS pos late	37419		HMDB0061691	52925149					1.05308	1.15	0.96	0.84	1.01		0.5088	0.7183	0.6479	0.6667	0.3278	0.9683	0.3365	0.8341	0.692	0.7877	0.2218	0.5742	0.8284	0.9953		1.0022	1.0711	0.9968	1.1453	0.9865	1.0076	0.9655	1.0554		100	100	100	100	100	100
	2691			1-stearoyl-GPE (18:0)	LC/MS pos late	42398		HMDB0011130	9547068					1.00804	1.03	0.98	0.83	0.87		0.0917	0.3878	0.9026	0.7394	0.5629	0.9683	0.6381	0.9145	0.7316	0.8059	0.0911	0.507	0.4441	0.8925		1.0449	1.1325	1.1148	1.1502	0.9657	0.9751	0.9563	1.0533		100	100	100	100	100	100
	2692			2-stearoyl-GPE (18:0)*	LC/MS neg	41220		HMDB0011129	90658453;53480667					1.3874	1.75	1.06	0.67	1.11		0.8333	0.8098	0.406	0.5804	0.2227	0.9683	0.1715	0.7773	0.7652	0.8182	0.2831	0.6091	0.4939	0.9029		0.73	0.9512	0.6908	1.2116	0.7916	0.7691	0.8141	1.0128		93	93	88	100	86	100
	2693			1-oleoyl-GPE (18:1)	LC/MS pos late	35628		HMDB0011506	9547071					1.03359	1.33	0.81	0.81	1.33		0.4574	0.6962	0.8087	0.7053	0.1762	0.9683	0.4502	0.8701	0.2312	0.6358	0.639	0.7324	0.1618	0.7608		1.1639	1.1618	0.997	1.3267	1.205	1.3308	1.0792	1.203		100	100	100	100	100	100
	2694			2-oleoyl-GPE (18:1)*	LC/MS neg	45455		HMDB11476						1.10211	1.44	0.84	0.75	1.28		0.3896	0.6618	0.7039	0.6815	0.207	0.9683	0.2705	0.7934	0.5022	0.7293	0.757	0.7662	0.1571	0.7608		1.1458	1.2232	1.0046	1.4417	1.1854	1.2869	1.0839	1.2628		93	86	88	83	95	100
	2695			1-linoleoyl-GPE (18:2)*	LC/MS pos late	36600		HMDB0011507	52925130					1.04467	1.36	0.8	0.76	1.28		0.8495	0.8132	0.9072	0.7409	0.0812	0.9683	0.2073	0.785	0.2157	0.6188	0.236	0.5865	0.1908	0.7682		1.0901	1.1246	0.9543	1.2949	1.1043	1.2259	0.9826	1.1388		100	100	100	100	100	100
	2696			2-linoleoyl-GPE (18:2)*	LC/MS neg	36593		HMDB11477						1.0185	1.46	0.69	0.64	1.35		0.9977	0.838	0.818	0.7063	0.085	0.9683	0.3073	0.8128	0.1415	0.5717	0.191	0.5485	0.2424	0.8171		1.1354	1.1897	0.9673	1.4121	1.102	1.3034	0.9006	1.1564		100	100	100	100	100	100
	2697			1-linolenoyl-GPE (18:3)*	LC/MS pos late	57509		HMDB0011509 HMDB0011479	52925148					1.40467	2.01	0.83	0.43	1.05		0.5013	0.7176	0.4052	0.5804	0.1152	0.9683	0.1084	0.7227	0.5645	0.7508	0.0943	0.507	0.5329	0.922		1.07	1.5728	1.0455	2.1002	1.0002	1.0945	0.9058	1.503		100	100	100	100	100	100
	2702			1-eicosenoyl-GPE (20:1)*	LC/MS neg	62352		HMDB0011518	52925139					0.764613	0.75	0.78	1.13	1.09		0.8908	0.8255	0.6998	0.6798	0.7595	0.9752	0.9574	0.9453	0.6043	0.7636	0.7396	0.7577	0.9097	1		1.5757	1.3201	1.5081	1.132	1.4604	1.6433	1.2775	1.2048		71	86	88	83	76	50
	2705			1-dihomo-linolenoyl-GPE (20:3n3 or 6)*	LC/MS neg	44630		HMDB0011516 HMDB0011514						0.903157	1.08	0.77	0.9	1.27		0.5818	0.743	0.6874	0.6753	0.3034	0.9683	0.6705	0.9186	0.2843	0.6561	0.7158	0.7507	0.2905	0.8358		1.2639	1.1564	1.1143	1.1986	1.249	1.4135	1.0845	1.1415		100	100	100	100	100	100
	2708			1-arachidonoyl-GPE (20:4n6)*	LC/MS pos late	35186		HMDB0011517	42607465					1.05363	0.98	1.13	1.04	0.91		0.811	0.805	0.6415	0.6641	0.417	0.9683	0.8146	0.9333	0.3397	0.6956	0.6658	0.7408	0.4808	0.8977		0.9976	1.0363	1.0442	1.0283	1.0125	0.951	1.0739	1.0511		100	100	100	100	100	100
	2709			2-arachidonoyl-GPE (20:4)*	LC/MS neg	32815		HMDB0011487	53480936					0.930894	0.93	0.93	0.84	0.84		0.4719	0.702	0.8457	0.7191	0.9419	0.978	0.9348	0.9453	0.841	0.8351	0.552	0.6928	0.6635	0.9628		1.0086	1.0596	1.0977	1.0215	0.8879	0.9195	0.8563	0.9389		93	86	88	83	95	100
	2710			1-eicosapentaenoyl-GPE (20:5)*	LC/MS pos late	47888		HMDB0011489	53480938					1.27955	2.12	0.87	0.83	2.04		0.3764	0.6567	0.2004	0.4716	0.0483	0.9456	0.0312	0.6452	0.5787	0.7552	0.3914	0.6317	0.0565	0.7604		1.149	1.1788	0.7551	1.6026	1.4403	1.5429	1.3377	1.4702		100	100	100	100	100	100
	2719			1-docosahexaenoyl-GPE (22:6)*	LC/MS pos late	44633								0.955334	1.14	0.8	0.86	1.22		0.927	0.8311	0.9536	0.745	0.1503	0.9683	0.3494	0.841	0.2589	0.6517	0.2488	0.5865	0.3609	0.8621		1.0612	1.0231	0.9558	1.0905	1.0518	1.1666	0.937	1.0138		100	100	100	100	100	100
	2730			1-palmitoyl-GPG (16:0)*	LC/MS neg	45970		HMDB0240601	3300276					1.13447	1.27	1.01	0.88	1.11		0.7722	0.7923	0.4689	0.6054	0.5478	0.9683	0.3753	0.8565	0.9256	0.8505	0.8144	0.7794	0.5505	0.9291		0.9824	1.0586	0.9328	1.1844	1.0383	1.032	1.0445	1.1145		86	86	88	83	90	83
	2733			1-stearoyl-GPG (18:0)	LC/MS neg	34437								0.975012	0.78	1.2	1.35	0.88		0.4558	0.6951	0.9726	0.7485	0.3762	0.9683	0.5668	0.9083	0.4895	0.7286	0.2243	0.5748	0.9244	1		1.0445	0.9904	1.114	0.8669	1.0724	0.975	1.1699	1.0184		100	93	100	83	100	100
	2735			1-oleoyl-GPG (18:1)*	LC/MS neg	45968		HMDB0240602						0.820128	0.89	0.75	0.9	1.07		0.9661	0.8346	0.2318	0.4834	0.3114	0.9683	0.8991	0.9404	0.1017	0.5152	0.465	0.6607	0.4775	0.8977		1.2192	1.1141	1.1769	1.0514	1.105	1.2615	0.9484	0.9999		100	100	100	100	100	100
	2737			1-linoleoyl-GPG (18:2)*	LC/MS neg	54885		HMDB0240600						1.08659	1.21	0.97	0.85	1.05		0.6772	0.7671	0.3723	0.5633	0.3842	0.9683	0.2394	0.7881	0.9866	0.8587	0.336	0.6229	0.7585	0.9875		1.0821	1.1636	1.0547	1.2725	1.0944	1.1095	1.0792	1.1758		100	100	100	100	100	100
	2739			1-palmitoyl-GPI (16:0)	LC/MS neg	35305		HMDB0061695	71296207					0.918456	1.06	0.76	0.63	0.89		0.0249	0.2868	0.3748	0.5644	0.1026	0.9683	0.6039	0.9145	0.0619	0.4636	0.0049	0.2313	0.6539	0.9581		1.1086	1.2116	1.1759	1.2473	0.9152	1.0412	0.7892	1.0182		100	100	100	100	100	100
	2740			1-palmitoleoyl-GPI (16:1)*	LC/MS neg	36618		HMDB0061695						0.781963	0.96	0.65	0.91	1.35		0.7649	0.791	0.1369	0.4292	0.2965	0.9683	0.757	0.9257	0.0613	0.4636	0.3144	0.614	0.6137	0.955		1.3461	1.1237	1.1467	1.1007	1.275	1.5454	1.0045	1.0526		100	100	100	100	95	100
	2743			1-stearoyl-GPI (18:0)	LC/MS neg	19324		HMDB0240261	71581135;42607495					0.849586	0.89	0.8	0.71	0.78		0.009	0.2337	0.1372	0.4292	0.4216	0.9683	0.6365	0.9145	0.0891	0.4969	0.0111	0.2852	0.1957	0.7702		1.1588	1.2253	1.2996	1.1511	0.9179	1.0179	0.8179	0.9845		100	100	100	100	100	100
	2744			2-stearoyl-GPI (18:0)*	LC/MS neg	39223		HMDB0061704	131770413					0.887902	0.95	0.81	0.63	0.74		0.0011	0.0985	0.2854	0.5113	0.2723	0.9683	0.9838	0.9453	0.1083	0.5212	0.0013	0.1573	0.1066	0.7608		1.1151	1.2485	1.2836	1.2134	0.8567	0.9466	0.7668	0.9901		100	100	100	100	100	100
	2745			1-oleoyl-GPI (18:1)	LC/MS neg	36602		HMDB0061693	86289645					0.917681	1.09	0.73	0.63	0.94		0.16	0.4924	0.5327	0.6232	0.1308	0.9683	0.5411	0.8975	0.1117	0.5212	0.0321	0.4109	0.9403	1		1.2646	1.3617	1.3033	1.42	1.0634	1.2259	0.901	1.1605		100	100	100	100	100	100
	2747			1-linoleoyl-GPI (18:2)*	LC/MS neg	36594		HMDB0240597	11124828					0.80853	0.99	0.62	0.6	0.95		0.0395	0.3131	0.0621	0.3359	0.0423	0.9368	0.9038	0.9427	0.0048	0.2434	0.0032	0.2261	0.9827	1		1.231	1.2515	1.2603	1.2427	0.9748	1.2018	0.7479	0.9953		100	100	100	100	100	100
	2753			1-arachidonoyl-GPI (20:4)*	LC/MS neg	34214		HMDB0061690	121596217					0.901008	0.93	0.86	0.67	0.72		0.0026	0.1522	0.4558	0.597	0.5447	0.9683	0.9243	0.9453	0.3129	0.6778	0.0065	0.2604	0.0834	0.7608		1.0809	1.2111	1.2544	1.1678	0.8438	0.9075	0.7801	0.9739		100	100	100	100	100	100
	2811		Plasmalogen	1-palmityl-2-palmitoyl-GPC (O-16:0/16:0)*	LC/MS pos late	57332			145911					0.853807	0.95	0.77	0.94	1.16		0.6615	0.7632	0.0682	0.3448	0.1597	0.9683	0.7654	0.9263	0.018	0.3221	0.4595	0.6598	0.216	0.7921		1.1136	1.0061	1.0298	0.9825	1.0583	1.1975	0.919	0.9508		100	100	100	100	100	100
	2812			1-palmityl-2-stearoyl-GPC (O-16:0/18:0)*	LC/MS pos late	55040		HMDB0013405	11803170					0.971157	1.06	0.89	0.9	1.07		0.8245	0.8086	0.665	0.6683	0.425	0.9683	0.805	0.9333	0.3574	0.6963	0.4447	0.6493	0.6975	0.9742		1.0297	1.0228	0.9926	1.053	1.0069	1.0667	0.9471	1		100	100	100	100	100	100
	2814			1-palmityl-2-linoleoyl-GPC (O-16:0/18:2)*	LC/MS pos late	53175		HMDB0011151	6443157					0.997768	1.13	0.89	0.99	1.26		0.4239	0.6766	0.9046	0.7398	0.3043	0.9683	0.4402	0.8659	0.4936	0.7286	0.8617	0.7898	0.2227	0.7933		1.1202	1.0588	0.9923	1.1254	1.1792	1.2482	1.1101	1.1177		100	100	100	100	100	100
	2816			1-palmityl-2-arachidonoyl-GPC (O-16:0/20:4)*	LC/MS pos late	52718		HMDB0007982	10747814					1.09949	0.96	1.25	1.2	0.92		0.4658	0.697	0.3513	0.5566	0.1839	0.9683	0.7836	0.9328	0.0937	0.5013	0.1258	0.507	0.68	0.9679		0.9458	0.9643	0.983	0.9456	1.0214	0.9085	1.1342	1.0399		100	100	100	100	100	100
	2817			1-stearyl-2-arachidonoyl-GPC (O-18:0/20:4)*	LC/MS pos late	57333								1.07739	0.98	1.19	1.07	0.87		0.9746	0.8346	0.7056	0.6815	0.2437	0.9683	0.5921	0.9132	0.248	0.6472	0.3925	0.6317	0.4191	0.8811		0.982	1.0365	1.0489	1.0241	1.0035	0.9151	1.0919	1.058		100	100	100	100	100	100
	2819			1-(1-enyl-oleoyl)-2-docosahexaenoyl-GPE (P-18:1/22:6)*	LC/MS pos late	55037		HMDB0011460	52925039					0.944807	1.02	0.89	1.16	1.32		0.499	0.7176	0.6621	0.6683	0.9198	0.978	0.8212	0.9333	0.6868	0.787	0.6652	0.7408	0.602	0.9458		1.0273	0.8926	0.8849	0.9003	1.1053	1.1697	1.0408	0.9706		100	93	100	83	90	100
	2820			1-(1-enyl-palmitoyl)-2-docosahexaenoyl-GPC (P-16:0/22:6)*	LC/MS pos late	52630		HMDB0011229	53480699					0.932205	1.16	0.78	0.99	1.47		0.2075	0.5235	0.5762	0.6316	0.1861	0.9683	0.6012	0.9145	0.1605	0.5888	0.9616	0.8101	0.0864	0.7608		1.1343	0.9916	0.9182	1.0649	1.2001	1.3504	1.0499	1.0574		100	100	100	100	100	100
	2822			1-(1-enyl-palmitoyl)-2-oleoyl-GPE (P-16:0/18:1)*	LC/MS pos late	52477		HMDB0011342	52925128					0.953868	0.91	1	1.25	1.14		0.0546	0.333	0.4673	0.6053	0.6503	0.9683	0.4294	0.8612	0.8361	0.8351	0.0752	0.478	0.3097	0.8421		0.9863	0.8799	0.9232	0.8366	1.0472	1.0494	1.045	0.9408		100	100	100	100	100	100
	2823			1-(1-enyl-palmitoyl)-2-linoleoyl-GPE (P-16:0/18:2)*	LC/MS pos late	52677		HMDB0011343	52925127					0.984522	0.92	1.04	1.47	1.3		0.0344	0.3019	0.7488	0.6953	0.7644	0.9752	0.989	0.9453	0.6422	0.7797	0.0686	0.4717	0.2094	0.7854		1.066	0.8876	0.9265	0.8487	1.228	1.2056	1.2504	1.0495		100	100	100	100	100	100
	2824			1-(1-enyl-palmitoyl)-2-palmitoyl-GPC (P-16:0/16:0)*	LC/MS pos late	52716		HMDB0011206	11146967					0.810036	0.89	0.75	1.1	1.3		0.0263	0.2868	0.0147	0.237	0.2975	0.9683	0.3147	0.8186	0.0103	0.2728	0.3471	0.6302	0.0299	0.6915		1.1518	0.944	1.0005	0.8874	1.1408	1.3031	0.9785	0.933		100	100	100	100	100	100
	2825			1-(1-enyl-palmitoyl)-2-palmitoleoyl-GPC (P-16:0/16:1)*	LC/MS pos late	52713		HMDB0011207	52923882					0.733283	0.9	0.61	0.92	1.36		0.2048	0.5235	0.0054	0.1631	0.026	0.8525	0.6643	0.9186	0.0004	0.1139	0.4402	0.649	0.0207	0.6553		1.3205	1.0631	1.1173	1.009	1.2257	1.5238	0.9277	0.9683		100	100	100	100	100	100
	2826			1-(1-enyl-palmitoyl)-2-arachidonoyl-GPE (P-16:0/20:4)*	LC/MS pos late	52673		HMDB0011352	52925126					1.15754	1.02	1.28	1.42	1.14		0.0543	0.333	0.2671	0.5032	0.4418	0.9683	0.8155	0.9333	0.1622	0.5888	0.0455	0.4452	0.419	0.8811		0.9515	0.8999	0.8909	0.909	1.1529	1.0122	1.2937	1.1014		100	100	100	100	100	100
	2827			1-(1-enyl-palmitoyl)-2-docosahexaenoyl-GPE (P-16:0/22:6)*	LC/MS pos late	52672		HMDB0005780	5283497					1.11291	1.11	1.12	1.17	1.16		0.2253	0.5436	0.4183	0.5887	0.9788	0.9807	0.5739	0.9083	0.5561	0.7458	0.371	0.6317	0.403	0.878		1.0043	0.9785	0.9288	1.0281	1.1435	1.0798	1.2072	1.1177		100	100	100	100	100	100
	2828			1-(1-enyl-palmitoyl)-2-oleoyl-GPC (P-16:0/18:1)*	LC/MS pos late	52478		HMDB0007996	34779384					0.733482	0.86	0.62	0.83	1.13		0.8812	0.8233	0.011	0.2279	0.1415	0.9683	0.4285	0.8612	0.0035	0.2381	0.2227	0.5742	0.3694	0.8627		1.3924	1.2119	1.3055	1.1183	1.2018	1.4794	0.9243	1.0213		100	100	100	100	100	100
	2831			1-(1-enyl-stearoyl)-2-oleoyl-GPE (P-18:0/18:1)	LC/MS pos late	52614		HMDB0011375	42607457					0.960446	0.82	1.09	1.52	1.14		0.04	0.3131	0.6369	0.6631	0.4539	0.9683	0.4137	0.8592	0.8341	0.8351	0.0373	0.4189	0.36	0.8621		1.0037	0.852	0.9384	0.7657	1.1157	1.0689	1.1624	0.964		100	100	100	100	100	100
	2832			1-(1-enyl-stearoyl)-2-linoleoyl-GPE (P-18:0/18:2)*	LC/MS pos late	52748		HMDB0011376						1.02382	1.06	1	1.32	1.4		0.0253	0.2868	0.6187	0.6525	0.6869	0.9717	0.5462	0.8975	0.9431	0.8511	0.1552	0.5365	0.074	0.7604		0.9529	0.8177	0.794	0.8415	1.1107	1.1117	1.1097	0.9756		93	93	88	100	100	100
	2835			1-(1-enyl-palmitoyl)-2-arachidonoyl-GPC (P-16:0/20:4)*	LC/MS pos late	52689		HMDB0011220						1.04294	0.89	1.21	1.27	0.93		0.2084	0.5235	0.7707	0.6979	0.0836	0.9683	0.3242	0.826	0.1287	0.5573	0.0281	0.4109	0.7382	0.9875		0.9361	0.9161	0.9709	0.8613	0.9963	0.9012	1.0914	0.9763		100	100	100	100	100	100
	2836			1-(1-enyl-palmitoyl)-2-linoleoyl-GPC (P-16:0/18:2)*	LC/MS pos late	52682		HMDB0011211	24779386					0.876933	0.97	0.8	1	1.22		0.3413	0.6415	0.2032	0.4716	0.325	0.9683	0.842	0.9333	0.0945	0.5013	0.98	0.8124	0.1967	0.7702		1.1059	0.984	0.9972	0.9708	1.0916	1.2146	0.9687	0.9698		100	100	100	100	100	100
	2838			1-(1-enyl-stearoyl)-2-arachidonoyl-GPC (P-18:0/20:4)	LC/MS pos late	52613		HMDB0011253	24779390					1.13113	0.89	1.43	1.29	0.8		0.7288	0.7802	0.4461	0.5956	0.075	0.9683	0.478	0.8715	0.059	0.4636	0.1102	0.507	0.3245	0.8486		0.9563	1.0041	1.0625	0.9456	1.0339	0.8501	1.2177	1.0817		100	100	100	100	100	100
	2840			1-(1-enyl-stearoyl)-2-arachidonoyl-GPE (P-18:0/20:4)*	LC/MS pos late	52475		HMDB0005779	9547058					1.27058	0.99	1.57	1.46	0.92		0.2869	0.6034	0.1226	0.4204	0.2244	0.9683	0.8173	0.9333	0.0421	0.4259	0.0913	0.507	0.9172	1		0.8977	0.9322	0.9361	0.9283	1.106	0.8592	1.3529	1.1406		93	93	88	100	100	100
	2841			1-(1-enyl-stearoyl)-2-docosahexaenoyl-GPC (P-18:0/22:6)*	LC/MS pos late	52704		HMDB0011262	42607430					0.943907	1.18	0.77	0.88	1.35		0.8316	0.8098	0.7124	0.6838	0.3949	0.9683	0.7442	0.9224	0.3616	0.6963	0.6302	0.7324	0.4753	0.8977		1.2301	1.1407	1.0464	1.2351	1.2504	1.4138	1.0871	1.1611		100	100	100	100	100	100
	2843			1-(1-enyl-stearoyl)-2-docosahexaenoyl-GPE (P-18:0/22:6)*	LC/MS pos late	52476		HMDB0011394	42607458					1.1121	1.18	1.06	1.14	1.27		0.3251	0.63	0.4995	0.6123	0.7604	0.9752	0.5111	0.8824	0.78	0.8226	0.6073	0.7249	0.3872	0.878		1.0401	1	0.9178	1.0822	1.1968	1.1624	1.2312	1.1567		100	100	100	100	100	100
	2847			1-(1-enyl-stearoyl)-2-oleoyl-GPC (P-18:0/18:1)	LC/MS pos late	52612		HMDB0011243	42607428					0.782918	0.93	0.66	0.81	1.14		0.9043	0.8282	0.0441	0.3072	0.2185	0.9683	0.5758	0.9083	0.0172	0.3221	0.3096	0.6121	0.4522	0.8977		1.3078	1.1757	1.2205	1.1309	1.156	1.3951	0.9169	1.0239		100	100	100	100	100	100
	2848			1-(1-enyl-oleoyl)-2-docosahexaenoyl-GPC (P-18:1/22:6)*	LC/MS pos late	62084		HMDB0011295 HMDB0011328	53480839;53480781					0.846416	1.15	0.62	0.72	1.34		0.7352	0.7808	0.2465	0.4943	0.1276	0.9683	0.7983	0.9331	0.0479	0.4259	0.1627	0.5365	0.4178	0.8811		1.3771	1.2657	1.1761	1.3552	1.277	1.578	0.976	1.1656		100	100	100	100	100	100
	2849			1-stearyl-2-linoleoyl-GPC (O-18:0/18:2)*	LC/MS pos late	57721		HMDB13418	6443070					0.970725	1.09	0.86	0.83	1.06		0.4138	0.67	0.7332	0.6917	0.2632	0.9683	0.5974	0.9145	0.2744	0.6561	0.1501	0.5286	0.8361	0.9953		1.0931	1.1126	1.0635	1.1616	1.0416	1.1226	0.9606	1.0611		86	93	88	100	95	83
	2851		Lysoplasmalogen	1-oleyl-GPC (O-18:1)*	LC/MS pos late	64896								0.871409	0.95	0.79	0.78	0.93		0.1819	0.505	0.2195	0.4808	0.2961	0.9683	0.8991	0.9404	0.0923	0.5004	0.0782	0.4858	0.8404	0.9953		1.1696	1.1779	1.2104	1.1455	1.0109	1.1288	0.8929	1.0192		100	100	100	100	100	100
	2852			1-palmityl-GPE (O-16:0)*	LC/MS pos late	55007								1.07936	1.06	1.1	1.13	1.08		0.5055	0.7176	0.8796	0.7313	0.8599	0.9757	0.9866	0.9453	0.8058	0.8306	0.5276	0.6849	0.7417	0.9875		0.9299	0.9182	0.8934	0.9429	1.0154	0.9663	1.0645	1.0037		100	100	100	100	100	100
	2853			1-palmityl-GPC (O-16:0)	LC/MS pos late	20458			3983					0.993096	1.08	0.92	0.94	1.1		0.9809	0.8346	0.7604	0.6959	0.3872	0.9683	0.7051	0.9195	0.3811	0.6972	0.5041	0.6741	0.5713	0.9343		1.0428	1.0295	0.9914	1.0676	1.049	1.0943	1.0036	1.0356		100	100	100	100	100	100
	2854			1-stearyl-GPC (O-18:0)*	LC/MS pos late	52703	C04317	HMDB0011149	2733532					1.07504	1.11	1.03	0.91	0.98		0.6015	0.743	0.8803	0.7313	0.7681	0.9752	0.7651	0.9263	0.9137	0.8491	0.5405	0.6863	0.8783	0.9953		1.0528	1.1256	1.0646	1.1866	1.059	1.0411	1.077	1.1318		100	100	100	100	100	100
	2856			1-(1-enyl-palmitoyl)-GPC (P-16:0)*	LC/MS pos late	52474		HMDB0010407	10917802					0.87711	0.91	0.85	1.01	1.09		0.4011	0.6658	0.166	0.455	0.6125	0.9683	0.5474	0.8975	0.1578	0.5888	0.8006	0.7794	0.3676	0.8621		1.0725	0.9799	1.0252	0.9347	1.0333	1.1198	0.9467	0.9407		100	100	100	100	100	100
	2857			1-(1-enyl-palmitoyl)-GPE (P-16:0)*	LC/MS pos late	39270		HMDB0011152						1.02463	1.08	0.98	1.11	1.22		0.1531	0.4851	0.9997	0.7536	0.5881	0.9683	0.7163	0.9215	0.6841	0.787	0.4966	0.6731	0.1869	0.7665		1.0558	0.9881	0.9502	1.026	1.1495	1.1615	1.1376	1.0818		100	100	100	100	100	100
	2858			1-(1-enyl-oleoyl)-GPC (P-18:1)*	LC/MS pos late	52701		HMDB0010408	52923882					0.802425	0.9	0.71	0.77	0.97		0.4541	0.6951	0.1578	0.4527	0.1901	0.9683	0.9427	0.9453	0.0449	0.4259	0.1258	0.507	0.6991	0.9742		1.3033	1.2534	1.3218	1.185	1.0957	1.2848	0.9066	1.0458		100	100	100	100	100	100
	2859			1-(1-enyl-oleoyl)-GPE (P-18:1)*	LC/MS pos late	44621								0.966541	0.99	0.94	1.04	1.1		0.5614	0.743	0.6638	0.6683	0.6304	0.9683	0.975	0.9453	0.4931	0.7286	0.94	0.806	0.477	0.8977		1.0311	0.9791	0.9824	0.9759	1.0485	1.0798	1.0173	0.9966		100	100	100	100	100	100
	2860			1-(1-enyl-stearoyl)-GPC (P-18:0)*	LC/MS pos late	52702		HMDB0013122	24779527					0.940155	0.97	0.9	0.89	0.96		0.6601	0.7632	0.4546	0.597	0.7657	0.9752	0.7614	0.9257	0.4335	0.7092	0.5805	0.7129	0.924	1		1.1229	1.1331	1.148	1.1181	1.0455	1.0977	0.9933	1.0557		100	100	100	100	100	100
	2861			1-(1-enyl-stearoyl)-GPE (P-18:0)*	LC/MS pos late	39271		HMDB0240598						1.10551	1.11	1.1	1.11	1.13		0.3181	0.623	0.5578	0.6291	0.9291	0.978	0.6504	0.9164	0.7087	0.7952	0.493	0.6731	0.4644	0.8977		0.9629	0.9571	0.9056	1.0085	1.0703	1.0203	1.1204	1.0645		100	100	100	100	100	100
	2865		Glycerolipid Metabolism	glycerol	LC/MS neg	15122	C00116	HMDB0000131	753					0.818565	0.87	0.76	0.79	0.89		0.2191	0.5343	0.1373	0.4292	0.5969	0.9683	0.5111	0.8824	0.1325	0.5602	0.1895	0.5485	0.6325	0.955		1.2098	1.1943	1.2792	1.1095	1.0058	1.1404	0.8712	0.9903		100	100	100	100	100	100
	2866			glycerol 3-phosphate	LC/MS pos early	43847	C0093	HMDB0000126	754					0.976921	1.07	0.9	0.95	1.13		0.6319	0.7553	0.7241	0.6884	0.5536	0.9683	0.8718	0.9358	0.4791	0.7273	0.9318	0.8031	0.4731	0.8977		1.0009	0.971	0.9402	1.0017	1.0077	1.0615	0.9539	0.9778		100	100	100	100	95	100
	2871			glycerophosphoglycerol	LC/MS polar	48857	C03274	HMDB0240316	54575349					0.850448	0.88	0.84	1.89	1.98		0.001	0.0952	0.1794	0.4558	0.9885	0.9807	0.3689	0.846	0.3058	0.6745	0.0107	0.2852	0.0202	0.6553		1.1053	0.6954	0.7406	0.6502	1.3499	1.47	1.2298	0.94		100	86	100	67	100	100
	2873		Monoacylglycerol	1-myristoylglycerol (14:0)	LC/MS neg	35625	C01885	HMDB0011561	10957631					1.32654	1.31	1.34	1.1	1.08		0.8056	0.8034	0.2885	0.5127	0.842	0.9757	0.3967	0.8592	0.5146	0.7379	0.972	0.811	0.7651	0.9875		0.9524	1.0603	0.9169	1.2037	1.1555	0.9879	1.3231	1.2634		86	86	88	83	90	83
	2875			1-pentadecanoylglycerol (15:0)	LC/MS neg	47898			190750					0.902559	0.91	0.89	1.02	1.05		0.7694	0.7914	0.475	0.6063	0.7845	0.9752	0.7662	0.9263	0.4594	0.7202	0.9882	0.8124	0.704	0.9757		0.977	0.9121	0.9528	0.8713	0.9467	1.0013	0.8922	0.8818		79	79	75	83	67	83
	2876			1-palmitoylglycerol (16:0)	LC/MS neg	21127		HMDB0011564	14900					0.659585	0.64	0.67	1.35	1.29		0.0297	0.3019	0.0199	0.24	0.787	0.9752	0.1533	0.7463	0.0494	0.4259	0.1424	0.5184	0.0969	0.7608		1.4497	1.0392	1.2643	0.8141	1.3667	1.635	1.0984	0.9562		100	100	100	100	100	100
	2877			1-palmitoleoylglycerol (16:1)*	LC/MS neg	52431		HMDB0011565						0.928571	0.82	1.05	1.15	0.89		0.912	0.8282	0.4934	0.6111	0.9052	0.9779	0.7033	0.9195	0.5464	0.7428	0.9949	0.8124	0.8776	0.9953		1.2488	1.1982	1.3193	1.0772	1.2102	1.1784	1.2419	1.1596		100	100	100	100	100	100
	2880			1-oleoylglycerol (18:1)	LC/MS neg	21184		HMDB0011567	5283468					0.663073	0.56	0.8	1.1	0.77		0.9134	0.8282	0.0274	0.2642	0.5031	0.9683	0.0535	0.6604	0.2287	0.6331	0.5592	0.696	0.7059	0.9767		1.5303	1.3463	1.7262	0.9665	1.1986	1.3343	1.0629	1.0147		100	100	100	100	100	100
	2881			1-linoleoylglycerol (18:2)	LC/MS neg	27447		HMDB0011568	5283469					0.792115	1.02	0.63	0.83	1.34		0.6631	0.7632	0.0368	0.2939	0.0104	0.8182	0.717	0.9215	0.0009	0.1139	0.0961	0.507	0.0417	0.7238		1.2353	1.0626	1.054	1.0712	1.1512	1.4167	0.8857	0.9785		100	100	100	100	100	100
	2882			1-linolenoylglycerol (18:3)	LC/MS neg	34393		HMDB0011569	53480978					1.58637	2.21	0.89	0.36	0.89		0.3807	0.6576	0.4056	0.5804	0.1153	0.9683	0.1085	0.7227	0.5642	0.7508	0.0692	0.4717	0.6273	0.955		0.9917	1.6815	1.0476	2.3154	0.8834	0.9358	0.831	1.5732		86	86	75	100	95	100
	2886			1-dihomo-linolenylglycerol (20:3)	LC/MS neg	48341		HMDB0011577						0.621835	0.68	0.57	0.93	1.12		0.6002	0.743	0.0093	0.2039	0.2093	0.9683	0.3247	0.826	0.0048	0.2434	0.5766	0.7111	0.2334	0.8032		1.3822	1.0965	1.3042	0.8888	1.1453	1.4603	0.8303	0.8595		100	100	100	100	100	100
	2887			1-arachidonylglycerol (20:4)	LC/MS neg	34397	C13857	HMDB11578	16019980;5282281					0.922974	0.85	1.01	0.93	0.79		0.5677	0.743	0.6068	0.6448	0.7068	0.9717	0.5505	0.8989	0.9169	0.8491	0.883	0.7933	0.5255	0.9201		1.1918	1.2358	1.3331	1.1386	1.056	1.0506	1.0614	1.1		100	100	100	100	100	100
	2891			1-docosahexaenoylglycerol (22:6)	LC/MS neg	35153		HMDB0011587	53480995					0.664319	1.01	0.46	0.79	1.73		0.7725	0.7923	0.1598	0.4541	0.1023	0.9683	0.8714	0.9358	0.0257	0.3632	0.3046	0.6091	0.1948	0.7702		1.6328	1.202	1.1942	1.2097	1.5155	2.0713	0.9596	1.0847		100	100	100	100	100	100
	2893			2-palmitoylglycerol (16:0)	LC/MS neg	33419		HMDB0011533	123409					0.817061	0.78	0.86	0.9	0.81		0.2191	0.5343	0.567	0.6291	0.8592	0.9757	0.6149	0.9145	0.7663	0.8187	0.4261	0.645	0.3438	0.8621		1.1922	1.1702	1.3156	1.0247	0.9961	1.0687	0.9235	0.9741		93	100	100	100	95	83
	2896			2-oleoylglycerol (18:1)	LC/MS neg	21232		HMDB0011537	5319879					0.722974	0.67	0.77	1.17	1.02		0.3011	0.6119	0.2283	0.4828	0.5536	0.9683	0.6754	0.9186	0.1802	0.5916	0.7365	0.7565	0.2767	0.8294		1.3663	1.1312	1.3539	0.9085	1.2229	1.3787	1.0671	0.9878		100	100	100	100	100	100
	2897			2-linoleoylglycerol (18:2)	LC/MS neg	32506		HMDB0011538	5365676					0.708374	0.88	0.58	0.92	1.38		0.4437	0.6915	0.0231	0.2503	0.0715	0.9683	0.727	0.9215	0.0032	0.2381	0.4199	0.6396	0.0862	0.7608		1.4474	1.1426	1.2144	1.0708	1.3301	1.6804	0.9799	1.0253		100	100	100	100	100	100
	2898			2-arachidonoylglycerol (20:4)	LC/MS neg	19266	C13856	HMDB0004666	5282280					0.88813	0.87	0.91	0.73	0.69		0.1654	0.4944	0.6328	0.661	0.6352	0.9683	0.9981	0.9453	0.4761	0.7271	0.1642	0.5365	0.5323	0.922		1.2452	1.3746	1.4698	1.2795	0.9764	1.0205	0.9323	1.1059		100	100	100	100	100	100
	2900			2-docosahexaenoylglycerol (22:6)*	LC/MS neg	48675		HMDB0011557	46896303					0.562652	0.81	0.4	0.77	1.54		0.7894	0.7987	0.1082	0.4006	0.1605	0.9683	0.8856	0.9398	0.0272	0.3632	0.3876	0.6317	0.2609	0.8277		1.3152	0.9345	1.0349	0.8341	1.1207	1.5955	0.6459	0.74		64	79	63	100	57	67
	2902			1-heptadecenoylglycerol (17:1)*	LC/MS neg	62449								0.972189	0.95	0.99	1.3	1.25		0.3308	0.6307	0.9879	0.7506	0.767	0.9752	0.8344	0.9333	0.833	0.8351	0.6089	0.7249	0.3946	0.878		1.0895	0.9456	0.9687	0.9225	1.2031	1.2102	1.196	1.0592		86	86	88	83	90	83
	2909			1-dihomo-linoleoylglycerol (20:2)	LC/MS neg	35103								0.66379	0.61	0.73	0.97	0.82		0.6249	0.7521	0.0173	0.24	0.8651	0.9757	0.1262	0.7227	0.0528	0.438	0.6214	0.7295	0.8301	0.9953		1.4021	1.2424	1.5423	0.9426	1.0904	1.2619	0.9189	0.9307		100	100	100	100	100	100
	2912		Diacylglycerol	diacylglycerol (14:0/18:1, 16:0/16:1) [1]*	LC/MS pos late	54953								2.19946	1.8	2.64	1.35	0.92		0.9484	0.8342	0.0336	0.2894	0.8548	0.9757	0.1164	0.7227	0.1364	0.5648	0.8526	0.7866	0.9367	1		0.7846	1.1452	0.8188	1.4716	1.3652	0.7504	1.9799	1.7257		100	100	100	100	100	100
	2913			diacylglycerol (14:0/18:1, 16:0/16:1) [2]*	LC/MS pos late	54954								2.06872	1.6	2.6	1.42	0.88		0.8759	0.8233	0.0552	0.3246	0.8132	0.9752	0.2482	0.7881	0.1043	0.5152	0.7686	0.7695	0.9571	1		0.7334	1.0178	0.7817	1.2538	1.2328	0.685	1.7806	1.5172		86	93	88	100	86	83
	2914			diacylglycerol (16:1/18:2 [2], 16:0/18:3 [1])*	LC/MS pos late	54966								1.58876	1.54	1.65	0.81	0.76		0.3152	0.6209	0.1755	0.4558	0.8297	0.9752	0.4387	0.8659	0.2383	0.6415	0.5509	0.6928	0.4127	0.878		0.7188	1.0412	0.8187	1.2638	0.8195	0.6188	1.0201	1.142		71	86	88	83	76	50
	2923			myristoyl-linoleoyl-glycerol (14:0/18:2) [1]*	LC/MS pos late	57407		HMDB0007016	14275352					2.26608	2.11	2.42	1.2	1.05		0.9414	0.8342	0.0045	0.1583	0.7356	0.9752	0.0292	0.6452	0.0494	0.4259	0.8428	0.7865	0.7826	0.9875		0.7276	1.1025	0.7095	1.4956	1.2738	0.7458	1.8019	1.6488		93	93	88	100	100	100
	2926			palmitoyl-palmitoyl-glycerol (16:0/16:0) [2]*	LC/MS pos late	54990		HMDB0007098	644078					1.72199	1.28	2.06	2.09	1.31		0.1684	0.4944	0.2038	0.4716	0.5856	0.9683	0.6197	0.9145	0.1753	0.589	0.1514	0.5313	0.5685	0.9343		0.5471	0.5417	0.4745	0.609	0.9474	0.6197	1.2752	0.9421		43	29	25	33	57	67
	2929			palmitoyl-oleoyl-glycerol (16:0/18:1) [1]*	LC/MS pos late	54943	C13861	HMDB0007102	5282283					1.23232	0.9	1.67	1.41	0.76		0.8601	0.8171	0.4312	0.5916	0.3487	0.9683	0.9184	0.9453	0.1993	0.6021	0.4035	0.6317	0.6074	0.9533		0.9801	1.0592	1.1157	1.0028	1.1287	0.8446	1.4128	1.2078		100	100	100	100	100	100
	2930			palmitoyl-oleoyl-glycerol (16:0/18:1) [2]*	LC/MS pos late	54942	C13861	HMDB0007102	5282283					1.18189	0.89	1.52	1.46	0.86		0.5724	0.743	0.6623	0.6683	0.2879	0.9683	0.6705	0.9186	0.2623	0.6537	0.2247	0.5748	0.7342	0.9875		0.9962	1.015	1.0727	0.9573	1.1586	0.9196	1.3976	1.1774		100	100	100	100	100	100
	2931			palmitoyl-linoleoyl-glycerol (16:0/18:2) [1]*	LC/MS pos late	52633		HMDB0007103	9543695					1.35281	1.07	1.72	1.23	0.76		0.8212	0.8082	0.0528	0.3184	0.236	0.9683	0.5928	0.9132	0.0217	0.3417	0.4676	0.6608	0.3427	0.8621		0.8316	0.9757	0.9431	1.0084	0.9809	0.7202	1.2416	1.125		100	100	100	100	100	100
	2932			palmitoyl-linoleoyl-glycerol (16:0/18:2) [2]*	LC/MS pos late	52634		HMDB0007103	131801744					1.18061	0.97	1.41	1.33	0.92		0.6575	0.7632	0.2787	0.5113	0.2685	0.9683	0.9872	0.9453	0.1046	0.5152	0.2467	0.5865	0.652	0.9574		0.9003	0.9267	0.9401	0.9133	1.0365	0.8605	1.2125	1.0629		100	100	100	100	100	100
	2933			palmitoyl-linolenoyl-glycerol (16:0/18:3) [2]*	LC/MS pos late	54965		HMDB0007104 HMDB0007105	348277338;348277337					1.48488	1.41	1.6	0.7	0.62		0.2007	0.5235	0.1784	0.4558	0.8704	0.9757	0.3091	0.8134	0.3702	0.6963	0.2781	0.6082	0.4491	0.8952		1.0745	1.6043	1.3295	1.8791	1.0657	0.8195	1.312	1.5955		93	100	100	100	90	83
	2936			palmitoleoyl-linoleoyl-glycerol (16:1/18:2) [1]*	LC/MS pos late	54967		HMDB0007132	9543699					1.35824	1.35	1.37	0.94	0.92		0.6044	0.7432	0.1829	0.4575	0.683	0.9717	0.243	0.7881	0.4815	0.7273	0.4881	0.6721	0.941	1		0.9597	1.1719	0.9988	1.345	1.0913	0.9207	1.262	1.3035		100	100	100	100	100	100
	2938			palmitoyl-arachidonoyl-glycerol (16:0/20:4) [1]*	LC/MS pos late	54957		HMDB0007112	9543736					1.89153	1.44	2.35	1.6	0.98		0.6048	0.7432	0.1869	0.4609	0.7167	0.9742	0.5143	0.8837	0.2077	0.6107	0.5098	0.6752	0.917	1		0.6481	0.7991	0.6538	0.9443	1.075	0.6424	1.5075	1.2259		57	43	38	50	76	83
	2939			palmitoyl-arachidonoyl-glycerol (16:0/20:4) [2]*	LC/MS pos late	54958		HMDB0007112	9543736					1.30775	0.72	2.23	1.97	0.63		0.6977	0.7754	0.499	0.6123	0.0478	0.9456	0.3628	0.846	0.048	0.4259	0.0754	0.478	0.2715	0.8287		0.826	0.8696	1.0109	0.7283	1.0366	0.6411	1.4321	1.0802		86	86	100	67	86	67
	2940			palmitoleoyl-arachidonoyl-glycerol (16:1/20:4) [2]*	LC/MS pos late	57406								1.98336	1.2	3.66	1.43	0.47		0.4743	0.7038	0.0416	0.2987	0.1378	0.9683	0.6893	0.9195	0.0102	0.2728	0.5533	0.6929	0.1417	0.7608		0.8175	1.2256	1.1148	1.3363	1.2133	0.5202	1.9064	1.6214		93	93	100	83	90	83
	2941			palmitoyl-docosahexaenoyl-glycerol (16:0/22:6) [1]*	LC/MS pos late	57373		HMDB0007121	9543827					1.66997	1.41	1.94	1.35	0.98		0.6459	0.7593	0.1252	0.4204	0.8307	0.9752	0.3685	0.846	0.1888	0.598	0.6139	0.7273	0.8688	0.9953		0.6454	0.7833	0.6503	0.9163	0.9399	0.6405	1.2394	1.0778		64	57	50	67	76	83
	2948			oleoyl-oleoyl-glycerol (18:1/18:1) [1]*	LC/MS pos late	54945		HMDB0007218	9543716					0.939233	0.74	1.24	1.09	0.65		0.4508	0.6946	0.7696	0.6978	0.6472	0.9683	0.6149	0.9145	0.9013	0.8465	0.8225	0.7817	0.4171	0.8811		1.1075	1.1668	1.3388	0.9948	0.9809	0.8762	1.0856	1.0402		100	100	100	100	100	100
	2949			oleoyl-oleoyl-glycerol (18:1/18:1) [2]*	LC/MS pos late	54946		HMDB0007218	9543716					0.952858	0.8	1.15	1.08	0.75		0.7011	0.776	0.6464	0.6661	0.7975	0.9752	0.6315	0.9145	0.8791	0.8441	0.9238	0.8031	0.6677	0.9652		1.1688	1.2003	1.3323	1.0683	1.0822	1.0053	1.159	1.1137		100	100	100	100	100	100
	2951			oleoyl-linoleoyl-glycerol (18:1/18:2) [1]	LC/MS pos late	46798		HMDB0007219	14275396					1.09687	0.91	1.37	1.03	0.68		0.2387	0.5569	0.3884	0.5708	0.2233	0.9683	0.8067	0.9333	0.1224	0.542	0.9754	0.811	0.1112	0.7608		1.0261	1.1641	1.2204	1.1079	0.9874	0.8318	1.1431	1.1255		100	100	100	100	100	100
	2952			oleoyl-linoleoyl-glycerol (18:1/18:2) [2]	LC/MS pos late	46799		HMDB0007219	71433693					1.00106	0.84	1.22	1.08	0.74		0.5648	0.743	0.9034	0.7394	0.3484	0.9683	0.5818	0.9098	0.4265	0.7092	0.7832	0.7729	0.3114	0.8428		1.0414	1.1008	1.1971	1.0046	0.983	0.8857	1.0803	1.0425		100	100	100	100	100	100
	2956			linoleoyl-linoleoyl-glycerol (18:2/18:2) [1]*	LC/MS pos late	54968		HMDB0007248	9543729					1.31749	1.19	1.5	0.91	0.72		0.2485	0.5626	0.0906	0.3753	0.6258	0.9683	0.4067	0.8592	0.1031	0.5152	0.6118	0.7269	0.2716	0.8287		0.8753	1.1101	1.0152	1.205	0.9184	0.7354	1.1013	1.1532		100	100	100	100	100	100
	2957			linoleoyl-linoleoyl-glycerol (18:2/18:2) [2]*	LC/MS pos late	54969		HMDB0007248	9543729					1.03478	0.86	1.31	0.96	0.63		0.5417	0.7291	0.6687	0.6683	0.5343	0.9683	0.896	0.9404	0.4324	0.7092	0.9932	0.8124	0.4098	0.878		1.0551	1.2065	1.2964	1.1167	0.9404	0.8137	1.067	1.0918		100	93	100	83	100	100
	2958			linoleoyl-linolenoyl-glycerol (18:2/18:3) [1]*	LC/MS pos late	54963		HMDB0007249	14275409					2.77647	3.38	2.02	0.48	0.8		0.5056	0.7176	0.0467	0.3105	0.7266	0.9752	0.1139	0.7227	0.2067	0.6095	0.4473	0.6493	0.831	0.9953		0.731	1.7824	0.8143	2.7504	0.9782	0.6476	1.3088	2.0296		50	71	50	100	71	50
	2959			linoleoyl-linolenoyl-glycerol (18:2/18:3) [2]*	LC/MS pos late	54964		HMDB0007250	9543737					1.87357	1.98	1.71	0.57	0.67		0.1291	0.4509	0.0333	0.2894	0.8709	0.9757	0.1189	0.7227	0.1319	0.5602	0.2058	0.5585	0.3565	0.8621		0.9555	1.7106	1.1468	2.2743	1.0351	0.7641	1.3061	1.7902		100	100	100	100	100	100
	2962			stearoyl-arachidonoyl-glycerol (18:0/20:4) [1]*	LC/MS pos late	57450	C00165	HMDB0007170	6438587					1.11052	1.01	1.26	0.87	0.69		0.0272	0.2888	0.3271	0.539	0.4122	0.9683	0.9128	0.9453	0.1805	0.5916	0.2732	0.6061	0.0428	0.7238		1.0016	1.1872	1.1836	1.1908	0.9267	0.8196	1.0338	1.1123		100	100	100	100	100	100
	2963			stearoyl-arachidonoyl-glycerol (18:0/20:4) [2]*	LC/MS pos late	57449		HMDB0007170	6438587					0.993473	0.91	1.12	0.85	0.68		0.0564	0.333	0.9762	0.7485	0.6003	0.9683	0.74	0.9224	0.6777	0.787	0.2845	0.6091	0.1021	0.7608		1.1031	1.2486	1.3094	1.1878	0.9504	0.8968	1.004	1.0959		100	100	100	100	100	100
	2964			oleoyl-arachidonoyl-glycerol (18:1/20:4) [1]*	LC/MS pos late	54960		HMDB0007228	9543786					1.23153	0.87	1.87	1.21	0.56		0.3648	0.6551	0.1693	0.455	0.049	0.9456	0.67	0.9186	0.0144	0.3056	0.4037	0.6317	0.0553	0.7604		0.961	1.1494	1.2288	1.07	0.9951	0.6932	1.297	1.1835		100	100	100	100	100	100
	2966			linoleoyl-arachidonoyl-glycerol (18:2/20:4) [1]*	LC/MS pos late	54955		HMDB0007257	9543796					1.56143	1.17	2.25	1.09	0.57		0.0977	0.3994	0.0063	0.1631	0.0402	0.9368	0.5998	0.9145	0.0006	0.1139	0.7469	0.7607	0.0148	0.6553		0.7618	1.0564	0.9732	1.1395	0.895	0.5504	1.2395	1.1895		100	100	100	100	100	100
	2967			linoleoyl-arachidonoyl-glycerol (18:2/20:4) [2]*	LC/MS pos late	54956		HMDB0007257	9543796					1.52291	1.24	1.95	1.04	0.67		0.2999	0.6119	0.0082	0.1829	0.1892	0.9683	0.3274	0.827	0.0038	0.2381	0.8303	0.784	0.118	0.7608		0.8797	1.1836	1.056	1.3112	1.0358	0.7034	1.3682	1.3397		100	100	100	100	100	100
	2970			linoleoyl-docosahexaenoyl-glycerol (18:2/22:6) [1]*	LC/MS pos late	54949		HMDB0007266	9543899					1.94284	1.59	2.33	1.33	0.91		0.6375	0.7553	0.0636	0.3384	0.6822	0.9717	0.3187	0.8223	0.0895	0.4969	0.5098	0.6752	0.9668	1		0.5528	0.7495	0.5788	0.9201	0.8774	0.5268	1.228	1.074		64	71	63	83	86	67
	2971			linoleoyl-docosahexaenoyl-glycerol (18:2/22:6) [2]*	LC/MS pos late	54950		HMDB0007266	9543899					1.75138	1.32	2.38	1.23	0.68		0.7349	0.7808	0.0245	0.2533	0.1358	0.9683	0.5801	0.9098	0.0064	0.2608	0.3791	0.6317	0.2183	0.7921		0.7067	0.9742	0.8391	1.1094	0.9701	0.5743	1.366	1.2377		71	93	88	100	81	50
	3025		Sphingolipid Synthesis	sphinganine	LC/MS pos late	17769	C00836	HMDB0000269	3126					1.04942	1.17	0.94	0.93	1.16		0.9798	0.8346	0.5157	0.6186	0.543	0.9683	0.3998	0.8592	0.9748	0.8575	0.6614	0.7405	0.6703	0.9652		0.8964	0.9006	0.8285	0.9728	0.9364	0.9643	0.9086	0.9407		57	71	63	83	62	50
	3026			sphinganine-1-phosphate	LC/MS pos late	52605		HMDB0001383	520					1.20018	1.09	1.36	0.87	0.69		0.1754	0.4958	0.3822	0.5683	0.379	0.9683	0.9967	0.9453	0.1919	0.6003	0.7135	0.75	0.1364	0.7608		1.136	1.4021	1.3428	1.4613	1.0973	0.9292	1.2655	1.3634		100	100	100	100	100	100
	3027			sphingadienine	LC/MS pos late	57426			6449795					0.565983	0.58	0.55	1.37	1.44		0.4635	0.697	0.2433	0.4937	0.961	0.978	0.4124	0.8592	0.3991	0.7045	0.5571	0.6942	0.6453	0.955		1.658	1.0758	1.3584	0.7932	1.5206	1.9576	1.0836	0.9384		57	50	50	50	67	67
	3034		Dihydroceramides	N-palmitoyl-sphinganine (d18:0/16:0)	LC/MS pos late	52604		HMDB11760	5283572					0.925306	0.81	1.07	1.02	0.78		0.2783	0.5945	0.4434	0.5945	0.3615	0.9683	0.2621	0.7909	0.9113	0.8491	0.8951	0.7951	0.1832	0.7608		1.0523	1.0718	1.182	0.9617	0.9542	0.9227	0.9857	0.9737		100	100	100	100	100	100
	3037			N-stearoyl-sphinganine (d18:0/18:0)*	LC/MS pos late	1759		HMDB0011761	5283573					0.819233	0.58	1.21	1.3	0.62		0.8581	0.8165	0.1818	0.4558	0.1715	0.9683	0.0731	0.666	0.98	0.8575	0.3674	0.6317	0.2974	0.8396		1.2978	1.2645	1.6041	0.9249	1.0965	0.9915	1.2016	1.0632		100	93	100	83	100	100
	3046		Ceramides	N-palmitoyl-sphingosine (d18:1/16:0)	LC/MS pos late	44877		HMDB0004949	5283564					0.907567	0.84	0.98	1.03	0.88		0.5212	0.722	0.2168	0.4799	0.555	0.9683	0.2221	0.785	0.622	0.7665	0.9691	0.811	0.4098	0.878		1.0678	1.0457	1.1343	0.9571	0.9912	1.0013	0.9811	0.9691		100	100	100	100	100	100
	3050			N-stearoyl-sphingosine (d18:1/18:0)*	LC/MS pos late	54979		HMDB0004950	5283565					0.800818	0.62	1.07	1.18	0.68		0.7414	0.7817	0.1239	0.4204	0.1797	0.9683	0.0564	0.6604	0.8764	0.8441	0.4415	0.649	0.2613	0.8277		1.1738	1.1289	1.3942	0.8635	0.9849	0.9533	1.0164	0.94		100	100	100	100	100	100
	3056			N-palmitoyl-sphingadienine (d18:2/16:0)*	LC/MS pos late	57416		HMDB0240686						0.90056	0.93	0.87	0.88	0.95		0.5835	0.743	0.2682	0.5032	0.6434	0.9683	0.6611	0.9186	0.2407	0.644	0.4494	0.6515	0.9541	1		1.072	1.0609	1.0974	1.0244	0.9764	1.0465	0.9064	0.9654		100	100	100	100	100	100
	3057			N-stearoyl-sphingadienine (d18:2/18:0)*	LC/MS pos late	57417		HMDB0240362	132282053					0.823452	0.65	1.11	1.02	0.6		0.2835	0.5998	0.1471	0.4379	0.0851	0.9683	0.0361	0.6452	0.8283	0.8351	0.6098	0.7253	0.0634	0.7604		1.1368	1.1739	1.4203	0.9275	0.8989	0.8532	0.9447	0.9361		100	100	100	100	100	100
	3068			N-palmitoyl-heptadecasphingosine (d17:1/16:0)*	LC/MS pos late	57430		HMDB0240685						0.907402	0.87	0.95	0.94	0.87		0.6105	0.7472	0.3515	0.5566	0.6994	0.9717	0.3771	0.8566	0.6794	0.787	0.926	0.8031	0.5485	0.9291		1.0983	1.1018	1.1761	1.0275	0.9931	1.0205	0.9657	0.9966		100	100	100	100	100	100
	3072			ceramide (d18:1/14:0, d16:1/16:0)*	LC/MS pos late	57432		HMDB0011773 HMDB0240681						1.16242	1.41	0.95	0.77	1.15		0.6713	0.7662	0.4464	0.5956	0.1779	0.9683	0.1593	0.7544	0.6519	0.7814	0.1851	0.5485	0.5285	0.921		0.9217	1.0335	0.8593	1.2078	0.9596	0.9841	0.935	1.0714		100	100	100	100	95	100
	3073			ceramide (d18:1/17:0, d17:1/18:0)*	LC/MS pos late	57434		HMDB0240678 HMDB0240683						0.842252	0.67	1.08	1.18	0.73		0.895	0.8263	0.2606	0.5019	0.2676	0.9683	0.1372	0.7398	0.9898	0.8587	0.4608	0.6598	0.4038	0.878		1.11	1.0705	1.2824	0.8586	0.9744	0.9377	1.0112	0.9349		100	100	100	100	95	100
	3075			ceramide (d18:1/20:0, d16:1/22:0, d20:1/18:0)*	LC/MS pos late	57440		HMDB0240684 HMDB0004951 HMDB0240682						0.972063	0.86	1.1	1.17	0.91		0.5989	0.743	0.6685	0.6683	0.3324	0.9683	0.3492	0.841	0.6815	0.787	0.2642	0.5953	0.7632	0.9875		1.1025	1.0718	1.155	0.9885	1.1025	1.0501	1.1548	1.0717		100	100	100	100	100	100
	3076			ceramide (d16:1/24:1, d18:1/22:1)*	LC/MS pos late	57437								1.03707	0.93	1.15	1.16	0.95		0.4875	0.7132	0.9691	0.7482	0.5042	0.9683	0.6349	0.9145	0.6364	0.776	0.3092	0.6121	0.9857	1		1.0358	1.029	1.0646	0.9935	1.081	1.007	1.1549	1.0742		100	100	100	100	100	100
	3077			ceramide (d18:2/24:1, d18:1/24:2)*	LC/MS pos late	57443		HMDB0240679 HMDB0240680						0.860659	0.83	0.9	0.93	0.85		0.4282	0.6809	0.2588	0.5006	0.9153	0.978	0.4053	0.8592	0.44	0.7133	0.6056	0.7246	0.546	0.9291		1.0564	1.0415	1.1407	0.9424	0.924	0.972	0.876	0.9092		100	100	100	100	100	100
	3083		Hexosylceramides (HCER)	glycosyl-N-palmitoyl-sphingosine (d18:1/16:0)	LC/MS pos late	53013								0.851139	0.87	0.83	1.08	1.13		0.3702	0.6565	0.1256	0.4204	0.648	0.9683	0.4608	0.8715	0.1371	0.5648	0.7389	0.7577	0.365	0.8621		1.1326	0.9966	1.0643	0.929	1.0999	1.2009	0.999	0.964		100	100	100	100	100	100
	3084			glycosyl-N-stearoyl-sphingosine (d18:1/18:0)	LC/MS pos late	52234								0.788703	0.72	0.86	1.16	0.97		0.713	0.7761	0.0528	0.3184	0.8828	0.9757	0.1569	0.7508	0.1718	0.5888	0.6992	0.7459	0.8823	0.9965		1.2428	1.0826	1.2588	0.9063	1.1403	1.2267	1.054	0.9802		100	100	100	100	100	100
	3086			glycosyl-N-behenoyl-sphingosine (d18:1/22:0)*	LC/MS pos late	57371								0.904229	1.01	0.83	1.13	1.39		0.056	0.333	0.3407	0.5497	0.2709	0.9683	0.9187	0.9453	0.1274	0.5537	0.5216	0.6821	0.0455	0.7338		1.0807	0.9119	0.9062	0.9175	1.146	1.2551	1.0368	0.9772		100	100	100	100	100	100
	3089			glycosyl-N-nervonoyl-sphingosine (d18:1/24:1)*	LC/MS pos late	57369		HMDB0010712 HMDB0004975	53480656;20057357					0.69377	0.77	0.63	0.91	1.12		0.9388	0.8342	0.0061	0.1631	0.176	0.9683	0.3046	0.8104	0.0028	0.2381	0.3344	0.6229	0.3343	0.8563		1.4672	1.2258	1.3849	1.0666	1.2593	1.5494	0.9692	1.0179		100	100	100	100	100	100
	3090			glycosyl-N-(2-hydroxynervonoyl)-sphingosine (d18:1/24:1(2OH))*	LC/MS pos late	57444								0.773772	0.62	1	1.12	0.68		0.6145	0.7499	0.308	0.5304	0.5588	0.9683	0.2834	0.7934	0.7405	0.8092	0.9513	0.8091	0.4662	0.8977		1.3619	1.3063	1.6168	0.9959	1.1094	1.107	1.1118	1.0538		100	100	100	100	100	100
	3094			glycosyl-N-behenoyl-sphingadienine (d18:2/22:0)*	LC/MS pos late	57421								0.793616	0.91	0.71	1.07	1.38		0.1533	0.4851	0.1245	0.4204	0.3518	0.9683	0.6739	0.9186	0.0677	0.4655	0.7001	0.7459	0.1162	0.7608		1.1779	0.9462	0.9889	0.9036	1.1664	1.3669	0.9659	0.9348		100	100	100	100	100	100
	3095			glycosyl-N-tricosanoyl-sphingadienine (d18:2/23:0)*	LC/MS pos late	57445								0.739312	0.89	0.63	1.03	1.44		0.3733	0.6565	0.085	0.3726	0.1891	0.9683	0.7715	0.9278	0.0258	0.3632	0.744	0.7597	0.142	0.7608		1.2467	0.9662	1.0228	0.9096	1.2022	1.4707	0.9338	0.9217		100	100	100	100	100	100
	3104			glycosyl ceramide (d18:1/20:0, d16:1/22:0)*	LC/MS pos late	57595								0.861871	0.92	0.81	1.05	1.2		0.4006	0.6658	0.1918	0.4671	0.4747	0.9683	0.6848	0.9194	0.1328	0.5602	0.9237	0.8031	0.2986	0.8401		1.2025	1.0512	1.0934	1.009	1.1877	1.3116	1.0638	1.0364		100	100	100	100	100	100
	3107			glycosyl ceramide (d18:1/23:1, d17:1/24:1)*	LC/MS pos late	57448								0.664841	0.71	0.62	0.9	1.02		0.302	0.6127	0.127	0.4239	0.6618	0.9683	0.4556	0.8701	0.1419	0.5717	0.272	0.6057	0.6862	0.9697		1.3143	1.1118	1.3015	0.922	1.0763	1.3271	0.8255	0.8738		93	100	100	100	86	83
	3108			glycosyl ceramide (d18:2/24:1, d18:1/24:2)*	LC/MS pos late	57453								0.631456	0.66	0.6	0.85	0.93		0.4001	0.6658	0.0018	0.1476	0.3975	0.9683	0.0972	0.7173	0.0032	0.2381	0.2089	0.559	0.9975	1		1.4967	1.2848	1.5479	1.0216	1.157	1.4456	0.8685	0.9451		100	100	100	100	100	100
	3113		Lactosylceramides (LCER)	lactosyl-N-palmitoyl-sphingosine (d18:1/16:0)	LC/MS pos late	53010		HMDB0006750	53477895					0.890598	0.87	0.91	0.83	0.79		0.0211	0.2868	0.1939	0.4697	0.9748	0.9807	0.3914	0.8592	0.3157	0.6781	0.0744	0.478	0.1178	0.7608		1.0923	1.1431	1.2209	1.0652	0.922	0.9637	0.8803	0.9728		100	100	100	100	100	100
	3116			lactosyl-N-behenoyl-sphingosine (d18:1/22:0)*	LC/MS pos late	57422		HMDB0011594	44260143					0.727913	0.78	0.68	0.89	1.02		0.5373	0.7265	0.0341	0.2907	0.722	0.9748	0.2219	0.785	0.0625	0.4636	0.4666	0.6607	0.8601	0.9953		1.2643	1.1131	1.2504	0.9758	1.0715	1.2783	0.8648	0.9203		100	100	100	100	100	100
	3117			lactosyl-N-nervonoyl-sphingosine (d18:1/24:1)*	LC/MS pos late	57370		HMDB0004872						0.613727	0.7	0.52	0.75	1.01		0.295	0.6094	0.0006	0.1476	0.1731	0.9683	0.114	0.7227	0.0005	0.1139	0.0747	0.478	0.8267	0.9953		1.559	1.3246	1.5542	1.0951	1.1912	1.5638	0.8186	0.9568		100	100	100	100	100	100
	3124		Dihydrosphingomyelins	myristoyl dihydrosphingomyelin (d18:0/14:0)*	LC/MS pos late	57365		HMDB0012085	44260138					0.820767	0.84	0.8	0.89	0.93		0.3585	0.6551	0.0796	0.3547	0.5965	0.9683	0.3981	0.8592	0.0882	0.4969	0.2796	0.6091	0.7917	0.9875		1.1711	1.1148	1.2137	1.016	1.0174	1.1285	0.9063	0.9612		100	100	100	100	100	100
	3125			palmitoyl dihydrosphingomyelin (d18:0/16:0)*	LC/MS pos late	52434		HMDB0010168	9939965					0.837708	0.83	0.85	0.92	0.9		0.1512	0.4842	0.0074	0.1767	0.9477	0.978	0.0583	0.6604	0.0441	0.4259	0.3	0.6091	0.3102	0.8421		1.143	1.0987	1.2007	0.9966	1.0019	1.0853	0.9184	0.9575		100	100	100	100	100	100
	3126			behenoyl dihydrosphingomyelin (d18:0/22:0)*	LC/MS pos late	57331		HMDB0012091	44260132					1.03697	0.91	1.21	1	0.75		0.2585	0.573	0.8204	0.7075	0.3089	0.9683	0.5927	0.9132	0.3506	0.6963	0.931	0.8031	0.1527	0.7608		1.1578	1.2629	1.3258	1.2	1.0955	0.9897	1.2012	1.2006		100	100	100	100	100	100
	3127			sphingomyelin (d18:0/18:0, d19:0/17:0)*	LC/MS pos late	57473		HMDB0012087	44260130					0.738661	0.58	0.99	1.07	0.63		0.3277	0.63	0.0736	0.3514	0.1321	0.9683	0.0296	0.6452	0.8203	0.8318	0.6816	0.7431	0.0983	0.7608		1.2964	1.2576	1.5916	0.9236	0.9963	1.0011	0.9916	0.9576		100	100	100	100	100	100
	3128			sphingomyelin (d18:0/20:0, d16:0/22:0)*	LC/MS pos late	57476		HMDB0012090						0.934713	0.8	1.11	1.04	0.76		0.4006	0.6658	0.4343	0.5929	0.2964	0.9683	0.2229	0.785	0.8409	0.8351	0.876	0.7933	0.2086	0.7852		1.0967	1.1259	1.2492	1.0027	0.9958	0.9442	1.0475	1.0251		100	100	100	100	100	100
	3129		Sphingomyelins	palmitoyl sphingomyelin (d18:1/16:0)	LC/MS pos late	37506		HMDB0010169	9939941					0.870944	0.84	0.9	0.99	0.93		0.4058	0.6676	0.0045	0.1583	0.5318	0.9683	0.0187	0.6452	0.0775	0.4767	0.8757	0.7933	0.3301	0.8528		1.1065	1.0558	1.1454	0.9662	1.0144	1.0675	0.9613	0.9637		100	100	100	100	100	100
	3130			hydroxypalmitoyl sphingomyelin (d18:1/16:0(OH))**	LC/MS pos late	62851								0.7549	0.79	0.72	0.9	0.98		0.5843	0.743	0.0058	0.1631	0.5451	0.9683	0.1253	0.7227	0.0117	0.2762	0.3891	0.6317	0.9687	1		1.2142	1.0937	1.2241	0.9633	1.0371	1.2043	0.8699	0.9166		100	100	100	100	100	100
	3131			stearoyl sphingomyelin (d18:1/18:0)	LC/MS pos late	19503	C00550	HMDB0001348	6453725					0.865386	0.73	1.03	1.1	0.78		0.7367	0.7811	0.2743	0.5063	0.2222	0.9683	0.1237	0.7227	0.9214	0.8491	0.5016	0.6731	0.2959	0.8391		1.0623	1.0346	1.1932	0.8759	0.947	0.9314	0.9626	0.9193		93	93	88	100	100	100
	3132			behenoyl sphingomyelin (d18:1/22:0)*	LC/MS pos late	48492		HMDB0012103	44260125					1.04	0.98	1.1	1.03	0.92		0.7048	0.776	0.6377	0.6631	0.4343	0.9683	0.8333	0.9333	0.3491	0.6963	0.7607	0.7662	0.4368	0.8882		0.9951	1.028	1.0367	1.0194	1.002	0.9536	1.0504	1.0349		100	100	100	100	100	100
	3133			tricosanoyl sphingomyelin (d18:1/23:0)*	LC/MS pos late	52436		HMDB0012105						1.05795	1.08	1.04	0.77	0.8		0.0024	0.149	0.4284	0.5906	0.8948	0.9776	0.5348	0.8958	0.6193	0.7658	0.0148	0.3361	0.0413	0.7238		1.0164	1.1706	1.1278	1.2135	0.921	0.905	0.9371	1.0753		100	100	100	100	100	100
	3134			lignoceroyl sphingomyelin (d18:1/24:0)	LC/MS pos late	57330		HMDB0011697						0.998233	0.97	1.03	0.99	0.94		0.5392	0.728	0.9322	0.7446	0.749	0.9752	0.7858	0.9328	0.86	0.8417	0.8246	0.7817	0.5313	0.9215		1.0185	1.0359	1.0506	1.0213	0.9993	0.9865	1.0121	1.0167		100	100	100	100	100	100
	3135			sphingomyelin (d18:2/18:1)*	LC/MS pos late	57474		HMDB0001348	52931155					0.804816	0.71	0.94	0.92	0.7		0.0268	0.2868	0.0394	0.2939	0.1674	0.9683	0.0231	0.6452	0.5845	0.7562	0.4991	0.6731	0.0176	0.6553		1.1712	1.1783	1.3756	0.9811	0.9354	0.9667	0.9042	0.9426		100	100	100	100	100	100
	3136			sphingomyelin (d18:2/23:1)*	LC/MS pos late	57482		HMDB0240668						0.745049	0.72	0.78	0.77	0.71		0.0185	0.2868	0.0359	0.2939	0.9253	0.978	0.1349	0.7398	0.1255	0.5512	0.0825	0.4994	0.0932	0.7608		1.2069	1.2148	1.4135	1.016	0.8914	1.0003	0.7825	0.8992		100	100	100	100	100	100
	3137			sphingomyelin (d18:2/24:2)*	LC/MS pos late	57479		HMDB0240644						0.758758	0.82	0.69	0.73	0.86		0.0345	0.3019	0.0194	0.24	0.4334	0.9683	0.2703	0.7934	0.0203	0.3322	0.0314	0.4109	0.3491	0.8621		1.2846	1.2554	1.3832	1.1275	1.0039	1.1859	0.8219	0.9747		100	100	100	100	100	100
	3138			sphingomyelin (d17:1/14:0, d16:1/15:0)*	LC/MS pos late	62152								0.948191	1.04	0.84	0.7	0.86		0.0567	0.333	0.5485	0.6245	0.4894	0.9683	0.9507	0.9453	0.3349	0.6951	0.0533	0.4717	0.3972	0.878		1.0307	1.1279	1.1064	1.1494	0.8802	0.955	0.8053	0.9773		100	100	100	100	100	100
	3139			sphingomyelin (d18:1/14:0, d16:1/16:0)*	LC/MS pos late	42463		HMDB0012097	11433862					0.919463	0.96	0.88	0.9	0.98		0.4583	0.6967	0.2666	0.5032	0.4538	0.9683	0.8042	0.9333	0.1663	0.5888	0.2662	0.5972	0.996	1		1.043	1.0319	1.0553	1.0084	0.9701	1.0306	0.9096	0.959		100	100	100	100	100	100
	3140			sphingomyelin (d18:2/14:0, d18:1/14:1)*	LC/MS pos late	47154		HMDB0240637 HMDB0240612						0.850251	0.98	0.71	0.66	0.91		0.0007	0.09	0.0159	0.237	0.0146	0.8182	0.9805	0.9453	0.0006	0.1139	4.4241e-05	0.0267	0.4435	0.8925		1.1753	1.2177	1.2284	1.2071	0.9568	1.1222	0.7915	0.9993		100	100	100	100	100	100
	3141			sphingomyelin (d17:1/16:0, d18:1/15:0, d16:1/17:0)*	LC/MS pos late	52433		HMDB0240608 HMDB0240617						0.851236	0.79	0.93	1.01	0.86		0.4926	0.7172	0.061	0.335	0.3466	0.9683	0.0609	0.666	0.464	0.7202	0.8459	0.7865	0.2769	0.8294		1.1125	1.0688	1.1969	0.9406	0.9907	1.028	0.9534	0.947		100	100	100	100	100	100
	3142			sphingomyelin (d17:2/16:0, d18:2/15:0)*	LC/MS pos late	57483		HMDB0240677						0.791269	0.74	0.86	0.86	0.75		0.0727	0.3566	0.0603	0.335	0.4834	0.9683	0.0843	0.6904	0.3595	0.6963	0.3955	0.6317	0.095	0.7608		1.2164	1.2147	1.3941	1.0352	0.9643	1.0387	0.8898	0.9625		100	100	100	100	100	100
	3143			sphingomyelin (d18:2/16:0, d18:1/16:1)*	LC/MS pos late	42459		HMDB0240613 HMDB0240638						0.809308	0.75	0.88	0.99	0.85		0.2311	0.5511	0.0055	0.1631	0.2708	0.9683	0.0098	0.6452	0.1725	0.5888	0.9405	0.806	0.1262	0.7608		1.1474	1.0866	1.24	0.9333	0.9894	1.0549	0.924	0.9286		100	100	100	100	100	100
	3144			sphingomyelin (d18:1/17:0, d17:1/18:0, d19:1/16:0)	LC/MS pos late	52615		HMDB0240609 HMDB0240622 HMDB0240620	46891763					0.881462	0.82	0.95	1.07	0.92		0.9807	0.8346	0.2674	0.5032	0.5742	0.9683	0.2636	0.7914	0.6765	0.787	0.6599	0.7405	0.7179	0.983		1.0503	0.996	1.0955	0.8965	0.9801	1.0052	0.9551	0.9258		93	93	88	100	100	100
	3145			sphingomyelin (d18:1/18:1, d18:2/18:0)	LC/MS pos late	37529		HMDB0012101	6443882					0.812945	0.72	0.93	1.02	0.8		0.524	0.724	0.0691	0.3448	0.3338	0.9683	0.0639	0.666	0.504	0.731	0.802	0.7794	0.2837	0.8317		1.1387	1.0931	1.2682	0.9179	0.9713	1.0091	0.9335	0.9257		93	93	88	100	100	100
	3146			sphingomyelin (d18:1/19:0, d19:1/18:0)*	LC/MS pos late	57475								0.920089	0.82	1.05	1.01	0.8		0.2475	0.5626	0.4294	0.5912	0.2057	0.9683	0.1702	0.7773	0.7148	0.7978	0.9325	0.8031	0.1075	0.7608		0.9861	0.9995	1.0983	0.9008	0.8939	0.8739	0.9138	0.9073		100	100	100	100	100	100
	3147			sphingomyelin (d18:1/20:0, d16:1/22:0)*	LC/MS pos late	48490		HMDB0012102	44260124					0.952623	0.89	1.03	1.03	0.89		0.5652	0.743	0.4299	0.5912	0.2098	0.9683	0.1727	0.7786	0.7208	0.801	0.6036	0.7237	0.221	0.7933		1.0216	1.0184	1.0796	0.9571	0.9765	0.9636	0.9893	0.9732		100	100	100	100	100	100
	3148			sphingomyelin (d18:1/20:1, d18:2/20:0)*	LC/MS pos late	48491		HMDB0240610 HMDB0240632						0.832796	0.77	0.91	1.01	0.86		0.5375	0.7265	0.0916	0.3768	0.5085	0.9683	0.1161	0.7227	0.4275	0.7092	0.9731	0.811	0.3926	0.878		1.0849	1.035	1.1688	0.9011	0.9535	1.001	0.906	0.9035		93	93	88	100	100	100
	3149			sphingomyelin (d18:1/20:2, d18:2/20:1, d16:1/22:2)*	LC/MS pos late	57481								0.738607	0.72	0.76	0.75	0.72		0.0183	0.2868	0.0225	0.2487	0.9636	0.978	0.1106	0.7227	0.087	0.4947	0.0764	0.4812	0.0989	0.7608		1.1718	1.1753	1.3637	0.9868	0.862	0.9798	0.7442	0.8655		100	100	100	100	100	100
	3150			sphingomyelin (d18:1/21:0, d17:1/22:0, d16:1/23:0)*	LC/MS pos late	52495		HMDB0240621 HMDB0240611 HMDB0240619						1.07731	1.06	1.1	0.89	0.87		0.1179	0.434	0.3516	0.5566	0.8772	0.9757	0.5999	0.9145	0.415	0.7092	0.2845	0.6091	0.2457	0.8207		0.9817	1.0846	1.0522	1.1169	0.9548	0.9111	0.9984	1.0576		100	100	100	100	100	100
	3151			sphingomyelin (d18:2/21:0, d16:2/23:0)*	LC/MS pos late	57480		HMDB0240676						0.874514	0.82	0.95	0.84	0.72		0.0081	0.2242	0.2353	0.4866	0.4369	0.9683	0.1899	0.785	0.7533	0.8156	0.1359	0.507	0.0213	0.6572		1.1069	1.1681	1.2852	1.051	0.9068	0.9287	0.8849	0.968		100	100	100	100	100	100
	3152			sphingomyelin (d18:1/22:1, d18:2/22:0, d16:1/24:1)*	LC/MS pos late	48493		HMDB0012104						0.918985	0.91	0.93	0.94	0.91		0.188	0.51	0.1654	0.455	0.8374	0.9752	0.2833	0.7934	0.3697	0.6963	0.3994	0.6317	0.3055	0.8407		1.0603	1.0585	1.1101	1.007	0.9761	1.0104	0.9418	0.9744		100	100	100	100	100	100
	3153			sphingomyelin (d18:1/22:2, d18:2/22:1, d16:1/24:2)*	LC/MS pos late	57477		HMDB0240672 HMDB0240670 HMDB0240669						0.800476	0.83	0.77	0.78	0.85		0.0651	0.3451	0.0573	0.3288	0.5651	0.9683	0.3574	0.8451	0.0645	0.4651	0.0709	0.4717	0.3788	0.8733		1.1758	1.1645	1.274	1.055	0.9525	1.0776	0.8274	0.9412		100	100	100	100	100	100
	3154			sphingomyelin (d18:2/23:0, d18:1/23:1, d17:1/24:1)*	LC/MS pos late	52435		HMDB0240634 HMDB0011696 HMDB0240614	134757653					0.885328	0.91	0.85	0.79	0.85		0.0054	0.1975	0.0748	0.3522	0.5646	0.9683	0.4039	0.8592	0.0785	0.4774	0.0116	0.2852	0.1157	0.7608		1.0953	1.133	1.1856	1.0805	0.932	1.0051	0.8589	0.9697		100	100	100	100	100	100
	3155			sphingomyelin (d18:1/24:1, d18:2/24:0)*	LC/MS pos late	47153		HMDB0012107	44260126					0.821315	0.84	0.8	0.86	0.9		0.0248	0.2868	0.0011	0.1476	0.629	0.9683	0.0456	0.6452	0.0045	0.2434	0.0408	0.4273	0.219	0.7921		1.1635	1.1265	1.2271	1.0258	0.9926	1.0998	0.8853	0.9556		100	100	100	100	100	100
	3156			sphingomyelin (d18:2/24:1, d18:1/24:2)*	LC/MS pos late	52437		HMDB0240636 HMDB0240615	85336023					0.790409	0.81	0.77	0.8	0.84		0.0073	0.2103	0.0025	0.1476	0.5977	0.9683	0.0732	0.666	0.0073	0.2651	0.0157	0.3388	0.1266	0.7608		1.2157	1.1947	1.3209	1.0685	0.982	1.1105	0.8534	0.9609		100	100	100	100	100	100
	3157			sphingomyelin (d18:1/25:0, d19:0/24:1, d20:1/23:0, d19:1/24:0)*	LC/MS pos late	57478		HMDB0240671 HMDB0240675 HMDB0240673 HMDB0240674						1.2003	1.24	1.16	0.91	0.98		0.6016	0.743	0.2671	0.5032	0.9017	0.9776	0.4064	0.8592	0.4564	0.7202	0.6283	0.7321	0.7887	0.9875		0.9316	1.0561	0.942	1.1701	0.9938	0.9212	1.0664	1.1182		100	100	100	100	100	100
	3160		Ceramide PEs	palmitoyl-sphingosine-phosphoethanolamine (d18:1/16:0)	LC/MS pos late	62984								0.823837	0.82	0.83	1.05	1.03		0.5699	0.743	0.02	0.24	0.9661	0.978	0.1161	0.7227	0.0708	0.4655	0.6929	0.7445	0.6817	0.9684		1.1268	1.0073	1.1094	0.9052	1.0478	1.1443	0.9514	0.9283		100	100	100	100	100	100
	3185		Sphingosines	sphingosine	LC/MS pos late	17747	C00319	HMDB0000252	5280335					1.11843	1.11	1.13	1.04	1.02		0.8403	0.8098	0.3902	0.5708	0.8117	0.9752	0.675	0.9186	0.4108	0.7092	0.978	0.8121	0.768	0.9875		1.1374	1.1865	1.1255	1.2476	1.2229	1.1493	1.2966	1.2721		86	93	88	100	90	83
	3187			sphingosine 1-phosphate	LC/MS pos late	34445	C06124	HMDB0000277	5283560					1.18347	1.07	1.35	0.87	0.69		0.1561	0.4914	0.4134	0.5843	0.3891	0.9683	0.9764	0.9453	0.2111	0.6159	0.6665	0.7408	0.1286	0.7608		1.0198	1.2466	1.2054	1.2877	0.9801	0.8341	1.126	1.2069		100	100	100	100	100	100
	3201		Mevalonate Metabolism	3-hydroxy-3-methylglutarate	LC/MS polar	531	C03761	HMDB0000355	1662;5459993					1.27083	1.6	1.01	0.8	1.26		0.787	0.7976	0.3012	0.5261	0.1653	0.9683	0.1073	0.7227	0.7835	0.8227	0.3957	0.6317	0.2647	0.8277		1.0213	1.1755	0.9057	1.4452	1.1437	1.1369	1.1506	1.2979		100	100	100	100	100	100
	3218		Sterol	cholesterol	LC/MS pos late	63	C00187	HMDB0000067	6432564;11025495;5997					0.898019	0.88	0.92	0.96	0.92		0.259	0.5731	0.0717	0.3499	0.8593	0.9757	0.1802	0.7797	0.2154	0.6188	0.4719	0.6608	0.3796	0.8733		1.1002	1.0791	1.1477	1.0106	1.009	1.0527	0.9653	0.988		100	100	100	100	100	100
	3219			cholesterol sulfate	LC/MS polar	35324	C18043	HMDB00653 HMDB0000653	65076					1.00202	0.98	1.02	1.44	1.39		0.0007	0.09	0.9338	0.7446	0.9904	0.9807	0.962	0.9453	0.9432	0.8511	0.0084	0.268	0.0165	0.6553		1.0406	0.8632	0.8703	0.8561	1.2202	1.211	1.2293	1.0427		100	100	100	100	100	100
	3232			7alpha-hydroxy-3-oxo-4-cholestenoate (7-Hoca)	LC/MS neg	36776	C17337	HMDB0012458	3081085					1.04258	1.04	1.04	1.01	1.01		0.779	0.7934	0.6712	0.6684	0.8953	0.9776	0.844	0.9333	0.6767	0.787	0.7573	0.7662	0.9203	1		0.9817	0.9962	0.9764	1.016	1.0089	0.9869	1.031	1.0235		100	100	100	100	100	100
	3234			3beta,7alpha-dihydroxy-5-cholestenoate	LC/MS neg	36803	C17335	HMDB0012454	3081084					0.964014	0.69	1.46	1.16	0.55		0.3112	0.6205	0.9496	0.7446	0.0854	0.9683	0.2593	0.7909	0.1774	0.589	0.5793	0.7126	0.0692	0.7604		0.9059	0.9891	1.1704	0.8078	0.7901	0.6415	0.9388	0.8733		93	100	100	100	90	83
	3235			3beta-hydroxy-5-cholestenoate	LC/MS neg	54805	C17333	HMDB0012453	165511					0.91059	0.95	0.88	1.06	1.15		0.6374	0.7553	0.8153	0.7058	0.9385	0.978	0.9164	0.9453	0.8158	0.8306	0.7671	0.769	0.7128	0.9806		1.0793	0.979	1.0058	0.9521	1.0831	1.1527	1.0135	0.9828		100	100	100	100	100	100
	3245			4-cholesten-3-one	LC/MS pos late	38125	C00599	HMDB0000921	91477					1.03233	1.05	1.02	0.99	1.02		0.9611	0.8346	0.6704	0.6684	0.8393	0.9752	0.6735	0.9186	0.8669	0.8434	0.8503	0.7865	0.9177	1		1.0177	1.0305	1.0071	1.0539	1.0378	1.0283	1.0473	1.0506		100	100	100	100	100	100
	3247			beta-sitosterol	LC/MS pos late	27414	C01753	HMDB0000852	222284					1.03122	1.67	0.66	0.67	1.7		0.6011	0.743	0.954	0.745	0.0224	0.8525	0.1256	0.7227	0.0743	0.4655	0.1693	0.5413	0.0581	0.7604		1.3901	1.3732	1.0305	1.716	1.4504	1.7497	1.1511	1.4335		93	93	88	100	100	100
	3250			campesterol	LC/MS pos late	33997	C01789	HMDB0002869	173183					0.939701	1.57	0.63	0.81	2.02		0.3776	0.6567	0.9631	0.7473	0.0206	0.8525	0.1186	0.7227	0.0717	0.4655	0.2556	0.5908	0.0326	0.7032		1.3234	1.127	0.8768	1.3772	1.44	1.77	1.11	1.2436		100	100	100	100	100	100
	3273		Pregnenolone Steroids	pregnenolone sulfate	LC/MS neg	38170	C18044	HMDB0000774	105074					0.670279	0.57	0.72	2.54	1.99		0.0197	0.2868	0.3683	0.5615	0.8616	0.9757	0.6244	0.9145	0.4204	0.7092	0.0967	0.507	0.0869	0.7608		2.0393	1.068	1.3635	0.7725	2.3382	2.715	1.9613	1.3669		100	100	100	100	100	100
	3277			17alpha-hydroxypregnenolone 3-sulfate	LC/MS neg	37482		HMDB00416	152971					0.615194	0.31	0.87	3.48	1.22		0.058	0.3352	0.0727	0.3502	0.2201	0.9683	0.0453	0.6452	0.6523	0.7814	0.0218	0.3835	0.634	0.955		1.0491	0.6156	0.9433	0.288	1.0789	1.1549	1.0029	0.6454		71	64	75	50	76	67
	3278			17alpha-hydroxypregnanolone glucuronide	LC/MS neg	47403								1.05333	0.63	1.29	3.63	1.77		4.1373e-06	0.0051	0.705	0.6815	0.0729	0.9683	0.1433	0.7398	0.2773	0.6561	4.1512e-06	0.005	0.0182	0.6553		1.0144	0.5966	0.7318	0.4614	1.4863	1.297	1.6757	1.0685		100	100	100	100	100	100
	3280			21-hydroxypregnenolone monosulfate (1)	LC/MS neg	37174			174681					0.780193	0.78	0.78	1.59	1.6		0.0174	0.2868	0.1697	0.455	0.8311	0.9752	0.4305	0.8612	0.2333	0.6358	0.0948	0.507	0.0769	0.7604		0.6947	0.4765	0.5351	0.4179	0.7602	0.8544	0.6661	0.542		50	21	38	0	52	67
	3281			21-hydroxypregnenolone monosulfate (2)	LC/MS neg	37175			10670474					0.732909	0.85	0.69	2.18	2.68		0.0187	0.2868	0.7826	0.6984	0.8208	0.9752	0.7362	0.9224	0.9704	0.8569	0.0508	0.4717	0.1408	0.7608		0.6597	0.3313	0.3587	0.3039	0.8119	0.9607	0.6631	0.4835		29	7	13	0	52	50
	3283			21-hydroxypregnenolone disulfate	LC/MS neg	46115			134595					0.758927	0.67	0.83	1.75	1.41		0.1017	0.4043	0.2274	0.4828	0.9614	0.978	0.4336	0.8647	0.3444	0.6963	0.2286	0.58	0.2533	0.8236		1.3975	0.9641	1.1579	0.7704	1.4939	1.6372	1.3507	1.0606		100	100	100	100	100	100
	3289			pregnenediol sulfate (C21H34O5S)*	LC/MS neg	32619	C18044	HMDB0000774	105074					0.774629	0.79	0.77	2.29	2.35		0.0049	0.1975	0.4206	0.5902	0.6028	0.9683	0.8468	0.9333	0.322	0.6812	0.0698	0.4717	0.0234	0.6722		2.0535	1.0966	1.2274	0.9657	2.5477	2.8796	2.2157	1.5907		100	100	100	100	100	100
	3290			pregnenediol disulfate (C21H34O8S2)*	LC/MS neg	32562								0.768885	0.61	0.84	3.19	2.3		0.0005	0.09	0.221	0.4808	0.912	0.978	0.3685	0.846	0.4001	0.7045	0.0054	0.2344	0.017	0.6553		1.4006	0.6816	0.8488	0.5145	1.7958	1.9523	1.6393	1.0769		100	100	100	100	100	100
	3291			pregnenetriol sulfate*	LC/MS neg	62922			129671303					1.00228	0.77	1.12	2.83	1.93		0.0033	0.1662	0.9099	0.7415	0.8058	0.9752	0.8097	0.9333	0.9207	0.8491	0.0152	0.3361	0.0582	0.7604		1.2295	0.7407	0.8386	0.6428	1.721	1.6203	1.8218	1.2323		100	100	100	100	100	100
	3292			pregnenetriol disulfate*	LC/MS neg	62921								0.901951	0.62	1.07	2.87	1.65		0.0054	0.1975	0.5816	0.6344	0.5975	0.9683	0.47	0.8715	0.9861	0.8587	0.0127	0.3055	0.1089	0.7608		1.0556	0.6443	0.7964	0.4921	1.3634	1.3148	1.4121	0.9521		100	100	100	100	100	100
	3300		Progestin Steroids	5alpha-pregnan-3beta-ol,20-one sulfate	LC/MS neg	37480								0.235044	0.14	0.97	0.86	0.13		0.3189	0.6236	0.3863	0.5708	0.4671	0.9683	0.287	0.7937	0.9155	0.8491	0.837	0.7865	0.2496	0.8207		2.6761	2.7139	4.7532	0.6747	0.5912	0.5991	0.5833	0.629		29	21	25	17	29	33
	3301			5alpha-pregnan-3beta,20beta-diol monosulfate (1)	LC/MS neg	37196		HMDB0240580						0.140249	0.09	0.74	0.74	0.09		0.2228	0.54	0.5036	0.6158	0.6542	0.9683	0.4545	0.8701	0.8674	0.8434	0.5569	0.6942	0.2638	0.8277		7.8667	7.8699	14.4682	1.2717	1.1001	1.2653	0.935	1.1033		86	100	100	100	90	67
	3303			5alpha-pregnan-3beta,20alpha-diol monosulfate (1)	LC/MS neg	37199								1	1	1	1	1																	1	1	1	1	1	1	1	1		7	7	13	0	0	0
	3304			5alpha-pregnan-3beta,20alpha-diol monosulfate (2)	LC/MS neg	37200								0.136008	0.09	0.87	0.53	0.06		0.2286	0.5489	0.5354	0.6232	0.7684	0.9752	0.54	0.8969	0.8063	0.8306	0.4902	0.6726	0.3142	0.8429		12.025	12.4388	22.7446	2.1331	1.2217	1.3055	1.1379	1.6355		100	100	100	100	95	100
	3310			5alpha-pregnan-3beta,20alpha-diol disulfate	LC/MS neg	37198		HMDB0094650	118703093					0.122747	0.06	0.95	1.03	0.07		0.7156	0.7761	0.2712	0.5038	0.276	0.9683	0.1449	0.7398	0.9933	0.8588	0.5822	0.7134	0.3296	0.8528		11.4447	11.3906	21.3953	1.3858	1.4589	1.4941	1.4238	1.4048		100	100	100	100	100	100
	3311			5alpha-pregnan-diol disulfate	LC/MS neg	46172		HMDB0240582 HMDB0240581	3082277;5127902					0.117138	0.06	0.8	1.15	0.09		0.5288	0.7265	0.2034	0.4716	0.3787	0.9683	0.1514	0.7449	0.7626	0.8181	0.849	0.7865	0.3126	0.8429		4.1908	4.0906	7.7239	0.4573	0.591	0.6576	0.5244	0.4909		43	29	38	17	33	50
	3313			pregnanediol-3-glucuronide	LC/MS neg	40708		HMDB0010318	123796					0.127389	0.07	0.7	0.9	0.09		0.4416	0.69	0.0503	0.3184	0.5221	0.9683	0.0815	0.684	0.3054	0.6745	0.9218	0.803	0.3459	0.8621		7.43	7.2908	13.5842	0.9973	1.0857	1.2758	0.8956	0.9465		100	93	100	83	95	100
	3335		Corticosteroids	cortisol	LC/MS neg	1712	C00735	HMDB0000063	5754					0.786834	0.73	0.84	1.24	1.08		0.4236	0.6766	0.1374	0.4292	0.4831	0.9683	0.144	0.7398	0.5455	0.7428	0.2627	0.5953	0.9464	1		1.1545	0.9602	1.1085	0.8119	1.1028	1.2006	1.005	0.9084		93	100	100	100	95	83
	3340			tetrahydrocortisol glucuronide	LC/MS neg	64411								0.975911	0.7	1.18	2.26	1.33		0.0117	0.2395	0.7779	0.6979	0.1258	0.9683	0.222	0.785	0.3413	0.6963	0.0032	0.2261	0.4634	0.8977		1.125	0.8194	0.9646	0.6742	1.4035	1.2854	1.5216	1.0979		93	100	100	100	95	83
	3341			tetrahydrocortisol sulfate (1)	LC/MS neg	62793								0.740313	0.7	0.77	1.41	1.28		0.321	0.6247	0.2012	0.4716	0.6723	0.9695	0.2539	0.7909	0.5146	0.7379	0.2899	0.6091	0.6991	0.9742		0.7975	0.5938	0.6982	0.4894	0.794	0.8967	0.6913	0.5904		36	21	38	0	33	33
	3345			cortisone	LC/MS neg	1769	C00762	HMDB0002802	222786					0.979807	0.89	1.06	1.33	1.11		0.1655	0.4944	0.9141	0.7421	0.5195	0.9683	0.7182	0.9215	0.5726	0.7539	0.1304	0.507	0.6097	0.955		0.9954	0.8906	0.9426	0.8386	1.0802	1.0483	1.1121	0.9753		86	93	88	100	95	83
	3353			tetrahydrocortisone glucuronide (5)	LC/MS neg	64591								1.15383	0.81	1.48	1.93	1.05		0.0717	0.355	0.4433	0.5945	0.0602	0.9683	0.4369	0.8659	0.0494	0.4259	0.0075	0.268	0.9546	1		0.8672	0.764	0.8448	0.6832	1.1038	0.8897	1.3179	1.0006		93	100	100	100	95	83
	3356			cortolone glucuronide (1)	LC/MS neg	57699								1.20704	0.88	1.63	1.4	0.76		0.5983	0.743	0.1127	0.4088	0.0591	0.9683	0.828	0.9333	0.0113	0.2728	0.2928	0.6091	0.1047	0.7608		0.895	0.9583	1.0177	0.8988	1.017	0.7722	1.2618	1.0803		100	100	100	100	100	100
	3366		Androgenic Steroids	11-ketoetiocholanolone glucuronide	LC/MS neg	47135								0.903458	0.72	1.15	1.15	0.72		0.6687	0.7662	0.954	0.745	0.376	0.9683	0.5259	0.891	0.5333	0.7407	0.729	0.7545	0.3791	0.8733		1.041	1.0408	1.2081	0.8734	0.9407	0.8738	1.0076	0.9405		86	100	100	100	86	67
	3367			dehydroepiandrosterone sulfate (DHEA-S)	LC/MS neg	32425	C04555	HMDB0001032	12594					0.725621	0.63	0.79	1.84	1.48		0.1261	0.4469	0.3691	0.5615	0.7017	0.9717	0.7272	0.9215	0.3378	0.6956	0.3808	0.6317	0.1985	0.7702		1.5249	1.0031	1.2274	0.7788	1.6283	1.8223	1.4343	1.1065		100	100	100	100	100	100
	3369			16alpha-hydroxy DHEA 3-sulfate	LC/MS neg	38168		HMDB0062544	20848950					0.59426	0.49	0.66	2.18	1.61		0.0256	0.2868	0.0367	0.2939	0.9474	0.978	0.1656	0.7688	0.1016	0.5152	0.0974	0.507	0.1158	0.7608		1.9303	1.1007	1.48	0.7214	1.9767	2.3807	1.5727	1.1471		100	100	100	100	100	100
	3370			androsterone glucuronide	LC/MS neg	61846	C11135	HMDB0002829	114833					1.06169	0.68	1.56	1.74	0.76		0.4622	0.697	0.5294	0.6232	0.346	0.9683	0.831	0.9333	0.2412	0.644	0.2114	0.561	0.8876	0.9973		1.1007	1.0515	1.2499	0.853	1.2179	0.9516	1.4841	1.1686		86	100	100	100	86	67
	3372			epiandrosterone sulfate	LC/MS neg	33973	C04555	HMDB0062657	9929317					1.30636	1	1.61	1.59	0.99		0.2836	0.5998	0.2576	0.5004	0.7439	0.9752	0.5846	0.9116	0.2746	0.6561	0.2948	0.6091	0.6131	0.955		0.9688	0.9742	0.9721	0.9763	1.2602	0.9655	1.5548	1.2656		100	100	100	100	100	100
	3380			androsterone sulfate	LC/MS neg	31591		HMDB0002759	159663					1.13242	0.78	1.69	1.36	0.63		0.9913	0.8367	0.4847	0.6083	0.5828	0.9683	0.9195	0.9453	0.3511	0.6963	0.686	0.7431	0.7067	0.9767		1.0784	1.18	1.3257	1.0343	1.1197	0.8312	1.4081	1.2212		100	100	100	100	100	100
	3383			etiocholanolone glucuronide	LC/MS neg	47112		HMDB0004484	270605					0.818647	0.87	0.77	1.09	1.23		0.3137	0.6205	0.3174	0.532	0.8384	0.9752	0.5905	0.9132	0.3665	0.6963	0.5438	0.6896	0.4157	0.8811		1.5627	1.312	1.3997	1.2243	1.53	1.7257	1.3344	1.2793		100	100	100	100	95	100
	3387			11beta-hydroxyetiocholanolone glucuronide*	LC/MS neg	64418								0.807131	0.71	0.91	1.14	0.89		0.799	0.8012	0.7781	0.6979	0.6669	0.9683	0.633	0.9145	0.911	0.8491	0.8948	0.7951	0.646	0.955		1.206	1.0923	1.2753	0.9093	1.087	1.1366	1.0375	0.9734		79	93	88	100	81	67
	3388			5alpha-androstan-3alpha,17alpha-diol monosulfate	LC/MS neg	37183		HMDB0000412						1.1144	0.83	1.48	1.4	0.78		0.8796	0.8233	0.5057	0.6159	0.2409	0.9683	0.7284	0.9215	0.1709	0.5888	0.3197	0.6143	0.4894	0.8993		0.7439	0.7624	0.8353	0.6895	0.8106	0.6525	0.9686	0.829		64	79	75	83	71	50
	3390			androstenediol (3beta,17beta) monosulfate (1)	LC/MS neg	37211		HMDB0240429	13847309;129670631					0.907625	0.86	0.94	1.76	1.62		0.0351	0.3019	0.5093	0.6182	0.7744	0.9752	0.8012	0.9331	0.4784	0.7273	0.1611	0.5365	0.1046	0.7608		1.4268	1.0146	1.091	0.9382	1.7073	1.7626	1.6519	1.295		100	100	100	100	100	100
	3391			androstenediol (3beta,17beta) monosulfate (2)	LC/MS neg	37210		HMDB0186954 HMDB0240429						1.10069	1.03	1.23	0.7	0.58		0.2129	0.5285	0.584	0.6348	0.8127	0.9752	0.8344	0.9333	0.5567	0.7458	0.4445	0.6493	0.3187	0.8429		1.0289	1.3186	1.3017	1.3354	0.8428	0.7561	0.9295	1.1325		86	100	100	100	81	67
	3393			androstenediol (3beta,17beta) disulfate (1)	LC/MS neg	37202	C04295	HMDB0240313	87120982					0.975154	0.64	1.17	3.23	1.77		0.0096	0.2337	0.6756	0.6697	0.8396	0.9752	0.6772	0.9186	0.871	0.8434	0.0336	0.4159	0.0964	0.7608		1.1833	0.7008	0.8556	0.5461	1.6363	1.511	1.7616	1.1539		100	100	100	100	100	100
	3394			androstenediol (3beta,17beta) disulfate (2)	LC/MS neg	37203		HMDB0240313	87120982					0.909067	0.77	1.01	1.92	1.46		0.0328	0.3019	0.5154	0.6186	0.9547	0.978	0.6897	0.9195	0.5954	0.7607	0.1125	0.507	0.1342	0.7608		1.1217	0.8047	0.9107	0.6988	1.3367	1.3328	1.3407	1.0197		100	100	100	100	100	100
	3397			androstenediol (3alpha, 17alpha) monosulfate (2)	LC/MS neg	37207								1.25436	0.93	1.48	2.27	1.42		0.054	0.333	0.7564	0.6953	0.4115	0.9683	0.7298	0.9215	0.3969	0.704	0.0415	0.4276	0.4383	0.8882		0.9974	0.7943	0.8236	0.7651	1.4542	1.1712	1.7372	1.2511		100	100	100	100	95	100
	3398			androstenediol (3alpha, 17alpha) monosulfate (3)	LC/MS neg	37209								0.949397	0.64	1.12	3.1	1.77		0.0018	0.1363	0.9453	0.7446	0.6052	0.9683	0.6943	0.9195	0.7363	0.8083	0.0059	0.2432	0.0607	0.7604		1.3102	0.7765	0.9469	0.6061	1.7776	1.6736	1.8816	1.2439		100	100	100	100	100	100
	3400			testosterone sulfate	LC/MS neg	35668		HMDB0002833	119207					0.449628	1	0.38	3.06	8.02		0.0056	0.1975	0.3546	0.5576	0.3546	0.9683	1	0.9453	0.1686	0.5888	0.1369	0.5076	0.0133	0.6553		1.209	0.268	0.268	0.268	1.4846	2.15	0.8191	0.5436		21	0	0	0	52	50
	3408			5alpha-androstan-3alpha,17beta-diol monosulfate (1)	LC/MS neg	37186			121596226;121596225					1.27112	0.77	2.02	1.79	0.68		0.7503	0.7835	0.3288	0.5391	0.163	0.9683	0.7715	0.9278	0.0791	0.4774	0.199	0.5495	0.463	0.8977		0.8391	0.8827	1	0.7655	1.0229	0.6781	1.3677	1.0666		93	93	88	100	95	100
	3409			5alpha-androstan-3alpha,17beta-diol monosulfate (2)	LC/MS neg	37185			121596225					2.25821	0.91	2.57	11.98	4.26		0.0002	0.0805	0.1609	0.4541	0.1376	0.9683	0.9536	0.9453	0.0338	0.4065	0.0002	0.0624	0.0806	0.7608		0.7645	0.2785	0.2909	0.2661	2.2124	1.2381	3.1867	1.7264		79	79	75	83	95	83
	3410			5alpha-androstan-3alpha,17beta-diol disulfate	LC/MS neg	37184		HMDB0094682	56639109					1.79371	0.91	2.29	4.46	1.77		0.0009	0.0952	0.203	0.4716	0.1081	0.9683	0.8139	0.9333	0.0342	0.4065	0.0004	0.0685	0.1889	0.7674		0.5245	0.3613	0.3781	0.3446	1.104	0.6709	1.537	0.9408		43	21	38	0	76	50
	3411			5alpha-androstan-3alpha,17beta-diol 17-glucuronide	LC/MS neg	47132								1.30325	0.52	1.76	5.78	1.72		0.0005	0.09	0.7987	0.7014	0.1399	0.9683	0.4053	0.8592	0.1935	0.6009	0.0003	0.0685	0.1265	0.7608		0.6371	0.3566	0.4683	0.2449	1.1108	0.8059	1.4156	0.8303		43	14	25	0	81	67
	3415			5alpha-androstan-3beta,17beta-diol monosulfate (2)	LC/MS neg	37192								1.76839	1.17	2.39	1.95	0.96		0.2081	0.5235	0.1242	0.4204	0.2317	0.9683	0.8106	0.9333	0.0439	0.4259	0.0697	0.4717	0.9652	1		0.6675	0.7396	0.6804	0.7989	1.1082	0.6546	1.5618	1.1804		64	71	63	83	86	67
	3416			5alpha-androstan-3beta,17beta-diol disulfate	LC/MS neg	37190	C12525	HMDB00493	90186325					2.08592	0.94	2.77	4.93	1.68		0.025	0.2868	0.2059	0.4728	0.3546	0.9683	0.8148	0.9333	0.1042	0.5152	0.0192	0.3722	0.3496	0.8621		0.7658	0.5555	0.572	0.539	1.8076	0.9596	2.6557	1.5974		100	100	100	100	100	100
	3419			5alpha-androstan-3beta,17alpha-diol disulfate	LC/MS neg	37187		HMDB0094682	56639109					1.05439	1.19	0.99	1.76	2.12		0.1686	0.4944	0.38	0.5672	0.6461	0.9683	0.7765	0.932	0.3176	0.6798	0.1699	0.5413	0.5304	0.921		1.0222	0.7186	0.6559	0.7813	1.3814	1.3886	1.3743	1.0778		57	71	75	67	81	33
	3423			andro steroid monosulfate C19H28O6S (1)*	LC/MS neg	32827		HMDB0002759	159663					0.598764	0.49	0.66	2.25	1.67		0.0294	0.3019	0.0357	0.2939	0.9422	0.978	0.1645	0.7688	0.0989	0.5115	0.1074	0.507	0.124	0.7608		1.6995	0.9496	1.2723	0.6269	1.7675	2.1266	1.4084	1.0176		100	100	100	100	100	100
	3431			11beta-hydroxyandrosterone glucuronide	LC/MS neg	63251		HMDB0010351						0.923284	0.84	1	1.32	1.1		0.2038	0.5235	0.4774	0.6063	0.6119	0.9683	0.415	0.8592	0.8778	0.8441	0.1842	0.5485	0.6019	0.9458		1.1132	0.9739	1.0603	0.8874	1.1671	1.166	1.1682	1.0278		100	100	100	100	100	100
	3456		Estrogenic Steroids	estrone 3-sulfate	LC/MS neg	18474	C02538	HMDB0001425	3001028					1.39656	0.92	1.92	1.92	0.92		0.206	0.5235	0.2047	0.4728	0.0829	0.9683	0.7414	0.9224	0.0274	0.3632	0.0275	0.4109	0.7396	0.9875		0.5936	0.5938	0.6196	0.5679	0.8289	0.5676	1.0901	0.829		21	21	25	17	43	17
	3483		Primary Bile Acid Metabolism	cholate	LC/MS neg	22842	C00695	HMDB0000619	221493					0.243132	0.03	2.33	6.7	0.1		0.2528	0.5665	0.5222	0.6198	0.3176	0.9683	0.2731	0.7934	0.784	0.8227	0.112	0.507	0.9209	1		7.7608	7.2996	14.1093	0.4899	2.3481	1.4123	3.2839	1.8869		79	86	75	100	95	83
	3484			glycocholate	LC/MS neg	18476	C01921	HMDB0000138	10140					1.27912	1.05	1.43	2.09	1.54		0.4702	0.701	0.2669	0.5032	0.0579	0.9683	0.5778	0.9083	0.0268	0.3632	0.0515	0.4717	0.4126	0.878		1.1651	0.9403	0.9172	0.9635	1.7151	1.4131	2.0172	1.4903		100	100	100	100	100	100
	3485			taurocholate	LC/MS neg	18497	C05122	HMDB0000036	46783527;6675					1.73682	1.32	2.12	1.73	1.08		0.657	0.7632	0.2661	0.5032	0.1062	0.9683	0.7239	0.9215	0.0442	0.4259	0.1233	0.507	0.421	0.8825		1.4488	1.6196	1.3953	1.8439	2.3454	1.5022	3.1886	2.5163		86	100	100	100	90	67
	3486			chenodeoxycholate	LC/MS neg	1563	C02528	HMDB0000518	10133					0.372898	0.16	1.91	1.64	0.14		0.5922	0.743	0.7874	0.6989	0.1469	0.9683	0.2468	0.7881	0.3689	0.6963	0.4831	0.6677	0.1833	0.7608		2.9732	3.0329	5.226	0.8398	1.049	0.7204	1.3776	1.1087		50	43	50	33	62	50
	3487			chenodeoxycholic acid sulfate (1)	LC/MS neg	63607		HMDB0002522	21252308					1.0885	0.64	1.7	1.95	0.73		0.499	0.7176	0.9483	0.7446	0.0939	0.9683	0.2733	0.7934	0.1883	0.598	0.0801	0.4884	0.4889	0.8993		0.7864	0.7446	0.9085	0.5807	0.8977	0.6642	1.1312	0.856		50	43	63	17	48	33
	3491			glycochenodeoxycholate	LC/MS neg	32346	C05466	HMDB0000637	12544					1.5318	1.55	1.52	1.27	1.29		0.5702	0.743	0.2355	0.4866	0.3164	0.9683	0.8988	0.9404	0.1048	0.5152	0.2414	0.5865	0.7675	0.9875		1.0929	1.2158	0.9535	1.4782	1.5512	1.2323	1.8701	1.6741		100	100	100	100	100	100
	3492			taurochenodeoxycholate	LC/MS neg	18494	C05465	HMDB0000951	387316					1.52783	1.3	1.77	1.29	0.95		0.8988	0.8273	0.2346	0.4866	0.4152	0.9683	0.7972	0.9331	0.1365	0.5648	0.4796	0.6665	0.6431	0.955		0.9721	1.1467	0.9972	1.2962	1.3107	0.9471	1.6743	1.4852		100	100	100	100	100	100
	3496			tauro-beta-muricholate	LC/MS neg	33983		HMDB0000932	121596216;168408;21124703					0.69623	0.47	1.92	0.78	0.19		0.1062	0.4075	0.8354	0.7141	0.0954	0.9683	0.2051	0.785	0.266	0.6552	0.9668	0.811	0.0303	0.6915		1.5571	1.9192	2.6199	1.2185	0.722	0.4943	0.9497	1.0841		79	71	88	50	71	67
	3499			glyco-beta-muricholate**	LC/MS neg	62066								0.646272	0.46	1.19	0.92	0.35		0.449	0.6936	0.2548	0.499	0.3289	0.9683	0.1588	0.7544	0.9003	0.8465	0.8671	0.791	0.2471	0.8207		2.0414	2.2005	3.0239	1.3771	1.1602	1.0588	1.2615	1.3193		100	100	100	100	95	100
	3501			cholic acid glucuronide	LC/MS neg	62571		HMDB0002577	21252309					0.391362	0.18	0.71	2.54	0.65		0.1623	0.4944	0.1159	0.4155	0.8786	0.9757	0.2438	0.7881	0.2809	0.6561	0.2434	0.5865	0.3981	0.878		1.6578	1.189	2.012	0.3661	1.1175	1.3036	0.9314	0.6488		64	57	50	67	71	83
	3502			glycochenodeoxycholate glucuronide (1)	LC/MS neg	52983		HMDB0002579	44263370					1.35669	0.59	2.34	3.09	0.78		0.0827	0.3739	0.2832	0.5113	0.0285	0.8652	0.03	0.6452	0.3728	0.6972	0.0044	0.2313	0.7373	0.9875		1.0662	0.9529	1.1979	0.7079	1.5598	0.9345	2.1852	1.4465		100	100	100	100	100	100
	3504			glycochenodeoxycholate 3-sulfate	LC/MS neg	52974		HMDB0002409 HMDB0002497 HMDB0002496	11954205;21125002;21116917					0.977619	0.56	1.54	2.08	0.75		0.1462	0.4767	0.7569	0.6953	0.1447	0.9683	0.2342	0.7875	0.3814	0.6972	0.0324	0.4109	0.9969	1		1.2466	1.1091	1.4257	0.7926	1.3562	1.0676	1.6448	1.2187		100	100	100	100	100	100
	3505			glycocholate glucuronide (1)	LC/MS neg	52977			44263357					0.628489	0.86	0.39	0.43	0.94		0.3112	0.6205	0.4262	0.5906	0.6894	0.9717	0.4233	0.8603	0.7646	0.8182	0.642	0.7331	0.3439	0.8621		2.1714	2.074	2.2344	1.9136	1.4622	2.1084	0.8159	1.3647		93	93	100	83	86	83
	3510		Secondary Bile Acid Metabolism	deoxycholate	LC/MS neg	1114	C04483	HMDB0000626	222528;440355					0.682532	0.35	1.26	2.04	0.57		0.5036	0.7176	0.2087	0.475	0.0251	0.8525	0.0206	0.6452	0.4288	0.7092	0.0302	0.4109	0.2694	0.8287		1.4833	1.2754	1.8849	0.6659	1.2203	1.0816	1.3589	1.0124		100	100	100	100	95	100
	3513			deoxycholic acid 12-sulfate*	LC/MS neg	63688								0.873796	0.4	1.41	3.13	0.89		0.271	0.586	0.4565	0.597	0.0104	0.8182	0.0261	0.6452	0.1488	0.585	0.007	0.268	0.2893	0.8358		1.2773	0.9474	1.355	0.5399	1.446	1.1997	1.6924	1.1161		100	93	100	83	95	100
	3515			deoxycholic acid glucuronide	LC/MS neg	63610								0.401596	0.29	0.51	1.87	1.05		0.0345	0.3019	0.042	0.2991	0.6531	0.9683	0.2719	0.7934	0.0626	0.4636	0.1969	0.5495	0.0835	0.7608		1.7921	1.1239	1.7471	0.5007	1.3878	1.837	0.9386	0.7197		100	100	100	100	100	100
	3518			glycodeoxycholate	LC/MS neg	18477	C05464	HMDB00631	3035026					0.975796	0.59	1.5	1.9	0.74		0.3709	0.6565	0.794	0.7	0.0386	0.9368	0.2128	0.785	0.0788	0.4774	0.3551	0.6317	0.0481	0.7555		1.1279	1.0259	1.2931	0.7588	1.2025	0.9626	1.4424	1.1006		86	93	100	83	81	67
	3520			taurodeoxycholate	LC/MS neg	12261	C05463	HMDB0000896	2733768					1.22008	0.92	1.71	1.12	0.6		0.3501	0.6491	0.691	0.6765	0.0412	0.9368	0.2551	0.7909	0.067	0.4655	0.3825	0.6317	0.0474	0.7553		0.9392	1.1255	1.1715	1.0794	0.9597	0.707	1.2124	1.1459		93	93	100	83	90	83
	3521			taurodeoxycholic acid 3-sulfate	LC/MS neg	62889								0.658574	0.39	1.08	1.82	0.65		0.8015	0.8012	0.0688	0.3448	0.021	0.8525	0.0069	0.6452	0.6846	0.787	0.0528	0.4717	0.154	0.7608		1.1739	0.9843	1.4203	0.5482	0.9627	0.9274	0.998	0.7731		100	86	100	67	95	100
	3528			lithocholate sulfate (1)	LC/MS neg	62526			451489					0.676857	0.55	0.78	1.69	1.19		0.2999	0.6119	0.0585	0.3334	0.3769	0.9683	0.0642	0.666	0.429	0.7092	0.1535	0.5347	0.9163	1		1.3771	0.9743	1.2551	0.6936	1.3348	1.4991	1.1705	0.9321		100	93	100	83	90	100
	3530			glycolithocholate	LC/MS neg	31912	C15557	HMDB0000698	115245					1.36358	1.68	1.06	0.67	1.06		0.6221	0.7521	0.7532	0.6953	0.8036	0.9752	0.7058	0.9195	0.9606	0.8542	0.5785	0.7126	0.8695	0.9953		1.1626	1.517	1.1312	1.9029	1.2308	1.194	1.2677	1.5853		93	100	100	100	90	83
	3531			glycolithocholate sulfate*	LC/MS neg	32620	C11301	HMDB0002639	72222					0.729799	0.7	0.76	0.83	0.77		0.9145	0.8282	0.0357	0.2939	0.3383	0.9683	0.0416	0.6452	0.366	0.6963	0.5217	0.6821	0.4739	0.8977		1.443	1.3905	1.6321	1.149	1.1056	1.254	0.9572	1.0531		100	100	100	100	100	100
	3532			taurolithocholate	LC/MS neg	31889	C02592	HMDB0000722	439763					1.63124	2.25	1.07	0.52	1.1		0.5864	0.743	0.3273	0.539	0.4427	0.9683	0.2434	0.7881	0.8714	0.8434	0.3272	0.6183	0.8795	0.9957		0.4404	0.6822	0.4192	0.9452	0.4767	0.4616	0.4917	0.7184		43	43	50	33	33	33
	3533			taurolithocholate 3-sulfate	LC/MS neg	36850	C03642	HMDB0002580	440071					0.657827	0.77	0.55	0.73	1.03		0.8717	0.8233	0.0361	0.2939	0.5707	0.9683	0.0732	0.666	0.2341	0.6358	0.7604	0.7662	0.625	0.955		1.6705	1.4576	1.647	1.2682	1.3118	1.694	0.9296	1.0989		100	100	100	100	100	100
	3535			ursodeoxycholate	LC/MS neg	1605	C07880	HMDB0000946	31401					2.27055	18.44	0.12	0.05	7.52		0.8224	0.8082	0.9261	0.7438	0.0971	0.9683	0.2863	0.7937	0.1857	0.598	0.2741	0.6062	0.2033	0.7751		4.0114	9.1499	0.9415	17.3584	3.9695	7.0812	0.8578	9.1081		64	64	63	67	71	67
	3540			isoursodeoxycholate	LC/MS neg	57577	C17662	HMDB0000686	127601					1.20936	10.88	0.28	0.27	10.39		0.1438	0.4728	0.2479	0.495	0.0061	0.8182	0.0095	0.6452	0.1945	0.6009	0.2866	0.6091	0.0055	0.5766		2.9289	3.055	0.5143	5.5957	3.416	5.3434	1.4885	3.5421		86	86	75	100	100	100
	3541			isoursodeoxycholate sulfate (1)	LC/MS neg	63602								0.685936	2.01	0.3	0.52	3.47		0.5059	0.7176	0.6382	0.6631	0.0429	0.9368	0.2809	0.7934	0.0616	0.4636	0.2892	0.6091	0.0713	0.7604		1.1988	0.8079	0.5368	1.079	1.2132	1.8608	0.5657	0.8223		14	7	0	17	19	33
	3545			glycoursodeoxycholate	LC/MS neg	39379		HMDB0000708	12310288					3.55086	26.67	0.27	0.07	7.06		0.2043	0.5235	0.7892	0.6989	0.0628	0.9683	0.1501	0.743	0.2223	0.6293	0.6381	0.7324	0.0382	0.7064		3.7946	13.0325	0.942	25.123	4.2362	6.6472	1.8252	13.4741		100	100	100	100	100	100
	3548			glycoursodeoxycholic acid sulfate (1)	LC/MS neg	63731								3.98109	62.67	0.16	0.04	15.36		0.0804	0.366	0.5912	0.6374	0.1119	0.9683	0.4687	0.8715	0.1123	0.5212	0.8988	0.7951	0.0277	0.6722		6.3096	24.5599	0.7715	48.3484	6.8687	11.8476	1.8899	25.1191		93	79	88	67	100	100
	3549			tauroursodeoxycholate	LC/MS neg	39378		HMDB0000874	9848818					1.68006	41.74	0.08	0.05	25.02		0.5063	0.7176	0.8168	0.7058	0.008	0.8182	0.0482	0.6507	0.0603	0.4636	0.1153	0.507	0.0252	0.6722		7.7989	12.808	0.5994	25.0166	8.0935	14.9984	1.1886	13.1026		71	57	50	67	81	100
	3550			tauroursodeoxycholic acid sulfate (1)	LC/MS neg	62784								1.01035	32.58	0.05	0.05	32.95		0.4248	0.6773	0.8054	0.7035	0.005	0.8182	0.0721	0.666	0.0199	0.3322	0.1067	0.507	0.0152	0.6553		4.3691	4.3215	0.2574	8.3855	4.462	8.4809	0.4431	4.4143		43	29	25	33	43	67
	3556			hyocholate (gamma-muricholate)	LC/MS neg	34093	C17649	HMDB0000760	92805					0.264664	0.14	0.68	1.54	0.31		0.9063	0.8282	0.2097	0.475	0.6138	0.9683	0.2387	0.7881	0.5671	0.7508	0.6407	0.7324	0.7947	0.9875		2.38	2.0689	3.6418	0.496	0.941	1.1182	0.7638	0.6299		57	50	50	50	48	67
	3557			glycohyocholate	LC/MS neg	42574		HMDB0000138	71361462					1.10852	0.71	1.82	1.47	0.57		0.82	0.8082	0.9833	0.7494	0.0768	0.9683	0.2339	0.7875	0.1748	0.5888	0.1325	0.507	0.2911	0.8358		0.88	0.956	1.121	0.791	0.8995	0.639	1.1601	0.9755		93	93	100	83	90	83
	3558			taurohyocholate*	LC/MS neg	42603	C15516	HMDB0011637	11954195					1.44112	1.26	1.9	0.61	0.41		0.2481	0.5626	0.6631	0.6683	0.2473	0.9683	0.6234	0.9145	0.2338	0.6358	0.9988	0.8124	0.1241	0.7608		0.8356	1.3399	1.1878	1.492	0.6999	0.4834	0.9164	1.2042		36	36	50	17	48	17
	3566			glycocholenate sulfate*	LC/MS neg	32599								0.850573	0.59	1.09	2.06	1.12		0.0585	0.3352	0.2552	0.499	0.0952	0.9683	0.0625	0.666	0.6762	0.787	0.0095	0.2796	0.8714	0.9953		1.1437	0.8587	1.0813	0.6361	1.2578	1.2062	1.3094	0.9728		100	100	100	100	100	100
	3567			taurocholenate sulfate*	LC/MS neg	32807								0.821229	0.79	0.85	1.22	1.13		0.256	0.5716	0.2234	0.482	0.7911	0.9752	0.3191	0.8223	0.47	0.7202	0.2937	0.6091	0.5548	0.9292		1.2172	1.0218	1.1439	0.8997	1.1949	1.2904	1.0995	0.9996		100	100	100	100	100	100
	3570			3beta-hydroxy-5-cholenoate	LC/MS neg	43507		HMDB0000308	92997					1.10626	1.08	1.14	0.75	0.71		0.2796	0.5955	0.9342	0.7446	0.4445	0.9683	0.6461	0.9164	0.5248	0.7385	0.8085	0.7794	0.2179	0.7921		1.0503	1.2816	1.2316	1.3316	0.9306	0.869	0.9922	1.1619		79	93	88	100	86	67
	3571			glycodeoxycholate 3-sulfate	LC/MS neg	52975			101602538					0.679753	0.3	1.4	2.49	0.53		0.5066	0.7176	0.0514	0.3184	0.0042	0.8182	0.0017	0.5575	0.4325	0.7092	0.0083	0.268	0.1154	0.7608		1.2328	1.0448	1.6097	0.4798	1.026	0.8559	1.1961	0.838		100	100	100	100	95	100
	3572			taurochenodeoxycholic acid 3-sulfate	LC/MS neg	62890		HMDB0002486	52931550					0.791181	0.51	1.17	1.74	0.75		0.887	0.8253	0.6751	0.6697	0.3254	0.9683	0.3474	0.841	0.6687	0.7842	0.3981	0.6317	0.57	0.9343		2.0094	1.7298	2.2972	1.1625	1.8694	1.7216	2.0171	1.5898		86	64	75	50	90	100
	3580			glycoursodeoxycholic acid sulfate (2)	LC/MS neg	63732								0.909273	0.47	1.5	2.41	0.75		0.4561	0.6951	0.4186	0.5887	0.0188	0.8525	0.0343	0.6452	0.2224	0.6293	0.0213	0.3825	0.2559	0.8251		0.8972	0.7524	1.0263	0.4786	0.9605	0.7681	1.153	0.8158		86	64	88	33	90	83
	4150	Nucleotide	Purine Metabolism, (Hypo)Xanthine/Inosine containing	inosine	LC/MS neg	1123	C00294	HMDB0000195	6021					1.14714	1.24	1.07	1.04	1.21		0.5956	0.743	0.7874	0.6989	0.5753	0.9683	0.8449	0.9333	0.5341	0.7407	0.9822	0.8124	0.4651	0.8977		1.0874	1.105	0.9853	1.2247	1.2297	1.1894	1.2701	1.2474		100	100	100	100	100	100
	4151			hypoxanthine	LC/MS neg	3127	C00262	HMDB0000157	790;135398638					0.908641	0.93	0.89	0.99	1.04		0.9884	0.8367	0.4084	0.5818	0.8206	0.9752	0.6856	0.9194	0.4298	0.7092	0.8564	0.7876	0.8868	0.9973		1.2128	1.1494	1.1897	1.1091	1.1654	1.236	1.0949	1.102		100	100	100	100	100	100
	4152			xanthine	LC/MS polar	3147	C00385	HMDB0000292	1188					0.900391	0.75	1.08	1.25	0.86		0.8363	0.8098	0.378	0.5653	0.2611	0.9683	0.1812	0.7815	0.8524	0.8387	0.3181	0.6143	0.5346	0.922		1.1244	1.0526	1.2064	0.8989	1.0842	1.0424	1.126	1.0124		100	100	100	100	100	100
	4157			N1-methylinosine	LC/MS pos early	48351		HMDB0002721	650095					0.97209	0.97	0.98	1.29	1.28		0.0601	0.3419	0.5051	0.6158	0.9577	0.978	0.6799	0.9186	0.5891	0.7593	0.1646	0.5365	0.1884	0.7674		0.9853	0.8517	0.8659	0.8375	1.0915	1.1048	1.0781	0.9578		100	93	100	83	100	100
	4162			urate	LC/MS neg	1604	C00366	HMDB0000289	1175					1.17089	1.13	1.21	1.17	1.09		0.0796	0.366	0.0305	0.2794	0.7788	0.9752	0.1929	0.785	0.065	0.4651	0.1262	0.507	0.313	0.8429		0.8912	0.9071	0.8526	0.9616	1.0276	0.9297	1.1254	1.0435		100	100	100	100	100	100
	4164			allantoin	LC/MS polar	1107	C02350 C02348 C01551	HMDB0000462	204;439714;439713					1.08402	1.08	1.09	1.02	1.01		0.9117	0.8282	0.1731	0.4558	0.8884	0.9758	0.4071	0.8592	0.2582	0.6517	0.8506	0.7865	0.9843	1		0.9403	0.9736	0.9373	1.0099	0.986	0.9432	1.0288	1.0193		100	100	100	100	100	100
	4170		Purine Metabolism, Adenine containing	adenosine 5'-monophosphate (AMP)	LC/MS pos early	32342	C00020	HMDB0000045	6083					1.00805	1.04	0.98	0.97	1.03		0.8484	0.8128	0.8491	0.7198	0.8814	0.9757	0.8199	0.9333	0.9754	0.8575	0.7986	0.7794	0.9775	1		1.0065	1.0118	0.9935	1.0301	1.0092	1.0194	0.999	1.0146		93	100	100	100	95	83
	4178			adenine	LC/MS pos early	554	C00147	HMDB0000034	190					1.02517	1	1.05	1.01	0.96		0.8777	0.8233	0.9817	0.7492	0.7384	0.9752	0.8107	0.9333	0.8154	0.8306	0.8924	0.7951	0.7435	0.9875		1.0251	1.0474	1.0475	1.0472	1.0287	1.0028	1.0546	1.0509		100	100	100	100	95	100
	4184			N1-methyladenosine	LC/MS pos early	15650	C02494	HMDB0003331	27476					0.962898	0.94	0.98	1.08	1.03		0.2911	0.6063	0.4249	0.5906	0.73	0.9752	0.4436	0.8659	0.7322	0.806	0.2943	0.6091	0.6298	0.955		1.0188	0.972	1.0013	0.9427	1.0278	1.0362	1.0194	0.981		100	100	100	100	100	100
	4185			N6-methyladenosine	LC/MS pos early	37114		HMDB0004044	102175					1.02059	0.82	1.28	1.2	0.77		0.6761	0.7671	0.9489	0.7446	0.1733	0.9683	0.3794	0.8577	0.2825	0.6561	0.4715	0.6608	0.2324	0.8027		0.8015	0.8247	0.9053	0.7441	0.7948	0.6977	0.892	0.818		64	79	75	83	52	50
	4195			N6-carbamoylthreonyladenosine	LC/MS neg	35157		HMDB0041623	161466					1.01708	0.99	1.05	1.09	1.02		0.5218	0.722	0.742	0.6942	0.6252	0.9683	0.9146	0.9453	0.5403	0.7421	0.3986	0.6317	0.9181	1		0.9896	0.9714	0.9776	0.9652	1.0247	1.0015	1.0478	1.0065		100	100	100	100	100	100
	4205			N6-succinyladenosine	LC/MS neg	48130		HMDB0000912	165243					1.09608	1.05	1.15	0.99	0.91		0.529	0.7265	0.4368	0.5941	0.6697	0.9683	0.8122	0.9333	0.3678	0.6963	0.8782	0.7933	0.4793	0.8977		0.9013	0.9675	0.9443	0.9907	0.9216	0.8582	0.985	0.9879		79	86	88	83	76	67
	4213		Purine Metabolism, Guanine containing	guanosine	LC/MS neg	1573	C00387	HMDB0000133	6802					1.28139	1.4	1.18	0.94	1.11		0.7206	0.7761	0.9193	0.7421	0.4827	0.9683	0.5895	0.9132	0.6514	0.7814	0.7949	0.778	0.4777	0.8977		1.0242	1.1612	0.9689	1.3535	1.1754	1.0795	1.2713	1.3124		100	100	100	100	100	100
	4217			7-methylguanine	LC/MS pos early	35114	C02242	HMDB0000897	135398679					1.04206	1.06	1.03	1.15	1.18		0.185	0.5077	0.7659	0.6969	0.7252	0.9752	0.6634	0.9186	0.9678	0.8569	0.4585	0.6592	0.26	0.8277		1.0413	0.9816	0.9541	1.0091	1.1448	1.1284	1.1611	1.0851		100	100	100	100	100	100
	4222			N2-methylguanosine	LC/MS neg	35133		HMDB0005862	135501934					0.88968	0.85	0.93	1.03	0.93		0.9502	0.8342	0.4282	0.5906	0.824	0.9752	0.4959	0.8737	0.6674	0.7834	0.9044	0.7962	0.8485	0.9953		0.9409	0.8996	0.9733	0.8259	0.8784	0.9085	0.8483	0.8371		64	57	63	50	76	67
	4223			N2,N2-dimethylguanosine	LC/MS pos early	35137		HMDB0004824	135501639					1.05717	0.93	1.19	1.25	0.97		0.4022	0.6658	0.8381	0.7147	0.223	0.9683	0.4917	0.8715	0.2854	0.6561	0.1266	0.507	0.7933	0.9875		1.0005	0.9776	1.0146	0.9406	1.0806	0.9863	1.1748	1.0577		100	100	100	100	100	100
	4237		Pyrimidine Metabolism, Orotate containing	dihydroorotate	LC/MS polar	601	C00337	HMDB03349	648					1.09125	0.93	1.31	1.01	0.72		0.2292	0.5493	0.5858	0.6356	0.1323	0.9683	0.5093	0.8824	0.126	0.5513	0.8122	0.7794	0.0724	0.7604		1.0444	1.1742	1.2141	1.1343	1.0099	0.8747	1.1451	1.1397		100	100	100	100	100	100
	4238			orotate	LC/MS polar	1505	C00295	HMDB0000226	967					1.00687	1.1	0.91	0.85	1.03		0.6197	0.7521	0.7802	0.6979	0.4438	0.9683	0.7425	0.9224	0.4338	0.7092	0.3456	0.6294	0.8551	0.9953		1.0774	1.118	1.0637	1.1723	1.0442	1.091	0.9974	1.0848		100	100	100	100	100	100
	4240			orotidine	LC/MS polar	35172		HMDB0000788	92751					1.10353	1.09	1.12	1.03	1		0.9364	0.8342	0.4074	0.5817	0.9657	0.978	0.5578	0.9072	0.5545	0.7449	0.9266	0.8031	0.9803	1		1.0123	1.0565	1.012	1.101	1.0729	1.0127	1.1331	1.1171		100	100	100	100	100	100
	4250		Pyrimidine Metabolism, Uracil containing	uridine	LC/MS neg	606	C00299	HMDB0000296	6029					1.2055	1.13	1.29	1.06	0.92		0.8513	0.8135	0.0456	0.3072	0.463	0.9683	0.3757	0.8565	0.0422	0.4259	0.6806	0.7431	0.5363	0.922		0.8691	0.9623	0.9055	1.0191	0.9545	0.8326	1.0763	1.0477		100	100	100	100	100	100
	4251			uracil	LC/MS polar	605	C00106	HMDB0000300	1174					0.996779	0.99	1	1.13	1.11		0.6773	0.7671	0.9473	0.7446	0.9007	0.9776	0.9686	0.9453	0.8862	0.8441	0.685	0.7431	0.8448	0.9953		0.9935	0.9345	0.9397	0.9294	1.0492	1.0472	1.0512	0.9903		57	57	50	67	71	67
	4252			pseudouridine	LC/MS neg	33442	C02067	HMDB0000767	15047					1.00583	1.02	1	0.91	0.93		0.2019	0.5235	0.9192	0.7421	0.815	0.9752	0.822	0.9333	0.9207	0.8491	0.2569	0.5908	0.4791	0.8977		1.0113	1.0583	1.0503	1.0664	0.9702	0.9723	0.9681	1.0172		100	100	100	100	100	100
	4253			5,6-dihydrouridine	LC/MS neg	61833		HMDB0000497	94312					0.994278	1.04	0.95	0.88	0.97		0.1725	0.4948	0.851	0.7208	0.4378	0.9683	0.6917	0.9195	0.4699	0.7202	0.1118	0.507	0.6849	0.9697		1.0485	1.0877	1.0654	1.1101	1.0032	1.0315	0.9749	1.0425		100	100	100	100	100	100
	4254			2'-O-methyluridine	LC/MS neg	57655		HMDB0240328	102212					2.03361	2.24	1.67	0.42	0.56		0.2621	0.5768	0.1213	0.4204	0.6515	0.9683	0.1792	0.7795	0.4004	0.7045	0.2397	0.5865	0.6485	0.955		1.1811	2.4513	1.5139	3.3886	1.1318	0.8483	1.4152	2.4019		93	100	100	100	90	83
	4255			5-methyluridine (ribothymidine)	LC/MS neg	35136		HMDB0000884	445408					0.990262	1.02	0.96	1.11	1.19		0.0631	0.3419	0.9564	0.7451	0.7055	0.9717	0.8282	0.9333	0.7456	0.8096	0.255	0.5908	0.1316	0.7608		1.0064	0.9321	0.9207	0.9434	1.071	1.0921	1.0498	0.9966		100	100	100	100	100	100
	4262			5,6-dihydrouracil	LC/MS neg	1559	C00429	HMDB0000076	649					1.09632	1.56	0.8	0.82	1.6		0.326	0.63	0.5064	0.6161	0.0246	0.8525	0.0504	0.6507	0.2145	0.6188	0.3142	0.614	0.0314	0.7032		0.9053	0.8935	0.6969	1.0901	1.0043	1.1137	0.895	0.9925		43	36	25	50	52	67
	4266			2'-deoxyuridine	LC/MS neg	52602	C00526	HMDB0000012	13712					0.970971	1.08	0.88	1.01	1.24		0.3341	0.6352	0.7677	0.6973	0.572	0.9683	0.8558	0.9338	0.5193	0.7385	0.7605	0.7662	0.3057	0.8407		1.1437	1.0648	1.023	1.1065	1.1894	1.2643	1.1144	1.1105		100	100	100	100	100	100
	4269			3-ureidopropionate	LC/MS pos early	3155	C02642	HMDB0000026	111					1.0341	1.04	1.03	1.26	1.28		0.1641	0.4944	0.8618	0.7256	0.7776	0.9752	0.7595	0.9257	0.9351	0.8506	0.3991	0.6317	0.2601	0.8277		0.962	0.8626	0.8439	0.8812	1.0942	1.0801	1.1083	0.9948		100	100	100	100	100	100
	4270			beta-alanine	LC/MS pos early	55	C00099	HMDB0000056	239					0.653146	1.04	0.54	1.82	3.48		0.0289	0.2997	0.4436	0.5945	0.6285	0.9683	0.8485	0.9333	0.3502	0.6963	0.1863	0.5485	0.0717	0.7604		2.4924	1.1341	1.1127	1.1556	2.9862	3.8722	2.1002	1.6279		100	93	100	83	100	100
	4275			3-(3-amino-3-carboxypropyl)uridine*	LC/MS neg	62924			171198					1.05774	1.08	1.03	1	1.04		0.9194	0.8298	0.639	0.6634	0.7698	0.9752	0.6096	0.9145	0.8944	0.8465	0.8857	0.7938	0.7917	0.9875		0.9993	1.0192	0.9793	1.0592	1.0371	1.0193	1.0549	1.057		100	100	100	100	100	100
	4282		Pyrimidine Metabolism, Cytidine containing	cytidine	LC/MS neg	514	C00475	HMDB0000089	6175					1.48042	2	1.08	0.69	1.27		0.7322	0.7808	0.0972	0.3843	0.1212	0.9683	0.0341	0.6452	0.9306	0.8506	0.156	0.5365	0.4089	0.878		1.0572	1.3934	0.9302	1.8565	1.229	1.1843	1.2737	1.5651		100	100	100	100	100	100
	4283			cytosine	LC/MS pos early	573	C00380	HMDB0000630	597					0.531131	2	0.28	0.83	5.86		0.0408	0.3155	0.3955	0.5743	0.0269	0.8525	0.3344	0.8341	0.0232	0.3474	0.8882	0.7938	0.0054	0.5766		1.5467	0.6754	0.4509	0.8999	1.6928	2.6426	0.7431	0.8215		43	29	25	33	48	67
	4285			3-methylcytidine	LC/MS pos early	35132		HMDB0240577	14237477					0.794476	0.73	0.86	1.22	1.03		0.377	0.6567	0.1215	0.4204	0.9208	0.978	0.2649	0.793	0.2717	0.6561	0.4604	0.6598	0.5971	0.944		0.9269	0.7877	0.911	0.6644	0.8756	0.9427	0.8084	0.7364		86	57	75	33	76	100
	4287			N4-acetylcytidine	LC/MS pos early	35130		HMDB0005923	107461					1.1323	1.39	0.94	0.94	1.38		0.9365	0.8342	0.6836	0.674	0.2004	0.9683	0.2575	0.7909	0.5062	0.7318	0.3642	0.6317	0.3588	0.8621		1.096	1.0993	0.9192	1.2795	1.2376	1.2728	1.2025	1.241		100	100	100	100	100	100
	4295			2'-O-methylcytidine	LC/MS pos early	57554			150971					1.17066	1.41	0.87	0.49	0.8		0.274	0.5895	0.8938	0.736	0.5386	0.9683	0.746	0.9224	0.5746	0.7545	0.2026	0.5536	0.7436	0.9875		0.8678	1.1626	0.9659	1.3592	0.7212	0.7697	0.6727	1.0159		79	79	75	83	76	83
	4311		Pyrimidine Metabolism, Thymine containing	5,6-dihydrothymine	LC/MS neg	1418	C00906	HMDB0000079	93556					1.08927	1.15	1.03	0.85	0.95		0.3908	0.6625	0.484	0.6083	0.5034	0.9683	0.3599	0.846	0.9814	0.8579	0.2547	0.5908	0.8977	1		1.0115	1.1144	1.0384	1.1904	0.9989	0.9846	1.0132	1.1018		100	100	100	100	100	100
	4314			3-aminoisobutyrate	LC/MS pos early	1566	C05145	HMDB0002166	64956					0.766035	1.09	0.58	0.93	1.73		0.091	0.3878	0.2404	0.4895	0.0157	0.8182	0.369	0.846	0.0084	0.2703	0.5471	0.6901	0.0071	0.6167		1.1724	0.8954	0.8582	0.9326	1.1751	1.4866	0.8636	0.8981		100	100	100	100	100	100
	4315		Purine and Pyrimidine Metabolism	methylphosphate	LC/MS pos early	37070		HMDB61711	13130					1.16267	0.95	1.44	1.19	0.79		0.8861	0.8253	0.0929	0.3791	0.0314	0.9124	0.7295	0.9215	0.0054	0.2463	0.1238	0.507	0.1178	0.7608		0.9799	1.0683	1.0971	1.0395	1.0509	0.8627	1.2391	1.1393		100	100	100	100	100	100
	4331	Cofactors and Vitamins	Nicotinate and Nicotinamide Metabolism	quinolinate	LC/MS polar	1899	C03722	HMDB0000232	1066					1.08891	0.97	1.22	1.06	0.85		0.3541	0.6503	0.4908	0.6105	0.3876	0.9683	0.9052	0.9427	0.2469	0.6472	0.9617	0.8101	0.232	0.8027		0.9414	1.0067	1.0194	0.9939	0.9599	0.8634	1.0563	1.0251		100	100	100	100	100	100
	4335			nicotinamide	LC/MS pos early	594	C00153	HMDB0001406	936					1.31432	0.65	2.09	2.75	0.86		0.1724	0.4948	0.7417	0.6942	0.2422	0.9683	0.5683	0.9083	0.2615	0.653	0.0613	0.4717	0.8919	1		0.4855	0.4317	0.5226	0.3408	0.692	0.4484	0.9355	0.6381		43	36	38	33	62	50
	4347			1-methylnicotinamide	LC/MS pos early	27665	C02918	HMDB0000699	457					1.21437	1.1	1.28	1.96	1.69		0.0541	0.333	0.7236	0.6884	0.6929	0.9717	0.6158	0.9145	0.9752	0.8575	0.2382	0.5865	0.1174	0.7608		0.9726	0.7615	0.7242	0.7989	1.3922	1.221	1.5633	1.1811		93	93	88	100	100	100
	4353			trigonelline (N'-methylnicotinate)	LC/MS pos early	32401	C01004	HMDB0000875	5570					0.968304	0.92	1.01	1.3	1.2		0.9392	0.8342	0.4838	0.6083	0.7602	0.9752	0.7898	0.9331	0.4515	0.7196	0.7748	0.7715	0.8779	0.9953		1.2967	1.1359	1.181	1.0907	1.4164	1.4123	1.4205	1.2556		100	100	100	100	100	100
	4355			N1-methyl-2-pyridone-5-carboxamide	LC/MS neg	40469	C05842	HMDB0004193	69698					1.20818	1.71	0.94	1.03	1.87		0.1727	0.4948	0.4652	0.6034	0.5122	0.9683	0.3541	0.8413	0.9547	0.8516	0.5866	0.7147	0.1771	0.7608		1.2691	1.1968	0.8845	1.5092	1.6055	1.6537	1.5574	1.5333		100	100	100	100	100	100
	4363		Riboflavin Metabolism	riboflavin (vitamin B2)	LC/MS neg	1827	C00255	HMDB0000244	493570					1.02148	1.17	0.81	0.49	0.69		0.5717	0.743	0.7964	0.7	0.4546	0.9683	0.4999	0.8761	0.7119	0.7964	0.3266	0.6183	0.9017	1		1.7927	2.2902	2.1154	2.465	1.3337	1.4701	1.1974	1.8312		86	86	75	100	95	100
	4367		Pantothenate and CoA Metabolism	pantoate	LC/MS neg	63061	C00522	HMDB0240389	5289105					0.940016	0.71	1.27	1.28	0.71		0.9613	0.8346	0.5886	0.637	0.4999	0.9683	0.4159	0.8596	0.9194	0.8491	0.5872	0.7147	0.6737	0.9653		1.1403	1.1352	1.3308	0.9397	1.077	0.9499	1.2042	1.0719		93	86	100	67	81	83
	4368			pantothenate	LC/MS neg	1508	C00864	HMDB0000210	6613					0.916812	1.3	0.66	0.76	1.5		0.6251	0.7521	0.434	0.5929	0.4155	0.9683	0.9826	0.9453	0.2341	0.6358	0.8052	0.7794	0.3831	0.8768		1.4906	1.3735	1.1931	1.554	1.4836	1.7881	1.1792	1.3666		100	100	100	100	100	100
	4380		Ascorbate and Aldarate Metabolism	ascorbic acid 2-sulfate	LC/MS polar	63590		HMDB0060649	54676864					0.950988	0.93	0.98	0.63	0.59		0.0028	0.1571	0.8839	0.7321	0.8549	0.9757	0.8254	0.9333	0.9779	0.8575	0.0284	0.4109	0.0281	0.6722		1.0936	1.3243	1.3716	1.277	0.8093	0.8155	0.8031	1.04		100	100	100	100	100	100
	4381			ascorbic acid 3-sulfate*	LC/MS polar	63687			11425365					1.14568	1.15	1.14	0.74	0.74		0.3117	0.6205	0.916	0.7421	0.428	0.9683	0.6435	0.9164	0.5003	0.7293	0.8669	0.791	0.2285	0.801		1.158	1.4278	1.3273	1.5284	1.0568	0.9887	1.1249	1.3267		100	100	100	100	100	100
	4384			2-O-methylascorbic acid	LC/MS polar	63990		HMDB0240294	54726398					1.05652	0.91	1.24	1.06	0.78		0.2887	0.6055	0.7377	0.6927	0.2822	0.9683	0.6154	0.9145	0.2909	0.6609	0.991	0.8124	0.1548	0.7608		0.9926	1.0666	1.1143	1.0188	0.9747	0.8708	1.0787	1.0487		100	100	100	100	100	100
	4385			threonate	LC/MS polar	27738	C01620	HMDB0000943 HMDB0062620	5460407;151152					0.926373	1.08	0.71	0.47	0.71		0.0166	0.2868	0.5233	0.6198	0.7616	0.9752	0.8213	0.9333	0.4807	0.7273	0.0412	0.4276	0.1452	0.7608		1.3256	1.6104	1.5466	1.6741	0.9433	1.1046	0.782	1.228		100	100	100	100	100	100
	4388			oxalate (ethanedioate)	LC/MS neg	20694	C00209	HMDB0002329	971					0.785734	0.9	0.62	0.48	0.7		0.0367	0.3019	0.2634	0.5029	0.8174	0.9752	0.3645	0.846	0.5017	0.7293	0.1536	0.5347	0.1152	0.7608		1.8323	2.0544	2.16	1.9489	1.2176	1.5047	0.9306	1.4397		100	100	100	100	100	100
	4389			gulonate*	LC/MS polar	46957	C00800	HMDB0003290	152304					1.21888	1.25	1.19	1.06	1.11		0.821	0.8082	0.0842	0.3704	0.9494	0.978	0.2243	0.785	0.2065	0.6095	0.9028	0.7962	0.8459	0.9953		1.0083	1.0752	0.9571	1.1933	1.1621	1.0596	1.2646	1.229		100	100	100	100	100	100
	4391		Tocopherol Metabolism	alpha-CMBHC glucuronide	LC/MS neg	63926								0.490051	0.54	0.44	0.77	0.93		0.5746	0.743	0.1588	0.454	0.59	0.9683	0.192	0.785	0.5049	0.7316	0.9865	0.8124	0.4614	0.8977		2.0404	1.6209	2.1099	1.132	1.4193	1.9709	0.8677	0.9999		79	93	88	100	86	67
	4392			alpha-tocopherol	LC/MS pos late	1561	C02477	HMDB0001893	86472					0.867627	0.79	0.97	0.89	0.73		0.0319	0.3019	0.1393	0.43	0.3278	0.9683	0.1021	0.7173	0.6974	0.7915	0.3548	0.6317	0.0375	0.7064		1.1732	1.2142	1.3541	1.0744	0.9769	0.9923	0.9615	1.0179		100	100	100	100	100	100
	4400			gamma-CEHC	LC/MS neg	44876		HMDB0001931	133098					0.765241	0.83	0.69	0.76	0.91		0.6905	0.772	0.3213	0.5354	0.9561	0.978	0.5276	0.8922	0.4312	0.7092	0.7339	0.7561	0.8178	0.9933		1.5829	1.5168	1.6574	1.3762	1.2774	1.5085	1.0464	1.2113		100	100	100	100	100	100
	4401			gamma-CEHC glucuronide*	LC/MS neg	42381			121596235					0.632567	0.57	0.7	1.12	0.91		0.6162	0.7505	0.0661	0.3429	0.5167	0.9683	0.0958	0.7173	0.3561	0.6963	0.3901	0.6317	0.9207	1		1.3099	1.0753	1.3686	0.7819	1.0633	1.2512	0.8754	0.8286		93	71	88	50	95	100
	4402			alpha-CEHC glucuronide*	LC/MS neg	39346		HMDB0062445	134819285					0.765988	0.81	0.68	0.4	0.47		0.3175	0.623	0.0927	0.3791	0.7014	0.9717	0.1647	0.7688	0.32	0.6801	0.6404	0.7324	0.3539	0.8621		1.1978	1.4731	1.6311	1.315	0.6422	0.7644	0.5201	0.9175		86	64	88	33	57	83
	4403			alpha-CEHC sulfate	LC/MS neg	47666								0.776708	0.86	0.61	0.35	0.5		0.1681	0.4944	0.0967	0.3843	0.4371	0.9683	0.1036	0.7173	0.4927	0.7286	0.643	0.7331	0.1503	0.7608		1.1008	1.3673	1.472	1.2626	0.5885	0.7296	0.4474	0.855		71	64	75	50	57	67
	4408			delta-CEHC	LC/MS neg	62287			35027084					0.96727	0.95	0.98	1	0.97		0.9526	0.8346	0.9918	0.7506	0.849	0.9757	0.8929	0.9404	0.8925	0.8464	0.9217	0.803	0.8669	0.9953		1.0388	1.0297	1.0546	1.0048	1.0138	1.0229	1.0048	1.0048		86	86	88	83	90	83
	4409			delta-CEHC glucuronide	LC/MS neg	62286								0.881446	0.86	0.9	1.08	1.03		0.7051	0.776	0.8293	0.7105	0.8742	0.9757	0.9693	0.9453	0.7792	0.8226	0.8686	0.791	0.7189	0.983		0.8688	0.7955	0.8547	0.7364	0.839	0.8829	0.7952	0.7658		57	50	50	50	62	67
	4411			gamma-CEHC sulfate	LC/MS neg	62280								0.872656	1.28	0.71	1.4	2.53		0.0355	0.3019	0.8263	0.7093	0.5478	0.9683	0.5821	0.9098	0.7739	0.8226	0.2419	0.5865	0.0692	0.7604		1.2423	0.8031	0.7042	0.9019	1.5234	1.7803	1.2664	1.0841		57	50	50	50	71	67
	4414			gamma-tocopherol/beta-tocopherol	LC/MS pos late	52473	C14152 C02483	HMDB0006335 HMDB0001492						1.42835	1.52	1.36	1.17	1.32		0.2271	0.5463	0.3016	0.5261	0.6035	0.9683	0.7267	0.9215	0.2464	0.6472	0.1972	0.5495	0.6384	0.955		0.8283	0.9031	0.7156	1.0905	1.1084	0.9411	1.2757	1.1831		100	100	100	100	100	100
	4439		Hemoglobin and Porphyrin Metabolism	heme	LC/MS pos late	41754	C00032	HMDB0003178	26945					0.507229	0.78	0.37	0.92	1.97		0.0743	0.3597	0.0046	0.1583	0.0751	0.9683	0.4209	0.8601	0.0009	0.1139	0.997	0.8124	0.019	0.6553		1.6324	0.9808	1.1001	0.8615	1.4796	2.1647	0.7945	0.828		86	79	75	83	81	100
	4440			bilirubin (Z,Z)	LC/MS pos late	43807	C00486	HMDB0000054	5280352					0.876291	0.75	0.98	1.49	1.14		0.0702	0.3528	0.6461	0.6661	0.417	0.9683	0.3948	0.8592	0.7896	0.8241	0.0518	0.4717	0.4855	0.8993		1.0751	0.8821	1.0065	0.7576	1.1351	1.1437	1.1265	0.9421		100	100	100	100	100	100
	4441			bilirubin (E,E)*	LC/MS pos late	32586		HMDB0240584	129320511					0.858231	0.84	0.88	1.17	1.11		0.5284	0.7265	0.5405	0.6238	0.5352	0.9683	0.4096	0.8592	0.9951	0.8588	0.3502	0.6302	0.9945	1		1.1025	0.9588	1.0437	0.874	1.0898	1.1613	1.0184	0.9462		100	100	100	100	100	100
	4442			bilirubin (E,Z or Z,E)*	LC/MS pos late	47886	C00486	HMDB0000488	5799469					0.931169	0.83	1.01	1.52	1.25		0.0252	0.2868	0.7355	0.6922	0.5465	0.9683	0.5284	0.8923	0.8415	0.8351	0.0337	0.4159	0.2513	0.8209		1.001	0.8147	0.8904	0.7391	1.1184	1.1116	1.1251	0.9321		100	100	100	100	100	100
	4443			biliverdin	LC/MS pos late	2137	C00500	HMDB0001008	5280353					0.898724	0.76	1.03	1.4	1.04		0.2944	0.6092	0.7262	0.6894	0.2816	0.9683	0.3385	0.8341	0.5816	0.7552	0.115	0.507	0.9844	1		1.1207	0.9681	1.0973	0.839	1.1598	1.1441	1.1754	1.0072		100	100	100	100	100	100
	4444			I-urobilinogen	LC/MS neg	32426	C05789	HMDB0004157	9548718					0.830638	0.29	1.26	5.36	1.25		0.1733	0.4954	0.5701	0.6305	0.5755	0.9683	0.4503	0.8701	0.9952	0.8588	0.1517	0.5313	0.5826	0.9369		0.3525	0.2026	0.3131	0.0921	0.4428	0.392	0.4936	0.2928		36	21	38	0	33	33
	4446			L-urobilin	LC/MS pos late	40173	C05793	HMDB0240259	5280818					0.67778	0.19	3.06	3.34	0.21		0.9967	0.838	0.816	0.7058	0.1364	0.9683	0.2457	0.7881	0.3392	0.6956	0.259	0.5943	0.3143	0.8429		2.2075	2.1767	3.6633	0.69	1.527	0.7516	2.3024	1.4962		50	36	63	0	33	33
	4461		Vitamin A Metabolism	retinol (vitamin A)	LC/MS pos late	1806	C00473	HMDB0000305	445354					1.09372	0.97	1.21	1.24	0.99		0.3789	0.6567	0.2717	0.5038	0.1906	0.9683	0.8841	0.9398	0.0749	0.4655	0.1044	0.507	0.7671	0.9875		0.9251	0.9169	0.929	0.9049	1.0199	0.9212	1.1187	1.0118		100	100	100	100	100	100
	4463			carotene diol (1)	LC/MS pos late	57635								1.55353	2.03	1.06	0.51	0.98		0.4789	0.7073	0.2134	0.4771	0.1237	0.9683	0.0649	0.666	0.8166	0.8306	0.0946	0.507	0.5657	0.9343		1.1078	1.6954	1.1174	2.2734	1.1334	1.0982	1.1686	1.721		100	100	100	100	100	100
	4464			carotene diol (2)	LC/MS pos late	57636								1.24374	1.85	0.79	0.56	1.32		0.9451	0.8342	0.5479	0.6244	0.0423	0.9368	0.0771	0.666	0.2659	0.6552	0.1109	0.507	0.1791	0.7608		1.2029	1.4782	1.0388	1.9176	1.2208	1.3671	1.0746	1.4961		100	100	100	100	100	100
	4465			carotene diol (3)	LC/MS pos late	57637								1.46743	1.94	1.06	0.64	1.17		0.7018	0.776	0.2184	0.4808	0.1729	0.9683	0.0851	0.6904	0.9177	0.8491	0.1912	0.5485	0.5036	0.9077		1.0256	1.3927	0.9472	1.8382	1.1379	1.104	1.1717	1.505		86	86	75	100	95	100
	4467			beta-cryptoxanthin	LC/MS pos late	57591	C08591	HMDB0033844	5281235					1.24281	3.08	0.54	0.46	2.62		0.9226	0.8308	0.2476	0.495	0.0022	0.8182	0.0049	0.6221	0.115	0.5212	0.021	0.3825	0.0279	0.6722		1.3282	1.496	0.7337	2.2584	1.4828	1.9227	1.0429	1.6507		86	86	75	100	100	100
	4469			retinal	LC/MS pos late	40807	C00376	HMDB0001358	638015					1.17321	1.28	1.06	0.78	0.95		0.2083	0.5235	0.2926	0.5168	0.4063	0.9683	0.209	0.785	0.8649	0.8434	0.1208	0.507	0.7682	0.9875		0.8487	0.9934	0.871	1.1158	0.851	0.8265	0.8756	0.9957		64	79	75	83	52	50
	4483		Vitamin B6 Metabolism	pyridoxate	LC/MS neg	31555	C00847	HMDB0000017	6723					3.66275	9.43	0.73	0.15	1.97		0.9497	0.8342	0.8868	0.7333	0.1416	0.9683	0.2764	0.7934	0.314	0.6781	0.2474	0.5865	0.34	0.8608		1.3604	4.7791	0.9161	8.6421	1.5641	1.8047	1.3235	4.9828		100	100	100	100	100	100
	4494	Xenobiotics	Benzoate Metabolism	hippurate	LC/MS neg	15753	C01586	HMDB0000714	464					1.47453	2.76	0.83	0.6	1.99		0.6364	0.7553	0.2058	0.4728	0.4399	0.9683	0.1739	0.7795	0.7047	0.7943	0.8207	0.7817	0.4045	0.878		1.5761	1.9814	1.0529	2.9098	1.9187	2.0992	1.7381	2.324		100	100	100	100	100	100
	4498			2-hydroxyhippurate (salicylurate)	LC/MS neg	18281	C07588	HMDB0000840	10253					55.272	69.96	4.57	0.02	0.29		0.0545	0.333	0.0193	0.24	0.5756	0.9683	0.0504	0.6507	0.1634	0.5888	0.0637	0.4717	0.3439	0.8621		1.1866	65.2884	1.8402	128.737	1.484	0.5329	2.4351	65.5858		93	93	100	83	90	83
	4500			3-hydroxyhippurate	LC/MS neg	39600		HMDB0006116	450268					0.85138	1.18	0.63	0.77	1.45		0.3665	0.6553	0.921	0.7421	0.6335	0.9683	0.6991	0.9195	0.7767	0.8226	0.7464	0.7607	0.3556	0.8621		1.4278	1.2676	1.1654	1.3698	1.3758	1.6901	1.0615	1.2156		93	86	88	83	100	100
	4502			4-hydroxyhippurate	LC/MS neg	35527		HMDB0013678	151012					1.3132	2.01	0.81	0.57	1.4		0.7013	0.776	0.7531	0.6953	0.0325	0.9124	0.0965	0.7173	0.1597	0.5888	0.058	0.4717	0.2237	0.7933		1.311	1.646	1.0927	2.1993	1.3866	1.5292	1.2439	1.7216		100	100	100	100	100	100
	4509			benzoate	LC/MS neg	15778	C00180	HMDB0001870	243					0.840433	0.75	0.96	1.04	0.81		0.6793	0.7672	0.4362	0.5941	0.878	0.9757	0.6736	0.9186	0.4844	0.7275	0.6708	0.7408	0.8613	0.9953		1.5072	1.454	1.6653	1.2428	1.3199	1.349	1.2907	1.2667		100	100	100	100	100	100
	4531			catechol sulfate	LC/MS neg	35320		HMDB0059724	3083879					2.05048	3.9	0.95	0.41	1.68		0.6417	0.7571	0.1733	0.4558	0.2097	0.9683	0.0825	0.6846	0.9331	0.8506	0.5474	0.6901	0.2491	0.8207		1.038	1.8973	0.7748	3.0198	1.2691	1.3012	1.237	2.1284		100	100	100	100	100	100
	4533			4-methylguaiacol sulfate	LC/MS neg	48418								0.453877	0.48	0.42	0.64	0.73		0.3949	0.6631	0.5743	0.6316	0.2193	0.9683	0.6486	0.9164	0.1817	0.5919	0.1226	0.507	0.7949	0.9875		2.7351	2.3357	3.1586	1.5128	1.6408	2.3116	0.97	1.2414		86	93	88	100	86	83
	4534			guaiacol sulfate	LC/MS neg	46111		HMDB0060013	22473					1.63464	3.46	0.84	0.55	2.29		0.299	0.6119	0.245	0.4943	0.1188	0.9683	0.0708	0.666	0.7553	0.8156	0.6839	0.7431	0.0841	0.7608		0.9689	1.3136	0.5888	2.0383	1.2391	1.349	1.1293	1.5838		100	100	100	100	100	100
	4535			3-methyl catechol sulfate (1)	LC/MS neg	46165			118431379					0.739202	0.76	0.73	1.75	1.84		0.067	0.3459	0.9797	0.7485	0.7067	0.9717	0.7874	0.9331	0.7923	0.8241	0.0976	0.507	0.3164	0.8429		1.3451	0.8353	0.9478	0.7228	1.5041	1.7423	1.2659	0.9943		86	86	88	83	95	83
	4537			4-ethylcatechol sulfate	LC/MS neg	63072								1.50302	0.79	2.22	2.77	0.99		0.3717	0.6565	0.9087	0.7412	0.5849	0.9683	0.7717	0.9278	0.6201	0.7658	0.2824	0.6091	0.8136	0.9933		1.5228	1.3718	1.5301	1.2135	2.4398	1.5155	3.3641	2.2888		100	100	100	100	100	100
	4538			4-methylcatechol sulfate	LC/MS neg	46146		HMDB0240459	54104170					0.719069	0.74	0.68	0.64	0.69		0.1138	0.4236	0.8601	0.7252	0.3947	0.9683	0.4903	0.8715	0.6109	0.7645	0.0713	0.4717	0.6118	0.955		1.7442	1.7969	2.0613	1.5326	1.2015	1.4272	0.9759	1.2542		100	100	100	100	100	100
	4539			4-allylcatechol sulfate	LC/MS neg	63597								2.3865	4.36	0.66	0.17	1.14		0.8234	0.8082	0.1953	0.4697	0.2901	0.9683	0.1175	0.7227	0.854	0.8389	0.3366	0.6229	0.5721	0.9343		1.8701	4.6803	1.7455	7.6151	1.6528	1.9947	1.3109	4.463		79	86	75	100	95	83
	4550			4-acetylphenol sulfate	LC/MS neg	44620			4684006					1.23279	2.09	0.7	0.53	1.61		0.5807	0.743	0.713	0.6838	0.5241	0.9683	0.8558	0.9338	0.452	0.7196	0.949	0.8091	0.426	0.8848		1.4305	1.6978	1.0974	2.2982	1.4962	1.7636	1.2288	1.7635		71	64	63	67	90	83
	4556			4-ethylphenylsulfate	LC/MS neg	36099	C13637	HMDB0062551	20822574					0.197722	0.06	0.3	6.21	1.27		0.2076	0.5235	0.028	0.2667	0.6705	0.9683	0.0761	0.666	0.1692	0.5888	0.2075	0.559	0.5692	0.9343		13.4259	6.2834	11.8308	0.7359	9.7972	15.021	4.5734	2.6546		100	100	100	100	100	100
	4558			4-vinylphenol sulfate	LC/MS neg	36098	C05627	HMDB0062775	6426766					1.80947	2.09	1.73	3.07	3.69		0.0222	0.2868	0.3266	0.539	0.3229	0.9683	0.1892	0.785	0.9954	0.8588	0.301	0.6091	0.0291	0.6845		1.2964	0.8525	0.5526	1.1523	2.7897	2.0401	3.5394	2.3458		100	100	100	100	100	100
	4563			4-vinylcatechol sulfate	LC/MS neg	64579								3.41892	1.14	5.06	6.21	1.4		0.3989	0.6658	0.5656	0.6291	0.2948	0.9683	0.7472	0.9224	0.2262	0.6313	0.1597	0.5365	0.8887	0.9977		1.1828	1.0543	0.9876	1.121	4.1724	1.378	6.9668	4.0439		93	93	88	100	100	100
	4573			3-(2-hydroxyphenyl)propionate	LC/MS neg	35634	C01198	HMDB0033752	6930705					0.667622	0.7	0.65	1.31	1.4		0.0257	0.2868	0.0351	0.2939	0.5651	0.9683	0.285	0.7934	0.045	0.4259	0.1959	0.5495	0.0587	0.7604		1.291	0.9103	1.0737	0.7468	1.2427	1.5082	0.9771	0.8619		79	64	63	67	90	100
	4574			3-methoxycatechol sulfate (1)	LC/MS neg	48763			129892430					1.30002	1.64	1.18	2.05	2.84		0.0072	0.2103	0.7961	0.7	0.9969	0.9823	0.8603	0.9338	0.8486	0.8387	0.0391	0.4204	0.0625	0.7604		1.2746	0.8749	0.6632	1.0865	2.0568	1.8861	2.2275	1.657		86	86	75	100	100	100
	4577			methyl-4-hydroxybenzoate sulfate	LC/MS neg	48429		HMDB0041646	10657183					0.106551	0.09	0.26	0.3	0.1		0.3002	0.6119	0.0454	0.3072	0.8208	0.9752	0.1308	0.7276	0.1737	0.5888	0.5406	0.6863	0.3964	0.878		47.5078	46.9428	86.1089	7.7768	5.627	8.9067	2.3473	5.062		100	100	100	100	100	100
	4579			propyl 4-hydroxybenzoate sulfate	LC/MS neg	48460		HMDB0135261	131838881					0.275111	0.27	0.29	0.09	0.08		0.1409	0.4711	0.2238	0.482	0.818	0.9752	0.5034	0.8788	0.2776	0.6561	0.2007	0.5522	0.3975	0.878		4.8435	5.7101	8.9646	2.4555	0.4659	0.7224	0.2094	1.3325		57	50	50	50	29	67
	4585			p-cresol sulfate	LC/MS neg	36103		HMDB0011635	4615423					1.11707	1.26	0.99	0.89	1.14		0.9781	0.8346	0.766	0.6969	0.4674	0.9683	0.4923	0.8715	0.7461	0.8096	0.5992	0.7219	0.6121	0.955		0.9695	1.027	0.9072	1.1467	1.0255	1.0318	1.0193	1.083		100	100	100	100	100	100
	4592			o-cresol sulfate	LC/MS neg	36845		HMDB0011635	11615528					0.774102	0.58	0.95	1.74	1.06		0.2526	0.5665	0.2695	0.5038	0.2908	0.9683	0.1502	0.743	0.9705	0.8569	0.1029	0.507	0.9517	1		1.309	1.0041	1.2682	0.74	1.3182	1.3499	1.2866	1.0133		100	100	100	100	100	100
	4601			3-(3-hydroxyphenyl)propionate sulfate	LC/MS neg	45415		HMDB0094710	187488					1.81344	2.34	1.28	0.54	0.99		0.3807	0.6576	0.246	0.4943	0.2317	0.9683	0.1172	0.7227	0.9779	0.8575	0.1238	0.507	0.826	0.9953		0.7558	1.268	0.7584	1.7777	0.8584	0.7533	0.9636	1.3706		50	50	38	67	52	67
	4604			3-(3-hydroxyphenyl)propionate	LC/MS neg	35635	C11457	HMDB0000375	91					0.69095	0.87	0.57	0.94	1.45		0.712	0.7761	0.9304	0.7446	0.6462	0.9683	0.7139	0.9215	0.7802	0.8226	0.9461	0.8084	0.5789	0.9369		1.2752	0.9758	1.0427	0.9088	1.1805	1.5077	0.8534	0.8811		50	57	50	67	62	50
	4607			3-phenylpropionate (hydrocinnamate)	LC/MS neg	15749	C05629	HMDB0000764	107					1.42599	0.94	1.85	2.26	1.14		0.063	0.3419	0.6117	0.647	0.3447	0.9683	0.7664	0.9263	0.2779	0.6561	0.0381	0.4189	0.5206	0.917		0.9026	0.8161	0.8428	0.7894	1.3736	0.9624	1.7848	1.2871		100	100	100	100	100	100
	4617			2-methoxyhydroquinone sulfate (1)	LC/MS neg	64049								2.28274	1.98	2.46	2.1	1.69		0.0979	0.3994	0.0788	0.353	0.8739	0.9757	0.2747	0.7934	0.1481	0.5841	0.1715	0.5413	0.3076	0.8407		0.6299	0.6973	0.4678	0.9268	1.3706	0.7921	1.949	1.4379		57	64	50	83	90	67
	4618			2-methoxyhydroquinone sulfate (2)	LC/MS neg	64050								1.5213	1.85	1.32	1.2	1.67		0.3951	0.6631	0.2749	0.5063	0.385	0.9683	0.191	0.785	0.864	0.8434	0.9888	0.8124	0.2511	0.8209		0.6574	0.7011	0.4917	0.9105	0.9564	0.823	1.0898	1.0001		43	50	38	67	52	50
	4623		Xanthine Metabolism	caffeine	LC/MS pos early	569	C07481	HMDB0001847	2519					1.23915	1.25	1.24	2	2.02		0.0625	0.3419	0.5585	0.6291	0.9214	0.978	0.6462	0.9164	0.7146	0.7978	0.1791	0.5483	0.1827	0.7608		0.7004	0.5211	0.4642	0.578	1.0472	0.9365	1.1579	0.8679		86	93	88	100	90	83
	4624			paraxanthine	LC/MS neg	18254	C13747	HMDB0001860	4687					1.16167	1.15	1.17	1.66	1.63		0.0534	0.333	0.8821	0.7321	0.7531	0.9752	0.7562	0.9257	0.9006	0.8465	0.0911	0.507	0.2655	0.8277		0.8103	0.6614	0.6158	0.707	1.0902	1.0049	1.1756	0.9413		71	71	63	83	86	83
	4625			theobromine	LC/MS pos early	18392	C07480	HMDB0002825	5429					1.03472	3.73	0.48	0.62	4.85		0.3155	0.6209	0.072	0.3499	0.1012	0.9683	0.0235	0.6452	0.8971	0.8465	0.6195	0.7284	0.0788	0.7608		1.5294	1.2375	0.5227	1.9522	1.8744	2.5361	1.2127	1.5825		86	93	88	100	95	83
	4626			theophylline	LC/MS neg	18394	C07130	HMDB0001889	2153					1.27064	1.28	1.27	1.89	1.91		0.0463	0.3287	0.7999	0.7014	0.9803	0.9807	0.878	0.9396	0.8347	0.8351	0.1252	0.507	0.1787	0.7608		0.8757	0.6859	0.6028	0.7689	1.3026	1.1487	1.4565	1.1127		79	86	75	100	90	83
	4627			1-methylurate	LC/MS pos early	34395	C16359	HMDB0003099	69726					1.31128	1.39	1.27	1.82	1.99		0.1105	0.4137	0.6922	0.6771	0.7983	0.9752	0.9248	0.9453	0.6255	0.7678	0.164	0.5365	0.3599	0.8621		0.8767	0.7005	0.5864	0.8146	1.3259	1.1671	1.4846	1.1496		71	64	63	67	86	83
	4628			7-methylurate	LC/MS neg	39598	C16355	HMDB0011107	69160					1.93771	2.8	1.37	0.75	1.53		0.9038	0.8282	0.1081	0.4006	0.3486	0.9683	0.0903	0.7031	0.6018	0.7634	0.5382	0.6854	0.4768	0.8977		0.6646	0.9996	0.5258	1.4734	0.9528	0.8035	1.1022	1.2878		36	43	25	67	57	50
	4629			1,3-dimethylurate	LC/MS neg	32391		HMDB0001857	70346					1.09179	0.8	1.28	2.55	1.59		0.0308	0.3019	0.9723	0.7485	0.8191	0.9752	0.8597	0.9338	0.8843	0.8441	0.071	0.4717	0.1827	0.7608		0.5883	0.4079	0.4538	0.362	0.8227	0.7227	0.9226	0.6423		71	57	63	50	86	83
	4630			1,7-dimethylurate	LC/MS neg	34400	C16356	HMDB0011103	91611					1.01936	1.04	1.01	2.19	2.26		0.0906	0.3878	0.5477	0.6244	0.8716	0.9757	0.6087	0.9145	0.7409	0.8092	0.244	0.5865	0.2097	0.7854		0.9763	0.6107	0.5981	0.6234	1.3608	1.3546	1.367	0.9952		79	86	75	100	95	83
	4631			3,7-dimethylurate	LC/MS neg	34399	C16360	HMDB0001982	83126					1.14571	3.78	0.54	0.62	4.35		0.1996	0.5235	0.4555	0.597	0.0917	0.9683	0.1041	0.7173	0.4657	0.7202	0.7493	0.7625	0.0492	0.7556		1.3877	1.24	0.5183	1.9617	1.7375	2.2571	1.218	1.5899		71	71	63	83	76	83
	4632			1,3,7-trimethylurate	LC/MS neg	34404	C16361	HMDB0002123	79437					1.32577	1.34	1.32	2.03	2.06		0.0367	0.3019	0.6217	0.6526	0.742	0.9752	0.9119	0.9453	0.5379	0.7407	0.0686	0.4717	0.2237	0.7933		0.6615	0.5051	0.432	0.5782	1.0333	0.8909	1.1757	0.877		64	50	50	50	86	83
	4633			1-methylxanthine	LC/MS neg	34389	C16358	HMDB0010738	80220					1.27855	1	1.5	1.9	1.26		0.3916	0.6625	0.7793	0.6979	0.3703	0.9683	0.6772	0.9186	0.3783	0.6972	0.1921	0.5486	0.9786	1		1.0508	0.929	0.9307	0.9273	1.4652	1.1708	1.7596	1.3435		64	64	63	67	76	67
	4634			3-methylxanthine	LC/MS neg	32445	C16357	HMDB0001886	70639					0.952972	3.74	0.42	0.58	5.18		0.5027	0.7176	0.2257	0.4825	0.1273	0.9683	0.0695	0.666	0.8056	0.8306	0.51	0.6752	0.1422	0.7608		1.4672	1.1247	0.4749	1.7746	1.7407	2.4596	1.0217	1.3982		71	79	75	83	86	67
	4635			7-methylxanthine	LC/MS pos early	34390	C16353	HMDB0001991	68374					1.08126	4.23	0.45	0.54	5.03		0.3139	0.6205	0.1764	0.4558	0.0624	0.9683	0.0335	0.6452	0.6831	0.787	0.5004	0.6731	0.0562	0.7604		1.8102	1.5705	0.6005	2.5405	2.1969	3.0199	1.374	1.9573		79	86	75	100	95	83
	4636			5-acetylamino-6-amino-3-methyluracil	LC/MS polar	34424	C16366	HMDB0004400	88299					0.801949	0.78	0.81	2.01	1.92		0.0855	0.3822	0.7448	0.6946	0.7772	0.9752	0.9772	0.9453	0.6484	0.7814	0.1322	0.507	0.325	0.8486		1.5087	0.9183	1.0328	0.8038	1.8003	1.9847	1.616	1.2099		86	93	88	100	90	83
	4643		Tobacco Metabolite	cotinine	LC/MS pos early	553		HMDB0001046	408					0.934594	1	0.89	1.47	1.64		0.1724	0.4948	0.7903	0.6989	0.7903	0.9752	1	0.9453	0.6901	0.7876	0.4038	0.6317	0.2726	0.8294		0.3807	0.2882	0.2882	0.2882	0.4482	0.4731	0.4233	0.3558		7	0	0	0	19	17
	4647			3-hydroxycotinine glucuronide	LC/MS neg	43470		HMDB0001204	53477725					1.12117	1	1.21	1.71	1.42		0.2515	0.5665	0.9474	0.7446	0.9474	0.978	1	0.9453	0.9212	0.8491	0.4148	0.638	0.4138	0.8791		0.4861	0.402	0.402	0.402	0.629	0.5701	0.688	0.545		7	0	0	0	19	17
	4657			2-hydroxyfluorene sulfate	LC/MS neg	62528								1.21856	1	1.41	1.61	1.14		0.3129	0.6205	0.7391	0.6932	0.7391	0.9752	1	0.9453	0.6178	0.7658	0.315	0.614	0.6468	0.955		0.5152	0.4814	0.4814	0.4814	0.6616	0.549	0.7742	0.6278		7	0	0	0	19	17
	4662		Food Component/Plant	maltol sulfate	LC/MS neg	48696								2.60602	3.13	1.87	0.42	0.71		0.7748	0.7923	0.3368	0.5473	0.6963	0.9717	0.3653	0.846	0.6656	0.7834	0.6123	0.7269	0.9441	1		0.6815	1.6469	0.798	2.4958	0.8106	0.565	1.0562	1.776		43	43	38	50	62	50
	4669			2-piperidinone	LC/MS pos early	43400		HMDB0011749	12665					2.03745	2.3	1.9	1.54	1.87		0.0528	0.333	0.391	0.5708	0.802	0.9752	0.6818	0.919	0.4061	0.7092	0.0992	0.507	0.2467	0.8207		1.0654	1.2275	0.7437	1.7113	2.0086	1.3871	2.6301	2.1707		100	100	100	100	100	100
	4715			sucralose	LC/MS neg	36649	C12285	HMDB0031554	71485					0.81855	0.16	5.09	5.09	0.16		0.9465	0.8342	0.9465	0.7446	0.0156	0.8182	0.1048	0.7173	0.0578	0.4636	0.0578	0.4717	0.1048	0.7608		0.9628	0.9628	1.6668	0.2587	0.7881	0.2587	1.3175	0.7881		21	21	38	0	48	0
	4749			ginkgolic acid C15:1	LC/MS polar	64200	C10794		5281858					3.43258	2.13	4.73	2.22	1		0.8982	0.8273	0.2863	0.5113	0.8982	0.9776	0.4216	0.8601	0.4787	0.7273	0.8479	0.7865	1	1		0.1283	0.201	0.1283	0.2736	0.3678	0.1283	0.6072	0.4404		0	7	0	17	10	0
	4750			(15:2)-anacardic acid	LC/MS neg	41397		HMDB0033896	11824131					1.40841	1	1.82	1.82	1		0.5997	0.743	0.5997	0.6422	0.5997	0.9683	1	0.9453	0.4324	0.7092	0.4324	0.647	1	1		0.1403	0.1403	0.1403	0.1403	0.1976	0.1403	0.2549	0.1976		0	7	0	17	5	0
	4780			levulinate (4-oxovalerate)	LC/MS neg	22177		HMDB0000720	11579					0.890746	0.53	1.47	1.75	0.62		0.7647	0.791	0.7562	0.6953	0.301	0.9683	0.3669	0.846	0.5835	0.756	0.3178	0.6143	0.6185	0.955		1.0709	1.0059	1.3182	0.6936	1.0188	0.8235	1.2142	0.9539		50	50	50	50	57	50
	4782			levulinoylcarnitine	LC/MS pos early	63359								0.947959	0.87	1.03	1.11	0.94		0.8814	0.8233	0.9175	0.7421	0.6954	0.9717	0.7398	0.9224	0.8288	0.8351	0.8555	0.7876	0.7169	0.983		0.8647	0.8344	0.8935	0.7753	0.85	0.836	0.864	0.8197		71	71	75	67	67	67
	4805			2,3-dihydroxyisovalerate	LC/MS polar	38276	C04039	HMDB0012141	677					3.69584	9.25	1.84	0.59	2.99		0.9418	0.8342	0.0009	0.1476	0.0399	0.9368	0.0005	0.5575	0.2633	0.6546	0.1305	0.507	0.1469	0.7608		0.9061	2.3288	0.4545	4.2031	1.9261	1.3577	2.4944	3.3488		93	100	100	100	95	83
	4806			2,3-dihydroxypyridine	LC/MS pos early	21132			28115					0.858916	0.65	1.09	1.47	0.88		0.6769	0.7671	0.6736	0.6694	0.4845	0.9683	0.4531	0.8701	0.8337	0.8351	0.404	0.6317	0.8486	0.9953		0.8619	0.7578	0.9159	0.5997	0.8444	0.8079	0.8808	0.7403		57	50	63	33	52	50
	4813			2-isopropylmalate	LC/MS polar	15667	C02504	HMDB0000402	77					1.095	1.47	0.83	0.79	1.41		0.8269	0.8094	0.5122	0.6185	0.5314	0.9683	0.9841	0.9453	0.3386	0.6956	0.7591	0.7662	0.5711	0.9343		1.4579	1.4968	1.212	1.7816	1.5575	1.7038	1.4112	1.5964		100	100	100	100	100	100
	4818			3-formylindole	LC/MS pos early	62863	C08493	HMDB29737	10256					1.01485	0.92	1.09	1.43	1.2		0.0552	0.333	0.919	0.7421	0.7602	0.9752	0.7848	0.9328	0.8786	0.8441	0.0944	0.507	0.2671	0.8277		1.0839	0.9437	0.9835	0.904	1.2402	1.1843	1.296	1.1		100	100	100	100	100	100
	4837			5-hydroxymethyl-2-furoylcarnitine*	LC/MS pos early	62871								2.45256	4.02	1.21	0.38	1.25		0.7403	0.7815	0.1332	0.4255	0.3297	0.9683	0.0994	0.7173	0.6818	0.787	0.3282	0.6183	0.663	0.9628		0.5049	1.1235	0.4479	1.7991	0.6197	0.5619	0.6775	1.2383		14	21	13	33	33	17
	4838			gluconate	LC/MS polar	587	C00257	HMDB0000625	3085666;10690					1.03223	1.03	1.03	0.8	0.8		0.0318	0.3019	0.8419	0.7175	0.9014	0.9776	0.9596	0.9453	0.8084	0.8306	0.1213	0.507	0.1214	0.7608		1.0239	1.1547	1.1366	1.1728	0.926	0.9111	0.9409	1.0569		100	100	100	100	100	100
	4845			4-acetylcatechol sulfate (1)	LC/MS neg	62798								0.819734	0.77	0.86	1.52	1.36		0.3876	0.6614	0.5347	0.6232	0.6563	0.9683	0.4754	0.8715	0.8944	0.8465	0.3278	0.6183	0.7764	0.9875		0.9486	0.7102	0.8043	0.6161	1.016	1.0929	0.9391	0.7776		86	79	88	67	81	83
	4846			4-acetylcatechol sulfate (2)	LC/MS neg	62799								1.42082	1.66	1.28	1.3	1.69		0.175	0.4958	0.357	0.5591	0.6497	0.9683	0.7514	0.9224	0.304	0.6745	0.1759	0.5421	0.5375	0.922		0.6245	0.6179	0.4647	0.7711	0.8938	0.7843	1.0034	0.8873		50	36	38	33	76	67
	4850			N-acetylalliin	LC/MS neg	45404								3.98474	7.05	1.37	0.23	1.17		0.7089	0.7761	0.1569	0.4527	0.3601	0.9683	0.1205	0.7227	0.6982	0.7918	0.335	0.6229	0.7136	0.9808		0.4128	1.5308	0.3804	2.6811	0.5269	0.4451	0.6087	1.6449		29	21	13	33	57	50
	4867			dihydrocaffeate sulfate (2)	LC/MS polar	62524								1.14591	1.21	1.1	1.49	1.64		0.951	0.8342	0.3266	0.539	0.8142	0.9752	0.4142	0.8592	0.5728	0.7539	0.8241	0.7817	0.9073	1		1.3077	1.0985	0.9919	1.2051	1.7078	1.6235	1.792	1.4985		93	93	88	100	90	100
	4886			cinnamoylglycine	LC/MS neg	38637		HMDB0011621	709625					1.93366	2.65	1.36	0.64	1.24		0.6885	0.7714	0.2381	0.4867	0.6419	0.9683	0.2705	0.7934	0.5863	0.7573	0.9615	0.8101	0.5618	0.934		0.7944	1.2931	0.7094	1.8768	1.0373	0.8794	1.1953	1.5361		71	64	63	67	90	83
	4907			genistein sulfate*	LC/MS neg	62061								0.135226	0.43	0.1	1.66	7.44		0.2863	0.6034	0.094	0.38	0.3192	0.9683	0.6348	0.9145	0.0484	0.4259	0.957	0.8101	0.1694	0.7608		1.374	0.2326	0.3256	0.1396	1.3273	2.4225	0.2321	0.1858		43	29	38	17	33	50
	4912			dihydroferulate	LC/MS neg	40481		HMDB0062121	14340					1.451	0.88	1.9	2.75	1.27		0.1854	0.5077	0.6566	0.6683	0.36	0.9683	0.7495	0.9224	0.3094	0.6766	0.0968	0.507	0.7772	0.9875		0.6235	0.5165	0.5501	0.4829	1.0117	0.6969	1.3265	0.9047		64	64	63	67	67	67
	4913			dihydroferulic acid sulfate	LC/MS neg	62857		HMDB0041724	187489					0.880054	10.26	0.4	0.77	19.6		0.2664	0.5826	0.473	0.6063	0.0142	0.8182	0.0331	0.6452	0.1701	0.5888	0.2796	0.6091	0.0178	0.6553		2.2235	1.2157	0.2159	2.2154	2.9646	4.2311	1.6981	1.9568		64	71	63	83	76	67
	4921			enterolactone sulfate	LC/MS neg	64041		HMDB0240506 HMDB0240505						1.16909	1.53	0.86	0.67	1.18		0.5362	0.7265	0.4213	0.5902	0.0384	0.9368	0.0547	0.6604	0.3202	0.6801	0.0448	0.4429	0.3106	0.8421		0.8723	1.0121	0.8	1.2243	0.88	0.9446	0.8153	1.0198		21	21	13	33	19	33
	4926			ergothioneine	LC/MS pos early	37459	C05570	HMDB0003045	5351619					1.61195	2.02	1.34	0.97	1.47		0.1575	0.4918	0.067	0.343	0.2887	0.9683	0.0546	0.6604	0.5437	0.7428	0.7839	0.7729	0.0999	0.7608		0.837	1.023	0.6781	1.368	1.1632	0.996	1.3304	1.3492		100	100	100	100	100	100
	4928			erythritol	LC/MS polar	20699	C00503	HMDB0002994	222285					1.44612	1.1	1.76	1.75	1.1		0.3199	0.6246	0.3458	0.5524	0.5923	0.9683	0.782	0.9328	0.2697	0.6561	0.2533	0.5892	0.7549	0.9875		0.9948	0.9961	0.9466	1.0456	1.4374	1.043	1.8317	1.4386		100	100	100	100	100	100
	4930			3-ethylcatechol sulfate (1)	LC/MS neg	62796								0.992811	0.94	1.03	1.61	1.47		0.2483	0.5626	0.9901	0.7506	0.6412	0.9683	0.7606	0.9257	0.7195	0.801	0.226	0.5768	0.6392	0.955		0.9459	0.7425	0.7645	0.7204	1.1426	1.1273	1.1578	0.9391		50	50	50	50	76	50
	4931			3-ethylcatechol sulfate (2)	LC/MS neg	62797								0.893561	1.11	0.79	1.41	1.99		0.0517	0.333	0.703	0.6815	0.6644	0.9683	0.9718	0.9453	0.5417	0.7421	0.2433	0.5865	0.1088	0.7608		0.8324	0.5866	0.5561	0.6171	0.9895	1.1086	0.8705	0.7438		50	29	38	17	71	67
	4934			ferulic acid 4-sulfate	LC/MS neg	47114		HMDB0029200	6305574					2.34314	5.06	1.28	0.65	2.56		0.2818	0.599	0.0287	0.2699	0.2393	0.9683	0.0257	0.6452	0.4182	0.7092	0.938	0.806	0.1338	0.7608		0.6286	1.0689	0.3528	1.785	1.0326	0.9044	1.1607	1.4729		57	64	50	83	76	67
	4935			ferulylglycine (1)	LC/MS neg	54936								1.16731	1	1.29	1.74	1.36		0.1662	0.4944	0.608	0.6449	0.5076	0.9683	0.9194	0.9453	0.3796	0.6972	0.1275	0.507	0.6196	0.955		0.7746	0.6582	0.6568	0.6596	1.0207	0.8925	1.1488	0.9042		43	43	50	33	67	33
	4938			quinate	LC/MS polar	18335	C00296	HMDB0003072	6508					1.03287	1.16	0.94	1.19	1.47		0.9765	0.8346	0.5432	0.6242	0.6428	0.9683	0.9225	0.9453	0.4228	0.7092	0.7112	0.7491	0.7705	0.9875		1.2353	1.0824	1.0005	1.1643	1.4288	1.4701	1.3875	1.2759		86	93	88	100	90	83
	4939			feruloylquinate (1)	LC/MS neg	63399								1.17178	1.2	1.14	0.85	0.89		0.9498	0.8342	0.9423	0.7446	0.8376	0.9752	0.8524	0.9336	0.9207	0.8491	0.9151	0.8011	0.8574	0.9953		0.6357	0.7383	0.6711	0.8055	0.6423	0.6004	0.6843	0.7449		50	50	50	50	52	50
	4940			feruloylquinate (2)	LC/MS neg	63400								1.12084	1.2	1.04	0.85	0.98		0.9596	0.8346	0.874	0.7308	0.825	0.9752	0.799	0.9331	0.9626	0.8549	0.8385	0.7865	0.9089	1		0.7249	0.8056	0.7335	0.8776	0.7318	0.7163	0.7474	0.8125		50	50	50	50	57	50
	4942			feruloylquinate (4)	LC/MS neg	63402								1.00493	0.98	1.03	0.91	0.87		0.9101	0.8282	0.7743	0.6979	0.6115	0.9683	0.5943	0.9135	0.8678	0.8434	0.7666	0.769	0.677	0.9673		0.67	0.7118	0.7178	0.7058	0.6316	0.6222	0.6409	0.6733		50	50	50	50	48	50
	4964			histidine betaine (hercynine)*	LC/MS pos early	62278		HMDB0029422	3083620					1.29952	1.77	0.95	0.73	1.35		0.7165	0.7761	0.1287	0.4239	0.1488	0.9683	0.0499	0.6507	0.9525	0.8516	0.4097	0.6332	0.2246	0.7933		0.8627	1.014	0.7329	1.295	0.9699	0.9925	0.9473	1.1211		79	86	75	100	95	83
	4966			homostachydrine*	LC/MS pos early	33009	C08283	HMDB0033433	441447					5.53432	8.64	2.03	0.21	0.89		0.0774	0.362	0.0034	0.1476	0.3998	0.9683	0.0112	0.6452	0.0923	0.5004	0.0532	0.4717	0.5189	0.917		0.6964	3.5562	0.7375	6.3749	0.9943	0.6553	1.3333	3.8541		100	100	100	100	100	100
	4971			indolin-2-one	LC/MS pos early	43374	C12312		321710					1.16687	1.13	1.19	1.37	1.31		0.1251	0.4459	0.5526	0.6267	0.8367	0.9752	0.794	0.9331	0.5489	0.7437	0.1906	0.5485	0.3658	0.8621		0.9618	0.8902	0.8344	0.9459	1.1939	1.0891	1.2987	1.1223		100	93	100	83	100	100
	4992			mannonate*	LC/MS polar	62864			3246006					1.01966	0.84	1.21	1.36	0.95		0.5719	0.743	0.9641	0.7473	0.146	0.9683	0.3395	0.8351	0.2579	0.6517	0.132	0.507	0.5416	0.9265		1.0378	0.9812	1.0666	0.8958	1.1148	1.0091	1.2206	1.0582		100	100	100	100	100	100
	4996			menthol glucuronide	LC/MS neg	64873								2.92259	0.84	5.78	5.04	0.73		0.6928	0.772	0.1455	0.4379	0.3228	0.9683	0.7453	0.9224	0.0704	0.4655	0.3006	0.6091	0.6872	0.9697		0.8733	0.9272	1.0093	0.8451	2.4984	0.7372	4.2595	2.5523		79	86	75	100	95	83
	4997			methyl indole-3-acetate	LC/MS neg	1584		HMDB0029738	74706					1.35863	1.55	1.24	1.31	1.64		0.1472	0.4767	0.1025	0.3911	0.8252	0.9752	0.2107	0.785	0.282	0.6561	0.3505	0.6302	0.2603	0.8277		0.9252	0.8943	0.702	1.0866	1.2879	1.1484	1.4273	1.257		79	79	75	83	90	83
	5001			N-(2-furoyl)glycine	LC/MS neg	31536		HMDB0000439	21863					1.55987	2.16	1.06	0.59	1.21		0.3269	0.63	0.7069	0.6815	0.616	0.9683	0.9325	0.9453	0.5112	0.7365	0.2684	0.5999	0.7449	0.9875		1.0606	1.5172	0.9594	2.0749	1.1979	1.1619	1.234	1.6544		71	64	63	67	86	83
	5006			naringenin 7-glucuronide	LC/MS neg	54924								0.302513	1	0.18	1	5.61		0.1706	0.4944	0.1706	0.455	0.1706	0.9683	1	0.9453	0.0435	0.4259	1	0.8124	0.0692	0.7604		0.2228	0.0674	0.0674	0.0674	0.2228	0.3783	0.0674	0.0674		7	7	0	17	5	17
	5033			phytanate	LC/MS neg	598	C01607	HMDB0000801	26840					0.70084	0.85	0.59	0.91	1.32		0.8568	0.8164	0.8475	0.7198	0.7073	0.9717	0.7034	0.9195	0.8905	0.8457	0.6769	0.7431	0.8958	1		1.905	1.5178	1.6393	1.3964	1.7222	2.1707	1.2737	1.3351		93	93	88	100	100	100
	5039			piperine	LC/MS pos late	33935	C03882	HMDB0029377	638024					4.08853	3.23	4.84	1.71	1.15		0.3528	0.65	0.002	0.1476	0.5301	0.9683	0.076	0.666	0.0052	0.2463	0.2455	0.5865	0.8375	0.9953		0.6292	1.2408	0.5864	1.8952	1.9608	0.672	3.2497	2.5725		86	93	88	100	95	83
	5042			glucuronide of piperine metabolite C17H21NO3 (3)*	LC/MS neg	62290								2.70192	1.74	3.59	2.23	1.08		0.2319	0.5512	0.029	0.2704	0.3679	0.9683	0.3633	0.846	0.0225	0.3447	0.1198	0.507	0.8389	0.9953		0.5512	0.7258	0.5299	0.9217	1.3147	0.5726	2.0568	1.4893		57	71	63	83	76	50
	5043			glucuronide of piperine metabolite C17H21NO3 (4)*	LC/MS neg	62291								1.08379	1	1.17	1.17	1		0.5216	0.722	0.5567	0.6291	0.5567	0.9683	1	0.9453	0.3797	0.6972	0.3587	0.6317	0.9713	1		0.8867	0.8849	0.8849	0.8849	0.9628	0.8886	1.037	0.961		7	7	0	17	14	17
	5044			glucuronide of piperine metabolite C17H21NO3 (5)*	LC/MS neg	62292								3.30395	2.85	3.62	1.82	1.43		0.0883	0.3862	0.0039	0.1522	0.5608	0.9683	0.1001	0.7173	0.0092	0.2728	0.0881	0.507	0.4377	0.8882		0.4731	0.7477	0.3887	1.1068	1.2884	0.5575	2.0194	1.5631		64	79	63	100	90	67
	5051			sulfate of piperine metabolite C16H19NO3 (2)*	LC/MS neg	62295								3.29618	3.21	3.34	2.08	2		0.0923	0.3878	0.0032	0.1476	0.6215	0.9683	0.0804	0.6833	0.0094	0.2728	0.1036	0.507	0.4124	0.878		0.5105	0.7168	0.3402	1.0935	1.4764	0.6809	2.2719	1.6827		64	79	63	100	90	67
	5052			sulfate of piperine metabolite C16H19NO3 (3)*	LC/MS neg	62296								3.29405	2.98	3.46	2.2	1.89		0.1981	0.5235	0.0048	0.1583	0.493	0.9683	0.1261	0.7227	0.0088	0.2722	0.142	0.5184	0.6796	0.9679		0.5999	0.8255	0.4149	1.2361	1.7505	0.7849	2.716	1.9761		79	86	75	100	95	83
	5057			sulfate of piperine metabolite C18H21NO3 (1)*	LC/MS neg	62297								2.89407	2.91	2.89	2.43	2.45		0.0024	0.149	0.0019	0.1476	0.6447	0.9683	0.0582	0.6604	0.0068	0.2642	0.0081	0.268	0.0657	0.7604		0.4437	0.5027	0.2571	0.7482	1.2251	0.6303	1.82	1.2841		71	79	63	100	95	83
	5059			sulfate of piperine metabolite C18H21NO3 (3)*	LC/MS neg	62299								2.35798	1.72	2.8	2.33	1.43		0.0194	0.2868	0.0069	0.1715	0.2124	0.9683	0.2852	0.7934	0.0038	0.2381	0.0086	0.268	0.4296	0.888		0.4327	0.4843	0.3556	0.6131	0.9686	0.5098	1.4275	1.0203		43	36	25	50	86	67
	5075			saccharin	LC/MS neg	21151	C12283	HMDB0029723	5143					4.2148	1.95	4.53	16.71	7.2		0.2468	0.5626	0.6521	0.6683	0.5568	0.9683	0.4868	0.8715	0.9178	0.8491	0.6631	0.7408	0.243	0.8171		1.9455	0.7004	0.4748	0.9261	9.4449	3.4162	15.4737	8.1999		36	50	25	83	62	50
	5077			acesulfame	LC/MS neg	48569		HMDB0033585	36573					0.953146	0.08	1.16	59.32	4.16		0.0303	0.3019	0.9659	0.7473	0.4222	0.9683	0.6091	0.9145	0.5254	0.7385	0.0276	0.4109	0.336	0.8563		0.3671	0.077	0.1424	0.0116	0.6399	0.5918	0.6881	0.3499		21	14	13	17	48	33
	5078			S-allylcysteine	LC/MS pos early	43239		HMDB0034323	98280					4.91056	7.37	2.94	0.5	1.25		0.6779	0.7671	0.0789	0.353	0.6479	0.9683	0.1366	0.7398	0.3171	0.6798	0.9752	0.811	0.5591	0.9318		1.0812	4.0248	0.9615	7.0881	2.3658	1.201	3.5306	5.3093		57	71	50	100	81	67
	5097			stachydrine	LC/MS pos early	34384	C10172	HMDB0004827	115244					1.34961	19.04	0.58	0.7	22.93		0.2662	0.5826	0.3403	0.5497	0.3023	0.9683	0.1857	0.7815	0.9523	0.8516	0.9506	0.8091	0.1535	0.7608		12.0489	10.0911	1.0069	19.1753	18.219	23.0909	13.3472	16.2613		100	100	100	100	100	100
	5098			3-hydroxystachydrine*	LC/MS pos early	62062	C10151		46173781					5.51154	111.7	1.8	0.46	28.6		0.5532	0.7389	0.3405	0.5497	0.5873	0.9683	0.3169	0.8202	0.7551	0.8156	0.9697	0.811	0.4471	0.8935		1.3082	4.9812	0.0884	9.8739	3.5373	2.528	4.5465	7.2102		29	29	25	33	38	33
	5107			tartarate	LC/MS neg	15336	C00552 C00898 C02107	HMDB0062642 HMDB0000956	444305;875					0.866591	0.55	1.44	1.43	0.55		0.5318	0.7265	0.7473	0.6953	0.5445	0.9683	0.8482	0.9333	0.4871	0.7286	0.3576	0.6317	0.9896	1		2.628	2.6343	3.3942	1.8744	2.2712	1.8619	2.6805	2.2774		100	100	100	100	90	100
	5108			theanine	LC/MS pos early	22206	C01047	HMDB0034365	439378					9.93989	18.89	1	0.05	1		0.1706	0.4944	0.1706	0.455	0.1706	0.9683	0.0692	0.666	1	0.8588	0.0435	0.4336	1	1		0.0183	0.1819	0.0183	0.3456	0.0183	0.0183	0.0183	0.1819		0	14	0	33	0	0
	5111			thymol sulfate	LC/MS neg	36095	C09908	HMDB0062720	12456386					2.07575	0.3	3.88	12.77	0.98		0.0803	0.366	0.0895	0.3753	0.9604	0.978	0.2621	0.7909	0.1861	0.598	0.1733	0.5413	0.2472	0.8207		4.2216	2.7638	4.2543	1.2732	10.2208	4.1889	16.2527	8.763		93	100	100	100	95	83
	5122			4-allylphenol sulfate	LC/MS neg	37181			66633409					0.429675	0.26	1.95	0.87	0.11		0.9189	0.8298	0.1605	0.4541	0.6698	0.9683	0.2195	0.785	0.4557	0.7202	0.8074	0.7794	0.723	0.9846		4.3626	4.9195	7.8328	2.0062	1.3176	0.8924	1.7428	1.8745		93	93	88	100	100	100
	5123			ethyl alpha-glucopyranoside	LC/MS pos early	63152		HMDB0029968	11127487					3.07513	18.28	1.9	1.34	12.91		0.0622	0.3419	0.0514	0.3184	0.2406	0.9683	0.0385	0.6452	0.5383	0.7407	0.5837	0.714	0.0439	0.7238		0.9876	1.369	0.142	2.596	2.6556	1.8332	3.478	3.037		43	36	13	67	90	83
	5124			methyl glucopyranoside (alpha + beta)	LC/MS neg	46144		HMDB0029965	445238;3036743;2108					2.07444	3.55	1.36	0.79	2.07		0.9896	0.8367	0.2224	0.481	0.1446	0.9683	0.0755	0.666	0.8517	0.8387	0.2744	0.6062	0.319	0.8429		0.8893	1.3184	0.5791	2.0578	1.4158	1.1996	1.6319	1.8448		64	71	63	83	62	67
	5150			4-vinylguaiacol sulfate	LC/MS neg	48442		HMDB0127980	53803570					2.77039	2.5	2.92	2.06	1.76		0.1888	0.51	0.1676	0.455	0.6168	0.9683	0.5471	0.8975	0.1602	0.5888	0.1754	0.5418	0.578	0.9369		0.8262	1.0459	0.5981	1.4938	2.0692	1.0544	3.084	2.2889		79	71	75	67	90	83
	5151			pyrraline	LC/MS neg	48428	C21013	HMDB0033143	14274616					2.28611	3.87	1.56	0.88	2.18		0.1236	0.4429	0.014	0.237	0.4579	0.9683	0.0315	0.6452	0.1742	0.5888	0.5375	0.6854	0.1275	0.7608		0.5379	0.8252	0.3388	1.3116	0.9424	0.737	1.1479	1.2297		29	43	13	83	81	50
	5153			umbelliferone sulfate	LC/MS neg	48674		HMDB0240565	129659					10.5775	14.51	3.03	0.11	0.52		0.8501	0.8132	0.7532	0.6953	0.7291	0.9752	0.9829	0.9453	0.6206	0.7658	0.906	0.7962	0.7196	0.983		0.7112	7.2509	0.9347	13.5671	0.9829	0.4876	1.4782	7.5227		57	43	50	33	57	67
	5154			daidzein sulfate (2)	LC/MS neg	48728			12114465					0.49307	0.67	0.42	1.58	2.49		0.6934	0.772	0.5776	0.6318	0.5517	0.9683	0.9794	0.9453	0.3891	0.7014	0.8795	0.7933	0.5074	0.9077		0.7792	0.3726	0.4468	0.2983	0.7908	1.1116	0.4701	0.3842		29	43	25	67	33	33
	5156			eugenol sulfate	LC/MS neg	48715		HMDB0135245	180632					1.89106	2.36	1.39	0.56	0.94		0.7877	0.7977	0.4832	0.6083	0.839	0.9752	0.7372	0.9224	0.4979	0.7293	0.7232	0.7543	0.9645	1		1.0492	1.8147	1.0806	2.5488	1.2186	1.0178	1.4194	1.9841		79	79	88	67	86	67
	5163			2-keto-3-deoxy-gluconate	LC/MS polar	48141	C00204	HMDB0001353	161227					1.12264	1.12	1.12	0.98	0.98		0.7021	0.776	0.3805	0.5672	0.954	0.978	0.5296	0.8923	0.5374	0.7407	0.7413	0.7582	0.8273	0.9953		1.0665	1.1431	1.0774	1.2088	1.1207	1.0556	1.1858	1.1973		100	100	100	100	100	100
	5165			isoeugenol sulfate	LC/MS neg	48997			122198202					0.723337	0.59	1.01	0.83	0.48		0.5044	0.7176	0.9428	0.7446	0.9015	0.9776	0.8956	0.9404	0.9688	0.8569	0.6825	0.7431	0.5952	0.9439		1.3211	1.4163	1.7854	1.0472	0.8604	0.8568	0.864	0.9556		57	50	50	50	62	67
	5174			syringol sulfate	LC/MS neg	48454								0.334806	1	0.25	1.91	7.69		0.0806	0.366	0.4503	0.5965	0.4503	0.9683	1	0.9453	0.2602	0.6524	0.4407	0.649	0.0946	0.7608		2.9644	0.682	0.682	0.682	3.2749	5.2469	1.3029	0.9925		14	7	0	17	33	33
	5185			trans-3,4-methyleneheptanoate	LC/MS neg	53026								0.801352	0.65	0.97	1.28	0.86		0.6333	0.7553	0.1351	0.428	0.2364	0.9683	0.0755	0.666	0.8081	0.8306	0.2146	0.5658	0.6298	0.955		1.1241	0.9997	1.2094	0.79	1.0252	1.0389	1.0116	0.9008		100	86	100	67	95	100
	5227			resveratrol disulfate (1)*	LC/MS neg	62110								0.203748	0.13	0.31	1.77	0.71		0.5758	0.743	0.1883	0.4618	0.9247	0.978	0.3414	0.8372	0.3558	0.6963	0.6237	0.7295	0.7545	0.9875		2.4599	1.6197	2.8778	0.3616	1.3414	2.042	0.6407	0.5012		21	7	13	0	29	33
	5228			resveratrol disulfate (2)*	LC/MS neg	62111								0.184089	0.1	0.28	2.59	0.89		0.6902	0.772	0.2361	0.4866	0.9004	0.9776	0.3776	0.8566	0.4232	0.7092	0.6945	0.7445	0.8542	0.9953		0.2602	0.151	0.2753	0.0267	0.1572	0.2452	0.0691	0.0479		14	7	13	0	14	17
	5236			(2,4 or 2,5)-dimethylphenol sulfate	LC/MS neg	62533								0.739177	0.55	0.92	1.81	1.07		0.1788	0.5019	0.3127	0.5304	0.2428	0.9683	0.147	0.7398	0.9026	0.8471	0.0635	0.4717	0.9021	1		1.3166	0.9811	1.2698	0.6924	1.3087	1.3635	1.254	0.9732		100	100	100	100	100	100
	5237			caffeic acid sulfate	LC/MS polar	53254		HMDB0041708	21668705					1.73371	3.53	0.98	0.65	2.37		0.7094	0.7761	0.1998	0.4716	0.8057	0.9752	0.304	0.8104	0.4318	0.7092	0.9241	0.8031	0.6783	0.9679		1.2295	1.6529	0.7292	2.5766	1.7082	1.7298	1.6866	2.1316		86	86	88	83	90	83
	5240			tartronate (hydroxymalonate)	LC/MS neg	20693	C02287	HMDB0035227	45					0.983059	1.05	0.89	0.6	0.72		0.0354	0.3019	0.9184	0.7421	0.9164	0.978	0.8894	0.9404	0.9985	0.8588	0.0936	0.507	0.1699	0.7608		1.0153	1.2135	1.1829	1.244	0.7999	0.8477	0.7522	0.9981		100	100	100	100	100	100
	5248			3-indoleglyoxylic acid	LC/MS neg	63583			73863					1.04139	0.98	1.1	1.12	1		0.495	0.7176	0.521	0.6198	0.8805	0.9757	0.7408	0.9224	0.5524	0.7437	0.5323	0.6854	0.7202	0.983		1.0341	1.0256	1.0361	1.0151	1.0854	1.0321	1.1387	1.0769		100	100	100	100	100	100
	5251			vanillate glucuronide	LC/MS polar	63842		HMDB0240572						2.81208	5.96	0.6	0.14	1.43		0.6379	0.7553	0.6632	0.6683	0.2281	0.9683	0.2714	0.7934	0.5579	0.7463	0.2105	0.5598	0.6165	0.955		1.7098	4.9092	1.4097	8.4086	1.6088	2.01	1.2076	4.8081		43	36	38	33	48	50
	5252			vanilloylglycine	LC/MS neg	63853		HMDB0060026	3083688					6.54686	15.25	1.49	0.17	1.72		0.9561	0.8346	0.3519	0.5566	0.4521	0.9683	0.261	0.7909	0.8914	0.8459	0.5444	0.6898	0.6391	0.955		1.8822	11.2416	1.3835	21.0997	2.9631	2.3808	3.5454	12.3225		71	64	63	67	86	83
	5253			4-vinylguaiacol glucuronide	LC/MS neg	63843								2.82544	2.93	2.74	1.12	1.19		0.5985	0.743	0.1286	0.4239	0.9324	0.978	0.3299	0.8296	0.2261	0.6313	0.6464	0.7355	0.7666	0.9875		0.228	0.4084	0.2081	0.6088	0.4638	0.248	0.6796	0.6442		7	7	0	17	33	17
	5256			4-ethyl-2-methoxyphenol sulfate	LC/MS neg	64042								2.5829	1.47	3.38	3.21	1.4		0.2406	0.5593	0.1945	0.4697	0.8256	0.9752	0.4645	0.8715	0.2544	0.6505	0.2956	0.6091	0.5183	0.917		0.5742	0.5914	0.4785	0.7042	1.4659	0.6698	2.2619	1.4831		21	21	13	33	52	33
	5258			ethyl beta-glucopyranoside	LC/MS neg	64131		HMDB0029968	121667					2.08121	11.43	1.04	0.82	8.98		0.9723	0.8346	0.041	0.2987	0.0688	0.9683	0.0113	0.6452	0.8543	0.8389	0.1599	0.5365	0.2239	0.7933		1.7153	2.1375	0.3439	3.9311	3.1477	3.0867	3.2088	3.5699		43	64	38	100	71	50
	5283			2-acetamidophenol sulfate	LC/MS neg	48580			181671					4.42382	31.18	1.65	0.51	9.65		0.5156	0.722	0.0096	0.2071	0.0116	0.8182	0.001	0.5575	0.9554	0.8516	0.1387	0.5125	0.0323	0.7032		1.0514	3.1777	0.1975	6.1578	2.525	1.9053	3.1447	4.6512		71	64	50	83	95	100
	5284			2-aminophenol sulfate	LC/MS neg	43266		HMDB0061116	181670					3.12712	18.61	1.67	0.96	10.65		0.1006	0.4043	0.0137	0.237	0.0493	0.9456	0.0038	0.5575	0.6732	0.7866	0.7925	0.7767	0.0176	0.6553		1.0077	1.6961	0.173	3.2192	2.4629	1.8425	3.0833	3.1512		100	100	100	100	100	100
	5363		Bacterial/Fungal	N-methylpipecolate	LC/MS pos early	47101			11286529					0.936284	0.96	0.91	0.86	0.9		0.8803	0.8233	0.9567	0.7451	0.6218	0.9683	0.7132	0.9215	0.7416	0.8094	0.6292	0.7324	0.8178	0.9933		1.3105	1.3485	1.3769	1.3201	1.1891	1.2441	1.134	1.227		100	100	100	100	100	100
	5415		Drug - Analgesics, Anesthetics	4-acetamidophenol	LC/MS neg	12032	C06804	HMDB0001859	1983					2.20956	3.17	1.08	0.29	0.85		0.0947	0.3937	0.8951	0.7361	0.583	0.9683	0.6477	0.9164	0.7538	0.8156	0.0974	0.507	0.4388	0.8882		0.6547	1.4766	0.7088	2.2444	0.6247	0.6007	0.6487	1.4466		43	57	63	50	24	17
	5417			3-(N-acetyl-cystein-S-yl) acetaminophen	LC/MS neg	45721			83967					0.535986	0.12	0.82	10.5	1.49		0.8025	0.8015	0.0901	0.3753	0.2487	0.9683	0.0588	0.6604	0.67	0.7842	0.4938	0.6731	0.3455	0.8621		0.6308	0.283	0.5071	0.0588	0.6859	0.7544	0.6173	0.3381		50	43	75	0	14	17
	5418			4-acetaminophen sulfate	LC/MS neg	37475	C06804	HMDB0059911	83939					0.815799	0.01	1.37	366.51	1.46		0.8357	0.8098	0.1238	0.4204	0.0621	0.9683	0.0248	0.6452	0.7925	0.8241	0.2049	0.5573	0.1602	0.7608		3.7166	1.5204	3.0242	0.0165	5.2282	4.409	6.0474	3.032		50	50	75	17	33	17
	5419			4-acetamidophenylglucuronide	LC/MS neg	15736		HMDB0010316	83944;4022661					0.451848	0.03	0.84	30.21	1.08		0.7861	0.7974	0.1044	0.3929	0.1798	0.9683	0.0496	0.6507	0.823	0.8332	0.4162	0.638	0.278	0.8294		1.1121	0.5499	1.0676	0.0322	1.0648	1.1566	0.9729	0.5025		36	29	50	0	29	17
	5420			2-hydroxyacetaminophen sulfate*	LC/MS neg	33173		HMDB0062547	86290013					0.38556	0.04	0.65	23.84	1.3		0.8327	0.8098	0.1088	0.4015	0.1617	0.9683	0.0469	0.6452	0.8714	0.8434	0.367	0.6317	0.2779	0.8294		1.108	0.4979	0.9614	0.0344	1.0373	1.2546	0.82	0.4272		36	29	50	0	29	17
	5421			2-methoxyacetaminophen sulfate*	LC/MS neg	47031		HMDB0062550	86290014					0.598249	0.34	0.84	2.7	1.09		0.9789	0.8346	0.1639	0.455	0.4622	0.9683	0.1554	0.7471	0.6129	0.7645	0.5672	0.7023	0.6335	0.955		0.6168	0.3956	0.5915	0.1997	0.5902	0.6422	0.5383	0.369		36	29	50	0	14	17
	5422			2-methoxyacetaminophen glucuronide*	LC/MS neg	33161		HMDB0240215	121596203					0.577544	0.5	0.68	1.05	0.77		0.5975	0.743	0.0414	0.2987	0.4117	0.9683	0.056	0.6604	0.3387	0.6956	0.8242	0.7817	0.3667	0.8621		1.0839	0.9189	1.2282	0.6096	0.791	0.9397	0.6424	0.626		36	29	50	0	14	17
	5423			3-(cystein-S-yl)acetaminophen*	LC/MS pos early	34365		HMDB0240217	171264					0.978175	0.94	1.01	1.21	1.12		0.4157	0.6713	0.6795	0.6706	0.9295	0.978	0.7364	0.9224	0.8074	0.8306	0.498	0.6731	0.6251	0.955		0.6094	0.5563	0.5741	0.5385	0.6493	0.6448	0.6538	0.5961		21	14	25	0	10	17
	5427			3-(methylthio)acetaminophen sulfate*	LC/MS neg	62567								0.44698	0.1	1.97	4.71	0.23		0.3415	0.6415	0.1233	0.4204	0.0855	0.9683	0.0314	0.6452	0.8864	0.8441	0.5479	0.6901	0.0754	0.7604		1.7965	1.6006	2.9202	0.2811	0.9989	0.6729	1.325	0.803		57	57	88	17	29	17
	5431			naproxen	LC/MS neg	12122	C01517	HMDB0001923	156391					1	1	1	1	1																	1	1	1	1	1	1	1	1		0	0	0	0	5	0
	5433			desmethylnaproxen	LC/MS neg	46331		HMDB0013989	162920					1	1	1	1	1																	1	1	1	1	1	1	1	1		0	0	0	0	5	0
	5434			desmethylnaproxen sulfate	LC/MS neg	46106			184679					1	1	1	1	1																	1	1	1	1	1	1	1	1		0	0	0	0	5	0
	5435			ibuprofen	LC/MS neg	17799	C01588	HMDB0001925	3672					4.22492	4.32	2.65	0.04	0.06		0.2443	0.5616	0.4788	0.6063	0.7456	0.9752	0.4889	0.8715	0.7721	0.8226	0.2648	0.5953	0.5684	0.9343		1.8842	9.4385	3.5459	15.3311	0.4063	0.2224	0.5902	7.9606		36	36	38	33	33	33
	5436			2-hydroxyibuprofen	LC/MS neg	43330		HMDB0060920	10443535					2.61968	3.17	1.63	0.29	0.56		0.1149	0.4254	0.1514	0.4434	0.5407	0.9683	0.171	0.7773	0.5274	0.7385	0.1029	0.507	0.5059	0.9077		0.4086	1.0945	0.5244	1.6647	0.3844	0.2927	0.4761	1.0704		21	29	25	33	24	17
	5438			carboxyibuprofen	LC/MS neg	43333		HMDB0060564	10444113					4.82202	4.66	7.29	0.1	0.07		0.2942	0.6092	0.3283	0.5391	0.7846	0.9752	0.4011	0.8592	0.5943	0.7607	0.3217	0.6162	0.5994	0.9458		1.0136	5.3813	1.9018	8.8608	0.5199	0.1254	0.9144	4.8876		36	43	50	33	24	17
	5440			ibuprofen acyl glucuronide	LC/MS neg	38366		HMDB0010343	163959					4.984	5.52	1.23	0.03	0.14		0.1917	0.5138	0.3526	0.5566	0.5218	0.9683	0.2939	0.7961	0.8258	0.8347	0.1471	0.523	0.6482	0.955		1.0564	6.0253	1.8473	10.2034	0.2962	0.2655	0.3269	5.2651		21	36	25	50	24	17
	5445			salicyluric glucuronide*	LC/MS neg	33384		HMDB0240252	121596205					45.0033	69.95	4.75	0.04	0.62		0.074	0.3593	0.0032	0.1476	0.1399	0.9683	0.0035	0.5575	0.2157	0.6188	0.017	0.3526	0.824	0.995		0.2152	9.4261	0.2657	18.5866	0.4738	0.1648	0.7828	9.6847		36	50	38	67	43	33
	5451			celecoxib	LC/MS neg	38599	D00567 C07589	HMDB0005014	2662					0.714628	0.56	1	1	0.56		0.3124	0.6205	0.3124	0.5304	0.3124	0.9683	0.1782	0.7795	1	0.8588	1	0.8124	0.1782	0.7608		0.3336	0.3336	0.4288	0.2384	0.2384	0.2384	0.2384	0.2384		7	7	13	0	5	0
	5458			meloxicam	LC/MS neg	64093	C08169 D00969	HMDB0014952	54677470					1.00895	1	1.02	1.02	1		0.5997	0.743	0.5997	0.6422	0.5997	0.9683	1	0.9453	0.4324	0.7092	0.4324	0.647	1	1		0.8823	0.8823	0.8823	0.8823	0.8902	0.8823	0.898	0.8902		7	7	13	0	5	0
	5476			tramadol	LC/MS pos early	53241	C07153	HMDB0014339	33741					1	1	1	1	1																	1	1	1	1	1	1	1	1		0	0	0	0	5	0
	5477			O-desmethyltramadol	LC/MS pos early	53239		HMDB0060997	9838803					1	1	1	1	1																	1	1	1	1	1	1	1	1		0	0	0	0	5	0
	5478			O-desmethyltramadol glucuronide	LC/MS neg	52357		HMDB0060856	29919005					1	1	1	1	1																	1	1	1	1	1	1	1	1		0	0	0	0	5	0
	5533		Drug - Antibiotic	sulfamethoxazole	LC/MS neg	53240	D00447	HMDB0015150	5329					1	1	1	1	1																	1	1	1	1	1	1	1	1		0	7	0	17	0	0
	5534			N4-acetylsulfamethoxazole*	LC/MS neg	62106	C13061 D01601	HMDB0013854	65280					1	1	1	1	1																	1	1	1	1	1	1	1	1		0	7	0	17	0	0
	5535			N4-acetyl-5-hydroxysulfamethoxazole*	LC/MS neg	62107								1	1	1	1	1																	1	1	1	1	1	1	1	1		0	7	0	17	0	0
	5542			triclosan sulfate	LC/MS neg	62732		HMDB0061387	67606152					6.45503	0.71	14.58	14.58	0.71		0.7209	0.7761	0.7209	0.6874	0.3833	0.9683	0.7276	0.9215	0.3576	0.6963	0.3576	0.6317	0.7276	0.9864		0.3169	0.3169	0.3711	0.2626	2.0456	0.2626	3.8286	2.0456		7	7	13	0	14	0
	5562			quinine	LC/MS pos early	39767	C06526	HMDB0014611	3034034					0.730717	0.77	0.69	0.89	1		0.5117	0.719	0.3625	0.5615	0.9031	0.9776	0.4877	0.8715	0.5521	0.7437	0.6877	0.7431	0.6015	0.9458		0.4382	0.3889	0.4391	0.3387	0.3695	0.4373	0.3016	0.3202		29	36	38	33	10	17
	5570			trimethoprim	LC/MS pos early	64075	C01965 D00145	HMDB0014583	5578					1	1	1	1	1																	1	1	1	1	1	1	1	1		0	7	0	17	0	0
	5603		Drug - Antiviral	ritonavir	LC/MS pos late	63278	D00427	HMDB0014646	392622					1	1	1	1	1																	1	1	1	1	1	1	1	1		0	0	0	0	5	0
	5604			darunavir	LC/MS pos late	63290	D03656	HMDB0015393	213039					1	1	1	1	1																	1	1	1	1	1	1	1	1		0	0	0	0	5	0
	5607			dolutegravir	LC/MS pos late	63276	D10066		54726191					0.65597	1	0.49	1	2.05		0.1706	0.4944	0.1706	0.455	0.1706	0.9683	1	0.9453	0.0435	0.4259	1	0.8124	0.0692	0.7604		0.3677	0.2412	0.2412	0.2412	0.3677	0.4941	0.2412	0.2412		7	0	0	0	10	17
	5616			abacavir	LC/MS pos early	63293	DG00660 C07624 D07057	HMDB0015182	441300					1	1	1	1	1																	1	1	1	1	1	1	1	1		7	0	0	0	5	17
	5619			lamivudine	LC/MS pos early	63284	C07065	HMDB0014847	60825					1	1	1	1	1																	1	1	1	1	1	1	1	1		7	0	0	0	5	17
	5682		Drug - Cardiovascular	metoprolol	LC/MS pos early	18037	D02358	HMDB0001932	4171					1.20207	1	1.4	1.4	1		0.5663	0.743	0.5663	0.6291	0.5663	0.9683	1	0.9453	0.3912	0.7023	0.3912	0.6317	1	1		0.8398	0.8398	0.8398	0.8398	1.0095	0.8398	1.1793	1.0095		0	0	0	0	14	0
	5683			metoprolol acid metabolite*	LC/MS pos early	34109			62936					1.16392	1	1.33	1.33	1		0.5599	0.743	0.5599	0.6291	0.5599	0.9683	1	0.9453	0.3835	0.6972	0.3835	0.6317	1	1		0.8266	0.8266	0.8266	0.8266	0.9621	0.8266	1.0977	0.9621		0	0	0	0	14	0
	5684			alpha-hydroxymetoprolol	LC/MS pos early	54738		HMDB0060994	114962					1.22143	1	1.44	1.44	1		0.5375	0.7265	0.5375	0.6238	0.5375	0.9683	1	0.9453	0.3568	0.6963	0.3568	0.6317	1	1		0.7009	0.7009	0.7009	0.7009	0.8561	0.7009	1.0113	0.8561		0	0	0	0	14	0
	5696			4-hydroxycoumarin	LC/MS neg	37445	C20414		54682930					2.13306	4.77	1.01	0.5	2.36		0.5662	0.743	0.1679	0.455	0.1996	0.9683	0.0774	0.666	0.9399	0.8511	0.5876	0.7147	0.2142	0.79		0.5441	0.9359	0.3242	1.5475	0.7688	0.764	0.7736	1.1606		29	36	13	67	48	50
	5706			rivaroxaban	LC/MS neg	52958			9875401					1	1	1	1	1																	1	1	1	1	1	1	1	1		7	0	0	0	5	17
	5715			furosemide	LC/MS neg	43009	D00331	HMDB0001933	3440					1	1	1	1	1																	1	1	1	1	1	1	1	1		7	7	13	0	0	0
	5725			hydrochlorothiazide	LC/MS neg	39625	C07041	HMDB0001928	3639					1	1	1	1	1																	1	1	1	1	1	1	1	1		0	0	0	0	5	0
	5736			losartan	LC/MS neg	64102	D08146 C07072	HMDB0014816	3961					1.21013	1	1.42	1.42	1		0.5997	0.743	0.5997	0.6422	0.5997	0.9683	1	0.9453	0.4324	0.7092	0.4324	0.647	1	1		0.2408	0.2408	0.2408	0.2408	0.2914	0.2408	0.342	0.2914		0	0	0	0	10	0
	5738			valsartan	LC/MS neg	48566		HMDB0014323	60846					1	1	1	1	1																	1	1	1	1	1	1	1	1		0	0	0	0	5	0
	5744			lisinopril	LC/MS neg	54787	DG00336 D00362	HMDB0001938	5362119					2.53786	4.29	1.3	0.43	1.42		0.8152	0.8071	0.3646	0.5615	0.2978	0.9683	0.194	0.785	0.9177	0.8491	0.339	0.6247	0.5848	0.9375		0.14	0.3061	0.1157	0.4965	0.1892	0.1644	0.2141	0.3553		7	7	0	17	14	17
	5786		Drug - Gastrointestinal	omeprazole	LC/MS neg	38600	C07324	HMDB0001913	4594					0.877133	0.51	1.61	1.61	0.51		0.7655	0.791	0.7655	0.6969	0.1488	0.9683	0.2411	0.7881	0.383	0.6972	0.383	0.6317	0.2411	0.8163		0.293	0.293	0.3891	0.1969	0.257	0.1969	0.3171	0.257		14	21	25	17	10	0
	5788			pantoprazole	LC/MS neg	38609	C11806	HMDB0005017	4679					0.965945	1	0.93	1	1.07		0.1706	0.4944	0.1706	0.455	0.1706	0.9683	1	0.9453	0.0435	0.4259	1	0.8124	0.0692	0.7604		0.8545	0.8254	0.8254	0.8254	0.8545	0.8836	0.8254	0.8254		14	7	13	0	5	17
	5795		Drug - Metabolic	metformin	LC/MS pos early	38306	C07151	HMDB0001921	4091					1.02677	1	1.05	1.05	1		0.5997	0.743	0.5997	0.6422	0.5997	0.9683	1	0.9453	0.4324	0.7092	0.4324	0.647	1	1		0.7135	0.7135	0.7135	0.7135	0.7326	0.7135	0.7517	0.7326		0	0	0	0	10	0
	5798			glimepiride	LC/MS neg	64110	C07669	HMDB0014367	3476					1	1	1	1	1																	1	1	1	1	1	1	1	1		0	0	0	0	5	0
	5866		Drug - Neurological	2-hydroxycarbamazepine	LC/MS pos early	57789	C16601	HMDB0060651	129274					1	1	1	1	1																	1	1	1	1	1	1	1	1		7	7	13	0	0	0
	5868			10,11-dihydro-10-hydroxycarbamazepine	LC/MS neg	62882	C07493	HMDB0060676	114709					1	1	1	1	1																	1	1	1	1	1	1	1	1		7	7	13	0	0	0
	5870			gabapentin	LC/MS pos early	38686	D00332	HMDB0005015	3446					0.902644	0.7	1.2	1.18	0.68		0.6572	0.7632	0.7483	0.6953	0.3025	0.9683	0.3644	0.846	0.5906	0.7598	0.6556	0.7405	0.3232	0.8486		0.4766	0.4798	0.5657	0.394	0.427	0.3874	0.4665	0.4302		7	14	13	17	10	0
	5876			baclofen	LC/MS pos early	57646	D00241	HMDB0014327	2284					0.470527	0.35	0.59	1.58	0.94		0.9681	0.8346	0.1205	0.4204	0.5328	0.9683	0.1452	0.7398	0.4743	0.7251	0.6609	0.7405	0.6557	0.9581		0.3834	0.2676	0.3951	0.14	0.2962	0.3716	0.2208	0.1804		29	21	38	0	14	17
	5883			riluzole	LC/MS neg	12380	C07937	HMDB0014878	5070					1.35705	1.49	1.24	0.95	1.15		0.585	0.743	0.6657	0.6683	0.6665	0.9683	0.5632	0.9082	0.9993	0.8588	0.9307	0.8031	0.5128	0.9142		0.4876	0.5659	0.4545	0.6772	0.5834	0.5208	0.6461	0.6617		57	50	50	50	62	67
	5902		Drug - Psychoactive	hydroxybupropion	LC/MS pos early	32882		HMDB0012235	446					1	1	1	1	1																	1	1	1	1	1	1	1	1		7	0	0	0	5	17
	5903			sertraline	LC/MS pos late	39757	C07246	HMDB0005010	68617					1	1	1	1	1																	1	1	1	1	1	1	1	1		0	0	0	0	5	0
	5904			venlafaxine	LC/MS pos late	38623	C07187	HMDB0005016	5656					0.916297	0.85	1	1	0.85		0.3124	0.6205	0.3124	0.5304	0.3124	0.9683	0.1782	0.7795	1	0.8588	1	0.8124	0.1782	0.7608		0.6308	0.6308	0.6835	0.578	0.578	0.578	0.578	0.578		7	7	13	0	5	0
	5905			O-desmethylvenlafaxine	LC/MS pos early	43334	D07793	HMDB0015646	125017					0.996201	0.99	1	1	0.99		0.3124	0.6205	0.3124	0.5304	0.3124	0.9683	0.1782	0.7795	1	0.8588	1	0.8124	0.1782	0.7608		0.9739	0.9739	0.9777	0.9702	0.9702	0.9702	0.9702	0.9702		7	7	13	0	5	0
	5907			N,O-didesmethylvenlafaxine glucuronide	LC/MS pos early	52358		HMDB0061167	71316036					1.02316	1	1.05	1.05	1		0.5997	0.743	0.5997	0.6422	0.5997	0.9683	1	0.9453	0.4324	0.7092	0.4324	0.647	1	1		0.7425	0.7425	0.7425	0.7425	0.7597	0.7425	0.7768	0.7597		7	7	13	0	5	0
	5921			4-hydroxy duloxetine glucuronide*	LC/MS neg	62480		HMDB0060763	29981512					1	1	1	1	1																	1	1	1	1	1	1	1	1		0	0	0	0	5	0
	5922			5-hydroxy-6-methoxy duloxetine sulfate*	LC/MS neg	62481								1	1	1	1	1																	1	1	1	1	1	1	1	1		0	0	0	0	5	0
	5929			trazodone	LC/MS pos early	57691	C07156 D08626	HMDB0014794	5533					0.197136	0.12	0.47	1	0.26		0.4204	0.6746	0.0549	0.3246	0.4204	0.9683	0.0687	0.666	0.3838	0.6972	1	0.8124	0.2817	0.8294		0.6635	0.5911	1.0515	0.1308	0.2032	0.2756	0.1308	0.1308		29	29	38	17	5	17
	5936			zolpidem	LC/MS pos early	62976	C07219	HMDB0005023	5732					1.26885	1	1.54	1.54	1		0.4867	0.713	0.4867	0.6101	0.4867	0.9683	1	0.9453	0.2992	0.6708	0.2992	0.6091	1	1		0.4482	0.4482	0.4482	0.4482	0.5687	0.4482	0.6891	0.5687		0	0	0	0	14	0
	5941			THC carboxylic acid	LC/MS neg	61836			107885					1.2399	0.6	2.32	2.32	0.6		0.9459	0.8342	0.9459	0.7446	0.3345	0.9683	0.487	0.8715	0.4991	0.7293	0.4991	0.6731	0.487	0.8993		0.208	0.208	0.2608	0.1552	0.2579	0.1552	0.3605	0.2579		7	7	13	0	10	0
	5942			THC carboxylic acid glucuronide	LC/MS neg	61848								1.28554	0.49	2.9	2.9	0.49		0.917	0.8298	0.917	0.7421	0.3254	0.9683	0.4644	0.8715	0.5074	0.7327	0.5074	0.6752	0.4644	0.8977		0.1632	0.1632	0.219	0.1075	0.2098	0.1075	0.3121	0.2098		7	7	13	0	10	0
	5975		Drug - Respiratory	cetirizine	LC/MS pos late	54745	C07778	HMDB0005032	2678					1.32622	1.5	1.14	0.69	0.91		0.5344	0.7265	0.6561	0.6683	0.6529	0.9683	0.5488	0.8988	0.9974	0.8588	0.4231	0.6428	0.9077	1		0.3654	0.4789	0.3832	0.5745	0.3711	0.3475	0.3947	0.4846		21	14	13	17	14	33
	5976			De(carboxymethoxy) cetirizine acetic acid	LC/MS pos late	64199								0.281456	0.56	0.19	1.06	3.09		0.3951	0.6631	0.0888	0.3753	0.4969	0.9683	0.4785	0.8715	0.0764	0.4721	0.8964	0.7951	0.3065	0.8407		1.9861	0.7574	0.971	0.5438	1.7876	3.0011	0.5742	0.559		21	14	13	17	14	33
	5988			dextromethorphan	LC/MS pos late	38301	D03744 DG01078 C06947	HMDB0001920	5360696					1	1	1	1	1																	1	1	1	1	1	1	1	1		0	7	0	17	0	0
	6000		Drug - Topical Agents	salicylate	LC/MS polar	1515	C00805	HMDB0001895	338					18.7374	21.99	3.22	0.03	0.21		0.0097	0.2337	0.0028	0.1476	0.1747	0.9683	0.004	0.5575	0.1729	0.5888	0.004	0.2313	0.3667	0.8621		1.7562	33.3789	2.904	63.8539	1.284	0.6084	1.9595	32.9067		100	100	100	100	100	100
	6002			2,6-dihydroxybenzoic acid	LC/MS neg	63042		HMDB0013676	9338					2.81671	5.57	1.73	0.78	2.52		0.6656	0.7649	0.0159	0.237	0.7111	0.9726	0.0589	0.6604	0.1128	0.5212	0.9629	0.8101	0.5906	0.9429		0.8462	1.5777	0.4806	2.6748	1.6521	1.2119	2.0922	2.3835		93	93	100	83	95	83
	6006			hydroquinone sulfate	LC/MS neg	35322	C00530	HMDB0240263	161220					1.06069	1.07	1.06	0.99	1		0.924	0.8311	0.5207	0.6198	0.7087	0.9717	0.4961	0.8737	0.8394	0.8351	0.8345	0.7861	0.753	0.9875		0.6888	0.7129	0.6901	0.7358	0.7065	0.6875	0.7255	0.7306		50	57	50	67	57	50
	6029		Drug - Other	S-carboxymethyl-cysteine	LC/MS pos early	47897	C03727	HMDB0029415	193653					0.761436	0.69	0.85	1.02	0.83		0.6025	0.743	0.1931	0.4694	0.636	0.9683	0.2343	0.7875	0.5274	0.7385	0.9714	0.811	0.5055	0.9077		0.9553	0.8838	1.0461	0.7215	0.7989	0.8644	0.7334	0.7274		57	50	63	33	38	50
	6104		Chemical	neopentyl glycol glutarate**	LC/MS neg	64429								0.644624	0.7	0.61	1.33	1.55		0.0498	0.3322	0.0407	0.2987	0.7442	0.9752	0.2348	0.7875	0.0741	0.4655	0.2086	0.559	0.1219	0.7608		1.4835	0.9921	1.1638	0.8203	1.4477	1.8031	1.0922	0.9563		100	100	100	100	100	100
	6105			neopentyl glycol adipate**	LC/MS neg	64428								0.667249	0.7	0.64	1.34	1.47		0.0475	0.3303	0.0438	0.3072	0.8751	0.9757	0.2019	0.785	0.1	0.5135	0.1631	0.5365	0.1462	0.7608		1.3746	0.9476	1.1117	0.7835	1.3443	1.6376	1.0509	0.9172		100	100	100	100	100	100
	6106			neopentyl glycol suberate**	LC/MS neg	64421								0.592733	0.56	0.62	1.42	1.28		0.0534	0.333	0.0151	0.237	0.952	0.978	0.0872	0.6904	0.0691	0.4655	0.1309	0.507	0.2011	0.7733		1.5302	1.0462	1.3442	0.7482	1.391	1.7162	1.0658	0.907		100	100	100	100	100	100
	6107			neopentyl glycol azelate**	LC/MS neg	64419								0.670784	0.64	0.69	1.44	1.33		0.0429	0.3242	0.0374	0.2939	0.9206	0.978	0.137	0.7398	0.1299	0.5588	0.1072	0.507	0.1871	0.7665		1.3034	0.9174	1.1196	0.7153	1.2603	1.4873	1.0333	0.8743		100	100	100	100	100	100
	6108			neopentyl glycol sebacate**	LC/MS neg	64420								0.633907	0.59	0.67	1.41	1.25		0.0533	0.333	0.026	0.2569	0.961	0.978	0.1193	0.7227	0.0959	0.5048	0.1327	0.507	0.1982	0.7702		1.4805	1.0467	1.3152	0.7781	1.3723	1.6457	1.0989	0.9385		100	100	100	100	100	100
	6109			neopentyl glycol undecanedioate**	LC/MS neg	64424								0.696809	0.69	0.7	1.37	1.34		0.0458	0.3275	0.0573	0.3288	0.9262	0.978	0.2165	0.785	0.1311	0.5602	0.1462	0.523	0.1548	0.7608		1.379	0.9945	1.1783	0.8107	1.3454	1.5796	1.1112	0.9609		100	100	100	100	100	100
	6110			neopentyl glycol dodecanedioate**	LC/MS neg	64425								0.693093	0.69	0.7	1.31	1.3		0.0666	0.3451	0.066	0.3429	0.8995	0.9776	0.242	0.7881	0.1375	0.5648	0.1931	0.5495	0.1834	0.7608		1.3711	1.0075	1.1918	0.8231	1.314	1.5505	1.0776	0.9503		100	100	100	100	100	100
	6111			propylene glutarate (1)**	LC/MS neg	64430								0.57479	0.57	0.58	1.49	1.46		0.0218	0.2868	0.0148	0.237	0.7283	0.9752	0.1445	0.7398	0.0354	0.4107	0.1314	0.507	0.073	0.7604		1.4534	0.9266	1.182	0.6711	1.3623	1.7249	0.9996	0.8354		100	100	100	100	100	100
	6112			propylene glutarate (2)**	LC/MS neg	64431								0.549662	0.53	0.56	1.59	1.49		0.0274	0.289	0.0253	0.2567	0.8348	0.9752	0.1612	0.7611	0.0641	0.4651	0.1247	0.507	0.1003	0.7608		1.8666	1.1476	1.5019	0.7933	1.7451	2.2314	1.2587	1.026		100	100	100	100	100	100
	6113			propylene suberate (1)**	LC/MS neg	64432								0.563873	0.5	0.61	1.52	1.25		0.0663	0.3451	0.0066	0.1685	0.7732	0.9752	0.0397	0.6452	0.0585	0.4636	0.11	0.507	0.2877	0.8358		1.5617	1.0442	1.3908	0.6976	1.3982	1.7327	1.0637	0.8806		100	100	100	100	100	100
	6114			propylene suberate (2)**	LC/MS neg	64433								0.576734	0.52	0.62	1.5	1.26		0.0556	0.333	0.008	0.1829	0.732	0.9752	0.041	0.6452	0.0715	0.4655	0.0898	0.507	0.2787	0.8294		1.4244	0.9581	1.2592	0.657	1.2877	1.5895	0.986	0.8215		100	100	100	100	100	100
	6115			propylene azelate (1)**	LC/MS neg	64434								0.604227	0.57	0.63	1.49	1.36		0.036	0.3019	0.012	0.237	0.9421	0.978	0.0753	0.666	0.0606	0.4636	0.0993	0.507	0.1651	0.7608		1.443	0.9611	1.2207	0.7016	1.3538	1.6653	1.0422	0.8719		100	100	100	100	100	100
	6116			propylene azelate (2)**	LC/MS neg	64435								0.58209	0.56	0.6	1.5	1.39		0.0353	0.3019	0.0108	0.2275	0.9624	0.978	0.0835	0.6889	0.0468	0.4259	0.1164	0.507	0.1415	0.7608		1.5276	0.9944	1.2766	0.7122	1.4224	1.7786	1.0662	0.8892		100	100	100	100	100	100
	6117			propylene sebacate**	LC/MS neg	64437								0.482293	0.36	0.58	1.99	1.24		0.1153	0.4254	0.1253	0.4204	0.362	0.9683	0.1035	0.7173	0.6292	0.7698	0.0655	0.4717	0.6442	0.955		1.3554	0.8224	1.2082	0.4367	1.1867	1.5026	0.8708	0.6537		79	71	75	67	90	83
	6118			propylene tridecanedioate**	LC/MS neg	64438								0.662242	0.75	0.6	1.14	1.42		0.1628	0.4944	0.0594	0.335	0.3064	0.9683	0.543	0.8975	0.0319	0.3911	0.772	0.7703	0.1077	0.7608		1.4087	1.0169	1.1636	0.8703	1.3247	1.6539	0.9955	0.9329		100	93	100	83	95	100
	6119			diglycerol	LC/MS pos early	40700			42953					0.469184	0.24	1.3	1.52	0.28		0.8433	0.8098	0.9205	0.7421	0.6383	0.9683	0.7022	0.9195	0.781	0.8226	0.6168	0.7278	0.8547	0.9953		2.7891	2.7043	4.3682	1.0404	1.3935	1.2101	1.5769	1.3086		100	100	100	100	100	100
	6128			sulfate*	LC/MS neg	46960	C00059	HMDB01448	5152822					1.03506	1.01	1.06	1.08	1.02		0.4336	0.6863	0.4886	0.6105	0.6579	0.9683	0.8659	0.9352	0.3958	0.704	0.3594	0.6317	0.8178	0.9933		0.9812	0.974	0.971	0.9771	1.0228	0.9915	1.0541	1.0156		100	100	100	100	100	100
	6131			O-sulfo-tyrosine	LC/MS neg	45413		HMDB0155722	514186					0.96523	0.9	1.03	1.16	1		0.4986	0.7176	0.7264	0.6894	0.3908	0.9683	0.4181	0.86	0.7007	0.7923	0.2524	0.5881	0.9017	1		0.9836	0.9308	0.9822	0.8793	1.0022	0.985	1.0194	0.9494		93	93	100	83	95	83
	6135			ethyl glucuronide	LC/MS neg	39603		HMDB0010325	18392195					1.19362	1	1.38	1.45	1.05		0.3626	0.6551	0.5638	0.6291	0.5638	0.9683	1	0.9453	0.3882	0.7013	0.2669	0.5976	0.8207	0.9944		0.4674	0.4562	0.4562	0.4562	0.5691	0.4785	0.6596	0.5579		7	0	0	0	19	17
	6149			3-acetylphenol sulfate	LC/MS neg	48693								1.18883	2.12	0.68	0.59	1.84		0.3648	0.6551	0.591	0.6374	0.4767	0.9683	0.4032	0.8592	0.895	0.8465	0.8822	0.7933	0.2797	0.8294		1.1889	1.3072	0.8385	1.7759	1.2951	1.5393	1.0509	1.4134		71	64	63	67	90	83
	6194			dimethyl sulfone	LC/MS pos early	43424	C11142	HMDB0004983	6213					1.12082	1.38	0.92	0.88	1.32		0.7511	0.7836	0.6158	0.6508	0.1831	0.9683	0.2194	0.785	0.5261	0.7385	0.4405	0.649	0.2679	0.8277		0.7052	0.7235	0.6077	0.8394	0.772	0.8028	0.7413	0.7904		50	43	38	50	38	67
	6202			2-acrylamidoglycolic acid	LC/MS pos early	63259			92230					1.15043	1.52	0.92	0.98	1.62		0.1083	0.4107	0.2096	0.475	0.0568	0.9683	0.0364	0.6452	0.6047	0.7636	0.8089	0.7794	0.0208	0.6553		1.0264	0.9881	0.7837	1.1925	1.2191	1.269	1.1691	1.1808		100	100	100	100	100	100
	6217			2-naphthol sulfate	LC/MS neg	62520			74428					1.64135	0.79	2.57	2.98	0.92		0.3155	0.6209	0.8033	0.7033	0.5926	0.9683	0.8473	0.9333	0.5569	0.7458	0.2507	0.5865	0.7498	0.9875		1.122	1.0487	1.171	0.9264	1.9149	1.0731	2.7568	1.8416		100	100	100	100	95	100
	6219			2,4-di-tert-butylphenol	LC/MS neg	64328								0.969329	0.96	0.97	1.07	1.05		0.4331	0.6863	0.9309	0.7446	0.7458	0.9752	0.7828	0.9328	0.8586	0.8417	0.7284	0.7545	0.4576	0.8977		1.0466	1.0005	1.019	0.9821	1.0606	1.0741	1.047	1.0145		100	100	100	100	100	100
	6231			benzoylcarnitine*	LC/MS pos early	43265								2.42525	3.49	1.5	0.49	1.15		0.8056	0.8034	0.0376	0.2939	0.3481	0.9683	0.0443	0.6452	0.3673	0.6963	0.3747	0.6317	0.6398	0.955		0.8033	1.6799	0.7487	2.6111	1.0716	0.8579	1.2852	1.9482		86	86	75	100	90	100
	6232			perfluorooctanesulfonate (PFOS)	LC/MS polar	57564	C18142	HMDB0059586	74483					0.862012	1.2	0.72	1.48	2.46		0.0003	0.0805	0.5349	0.6232	0.3171	0.9683	0.7957	0.9331	0.2268	0.6313	0.0291	0.4109	0.0018	0.5551		1.1588	0.7369	0.6698	0.8041	1.4208	1.6479	1.1937	0.9989		100	100	100	100	100	100
	6255			4-hydroxychlorothalonil	LC/MS neg	48441		HMDB0240624	34217					1.56441	1.61	1.54	1.64	1.71		0.1021	0.4043	0.1647	0.455	0.371	0.9683	0.1281	0.7227	0.7017	0.7923	0.5643	0.7009	0.0919	0.7608		0.9952	0.957	0.7344	1.1795	1.5952	1.256	1.9344	1.5569		100	100	100	100	100	100
	6260			1,2,3-benzenetriol sulfate (2)	LC/MS neg	48762		HMDB0060018 HMDB0060016	54110629;92013662					0.884822	0.59	1.12	2.38	1.24		0.2905	0.606	0.5109	0.6182	0.6309	0.9683	0.9048	0.9427	0.3949	0.704	0.2507	0.5865	0.6948	0.9733		1.5246	1.0779	1.3586	0.7971	1.7958	1.6907	1.9009	1.349		79	86	88	83	90	67
	6262			2-methoxyresorcinol sulfate	LC/MS neg	48445								1.81185	2.28	1.45	0.82	1.28		0.4401	0.6892	0.5901	0.6374	0.6903	0.9717	0.9246	0.9453	0.4831	0.7273	0.3813	0.6317	0.8005	0.9909		1.8953	2.7195	1.6591	3.78	2.6098	2.1315	3.0881	3.434		64	64	63	67	81	67
	6263			3-hydroxypyridine sulfate	LC/MS neg	48448								1.08095	1.14	1.03	1.17	1.29		0.4153	0.6713	0.3328	0.5431	0.7511	0.9752	0.6592	0.9186	0.3357	0.6951	0.3968	0.6317	0.7368	0.9875		1.8418	1.724	1.61	1.8381	2.1087	2.0737	2.1437	1.9909		93	93	88	100	100	100
	6264			3-hydroxypyridine glucuronide	LC/MS pos early	63236								1.18427	1.08	1.3	1.08	0.89		0.5901	0.743	0.9742	0.7485	0.5689	0.9683	0.686	0.9194	0.6865	0.787	0.4073	0.6317	0.9833	1		0.8303	0.9124	0.8777	0.947	0.9012	0.7829	1.0195	0.9833		50	43	50	33	57	50
	6277			6-hydroxyindole sulfate	LC/MS neg	48698		HMDB0000682	122198196					1.2098	1.14	1.26	1.31	1.18		0.1048	0.4075	0.9831	0.7494	0.4041	0.9683	0.5841	0.9116	0.5202	0.7385	0.0685	0.4717	0.5839	0.9371		0.969	0.9525	0.8882	1.0167	1.1889	1.0499	1.3279	1.1723		100	100	100	100	100	100
	6281			thioproline	LC/MS pos early	53231		HMDB0062164	93176					1.10932	0.97	1.23	1.4	1.1		0.0884	0.3862	0.5773	0.6318	0.5173	0.9683	0.9513	0.9453	0.3679	0.6963	0.0799	0.4884	0.4645	0.8977		0.9312	0.8733	0.8854	0.8612	1.091	0.9771	1.2049	1.033		100	100	100	100	100	100
	6283			perfluorooctanoate (PFOA)	LC/MS neg	62071		HMDB0059587	9554					0.86231	2.02	0.54	0.94	3.53		0.0482	0.3303	0.2867	0.5113	0.0131	0.8182	0.0182	0.6452	0.2542	0.6505	0.6684	0.7408	0.0036	0.5766		1.3712	0.9132	0.6057	1.2207	1.6403	2.1366	1.144	1.1824		100	100	100	100	100	100
	6288			2,2'-methylenebis(6-tert-butyl-p-cresol)	LC/MS polar	62885			8398					0.918018	0.87	0.97	1.14	1.02		0.4414	0.69	0.2255	0.4825	0.5021	0.9683	0.2083	0.785	0.6787	0.787	0.2823	0.6091	0.9466	1		1.0856	1.0024	1.0723	0.9325	1.0798	1.0988	1.0607	0.9966		100	100	100	100	100	100
	6294			5-hydroxy-2-methylpyridine sulfate	LC/MS neg	63230								1.95113	1.69	2.1	2.21	1.78		0.1417	0.4712	0.2906	0.5148	0.9358	0.978	0.5098	0.8824	0.3924	0.7023	0.2424	0.5865	0.3459	0.8621		1.1827	1.144	0.8512	1.4367	2.3464	1.5142	3.1786	2.3076		71	71	63	83	90	83
	6296			3-hydroxy-2-methylpyridine sulfate	LC/MS neg	63227								1.8747	2.51	1.35	0.65	1.21		0.5965	0.743	0.2625	0.5029	0.7662	0.9752	0.5766	0.9083	0.2881	0.6592	0.5357	0.6854	0.8758	0.9953		1.0511	1.6706	0.9515	2.3898	1.3511	1.1508	1.5513	1.9705		79	79	75	83	90	83
	6301			3,5-dichloro-2,6-dihydroxybenzoic acid	LC/MS polar	63589			24721632					1.11958	1	1.22	1.47	1.21		0.063	0.3419	0.7097	0.6834	0.2708	0.9683	0.6205	0.9145	0.2702	0.6561	0.0292	0.4109	0.592	0.9439		0.909	0.8231	0.8237	0.8225	1.1037	0.9944	1.2129	1.0177		100	100	100	100	100	100
	6302			3-bromo-5-chloro-2,6-dihydroxybenzoic acid*	LC/MS neg	63681			134581543					1.0503	1.02	1.07	1.52	1.45		0.0113	0.2395	0.9436	0.7446	0.7078	0.9717	0.8382	0.9333	0.7382	0.8091	0.0281	0.4109	0.1306	0.7608		0.8648	0.7142	0.7073	0.721	1.0589	1.0222	1.0956	0.9083		100	100	100	100	100	100
	6308			4-chlorobenzoic acid	LC/MS neg	63988	C02370		6318					1.03264	1.1	0.97	0.93	1.07		0.996	0.838	0.4407	0.5945	0.0884	0.9683	0.0983	0.7173	0.4686	0.7202	0.1979	0.5495	0.2455	0.8207		0.9864	1.0035	0.9539	1.053	1.0015	1.0188	0.9841	1.0186		100	100	100	100	100	100
	6390			perfluorohexanesulfonate (PFHxS)	LC/MS neg	64623		HMDB0094700						1.198	1.74	1.02	1.77	3.01		0.0007	0.09	0.3149	0.532	0.0876	0.9683	0.0712	0.666	0.5817	0.7552	0.1483	0.5254	0.0009	0.5551		1.1101	0.7576	0.5534	0.9617	1.6824	1.6668	1.698	1.3299		100	100	100	100	100	100
	6413	Partially Characterized Molecules	Partially Characterized Molecules	glucuronide of C10H18O2 (1)*	LC/MS neg	61881								0.659027	1.01	0.53	1.41	2.68		0.0774	0.362	0.169	0.455	0.4566	0.9683	0.6637	0.9186	0.115	0.5212	0.4273	0.6451	0.0934	0.7608		2.4084	1.3124	1.3091	1.3158	2.6831	3.5076	1.8586	1.5872		93	79	88	67	95	100
	6419			glucuronide of C10H18O2 (7)*	LC/MS neg	61887								1.91109	3.36	1.38	1.11	2.7		0.6555	0.7632	0.6208	0.6525	0.6099	0.9683	0.501	0.8762	0.9907	0.8588	0.9615	0.8101	0.5218	0.917		1.7344	2.042	0.9367	3.1473	3.007	2.5321	3.4819	3.3146		43	43	38	50	57	50
	6431			glucuronide of C12H22O4 (1)*	LC/MS neg	61874								2.24024	4.17	0.92	0.32	1.46		0.6799	0.7672	0.0767	0.3522	0.186	0.9683	0.0407	0.6452	0.7219	0.8015	0.1943	0.5495	0.5347	0.922		0.9707	2.0412	0.7901	3.2922	1.1041	1.1512	1.057	2.1746		64	79	75	83	76	50
	6436			glucuronide of C14H26O4 (1)*	LC/MS neg	61876								1.74289	2.88	1.04	0.58	1.61		0.8415	0.8098	0.2315	0.4834	0.2732	0.9683	0.1273	0.7227	0.9378	0.8511	0.4982	0.6731	0.3837	0.8768		0.8751	1.3	0.6708	1.9292	1.1002	1.0793	1.1211	1.5252		64	71	63	83	81	67
	6441			glutamine conjugate of C6H10O2 (1)*	LC/MS neg	63657								0.722558	0.78	0.65	0.63	0.75		0.4221	0.6764	0.9801	0.7485	0.4605	0.9683	0.6315	0.9145	0.5665	0.7508	0.2507	0.5865	0.9648	1		2.1035	2.1303	2.398	1.8627	1.4931	1.809	1.1772	1.5199		93	93	88	100	100	100
	6442			glutamine conjugate of C6H10O2 (2)*	LC/MS neg	63660								0.632146	0.57	0.79	0.57	0.41		0.1415	0.4712	0.3894	0.5708	0.7798	0.9752	0.6945	0.9195	0.3931	0.7023	0.189	0.5485	0.4168	0.8811		2.7954	3.1072	3.9686	2.2458	1.4554	1.6223	1.2884	1.7671		100	100	100	100	100	100
	6443			glutamine conjugate of C7H12O2*	LC/MS neg	63658								0.758727	0.74	0.8	0.58	0.54		0.5134	0.7207	0.8246	0.7092	0.4844	0.9683	0.7475	0.9224	0.4901	0.7286	0.3125	0.6133	0.9752	1		2.1026	2.3792	2.7378	2.0206	1.3188	1.4675	1.17	1.5953		71	71	63	83	81	83
	6460			glycine conjugate of C10H14O2 (1)*	LC/MS neg	62146								1.54598	1.4	1.71	1.1	0.9		0.7486	0.7835	0.0616	0.3359	0.5139	0.9683	0.3975	0.8592	0.0603	0.4636	0.8021	0.7794	0.5142	0.9143		0.8057	1.0171	0.848	1.1863	1.0342	0.7634	1.3049	1.2456		100	100	100	100	100	100
	6462			N-acetylglucosamine conjugate of C24H40O4 bile acid**	LC/MS neg	61869								1.66632	4.39	0.59	0.34	2.53		0.5823	0.743	0.9801	0.7485	0.3197	0.9683	0.4921	0.8715	0.4652	0.7202	0.735	0.7561	0.3013	0.8407		1.7325	2.6456	0.9818	4.3094	1.9738	2.4833	1.4644	2.8869		64	57	63	50	67	67
	6464			metabolonic lactone sulfate	LC/MS neg	63153								1.13089	0.88	1.27	2.52	1.75		0.0144	0.269	0.8769	0.7311	0.3032	0.9683	0.5545	0.9028	0.3738	0.6972	0.0103	0.2852	0.3074	0.8407		0.9558	0.6543	0.6947	0.6139	1.3824	1.2169	1.5479	1.0809		100	100	100	100	100	100
	6465			pentose acid*	LC/MS polar	63264	C00803	HMDB0000892	7991					2.00774	4.1	0.92	0.43	1.92		0.391	0.6625	0.0165	0.237	0.0266	0.8525	0.0027	0.5575	0.8773	0.8441	0.0227	0.3905	0.3357	0.8563		1.0204	1.7816	0.6985	2.8648	1.2875	1.3424	1.2325	2.0487		100	100	100	100	100	100
	6472			branched-chain, straight-chain, or cyclopropyl 10:1 fatty acid (1)*	LC/MS neg	63615								0.581988	0.65	0.51	0.83	1.05		0.545	0.7319	0.0722	0.3499	0.8015	0.9752	0.2892	0.7952	0.1229	0.542	0.521	0.6821	0.8115	0.9933		1.7344	1.3967	1.6897	1.1037	1.3471	1.7792	0.9151	1.0094		100	100	100	100	100	100
	6475			branched-chain, straight-chain, or cyclopropyl 12:1 fatty acid*	LC/MS neg	63683								0.908095	0.85	0.99	0.84	0.72		0.748	0.7835	0.8208	0.7075	0.4908	0.9683	0.5391	0.8965	0.7275	0.8042	0.7814	0.7729	0.4983	0.9029		1.3329	1.4354	1.5524	1.3185	1.1079	1.1135	1.1024	1.2104		100	100	100	100	100	100
	6477			GlcNAc sulfate conjugate of C21H34O2 steroid**	LC/MS neg	63699								0.799388	0.5	0.95	3.89	2.05		0.0065	0.2103	0.1473	0.4379	0.6905	0.9717	0.2147	0.785	0.4222	0.7092	0.0183	0.3614	0.1013	0.7608		1.5368	0.7548	1.0066	0.5029	2.0106	2.067	1.9541	1.2285		93	71	88	50	86	100
	6485			bilirubin degradation product, C16H18N2O5 (1)**	LC/MS neg	64403								0.818223	0.85	0.79	0.94	1.01		0.6828	0.7684	0.4477	0.5956	0.821	0.9752	0.5085	0.8824	0.6878	0.787	0.6342	0.7324	0.9024	1		1.3203	1.2152	1.3154	1.115	1.1854	1.3252	1.0456	1.0803		100	93	100	83	100	100
	6486			bilirubin degradation product, C16H18N2O5 (2)**	LC/MS neg	64404								0.876113	0.85	0.9	1.13	1.06		0.491	0.7159	0.4534	0.597	0.6314	0.9683	0.4104	0.8592	0.8381	0.8351	0.3824	0.6317	0.8876	0.9973		1.168	1.0486	1.1349	0.9622	1.1428	1.2011	1.0844	1.0233		100	100	100	100	100	100
	6487			bilirubin degradation product, C17H18N2O4 (1)**	LC/MS neg	64409								0.973109	0.92	1.01	1.55	1.4		0.0184	0.2868	0.7285	0.6908	0.997	0.9823	0.8177	0.9333	0.7923	0.8241	0.071	0.4717	0.1055	0.7608		0.9557	0.7619	0.7948	0.729	1.1238	1.1165	1.1311	0.93		100	100	100	100	100	100
	6488			bilirubin degradation product, C17H18N2O4 (2)**	LC/MS neg	64407								0.938776	0.88	0.98	1.54	1.37		0.0217	0.2868	0.9213	0.7421	0.9416	0.978	0.9863	0.9453	0.8973	0.8465	0.0711	0.4717	0.126	0.7608		0.9702	0.7671	0.817	0.7172	1.1139	1.1233	1.1045	0.9108		100	100	100	100	100	100
	6489			bilirubin degradation product, C17H18N2O4 (3)**	LC/MS neg	64408								0.909831	0.84	0.96	1.53	1.33		0.0223	0.2868	0.9917	0.7506	0.9242	0.978	0.9436	0.9453	0.9493	0.8516	0.07	0.4717	0.1314	0.7608		1.0192	0.8051	0.8761	0.734	1.1414	1.1622	1.1206	0.9273		100	100	100	100	100	100
	6490			bilirubin degradation product, C17H20N2O5 (1)**	LC/MS neg	64405								1.03565	1.02	1.05	1.37	1.34		0.0327	0.3019	0.9452	0.7446	0.8953	0.9776	0.9664	0.9453	0.8805	0.8441	0.0855	0.507	0.1682	0.7608		1.0378	0.8966	0.8875	0.9057	1.216	1.1881	1.2438	1.0748		100	100	100	100	100	100
	6491			bilirubin degradation product, C17H20N2O5 (2)**	LC/MS neg	64406								1.07079	1.06	1.08	1.38	1.36		0.0261	0.2868	0.8285	0.7104	0.9313	0.978	0.9303	0.9453	0.8203	0.8318	0.0788	0.4868	0.1414	0.7608		1.0468	0.9147	0.8886	0.9407	1.2531	1.2049	1.3012	1.1209		100	100	100	100	100	100
	6492			bilirubin degradation product, C16H18N2O5 (3)**	LC/MS neg	64414								0.906206	0.88	0.93	1.12	1.05		0.541	0.7289	0.5367	0.6238	0.6377	0.9683	0.466	0.8715	0.9117	0.8491	0.4183	0.6396	0.9244	1		1.1973	1.0952	1.1654	1.0251	1.187	1.2292	1.1449	1.085		100	100	100	100	100	100
	6493			bilirubin degradation product, C16H18N2O5 (4)**	LC/MS neg	64415								0.83888	0.83	0.84	1.1	1.09		0.5477	0.7336	0.5227	0.6198	0.6689	0.9683	0.4749	0.8715	0.8731	0.8441	0.4415	0.649	0.9068	1		1.2891	1.1319	1.2355	1.0282	1.2386	1.3427	1.1345	1.0814		100	100	100	100	100	100
	6494			2-amino-4-cyanobutanoate	LC/MS polar	46225								1.02879	0.79	1.26	1.66	1.03		0.2987	0.6119	0.9499	0.7446	0.327	0.9683	0.5362	0.8958	0.433	0.7092	0.1338	0.507	0.9676	1		1.1601	1.0191	1.1412	0.8971	1.3345	1.1791	1.49	1.1935		100	100	100	100	100	100
		N/A	N/A	X-07765	LC/MS neg	46590								1.10311	0.32	1.47	9.9	2.14		0.0712	0.3546	0.2831	0.5113	0.0388	0.9368	0.4801	0.8715	0.0207	0.334	0.005	0.2313	0.8472	0.9953		2.1258	0.8926	1.3551	0.4301	3.5782	2.8966	4.2599	2.345		100	100	100	100	100	100
				X-10458	LC/MS neg	47478								1.91425	1.69	2.21	0.98	0.75		0.3523	0.65	0.0015	0.1476	0.7261	0.9752	0.0444	0.6452	0.0073	0.2651	0.6608	0.7405	0.3907	0.878		0.716	1.1037	0.8202	1.3872	0.9828	0.6117	1.354	1.3706		79	93	88	100	90	67
				X-11299	LC/MS neg	46592								1.1475	0.76	1.34	3.61	2.04		0.0861	0.3822	0.4972	0.6111	0.4896	0.9683	0.9935	0.9453	0.3065	0.6745	0.0733	0.4771	0.4767	0.8977		1.581	0.9131	1.0397	0.7865	2.4821	2.1223	2.842	1.8142		100	100	100	100	100	100
				X-11308	LC/MS neg	46390								1.00808	0.83	1.11	2.21	1.65		0.0035	0.1662	0.9945	0.7518	0.2746	0.9683	0.464	0.8715	0.4077	0.7092	0.0031	0.2261	0.1794	0.7608		1.0395	0.7189	0.7847	0.653	1.3685	1.2943	1.4427	1.0479		100	100	100	100	100	100
				X-11315	LC/MS neg	49592								1.27617	1.86	0.75	0.45	1.11		0.0663	0.3451	0.5399	0.6238	0.0258	0.8525	0.0558	0.6604	0.206	0.6095	0.0033	0.2261	0.7706	0.9875		1.028	1.3934	0.9738	1.813	0.9465	1.0822	0.8109	1.3119		100	100	100	100	95	100
				X-11372	LC/MS neg	46594								1.03059	1.15	0.96	1.4	1.67		0.021	0.2868	0.9389	0.7446	0.7637	0.9752	0.8804	0.9398	0.7772	0.8226	0.1205	0.507	0.0761	0.7604		1.0297	0.8278	0.7705	0.8852	1.2631	1.2889	1.2373	1.0612		100	100	100	100	100	100
				X-11378	LC/MS neg	46595								0.949349	0.86	1.01	1.72	1.46		0.0108	0.2391	0.6844	0.6741	0.5118	0.9683	0.4766	0.8715	0.8505	0.8387	0.0166	0.3505	0.1789	0.7608		1.0523	0.7941	0.854	0.7342	1.2572	1.2506	1.2638	0.999		100	100	100	100	100	100
				X-11381	LC/MS neg	46347								0.848112	0.92	0.79	1.02	1.18		0.5894	0.743	0.4845	0.6083	0.865	0.9757	0.7216	0.9215	0.5146	0.7379	0.781	0.7729	0.634	0.955		1.2259	1.0794	1.1271	1.0318	1.1861	1.3247	1.0476	1.0397		100	100	100	100	100	100
				X-11407	LC/MS neg	46596								0.364668	0.28	0.41	2.73	1.81		0.2569	0.5716	0.0883	0.3753	0.7873	0.9752	0.1826	0.7815	0.273	0.6561	0.2927	0.6091	0.558	0.9318		3.9392	1.7844	2.7989	0.77	3.5912	5.0794	2.103	1.4365		100	93	100	83	100	100
				X-11444	LC/MS neg	46460								1.3731	1.12	1.66	1.36	0.91		0.3026	0.6128	0.0561	0.3282	0.171	0.9683	0.6985	0.9195	0.0163	0.3202	0.7929	0.7767	0.1104	0.7608		0.7746	0.8557	0.8091	0.9024	0.9824	0.74	1.2249	1.0636		86	100	100	100	86	67
				X-11470	LC/MS neg	46601								1.14787	1.06	1.23	1.23	1.06		0.3944	0.6631	0.335	0.5453	0.4961	0.9683	0.8467	0.9333	0.2203	0.6276	0.8965	0.7951	0.3058	0.8407		0.8974	0.8973	0.8711	0.9235	1.0301	0.9236	1.1366	1.0301		93	100	100	100	90	83
				X-11478	LC/MS neg	46602								1.03353	0.83	1.34	1.06	0.65		0.1208	0.4384	0.3778	0.5653	0.2319	0.9683	0.8291	0.9333	0.123	0.542	0.7799	0.7729	0.0684	0.7604		1.1304	1.2516	1.3664	1.1368	1.0471	0.8945	1.1997	1.1683		100	100	100	100	100	100
				X-11483	LC/MS neg	47650								1.13985	1.21	1.11	2.09	2.28		0.2061	0.5235	0.2608	0.5019	0.9313	0.978	0.4147	0.8592	0.4333	0.7092	0.3733	0.6317	0.3623	0.8621		1.7161	1.1558	1.0458	1.2657	2.5165	2.3865	2.6464	1.9561		100	100	100	100	100	100
				X-11578	LC/MS neg	49690								0.596308	0.65	0.56	1.31	1.54		0.0242	0.2868	0.0198	0.24	0.5314	0.9683	0.2301	0.785	0.0272	0.3632	0.2022	0.5536	0.0527	0.7604		1.6141	1.0529	1.2728	0.8329	1.5238	1.9554	1.0922	0.9625		100	100	100	100	100	100
				X-11787	LC/MS pos early	33132								1.10795	1.11	1.1	0.88	0.88		0.4352	0.6863	0.5133	0.6185	0.8565	0.9757	0.7501	0.9224	0.5315	0.7407	0.6515	0.7391	0.5188	0.917		0.9921	1.1127	1.0543	1.1711	0.9787	0.93	1.0273	1.0992		100	100	100	100	100	100
				X-11795	LC/MS pos early	33140								0.703645	1.98	0.47	1.26	5.34		0.0965	0.3962	0.4734	0.6063	0.2947	0.9683	0.2385	0.7881	0.8003	0.8295	0.6305	0.7324	0.0717	0.7604		2.085	0.9782	0.6573	1.299	2.5739	3.5127	1.6351	1.4671		86	93	88	100	90	83
				X-11843	LC/MS neg	46466								2.07008	1.11	3.54	2.06	0.65		0.6786	0.7671	0.3104	0.5304	0.6314	0.9683	0.3171	0.8202	0.6846	0.787	0.5033	0.6738	0.9649	1		2.4573	3.151	2.9811	3.3208	4.393	1.9334	6.8527	5.0868		86	86	75	100	100	100
				X-11847	LC/MS neg	46488								1.32257	10.27	0.4	0.38	9.7		0.1103	0.4137	0.4838	0.6083	0.0728	0.9683	0.0952	0.7173	0.3956	0.704	0.8738	0.7933	0.0254	0.6722		1.072	1.1291	0.2004	2.0578	1.3607	1.9436	0.7778	1.4178		50	50	38	67	67	67
				X-11849	LC/MS neg	46607								2.74322	7.12	0.78	0.25	2.24		0.5684	0.743	0.449	0.5956	0.155	0.9683	0.1457	0.7398	0.608	0.7645	0.5136	0.6776	0.1822	0.7608		0.8992	2.2573	0.5557	3.9589	1.1086	1.2426	0.9746	2.4667		64	57	50	67	76	83
				X-11850	LC/MS neg	46507								3.44002	2.35	5	1.47	0.69		0.6025	0.743	0.2117	0.4771	0.5577	0.9683	0.2195	0.785	0.6123	0.7645	0.4078	0.6317	0.9647	1		0.5168	1.024	0.6105	1.4376	1.2706	0.4232	2.118	1.7778		86	86	88	83	71	83
				X-11852	LC/MS neg	46521								0.833325	5.82	0.75	7.97	61.62		0.0386	0.3116	0.268	0.5032	0.4236	0.9683	0.203	0.785	0.8136	0.8306	0.3193	0.6143	0.0551	0.7604		11.8818	1.2939	0.3795	2.2083	20.4894	23.3842	17.5945	9.9014		79	79	63	100	100	100
				X-11858	LC/MS neg	47654								1.60235	13.97	0.52	0.43	11.48		0.2895	0.6058	0.5473	0.6244	0.0471	0.9456	0.0824	0.6846	0.2823	0.6561	0.4635	0.6607	0.0431	0.7238		1.4915	1.79	0.2391	3.341	2.0914	2.744	1.4389	2.3899		43	43	25	67	62	67
				X-11880	LC/MS neg	46608								1.0336	1.08	1	1.48	1.6		0.0623	0.3419	0.7437	0.6946	0.7248	0.9752	0.9865	0.9453	0.611	0.7645	0.096	0.507	0.2978	0.8396		1.2113	0.9706	0.932	1.0093	1.4927	1.4907	1.4947	1.252		100	100	100	100	100	100
				X-12007	LC/MS neg	46610								2.23244	3.09	1.79	1.13	1.95		0.3776	0.6567	0.1525	0.4439	0.6681	0.9683	0.212	0.785	0.4439	0.7182	0.7311	0.7555	0.3798	0.8733		0.3902	0.5408	0.2646	0.817	0.7205	0.5158	0.9252	0.8711		21	14	0	33	48	50
				X-12013	LC/MS neg	46611								1.30607	0.67	2.28	2.24	0.65		0.9327	0.8342	0.7742	0.6979	0.4544	0.9683	0.7556	0.9257	0.4382	0.7133	0.532	0.6854	0.655	0.9581		0.857	0.8636	1.0359	0.6914	1.1127	0.6781	1.5472	1.1193		29	43	25	67	33	33
				X-12015	LC/MS neg	47390								0.757108	1.13	0.65	2.11	3.64		0.0102	0.2376	0.4263	0.5906	0.2906	0.9683	0.858	0.9338	0.1682	0.5888	0.2221	0.5742	0.0157	0.6553		0.7703	0.3538	0.3321	0.3755	0.9998	1.2085	0.791	0.5832		43	21	13	33	52	83
				X-12026	LC/MS neg	47905								0.879376	0.88	0.88	0.99	0.99		0.7434	0.7821	0.4099	0.5831	0.8372	0.9752	0.6764	0.9186	0.4402	0.7133	0.6896	0.7436	0.9347	1		0.994	0.9397	1.0002	0.8791	0.9284	0.9879	0.869	0.8741		100	100	100	100	90	100
				X-12096	LC/MS pos early	47686								1.19168	0.86	1.84	1.11	0.52		0.6446	0.7591	0.1318	0.4239	0.5286	0.9683	0.5458	0.8975	0.1114	0.5212	0.8985	0.7951	0.4649	0.8977		0.9662	1.1829	1.2743	1.0916	0.9346	0.6581	1.2111	1.1514		100	100	100	100	100	100
				X-12097	LC/MS pos early	47685								1.31861	0.87	2.11	1.38	0.57		0.8701	0.8228	0.1958	0.4697	0.2306	0.9683	0.9473	0.9453	0.0656	0.4655	0.4335	0.6473	0.3591	0.8621		0.7994	0.9526	1.0197	0.8855	0.901	0.5791	1.2228	1.0541		79	79	75	83	95	83
				X-12100	LC/MS pos early	47687								1.05761	0.97	1.16	1	0.84		0.2334	0.5529	0.4598	0.5984	0.3026	0.9683	0.8419	0.9333	0.1875	0.598	0.9011	0.7962	0.139	0.7608		1.0206	1.0934	1.1097	1.0771	1.0066	0.9316	1.0816	1.0794		100	100	100	100	100	100
				X-12101	LC/MS pos early	47642								1.0122	0.72	1.85	0.9	0.35		0.2001	0.5235	0.3628	0.5615	0.4408	0.9683	0.9243	0.9453	0.2106	0.6159	0.6946	0.7445	0.1708	0.7608		1.6885	2.1492	2.5023	1.7962	1.2483	0.8747	1.622	1.7091		100	100	100	100	100	100
				X-12104	LC/MS neg	52597								0.921947	0.93	0.92	0.95	0.96		0.7264	0.7794	0.5329	0.6232	0.8103	0.9752	0.7961	0.9331	0.5176	0.7385	0.6585	0.7405	0.9411	1		1.0685	1.0509	1.0909	1.0108	1.0026	1.046	0.9593	0.9851		100	100	100	100	90	100
				X-12112	LC/MS pos early	47690								1.15767	0.82	1.66	1.36	0.68		0.9267	0.8311	0.5357	0.6232	0.7472	0.9752	0.8413	0.9333	0.4808	0.7273	0.8627	0.7898	0.781	0.9875		1.1492	1.2498	1.372	1.1275	1.2298	0.9264	1.5333	1.3304		93	93	88	100	100	100
				X-12117	LC/MS pos early	47695								1.09314	0.82	1.42	1.46	0.84		0.756	0.7867	0.9918	0.7506	0.4151	0.9683	0.5882	0.9132	0.5351	0.7407	0.3993	0.6317	0.7333	0.9875		0.8074	0.796	0.8755	0.7166	0.8939	0.7392	1.0486	0.8826		64	64	75	50	57	50
				X-12193	LC/MS neg	46985								1.2484	1.84	0.75	0.48	1.18		0.3312	0.6307	0.7558	0.6953	0.0313	0.9124	0.0948	0.7173	0.1554	0.5888	0.021	0.3825	0.4014	0.878		0.9348	1.2172	0.8576	1.5767	0.8846	1.012	0.7572	1.167		86	71	75	67	86	100
				X-12216	LC/MS neg	46613								1.56374	1.34	1.71	1.93	1.51		0.237	0.5569	0.39	0.5708	0.8867	0.9758	0.6286	0.9145	0.452	0.7196	0.3194	0.6143	0.4815	0.8977		1.0198	0.9499	0.8129	1.0868	1.6646	1.2268	2.1025	1.5947		86	86	88	83	90	83
				X-12221	LC/MS neg	47911								1.69927	2.11	1.49	1.36	1.94		0.1929	0.5158	0.2055	0.4728	0.6271	0.9683	0.2405	0.7881	0.5516	0.7437	0.5331	0.6854	0.2309	0.802		0.8742	0.9257	0.5949	1.2566	1.434	1.1536	1.7145	1.4855		64	64	63	67	86	67
				X-12261	LC/MS neg	47657								2.58348	1.78	3.73	1.48	0.71		0.7191	0.7761	0.1298	0.4239	0.7443	0.9752	0.2154	0.785	0.3645	0.6963	0.6074	0.7249	0.982	1		0.3875	0.631	0.4546	0.8074	0.7577	0.3205	1.1948	1.0011		36	50	25	83	52	50
				X-12262	LC/MS neg	47914								1.76419	1.21	2.57	1.45	0.69		0.6557	0.7632	0.2819	0.5113	0.7743	0.9752	0.5927	0.9132	0.3072	0.6745	0.9047	0.7962	0.6233	0.955		0.5636	0.7398	0.669	0.8107	0.8181	0.4583	1.1779	0.9943		29	43	25	67	38	33
				X-12283	LC/MS pos early	47708								1.95738	2.17	1.71	0.7	0.89		0.6709	0.7662	0.023	0.2503	0.3881	0.9683	0.0361	0.6452	0.2641	0.6546	0.3356	0.6229	0.7666	0.9875		0.8047	1.3493	0.8501	1.8485	1.0304	0.7592	1.3017	1.5751		93	93	88	100	90	100
				X-12410	LC/MS neg	47921								1.50242	1.65	1.37	0.91	1.09		0.5717	0.743	0.4466	0.5956	0.6444	0.9683	0.8393	0.9333	0.3607	0.6963	0.4423	0.6491	0.944	1		1.2187	1.5417	1.1652	1.9181	1.508	1.2722	1.7438	1.831		100	100	100	100	100	100
				X-12411	LC/MS neg	46616								1.078	1.31	0.96	1.5	2.03		0.0247	0.2868	0.9682	0.7481	0.2339	0.9683	0.4066	0.8592	0.3854	0.6979	0.3964	0.6317	0.0227	0.6722		1.1808	0.8992	0.7791	1.0194	1.5545	1.5825	1.5265	1.2729		100	100	100	100	100	100
				X-12456	LC/MS neg	47639								0.91178	0.44	1.5	2.75	0.8		0.2422	0.5594	0.4564	0.597	0.0782	0.9683	0.0939	0.7173	0.4294	0.7092	0.031	0.4109	0.6757	0.9672		1.3319	1.0628	1.4773	0.6483	1.4835	1.1865	1.7804	1.2144		93	79	88	67	100	100
				X-12462	LC/MS pos early	46620								0.620699	0.78	0.55	1.58	2.24		0.0055	0.1975	0.0397	0.294	0.3815	0.9683	0.4046	0.8592	0.0299	0.3798	0.1262	0.507	0.0143	0.6553		1.5228	0.8367	0.9404	0.7331	1.6313	2.1053	1.1574	0.9452		100	100	100	100	100	100
				X-12544	LC/MS neg	46510								0.899297	2.02	0.74	2.55	6.98		0.0476	0.3303	0.5337	0.6232	0.236	0.9683	0.2269	0.785	0.667	0.7834	0.5265	0.6848	0.0358	0.7064		1.5352	0.5815	0.385	0.778	2.3343	2.6854	1.9833	1.3806		43	43	13	83	81	83
				X-12680	LC/MS pos early	47437								1.06689	1.46	0.78	0.73	1.36		0.6622	0.7632	0.7137	0.6838	0.1224	0.9683	0.1986	0.785	0.3681	0.6963	0.3963	0.6317	0.1832	0.7608		1.3141	1.3694	1.1155	1.6233	1.3467	1.5127	1.1808	1.402		100	100	100	100	100	100
				X-12707	LC/MS neg	47929								0.674814	0.98	0.52	1.02	1.94		0.0564	0.333	0.0566	0.3282	0.0849	0.9683	0.8942	0.9404	0.0083	0.2703	0.8804	0.7933	0.0169	0.6553		1.4484	0.9759	0.9853	0.9665	1.45	1.9115	0.9884	0.9774		100	100	100	100	100	100
				X-12713	LC/MS neg	47932								0.716285	0.94	0.57	0.91	1.5		0.2029	0.5235	0.0325	0.2894	0.0654	0.9683	0.8274	0.9333	0.004	0.2381	0.6509	0.7391	0.0391	0.7064		1.0433	0.8089	0.8342	0.7836	0.9817	1.2523	0.711	0.7473		93	79	88	67	76	100
				X-12726	LC/MS neg	47936								1.45881	1.69	1.23	0.74	1.01		0.6377	0.7553	0.2892	0.5133	0.7134	0.9736	0.3386	0.8341	0.5994	0.7611	0.5303	0.6849	0.9444	1		0.6859	0.9174	0.6825	1.1524	0.769	0.6893	0.8488	1.0006		36	43	38	50	43	33
				X-12729	LC/MS neg	46623								0.976894	1.89	0.61	0.79	2.47		0.9794	0.8346	0.3236	0.5376	0.2736	0.9683	0.1654	0.7688	0.9338	0.8506	0.3988	0.6317	0.4707	0.8977		1.4282	1.1905	0.8233	1.5576	1.633	2.0331	1.2328	1.3952		86	100	100	100	86	67
				X-12730	LC/MS neg	47937								1.6001	3.44	0.84	0.59	2.41		0.3521	0.65	0.2297	0.4828	0.8061	0.9752	0.3308	0.8296	0.4689	0.7202	0.6048	0.7244	0.4299	0.888		1.2518	1.6283	0.7342	2.5225	1.6265	1.7693	1.4836	2.003		64	71	63	83	86	67
				X-12738	LC/MS neg	47940								1.07695	1.13	1.03	1.06	1.16		0.4037	0.6658	0.9454	0.7446	0.472	0.9683	0.6614	0.9186	0.5543	0.7449	0.2465	0.5865	0.9372	1		0.8993	0.8852	0.8312	0.9392	0.9827	0.9674	0.9979	0.9685		64	50	63	33	81	67
				X-12740	LC/MS neg	46627								0.413832	1	0.28	1.28	4.5		0.1482	0.4785	0.3422	0.5506	0.3422	0.9683	1	0.9453	0.158	0.5888	0.7	0.7459	0.1107	0.7608		0.535	0.1945	0.1945	0.1945	0.5618	0.8754	0.2482	0.2214		7	0	0	0	14	17
				X-12812	LC/MS neg	46986								3.21741	4.62	2.15	0.61	1.31		0.6846	0.7684	0.0519	0.3184	0.3976	0.9683	0.0626	0.666	0.3894	0.7014	0.349	0.6302	0.7659	0.9875		0.7594	1.8494	0.6582	3.0406	1.3533	0.8606	1.846	2.4433		57	71	50	100	71	67
				X-12816	LC/MS neg	46630								0.677591	0.26	1.51	2.86	0.5		0.5953	0.743	0.7316	0.6912	0.2956	0.9683	0.3515	0.841	0.5941	0.7607	0.2391	0.5865	0.7259	0.9859		0.5462	0.46	0.7282	0.1918	0.4563	0.3642	0.5485	0.3701		43	36	50	17	48	33
				X-12818	LC/MS neg	47943								2.15618	5.24	1.33	0.95	3.74		0.137	0.4668	0.0176	0.24	0.1695	0.9683	0.0133	0.6452	0.415	0.7092	0.9288	0.8031	0.0581	0.7604		0.6896	0.9077	0.2908	1.5246	1.2689	1.0884	1.4493	1.4869		36	43	13	83	86	67
				X-12822	LC/MS neg	46997								1.23018	1.17	1.29	1.21	1.1		0.3093	0.6205	0.208	0.475	0.8193	0.9752	0.4842	0.8715	0.2642	0.6546	0.3504	0.6302	0.5938	0.9439		0.8376	0.8651	0.7978	0.9324	1.0029	0.8774	1.1284	1.0304		100	100	100	100	100	100
				X-12830	LC/MS neg	47662								1.9435	2.16	1.84	1.87	2.19		0.1703	0.4944	0.459	0.5984	0.9333	0.978	0.6584	0.9186	0.5361	0.7407	0.2729	0.6061	0.3829	0.8768		0.6195	0.6141	0.3881	0.8401	1.2094	0.8508	1.568	1.204		64	57	63	50	76	67
				X-12839	LC/MS neg	47014								0.928796	0.93	0.93	0.51	0.51		0.1989	0.5235	0.8763	0.7311	0.5405	0.9683	0.6065	0.9145	0.7313	0.8059	0.1575	0.5365	0.6449	0.955		1.0491	1.3371	1.3858	1.2885	0.6864	0.7125	0.6603	0.9744		64	64	75	50	43	50
				X-12844	LC/MS neg	46633								1.15616	1.24	1.08	0.92	1.06		0.4547	0.6951	0.2198	0.4808	0.6934	0.9717	0.5706	0.9083	0.2251	0.6313	0.7894	0.7764	0.4443	0.8925		0.9804	1.0642	0.9507	1.1778	1.0497	1.0102	1.0892	1.1335		100	100	100	100	100	100
				X-12847	LC/MS neg	46364								0.76793	6.29	0.46	1.35	18.2		0.0121	0.2395	0.3606	0.5615	0.0283	0.8652	0.0381	0.6452	0.311	0.6766	0.7872	0.775	0.0022	0.5551		2.2114	0.839	0.2303	1.4478	3.0706	4.1926	1.9486	1.6982		57	57	38	83	81	83
				X-12851	LC/MS neg	46639								0.784816	1.05	0.35	0.2	0.59		0.1404	0.4708	0.2709	0.5038	0.9054	0.9779	0.4116	0.8592	0.4584	0.7202	0.3042	0.6091	0.2819	0.8294		2.2576	2.899	2.8345	2.9634	1.1304	1.6806	0.5802	1.7718		86	79	88	67	67	83
				X-13007	LC/MS neg	47203								1.38517	1.25	1.57	0.94	0.75		0.8364	0.8098	0.6437	0.6647	0.4969	0.9683	0.8834	0.9398	0.3932	0.7023	0.5067	0.6752	0.75	0.9875		0.8817	1.1325	1.0087	1.2563	0.9705	0.7548	1.1862	1.2213		64	57	75	33	62	50
				X-13431	LC/MS pos late	47788								0.952738	0.68	1.22	1.81	1		0.0799	0.366	0.9175	0.7421	0.3189	0.9683	0.4591	0.8715	0.5007	0.7293	0.0423	0.4323	0.5965	0.944		1.2928	1.0839	1.2905	0.8773	1.4406	1.2952	1.586	1.2317		100	100	100	100	100	100
				X-13507	LC/MS pos early	47439								1.26707	1.37	1.15	0.71	0.84		0.516	0.722	0.3671	0.5615	0.4287	0.9683	0.2582	0.7909	0.9327	0.8506	0.2823	0.6091	0.9232	1		0.8522	1.0959	0.9256	1.2661	0.8362	0.7789	0.8935	1.0798		50	64	38	100	62	67
				X-13553	LC/MS neg	47959								0.747317	0.96	0.6	0.92	1.47		0.1987	0.5235	0.0731	0.3508	0.0665	0.9683	0.9751	0.9453	0.0083	0.2703	0.6619	0.7405	0.0389	0.7064		1.2672	1.0056	1.0253	0.9859	1.2086	1.5091	0.908	0.947		100	100	100	100	100	100
				X-13695	LC/MS neg	47962								1.65182	2.37	1.25	0.94	1.78		0.1916	0.5138	0.1042	0.3929	0.8249	0.9752	0.2126	0.785	0.2849	0.6561	0.4107	0.6336	0.304	0.8407		0.795	0.9619	0.571	1.3528	1.1463	1.0189	1.2736	1.3132		64	57	50	67	90	83
				X-13726	LC/MS neg	47967								0.478967	0.43	0.55	0.83	0.66		0.5848	0.743	0.3873	0.5708	0.6029	0.9683	0.8153	0.9333	0.301	0.6736	0.425	0.6449	0.9859	1		1.5951	1.3805	1.9261	0.8348	0.9786	1.2641	0.6932	0.764		36	43	25	67	29	50
				X-13728	LC/MS neg	46645								1.50294	3.92	0.58	0.39	2.63		0.7302	0.7807	0.1971	0.4709	0.1126	0.9683	0.0567	0.6604	0.815	0.8306	0.3427	0.6266	0.1936	0.7702		1.4262	1.9339	0.7854	3.0824	1.6358	2.067	1.2047	2.1435		79	86	75	100	95	83
				X-13729	LC/MS neg	47971								1.06549	1.41	0.84	0.92	1.55		0.6133	0.7492	0.9673	0.7479	0.3486	0.9683	0.5103	0.8824	0.4998	0.7293	0.7429	0.7592	0.3343	0.8563		1.1285	1.0671	0.884	1.2501	1.2638	1.3729	1.1547	1.2024		79	71	88	50	62	67
				X-13844	LC/MS neg	47977								0.780626	1.06	0.56	0.68	1.29		0.8688	0.8228	0.7214	0.6874	0.9105	0.978	0.8697	0.9357	0.7251	0.8023	0.9684	0.811	0.8523	0.9953		1.2873	1.1598	1.1264	1.1932	1.1324	1.4482	0.8167	1.0049		64	64	63	67	71	67
				X-13846	LC/MS neg	47978								2.35448	2.89	1.39	0.27	0.56		0.5734	0.743	0.6398	0.6636	0.8713	0.9757	0.8371	0.9333	0.6367	0.776	0.763	0.7662	0.6266	0.955		0.8971	2.244	1.1536	3.3344	0.7653	0.6406	0.89	2.1122		43	36	38	33	57	50
				X-13866	LC/MS neg	46417								0.802671	0.77	0.85	0.92	0.83		0.7084	0.7761	0.8638	0.7256	0.7796	0.9752	0.942	0.9453	0.7351	0.8083	0.6242	0.7295	0.9495	1		1.5203	1.4638	1.6579	1.2697	1.2768	1.3828	1.1709	1.2203		100	100	100	100	100	100
				X-14056	LC/MS pos early	46632								1.3201	1.51	1.19	1.18	1.49		0.3594	0.6551	0.3114	0.5304	0.5128	0.9683	0.2653	0.793	0.785	0.8228	0.8419	0.7865	0.2937	0.8359		0.8588	0.8659	0.6907	1.0412	1.1266	1.0269	1.2263	1.1337		64	71	63	83	67	67
				X-14082	LC/MS neg	47984								1.65112	1.29	2.52	0.82	0.42		0.7249	0.7791	0.3422	0.5506	0.3788	0.9683	0.9619	0.9453	0.1735	0.5888	0.6895	0.7436	0.4088	0.878		1.0505	1.6927	1.4797	1.9058	1.0922	0.6213	1.5632	1.7345		64	71	75	67	71	50
				X-14904	LC/MS neg	47204								1.44583	1.39	1.5	1.17	1.08		0.5694	0.743	0.7298	0.6909	0.5193	0.9683	0.8401	0.9333	0.4588	0.7202	0.3646	0.6317	0.9593	1		0.7846	0.9003	0.7549	1.0457	1.0186	0.8142	1.223	1.1344		57	50	63	33	62	50
				X-14939	LC/MS neg	46657								1.1962	0.9	1.66	1.17	0.63		0.1202	0.4383	0.1388	0.43	0.0413	0.9368	0.6854	0.9194	0.0102	0.2728	0.6931	0.7445	0.0179	0.6553		0.9643	1.1215	1.1802	1.0629	0.9962	0.7483	1.244	1.1535		100	100	100	100	100	100
				X-15220	LC/MS neg	46658								0.83539	0.66	0.93	2.61	1.83		0.0067	0.2103	0.2786	0.5113	0.9276	0.978	0.4291	0.8612	0.4539	0.7202	0.0319	0.4109	0.0687	0.7604		1.3778	0.8056	0.9735	0.6377	1.7231	1.782	1.6643	1.151		100	93	100	83	100	100
				X-15245	LC/MS neg	46661								1.30246	0.98	1.5	2.49	1.62		0.0633	0.3419	0.5049	0.6158	0.6805	0.9717	0.8633	0.9338	0.4197	0.7092	0.0889	0.507	0.3188	0.8429		1.2223	0.9227	0.9337	0.9117	1.8917	1.511	2.2724	1.592		100	100	100	100	100	100
				X-15461	LC/MS pos early	46283								1.07736	1.1	1.06	1.4	1.44		0.0544	0.333	0.7633	0.6967	0.8314	0.9752	0.7303	0.9215	0.9472	0.8516	0.1904	0.5485	0.1475	0.7608		1.1854	1.018	0.9701	1.066	1.4444	1.4007	1.4882	1.2771		100	100	100	100	100	100
				X-15486	LC/MS neg	46266								1.16289	1.2	1.13	0.95	1.01		0.8763	0.8233	0.4555	0.597	0.5061	0.9683	0.9559	0.9453	0.2922	0.6609	0.7015	0.7461	0.5818	0.9369		1.1118	1.214	1.1037	1.3242	1.1907	1.1199	1.2616	1.2929		100	100	100	100	100	100
				X-15503	LC/MS neg	46977								0.963244	0.88	1.04	1.28	1.09		0.1394	0.4697	0.7645	0.6969	0.4426	0.9683	0.4742	0.8715	0.7237	0.8021	0.0952	0.507	0.6234	0.955		1.0529	0.9493	1.0096	0.8889	1.1178	1.0963	1.1394	1.0142		100	100	100	100	100	100
				X-15523	LC/MS neg	47985								2.50664	0.06	32.27	43.17	0.08		0.967	0.8346	0.6964	0.6788	0.1709	0.9683	0.2375	0.7881	0.4553	0.7202	0.2873	0.6091	0.3686	0.8621		8.5104	8.3472	15.7285	0.966	21.4956	1.2923	41.699	21.3325		100	100	100	100	100	100
				X-15728	LC/MS neg	46666								0.567633	1.38	0.42	1.63	5.42		0.0326	0.3019	0.6102	0.6467	0.7555	0.9752	0.582	0.9098	0.8812	0.8441	0.0649	0.4717	0.2066	0.7818		2.1942	0.8143	0.6832	0.9455	2.6254	3.7052	1.5456	1.2455		86	86	88	83	90	83
				X-16124	LC/MS neg	46461								39.8245	1.71	61.98	62.26	1.72		0.3888	0.6614	0.2297	0.4828	0.6074	0.9683	0.639	0.9145	0.2004	0.6024	0.3042	0.6091	0.8133	0.9933		0.8427	0.8403	0.6196	1.061	33.5625	1.0658	66.0593	33.5601		50	57	50	67	57	50
				X-16580	LC/MS pos early	47804								0.833607	0.64	1.13	1.16	0.65		0.5344	0.7265	0.4436	0.5945	0.1076	0.9683	0.1128	0.7227	0.5136	0.7379	0.4462	0.6493	0.1354	0.7608		1.2807	1.2714	1.5524	0.9904	1.0768	1.0089	1.1448	1.0676		100	100	100	100	100	100
				X-16649	LC/MS neg	47992								0.32795	0.2	0.45	2.25	1.02		0.7993	0.8012	0.0779	0.3522	0.5576	0.9683	0.1152	0.7227	0.3633	0.6963	0.5288	0.6849	0.823	0.9947		1.1084	0.6598	1.096	0.2236	0.8121	1.1208	0.5034	0.3635		50	36	50	17	29	50
				X-16935	LC/MS neg	46681								0.952095	0.49	1.31	3.4	1.28		0.0108	0.2391	0.3697	0.5615	0.0151	0.8182	0.0261	0.6452	0.2218	0.6293	0.0004	0.0685	0.925	1		1.1168	0.7324	0.9812	0.4836	1.4477	1.2525	1.643	1.0633		100	100	100	100	100	100
				X-17010	LC/MS neg	47993								1.18587	1.36	1.03	0.84	1.11		0.4479	0.6928	0.2702	0.5038	0.5211	0.9683	0.2436	0.7881	0.7248	0.8023	0.2959	0.6091	0.9366	1		0.9383	1.048	0.8883	1.2076	1.003	0.9882	1.0178	1.1127		100	100	100	100	100	100
				X-17146	LC/MS neg	46691								0.95477	0.74	2.02	0.54	0.2		0.0119	0.2395	0.3178	0.532	0.9097	0.978	0.55	0.8989	0.4034	0.7076	0.0642	0.4717	0.071	0.7604		2.0252	2.9402	3.3748	2.5055	1.0187	0.6756	1.3618	1.9336		100	100	100	100	100	100
				X-17323	LC/MS pos early	47813								2.06948	3.59	1.04	0.43	1.47		0.8221	0.8082	0.0319	0.2894	0.1221	0.9683	0.0151	0.6452	0.6258	0.7678	0.1829	0.5485	0.3676	0.8621		0.5743	1.066	0.4642	1.6677	0.6968	0.6844	0.7093	1.1885		36	50	25	83	71	50
				X-17325	LC/MS neg	46672								1.95308	3.38	0.66	0.21	1.1		0.6925	0.772	0.5157	0.6186	0.5667	0.9683	0.4131	0.8592	0.9535	0.8516	0.4686	0.6608	0.9047	1		1.232	2.5684	1.1734	3.9635	1.0697	1.2906	0.8488	2.4062		50	57	50	67	67	50
				X-17328	LC/MS pos late	47818								3.65563	7.39	1.11	0.22	1.47		0.4678	0.6986	0.099	0.3857	0.0815	0.9683	0.0254	0.6452	0.9406	0.8511	0.0665	0.4717	0.48	0.8977		0.5375	1.827	0.4357	3.2184	0.6754	0.6394	0.7113	1.9649		36	29	25	33	38	50
				X-17335	LC/MS pos late	47820								1.06707	1.08	1.05	0.88	0.9		0.6772	0.7671	0.9389	0.7446	0.873	0.9757	0.9555	0.9453	0.8592	0.8417	0.8472	0.7865	0.6992	0.9742		0.741	0.8115	0.7801	0.8428	0.7203	0.702	0.7386	0.7907		64	57	75	33	57	50
				X-17346	LC/MS neg	47997								0.975661	0.86	1.1	1.2	0.93		0.4819	0.7091	0.7768	0.6979	0.6427	0.9683	0.9034	0.9427	0.5756	0.7549	0.3828	0.6317	0.8714	0.9953		1.0025	0.963	1.0373	0.8887	1.0176	0.9677	1.0675	0.9781		57	57	63	50	81	50
				X-17348	LC/MS neg	46989								1.28403	0.68	1.79	3.15	1.19		0.5219	0.722	0.8218	0.7079	0.4874	0.9683	0.5373	0.8958	0.7237	0.8021	0.3189	0.6143	0.9708	1		0.5165	0.3954	0.471	0.3198	0.7843	0.562	1.0067	0.6632		43	36	50	17	48	33
				X-17351	LC/MS neg	48001								2.30646	2.7	1.67	0.38	0.62		0.1065	0.4075	0.0388	0.2939	0.3478	0.9683	0.0452	0.6452	0.3734	0.6972	0.0588	0.4717	0.6376	0.955		0.8112	1.855	1.0023	2.7077	0.8272	0.6201	1.0344	1.871		79	86	75	100	76	83
				X-17353	LC/MS neg	48003								2.07812	1.02	3.14	3.05	1		0.4077	0.6679	0.3464	0.5525	0.3985	0.9683	0.947	0.9453	0.1839	0.5974	0.213	0.5627	0.9911	1		0.5223	0.5295	0.5233	0.5358	1.0781	0.5213	1.635	1.0854		14	21	25	17	19	0
				X-17357	LC/MS neg	48009								1.18991	1.24	1.14	0.98	1.06		0.9603	0.8346	0.1014	0.3897	0.8035	0.9752	0.2029	0.785	0.2894	0.6594	0.8812	0.7933	0.8412	0.9953		0.912	0.9904	0.8846	1.0962	1.0068	0.9394	1.0743	1.0852		93	100	100	100	95	83
				X-17361	LC/MS neg	48013								2.29678	1	3.59	3.59	1		0.3667	0.6553	0.3667	0.5615	0.3667	0.9683	1	0.9453	0.1793	0.5916	0.1793	0.5483	1	1		0.342	0.342	0.342	0.342	0.7855	0.342	1.229	0.7855		7	7	13	0	19	0
				X-17365	LC/MS neg	46976								3.38957	5.02	1.72	0.33	0.97		0.5309	0.7265	0.0948	0.3809	0.5417	0.9683	0.1266	0.7227	0.413	0.7092	0.3554	0.6317	0.9911	1		0.5252	1.6006	0.532	2.6692	0.7048	0.5184	0.8912	1.7802		21	21	13	33	38	33
				X-17367	LC/MS neg	46994								1.57167	2.46	0.78	0.35	1.12		0.8439	0.8098	0.5677	0.6291	0.5013	0.9683	0.4052	0.8592	0.9391	0.8511	0.5146	0.6776	0.7487	0.9875		0.9306	1.5203	0.8799	2.1607	0.8729	0.9813	0.7646	1.4626		29	36	25	50	52	33
				X-17398	LC/MS neg	48051								2.45258	1.03	3.78	3.96	1.08		0.505	0.7176	0.6067	0.6448	0.6796	0.9717	0.9453	0.9453	0.4874	0.7286	0.4193	0.6396	0.8639	0.9953		0.7139	0.6971	0.6879	0.7064	1.7677	0.7399	2.7955	1.7509		7	7	0	17	19	17
				X-17438	LC/MS neg	46705								0.825787	0.88	0.79	1.3	1.46		0.0584	0.3352	0.3169	0.532	0.5782	0.9683	0.7621	0.9258	0.2452	0.6472	0.3008	0.6091	0.1001	0.7608		1.1595	0.8867	0.941	0.8324	1.2304	1.3781	1.0827	0.9575		100	100	100	100	100	100
				X-17653	LC/MS neg	46707								0.938489	0.86	0.99	1.79	1.54		0.0576	0.3352	0.5623	0.6291	0.5197	0.9683	0.413	0.8592	0.9611	0.8542	0.0581	0.4717	0.3824	0.8768		1.1055	0.8081	0.8712	0.745	1.3349	1.3398	1.33	1.0375		100	93	100	83	100	100
				X-17654	LC/MS neg	46709								1.01028	1.19	0.92	1.51	1.95		0.0034	0.1662	0.9542	0.745	0.932	0.978	0.9237	0.9453	0.9833	0.8587	0.0272	0.4109	0.0362	0.7064		1.1767	0.8713	0.7968	0.9457	1.4942	1.5566	1.4318	1.1888		100	100	100	100	100	100
				X-17655	LC/MS neg	48019								0.805549	1	0.69	1.14	1.65		0.1593	0.4918	0.4248	0.5906	0.4248	0.9683	1	0.9453	0.2342	0.6358	0.6382	0.7324	0.1412	0.7608		0.4325	0.3259	0.3259	0.3259	0.4549	0.539	0.3709	0.3484		7	7	0	17	10	17
				X-17676	LC/MS neg	46970								1.1174	1.3	0.96	0.84	1.14		0.6685	0.7662	0.6705	0.6684	0.8002	0.9752	0.6491	0.9164	0.8969	0.8465	0.8952	0.7951	0.6478	0.955		0.971	1.042	0.9074	1.1765	1.0141	1.0346	0.9935	1.085		93	93	88	100	100	100
				X-17682	LC/MS neg	48024								0.938501	0.83	1.05	1.27	1.01		0.1828	0.5053	0.6273	0.6579	0.7138	0.9736	0.5679	0.9083	0.9287	0.8506	0.2033	0.5543	0.5105	0.9122		1.0488	0.9546	1.0431	0.8661	1.0785	1.0545	1.1025	0.9843		93	86	88	83	100	100
				X-17685	LC/MS neg	48025								1.30952	1.5	1.19	1.22	1.54		0.1031	0.4043	0.8094	0.7053	0.9031	0.9776	0.8076	0.9333	0.9285	0.8506	0.2518	0.5879	0.2357	0.8037		0.9195	0.9056	0.725	1.0862	1.2181	1.1141	1.3221	1.2041		79	71	75	67	86	83
				X-17686	LC/MS neg	48026								1.08296	3.19	0.43	0.43	3.22		0.3782	0.6567	0.2812	0.5113	0.0077	0.8182	0.0126	0.6452	0.1979	0.6021	0.0085	0.268	0.1989	0.7702		1.8201	1.8073	0.8632	2.7514	1.9839	2.7771	1.1907	1.9711		57	71	50	100	62	67
				X-17690	LC/MS neg	46710								1.66701	2.1	1.58	3.74	4.97		0.013	0.2526	0.1709	0.455	0.4066	0.9683	0.1425	0.7398	0.677	0.787	0.1882	0.5485	0.0264	0.6722		1.9346	1.005	0.6481	1.3619	4.1546	3.221	5.0881	3.225		57	57	38	83	95	83
				X-17692	LC/MS neg	47001								2.59179	1.76	3.32	2.16	1.15		0.1892	0.51	0.0204	0.24	0.3781	0.9683	0.3064	0.812	0.0178	0.3221	0.1035	0.507	0.7657	0.9875		0.3824	0.4919	0.3563	0.6276	0.8816	0.4086	1.3546	0.9911		14	29	13	50	52	17
				X-17761	LC/MS pos late	47832								0.939537	1.01	0.86	0.83	0.97		0.9635	0.8346	0.7752	0.6979	0.7084	0.9717	0.6584	0.9186	0.947	0.8516	0.8054	0.7794	0.7782	0.9875		1.1627	1.187	1.1794	1.1946	1.068	1.1459	0.9901	1.0924		93	79	88	67	100	100
				X-17765	LC/MS neg	48055								0.57656	0.89	0.45	1.25	2.47		0.2528	0.5665	0.4328	0.5929	0.3988	0.9683	0.9677	0.9453	0.2251	0.6313	0.8179	0.7817	0.185	0.7643		1.1024	0.6004	0.635	0.5658	1.1376	1.5697	0.7055	0.6356		57	50	50	50	67	67
				X-17969	LC/MS neg	47323								0.908672	0.9	0.92	0.56	0.55		0.5105	0.719	0.7509	0.6953	0.5097	0.9683	0.5127	0.8829	0.7966	0.8268	0.3253	0.6183	0.9994	1		0.9548	1.1731	1.2322	1.114	0.6493	0.6774	0.6212	0.8676		57	71	50	100	67	67
				X-18240	LC/MS neg	48041								0.636523	0.78	0.54	1.01	1.46		0.7432	0.7821	0.6976	0.6788	0.6426	0.9683	0.9595	0.9453	0.5233	0.7385	0.9182	0.8022	0.5957	0.9439		1.087	0.7855	0.884	0.687	0.9934	1.2901	0.6967	0.6919		43	36	38	33	33	50
				X-18345	LC/MS neg	47342								2.14879	2.71	1.33	0.33	0.68		0.4182	0.6736	0.4491	0.5956	0.8585	0.9757	0.6965	0.9195	0.4831	0.7273	0.6342	0.7324	0.5072	0.9077		0.9927	2.1893	1.1805	3.198	0.9366	0.8049	1.0683	2.1331		50	57	63	50	57	33
				X-18779	LC/MS neg	46687								0.752001	0.82	0.7	1.16	1.37		0.0733	0.3576	0.0281	0.2667	0.5545	0.9683	0.2613	0.7909	0.0373	0.4172	0.3534	0.6317	0.1102	0.7608		1.1742	0.9052	0.992	0.8183	1.152	1.3563	0.9477	0.883		100	100	100	100	100	100
				X-18886	LC/MS neg	48047								0.742808	0.72	0.76	1.2	1.14		0.2153	0.5301	0.0781	0.3522	0.9052	0.9779	0.2623	0.7909	0.1553	0.5888	0.3971	0.6317	0.3599	0.8621		1.2306	0.9905	1.1486	0.8325	1.1541	1.3125	0.9958	0.9141		100	100	100	100	100	100
				X-18887	LC/MS neg	47301								0.679656	0.7	0.66	0.71	0.75		0.1654	0.4944	0.0216	0.2434	0.8809	0.9757	0.138	0.7398	0.063	0.4636	0.2475	0.5865	0.401	0.878		1.3011	1.2641	1.4909	1.0373	0.9213	1.1113	0.7313	0.8843		100	93	100	83	100	100
				X-18899	LC/MS neg	47670								1.57937	1.18	1.88	2.17	1.36		0.1209	0.4384	0.3665	0.5615	0.3268	0.9683	0.9576	0.9453	0.1614	0.5888	0.0611	0.4717	0.6909	0.9712		0.48	0.4432	0.4073	0.479	0.7949	0.5527	1.0372	0.7581		43	36	50	17	57	33
				X-18901	LC/MS neg	46690								1.22177	1.83	0.77	0.56	1.33		0.9849	0.8362	0.9917	0.7506	0.07	0.9683	0.2199	0.785	0.1669	0.5888	0.1734	0.5413	0.2129	0.7873		1.0227	1.2402	0.8765	1.604	1.032	1.1689	0.895	1.2495		86	79	75	83	76	100
				X-18913	LC/MS neg	46695								1.14888	1.63	0.81	0.71	1.43		0.9114	0.8282	0.4132	0.5843	0.1439	0.9683	0.1284	0.7227	0.619	0.7658	0.3063	0.6091	0.288	0.8358		1.1116	1.2058	0.9167	1.495	1.1829	1.3065	1.0593	1.2771		100	100	100	100	100	100
				X-18921	LC/MS neg	47671								0.798349	0.65	0.98	1.25	0.82		0.9268	0.8311	0.5911	0.6374	0.0853	0.9683	0.1297	0.7243	0.3615	0.6963	0.2157	0.5673	0.219	0.7921		1.4297	1.2941	1.5716	1.0167	1.277	1.2878	1.2662	1.1414		100	100	100	100	100	100
				X-18922	LC/MS neg	46700								1.31612	1.09	1.55	1.34	0.94		0.36	0.6551	0.0903	0.3753	0.3243	0.9683	0.62	0.9145	0.0476	0.4259	0.1577	0.5365	0.9615	1		0.8209	0.8846	0.8454	0.9237	1.0168	0.7965	1.2372	1.0804		100	100	100	100	100	100
				X-19141	LC/MS neg	46701								1.05258	1.26	0.88	0.82	1.19		0.9579	0.8346	0.7134	0.6838	0.2456	0.9683	0.3052	0.8104	0.5465	0.7428	0.3608	0.6317	0.454	0.8977		1.181	1.22	1.0777	1.3623	1.204	1.2842	1.1238	1.2431		100	100	100	100	100	100
				X-19299	LC/MS neg	47673								1.5855	1.01	3.58	1.03	0.29		0.4558	0.6951	0.5677	0.6291	0.2021	0.9683	0.6299	0.9145	0.1683	0.5888	0.684	0.7431	0.1772	0.7608		1.2526	1.9502	1.9427	1.9577	1.2884	0.5625	2.0143	1.986		93	93	100	83	90	83
				X-19438	LC/MS neg	46261								1.26545	1.06	1.43	1.63	1.21		0.1847	0.5077	0.8713	0.7303	0.6175	0.9683	0.8205	0.9333	0.62	0.7658	0.1727	0.5413	0.5717	0.9343		1.0326	0.9647	0.9344	0.9951	1.3746	1.1308	1.6183	1.3067		100	100	100	100	100	100
				X-21258	LC/MS neg	46259								0.916742	1.99	0.64	1.27	3.91		0.301	0.6119	0.5407	0.6238	0.1994	0.9683	0.205	0.785	0.6072	0.7645	0.8471	0.7865	0.1231	0.7608		1.8857	1.1469	0.768	1.5258	2.4675	3.0033	1.9316	1.7287		100	100	100	100	100	100
				X-21285	LC/MS neg	46294								0.767801	0.66	0.85	1.61	1.26		0.089	0.3869	0.6858	0.6744	0.7828	0.9752	0.9309	0.9453	0.6103	0.7645	0.2762	0.6062	0.1822	0.7608		1.2429	0.9167	1.1017	0.7316	1.2806	1.3842	1.1771	0.9543		93	86	88	83	100	100
				X-21286	LC/MS neg	46295								0.996297	0.88	1.14	1.08	0.83		0.8915	0.8255	0.6554	0.6683	0.1574	0.9683	0.212	0.785	0.4596	0.7202	0.2431	0.5865	0.3857	0.878		1.0533	1.0794	1.1483	1.0104	1.0233	0.9582	1.0884	1.0494		100	100	100	100	100	100
				X-21310	LC/MS neg	46354								1.01262	0.87	1.14	1.45	1.11		0.0267	0.2868	0.3713	0.5624	0.1023	0.9683	0.0922	0.7138	0.5647	0.7508	0.0052	0.2313	0.6688	0.9652		0.9193	0.8142	0.87	0.7584	1.036	0.9685	1.1034	0.9309		100	100	100	100	100	100
				X-21312	LC/MS neg	46356								4.2238	15.15	1.18	0.28	3.59		0.968	0.8346	0.0334	0.2894	0.0451	0.9456	0.0069	0.6452	0.918	0.8491	0.1206	0.507	0.1794	0.7608		0.685	2.4087	0.2983	4.5191	1.1696	1.0718	1.2674	2.8933		50	64	38	100	71	67
				X-21315	LC/MS neg	46359								0.608645	0.24	1.18	3.27	0.65		0.8892	0.8255	0.0494	0.3184	0.2929	0.9683	0.0449	0.6452	0.4698	0.7202	0.371	0.6317	0.5375	0.922		1.4736	1.1015	1.7832	0.4198	1.2689	1.1639	1.374	0.8969		93	93	88	100	86	100
				X-21319	LC/MS neg	46363								1.1474	0.98	1.37	1.05	0.75		0.2365	0.5569	0.1601	0.4541	0.3108	0.9683	0.7857	0.9328	0.0735	0.4655	0.8954	0.7951	0.1435	0.7608		1.0027	1.1356	1.1476	1.1236	1.0176	0.8578	1.1773	1.1505		86	100	100	100	90	67
				X-21339	LC/MS neg	46384								1.02413	0.81	1.14	2.49	1.77		0.0093	0.2337	0.8025	0.7032	0.2051	0.9683	0.4897	0.8715	0.2549	0.6506	0.0046	0.2313	0.3286	0.8528		1.1728	0.7683	0.8476	0.6891	1.6056	1.498	1.7131	1.2011		100	100	100	100	100	100
				X-21342	LC/MS neg	46387								0.753509	0.83	0.69	1.03	1.23		0.6503	0.7625	0.0659	0.3429	0.7928	0.9752	0.2793	0.7934	0.1136	0.5212	0.8859	0.7938	0.6313	0.955		1.3323	1.0909	1.1951	0.9867	1.2454	1.4696	1.0212	1.0039		100	100	100	100	100	100
				X-21353	LC/MS neg	46398								1.08778	0.8	1.52	1.28	0.67		0.8818	0.8233	0.7823	0.6984	0.151	0.9683	0.4294	0.8612	0.1987	0.6021	0.329	0.6183	0.2849	0.8317		1.1096	1.1926	1.328	1.0572	1.124	0.8912	1.3568	1.207		100	100	100	100	100	100
				X-21364	LC/MS neg	46409								0.888278	0.71	1.07	1.54	1.02		0.3651	0.6551	0.9569	0.7451	0.6058	0.9683	0.702	0.9195	0.7286	0.8043	0.2883	0.6091	0.7913	0.9875		1.0911	0.9223	1.0802	0.7644	1.138	1.102	1.174	0.9692		100	100	100	100	100	100
				X-21383	LC/MS neg	46428								1.46663	1.15	1.78	1.56	1.01		0.8231	0.8082	0.1337	0.4257	0.3405	0.9683	0.7038	0.9195	0.0694	0.4655	0.3776	0.6317	0.6218	0.955		0.8317	0.8902	0.8268	0.9535	1.1614	0.8366	1.4861	1.2198		100	100	100	100	100	100
				X-21410	LC/MS neg	46455								0.661111	0.69	0.64	1.47	1.59		0.128	0.4488	0.2358	0.4866	0.5967	0.9683	0.6542	0.9186	0.2005	0.6024	0.446	0.6493	0.1691	0.7608		1.3559	0.8875	1.0489	0.7261	1.3648	1.6628	1.0667	0.8964		100	100	100	100	100	100
				X-21441	LC/MS neg	46486								0.711047	0.56	0.86	1.47	0.96		0.4027	0.6658	0.1904	0.4647	0.554	0.9683	0.2034	0.785	0.5826	0.7555	0.2863	0.6091	0.8678	0.9953		1.1777	0.9379	1.1988	0.677	1.0771	1.1565	0.9977	0.8374		100	100	100	100	100	100
				X-21442	LC/MS neg	46487								1.16194	1.2	1.13	0.98	1.03		0.6068	0.7441	0.9089	0.7412	0.7101	0.9722	0.8628	0.9338	0.7154	0.7978	0.507	0.6752	0.9232	1		0.6978	0.7534	0.6858	0.821	0.7552	0.7097	0.8007	0.8108		57	50	63	33	67	50
				X-21467	LC/MS neg	46512								1.06631	0.59	1.7	2.17	0.75		0.3881	0.6614	0.7774	0.6979	0.0323	0.9124	0.1002	0.7173	0.1525	0.5888	0.0261	0.4109	0.3668	0.8621		1.113	1.0092	1.2687	0.7496	1.2906	0.9572	1.624	1.1868		100	100	100	100	100	100
				X-21470	LC/MS neg	46515								0.649764	0.55	0.73	1.8	1.35		0.0713	0.3546	0.2316	0.4834	0.8742	0.9757	0.4821	0.8715	0.3087	0.6766	0.2097	0.559	0.1837	0.7608		1.5067	0.9904	1.2804	0.7004	1.4954	1.7331	1.2576	0.979		100	93	100	83	100	100
				X-21471	LC/MS neg	46516								0.92332	0.61	1.25	2.01	0.97		0.2574	0.5716	0.2176	0.4808	0.1637	0.9683	0.0814	0.684	0.9006	0.8465	0.0621	0.4717	0.856	0.9953		0.9507	0.7747	0.9652	0.5842	1.0538	0.9362	1.1714	0.8778		93	79	100	50	90	83
				X-21607	LC/MS neg	46674								1.28958	1.45	1.1	0.64	0.84		0.1884	0.51	0.3652	0.5615	0.9545	0.978	0.5172	0.8853	0.523	0.7385	0.301	0.6091	0.3944	0.878		1.0118	1.3426	1.0975	1.5878	0.9739	0.926	1.0218	1.3048		100	93	100	83	100	100
				X-21628	LC/MS neg	46696								0.862472	0.77	0.99	1	0.78		0.2181	0.5339	0.163	0.455	0.3169	0.9683	0.1109	0.7227	0.7596	0.8177	0.8585	0.7881	0.1372	0.7608		1.0856	1.0803	1.2231	0.9376	0.9415	0.948	0.935	0.9363		100	100	100	100	100	100
				X-21661	LC/MS neg	46730								3.90159	10.64	0.8	0.16	2.17		0.8971	0.8273	0.2957	0.519	0.0857	0.9683	0.0662	0.666	0.5975	0.7609	0.163	0.5365	0.2784	0.8294		0.439	1.61	0.2766	2.9434	0.5418	0.6014	0.4822	1.7128		14	14	0	33	29	33
				X-21669	LC/MS neg	46743								0.442938	0.47	0.42	1.15	1.27		0.135	0.4637	0.0018	0.1476	0.602	0.9683	0.0623	0.666	0.006	0.2599	0.4554	0.6571	0.1765	0.7608		2.1976	1.4212	1.9388	0.9036	1.7498	2.4564	1.0433	0.9734		100	100	100	100	100	100
				X-21733	LC/MS neg	46902								0.885645	0.79	1.06	0.73	0.54		0.0145	0.269	0.8849	0.7323	0.3205	0.9683	0.4441	0.8659	0.522	0.7385	0.2449	0.5865	0.0218	0.661		1.1578	1.3449	1.5024	1.1874	0.8383	0.8132	0.8635	1.0254		100	100	100	100	100	100
				X-21736	LC/MS neg	46905								0.71836	0.57	1.12	0.74	0.38		0.3504	0.6491	0.5071	0.6162	0.3473	0.9683	0.2839	0.7934	0.8332	0.8351	0.9963	0.8124	0.2113	0.7865		1.6514	1.8807	2.3987	1.3626	0.957	0.904	1.0101	1.1863		100	100	100	100	100	100
				X-21742	LC/MS neg	46911								8.95526	8.36	12.89	0.23	0.15		0.4389	0.6892	0.1792	0.4558	0.8062	0.9752	0.4554	0.8701	0.2331	0.6358	0.69	0.7436	0.4941	0.9029		1.0372	8.4371	1.8025	15.0716	1.8885	0.2719	3.5052	9.2884		29	43	38	50	43	17
				X-21752	LC/MS neg	46923								2.27567	2.6	1.78	0.45	0.65		0.2389	0.5569	0.2657	0.5032	0.0902	0.9683	0.0623	0.666	0.6475	0.7814	0.0344	0.4178	0.7155	0.9825		1.0208	2.224	1.2364	3.2116	1.1198	0.8053	1.4343	2.323		79	93	88	100	62	67
				X-21788	LC/MS neg	46964								0.964433	0.95	0.98	1.19	1.15		0.221	0.5378	0.6763	0.6697	0.8395	0.9752	0.6775	0.9186	0.8716	0.8434	0.2841	0.6091	0.4886	0.8993		0.9728	0.8821	0.9067	0.8574	1.029	1.0389	1.0191	0.9382		86	79	88	67	81	83
				X-21803	LC/MS neg	46980								1.7642	2.74	1.7	9.31	15.04		0.0456	0.3275	0.3529	0.5566	0.973	0.9807	0.5465	0.8975	0.4691	0.7202	0.1226	0.507	0.1792	0.7608		0.5598	0.1307	0.0698	0.1915	1.4167	1.0497	1.7837	0.9876		14	14	0	33	52	33
				X-21807	LC/MS neg	46984								1.81659	2.68	1.26	0.73	1.55		0.9799	0.8346	0.0755	0.3522	0.2445	0.9683	0.0511	0.6507	0.6277	0.7687	0.3907	0.6317	0.4225	0.8825		0.6123	0.8835	0.4806	1.2863	0.8411	0.7439	0.9383	1.1123		21	29	13	50	52	33
				X-21815	LC/MS neg	46992								0.987858	1.36	0.44	0.22	0.68		0.0396	0.3131	0.9778	0.7485	0.3413	0.9683	0.5336	0.8958	0.4613	0.7202	0.0261	0.4109	0.4341	0.8882		1.3672	1.9194	1.6278	2.211	0.7984	1.1066	0.4903	1.3506		50	57	63	50	24	33
				X-21831	LC/MS neg	47008								1.65046	0.99	2.38	2.2	0.91		0.8941	0.8263	0.6193	0.6525	0.5915	0.9683	0.9785	0.9453	0.4395	0.7133	0.6155	0.7278	0.7861	0.9875		0.8065	0.8386	0.844	0.8331	1.2991	0.7689	1.8292	1.3311		14	29	25	33	10	0
				X-21834	LC/MS neg	47011								0.584542	1.03	0.43	1.16	2.78		0.1746	0.4958	0.4793	0.6063	0.4178	0.9683	0.3104	0.8134	0.9376	0.8511	0.6728	0.7422	0.1482	0.7608		2.4337	1.3033	1.287	1.3196	2.5529	3.5803	1.5255	1.4226		79	86	75	100	95	83
				X-21839	LC/MS neg	47016								1.9748	3.17	1.38	0.88	2.02		0.2724	0.5871	0.2385	0.4867	0.4032	0.9683	0.1791	0.7795	0.7922	0.8241	0.8409	0.7865	0.1971	0.7702		0.7222	0.9981	0.479	1.5172	1.1504	0.9655	1.3353	1.4262		43	36	25	50	67	67
				X-21840	LC/MS neg	47017								2.54234	0.87	4.4	4.51	0.9		0.4191	0.6743	0.4719	0.6063	0.2991	0.9683	0.8275	0.9333	0.1905	0.5994	0.1696	0.5413	0.8746	0.9953		0.8301	0.8205	0.8754	0.7656	2.12	0.7848	3.4551	2.1104		36	29	38	17	38	33
				X-21842	LC/MS neg	47019								1.07028	0.78	1.34	1.86	1.09		0.196	0.5231	0.8139	0.7058	0.4395	0.9683	0.7168	0.9215	0.4498	0.7196	0.1246	0.507	0.7205	0.983		0.6545	0.5585	0.6268	0.4902	0.7965	0.6822	0.9108	0.7005		29	36	25	50	52	33
				X-21845	LC/MS neg	47022								1.67888	1.05	2.33	2.16	0.97		0.4042	0.6658	0.2726	0.5046	0.3537	0.9683	0.907	0.9435	0.1328	0.5602	0.1899	0.5485	0.9492	1		0.4011	0.4164	0.4066	0.4261	0.6581	0.3956	0.9206	0.6734		21	14	13	17	29	33
				X-21851	LC/MS neg	47028								0.936563	0.88	1	0.99	0.88		0.8596	0.8171	0.5217	0.6198	0.9459	0.978	0.6341	0.9145	0.6667	0.7834	0.9348	0.8045	0.8696	0.9953		1.0073	1.0097	1.0727	0.9467	0.941	0.9419	0.9401	0.9434		93	79	88	67	86	100
				X-22143	LC/MS neg	47389								1.01822	1.09	0.98	1.44	1.6		0.1572	0.4918	0.833	0.7125	0.8383	0.9752	0.9963	0.9453	0.7557	0.8156	0.3581	0.6317	0.2753	0.8294		1.0043	0.8063	0.7728	0.8398	1.2206	1.2358	1.2053	1.0226		71	71	63	83	81	83
				X-22162	LC/MS pos early	47417								1	1.17	0.86	0.85	1.16		0.9538	0.8346	0.7467	0.6953	0.352	0.9683	0.6808	0.9186	0.3479	0.6963	0.4574	0.6585	0.5564	0.9302		0.951	0.9552	0.8817	1.0286	0.9469	1.0202	0.8735	0.951		86	79	88	67	71	83
				X-22509	LC/MS neg	47773								0.958579	3.11	0.37	0.43	3.65		0.5039	0.7176	0.8725	0.7307	0.0206	0.8525	0.1366	0.7398	0.0601	0.4636	0.1955	0.5495	0.0449	0.7312		0.5432	0.4798	0.2335	0.7262	0.584	0.8529	0.3151	0.5207		36	21	13	33	33	67
				X-22520	LC/MS neg	47784								0.659702	0.19	1.27	5	0.76		0.3271	0.63	0.0763	0.3522	0.0026	0.8182	0.0017	0.5575	0.2855	0.6561	0.0031	0.2261	0.1352	0.7608		0.9859	0.6687	1.1206	0.2167	0.9677	0.8512	1.0841	0.6504		79	64	100	17	76	50
				X-22771	LC/MS neg	48076								0.64202	0.66	0.63	1.62	1.7		0.1092	0.4115	0.4396	0.5945	0.9601	0.978	0.6266	0.9145	0.5365	0.7407	0.2396	0.5865	0.2629	0.8277		1.0752	0.6607	0.7951	0.5263	1.1048	1.3552	0.8543	0.6903		50	36	38	33	62	67
				X-22776	LC/MS neg	48081								0.965902	0.96	0.98	0.76	0.74		0.0187	0.2868	0.8114	0.7055	0.8449	0.9757	0.7709	0.9278	0.9742	0.8575	0.0966	0.507	0.0821	0.7608		1.0851	1.2184	1.245	1.1918	0.9147	0.9252	0.9043	1.0481		86	100	100	100	90	67
				X-22834	LC/MS neg	48185								0.683607	0.31	1.1	3.22	0.91		0.355	0.6512	0.229	0.4828	0.0088	0.8182	0.0111	0.6452	0.2479	0.6472	0.0087	0.268	0.2219	0.7933		1.0822	0.7426	1.1347	0.3504	1.0794	1.0298	1.1291	0.7398		93	86	100	67	86	83
				X-23157	LC/MS neg	48771								0.539576	0.26	1.26	1.89	0.39		0.3396	0.6415	0.1622	0.455	0.0116	0.8182	0.0096	0.6452	0.3551	0.6963	0.2083	0.559	0.0201	0.6553		1.1459	1.0381	1.6486	0.4275	0.7262	0.6433	0.809	0.6183		71	71	100	33	62	33
				X-23276	LC/MS neg	48972								1.31918	1.79	1.05	1.03	1.76		0.3861	0.6614	0.1751	0.4558	0.3894	0.9683	0.1395	0.7398	0.702	0.7923	0.9963	0.8124	0.2488	0.8207		0.6122	0.6193	0.4436	0.7949	0.8005	0.7808	0.8203	0.8076		50	50	38	67	67	67
				X-23583	LC/MS pos early	49459								0.704756	0.42	1.55	1.25	0.34		0.5742	0.743	0.6647	0.6683	0.2702	0.9683	0.649	0.9164	0.2509	0.65	0.6803	0.7431	0.2655	0.8277		1.4571	1.5461	2.1798	0.9124	0.938	0.7345	1.1414	1.0269		50	64	50	83	76	50
				X-23587	LC/MS pos early	49463								2.25223	0.68	4.63	4.51	0.66		0.3422	0.6418	0.0597	0.335	0.3822	0.9683	0.4789	0.8715	0.0411	0.4259	0.1749	0.5418	0.9585	1		0.8984	0.9086	1.0821	0.7351	2.0132	0.7147	3.3117	2.0234		57	71	50	100	86	67
				X-23593	LC/MS pos early	49469								0.914736	1.07	0.8	1	1.35		0.2391	0.5569	0.4907	0.6105	0.152	0.9683	0.6086	0.9145	0.1144	0.5212	0.8417	0.7865	0.0832	0.7608		1.1048	0.9749	0.9405	1.0092	1.1405	1.269	1.0119	1.0106		100	100	100	100	100	100
				X-23639	LC/MS pos early	49515								1.42685	1.33	1.54	1.06	0.91		0.8576	0.8165	0.0743	0.3522	0.9335	0.978	0.2047	0.785	0.1957	0.6016	0.8437	0.7865	0.9486	1		0.8476	1.0301	0.8857	1.1746	1.0269	0.8096	1.2442	1.2094		100	100	100	100	100	100
				X-23641	LC/MS pos late	49517								1.5542	1.38	1.7	1.49	1.22		0.2873	0.6034	0.0778	0.3522	0.6972	0.9717	0.3443	0.8394	0.1064	0.5212	0.277	0.6067	0.6467	0.955		0.6088	0.6543	0.5492	0.7593	0.9007	0.6683	1.1331	0.9462		50	57	50	67	81	50
				X-23644	LC/MS pos early	49521								1.00109	10.4	0.52	0.96	19.38		0.6506	0.7625	0.443	0.5945	0.0155	0.8182	0.0324	0.6452	0.1906	0.5994	0.1248	0.507	0.0516	0.7572		2.8515	1.5947	0.2798	2.9096	4.1114	5.4233	2.7995	2.8546		79	86	75	100	67	83
				X-23648	LC/MS pos early	49525								1.02486	0.96	1.09	1.09	0.96		0.7203	0.7761	0.863	0.7256	0.9576	0.978	0.9362	0.9453	0.8656	0.8434	0.7577	0.7662	0.8378	0.9953		1.5082	1.5092	1.5363	1.4822	1.5446	1.48	1.6092	1.5457		100	93	100	83	95	100
				X-23654	LC/MS pos early	49531								1.15661	1.05	1.26	1.26	1.06		0.2256	0.5436	0.2467	0.4943	0.5163	0.9683	0.7275	0.9215	0.1781	0.589	0.1656	0.5365	0.6999	0.9742		0.9846	0.9809	0.9559	1.006	1.1425	1.0133	1.2717	1.1388		100	100	100	100	100	100
				X-23655	LC/MS pos early	49532								0.721348	0.98	0.58	1.1	1.85		0.3048	0.6152	0.5022	0.615	0.6571	0.9683	0.878	0.9396	0.4044	0.7076	0.6584	0.7405	0.3247	0.8486		0.801	0.5568	0.5626	0.551	0.822	1.0394	0.6046	0.5778		36	29	38	17	43	33
				X-23659	LC/MS pos early	49536								1.10261	1.25	0.98	0.91	1.17		0.9191	0.8298	0.4703	0.6058	0.4262	0.9683	0.3104	0.8134	0.9552	0.8516	0.5006	0.6731	0.64	0.955		0.9746	1.0109	0.8982	1.1236	1.0383	1.051	1.0256	1.0746		93	100	100	100	95	83
				X-23662	LC/MS pos early	49539								1.08249	3.47	0.65	1.03	5.5		0.177	0.4979	0.5229	0.6198	0.9726	0.9807	0.6511	0.9164	0.6497	0.7814	0.3202	0.6143	0.3494	0.8621		1.3177	0.9055	0.4055	1.4056	1.8386	2.2299	1.4473	1.4264		43	36	50	17	57	33
				X-23665	LC/MS pos early	49542								0.31406	0.18	0.46	2.34	0.93		0.7534	0.7847	0.0074	0.1767	0.4029	0.9683	0.0182	0.6452	0.1398	0.5717	0.389	0.6317	0.724	0.985		2.0719	1.269	2.1487	0.3892	1.4537	1.9951	0.9122	0.6507		93	86	100	67	86	83
				X-23666	LC/MS pos early	49543								1.14552	1.05	1.24	1.21	1.02		0.6055	0.7434	0.2945	0.5185	0.4302	0.9683	0.859	0.9338	0.1717	0.5888	0.3295	0.6183	0.8535	0.9953		0.9401	0.9523	0.9287	0.9759	1.0647	0.9515	1.1779	1.0769		100	100	100	100	100	100
				X-23680	LC/MS pos late	49557								0.923934	0.76	1.13	1.19	0.79		0.9563	0.8346	0.6896	0.6763	0.417	0.9683	0.7803	0.9328	0.3651	0.6963	0.5152	0.6776	0.6104	0.955		1.0951	1.0739	1.2217	0.9261	1.033	0.9685	1.0975	1.0118		86	93	88	100	95	83
				X-23739	LC/MS pos early	49637								1.29196	1.4	1.19	0.88	1.04		0.8226	0.8082	0.0392	0.2939	0.3126	0.9683	0.0409	0.6452	0.4045	0.7076	0.3547	0.6317	0.5951	0.9439		0.8443	0.9933	0.8281	1.1586	0.9418	0.8604	1.0231	1.0908		100	100	100	100	100	100
				X-23780	LC/MS pos early	49679								1.61804	2.21	1.09	0.55	1.12		0.9029	0.8282	0.7379	0.6927	0.5971	0.9683	0.5629	0.9082	0.8839	0.8441	0.6257	0.73	0.7846	0.9875		0.8959	1.356	0.8442	1.8678	0.9895	0.9476	1.0315	1.4496		57	57	50	67	57	67
				X-23782	LC/MS pos late	49681								0.975765	1.33	0.72	0.74	1.37		0.519	0.722	0.9511	0.7446	0.0629	0.9683	0.2196	0.785	0.1454	0.5769	0.3455	0.6294	0.0932	0.7608		1.0976	1.0785	0.9274	1.2295	1.0901	1.2678	0.9124	1.071		100	100	100	100	100	100
				X-23786	LC/MS neg	49687								0.682251	0.69	0.68	1.36	1.4		0.0259	0.2868	0.0644	0.3396	0.7726	0.9752	0.2837	0.7934	0.1076	0.5212	0.1347	0.507	0.0875	0.7608		1.3561	0.9574	1.1322	0.7826	1.3239	1.5799	1.0679	0.9252		100	100	100	100	100	100
				X-23787	LC/MS neg	49688								0.689166	0.52	0.92	1.32	0.74		0.5306	0.7265	0.3106	0.5304	0.7882	0.9752	0.3892	0.8592	0.5729	0.7539	0.5022	0.6731	0.8091	0.9933		1.2267	1.0695	1.4113	0.7276	1.0027	1.0422	0.9632	0.8454		100	100	100	100	100	100
				X-24241	LC/MS pos early	52280								0.647484	0.71	0.6	0.96	1.14		0.7332	0.7808	0.1696	0.455	0.6293	0.9683	0.2134	0.785	0.496	0.7286	0.9149	0.8011	0.581	0.9369		1.2042	0.9609	1.1259	0.7959	1.023	1.2825	0.7635	0.7797		86	79	100	50	67	67
				X-24243	LC/MS pos early	52286								1.54789	1.76	1.46	2.09	2.52		0.0866	0.3823	0.4734	0.6063	0.5994	0.9683	0.4058	0.8592	0.8846	0.8441	0.3598	0.6317	0.1329	0.7608		1.0283	0.8071	0.5841	1.03	1.813	1.4726	2.1534	1.5917		86	79	75	83	86	100
				X-24295	LC/MS neg	52483								1.53454	1.05	1.91	2.36	1.3		0.0528	0.333	0.6628	0.6683	0.4073	0.9683	0.7903	0.9331	0.3443	0.6963	0.0403	0.4259	0.4371	0.8882		1.0424	0.9297	0.9073	0.9521	1.7124	1.1775	2.2472	1.5996		100	100	100	100	100	100
				X-24328	LC/MS neg	52524								1.37629	0.98	1.68	2.21	1.3		0.007	0.2103	0.249	0.4962	0.4189	0.9683	0.813	0.9333	0.1449	0.5766	0.0091	0.2742	0.1746	0.7608		0.814	0.7032	0.7093	0.6971	1.2312	0.9187	1.5436	1.1203		79	79	63	100	100	100
				X-24337	LC/MS neg	52533								1.27194	1.04	1.49	1.53	1.06		0.4733	0.7033	0.1253	0.4204	0.2373	0.9683	0.8054	0.9333	0.0453	0.4259	0.1576	0.5365	0.75	0.9875		0.9333	0.9225	0.9055	0.9395	1.1979	0.9611	1.4348	1.1871		93	93	100	83	95	83
				X-24339	LC/MS neg	52535								1.36645	1.17	1.55	1.47	1.11		0.3792	0.6567	0.4621	0.6008	0.6315	0.9683	0.8626	0.9338	0.3638	0.6963	0.3098	0.6121	0.7862	0.9875		0.7166	0.7372	0.6805	0.7939	0.9586	0.7527	1.1645	0.9792		64	50	63	33	71	67
				X-24344	LC/MS neg	52540								0.768667	0.82	0.74	1.84	2.03		0.0221	0.2868	0.574	0.6316	0.9782	0.9807	0.7193	0.9215	0.6582	0.7834	0.0838	0.5007	0.1122	0.7608		0.983	0.5904	0.6496	0.5312	1.1482	1.3165	0.9799	0.7556		50	36	38	33	76	67
				X-24352	LC/MS neg	52548								1.0368	0.57	1.87	1.84	0.56		0.7345	0.7808	0.9019	0.7394	0.226	0.9683	0.4617	0.8715	0.3158	0.6781	0.2457	0.5865	0.5535	0.9292		0.6494	0.6537	0.8334	0.4741	0.669	0.4655	0.8724	0.6733		50	43	50	33	52	50
				X-24408	LC/MS pos early	52637								0.830835	0.78	0.86	1.61	1.46		0.0059	0.1975	0.2834	0.5113	0.9487	0.978	0.496	0.8737	0.3924	0.7023	0.0378	0.4189	0.0512	0.7572		1.1941	0.8656	0.9704	0.7607	1.3206	1.4178	1.2234	0.9921		100	100	100	100	100	100
				X-24410	LC/MS pos early	52639								1.649	1.61	1.67	1.9	1.83		0.0604	0.3419	0.4677	0.6053	0.5572	0.9683	0.3796	0.8577	0.916	0.8491	0.3171	0.6143	0.0981	0.7608		1.0356	0.9549	0.7322	1.1776	1.7885	1.3391	2.2378	1.7077		79	64	63	67	100	100
				X-24411	LC/MS pos early	52640								0.997285	0.91	1.07	1.47	1.24		0.1217	0.4398	0.985	0.7502	0.8975	0.9776	0.9212	0.9453	0.9342	0.8506	0.2063	0.5585	0.3345	0.8563		1.1416	0.9713	1.0191	0.9236	1.3088	1.264	1.3535	1.1385		79	64	63	67	95	100
				X-24418	LC/MS neg	52647								1.28901	1.4	1.18	0.87	1.03		0.5316	0.7265	0.203	0.4716	0.3132	0.9683	0.1289	0.7227	0.8378	0.8351	0.223	0.5742	0.794	0.9875		0.9875	1.1685	0.9726	1.3644	1.0918	1.0023	1.1814	1.2729		93	100	100	100	90	83
				X-24422	LC/MS pos early	52636								1.64651	1.39	1.84	1.76	1.33		0.4104	0.6679	0.7742	0.6979	0.8481	0.9757	0.7483	0.9224	0.9429	0.8511	0.6339	0.7324	0.4957	0.9029		1.1941	1.2267	1.027	1.4264	1.9335	1.3613	2.5058	1.9661		100	100	100	100	95	100
				X-24431	LC/MS pos early	52661								0.565959	0.54	0.61	0.69	0.6		0.4635	0.697	0.2204	0.4808	0.6857	0.9717	0.2742	0.7934	0.5323	0.7407	0.804	0.7794	0.4459	0.8925		0.8619	0.8283	1.0778	0.5787	0.5214	0.646	0.3968	0.4878		64	64	75	50	52	50
				X-24473	LC/MS pos early	52790								1.41428	4.86	0.73	0.76	5.04		0.2415	0.5594	0.0388	0.2939	0.0074	0.8182	0.002	0.5575	0.5992	0.7611	0.2192	0.5717	0.0105	0.6553		1.3288	1.2901	0.4403	2.1399	1.918	2.2172	1.6187	1.8793		79	86	75	100	95	83
				X-24475	LC/MS pos early	52792								1.77066	4.11	0.47	0.2	1.8		0.0614	0.3419	0.6631	0.6683	0.0266	0.8525	0.0729	0.666	0.1668	0.5888	0.0032	0.2261	0.797	0.989		1.2636	2.3117	0.9039	3.7195	1.1894	1.6234	0.7553	2.2374		93	100	100	100	62	83
				X-24494	LC/MS neg	52813								0.682063	0.88	0.56	1.03	1.62		0.4523	0.6951	0.0767	0.3522	0.4871	0.9683	0.455	0.8701	0.0666	0.4655	0.9657	0.811	0.3335	0.8563		1.2622	0.9053	0.9641	0.8465	1.2177	1.5603	0.8752	0.8609		93	86	100	67	81	83
[truncated: 74 more rows]
[truncated: 6 more columns]
