# Supplementary material for: The gut microbiota modulates the rate of ALS progression
Source: Research Square preprint supplement (doi:10.21203/rs.3.rs-6370840/v1), 2025-04-17
Supplement: Supplementary file 5 [file a15d1439de7b1907cc9607c9.xlsx]

## Sheet: sig reactions
Extended data Table 4. Changes in Metacyc reactions identified by humann in slow versus fast progression donors.
feature	metadata	value	coef	stderr	N	N.not.0	pval	qval
X3.4.24.15.RXN...expasy..Thimet.oligopeptidase..3.4.24.15.	prog	fast	1.17202	0.0956262	6	3	0.000254495	0.211203
ACETOACETATE..COA.LIGASE.RXN...expasy..Acetoacetate..CoA.ligase..6.2.1.16.	prog	fast	-2.0707	0.158412	6	6	0.000197731	0.211203
ADDALT.RXN...expasy..Adenosine.deaminase..3.5.4.4.	prog	fast	2.28347	0.340073	6	6	0.00256108	0.211203
ADENODEAMIN.RXN...expasy..Adenosine.deaminase..3.5.4.4.	prog	fast	2.28347	0.340073	6	6	0.00256108	0.211203
AIRCARBOXY.RXN...expasy..Phosphoribosylaminoimidazole.carboxylase..4.1.1.21.	prog	fast	4.55861	0.421006	6	6	0.00041274	0.211203
ARGININE.DEIMINASE.RXN...expasy..Arginine.deiminase..3.5.3.6.	prog	fast	1.64867	0.152767	6	6	0.000418098	0.211203
FATTY.ACYL.COA.SYNTHASE.RXN...expasy..Fatty.acyl.CoA.synthase.system..2.3.1.86.	prog	fast	-2.34933	0.377515	6	6	0.00339484	0.211203
HYALURONATE.LYASE.RXN...expasy..Hyaluronate.lyase..4.2.2.1.	prog	fast	3.48056	0.392364	6	4	0.000892043	0.211203
NADPH.DEHYDROGENASE.FLAVIN.RXN...expasy..Flavin.reductase..NADPH...1.5.1.30.	prog	fast	5.14323	0.334984	6	4	0.000104984	0.211203
NADPH.DEHYDROGENASE.RXN...expasy..NADPH.dehydrogenase..1.6.99.1.	prog	fast	-2.72717	0.378659	6	6	0.00196989	0.211203
NICOTINAMID.RXN...expasy..Nicotinamidase..3.5.1.19.	prog	fast	4.31378	0.514641	6	6	0.00110819	0.211203
RXN.10059...expasy..Fatty.acyl.CoA.synthase.system..2.3.1.86.	prog	fast	-2.34933	0.377515	6	6	0.00339484	0.211203
RXN.10060...expasy..Fatty.acyl.CoA.synthase.system..2.3.1.86.	prog	fast	-2.34933	0.377515	6	6	0.00339484	0.211203
RXN.10061...metacyc..3.hydroxycerotyl..acp..dehydrase..2.3.1.86.	prog	fast	-2.34933	0.377515	6	6	0.00339484	0.211203
RXN.10062...metacyc..trans.hexacos.2.enoyl..acp..reductase..2.3.1.86.	prog	fast	-2.34933	0.377515	6	6	0.00339484	0.211203
RXN.20769...expasy..Fatty.acyl.CoA.synthase.system..2.3.1.86.	prog	fast	-2.34933	0.377515	6	6	0.00339484	0.211203
RXN.20770...expasy..Fatty.acyl.CoA.synthase.system..2.3.1.86.	prog	fast	-2.34933	0.377515	6	6	0.00339484	0.211203
RXN.21719...expasy..Fatty.acyl.CoA.synthase.system..2.3.1.86.	prog	fast	-2.34933	0.377515	6	6	0.00339484	0.211203
RXN.21720...expasy..Fatty.acyl.CoA.synthase.system..2.3.1.86.	prog	fast	-2.34933	0.377515	6	6	0.00339484	0.211203
RXN.21721...expasy..Fatty.acyl.CoA.synthase.system..2.3.1.86.	prog	fast	-2.34933	0.377515	6	6	0.00339484	0.211203
RXN.21722...expasy..Fatty.acyl.CoA.synthase.system..2.3.1.86.	prog	fast	-2.34933	0.377515	6	6	0.00339484	0.211203
RXN.21723...expasy..Fatty.acyl.CoA.synthase.system..2.3.1.86.	prog	fast	-2.34933	0.377515	6	6	0.00339484	0.211203
RXN.21724...expasy..Fatty.acyl.CoA.synthase.system..2.3.1.86.	prog	fast	-2.34933	0.377515	6	6	0.00339484	0.211203
RXN.21725...expasy..Fatty.acyl.CoA.synthase.system..2.3.1.86.	prog	fast	-2.34933	0.377515	6	6	0.00339484	0.211203
RXN.21726...expasy..Fatty.acyl.CoA.synthase.system..2.3.1.86.	prog	fast	-2.34933	0.377515	6	6	0.00339484	0.211203
RXN.9407...expasy..Limonene.1.2.monooxygenase..1.14.13.107.	prog	fast	5.25927	0.713591	6	4	0.0018061	0.211203
RXN.9408...expasy..Limonene.1.2.monooxygenase..1.14.13.107.	prog	fast	5.25927	0.713591	6	4	0.0018061	0.211203
RXN.9409...expasy..Limonene.1.2.monooxygenase..1.14.13.107.	prog	fast	5.25927	0.713591	6	4	0.0018061	0.211203
RXN1G.499...metacyc..3.oxo.lignoceroyl..acyl.carrier.protein..synthase..2.3.1.86.	prog	fast	-2.34933	0.377515	6	6	0.00339484	0.211203
RXN1G.508...metacyc..3.oxo.lignoceroyl..acyl.carrier.protein..reductase..2.3.1.86.	prog	fast	-2.34933	0.377515	6	6	0.00339484	0.211203
RXN1G.517...expasy..Fatty.acyl.CoA.synthase.system..2.3.1.86.	prog	fast	-2.34933	0.377515	6	6	0.00339484	0.211203
RXN1G.526...metacyc..trans.tetracos.2.enoyl..acyl.carrier.protein..reductase..2.3.1.86.	prog	fast	-2.34933	0.377515	6	6	0.00339484	0.211203
RXN1G.536...metacyc..cerotoyl..acyl.carrier.protein..reductase..2.3.1.86.	prog	fast	-2.34933	0.377515	6	6	0.00339484	0.211203
RXN3O.1803...expasy..Fatty.acyl.CoA.synthase.system..2.3.1.86.	prog	fast	-2.34933	0.377515	6	6	0.00339484	0.211203
RXN3O.5293...expasy..Fatty.acyl.CoA.synthase.system..2.3.1.86.	prog	fast	-2.34933	0.377515	6	6	0.00339484	0.211203
RXN3O.5304...expasy..Fatty.acyl.CoA.synthase.system..2.3.1.86.	prog	fast	-2.34933	0.377515	6	6	0.00339484	0.211203
RXN66.610...expasy..AMBIGUOUS..2.3.1.85..2.3.1.86.	prog	fast	-2.34933	0.377515	6	6	0.00339484	0.211203
RXN66.614...expasy..AMBIGUOUS..2.3.1.85..2.3.1.86.	prog	fast	-2.34933	0.377515	6	6	0.00339484	0.211203
RXN66.616...expasy..AMBIGUOUS..2.3.1.85..2.3.1.86.	prog	fast	-2.34933	0.377515	6	6	0.00339484	0.211203
RXN66.618...expasy..AMBIGUOUS..2.3.1.85..2.3.1.86.	prog	fast	-2.34933	0.377515	6	6	0.00339484	0.211203
RXN66.619...expasy..AMBIGUOUS..2.3.1.85..2.3.1.86.	prog	fast	-2.34933	0.377515	6	6	0.00339484	0.211203
RXN66.620...expasy..AMBIGUOUS..2.3.1.85..2.3.1.86.	prog	fast	-2.34933	0.377515	6	6	0.00339484	0.211203
RXN66.622...expasy..AMBIGUOUS..2.3.1.85..2.3.1.86.	prog	fast	-2.34933	0.377515	6	6	0.00339484	0.211203
RXN66.623...expasy..AMBIGUOUS..2.3.1.85..2.3.1.86.	prog	fast	-2.34933	0.377515	6	6	0.00339484	0.211203
RXN66.624...expasy..AMBIGUOUS..2.3.1.85..2.3.1.86.	prog	fast	-2.34933	0.377515	6	6	0.00339484	0.211203
RXN66.626...expasy..AMBIGUOUS..2.3.1.85..2.3.1.86.	prog	fast	-2.34933	0.377515	6	6	0.00339484	0.211203
RXN66.627...expasy..AMBIGUOUS..2.3.1.85..2.3.1.86.	prog	fast	-2.34933	0.377515	6	6	0.00339484	0.211203
RXN66.628...expasy..AMBIGUOUS..2.3.1.85..2.3.1.86.	prog	fast	-2.34933	0.377515	6	6	0.00339484	0.211203
RXN66.630...expasy..AMBIGUOUS..2.3.1.85..2.3.1.86.	prog	fast	-2.34933	0.377515	6	6	0.00339484	0.211203
RXN66.631...expasy..AMBIGUOUS..2.3.1.85..2.3.1.86.	prog	fast	-2.34933	0.377515	6	6	0.00339484	0.211203
RXN66.632...expasy..AMBIGUOUS..2.3.1.85..2.3.1.86.	prog	fast	-2.34933	0.377515	6	6	0.00339484	0.211203
RXN66.635...expasy..AMBIGUOUS..2.3.1.85..2.3.1.86.	prog	fast	-2.34933	0.377515	6	6	0.00339484	0.211203
RXN66.636...expasy..AMBIGUOUS..2.3.1.85..2.3.1.86.	prog	fast	-2.34933	0.377515	6	6	0.00339484	0.211203
RXN66.637...expasy..AMBIGUOUS..2.3.1.85..2.3.1.86.	prog	fast	-2.34933	0.377515	6	6	0.00339484	0.211203
RXN66.639...expasy..AMBIGUOUS..2.3.1.85..2.3.1.86.	prog	fast	-2.34933	0.377515	6	6	0.00339484	0.211203
RXN66.640...expasy..AMBIGUOUS..2.3.1.85..2.3.1.86.	prog	fast	-2.34933	0.377515	6	6	0.00339484	0.211203
RXN66.641...expasy..AMBIGUOUS..2.3.1.85..2.3.1.86.	prog	fast	-2.34933	0.377515	6	6	0.00339484	0.211203
RXN66.642...expasy..AMBIGUOUS..2.3.1.85..2.3.1.86.	prog	fast	-2.34933	0.377515	6	6	0.00339484	0.211203
RXN66.645...expasy..AMBIGUOUS..2.3.1.85..2.3.1.86.	prog	fast	-2.34933	0.377515	6	6	0.00339484	0.211203
RXN66.646...expasy..AMBIGUOUS..2.3.1.85..2.3.1.86.	prog	fast	-2.34933	0.377515	6	6	0.00339484	0.211203
RXN66.648...expasy..AMBIGUOUS..2.3.1.85..2.3.1.86.	prog	fast	-2.34933	0.377515	6	6	0.00339484	0.211203
ASPARTATE.RACEMASE.RXN...expasy..Aspartate.racemase..5.1.1.13.	prog	fast	1.66482	0.271619	6	6	0.00359028	0.21976
X2.1.1.86.RXN...expasy..Tetrahydromethanopterin.S.methyltransferase..2.1.1.86.	prog	fast	8.94997	1.47026	6	4	0.00368197	0.221795
X2.7.7.1.RXN...expasy..Nicotinamide.nucleotide.adenylyltransferase..2.7.7.1.	prog	fast	5.97973	0.987057	6	5	0.00374759	0.222221

## Sheet: sig reactions per donor
# Gene Family	PALS02_Abundance-RPKs	PALS09_Abundance-RPKs	PALS10_Abundance-RPKs	PALS26_Abundance-RPKs	PALS27_Abundance-RPKs	PALS29_Abundance-RPKs	Maaslin Q val <0.25
2.1.1.86-RXN: (expasy) Tetrahydromethanopterin S-methyltransferase [2.1.1.86]	3.89212e-08	0	0	1.99154e-05	4.99919e-05	1.79076e-06	yes
2.7.7.1-RXN: (expasy) Nicotinamide-nucleotide adenylyltransferase [2.7.7.1]	3.85489e-07	7.68131e-08	0	6.98992e-06	6.63639e-06	6.16151e-06	yes
3.4.24.15-RXN: (expasy) Thimet oligopeptidase [3.4.24.15]	0	0	0	1.94629e-07	1.5479e-07	1.76048e-07	yes
ACETOACETATE--COA-LIGASE-RXN: (expasy) Acetoacetate--CoA ligase [6.2.1.16]	8.19481e-06	6.62411e-06	7.53358e-06	1.53837e-06	2.09585e-06	1.71089e-06	yes
ADDALT-RXN: (expasy) Adenosine deaminase [3.5.4.4]	3.69466e-06	5.0339e-06	2.85002e-06	1.35385e-05	1.86031e-05	2.42856e-05	yes
ADENODEAMIN-RXN: (expasy) Adenosine deaminase [3.5.4.4]	3.69466e-06	5.0339e-06	2.85002e-06	1.35385e-05	1.86031e-05	2.42856e-05	yes
AIRCARBOXY-RXN: (expasy) Phosphoribosylaminoimidazole carboxylase [4.1.1.21]	4.33759e-07	6.22935e-07	4.05992e-07	1.03169e-05	7.57339e-06	1.8374e-05	yes
ARGININE-DEIMINASE-RXN: (expasy) Arginine deiminase [3.5.3.6]	1.61201e-05	1.4512e-05	1.45762e-05	4.45325e-05	5.73593e-05	4.11488e-05	yes
ASPARTATE-RACEMASE-RXN: (expasy) Aspartate racemase [5.1.1.13]	7.83336e-06	4.61454e-06	4.40697e-06	1.65375e-05	1.65812e-05	1.85188e-05	yes
FATTY-ACYL-COA-SYNTHASE-RXN: (expasy) Fatty-acyl-CoA synthase system [2.3.1.86]	1.46276e-05	6.62411e-06	7.53358e-06	1.53837e-06	2.09585e-06	1.71089e-06	yes
HYALURONATE-LYASE-RXN: (expasy) Hyaluronate lyase [4.2.2.1]	1.13425e-07	0	0	8.70532e-07	9.67261e-07	6.02555e-07	yes
NADPH-DEHYDROGENASE-FLAVIN-RXN: (expasy) Flavin reductase (NADPH) [1.5.1.30]	1.28389e-07	0	0	2.75983e-06	2.83458e-06	2.98504e-06	yes
NADPH-DEHYDROGENASE-RXN: (expasy) NADPH dehydrogenase [1.6.99.1]	2.12705e-05	1.17172e-05	1.08409e-05	1.94952e-06	2.82689e-06	1.6887e-06	yes
NICOTINAMID-RXN: (expasy) Nicotinamidase [3.5.1.19]	9.28542e-07	1.37157e-06	4.48395e-07	1.32485e-05	1.57897e-05	2.1472e-05	yes
RXN-10059: (expasy) Fatty-acyl-CoA synthase system [2.3.1.86]	1.46276e-05	6.62411e-06	7.53358e-06	1.53837e-06	2.09585e-06	1.71089e-06	yes
RXN-10060: (expasy) Fatty-acyl-CoA synthase system [2.3.1.86]	1.46276e-05	6.62411e-06	7.53358e-06	1.53837e-06	2.09585e-06	1.71089e-06	yes
RXN-10061: (metacyc) 3-hydroxycerotyl-[acp] dehydrase [2.3.1.86]	1.46276e-05	6.62411e-06	7.53358e-06	1.53837e-06	2.09585e-06	1.71089e-06	yes
RXN-10062: (metacyc) trans-hexacos-2-enoyl-[acp] reductase [2.3.1.86]	1.46276e-05	6.62411e-06	7.53358e-06	1.53837e-06	2.09585e-06	1.71089e-06	yes
RXN-20769: (expasy) Fatty-acyl-CoA synthase system [2.3.1.86]	1.46276e-05	6.62411e-06	7.53358e-06	1.53837e-06	2.09585e-06	1.71089e-06	yes
RXN-20770: (expasy) Fatty-acyl-CoA synthase system [2.3.1.86]	1.46276e-05	6.62411e-06	7.53358e-06	1.53837e-06	2.09585e-06	1.71089e-06	yes
RXN-21719: (expasy) Fatty-acyl-CoA synthase system [2.3.1.86]	1.46276e-05	6.62411e-06	7.53358e-06	1.53837e-06	2.09585e-06	1.71089e-06	yes
RXN-21720: (expasy) Fatty-acyl-CoA synthase system [2.3.1.86]	1.46276e-05	6.62411e-06	7.53358e-06	1.53837e-06	2.09585e-06	1.71089e-06	yes
RXN-21721: (expasy) Fatty-acyl-CoA synthase system [2.3.1.86]	1.46276e-05	6.62411e-06	7.53358e-06	1.53837e-06	2.09585e-06	1.71089e-06	yes
RXN-21722: (expasy) Fatty-acyl-CoA synthase system [2.3.1.86]	1.46276e-05	6.62411e-06	7.53358e-06	1.53837e-06	2.09585e-06	1.71089e-06	yes
RXN-21723: (expasy) Fatty-acyl-CoA synthase system [2.3.1.86]	1.46276e-05	6.62411e-06	7.53358e-06	1.53837e-06	2.09585e-06	1.71089e-06	yes
RXN-21724: (expasy) Fatty-acyl-CoA synthase system [2.3.1.86]	1.46276e-05	6.62411e-06	7.53358e-06	1.53837e-06	2.09585e-06	1.71089e-06	yes
RXN-21725: (expasy) Fatty-acyl-CoA synthase system [2.3.1.86]	1.46276e-05	6.62411e-06	7.53358e-06	1.53837e-06	2.09585e-06	1.71089e-06	yes
RXN-21726: (expasy) Fatty-acyl-CoA synthase system [2.3.1.86]	1.46276e-05	6.62411e-06	7.53358e-06	1.53837e-06	2.09585e-06	1.71089e-06	yes
RXN-9407: (expasy) Limonene 1,2-monooxygenase [1.14.13.107]	2.04291e-07	0	0	2.25704e-06	5.17969e-06	1.02432e-05	yes
RXN-9408: (expasy) Limonene 1,2-monooxygenase [1.14.13.107]	2.04291e-07	0	0	2.25704e-06	5.17969e-06	1.02432e-05	yes
RXN-9409: (expasy) Limonene 1,2-monooxygenase [1.14.13.107]	2.04291e-07	0	0	2.25704e-06	5.17969e-06	1.02432e-05	yes
RXN1G-499: (metacyc) 3-oxo-lignoceroyl-[acyl-carrier protein] synthase [2.3.1.86]	1.46276e-05	6.62411e-06	7.53358e-06	1.53837e-06	2.09585e-06	1.71089e-06	yes
RXN1G-508: (metacyc) 3-oxo-lignoceroyl-[acyl-carrier protein] reductase [2.3.1.86]	1.46276e-05	6.62411e-06	7.53358e-06	1.53837e-06	2.09585e-06	1.71089e-06	yes
RXN1G-517: (expasy) Fatty-acyl-CoA synthase system [2.3.1.86]	1.46276e-05	6.62411e-06	7.53358e-06	1.53837e-06	2.09585e-06	1.71089e-06	yes
RXN1G-526: (metacyc) trans-tetracos-2-enoyl-[acyl-carrier protein] reductase [2.3.1.86]	1.46276e-05	6.62411e-06	7.53358e-06	1.53837e-06	2.09585e-06	1.71089e-06	yes
RXN1G-536: (metacyc) cerotoyl-[acyl-carrier protein] reductase [2.3.1.86]	1.46276e-05	6.62411e-06	7.53358e-06	1.53837e-06	2.09585e-06	1.71089e-06	yes
RXN3O-1803: (expasy) Fatty-acyl-CoA synthase system [2.3.1.86]	1.46276e-05	6.62411e-06	7.53358e-06	1.53837e-06	2.09585e-06	1.71089e-06	yes
RXN3O-5293: (expasy) Fatty-acyl-CoA synthase system [2.3.1.86]	1.46276e-05	6.62411e-06	7.53358e-06	1.53837e-06	2.09585e-06	1.71089e-06	yes
RXN3O-5304: (expasy) Fatty-acyl-CoA synthase system [2.3.1.86]	1.46276e-05	6.62411e-06	7.53358e-06	1.53837e-06	2.09585e-06	1.71089e-06	yes
RXN66-610: (expasy) AMBIGUOUS [2.3.1.85; 2.3.1.86]	1.46276e-05	6.62411e-06	7.53358e-06	1.53837e-06	2.09585e-06	1.71089e-06	yes
RXN66-614: (expasy) AMBIGUOUS [2.3.1.85; 2.3.1.86]	1.46276e-05	6.62411e-06	7.53358e-06	1.53837e-06	2.09585e-06	1.71089e-06	yes
RXN66-616: (expasy) AMBIGUOUS [2.3.1.85; 2.3.1.86]	1.46276e-05	6.62411e-06	7.53358e-06	1.53837e-06	2.09585e-06	1.71089e-06	yes
RXN66-618: (expasy) AMBIGUOUS [2.3.1.85; 2.3.1.86]	1.46276e-05	6.62411e-06	7.53358e-06	1.53837e-06	2.09585e-06	1.71089e-06	yes
RXN66-619: (expasy) AMBIGUOUS [2.3.1.85; 2.3.1.86]	1.46276e-05	6.62411e-06	7.53358e-06	1.53837e-06	2.09585e-06	1.71089e-06	yes
RXN66-620: (expasy) AMBIGUOUS [2.3.1.85; 2.3.1.86]	1.46276e-05	6.62411e-06	7.53358e-06	1.53837e-06	2.09585e-06	1.71089e-06	yes
RXN66-622: (expasy) AMBIGUOUS [2.3.1.85; 2.3.1.86]	1.46276e-05	6.62411e-06	7.53358e-06	1.53837e-06	2.09585e-06	1.71089e-06	yes
RXN66-623: (expasy) AMBIGUOUS [2.3.1.85; 2.3.1.86]	1.46276e-05	6.62411e-06	7.53358e-06	1.53837e-06	2.09585e-06	1.71089e-06	yes
RXN66-624: (expasy) AMBIGUOUS [2.3.1.85; 2.3.1.86]	1.46276e-05	6.62411e-06	7.53358e-06	1.53837e-06	2.09585e-06	1.71089e-06	yes
RXN66-626: (expasy) AMBIGUOUS [2.3.1.85; 2.3.1.86]	1.46276e-05	6.62411e-06	7.53358e-06	1.53837e-06	2.09585e-06	1.71089e-06	yes
RXN66-627: (expasy) AMBIGUOUS [2.3.1.85; 2.3.1.86]	1.46276e-05	6.62411e-06	7.53358e-06	1.53837e-06	2.09585e-06	1.71089e-06	yes
RXN66-628: (expasy) AMBIGUOUS [2.3.1.85; 2.3.1.86]	1.46276e-05	6.62411e-06	7.53358e-06	1.53837e-06	2.09585e-06	1.71089e-06	yes
RXN66-630: (expasy) AMBIGUOUS [2.3.1.85; 2.3.1.86]	1.46276e-05	6.62411e-06	7.53358e-06	1.53837e-06	2.09585e-06	1.71089e-06	yes
RXN66-631: (expasy) AMBIGUOUS [2.3.1.85; 2.3.1.86]	1.46276e-05	6.62411e-06	7.53358e-06	1.53837e-06	2.09585e-06	1.71089e-06	yes
RXN66-632: (expasy) AMBIGUOUS [2.3.1.85; 2.3.1.86]	1.46276e-05	6.62411e-06	7.53358e-06	1.53837e-06	2.09585e-06	1.71089e-06	yes
RXN66-635: (expasy) AMBIGUOUS [2.3.1.85; 2.3.1.86]	1.46276e-05	6.62411e-06	7.53358e-06	1.53837e-06	2.09585e-06	1.71089e-06	yes
RXN66-636: (expasy) AMBIGUOUS [2.3.1.85; 2.3.1.86]	1.46276e-05	6.62411e-06	7.53358e-06	1.53837e-06	2.09585e-06	1.71089e-06	yes
RXN66-637: (expasy) AMBIGUOUS [2.3.1.85; 2.3.1.86]	1.46276e-05	6.62411e-06	7.53358e-06	1.53837e-06	2.09585e-06	1.71089e-06	yes
RXN66-639: (expasy) AMBIGUOUS [2.3.1.85; 2.3.1.86]	1.46276e-05	6.62411e-06	7.53358e-06	1.53837e-06	2.09585e-06	1.71089e-06	yes
RXN66-640: (expasy) AMBIGUOUS [2.3.1.85; 2.3.1.86]	1.46276e-05	6.62411e-06	7.53358e-06	1.53837e-06	2.09585e-06	1.71089e-06	yes
RXN66-641: (expasy) AMBIGUOUS [2.3.1.85; 2.3.1.86]	1.46276e-05	6.62411e-06	7.53358e-06	1.53837e-06	2.09585e-06	1.71089e-06	yes
RXN66-642: (expasy) AMBIGUOUS [2.3.1.85; 2.3.1.86]	1.46276e-05	6.62411e-06	7.53358e-06	1.53837e-06	2.09585e-06	1.71089e-06	yes
RXN66-645: (expasy) AMBIGUOUS [2.3.1.85; 2.3.1.86]	1.46276e-05	6.62411e-06	7.53358e-06	1.53837e-06	2.09585e-06	1.71089e-06	yes
RXN66-646: (expasy) AMBIGUOUS [2.3.1.85; 2.3.1.86]	1.46276e-05	6.62411e-06	7.53358e-06	1.53837e-06	2.09585e-06	1.71089e-06	yes
RXN66-648: (expasy) AMBIGUOUS [2.3.1.85; 2.3.1.86]	1.46276e-05	6.62411e-06	7.53358e-06	1.53837e-06	2.09585e-06	1.71089e-06	yes

## Sheet: all reactions per donor
# Gene Family	PALS02_Abundance-RPKs	PALS09_Abundance-RPKs	PALS10_Abundance-RPKs	PALS26_Abundance-RPKs	PALS27_Abundance-RPKs	PALS29_Abundance-RPKs	Maaslin Q val <0.25
UNMAPPED	0.177185	0.178317	0.171335	0.219449	0.210716	0.159045	no
UNGROUPED	0.728868	0.72166	0.738553	0.690986	0.695133	0.733104	no
--LIMONENE-6-MONOOXYGENASE-RXN: (expasy) (S)-limonene 6-monooxygenase [1.14.14.51]	3.82065e-08	0	0	0	0	1.2836e-06	no
1-ACYLGLYCEROL-3-P-ACYLTRANSFER-RXN: (expasy) 1-acylglycerol-3-phosphate O-acyltransferase [2.3.1.51]	0.000208554	0.000291376	0.000258666	0.000192439	0.00022854	0.000264608	no
1.1.1.127-RXN: (expasy) 2-dehydro-3-deoxy-D-gluconate 5-dehydrogenase [1.1.1.127]	1.79404e-06	1.76649e-05	2.76576e-06	2.01012e-06	1.36097e-05	6.30541e-05	no
1.1.1.136-RXN: (expasy) UDP-N-acetylglucosamine 6-dehydrogenase [1.1.1.136]	0	3.43805e-06	4.21424e-06	1.22585e-07	9.00346e-07	1.57737e-06	no
1.1.1.176-RXN: (expasy) 12-alpha-hydroxysteroid dehydrogenase [1.1.1.176]	0	0	3.27411e-07	3.06284e-07	2.45254e-06	6.62401e-07	no
1.1.1.188-RXN: (expasy) Prostaglandin-F synthase [1.1.1.188]	0	0	0	0	0	1.78178e-07	no
1.1.1.201-RXN: (expasy) 7-beta-hydroxysteroid dehydrogenase (NADP(+)) [1.1.1.201]	9.59004e-07	8.748e-07	0	0	4.05734e-06	9.34689e-06	no
1.1.1.210-RXN: (expasy) 3-beta-(or 20-alpha)-hydroxysteroid dehydrogenase [1.1.1.210]	0	0	0	0	8.56258e-08	0	no
1.1.1.215-RXN: (expasy) Gluconate 2-dehydrogenase [1.1.1.215]	0	0	0	0	0	0	no
1.1.1.222-RXN: (expasy) Hydroxyphenylpyruvate reductase [1.1.1.237]	3.39669e-08	0	0	0	0	7.00996e-07	no
1.1.1.251-RXN: (expasy) Galactitol-1-phosphate 5-dehydrogenase [1.1.1.251]	1.05926e-07	1.21345e-05	0	8.76203e-07	8.84242e-08	1.87067e-05	no
1.1.1.255-RXN: (expasy) Mannitol dehydrogenase [1.1.1.255]	0	0	0	0	0	0	no
1.1.1.261-RXN: (expasy) sn-glycerol-1-phosphate dehydrogenase [1.1.1.261]	4.3324e-05	5.38971e-05	3.68185e-05	1.42389e-05	5.82541e-05	3.13439e-05	no
1.1.1.264-RXN: (expasy) L-idonate 5-dehydrogenase (NAD(P)(+)) [1.1.1.264]	1.17247e-07	0	2.15082e-07	1.42959e-07	4.66755e-08	1.31491e-06	no
1.1.1.266-RXN: (expasy) dTDP-4-dehydro-6-deoxyglucose reductase [1.1.1.266]	4.44694e-07	3.06114e-07	2.51102e-06	0	7.58682e-07	8.64497e-07	no
1.1.1.268-RXN: (expasy) 2-(R)-hydroxypropyl-CoM dehydrogenase [1.1.1.268]	5.02295e-06	2.02581e-06	1.85669e-06	8.09423e-07	1.26457e-06	1.54017e-06	no
1.1.1.271-RXN: (expasy) GDP-L-fucose synthase [1.1.1.271]	3.9926e-05	6.70664e-05	6.10195e-05	2.72618e-05	6.74644e-05	6.13913e-05	no
1.1.1.272-RXN: (expasy) D-2-hydroxyacid dehydrogenase (NADP(+)) [1.1.1.272]	3.5337e-07	1.82511e-07	1.14013e-06	1.52936e-06	0	1.15121e-07	no
1.1.1.274-RXN: (expasy) 2,5-didehydrogluconate reductase (2-dehydro-D-gluconate-forming) [1.1.1.274]	6.46144e-05	3.16222e-05	1.42361e-05	9.38546e-06	1.98796e-05	7.3687e-05	no
1.1.1.283-RXN: (expasy) Methylglyoxal reductase (NADPH) [1.1.1.283]	1.25701e-05	1.12538e-06	1.07661e-07	8.45142e-07	1.62424e-05	3.12511e-07	no
1.1.1.289-RXN: (expasy) Sorbose reductase [1.1.1.289]	0	1.12323e-06	7.26503e-07	2.7262e-06	0	0	no
1.1.1.291-RXN: (expasy) 2-hydroxymethylglutarate dehydrogenase [1.1.1.291]	1.12852e-07	0	7.89128e-08	5.15646e-08	3.78258e-07	7.86669e-06	no
1.1.1.292-RXN: (expasy) 1,5-anhydro-D-fructose reductase (1,5-anhydro-D-mannitol-forming) [1.1.1.292]	4.20069e-05	0.000119656	0.000122777	0.000128467	4.94516e-05	7.65769e-05	no
1.1.1.34-RXN: (expasy) Hydroxymethylglutaryl-CoA reductase (NADPH) [1.1.1.34]	0	0	0	7.83169e-06	7.61764e-06	0	no
1.1.1.39-RXN: (expasy) Malate dehydrogenase (oxaloacetate-decarboxylating) [1.1.1.38]	2.83011e-06	4.16406e-06	3.25922e-06	5.96708e-06	2.09785e-05	3.22887e-05	no
1.1.1.51-RXN: (expasy) 3(or 17)-beta-hydroxysteroid dehydrogenase [1.1.1.51]	0	5.71182e-08	0	5.2509e-07	1.05001e-05	2.98182e-07	no
1.1.1.52-RXN: (expasy) 3-alpha-hydroxycholanate dehydrogenase (NAD(+)) [1.1.1.52]	2.81949e-06	7.40777e-07	2.35531e-07	1.76926e-07	5.98711e-06	2.7085e-07	no
1.1.1.53-RXN: (expasy) 3-alpha(or 20-beta)-hydroxysteroid dehydrogenase [1.1.1.53]	5.19563e-06	0	2.62769e-07	4.62089e-07	6.34325e-06	0	no
1.1.1.64-RXN: (expasy) Testosterone 17-beta-dehydrogenase (NADP(+)) [1.1.1.64]	0	1.49218e-06	6.11882e-07	2.06799e-06	1.35564e-07	3.40909e-07	no
1.1.1.8-RXN: (expasy) Glycerol-3-phosphate dehydrogenase (NAD(+)) [1.1.1.8]	2.19239e-07	0	0	1.82419e-08	0	2.6301e-05	no
1.1.1.83-RXN: (expasy) D-malate dehydrogenase (decarboxylating) [1.1.1.83]	6.62718e-07	4.54391e-08	0	0	3.82755e-07	1.63141e-05	no
1.1.99.25-RXN: (expasy) Quinate dehydrogenase (quinone) [1.1.5.8]	0	0	0	0	0	0	no
1.1.99.28-RXN: (expasy) Glucose-fructose oxidoreductase [1.1.99.28]	1.09268e-05	4.70037e-05	2.6504e-05	7.99176e-06	6.71046e-05	3.66801e-05	no
1.10.2.2-RXN: (expasy) Quinol--cytochrome-c reductase [7.1.1.8]	2.44009e-08	0	0	0	0	0	no
1.11.1.15-RXN: (expasy) Thioredoxin-dependent peroxiredoxin [1.11.1.24]	1.61116e-08	0	0	0	0	4.48241e-06	no
1.12.1.3-RXN: (expasy) Hydrogen dehydrogenase (NADP(+)) [1.12.1.3]	1.9188e-05	3.24891e-06	8.04886e-07	1.95532e-06	1.81257e-05	3.16671e-06	no
1.12.5.1-RXN: (expasy) Hydrogen:quinone oxidoreductase [1.12.5.1]	0	0	0	0	0	1.0172e-06	no
1.13.11.15-RXN: (expasy) 3,4-dihydroxyphenylacetate 2,3-dioxygenase [1.13.11.15]	4.1386e-07	0	0	4.75508e-08	7.48021e-07	2.14519e-05	no
1.13.11.16-RXN: (expasy) 3-carboxyethylcatechol 2,3-dioxygenase [1.13.11.16]	3.93217e-07	0	0	6.92687e-08	0	1.68862e-05	no
1.13.11.6-RXN: (expasy) 3-hydroxyanthranilate 3,4-dioxygenase [1.13.11.6]	1.27655e-06	0	0	0	7.06988e-07	0	no
1.14.12.1-RXN: (expasy) Anthranilate 1,2-dioxygenase (deaminating, decarboxylating) [1.14.12.1]	3.20614e-08	0	0	3.87016e-08	0	9.15069e-06	no
1.14.12.18-RXN: (expasy) Biphenyl 2,3-dioxygenase [1.14.12.18]	4.89959e-08	0	0	0	0	3.22365e-06	no
1.14.13.59-RXN: (expasy) L-lysine N(6)-monooxygenase (NADPH) [1.14.13.59]	1.76779e-07	0	0	0	0	1.81394e-07	no
1.15.1.2-RXN: (expasy) Superoxide reductase [1.15.1.2]	8.59228e-05	8.39616e-05	5.91353e-05	4.52997e-05	5.42443e-05	5.58934e-05	no
1.17.4.2-RXN: (expasy) Ribonucleoside-triphosphate reductase (thioredoxin) [1.17.4.2]	0.000208445	0.000190332	0.000154617	0.000126705	0.000196834	0.000172746	no
1.18.1.2-RXN: (expasy) Ferredoxin--NADP(+) reductase [1.18.1.2]	1.97373e-05	1.77939e-05	3.9464e-06	2.06405e-05	3.28057e-05	3.99625e-05	no
1.2.1.2-RXN: (expasy) Formate dehydrogenase [1.17.1.9]	4.98882e-07	0	0	7.73251e-07	7.31721e-07	0.000156777	no
1.2.1.27-RXN: (expasy) Methylmalonate-semialdehyde dehydrogenase (CoA acylating) [1.2.1.27]	2.00376e-06	7.2452e-08	0	2.76928e-07	4.84536e-06	1.58172e-07	no
1.2.1.58-RXN: (expasy) Phenylglyoxylate dehydrogenase (acylating) [1.2.1.58]	1.34251e-07	1.2477e-07	0	5.33094e-07	6.11304e-07	2.85047e-07	no
1.2.1.66-RXN: (expasy) S-(hydroxymethyl)mycothiol dehydrogenase [1.1.1.306]	0	8.98755e-08	0	0	1.4713e-07	1.35968e-06	no
1.2.1.9-RXN: (expasy) Glyceraldehyde-3-phosphate dehydrogenase (NADP(+)) [1.2.1.9]	1.53326e-07	1.34774e-06	0	1.65436e-06	3.76663e-06	2.54413e-07	no
1.2.3.3-RXN: (expasy) Pyruvate oxidase [1.2.3.3]	1.20553e-05	3.61869e-07	1.42658e-07	5.4558e-06	3.86054e-06	1.93807e-06	no
1.2.4.4-RXN: (expasy) 3-methyl-2-oxobutanoate dehydrogenase (2-methylpropanoyl-transferring) [1.2.4.4]	1.27632e-06	1.72534e-06	1.0682e-06	1.42566e-06	1.38972e-05	1.08158e-06	no
1.2.7.4-RXN: (expasy) Anaerobic carbon-monoxide dehydrogenase [1.2.7.4]	5.71914e-05	8.03608e-05	3.92532e-05	3.01845e-05	8.1077e-05	8.15136e-05	no
1.2.7.5-RXN: (expasy) Aldehyde ferredoxin oxidoreductase [1.2.7.5]	2.5218e-06	1.05657e-06	1.58234e-06	6.46844e-07	4.1518e-06	3.32513e-06	no
1.2.7.7-RXN: (expasy) 3-methyl-2-oxobutanoate dehydrogenase (ferredoxin) [1.2.7.7]	1.67694e-05	9.33544e-06	1.04186e-05	2.68114e-06	5.0416e-06	2.78257e-06	no
1.2.7.8-RXN: (expasy) Indolepyruvate ferredoxin oxidoreductase [1.2.7.8]	6.91742e-05	7.96682e-05	6.94786e-05	7.03596e-05	9.32599e-05	4.42365e-05	no
1.2.99.7-RXN: (expasy) Aldehyde dehydrogenase (FAD-independent) [1.2.99.7]	3.80067e-05	8.27116e-05	5.56506e-05	3.20926e-05	6.35819e-05	5.02397e-05	no
1.21.4.1-RXN: (expasy) D-proline reductase [1.21.4.1]	1.43063e-05	4.99577e-05	3.37553e-05	1.52258e-05	5.31421e-06	3.87928e-05	no
1.21.4.3-RXN: (expasy) Sarcosine reductase [1.21.4.3]	9.05858e-07	0.000123629	7.13496e-06	2.84725e-05	6.2627e-06	2.8877e-05	no
1.21.4.4-RXN: (expasy) Betaine reductase [1.21.4.4]	2.03324e-06	0.000129098	7.46464e-06	2.94927e-05	7.98047e-06	3.02217e-05	no
1.3.1.2-RXN: (expasy) Dihydropyrimidine dehydrogenase (NADP(+)) [1.3.1.2]	0	1.59632e-06	6.25702e-07	2.67516e-06	2.50422e-06	1.24644e-06	no
1.3.1.20-RXN: (expasy) Trans-1,2-dihydrobenzene-1,2-diol dehydrogenase [1.3.1.20]	1.11257e-05	2.0304e-07	2.12301e-07	0	1.73828e-06	0	no
1.3.1.25-RXN: (expasy) 1,6-dihydroxycyclohexa-2,4-diene-1-carboxylate dehydrogenase [1.3.1.25]	0	0	0	0	0	6.43604e-06	no
1.3.1.54-RXN: (expasy) Precorrin-6A reductase [1.3.1.54]	9.40141e-06	2.34115e-05	5.80986e-05	5.37558e-05	2.81207e-05	4.50763e-05	no
1.3.99.15-RXN: (expasy) Benzoyl-CoA reductase [1.3.7.8]	2.41128e-05	8.7363e-05	4.23965e-05	2.9809e-05	3.40997e-05	6.37535e-05	no
1.4.1.11-RXN: (expasy) L-erythro-3,5-diaminohexanoate dehydrogenase [1.4.1.11]	5.88415e-07	9.36532e-08	1.00639e-07	3.73501e-07	8.39967e-07	7.12964e-08	no
1.4.1.21-RXN: (expasy) Aspartate dehydrogenase [1.4.1.21]	9.86858e-06	4.33009e-06	4.19861e-06	1.0757e-05	1.06327e-05	1.38784e-07	no
1.4.3.19-RXN: (expasy) AMBIGUOUS [1.4.3.19; 1.4.3.3]	0	3.45659e-07	3.84196e-07	6.60325e-07	9.5713e-07	6.06302e-06	no
1.4.99.5-RXN: (expasy) Glycine dehydrogenase (cyanide-forming) [1.4.99.5]	1.63406e-06	0	8.18068e-08	1.50468e-06	0	5.85026e-07	no
1.5.1.20-RXN: (expasy) Methylenetetrahydrofolate reductase (NAD(P)H) [1.5.1.20]	0.000192829	0.000203477	0.000175108	0.000178499	0.000180823	0.000176499	no
1.5.1.24-RXN: (expasy) N(5)-(carboxyethyl)ornithine synthase [1.5.1.24]	5.52405e-07	4.89014e-07	1.82654e-07	0	5.78801e-07	0	no
1.5.1.28-RXN: (expasy) Opine dehydrogenase [1.5.1.28]	2.86146e-07	3.08859e-07	3.32014e-07	1.34517e-06	2.69917e-07	2.01936e-06	no
1.5.1.34-RXN: (expasy) 6,7-dihydropteridine reductase [1.5.1.34]	9.51896e-06	6.87346e-06	6.2342e-06	2.02711e-06	4.05496e-06	3.75554e-05	no
1.5.1.7-RXN: (expasy) Saccharopine dehydrogenase (NAD(+), L-lysine-forming) [1.5.1.7]	6.04781e-06	3.47013e-05	4.01405e-05	2.34337e-05	2.16172e-05	3.04159e-05	no
1.5.5.1-RXN-YEAST: (expasy) Electron-transferring-flavoprotein dehydrogenase [1.5.5.1]	6.0423e-07	2.54119e-07	0	1.09169e-07	0	2.13018e-05	no
1.5.8.2-RXN: (expasy) Trimethylamine dehydrogenase [1.5.8.2]	0	0	0	0	0	1.7092e-07	no
1.5.99.9-RXN: (expasy) Methylenetetrahydromethanopterin dehydrogenase [1.5.98.1]	1.46123e-07	0	0	9.73949e-06	6.5465e-06	0	no
1.6.4.4-RXN: (expasy) Protein-disulfide reductase [1.8.1.8]	7.09489e-06	2.59274e-06	2.25402e-06	3.4836e-06	1.28473e-05	8.50546e-05	no
1.6.99.5-RXN: (expasy) NADH:ubiquinone reductase (non-electrogenic) [1.6.5.9]	0	0	0	0	5.25237e-06	0	no
1.7.2.2-RXN: (expasy) Nitrite reductase (cytochrome; ammonia-forming) [1.7.2.2]	2.53012e-05	1.04068e-05	1.44089e-05	4.87944e-06	8.29835e-06	4.6965e-05	no
1.7.2.3-RXN: (expasy) Trimethylamine-N-oxide reductase [1.7.2.3]	8.76507e-07	0	0	1.22145e-07	2.79579e-07	0.000132813	no
1.8.1.15-RXN: (expasy) Mycothione reductase [1.8.1.15]	0	0	0	0	8.08633e-08	0	no
1.8.1.4-RXN: (expasy) Dihydrolipoyl dehydrogenase [1.8.1.4]	0.000131188	3.61987e-05	4.4383e-05	4.62633e-05	0.000107393	7.27556e-05	no
1.8.4.12-RXN: (expasy) Peptide-methionine (R)-S-oxide reductase [1.8.4.12]	3.29984e-05	9.27982e-06	3.43447e-05	4.14154e-05	8.72874e-05	3.15958e-05	no
1.8.4.13-RXN: (expasy) L-methionine (S)-S-oxide reductase [1.8.4.13]	0	0	0	0	0	3.66576e-06	no
1.8.4.14-RXN: (expasy) L-methionine (R)-S-oxide reductase [1.8.4.14]	4.03341e-06	4.21725e-06	9.79126e-06	1.98603e-06	4.92624e-06	2.39282e-05	no
1.8.4.8-RXN: (expasy) Phosphoadenylyl-sulfate reductase (thioredoxin) [1.8.4.8]	1.81951e-06	2.17676e-06	1.86829e-07	1.0834e-06	4.12095e-06	2.73877e-05	no
1.8.98.1-RXN: (expasy) Dihydromethanophenazine:CoB--CoM heterodisulfide reductase [1.8.98.1]	3.26032e-07	5.97349e-07	2.30387e-08	7.89646e-06	6.41149e-06	6.30841e-08	no
1.97.1.2-RXN: (expasy) Pyrogallol hydroxytransferase [1.97.1.2]	0	0	5.5599e-08	1.13593e-07	0	2.70152e-07	no
13-PROPANEDIOL-DEHYDROGENASE-RXN: (expasy) 1,3-propanediol dehydrogenase [1.1.1.202]	1.37976e-05	5.88164e-05	2.88545e-05	2.287e-05	3.69666e-05	1.49369e-05	no
1PFRUCTPHOSN-RXN: (expasy) 1-phosphofructokinase [2.7.1.56]	4.40436e-07	1.05139e-06	0	1.7677e-06	3.99249e-07	6.96234e-06	no
1TRANSKETO-RXN: (expasy) Transketolase [2.2.1.1]	0.000121047	0.000169308	0.00014861	0.000183638	0.000150043	0.000236275	no
2-AMINOADIPATE-AMINOTRANSFERASE-RXN: (expasy) 2-aminoadipate transaminase [2.6.1.39]	2.78473e-05	3.55977e-06	7.11676e-06	9.76648e-06	7.82186e-06	7.9828e-06	no
2-CHLOROBENZOATE-12-DIOXYGENASE-RXN: (expasy) 2-halobenzoate 1,2-dioxygenase [1.14.12.13]	0	0	0	0	0	0	no
2-DEHYDROPANTOATE-REDUCT-RXN: (expasy) 2-dehydropantoate 2-reductase [1.1.1.169]	0.000130352	0.000156035	0.000146542	0.000116258	0.000145829	0.000112318	no
2-ENOATE-REDUCTASE-RXN: (expasy) 2-enoate reductase [1.3.1.31]	2.85022e-06	1.40188e-07	0	0	4.0647e-06	6.14853e-07	no
2-HALOACID-DEHALOGENASE-RXN: (expasy) AMBIGUOUS [3.8.1.10; 3.8.1.2]	1.52137e-05	3.07668e-05	8.84862e-06	1.97263e-05	1.11977e-05	9.82359e-07	no
2-ISOPROPYLMALATESYN-RXN: (expasy) 2-isopropylmalate synthase [2.3.3.13]	0.000224628	0.000184727	0.000194634	0.000180217	0.000185692	0.000190646	no
2-METHYLCITRATE-DEHYDRATASE-RXN: (expasy) 2-methylcitrate dehydratase [4.2.1.79]	2.32985e-07	0	0	2.72771e-07	0	3.10094e-05	no
2-METHYLCITRATE-SYNTHASE-RXN: (expasy) 2-methylcitrate synthase [2.3.3.5]	2.23218e-06	3.88407e-06	2.61495e-06	1.56712e-05	7.56804e-06	5.12893e-05	no
2-METHYLENEGLUTARATE-MUTASE-RXN: (expasy) 2-methyleneglutarate mutase [5.4.99.4]	5.55639e-08	0	0	0	2.02881e-07	0	no
2-NITROPROPANE-DIOXYGENASE-RXN: (expasy) Nitronate monooxygenase [1.13.12.16]	4.10395e-05	9.25263e-05	6.99166e-05	0.00010836	6.80185e-05	5.36694e-05	no
2-OCTAPRENYL-6-METHOXYPHENOL-HYDROX-RXN: NO_NAME	2.28776e-08	0	0	0	0	6.83845e-06	no
2-OCTAPRENYL-6-OHPHENOL-METHY-RXN: (metacyc) 2-octaprenyl-6-hydroxyphenyl methylase [2.1.1.222]	1.12374e-05	2.42431e-07	0	2.06785e-07	6.44389e-06	1.7627e-05	no
2-OCTAPRENYL-METHOXY-BENZOQ-METH-RXN: (expasy) 2-methoxy-6-polyprenyl-1,4-benzoquinol methylase [2.1.1.201]	3.37324e-07	1.05624e-06	1.10518e-07	3.90862e-07	7.17343e-07	1.30025e-05	no
2-OCTAPRENYLPHENOL-HYDROX-RXN: (expasy) 2-polyprenylphenol 6-hydroxylase [1.14.13.240]	0	0	0	0	0	1.12155e-07	no
2-OXOBUTYRATE-SYNTHASE-RXN: (expasy) 3-methyl-2-oxobutanoate dehydrogenase (ferredoxin) [1.2.7.7]	1.67694e-05	9.33544e-06	1.04186e-05	2.68114e-06	5.0416e-06	2.78257e-06	no
2-OXOGLUTARATE-SYNTHASE-RXN: (expasy) 2-oxoglutarate synthase [1.2.7.3]	1.03635e-06	8.56177e-07	1.59312e-06	5.39311e-06	5.419e-06	6.314e-07	no
2-OXOPENT-4-ENOATE-HYDRATASE-RXN: (expasy) 2-oxopent-4-enoate hydratase [4.2.1.80]	1.86876e-07	0	0	1.67666e-07	1.03934e-07	3.42456e-05	no
2.1.1.113-RXN: (expasy) Site-specific DNA-methyltransferase (cytosine-N(4)-specific) [2.1.1.113]	0	8.94093e-08	1.66633e-07	7.44975e-08	0	1.16702e-07	no
2.1.1.130-RXN: (expasy) Precorrin-2 C(20)-methyltransferase [2.1.1.130]	2.41505e-05	1.93559e-05	2.43889e-05	2.06926e-05	3.13767e-05	2.18119e-05	no
2.1.1.131-RXN: (expasy) Precorrin-3B C(17)-methyltransferase [2.1.1.131]	5.646e-06	2.06798e-05	4.80096e-05	2.43339e-05	1.81934e-05	2.76395e-05	no
2.1.1.132-RXN: (expasy) Precorrin-6B C(5,15)-methyltransferase (decarboxylating) [2.1.1.132]	2.17704e-05	2.89831e-05	5.61524e-05	2.75107e-05	7.80357e-06	1.15484e-05	no
2.1.1.133-RXN: (expasy) Precorrin-4 C(11)-methyltransferase [2.1.1.133]	2.15575e-05	2.24574e-05	5.59353e-05	2.82669e-05	3.62919e-05	2.61657e-05	no
2.1.1.151-RXN: (expasy) Cobalt-factor II C(20)-methyltransferase [2.1.1.151]	3.91201e-05	9.14704e-05	4.64184e-05	3.22686e-05	7.19693e-05	3.84816e-05	no
2.1.1.34-RXN: (expasy) tRNA (guanosine(18)-2'-O)-methyltransferase [2.1.1.34]	2.87789e-06	5.01962e-06	5.07676e-06	6.15853e-06	2.08571e-05	1.92198e-05	no
2.1.1.63-RXN: (expasy) Methylated-DNA--[protein]-cysteine S-methyltransferase [2.1.1.63]	0.000225022	0.000162303	0.000195451	0.000181512	0.00021578	0.000180629	no
2.1.1.64-RXN: (expasy) 3-demethylubiquinol 3-O-methyltransferase [2.1.1.64]	1.62497e-05	1.34668e-05	8.28304e-06	4.28434e-06	9.67936e-06	3.17802e-05	no
2.1.1.72-RXN: (expasy) Site-specific DNA-methyltransferase (adenine-specific) [2.1.1.72]	0.000187953	0.000167112	0.000185188	0.000244534	0.000167383	0.00019892	no
2.1.1.74-RXN: (expasy) (NAD(P)H-oxidizing) [2.1.1.74]	2.12922e-05	2.87289e-05	5.71521e-05	8.96442e-05	4.73624e-05	2.32271e-05	no
2.1.1.77-RXN: (expasy) Protein-L-isoaspartate(D-aspartate) O-methyltransferase [2.1.1.77]	2.16883e-07	5.04558e-07	0	1.99343e-07	1.72906e-07	2.38461e-05	no
2.1.1.79-RXN: (expasy) Cyclopropane-fatty-acyl-phospholipid synthase [2.1.1.79]	8.47819e-05	2.40663e-05	1.13015e-05	2.40538e-06	3.11355e-05	4.00072e-05	no
2.1.1.86-RXN: (expasy) Tetrahydromethanopterin S-methyltransferase [2.1.1.86]	3.89212e-08	0	0	1.99154e-05	4.99919e-05	1.79076e-06	yes
2.1.3.1-RXN: (expasy) Methylmalonyl-CoA carboxytransferase [2.1.3.1]	3.43273e-05	5.75837e-05	4.54814e-05	4.20719e-05	5.98116e-05	2.62603e-05	no
2.1.3.9-RXN: (expasy) N-acetylornithine carbamoyltransferase [2.1.3.9]	2.25761e-05	1.57567e-05	2.31012e-05	6.65053e-06	2.16499e-05	5.50041e-06	no
2.1.4.2-RXN: (expasy) Scyllo-inosamine-4-phosphate amidinotransferase [2.1.4.2]	0	0	0	0	2.90719e-06	0	no
2.3.1.101-RXN: (expasy) Formylmethanofuran--tetrahydromethanopterin N-formyltransferase [2.3.1.101]	6.81562e-08	0	0	9.7168e-06	6.04896e-06	0	no
2.3.1.118-RXN: (expasy) N-hydroxyarylamine O-acetyltransferase [2.3.1.118]	4.94865e-07	2.09629e-06	3.70666e-07	6.35627e-07	1.61293e-05	3.82793e-05	no
2.3.1.128-RXN: (expasy) [Ribosomal protein S18]-alanine N-acetyltransferase [2.3.1.266]	6.8311e-05	9.7537e-05	8.81543e-05	0.00013348	7.71623e-05	0.000103986	no
2.3.1.157-RXN: (expasy) Glucosamine-1-phosphate N-acetyltransferase [2.3.1.157]	8.63746e-05	2.21121e-05	2.40929e-05	5.73522e-05	5.5722e-05	4.01377e-05	no
2.3.1.179-RXN: (expasy) Beta-ketoacyl-[acyl-carrier-protein] synthase II [2.3.1.179]	0.000156256	0.000223322	0.000210266	0.000211987	0.00018446	0.000177171	no
2.3.1.180-RXN: (expasy) Beta-ketoacyl-[acyl-carrier-protein] synthase III [2.3.1.180]	0.000132702	0.000162206	0.000182795	0.000180601	0.000144122	0.000142294	no
2.3.1.41-RXN: (expasy) Beta-ketoacyl-[acyl-carrier-protein] synthase I [2.3.1.41]	4.89376e-05	3.31571e-06	5.05721e-06	4.90648e-06	1.81789e-05	6.44207e-05	no
2.3.1.89-RXN: (expasy) Tetrahydrodipicolinate N-acetyltransferase [2.3.1.89]	2.0184e-05	1.35646e-05	9.14723e-06	3.40276e-05	2.82242e-05	1.80817e-05	no
2.3.2.10-RXN: (expasy) UDP-N-acetylmuramoylpentapeptide-lysine N(6)-alanyltransferase [2.3.2.10]	2.04075e-07	8.73823e-07	9.07732e-08	3.43529e-06	4.22259e-06	2.2866e-07	no
2.3.2.13-RXN: (expasy) Protein-glutamine gamma-glutamyltransferase [2.3.2.13]	1.9591e-06	0	0	1.00481e-06	6.99659e-07	1.98862e-07	no
2.4.1.109-RXN: (expasy) Dolichyl-phosphate-mannose--protein mannosyltransferase [2.4.1.109]	9.316e-07	2.11065e-07	1.16163e-06	1.42477e-05	3.68103e-06	1.94205e-06	no
2.4.1.119-RXN: (expasy) Dolichyl-diphosphooligosaccharide--protein glycotransferase [2.4.99.18]	0	0	0	0	8.81897e-06	0	no
2.4.1.122-RXN: (expasy) N-acetylgalactosaminide beta-1,3-galactosyltransferase [2.4.1.122]	1.45585e-07	0	0	0	0	1.69419e-07	no
2.4.1.124-RXN: (metacyc) N-acetyllactosamine 3-&alpha;-galactosyltransferase [2.4.1.87]	0	0	0	0	0	0	no
2.4.1.125-RXN: (expasy) AMBIGUOUS [2.4.1.125; 2.4.1.5]	1.28006e-05	4.84217e-05	1.93984e-05	6.20718e-05	5.35142e-05	2.36922e-05	no
2.4.1.129-RXN: (expasy) Peptidoglycan glycosyltransferase [2.4.1.129]	6.99157e-05	6.27629e-05	8.45384e-05	8.35514e-05	8.34294e-05	0.000227931	no
2.4.1.150-RXN: (expasy) N-acetyllactosaminide beta-1,6-N-acetylglucosaminyltransferase [2.4.1.150]	1.18012e-07	1.71076e-07	5.38142e-08	1.34798e-06	2.64104e-07	1.4097e-06	no
2.4.1.151-RXN: (expasy) N-acetyllactosaminide 3-alpha-galactosyltransferase [2.4.1.87]	0	0	0	0	0	0	no
2.4.1.211-RXN: (expasy) 1,3-beta-galactosyl-N-acetylhexosamine phosphorylase [2.4.1.211]	3.29202e-05	4.36431e-05	6.61852e-05	7.31046e-05	3.41259e-05	4.89644e-05	no
2.4.1.212-RXN: (expasy) Hyaluronan synthase [2.4.1.212]	9.16224e-05	0.000264498	0.000146973	0.000195036	0.000175732	0.000109201	no
2.4.1.216-RXN: (expasy) Trehalose 6-phosphate phosphorylase [2.4.1.216]	9.52428e-08	0	0	0	0	0	no
2.4.1.230-RXN: (expasy) Kojibiose phosphorylase [2.4.1.230]	8.95758e-06	2.47186e-05	4.28329e-06	7.94608e-06	4.38764e-06	3.77548e-05	no
2.4.1.54-RXN: (expasy) Undecaprenyl-phosphate mannosyltransferase [2.4.1.54]	2.35776e-05	8.03665e-06	5.8835e-06	2.17781e-06	4.73754e-06	1.53524e-06	no
2.4.1.57-RXN: (expasy) Phosphatidyl-myo-inositol alpha-mannosyltransferase [2.4.1.345]	2.79449e-05	4.28253e-06	1.7102e-06	1.14176e-07	3.49945e-06	3.56084e-06	no
2.4.1.83-RXN: (expasy) Dolichyl-phosphate beta-D-mannosyltransferase [2.4.1.83]	5.05172e-06	1.84638e-06	2.66481e-06	1.90594e-06	3.344e-06	1.09962e-06	no
2.4.2.31-RXN: (expasy) NAD(+)--protein-arginine ADP-ribosyltransferase [2.4.2.31]	4.14509e-07	1.71284e-06	8.13978e-06	2.68614e-06	5.21675e-07	6.08702e-07	no
2.5.1.19-RXN: (expasy) 3-phosphoshikimate 1-carboxyvinyltransferase [2.5.1.19]	0.000185662	0.000179165	0.000186685	0.000193665	0.000177578	0.000164462	no
2.5.1.41-RXN: (expasy) Phosphoglycerol geranylgeranyltransferase [2.5.1.41]	3.66014e-08	0	0	6.99512e-06	5.86476e-06	7.41168e-08	no
2.5.1.42-RXN: (expasy) Geranylgeranylglycerol-phosphate geranylgeranyltransferase [2.5.1.42]	7.32288e-08	0	0	7.63088e-06	5.45604e-06	7.79146e-08	no
2.5.1.64-RXN: (expasy) synthase [2.2.1.9]	2.71321e-05	1.41408e-05	2.00083e-05	4.17027e-05	3.07025e-05	3.89439e-05	no
2.5.1.65-RXN: (expasy) O-phosphoserine sulfhydrylase [2.5.1.65]	0	0	0	0	0	0	no
2.5.1.66-RXN: (expasy) N(2)-(2-carboxyethyl)arginine synthase [2.5.1.66]	0	0	0	0	5.06312e-06	0	no
2.6.1.14-RXN: (expasy) Asparagine--oxo-acid transaminase [2.6.1.14]	0	0	0	2.00713e-07	0	0	no
2.6.1.22-RXN: (expasy) (S)-3-amino-2-methylpropionate transaminase [2.6.1.22]	0	0	0	0	0	1.31307e-06	no
2.6.1.33-RXN: (expasy) dTDP-4-amino-4,6-dideoxy-D-glucose transaminase [2.6.1.33]	6.40151e-07	1.33753e-06	0	1.36213e-06	3.28209e-07	0	no
2.6.1.37-RXN: (metacyc) phosphonoacetaldehyde transaminase [2.6.1.37]	3.16857e-05	1.7915e-05	2.79337e-05	1.0691e-05	2.08703e-05	3.10857e-05	no
2.6.1.50-RXN: (expasy) Glutamine--scyllo-inositol transaminase [2.6.1.50]	1.03426e-07	0	1.21749e-07	0	3.26584e-07	0	no
2.6.1.57-RXN: (expasy) Aromatic-amino-acid transaminase [2.6.1.57]	1.10773e-07	0	0	8.49555e-08	3.44949e-07	3.09122e-05	no
2.6.1.82-RXN: (expasy) Putrescine--2-oxoglutarate transaminase [2.6.1.82]	1.54379e-06	0	8.90171e-08	2.20233e-06	1.26596e-07	3.52342e-05	no
2.7.1.121-RXN: (expasy) Phosphoenolpyruvate--glycerone phosphotransferase [2.7.1.121]	1.86742e-05	2.91217e-05	1.46644e-05	1.32405e-05	9.33991e-06	1.70421e-05	no
2.7.1.148-RXN: (expasy) 4-(cytidine 5'-diphospho)-2-C-methyl-D-erythritol kinase [2.7.1.148]	0.0002151	0.00021456	0.000205076	0.000203448	0.000201532	0.000191902	no
2.7.1.156-RXN: (expasy) Adenosylcobinamide kinase [2.7.1.156]	2.27207e-05	0.000151795	8.43496e-05	6.65717e-05	8.55473e-05	0.000165056	no
2.7.1.160-RXN: (expasy) 2'-phosphotransferase [2.7.1.160]	0	0	0	0	9.52318e-06	0	no
2.7.1.63-RXN: (expasy) Polyphosphate--glucose phosphotransferase [2.7.1.63]	2.18742e-07	1.55857e-06	4.55553e-07	4.03275e-06	3.49189e-07	1.94681e-06	no
2.7.1.90-RXN: (expasy) Diphosphate--fructose-6-phosphate 1-phosphotransferase [2.7.1.90]	0.000172706	0.000244909	0.000222015	0.000167998	0.000174443	0.000183605	no
2.7.10.1-RXN: (expasy) AMBIGUOUS [2.7.10.1; 2.7.10.2; 2.7.12.1]	8.36733e-05	0.00015929	0.000103853	0.000114412	7.69302e-05	0.000145465	no
2.7.12.2-RXN: (expasy) Mitogen-activated protein kinase kinase [2.7.12.2]	0	0	0	0	0	1.74739e-07	no
2.7.13.3-RXN: (expasy) Histidine kinase [2.7.13.3]	0.00282225	0.00464674	0.00365354	0.00327129	0.00348999	0.00403222	no
2.7.3.9-RXN: (expasy) Phosphoenolpyruvate--protein phosphotransferase [2.7.3.9]	0.000326326	0.000238042	0.000221653	0.000220672	0.000209316	0.000306057	no
2.7.7.1-RXN: (expasy) Nicotinamide-nucleotide adenylyltransferase [2.7.7.1]	3.85489e-07	7.68131e-08	0	6.98992e-06	6.63639e-06	6.16151e-06	yes
2.7.7.13-RXN: (expasy) Mannose-1-phosphate guanylyltransferase [2.7.7.13]	2.79061e-05	1.74321e-05	3.32193e-05	1.26279e-05	3.66786e-05	5.31385e-05	no
2.7.7.15-RXN: (expasy) Choline-phosphate cytidylyltransferase [2.7.7.15]	0	0	0	7.50409e-08	1.91768e-07	0	no
2.7.7.33-RXN: (expasy) Glucose-1-phosphate cytidylyltransferase [2.7.7.33]	3.50248e-05	1.758e-05	3.66028e-05	3.38865e-05	7.91876e-06	2.51507e-05	no
2.7.7.39-RXN: (expasy) Glycerol-3-phosphate cytidylyltransferase [2.7.7.39]	6.70289e-05	0.000107302	4.09444e-05	4.83665e-05	7.13797e-05	4.43807e-05	no
2.7.7.40-RXN: (expasy) D-ribitol-5-phosphate cytidylyltransferase [2.7.7.40]	1.29404e-06	6.66255e-06	1.49727e-05	7.94786e-06	1.43809e-05	9.26101e-06	no
2.7.7.60-RXN: (expasy) 2-C-methyl-D-erythritol 4-phosphate cytidylyltransferase [2.7.7.60]	0.00021756	0.000210969	0.000201934	0.000192041	0.000170505	0.000182166	no
2.7.7.61-RXN: (expasy) Citrate lyase holo-[acyl-carrier protein] synthase [2.7.7.61]	4.80211e-06	9.85823e-08	3.41394e-06	2.59403e-06	4.15891e-06	4.58661e-05	no
2.7.7.64-RXN: (expasy) UTP-monosaccharide-1-phosphate uridylyltransferase [2.7.7.64]	0	0	0	0	0	0	no
2.7.7.8-RXN: (expasy) Polyribonucleotide nucleotidyltransferase [2.7.7.8]	0.000200471	0.000174567	0.000191934	0.000206711	0.000193919	0.000154932	no
2.7.8.11-RXN: (expasy) CDP-diacylglycerol--inositol 3-phosphatidyltransferase [2.7.8.11]	1.04221e-05	2.45602e-06	7.83463e-06	3.55834e-06	1.91784e-06	1.81374e-06	no
2.7.8.23-RXN: (expasy) Carboxyvinyl-carboxyphosphonate phosphorylmutase [2.7.8.23]	4.51438e-07	0	1.014e-07	0	7.2509e-07	1.75703e-07	no
2.7.8.24-RXN: (expasy) Phosphatidylcholine synthase [2.7.8.24]	0	4.26584e-08	0	1.38703e-07	0	3.07749e-07	no
2.7.8.25-RXN: (expasy) Triphosphoribosyl-dephospho-CoA synthase [2.4.2.52]	1.20728e-05	2.47083e-05	1.23723e-05	1.78897e-05	1.79668e-05	3.29171e-05	no
2.7.8.6-RXN: (expasy) Undecaprenyl-phosphate galactose phosphotransferase [2.7.8.6]	1.29691e-05	1.80903e-05	1.5544e-05	1.94457e-05	1.52337e-05	3.74583e-06	no
2.7.9.3-RXN: (expasy) Selenide, water dikinase [2.7.9.3]	7.72481e-05	0.000135003	0.000126519	0.00010799	9.68635e-05	0.000141676	no
2.8.1.5-RXN: (expasy) Thiosulfate--dithiol sulfurtransferase [2.8.1.5]	0	0	0	0	0	4.39589e-06	no
2.8.1.6-RXN: (expasy) Biotin synthase [2.8.1.6]	8.41835e-05	0.000168121	0.000143012	9.23801e-05	0.000153092	0.000129213	no
2.8.3.10-RXN: (expasy) Citrate CoA-transferase [2.8.3.10]	2.86621e-05	2.66191e-05	1.84742e-05	1.90745e-05	3.37484e-05	2.31703e-05	no
2.8.3.17-RXN: (expasy) 3-(aryl)acryloyl-CoA:(R)-3-(aryl)lactate CoA-transferase [2.8.3.17]	2.97749e-06	7.35464e-07	0	0	3.37239e-06	3.77995e-07	no
2.8.3.9-RXN: (expasy) Butyrate--acetoacetate CoA-transferase [2.8.3.9]	9.12493e-07	3.28054e-06	1.53967e-06	8.31972e-06	7.37915e-06	1.16212e-06	no
2.9.1.1-RXN: (expasy) L-seryl-tRNA(Sec) selenium transferase [2.9.1.1]	3.00951e-05	3.12384e-05	1.59541e-05	3.25111e-05	2.1002e-05	7.84864e-05	no
2OXOGLUTDECARB-RXN: (expasy) Oxoglutarate dehydrogenase (succinyl-transferring) [1.2.4.2]	5.0537e-07	4.15482e-07	0	4.98198e-06	1.68121e-05	4.30036e-05	no
2PGADEHYDRAT-RXN: (expasy) Phosphopyruvate hydratase [4.2.1.11]	0.000258144	0.000307154	0.000253927	0.000281668	0.000257942	0.00024863	no
2TRANSKETO-RXN: (expasy) Transketolase [2.2.1.1]	0.000121047	0.000169308	0.00014861	0.000183638	0.000150043	0.000236275	no
3-CH3-2-OXOBUTANOATE-OH-CH3-XFER-RXN: (expasy) 3-methyl-2-oxobutanoate hydroxymethyltransferase [2.1.2.11]	5.72278e-05	5.37938e-05	7.58229e-05	8.95282e-05	8.00125e-05	7.57402e-05	no
3-DEHYDRO-L-GULONATE-2-DEHYDROGENASE-RXN: (expasy) 3-dehydro-L-gulonate 2-dehydrogenase [1.1.1.130]	3.84982e-06	5.00909e-06	1.11917e-06	1.18732e-06	4.78614e-06	2.93896e-05	no
3-DEHYDROQUINATE-DEHYDRATASE-RXN: (expasy) 3-dehydroquinate dehydratase [4.2.1.10]	0.000186519	0.000183918	0.000241769	0.000213105	0.00016545	0.000166123	no
3-DEHYDROQUINATE-SYNTHASE-RXN: (expasy) 3-dehydroquinate synthase [4.2.3.4]	0.000163845	0.000162775	0.000181306	0.000191405	0.000188421	0.000154689	no
3-HYDROXBUTYRYL-COA-DEHYDRATASE-RXN: (expasy) 3-hydroxybutyryl-CoA dehydratase [4.2.1.55]	9.9488e-06	4.1616e-05	4.66539e-05	2.52066e-05	1.55148e-05	1.54105e-05	no
3-HYDROXY-KYNURENINASE-RXN: (expasy) Kynureninase [3.7.1.3]	4.44319e-07	0	0	0	1.20116e-06	0	no
3-HYDROXYBENZOATE-6-MONOOXYGENASE-RXN: (expasy) 3-hydroxybenzoate 6-monooxygenase [1.14.13.24]	0	0	0	0	0	0	no
3-HYDROXYBUTYRATE-DEHYDROGENASE-RXN: (expasy) 3-hydroxybutyrate dehydrogenase [1.1.1.30]	6.60903e-09	0	0	0	1.13032e-05	1.3961e-05	no
3-HYDROXYBUTYRYL-COA-DEHYDROGENASE-RXN: (expasy) 3-hydroxybutyryl-CoA dehydrogenase [1.1.1.157]	1.94294e-05	3.35426e-05	4.16855e-05	3.65622e-05	3.41209e-05	4.15271e-05	no
3-HYDROXYDECANOYL-ACP-DEHYDR-RXN: (expasy) 3-hydroxyacyl-[acyl-carrier-protein] dehydratase [4.2.1.59]	0.000169373	0.000197021	0.000186766	0.000152731	0.000172071	0.000184341	no
3-HYDROXYISOBUTYRATE-DEHYDROGENASE-RXN: (expasy) 3-hydroxyisobutyrate dehydrogenase [1.1.1.31]	1.42811e-07	1.21786e-06	9.45535e-07	2.30818e-06	3.29513e-07	2.59985e-07	no
3-NUCLEOTID-RXN: (expasy) 3'-nucleotidase [3.1.3.6]	1.10743e-06	1.35155e-06	1.81124e-07	9.19905e-06	7.4847e-06	3.70596e-05	no
3-OCTAPRENYL-4-OHBENZOATE-DECARBOX-RXN: (expasy) 4-hydroxy-3-polyprenylbenzoate decarboxylase [4.1.1.98]	0	0	0	1.35178e-08	2.08789e-07	1.21568e-06	no
3-OXOACID-COA-TRANSFERASE-RXN: (expasy) 3-oxoacid CoA-transferase [2.8.3.5]	1.68655e-06	2.95399e-06	1.42752e-06	7.37273e-06	2.63099e-06	6.12374e-06	no
3-OXOACYL-ACP-REDUCT-RXN: (expasy) 3-oxoacyl-[acyl-carrier-protein] reductase [1.1.1.100]	0.00026104	0.000365999	0.000333448	0.000311572	0.000319257	0.000364513	no
3-OXOACYL-ACP-SYNTH-BASE-RXN: (expasy) AMBIGUOUS [2.3.1.179; 2.3.1.41]	0.000156256	0.000223489	0.000210266	0.000211987	0.00018446	0.00017742	no
3-OXOACYL-ACP-SYNTH-RXN: (expasy) AMBIGUOUS [2.3.1.179; 2.3.1.41]	4.89376e-05	3.31571e-06	5.05721e-06	4.90648e-06	1.81789e-05	6.44207e-05	no
3-OXOADIPATE-COA-TRANSFERASE-RXN: (expasy) 3-oxoadipate CoA-transferase [2.8.3.6]	0	0	0	0	0	2.54421e-06	no
3-OXOADIPATE-ENOL-LACTONASE-RXN: (expasy) 3-oxoadipate enol-lactonase [3.1.1.24]	8.37544e-06	1.64718e-07	4.53486e-06	7.84293e-06	2.11503e-06	6.92666e-06	no
3-OXOSTEROID-1-DEHYDROGENASE-RXN: (expasy) 3-oxosteroid 1-dehydrogenase [1.3.99.4]	5.21901e-07	1.15307e-07	2.84821e-06	4.9585e-07	7.31244e-07	0	no
3.1.1.23-RXN: (expasy) Acylglycerol lipase [3.1.1.23]	1.47833e-06	2.02374e-07	0	2.06572e-06	4.89361e-06	1.0259e-06	no
3.1.1.47-RXN: (expasy) 1-alkyl-2-acetylglycerophosphocholine esterase [3.1.1.47]	1.79082e-07	7.96177e-07	2.05532e-06	3.57013e-06	0	7.86009e-08	no
3.1.1.64-RXN: (metacyc) all-trans-retinyl-palmitate hydrolase [3.1.1.1]	1.43912e-05	1.10268e-06	6.02372e-07	1.06599e-06	1.89188e-05	5.03346e-05	no
3.1.1.72-RXN: (expasy) Acetylxylan esterase [3.1.1.72]	1.26227e-05	7.60844e-06	5.98e-06	5.36513e-06	9.55369e-06	1.14966e-06	no
3.1.1.81-RXN: (expasy) Quorum-quenching N-acyl-homoserine lactonase [3.1.1.81]	4.7075e-07	1.55145e-07	4.26053e-07	2.96272e-07	2.10151e-06	1.97425e-06	no
3.1.11.1-RXN: (expasy) Exodeoxyribonuclease I [3.1.11.1]	1.97143e-06	1.92184e-07	0	1.87595e-05	1.10883e-05	6.78607e-05	no
3.1.11.2-RXN: (expasy) Exodeoxyribonuclease III [3.1.11.2]	0.000140282	0.000117922	0.000135146	0.00010235	0.000102989	0.000130461	no
3.1.11.3-RXN: (expasy) Exodeoxyribonuclease (lambda-induced) [3.1.11.3]	6.92064e-08	0	0	0	0	3.65813e-06	no
3.1.11.6-RXN: (expasy) Exodeoxyribonuclease VII [3.1.11.6]	0.000413219	0.000390954	0.000398239	0.000409656	0.000431398	0.000374087	no
3.1.13.1-RXN: (expasy) Exoribonuclease II [3.1.13.1]	0.000127286	0.000162273	0.000167824	0.000152441	0.00016133	0.000218838	no
3.1.13.5-RXN: (expasy) Ribonuclease D [3.1.13.5]	2.84527e-06	6.93193e-06	4.89883e-06	2.29382e-05	1.02403e-05	0.000100503	no
3.1.2.14-RXN: (expasy) Oleoyl-[acyl-carrier-protein] hydrolase [3.1.2.14]	5.9316e-06	0	9.43556e-07	1.90618e-06	4.3431e-06	1.24574e-05	no
3.1.2.21-RXN: (expasy) Dodecanoyl-[acyl-carrier-protein] hydrolase [3.1.2.21]	0	0	0	9.07783e-08	1.95782e-07	0	no
3.1.2.27-RXN: (expasy) Choloyl-CoA hydrolase [3.1.2.27]	0	0	0	0	0	1.54598e-07	no
3.1.21.1-RXN: (expasy) Deoxyribonuclease I [3.1.21.1]	6.33932e-07	0	0	8.35874e-06	2.53062e-06	3.81815e-05	no
3.1.21.2-RXN: (expasy) Deoxyribonuclease IV [3.1.21.2]	0.000164743	0.000124852	0.000129225	8.68222e-05	0.000148135	0.000121534	no
3.1.21.3-RXN: (expasy) Type I site-specific deoxyribonuclease [3.1.21.3]	0.000167395	9.93814e-05	0.00021909	0.000264645	0.000143499	0.000159206	no
3.1.21.4-RXN: (expasy) Type II site-specific deoxyribonuclease [3.1.21.4]	2.32239e-05	2.05797e-05	3.63587e-05	2.66145e-05	3.75955e-05	2.23652e-05	no
3.1.21.5-RXN: (expasy) Type III site-specific deoxyribonuclease [3.1.21.5]	9.76973e-07	6.98599e-06	1.72555e-07	6.89879e-06	7.38627e-06	4.26439e-07	no
3.1.21.7-RXN: (expasy) Deoxyribonuclease V [3.1.21.7]	9.73443e-08	0	0	1.99177e-07	8.70756e-08	3.371e-05	no
3.1.22.4-RXN: NO_NAME	0	3.24072e-07	0	0	0	3.13439e-07	no
3.1.25.1-RXN: (expasy) Deoxyribonuclease (pyrimidine dimer) [3.1.25.1]	0	3.98472e-07	0	0	0	3.62189e-07	no
3.1.26.11-RXN: (expasy) Ribonuclease Z [3.1.26.11]	0.000126038	0.000193861	0.000179822	0.000149751	0.00015969	0.000119588	no
3.1.26.12-RXN: (expasy) Ribonuclease E [3.1.26.12]	3.25121e-05	2.92103e-06	3.78128e-06	4.81027e-06	3.71487e-07	4.22127e-05	no
3.1.26.3-RXN: (expasy) Ribonuclease III [3.1.26.3]	0.000197993	0.000183181	0.000184005	0.000193975	0.000199139	0.000162466	no
3.1.26.4-RXN: (expasy) Ribonuclease H [3.1.26.4]	0.000340444	0.00033627	0.000293003	0.000346357	0.000376184	0.00028414	no
3.1.26.5-RXN: (expasy) Ribonuclease P [3.1.26.5]	0.00028715	0.00026424	0.000257456	0.000307794	0.000277101	0.00021957	no
3.1.26.8-RXN: (expasy) Ribonuclease M5 [3.1.26.8]	2.41944e-05	1.19332e-05	6.90743e-06	2.35458e-05	2.75987e-05	1.51497e-05	no
3.1.27.5-RXN: (expasy) Ribonuclease T(2) [4.6.1.19]	0	0	0	0	0	1.09782e-05	no
3.1.27.6-RXN: (expasy) Enterobacter ribonuclease [4.6.1.21]	1.11398e-07	0	0	0	0	8.40796e-06	no
3.1.27.9-RXN: (expasy) tRNA-intron lyase [4.6.1.16]	0	0	0	0	0	0	no
3.1.3.16-RXN: (expasy) Protein-serine/threonine phosphatase [3.1.3.16]	0.00022829	0.000370614	0.000245056	0.000182261	0.000239997	0.0002307	no
3.1.3.46-RXN: (expasy) Fructose-2,6-bisphosphate 2-phosphatase [3.1.3.46]	5.91801e-05	0	9.91402e-07	1.25854e-07	7.45106e-06	6.01966e-07	no
3.1.3.68-RXN: (expasy) 2-deoxyglucose-6-phosphatase [3.1.3.68]	1.95298e-06	0	4.57087e-07	2.99347e-06	7.43534e-07	7.91257e-06	no
3.1.3.70-RXN: (expasy) Mannosyl-3-phosphoglycerate phosphatase [3.1.3.70]	1.36802e-07	0	0	0	0	3.96805e-05	no
3.1.3.74-RXN: (expasy) Pyridoxal phosphatase [3.1.3.74]	1.54982e-06	7.22842e-08	0	0	1.2196e-06	1.35384e-05	no
3.1.3.77-RXN: (expasy) Acireductone synthase [3.1.3.77]	0	0	0	0	3.50982e-07	0	no
3.1.31.1-RXN: (expasy) Micrococcal nuclease [3.1.31.1]	5.25596e-07	0	0	3.23686e-06	9.7748e-06	2.7238e-05	no
3.1.4.1-RXN: (expasy) Phosphodiesterase I [3.1.4.1]	0	7.79253e-07	3.47265e-07	2.15814e-06	2.37839e-07	4.47561e-08	no
3.1.4.10-RXN: (expasy) Phosphatidylinositol diacylglycerol-lyase [4.6.1.13]	6.11275e-08	1.52127e-06	5.08986e-06	6.37898e-06	1.31243e-05	7.05181e-06	no
3.1.4.14-RXN: (expasy) [Acyl-carrier-protein] phosphodiesterase [3.1.4.14]	7.19124e-07	0	0	0	2.27119e-07	2.24963e-05	no
3.1.4.17-RXN: (expasy) 3',5'-cyclic-nucleotide phosphodiesterase [3.1.4.17]	0	5.63435e-07	2.28068e-07	4.18878e-07	7.14027e-07	1.06645e-05	no
3.1.4.37-RXN: (expasy) 2',3'-cyclic-nucleotide 3'-phosphodiesterase [3.1.4.37]	0	0	0	1.09886e-07	0	0	no
3.1.4.44-RXN: (expasy) Glycerophosphoinositol glycerophosphodiesterase [3.1.4.44]	0	0	0	1.68053e-06	0	0	no
3.11.1.2-RXN: (expasy) Phosphonoacetate hydrolase [3.11.1.2]	0	6.31697e-08	0	0	0	0	no
3.11.1.3-RXN: (expasy) Phosphonopyruvate hydrolase [3.11.1.3]	0	2.25475e-06	0	6.76376e-07	2.81994e-07	2.47667e-06	no
3.2.1.1-RXN: (expasy) Alpha-amylase [3.2.1.1]	5.92087e-05	0.000103769	4.89183e-05	9.24027e-05	0.000107497	0.000142155	no
3.2.1.10-RXN: (expasy) Oligo-1,6-glucosidase [3.2.1.10]	0.000114396	0.000186137	0.000145671	0.000124431	0.000125512	0.000122074	no
3.2.1.103-RXN: (expasy) Keratan-sulfate endo-1,4-beta-galactosidase [3.2.1.103]	0	0	2.78429e-07	0	0	0	no
3.2.1.11-RXN: (expasy) Dextranase [3.2.1.11]	1.55048e-06	2.98853e-06	1.99475e-07	6.96975e-06	5.4809e-06	3.18048e-07	no
3.2.1.129-RXN: (expasy) Endo-alpha-sialidase [3.2.1.129]	0	0	0	0	0	0	no
3.2.1.131-RXN: (expasy) Xylan alpha-1,2-glucuronosidase [3.2.1.131]	2.89638e-05	9.03706e-06	5.6929e-06	2.7289e-06	5.85215e-06	2.53531e-06	no
3.2.1.132-RXN: (expasy) Chitosanase [3.2.1.132]	0	0	0	1.74897e-07	0	0	no
3.2.1.133-RXN: (expasy) Glucan 1,4-alpha-maltohydrolase [3.2.1.133]	2.33091e-07	0	0	0	7.55621e-08	0	no
3.2.1.135-RXN: (expasy) Neopullulanase [3.2.1.135]	6.20681e-05	0.000131998	8.85049e-05	8.96589e-05	8.55664e-05	9.35733e-05	no
3.2.1.136-RXN: (expasy) Glucuronoarabinoxylan endo-1,4-beta-xylanase [3.2.1.136]	9.33448e-07	2.48021e-06	4.92821e-06	2.84918e-06	2.61588e-06	0	no
3.2.1.139-RXN: (expasy) Alpha-glucuronidase [3.2.1.139]	0	8.00419e-07	1.80578e-06	0	1.90962e-07	0	no
3.2.1.14-RXN: (expasy) Chitinase [3.2.1.14]	1.75295e-05	2.51689e-05	1.02112e-05	9.40626e-06	2.73613e-05	7.21958e-06	no
3.2.1.141-RXN: (expasy) 4-alpha-D-((1->4)-alpha-D-glucano)trehalose trehalohydrolase [3.2.1.141]	0	0	3.85124e-07	0	9.02252e-08	0	no
3.2.1.145-RXN: (expasy) Galactan 1,3-beta-galactosidase [3.2.1.145]	4.62958e-05	0	9.31025e-07	0	0	3.64384e-07	no
3.2.1.151-RXN: (expasy) Xyloglucan-specific endo-beta-1,4-glucanase [3.2.1.151]	0	1.24282e-06	3.9424e-06	4.57248e-07	9.23351e-07	0	no
3.2.1.152-RXN: (expasy) Mannosylglycoprotein endo-beta-mannosidase [3.2.1.152]	0	0	0	0	0	3.19723e-07	no
3.2.1.156-RXN: (expasy) Oligosaccharide reducing-end xylanase [3.2.1.156]	9.11496e-06	3.27304e-06	2.39591e-05	3.82789e-05	3.26324e-06	1.14942e-05	no
3.2.1.165-RXN: (expasy) Exo-1,4-beta-D-glucosaminidase [3.2.1.165]	8.76459e-05	7.7482e-05	4.48482e-05	3.27607e-05	5.72763e-05	2.53284e-05	no
3.2.1.17-RXN: (expasy) Lysozyme [3.2.1.17]	4.24182e-05	0.000142473	9.55844e-05	6.29598e-05	0.000142074	0.000118219	no
3.2.1.18-RXN: (expasy) Exo-alpha-sialidase [3.2.1.18]	1.46847e-05	2.31729e-05	3.57781e-06	1.08303e-05	2.95789e-05	1.82296e-06	no
3.2.1.21-RXN: (expasy) Beta-glucosidase [3.2.1.21]	0.00051742	0.000601904	0.000457606	0.000332886	0.000413607	0.000335613	no
3.2.1.23-RXN: (expasy) Beta-galactosidase [3.2.1.23]	0.00089879	0.000857844	0.000752323	0.000542551	0.000754908	0.000546653	no
3.2.1.24-RXN: (expasy) Alpha-mannosidase [3.2.1.24]	0	4.15047e-06	6.07167e-07	1.54884e-06	2.02996e-07	2.86307e-06	no
3.2.1.25-RXN: (expasy) Beta-mannosidase [3.2.1.25]	1.53507e-05	4.10426e-06	1.95304e-05	3.03567e-06	1.01751e-05	1.98887e-07	no
3.2.1.3-RXN: (expasy) Glucan 1,4-alpha-glucosidase [3.2.1.3]	9.47682e-06	2.00123e-06	3.01908e-06	4.66743e-07	1.31417e-06	6.64804e-07	no
3.2.1.32-RXN: (expasy) Endo-1,3-beta-xylanase [3.2.1.32]	1.96929e-06	8.29062e-07	7.34616e-08	1.74754e-06	0	0	no
3.2.1.33-RXN: (expasy) Amylo-alpha-1,6-glucosidase [3.2.1.33]	0	0	0	0	0	0	no
3.2.1.35-RXN: (expasy) Hyaluronoglucosaminidase [3.2.1.35]	1.38381e-05	1.08102e-05	2.02562e-06	8.81221e-06	1.40293e-05	1.37263e-05	no
3.2.1.37-RXN: (expasy) Xylan 1,4-beta-xylosidase [3.2.1.37]	0.000210324	0.00011622	6.34913e-05	9.04823e-05	9.7702e-05	4.76509e-05	no
3.2.1.39-RXN: (expasy) Glucan endo-1,3-beta-D-glucosidase [3.2.1.39]	1.9793e-07	0	1.8672e-05	2.51891e-05	0	4.19861e-07	no
3.2.1.40-RXN: (expasy) Alpha-L-rhamnosidase [3.2.1.40]	2.26873e-05	8.44906e-06	1.39206e-05	4.09373e-06	1.70974e-05	3.77176e-06	no
3.2.1.49-RXN: (expasy) Alpha-N-acetylgalactosaminidase [3.2.1.49]	3.27314e-05	2.04265e-06	2.11602e-06	2.2468e-06	6.49949e-06	2.64669e-07	no
3.2.1.50-RXN: (expasy) Alpha-N-acetylglucosaminidase [3.2.1.50]	2.302e-05	1.00218e-05	1.67095e-05	2.47797e-06	6.58678e-06	5.73523e-06	no
3.2.1.52-RXN: (expasy) Beta-N-acetylhexosaminidase [3.2.1.52]	0.000174554	0.000163416	0.000119225	9.10351e-05	0.000133726	0.000106264	no
3.2.1.55-RXN: (expasy) Non-reducing end alpha-L-arabinofuranosidase [3.2.1.55]	0.000521469	0.000287852	0.000202333	8.81809e-05	0.000160721	8.36811e-05	no
3.2.1.58-RXN: (expasy) Glucan 1,3-beta-glucosidase [3.2.1.58]	3.87855e-05	0	0	0	0	4.22914e-07	no
3.2.1.6-RXN: (expasy) Endo-1,3(4)-beta-glucanase [3.2.1.6]	0	8.31038e-08	1.10333e-06	2.66934e-07	0	0	no
3.2.1.64-RXN: (expasy) 2,6-beta-fructan 6-levanbiohydrolase [3.2.1.64]	2.91528e-07	3.54812e-05	4.56246e-06	1.46265e-05	5.27408e-06	4.27142e-06	no
3.2.1.68-RXN: (expasy) Isoamylase [3.2.1.68]	6.21776e-05	4.02924e-07	1.29305e-06	9.11216e-08	0	7.10687e-07	no
3.2.1.70-RXN: (expasy) Glucan 1,6-alpha-glucosidase [3.2.1.70]	3.10254e-07	2.48844e-07	8.7114e-07	9.75285e-06	3.74562e-06	5.13187e-07	no
3.2.1.73-RXN: (expasy) Licheninase [3.2.1.73]	6.88587e-06	3.0498e-05	6.65014e-06	3.3266e-06	4.1386e-06	4.07097e-07	no
3.2.1.74-RXN: (expasy) Glucan 1,4-beta-glucosidase [3.2.1.74]	0	2.74275e-06	0	8.86613e-07	0	2.44846e-06	no
3.2.1.78-RXN: (expasy) Mannan endo-1,4-beta-mannosidase [3.2.1.78]	1.42054e-05	1.26369e-05	1.88562e-05	3.42738e-05	4.79034e-06	4.50692e-06	no
3.2.1.8-RXN: (expasy) Endo-1,4-beta-xylanase [3.2.1.8]	0.000110715	0.000220116	0.000104744	9.04289e-05	7.72644e-05	8.50341e-05	no
3.2.1.80-RXN: (expasy) AMBIGUOUS [3.2.1.153; 3.2.1.80]	2.98718e-05	6.57026e-05	2.58253e-05	2.23189e-05	2.01429e-05	3.15659e-06	no
3.2.1.82-RXN: (expasy) Exo-poly-alpha-digalacturonosidase [3.2.1.82]	2.63058e-05	1.78357e-05	4.91027e-05	1.65844e-05	8.48241e-06	1.38842e-05	no
3.2.1.83-RXN: (expasy) Kappa-carrageenase [3.2.1.83]	2.84565e-05	2.9919e-05	1.31485e-05	2.1035e-05	8.66809e-06	1.15724e-05	no
3.2.1.89-RXN: (expasy) Arabinogalactan endo-beta-1,4-galactanase [3.2.1.89]	3.08692e-05	0.000124043	0.000144098	0.000155721	1.60483e-05	9.78971e-05	no
3.2.1.91-RXN: (expasy) Cellulose 1,4-beta-cellobiosidase (non-reducing end) [3.2.1.91]	2.34878e-05	4.80019e-05	3.23015e-05	1.90156e-05	3.46621e-05	3.54139e-05	no
3.2.1.94-RXN: (expasy) Glucan 1,6-alpha-isomaltosidase [3.2.1.94]	1.03079e-06	3.1758e-07	3.75844e-06	9.38747e-07	0	0	no
3.2.1.96-RXN: (expasy) Mannosyl-glycoprotein endo-beta-N-acetylglucosaminidase [3.2.1.96]	2.83572e-05	2.17239e-05	2.63295e-05	9.18156e-06	3.14601e-05	2.34545e-06	no
3.2.1.97-RXN: (expasy) Endo-alpha-N-acetylgalactosaminidase [3.2.1.97]	2.64607e-06	6.30154e-06	3.24407e-07	2.81377e-06	1.0769e-05	5.2434e-06	no
3.2.1.98-RXN: (expasy) Glucan 1,4-alpha-maltohexaosidase [3.2.1.98]	2.40387e-07	0	1.88647e-07	2.49834e-07	0	1.32275e-05	no
3.2.1.99-RXN: (expasy) Arabinan endo-1,5-alpha-L-arabinosidase [3.2.1.99]	0.000201074	6.4535e-05	4.10891e-05	3.85613e-05	1.31274e-05	7.01974e-06	no
3.2.2.10-RXN: (expasy) Pyrimidine-5'-nucleotide nucleosidase [3.2.2.10]	2.07005e-08	0	0	0	1.39145e-07	0	no
3.2.2.15-RXN: (expasy) DNA-deoxyinosine glycosylase [3.2.2.15]	1.26745e-06	4.22512e-06	3.2768e-05	3.37544e-05	6.30968e-06	1.00062e-05	no
3.2.2.21-RXN: (expasy) DNA-3-methyladenine glycosylase II [3.2.2.21]	4.99052e-05	5.6978e-05	3.24642e-05	2.16825e-05	4.82297e-05	6.35024e-05	no
3.2.2.23-RXN: (expasy) DNA-formamidopyrimidine glycosylase [3.2.2.23]	2.28733e-05	1.12227e-05	1.08532e-05	1.51299e-05	2.68589e-05	4.28788e-05	no
3.2.2.24-RXN: (expasy) ADP-ribosyl-[dinitrogen reductase] hydrolase [3.2.2.24]	2.20681e-07	0	2.49048e-06	2.37374e-06	5.50548e-06	2.69041e-06	no
3.3.2.10-RXN: (expasy) Soluble epoxide hydrolase [3.3.2.10]	4.23173e-06	1.2961e-05	8.73762e-06	1.35976e-05	1.14124e-05	1.5372e-05	no
3.4.11.1-RXN: (expasy) AMBIGUOUS [3.4.11.1; 3.4.11.9]	1.73583e-05	1.06649e-05	4.3496e-06	7.07005e-06	2.30083e-05	4.20922e-05	no
3.4.11.10-RXN: (expasy) Bacterial leucyl aminopeptidase [3.4.11.10]	1.95361e-05	1.7035e-05	9.75906e-06	8.73796e-06	2.07707e-05	2.09034e-05	no
3.4.11.18-RXN: (expasy) Methionyl aminopeptidase [3.4.11.18]	0.000310605	0.000334598	0.000328588	0.000354739	0.000303583	0.000294468	no
3.4.11.19-RXN: (expasy) D-stereospecific aminopeptidase [3.4.11.19]	1.14115e-07	0	0	0	4.12386e-06	0	no
3.4.11.2-RXN: (expasy) AMBIGUOUS [3.4.11.14; 3.4.11.2]	7.242e-05	7.11528e-06	6.25447e-06	1.08317e-05	1.05906e-05	6.05158e-05	no
3.4.11.24-RXN: (expasy) Aminopeptidase S [3.4.11.24]	9.49661e-07	6.05354e-07	5.03575e-06	4.39695e-07	3.25838e-06	1.43961e-05	no
3.4.11.4-RXN: (expasy) Tripeptide aminopeptidase [3.4.11.4]	0.000139929	0.000191165	0.000188839	0.000160095	0.000177537	0.000162235	no
3.4.11.5-RXN: (expasy) Prolyl aminopeptidase [3.4.11.5]	2.46619e-05	2.74062e-05	1.53017e-05	3.59964e-05	3.65651e-05	1.7256e-05	no
3.4.11.6-RXN: (expasy) Aminopeptidase B [3.4.11.6]	4.59579e-05	9.73526e-05	4.03158e-05	4.28196e-05	4.97402e-05	2.78105e-05	no
3.4.11.7-RXN: (expasy) Glutamyl aminopeptidase [3.4.11.7]	8.15852e-06	2.78952e-05	7.15161e-06	3.96923e-05	3.08524e-05	1.31718e-05	no
3.4.11.9-RXN: (expasy) Xaa-Pro aminopeptidase [3.4.11.9]	2.15443e-05	5.33759e-05	3.32294e-05	3.58412e-05	2.82279e-05	5.28844e-05	no
3.4.13.18-RXN: (expasy) Cytosol nonspecific dipeptidase [3.4.13.18]	0.000115572	9.02416e-05	5.32951e-05	4.52587e-05	6.47177e-05	8.17548e-05	no
3.4.13.19-RXN: (expasy) Membrane dipeptidase [3.4.13.19]	7.66125e-07	2.31957e-06	1.13057e-06	1.02648e-06	5.0287e-06	5.08001e-06	no
3.4.13.20-RXN: (expasy) Beta-Ala-His dipeptidase [3.4.13.20]	1.15256e-05	4.41507e-06	4.46799e-06	1.20483e-05	7.18221e-06	2.57485e-06	no
3.4.13.21-RXN: (expasy) Dipeptidase E [3.4.13.21]	1.98876e-06	1.19764e-06	2.07063e-06	2.80569e-06	1.69486e-06	2.74547e-05	no
3.4.13.22-RXN: (expasy) D-Ala-D-Ala dipeptidase [3.4.13.22]	5.16381e-05	2.60255e-05	1.77631e-05	1.99982e-05	3.43948e-05	2.24718e-05	no
3.4.13.9-RXN: (expasy) Xaa-Pro dipeptidase [3.4.13.9]	2.27727e-05	6.82224e-05	4.00578e-05	2.92188e-05	6.14663e-05	7.99342e-05	no
3.4.14.11-RXN: (expasy) Xaa-Pro dipeptidyl-peptidase [3.4.14.11]	7.16768e-06	4.06163e-06	3.27091e-06	2.02157e-05	2.52093e-05	1.31901e-05	no
3.4.14.12-RXN: (expasy) Xaa-Xaa-Pro tripeptidyl-peptidase [3.4.14.12]	5.38372e-05	4.50805e-05	4.10128e-05	2.23589e-05	5.3286e-05	8.56744e-06	no
3.4.14.4-RXN: (expasy) Dipeptidyl-peptidase III [3.4.14.4]	8.79459e-06	1.33348e-06	2.88006e-06	6.023e-07	1.14688e-06	1.79196e-07	no
3.4.14.5-RXN: (expasy) Dipeptidyl-peptidase IV [3.4.14.5]	1.16612e-05	1.15289e-06	5.17837e-06	4.69121e-06	1.47481e-06	8.00571e-08	no
3.4.15.5-RXN: (expasy) Peptidyl-dipeptidase Dcp [3.4.15.5]	3.04067e-05	2.31005e-05	3.12385e-05	5.98154e-06	2.64354e-05	5.68965e-05	no
3.4.15.6-RXN: (expasy) Cyanophycinase [3.4.15.6]	0	0	0	0	0	1.00501e-06	no
3.4.16.4-RXN: (expasy) Serine-type D-Ala-D-Ala carboxypeptidase [3.4.16.4]	0.000273883	0.000514879	0.000330431	0.000283636	0.000432615	0.000483868	no
3.4.17.11-RXN: (expasy) Glutamate carboxypeptidase [3.4.17.11]	4.95554e-07	2.84804e-06	5.21797e-06	2.24036e-06	1.43604e-05	8.08183e-07	no
3.4.17.13-RXN: (expasy) Muramoyltetrapeptide carboxypeptidase [3.4.17.13]	1.77412e-05	1.61196e-05	1.06295e-05	2.68996e-05	2.52457e-05	4.49866e-05	no
3.4.17.14-RXN: (expasy) Zinc D-Ala-D-Ala carboxypeptidase [3.4.17.14]	3.08902e-06	1.92838e-05	1.51368e-05	1.11857e-05	6.99118e-06	1.92509e-05	no
3.4.17.18-RXN: (expasy) Carboxypeptidase T [3.4.17.18]	1.53619e-06	0	0	0	0	0	no
3.4.17.19-RXN: (expasy) Carboxypeptidase Taq [3.4.17.19]	6.20053e-06	2.27897e-05	1.12766e-05	2.91159e-05	2.07571e-05	2.56911e-05	no
3.4.17.8-RXN: (expasy) AMBIGUOUS [3.4.16.4; 3.4.17.8]	0.000273883	0.000514879	0.000330431	0.000283636	0.000432615	0.000483868	no
3.4.19.11-RXN: (expasy) Gamma-D-glutamyl-meso-diaminopimelate peptidase [3.4.19.11]	1.15779e-05	5.27984e-05	6.50066e-05	6.43406e-05	5.26179e-05	2.84508e-05	no
3.4.19.5-RXN: (expasy) Beta-aspartyl-peptidase [3.4.19.5]	1.94663e-07	0	0	0	0	2.07983e-05	no
3.4.21.102-RXN: (expasy) C-terminal processing peptidase [3.4.21.102]	5.02812e-05	6.52192e-05	7.23946e-05	5.60752e-05	7.77797e-05	8.16747e-05	no
3.4.21.105-RXN: (expasy) Rhomboid protease [3.4.21.105]	0.000104113	0.000124897	7.97182e-05	6.78278e-05	5.82269e-05	7.83943e-05	no
3.4.21.107-RXN: (expasy) Peptidase Do [3.4.21.107]	4.81632e-05	0.000123951	6.56482e-05	4.47675e-05	9.82344e-05	0.000192537	no
3.4.21.108-RXN: (expasy) HtrA2 peptidase [3.4.21.108]	7.85244e-07	1.29004e-06	4.18944e-06	8.8114e-07	1.37133e-06	2.02503e-07	no
3.4.21.110-RXN: (expasy) C5a peptidase [3.4.21.110]	5.12792e-07	0	0	8.0687e-07	2.31542e-06	9.22337e-08	no
3.4.21.116-RXN: (expasy) SpoIVB peptidase [3.4.21.116]	2.1543e-05	7.11564e-05	4.97884e-05	4.9573e-05	3.73106e-05	4.25585e-05	no
3.4.21.19-RXN: (expasy) Glutamyl endopeptidase [3.4.21.19]	0	0	1.52897e-06	2.4291e-07	0	0	no
3.4.21.26-RXN: (expasy) Prolyl oligopeptidase [3.4.21.26]	6.21169e-08	2.38482e-07	1.5787e-07	1.01421e-07	2.78815e-06	0	no
3.4.21.48-RXN: (expasy) Cerevisin [3.4.21.48]	0	1.68967e-06	0	0	0	0	no
3.4.21.53-RXN: (expasy) Endopeptidase La [3.4.21.53]	0.00023496	0.000267572	0.000206965	0.000220785	0.000218392	0.000224024	no
3.4.21.62-RXN: (expasy) Subtilisin [3.4.21.62]	1.23961e-06	1.32868e-05	1.13915e-05	1.0394e-05	7.37702e-07	7.70358e-06	no
3.4.21.66-RXN: (expasy) Thermitase [3.4.21.66]	0	1.69533e-07	8.31081e-07	1.97989e-07	0	2.66594e-07	no
3.4.21.83-RXN: (expasy) Oligopeptidase B [3.4.21.83]	1.02111e-07	1.72128e-06	6.60139e-07	3.63414e-06	2.08362e-07	5.34261e-05	no
3.4.21.87-RXN: (expasy) Omptin [3.4.23.49]	0	0	0	0	0	3.1628e-05	no
3.4.21.88-RXN: (expasy) Repressor LexA [3.4.21.88]	0.000263109	0.000233088	0.000209019	0.000316895	0.00020181	0.000211366	no
3.4.21.89-RXN: (expasy) Signal peptidase I [3.4.21.89]	0.000451926	0.000487335	0.000487864	0.000483523	0.000454883	0.000388991	no
3.4.21.92-RXN: (expasy) Endopeptidase Clp [3.4.21.92]	0.000341593	0.000212834	0.000182286	0.000226204	0.000227788	0.000197659	no
3.4.21.96-RXN: (expasy) Lactocepin [3.4.21.96]	5.14799e-06	1.02115e-05	1.42903e-06	9.26924e-06	1.97511e-06	5.99417e-06	no
3.4.22.10-RXN: (expasy) Streptopain [3.4.22.10]	2.5591e-06	2.55779e-06	2.14681e-06	1.69751e-06	1.52914e-06	2.46548e-07	no
3.4.22.34-RXN: (expasy) Legumain [3.4.22.34]	0	0	0	0	0	0	no
3.4.22.37-RXN: (expasy) Gingipain R [3.4.22.37]	1.32762e-06	0	1.57438e-06	0	0	0	no
3.4.22.40-RXN: (expasy) Bleomycin hydrolase [3.4.22.40]	8.30381e-05	7.42845e-06	4.03786e-06	1.09413e-05	1.90839e-05	3.01116e-06	no
3.4.22.8-RXN: (expasy) Clostripain [3.4.22.8]	3.33504e-06	2.53307e-06	4.6596e-06	1.77276e-06	2.64521e-06	2.38701e-07	no
3.4.23.43-RXN: (expasy) Prepilin peptidase [3.4.23.43]	1.48841e-06	5.73055e-06	2.22161e-05	2.99335e-05	5.89716e-06	9.58921e-06	no
3.4.24.11-RXN: (expasy) Neprilysin [3.4.24.11]	0	0	0	0	1.0192e-07	1.759e-07	no
3.4.24.13-RXN: (expasy) IgA-specific metalloendopeptidase [3.4.24.13]	3.44324e-07	9.27536e-07	0	3.08066e-06	1.83154e-06	3.07902e-07	no
3.4.24.15-RXN: (expasy) Thimet oligopeptidase [3.4.24.15]	0	0	0	1.94629e-07	1.5479e-07	1.76048e-07	yes
3.4.24.3-RXN: (expasy) Microbial collagenase [3.4.24.3]	0	0	2.4777e-07	2.9153e-07	1.74408e-07	0	no
3.4.24.30-RXN: (expasy) Coccolysin [3.4.24.30]	0	0	0	0	2.70312e-06	0	no
3.4.24.32-RXN: (expasy) AMBIGUOUS [3.4.24.32; 3.5.1.28]	2.13605e-07	0	0	0	2.0209e-07	1.71309e-05	no
3.4.24.55-RXN: (expasy) Pitrilysin [3.4.24.55]	1.03656e-05	5.24343e-06	6.18352e-06	4.62347e-06	1.49832e-05	6.02097e-05	no
3.4.24.57-RXN: (expasy) O-sialoglycoprotein endopeptidase [3.4.24.57]	6.34151e-07	2.71218e-06	8.11854e-08	7.30373e-06	6.04127e-06	1.89554e-06	no
3.4.24.64-RXN: (expasy) Mitochondrial processing peptidase [3.4.24.64]	0	0	2.28709e-07	0	1.05645e-07	0	no
3.4.24.70-RXN: (expasy) Oligopeptidase A [3.4.24.70]	1.20976e-06	1.3681e-06	4.28473e-06	2.11679e-07	1.10882e-06	8.82478e-05	no
3.4.24.71-RXN: (expasy) Endothelin-converting enzyme 1 [3.4.24.71]	1.23705e-05	9.78789e-06	1.62697e-05	3.18527e-06	6.0171e-06	3.22576e-06	no
3.4.24.75-RXN: (expasy) Lysostaphin [3.4.24.75]	8.98377e-06	2.4096e-05	1.50541e-05	1.2121e-05	2.03827e-05	2.84679e-05	no
3.4.24.83-RXN: (expasy) Anthrax lethal factor endopeptidase [3.4.24.83]	2.01105e-06	0	0	0	0	0	no
3.4.25.1-RXN: (expasy) Proteasome endopeptidase complex [3.4.25.1]	7.91013e-08	0	0	1.73295e-05	1.17032e-05	4.58318e-08	no
3.5.1.26-RXN: (expasy) N(4)-(beta-N-acetylglucosaminyl)-L-asparaginase [3.5.1.26]	1.72346e-06	0	0	5.1718e-07	5.96743e-07	2.66437e-07	no
3.5.1.27-RXN: (expasy) Peptide deformylase [3.5.1.88]	0.000365862	0.00036356	0.00033783	0.000400246	0.000351532	0.00029834	no
3.5.1.52-RXN: (expasy) Peptide-N(4)-(N-acetyl-beta-glucosaminyl)asparagine amidase [3.5.1.52]	0	2.05488e-06	0	0	2.64899e-07	0	no
3.5.1.77-RXN: (expasy) N-carbamoyl-D-amino-acid hydrolase [3.5.1.77]	1.24895e-05	2.2743e-05	1.35213e-05	1.04368e-05	8.74223e-06	1.1876e-05	no
3.5.1.80-RXN: (expasy) N-acetylglucosamine-6-phosphate deacetylase [3.5.1.25]	0.000123724	0.000140808	0.00015554	7.7e-05	8.38645e-05	0.000165533	no
3.5.1.81-RXN: (expasy) N-acyl-D-amino-acid deacylase [3.5.1.81]	7.86177e-07	9.6794e-07	1.34481e-06	1.1214e-06	1.0482e-06	1.19514e-05	no
3.5.1.82-RXN: (expasy) N-acyl-D-glutamate deacylase [3.5.1.82]	5.63879e-06	9.24855e-06	1.06206e-06	7.67806e-06	8.33808e-07	8.50261e-06	no
3.5.1.86-RXN: (expasy) Mandelamide amidase [3.5.1.86]	8.64715e-08	5.87943e-08	0	0	5.40931e-07	0	no
3.5.1.87-RXN: (expasy) N-carbamoyl-L-amino-acid hydrolase [3.5.1.87]	9.11113e-06	1.90823e-05	1.01091e-05	5.65814e-06	3.57725e-06	2.59904e-06	no
3.5.1.88-RXN: (expasy) Peptide deformylase [3.5.1.88]	0.000365862	0.00036356	0.00033783	0.000400246	0.000351532	0.00029834	no
3.5.1.91-RXN: (expasy) N-substituted formamide deformylase [3.5.1.91]	1.98227e-05	1.04328e-05	1.96112e-05	3.30338e-05	2.7362e-05	3.86449e-05	no
3.5.2.12-RXN: (expasy) 6-aminohexanoate-cyclic-dimer hydrolase [3.5.2.12]	6.43856e-08	0	0	9.42444e-06	9.66113e-06	3.06642e-07	no
3.5.2.14-RXN: (expasy) N-methylhydantoinase (ATP-hydrolyzing) [3.5.2.14]	2.58091e-06	5.11259e-07	0	1.07877e-06	1.50712e-06	0	no
3.5.2.17-RXN: (expasy) Hydroxyisourate hydrolase [3.5.2.17]	0	0	0	0	3.48469e-07	1.59069e-05	no
3.5.2.18-RXN: (expasy) Enamidase [3.5.2.18]	0	0	0	0	0	0	no
3.5.3.22-RXN: (expasy) Proclavaminate amidinohydrolase [3.5.3.22]	0	0	1.49382e-07	6.74121e-06	7.53116e-07	0	no
3.5.4.27-RXN: (expasy) Methenyltetrahydromethanopterin cyclohydrolase [3.5.4.27]	0	0	0	6.63404e-06	5.89017e-06	0	no
3.5.4.30-RXN: (expasy) dCTP deaminase (dUMP-forming) [3.5.4.30]	8.31585e-05	5.92742e-06	3.39921e-06	2.16415e-05	2.29213e-05	3.40996e-06	no
3.5.5.1-RXN: (expasy) Nitrilase [3.5.5.1]	2.91709e-07	0	4.25802e-07	3.20349e-07	0	0	no
3.5.5.4-RXN: (expasy) Cyanoalanine nitrilase [3.5.5.4]	0	0	0	0	0	1.1168e-05	no
3.5.5.7-RXN: (expasy) Aliphatic nitrilase [3.5.5.7]	0	1.98611e-07	2.04677e-06	3.27897e-07	2.40775e-06	0	no
3.5.99.5-RXN: (expasy) 2-aminomuconate deaminase [3.5.99.5]	0	0	1.86012e-06	8.44983e-07	0	0	no
3.6.1.17-RXN: (expasy) Bis(5'-nucleosyl)-tetraphosphatase (asymmetrical) [3.6.1.17]	1.9413e-07	0	0	7.17488e-07	1.0056e-05	5.73226e-07	no
3.6.1.41-RXN: (expasy) Bis(5'-nucleosyl)-tetraphosphatase (symmetrical) [3.6.1.41]	1.58197e-07	3.18654e-06	1.62609e-06	1.00255e-05	5.1456e-06	3.73193e-05	no
3.6.3.15-RXN: (expasy) Na(+)-transporting two-sector ATPase [7.2.2.1]	0	0	0	0	6.57338e-07	0	no
3.6.3.21-RXN: (expasy) ABC-type polar-amino-acid transporter [7.4.2.1]	0	0	0	1.83177e-08	0	2.62239e-06	no
3.6.3.28-RXN: (expasy) ABC-type phosphonate transporter [7.3.2.2]	1.72066e-05	1.92761e-05	5.2157e-06	2.138e-05	1.37508e-05	2.50726e-05	no
3.6.3.30-RXN: (expasy) ABC-type Fe(3+) transporter [7.2.2.7]	0	0	0	7.23148e-08	0	0	no
3.6.3.35-RXN: (expasy) ABC-type Mn(2+) transporter [7.2.2.5]	0	0	0	5.22353e-07	0	4.8427e-08	no
3.6.3.40-RXN: (expasy) ABC-type teichoic-acid transporter [7.5.2.4]	0	4.44064e-08	0	3.75694e-08	5.20862e-07	0	no
3.6.3.41-RXN: (expasy) ABC-type heme transporter [7.6.2.5]	0	0	0	0	0	1.14966e-06	no
3.6.3.44-RXN: (expasy) ABC-type xenobiotic transporter [7.6.2.2]	1.96209e-08	0	0	0	0	5.7451e-06	no
3.6.4.6-RXN: (expasy) Vesicle-fusing ATPase [3.6.4.6]	2.16231e-05	0	0	0	0	0	no
3.7.1.8-RXN: (expasy) 2,6-dioxo-6-phenylhexa-3-enoate hydrolase [3.7.1.8]	2.46489e-06	0	0	1.64776e-06	7.69717e-07	0	no
3.7.1.9-RXN: (expasy) 2-hydroxymuconate-6-semialdehyde hydrolase [3.7.1.9]	0	0	0	0	0	0	no
3.8.1.7-RXN: (expasy) 4-chlorobenzoyl-CoA dehalogenase [3.8.1.7]	5.87214e-08	0	0	5.63233e-07	1.22477e-07	6.66473e-06	no
3.8.1.8-RXN: (expasy) Atrazine chlorohydrolase [3.8.1.8]	1.47246e-06	9.31271e-07	8.29938e-07	1.44816e-06	2.94883e-06	9.69098e-07	no
325-BISPHOSPHATE-NUCLEOTIDASE-RXN: (expasy) 3'(2'),5'-bisphosphate nucleotidase [3.1.3.7]	2.36983e-05	1.70376e-05	2.5246e-05	8.90948e-06	2.29408e-05	2.51556e-05	no
3OHSTEROXRED-RXN: (expasy) 3-alpha-hydroxybile acid CoA 3-dehydrogenase [1.1.1.395]	0	2.92881e-07	0	1.37668e-07	3.8089e-06	1.44829e-07	no
3PGAREARR-RXN: (expasy) Phosphoglycerate mutase (2,3-diphosphoglycerate-independent) [5.4.2.12]	0.000131343	0.000172014	0.000177182	0.000184788	0.000170727	0.00014643	no
4-CARBOXYMUCONOLACTONE-DECARBOXYLASE-RXN: (expasy) 4-carboxymuconolactone decarboxylase [4.1.1.44]	7.55329e-06	2.17142e-07	2.679e-07	8.05041e-07	4.07491e-06	8.52394e-07	no
4-COUMARATE--COA-LIGASE-RXN: (expasy) 4-coumarate--CoA ligase [6.2.1.12]	0	5.62916e-07	0	0	1.03104e-07	0	no
4-HYDROXY-2-KETOPIMELATE-LYSIS-RXN: (expasy) 4-hydroxy-2-oxoheptanedioate aldolase [4.1.2.52]	0	0	0	0	7.01843e-08	1.37415e-05	no
4-HYDROXYBENZOATE--COA-LIGASE-RXN: (expasy) 4-hydroxybenzoate--CoA ligase [6.2.1.27]	2.43757e-07	2.26575e-06	1.2995e-06	4.99449e-07	3.50369e-07	1.26595e-05	no
4-HYDROXYBENZOATE-3-MONOOXYGENASE-RXN: (expasy) 4-hydroxybenzoate 3-monooxygenase [1.14.13.2]	0	0	0	0	0	0	no
4-HYDROXYBENZOATE-DECARBOXYLASE-RXN: (expasy) 4-hydroxybenzoate decarboxylase [4.1.1.61]	9.78114e-09	7.28165e-08	0	0	2.30868e-07	6.43989e-06	no
4-HYDROXYBUTYRATE-DEHYDROGENASE-RXN: (expasy) 4-hydroxybutyrate dehydrogenase [1.1.1.61]	1.43362e-06	2.18309e-07	0	0	3.73694e-07	5.59554e-07	no
4-HYDROXYPHENYLPYRUVATE-DIOXYGENASE-RXN: (expasy) 4-hydroxyphenylpyruvate dioxygenase [1.13.11.27]	3.32016e-07	0	0	0	0	1.00339e-06	no
4-NITROPHENYLPHOSPHATASE-RXN: (expasy) 4-nitrophenylphosphatase [3.1.3.41]	2.67691e-07	2.55223e-07	6.34549e-07	4.35568e-06	3.59484e-07	6.76734e-06	no
4-PYRIDOXOLACTONASE-RXN: (expasy) 4-pyridoxolactonase [3.1.1.27]	2.57261e-06	5.2513e-06	1.46778e-06	1.49451e-06	2.14205e-07	0	no
4.1.1.32-RXN: (expasy) Phosphoenolpyruvate carboxykinase (GTP) [4.1.1.32]	5.13799e-06	2.08189e-06	1.13281e-05	2.38599e-05	4.57838e-05	1.47505e-05	no
4.1.1.38-RXN: (expasy) Phosphoenolpyruvate carboxykinase (diphosphate) [4.1.1.38]	0	0	0	1.07936e-07	0	0	no
4.1.1.64-RXN: (expasy) 2,2-dialkylglycine decarboxylase (pyruvate) [4.1.1.64]	1.53283e-07	1.75335e-06	0	0	4.06584e-06	6.72894e-07	no
4.1.1.68-RXN: (expasy) 5-oxopent-3-ene-1,2,5-tricarboxylate decarboxylase [4.1.1.68]	0	0	0	0	0	5.20104e-05	no
4.1.1.74-RXN: (expasy) Indolepyruvate decarboxylase [4.1.1.74]	0	0	0	0	1.04855e-07	0	no
4.1.1.76-RXN: (expasy) Arylmalonate decarboxylase [4.1.1.76]	2.75091e-07	1.51329e-07	0	0	6.50867e-07	0	no
4.1.1.77-RXN: (expasy) 2-oxo-3-hexenedioate decarboxylase [4.1.1.77]	0	0	0	0	0	3.20491e-06	no
4.1.1.81-RXN: (expasy) Threonine-phosphate decarboxylase [4.1.1.81]	2.43437e-05	8.60958e-05	4.87276e-05	4.25326e-05	4.80789e-05	4.0493e-05	no
4.1.1.82-RXN: (expasy) Phosphonopyruvate decarboxylase [4.1.1.82]	2.52338e-06	1.91654e-06	1.6689e-06	7.84879e-07	2.54397e-06	6.08068e-06	no
4.1.1.83-RXN: (expasy) 4-hydroxyphenylacetate decarboxylase [4.1.1.83]	4.47706e-05	9.82986e-05	4.90641e-05	3.15109e-05	9.36551e-05	9.38969e-05	no
4.1.1.86-RXN: (expasy) Diaminobutyrate decarboxylase [4.1.1.86]	5.71685e-07	0	0	1.9106e-06	5.84054e-07	0	no
4.1.2.20-RXN: (expasy) 2-dehydro-3-deoxyglucarate aldolase [4.1.2.20]	2.21142e-06	4.89821e-06	6.18066e-08	7.61757e-08	2.05721e-06	4.74433e-05	no
4.1.2.28-RXN: (expasy) 2-dehydro-3-deoxy-D-pentonate aldolase [4.1.2.28]	6.07402e-08	0	0	0	8.98361e-08	1.58326e-07	no
4.1.2.29-RXN: (expasy) 5-dehydro-2-deoxyphosphogluconate aldolase [4.1.2.29]	1.83189e-06	2.20971e-07	6.40159e-07	1.50235e-06	2.90569e-06	3.21651e-06	no
4.1.2.42-RXN: (expasy) D-threonine aldolase [4.1.2.42]	1.99009e-06	1.16414e-06	2.22325e-06	2.0096e-07	6.17193e-07	8.56366e-06	no
4.1.3.17-RXN: (expasy) 4-hydroxy-4-methyl-2-oxoglutarate aldolase [4.1.3.17]	0	2.80526e-07	6.1505e-08	2.84737e-08	4.50751e-07	7.43434e-06	no
4.1.99.4-RXN: (expasy) 1-aminocyclopropane-1-carboxylate deaminase [3.5.99.7]	0	0	0	6.03936e-08	1.58874e-07	0	no
4.2.1.103-RXN: (expasy) Cyclohexyl-isocyanide hydratase [4.2.1.103]	1.29368e-06	0	0	0	0	0	no
4.2.1.107-RXN: (expasy) hydratase [4.2.1.107]	3.54778e-06	1.95354e-06	7.61401e-07	2.07998e-06	4.77825e-06	3.34032e-07	no
4.2.1.43-RXN: (expasy) 2-dehydro-3-deoxy-L-arabinonate dehydratase [4.2.1.43]	1.79096e-06	0	0	0	0	0	no
4.2.1.58-RXN: (metacyc) (3R)-3-hydroxybutanoyl-[acyl-carrier-protein] hydratase [4.2.1.59]	0.000169373	0.000197021	0.000186766	0.000152731	0.000172071	0.000184341	no
4.2.1.59-RXN: (expasy) 3-hydroxyacyl-[acyl-carrier-protein] dehydratase [4.2.1.59]	0.000169373	0.000197021	0.000186766	0.000152731	0.000172071	0.000184341	no
4.2.1.61-RXN: (expasy) 3-hydroxyacyl-[acyl-carrier-protein] dehydratase [4.2.1.59]	0.000169373	0.000197021	0.000186766	0.000152731	0.000172071	0.000184341	no
4.2.1.99-RXN: (expasy) 2-methylisocitrate dehydratase [4.2.1.99]	1.53931e-08	0	0	3.34467e-07	1.75589e-07	1.05708e-05	no
4.2.2.12-RXN: (expasy) Xanthan lyase [4.2.2.12]	1.13933e-06	2.06861e-06	4.73495e-06	2.80129e-07	1.61508e-06	1.27714e-06	no
4.2.2.17-RXN: (expasy) Inulin fructotransferase (DFA-I-forming) [4.2.2.17]	0	3.381e-05	2.94142e-06	3.27166e-06	3.50042e-05	7.40319e-07	no
4.2.2.2-RXN: (expasy) Pectate lyase [4.2.2.2]	2.09187e-05	4.61583e-06	5.0314e-06	3.36637e-06	3.07149e-06	1.41573e-06	no
4.2.2.21-RXN: (expasy) Chondroitin-sulfate-ABC exolyase [4.2.2.21]	2.42885e-06	8.44103e-07	5.70689e-07	3.15255e-07	8.20351e-07	0	no
4.2.2.22-RXN: (expasy) Pectate trisaccharide-lyase [4.2.2.22]	2.87559e-06	2.9676e-07	4.66228e-06	7.61811e-07	1.06476e-06	1.56276e-06	no
4.2.2.3-RXN: (expasy) Mannuronate-specific alginate lyase [4.2.2.3]	0	0	0	0	2.29765e-07	0	no
4.2.2.5-RXN: (expasy) AMBIGUOUS [4.2.2.20; 4.2.2.5]	4.25947e-06	3.03501e-06	5.25581e-06	3.42605e-06	3.05081e-06	1.43711e-06	no
4.2.2.7-RXN: (expasy) Heparin lyase [4.2.2.7]	1.23712e-05	3.03798e-06	7.39868e-06	7.65811e-07	3.04652e-06	1.07901e-06	no
4.2.2.8-RXN: (expasy) Heparin-sulfate lyase [4.2.2.8]	6.35723e-06	1.9005e-06	8.16088e-06	1.38241e-06	1.36407e-05	2.55187e-06	no
4.2.2.9-RXN: (expasy) Pectate disaccharide-lyase [4.2.2.9]	1.71961e-06	2.68565e-07	2.60118e-06	3.47936e-06	0	1.73587e-07	no
4.2.3.12-RXN: (expasy) 6-pyruvoyltetrahydropterin synthase [4.2.3.12]	6.62999e-07	5.02521e-07	4.09452e-07	2.10145e-06	5.281e-07	5.80628e-06	no
4.2.99.18-RXN: (expasy) DNA-(apurinic or apyrimidinic site) lyase [4.2.99.18]	0.000270527	0.000227138	0.000221174	0.00026105	0.000287431	0.000241314	no
4.2.99.19-RXN: (expasy) 2-hydroxypropyl-CoM lyase [4.4.1.23]	0	0	0	0	0	0	no
4.3.1.14-RXN: (expasy) 3-aminobutyryl-CoA ammonia-lyase [4.3.1.14]	0	0	0	1.76163e-07	7.1797e-07	0	no
4.3.1.15-RXN: (expasy) Diaminopropionate ammonia-lyase [4.3.1.15]	3.17702e-05	4.52461e-05	2.14798e-05	2.8942e-05	4.20593e-05	6.479e-05	no
4.3.1.17-RXN: (expasy) L-serine ammonia-lyase [4.3.1.17]	0.000190867	0.000276819	0.000238767	0.000150533	0.000165955	0.000267725	no
4.3.1.4-RXN: (expasy) Formimidoyltetrahydrofolate cyclodeaminase [4.3.1.4]	9.61232e-06	6.01336e-06	1.24489e-05	2.22974e-06	2.27004e-06	4.48518e-06	no
4.4.1.19-RXN: (expasy) Phosphosulfolactate synthase [4.4.1.19]	0	0	0	0	0	0	no
4.4.1.25-RXN: (expasy) L-cysteate sulfo-lyase [4.4.1.25]	0	9.12587e-08	0	0	8.52687e-08	0	no
4.99.1.3-RXN: (expasy) Sirohydrochlorin cobaltochelatase [4.99.1.3]	4.85344e-05	8.53775e-05	6.1317e-05	4.89103e-05	8.40113e-05	5.76233e-05	no
4OH2OXOGLUTARALDOL-RXN: (expasy) 4-hydroxy-2-oxoglutarate aldolase [4.1.3.16]	1.1968e-05	1.01972e-05	4.0159e-05	1.86154e-05	2.05777e-05	4.41534e-05	no
5-AMINOPENTANAMIDASE-RXN: (expasy) 5-aminopentanamidase [3.5.1.30]	9.55037e-08	0	0	0	4.84733e-07	0	no
5-DEHYDRO-2-DEOXYGLUCONOKINASE-RXN: (expasy) 5-dehydro-2-deoxygluconokinase [2.7.1.92]	8.00577e-05	0.000133199	0.000167502	0.000105406	0.000100451	0.000113538	no
5-FORMYL-THF-CYCLO-LIGASE-RXN: (expasy) 5-formyltetrahydrofolate cyclo-ligase [6.3.3.2]	0.000194962	0.000168661	0.000163168	0.000169998	0.000171453	0.000138278	no
5-METHYLTHIOADENOSINE-PHOSPHORYLASE-RXN: (expasy) S-methyl-5'-thioadenosine phosphorylase [2.4.2.28]	0	2.19848e-07	0	0	1.14884e-07	1.17036e-07	no
5-METHYLTHIORIBOSE-KINASE-RXN: (expasy) S-methyl-5-thioribose kinase [2.7.1.100]	5.83642e-06	1.34688e-05	7.14724e-06	6.0314e-06	2.99054e-05	1.04406e-05	no
5-NUCLEOTID-RXN: (expasy) 5'-nucleotidase [3.1.3.5]	0.000145624	0.000130384	0.000101405	9.58422e-05	0.000110895	0.000165792	no
5-OXOPROLINASE-ATP-HYDROLYSING-RXN: (expasy) 5-oxoprolinase (ATP-hydrolyzing) [3.5.2.9]	1.5246e-05	9.14238e-05	4.06994e-05	2.84575e-05	6.8142e-05	7.22047e-05	no
5.1.1.11-RXN: (expasy) Phenylalanine racemase (ATP-hydrolyzing) [5.1.1.11]	1.56335e-07	0	1.7657e-07	0	0	0	no
5.1.2.3-RXN: (expasy) 3-hydroxybutyryl-CoA epimerase [5.1.2.3]	1.17756e-07	0	0	5.9905e-08	2.86559e-07	1.19952e-05	no
5.1.3.20-RXN: (expasy) ADP-glyceromanno-heptose 6-epimerase [5.1.3.20]	7.98663e-06	7.41343e-06	1.57791e-06	5.59116e-06	2.01259e-05	4.96278e-05	no
5.1.3.21-RXN: (expasy) Maltose epimerase [5.1.3.21]	1.03538e-05	0	0	0	9.02712e-06	0	no
5.1.3.23-RXN: (expasy) UDP-2,3-diacetamido-2,3-dideoxyglucuronic acid 2-epimerase [5.1.3.23]	7.26292e-07	1.17954e-06	2.43475e-06	1.24184e-06	5.24198e-07	1.10722e-06	no
5.1.3.9-RXN: (expasy) N-acylglucosamine-6-phosphate 2-epimerase [5.1.3.9]	0.000127168	8.5623e-05	5.66805e-05	2.28053e-05	7.13646e-05	0.000120578	no
5.3.1.17-RXN: (expasy) 5-dehydro-4-deoxy-D-glucuronate isomerase [5.3.1.17]	5.88204e-05	6.70154e-05	0.000148847	6.17598e-05	7.49491e-05	6.50303e-05	no
5.3.1.23-RXN: (expasy) S-methyl-5-thioribose-1-phosphate isomerase [5.3.1.23]	1.99405e-05	1.50206e-05	1.30847e-05	2.41915e-05	4.86545e-05	9.99832e-06	no
5.3.3.10-RXN: (expasy) 5-carboxymethyl-2-hydroxymuconate Delta-isomerase [5.3.3.10]	0	0	0	1.63334e-07	0	2.44166e-05	no
5.3.3.14-RXN: (expasy) Trans-2-decenoyl-[acyl-carrier-protein] isomerase [5.3.3.14]	7.73345e-08	3.81971e-07	0	4.16129e-07	2.95641e-06	1.39202e-05	no
5.3.4.1-RXN: (expasy) Protein disulfide-isomerase [5.3.4.1]	0	0	0	1.87403e-06	7.53812e-06	4.00751e-07	no
5.4.1.2-RXN: (expasy) Precorrin-8X methylmutase [5.4.99.61]	4.38219e-06	8.51709e-06	1.12298e-05	1.51407e-05	2.55844e-05	1.42658e-05	no
5.4.2.10-RXN: (expasy) Phosphoglucosamine mutase [5.4.2.10]	0.000206781	0.00020335	0.000256194	0.000250269	0.000186451	0.00030231	no
5.4.99.15-RXN: (expasy) (1->4)-alpha-D-glucan 1-alpha-D-glucosylmutase [5.4.99.15]	0	0	0	0	0	0	no
5.4.99.16-RXN: (expasy) Maltose alpha-D-glucosyltransferase [5.4.99.16]	0	3.24208e-07	1.51022e-06	1.24175e-06	0	3.05079e-07	no
5.5.1.2-RXN: (expasy) 3-carboxy-cis,cis-muconate cycloisomerase [5.5.1.2]	0	0	1.28666e-07	1.39224e-07	0	0	no
5.99.1.2-RXN: (expasy) DNA topoisomerase [5.6.2.1]	1.10229e-08	0	0	0	1.02307e-07	2.74388e-06	no
5.99.1.3-RXN: (expasy) DNA topoisomerase (ATP-hydrolyzing) [5.6.2.2]	0	5.08535e-07	0	0	7.76246e-08	4.58574e-06	no
6-CARBOXYHEXANOATE--COA-LIGASE-RXN: (expasy) 6-carboxyhexanoate--CoA ligase [6.2.1.14]	2.52886e-06	4.17233e-06	1.38963e-06	6.72907e-06	2.44161e-06	6.36223e-08	no
6-HYDROXYNICOTINATE-REDUCTASE-RXN: (expasy) 6-hydroxynicotinate reductase [1.3.7.1]	0	0	7.18197e-08	0	2.82547e-07	0	no
6-PHOSPHO-BETA-GALACTOSIDASE-RXN: (expasy) 6-phospho-beta-galactosidase [3.2.1.85]	1.41748e-05	3.2287e-05	1.2253e-05	8.4622e-05	1.7781e-05	5.05538e-05	no
6-PHOSPHO-BETA-GLUCOSIDASE-RXN: (expasy) 6-phospho-beta-glucosidase [3.2.1.86]	9.20731e-05	0.000108243	9.4843e-05	0.000139151	9.10468e-05	0.000254673	no
6-PHOSPHOFRUCTO-2-KINASE-RXN: (expasy) 6-phosphofructo-2-kinase [2.7.1.105]	5.91801e-05	0	9.91402e-07	1.6555e-07	1.57304e-07	6.01966e-07	no
6.1.1.23-RXN: (expasy) Aspartate--tRNA(Asn) ligase [6.1.1.23]	0.000192143	0.000207513	0.000157032	0.000184983	0.000188627	0.000156229	no
6.1.1.24-RXN: (expasy) Glutamate--tRNA(Gln) ligase [6.1.1.24]	5.30318e-07	9.21153e-07	5.55197e-08	3.30194e-06	1.28961e-06	4.78036e-08	no
6.2.1.33-RXN: (expasy) 4-chlorobenzoate--CoA ligase [6.2.1.33]	1.39903e-06	0	1.81686e-07	5.15877e-07	0	3.45306e-06	no
6.3.1.12-RXN: (expasy) D-aspartate ligase [6.3.1.12]	4.88694e-06	0	0	9.64922e-07	7.10345e-06	0	no
6.3.2.10-RXN: (expasy) UDP-N-acetylmuramoyl-tripeptide--D-alanyl-D-alanine ligase [6.3.2.10]	0.000187275	0.000198628	0.00019129	0.000198081	0.000175129	0.000185064	no
6.3.2.29-RXN: (expasy) Cyanophycin synthase (L-aspartate-adding) [6.3.2.29]	0	0	8.26305e-07	3.97542e-06	0	8.81882e-07	no
6.3.2.7-RXN: (expasy) UDP-N-acetylmuramoyl-L-alanyl-D-glutamate--L-lysine ligase [6.3.2.7]	3.18895e-06	2.39047e-05	1.10731e-05	3.62489e-05	3.19967e-05	1.97555e-05	no
6.3.5.6-RXN: (expasy) Asparaginyl-tRNA synthase (glutamine-hydrolyzing) [6.3.5.6]	9.13752e-07	2.01878e-06	3.55003e-06	1.14544e-05	1.53715e-06	2.06044e-06	no
6.3.5.7-RXN: (expasy) Glutaminyl-tRNA synthase (glutamine-hydrolyzing) [6.3.5.7]	0.000150702	0.000134976	0.000113407	0.000165696	0.000148107	7.80528e-05	no
6.4.1.6-RXN: (expasy) Acetone carboxylase [6.4.1.6]	3.74315e-06	1.76348e-07	1.66237e-07	1.04384e-06	6.21666e-06	1.17343e-06	no
6PFRUCTPHOS-RXN: (expasy) 6-phosphofructokinase [2.7.1.11]	0.000313933	0.000453182	0.000438689	0.000379767	0.000358843	0.000395679	no
6PGLUCONDEHYDROG-RXN: (metacyc) phosphogluconate dehydrogenase [NAD(P)+-dependent, decarboxylating] [1.1.1.351]	0	2.24251e-07	0	0	1.71033e-07	3.93177e-06	no
6PGLUCONOLACT-RXN: (expasy) 6-phosphogluconolactonase [3.1.1.31]	3.24627e-05	2.13979e-05	3.05509e-05	1.64144e-05	3.33244e-05	5.72172e-05	no
7-ALPHA-HYDROXYSTEROID-DEH-RXN: (expasy) 7-alpha-hydroxysteroid dehydrogenase [1.1.1.159]	5.96024e-06	0	9.58597e-08	4.73335e-07	0	2.5241e-05	no
7KAPSYN-RXN: (expasy) 8-amino-7-oxononanoate synthase [2.3.1.47]	3.28304e-05	2.23682e-05	3.63599e-05	1.26202e-05	1.10191e-05	6.19842e-05	no
ABC-12-RXN: (expasy) ABC-type polar-amino-acid transporter [7.4.2.1]	0	0	0	1.83177e-08	0	2.62239e-06	no
ABC-13-RXN: (expasy) ABC-type polar-amino-acid transporter [7.4.2.1]	0	0	0	1.83177e-08	0	2.62239e-06	no
ABC-14-RXN: (expasy) ABC-type polar-amino-acid transporter [7.4.2.1]	0	0	0	1.83177e-08	0	2.62239e-06	no
ABC-16-RXN: (expasy) ABC-type maltose transporter [7.5.2.1]	8.18543e-08	0	0	1.93602e-08	0	1.19418e-05	no
ABC-19-RXN: (expasy) ABC-type molybdate transporter [7.3.2.5]	0	0	0	0	0	1.22013e-05	no
ABC-23-RXN: (expasy) ABC-type phosphonate transporter [7.3.2.2]	1.72066e-05	1.92761e-05	5.2157e-06	2.138e-05	1.37508e-05	2.50726e-05	no
ABC-27-RXN: (expasy) ABC-type phosphate transporter [7.3.2.1]	0.0002191	0.000207845	0.000213425	0.000254056	0.000238863	0.00016179	no
ABC-3-RXN: (expasy) ABC-type polar-amino-acid transporter [7.4.2.1]	0	0	0	1.83177e-08	0	2.62239e-06	no
ABC-37-RXN: (expasy) ABC-type polar-amino-acid transporter [7.4.2.1]	0	0	0	1.83177e-08	0	2.62239e-06	no
ABC-4-RXN: (expasy) ABC-type polar-amino-acid transporter [7.4.2.1]	0	0	0	1.83177e-08	0	2.62239e-06	no
ABC-64-RXN: (expasy) ABC-type taurine transporter [7.6.2.7]	9.53348e-08	0	0	0	0	6.01266e-06	no
ABC-7-RXN: (expasy) ABC-type sulfate transporter [7.3.2.3]	0	0	0	0	0	1.1381e-06	no
ABC-70-RXN: (expasy) ABC-type sulfate transporter [7.3.2.3]	0	0	0	0	0	1.1381e-06	no
ACECOATRANS-RXN: (expasy) Acetate CoA-transferase [2.8.3.8]	1.54934e-05	3.73057e-05	2.41086e-05	1.90847e-05	6.77107e-06	2.00042e-05	no
ACETALD-DEHYDROG-RXN: (expasy) Acetaldehyde dehydrogenase (acetylating) [1.2.1.10]	9.67998e-07	2.30042e-06	1.48743e-06	3.63739e-06	7.69112e-06	4.69301e-05	no
ACETATE--COA-LIGASE-ADP-FORMING-RXN: (expasy) Acetate--CoA ligase (ADP-forming) [6.2.1.13]	3.75462e-07	2.59247e-06	7.91312e-07	1.49519e-06	7.64214e-07	0	no
ACETATE--COA-LIGASE-RXN: (expasy) Acetate--CoA ligase [6.2.1.1]	3.67574e-06	1.16256e-06	4.95903e-07	1.34074e-06	5.27074e-06	7.21735e-05	no
ACETATEKIN-RXN: (expasy) AMBIGUOUS [2.7.2.1; 2.7.2.15]	0.000201942	0.00018498	0.000186568	0.000207196	0.000178422	0.00018005	no
ACETOACETATE--COA-LIGASE-RXN: (expasy) Acetoacetate--CoA ligase [6.2.1.16]	8.19481e-06	6.62411e-06	7.53358e-06	1.53837e-06	2.09585e-06	1.71089e-06	yes
ACETOACETATE-DECARBOXYLASE-RXN: (expasy) Acetoacetate decarboxylase [4.1.1.4]	1.85749e-07	0	0	0	4.54869e-07	6.02736e-07	no
ACETOACETYL-COA-TRANSFER-RXN: (expasy) Butyrate--acetoacetate CoA-transferase [2.8.3.9]	8.38373e-07	3.28054e-06	1.53967e-06	8.31972e-06	7.37915e-06	1.16212e-06	no
ACETOLACTATE-DECARBOXYLASE-RXN: (expasy) Acetolactate decarboxylase [4.1.1.5]	6.78918e-06	1.2177e-06	2.33735e-07	1.11048e-05	1.93661e-05	2.97496e-06	no
ACETOLACTREDUCTOISOM-RXN: (expasy) Ketol-acid reductoisomerase (NADP(+)) [1.1.1.86]	0.000287228	0.000198854	0.000204745	0.000186762	0.000181311	0.000181181	no
ACETOLACTSYN-RXN: (expasy) Acetolactate synthase [2.2.1.6]	0.000414336	0.000538737	0.000435211	0.000408542	0.000445238	0.000669515	no
ACETOOHBUTREDUCTOISOM-RXN: (expasy) Ketol-acid reductoisomerase (NADP(+)) [1.1.1.86]	0.000287228	0.000198854	0.000204745	0.000186762	0.000181311	0.000181181	no
ACETOOHBUTSYN-RXN: (metacyc) 2-aceto-2-hydroxy-butyrate synthase [2.2.1.6]	0.000414336	0.000538737	0.000435211	0.000408542	0.000445238	0.000669515	no
ACETYL-COA-ACETYLTRANSFER-RXN: (expasy) AMBIGUOUS [2.3.1.16; 2.3.1.9]	2.74432e-05	5.00825e-05	7.46082e-05	6.66166e-05	3.90599e-05	8.15261e-05	no
ACETYL-COA-CARBOXYLTRANSFER-RXN: (expasy) Acetyl-CoA carboxylase [6.4.1.2]	0.000188136	0.000236828	0.00015219	0.000133999	0.000171663	0.000308116	no
ACETYLGLUTKIN-RXN: (expasy) Acetylglutamate kinase [2.7.2.8]	0.000200245	0.000202606	0.000207027	0.000211407	0.000199339	0.000184183	no
ACETYLHOMOSER-CYS-RXN: (expasy) O-acetylhomoserine aminocarboxypropyltransferase [2.5.1.49]	0.000124631	8.1678e-05	8.23395e-05	8.53009e-05	7.07634e-05	7.09844e-05	no
ACETYLORNDEACET-RXN: (expasy) Acetylornithine deacetylase [3.5.1.16]	2.81229e-06	9.80567e-06	9.3919e-06	7.36997e-06	2.29933e-05	6.39921e-05	no
ACETYLORNTRANSAM-RXN: (expasy) Acetylornithine transaminase [2.6.1.11]	0.000170035	0.000186054	0.000170697	0.000181158	0.000135309	0.000184696	no
ACETYLSYNCLTH-RXN: (expasy) CO-methylating acetyl-CoA synthase [2.3.1.169]	5.83196e-05	9.26783e-05	3.63888e-05	2.65582e-05	5.60516e-05	2.82046e-05	no
ACID-PHOSPHATASE-RXN: (expasy) Acid phosphatase [3.1.3.2]	3.27484e-05	2.28523e-05	2.83207e-05	7.67363e-06	2.15479e-05	6.87507e-05	no
ACNEULY-RXN: (expasy) N-acetylneuraminate lyase [4.1.3.3]	3.75337e-05	5.60017e-05	4.87993e-05	2.01873e-05	6.42489e-05	5.5425e-05	no
ACP-S-ACETYLTRANSFER-RXN: (expasy) [Acyl-carrier-protein] S-acetyltransferase [2.3.1.38]	3.81232e-05	0	8.21826e-07	0	0	3.46019e-07	no
ACSERLY-RXN: (expasy) Cysteine synthase [2.5.1.47]	0.000167222	0.000211274	0.000248309	0.000266017	0.000247597	0.000241648	no
ACYL-COA-HYDROLASE-RXN: (expasy) Acyl-CoA hydrolase [3.1.2.20]	0	0	0	0	3.58495e-06	0	no
ACYLACPSYNTH-RXN: (expasy) Long-chain-fatty-acid--[acyl-carrier-protein] ligase [6.2.1.20]	6.16217e-08	2.18085e-07	0	0	1.91544e-07	1.2883e-05	no
ACYLAMINOACYL-PEPTIDASE-RXN: (expasy) Acylaminoacyl-peptidase [3.4.19.1]	7.63958e-08	0	0	0	0	0	no
ACYLGPEACYLTRANS-RXN: (expasy) Acyl-[acyl-carrier-protein]--phospholipid O-acyltransferase [2.3.1.40]	3.17982e-07	2.18085e-07	0	1.15041e-07	1.91544e-07	5.7918e-05	no
ACYLPHOSPHATASE-RXN: (expasy) Acylphosphatase [3.6.1.7]	0.000237498	0.000192408	0.000156732	0.000190449	0.000191792	0.000179296	no
ACYLPYRUVATE-HYDROLASE-RXN: (expasy) Acylpyruvate hydrolase [3.7.1.5]	0	0	0	0	2.27364e-07	0	no
ADCLY-RXN: (expasy) Aminodeoxychorismate lyase [4.1.3.38]	9.6379e-06	1.21618e-05	7.91623e-06	1.5254e-06	1.02537e-06	2.20814e-05	no
ADDALT-RXN: (expasy) Adenosine deaminase [3.5.4.4]	3.69466e-06	5.0339e-06	2.85002e-06	1.35385e-05	1.86031e-05	2.42856e-05	yes
ADENINE-DEAMINASE-RXN: (expasy) Adenine deaminase [3.5.4.2]	0.000111829	0.000121321	0.000110818	0.000133331	0.000132181	0.000160911	no
ADENODEAMIN-RXN: (expasy) Adenosine deaminase [3.5.4.4]	3.69466e-06	5.0339e-06	2.85002e-06	1.35385e-05	1.86031e-05	2.42856e-05	yes
ADENOSINE-KINASE-RXN: (expasy) Adenosine kinase [2.7.1.20]	1.70179e-07	0	8.44621e-08	0	0	0	no
ADENOSYLHOMOCYSTEINASE-RXN: (expasy) Adenosylhomocysteinase [3.3.1.1]	9.56361e-05	1.64224e-05	1.86786e-05	4.0462e-05	7.78271e-05	7.3684e-06	no
ADENOSYLHOMOCYSTEINE-NUCLEOSIDASE-RXN: (expasy) Adenosylhomocysteine nucleosidase [3.2.2.9]	0.000194573	0.000197481	0.000185589	0.000186835	0.000139786	0.000179174	no
ADENPHOSPHOR-RXN: (expasy) Purine-nucleoside phosphorylase [2.4.2.1]	0.000176894	0.000215117	0.000222849	0.000208574	0.000201712	0.000184067	no
ADENPRIBOSYLTRAN-RXN: (expasy) Adenine phosphoribosyltransferase [2.4.2.7]	0.000150592	0.000129407	0.000156228	0.00012945	0.000110013	0.000134666	no
ADENYL-KIN-RXN: (expasy) Adenylate kinase [2.7.4.3]	0.000221963	0.000210059	0.000221216	0.000246429	0.000235882	0.000193457	no
ADENYLATECYC-RXN: (expasy) Adenylate cyclase [4.6.1.1]	6.39523e-05	5.4072e-06	8.03505e-06	6.16488e-06	1.37204e-06	2.2665e-05	no
ADENYLOSUCCINATE-SYNTHASE-RXN: (expasy) Adenylosuccinate synthase [6.3.4.4]	0.000229988	0.000215199	0.000229359	0.000258436	0.000212521	0.000246609	no
ADENYLYLSULFATE-REDUCTASE-RXN: (expasy) Adenylyl-sulfate reductase [1.8.99.2]	1.33251e-05	1.39536e-05	2.84342e-05	2.94764e-05	0	1.01396e-05	no
ADENYLYLSULFKIN-RXN: (expasy) Adenylyl-sulfate kinase [2.7.1.25]	3.35091e-05	3.69724e-05	3.76495e-05	3.2789e-05	3.76224e-05	3.91923e-05	no
ADOMET-DMK-METHYLTRANSFER-RXN: (expasy) Demethylmenaquinone methyltransferase [2.1.1.163]	4.80415e-05	3.09573e-05	6.6127e-05	6.34159e-05	7.76454e-05	7.72632e-05	no
ADPREDUCT-RXN: (metacyc) ADP reductase [1.17.4.1]	0.000295408	6.9621e-05	5.71011e-05	7.42745e-05	0.000179272	0.000237276	no
ADPSUGPPHOSPHAT-RXN: (expasy) ADP-sugar diphosphatase [3.6.1.21]	0	0	0	0	6.62969e-06	0	no
AGMATIN-RXN: (expasy) Agmatinase [3.5.3.11]	2.64634e-05	1.69228e-05	5.72393e-05	6.1695e-05	2.98683e-05	5.66926e-05	no
AGMATINE-DEIMINASE-RXN: (expasy) Agmatine deiminase [3.5.3.12]	4.76514e-05	7.86137e-05	6.03061e-05	6.73428e-05	6.66805e-05	5.31051e-05	no
AICARSYN-RXN: (expasy) Adenylosuccinate lyase [4.3.2.2]	0.000133999	0.000180582	0.00017764	0.000202203	0.000201032	0.000157424	no
AICARTRANSFORM-RXN: (expasy) Phosphoribosylaminoimidazolecarboxamide formyltransferase [2.1.2.3]	0.000167288	0.00011137	0.000153338	0.000128238	0.000142795	0.000147633	no
AIRCARBOXY-RXN: (expasy) Phosphoribosylaminoimidazole carboxylase [4.1.1.21]	4.33759e-07	6.22935e-07	4.05992e-07	1.03169e-05	7.57339e-06	1.8374e-05	yes
AIRS-RXN: (expasy) Phosphoribosylformylglycinamidine cyclo-ligase [6.3.3.1]	0.00017015	0.000174837	0.000165726	0.000207102	0.000206285	0.000182024	no
AKBLIG-RXN: (expasy) Glycine C-acetyltransferase [2.3.1.29]	3.67684e-05	3.66425e-05	3.7882e-05	2.34777e-05	5.53853e-05	6.57542e-05	no
ALANINE--GLYOXYLATE-AMINOTRANSFERASE-RXN: (expasy) Alanine--glyoxylate transaminase [2.6.1.44]	0	0	0	0	0	0	no
ALANINE--TRNA-LIGASE-RXN: (expasy) Alanine--tRNA ligase [6.1.1.7]	0.000214295	0.000276746	0.000221974	0.000245821	0.000251525	0.000200792	no
ALANINE-AMINOTRANSFERASE-RXN: (expasy) Alanine transaminase [2.6.1.2]	3.77987e-05	3.37718e-07	2.04271e-05	2.75449e-05	7.11706e-07	2.23514e-05	no
ALANINE-DEHYDROGENASE-RXN: (expasy) Alanine dehydrogenase [1.4.1.1]	4.19226e-05	3.65216e-05	3.17696e-05	2.66243e-05	3.3374e-05	1.76558e-05	no
ALARACECAT-RXN: (expasy) Alanine racemase [5.1.1.1]	0.000207036	0.000208228	0.000214357	0.00027016	0.000251691	0.000239054	no
ALCOHOL-DEHYDROG-GENERIC-RXN: (expasy) Alcohol dehydrogenase [1.1.1.1]	0.000203915	0.000147736	0.000141398	0.000111331	0.000135006	0.000258032	no
ALCOHOL-DEHYDROG-RXN: (expasy) Alcohol dehydrogenase [1.1.1.1]	0.000203915	0.000147736	0.000141398	0.000111331	0.000135006	0.000254617	no
ALCOHOL-DEHYDROGENASE-NADPORNOP+-RXN: (expasy) Alcohol dehydrogenase (NADP(+)) [1.1.1.2]	8.44282e-06	4.67085e-05	1.40222e-05	1.95213e-05	2.36549e-05	1.4971e-05	no
ALDEHYDE-DEHYDROGENASE-NADORNOP+-RXN: (expasy) Aldehyde dehydrogenase (NAD(P)(+)) [1.2.1.5]	3.91692e-07	0	0	0	0	4.66111e-05	no
ALDEHYDE-OXIDASE-RXN: (expasy) Aldehyde oxidase [1.2.3.1]	0	0	0	2.3978e-07	0	0	no
ALDEHYDE-REDUCTASE-RXN: (expasy) Aldose reductase [1.1.1.21]	8.65452e-06	6.0836e-06	2.0246e-05	6.90378e-06	2.32495e-06	4.35977e-06	no
ALDHDEHYDROG-RXN: (expasy) Aldehyde dehydrogenase (NAD(+)) [1.2.1.3]	1.39348e-08	6.1552e-08	1.20197e-07	0	2.18539e-07	6.60763e-06	no
ALDOSE-1-DEHYDROGENASE-RXN: (expasy) Aldose 1-dehydrogenase (NAD(+)) [1.1.1.121]	0	0	0	1.83123e-06	0	0	no
ALDOSE-1-EPIMERASE-RXN: (expasy) Aldose 1-epimerase [5.1.3.3]	0.000234651	0.000204356	0.000241315	0.000192266	0.000200798	0.000213193	no
ALDOSE1EPIM-RXN: (expasy) Aldose 1-epimerase [5.1.3.3]	0.000234651	0.000204356	0.000241315	0.000192266	0.000200798	0.000213193	no
ALKANAL-MONOOXYGENASE-FMN-LINKED-RXN: (expasy) Bacterial luciferase [1.14.14.3]	6.41915e-08	0	0	2.95062e-06	1.96444e-06	1.32511e-07	no
ALKAPHOSPHA-RXN: (expasy) Alkaline phosphatase [3.1.3.1]	9.79109e-06	1.35283e-05	1.05765e-05	4.72049e-06	2.92778e-05	3.5217e-05	no
ALKYLGLYCERONE-PHOSPHATE-SYNTHASE-RXN: (expasy) Alkylglycerone-phosphate synthase [2.5.1.26]	0	0	0	1.35778e-07	0	0	no
ALLANTOATE-DEIMINASE-RXN: (expasy) Allantoate deiminase [3.5.3.9]	0	0	0	0	0	1.02674e-06	no
ALLANTOIN-RACEMASE-RXN: (expasy) Allantoin racemase [5.1.99.3]	2.95499e-07	0	0	3.36708e-08	0	0	no
ALLANTOINASE-RXN: (expasy) Allantoinase [3.5.2.5]	1.40019e-06	3.51504e-06	5.33476e-07	1.02439e-06	1.27803e-05	2.99433e-05	no
ALLOPHANATE-HYDROLASE-RXN: (expasy) Allophanate hydrolase [3.5.1.54]	0	0	9.97185e-07	2.43374e-08	0	2.47854e-07	no
ALLOSE-KINASE-RXN: (expasy) Allose kinase [2.7.1.55]	7.64984e-07	1.73893e-06	1.95582e-06	5.13498e-07	3.99674e-06	9.96129e-07	no
ALPHA-AMYL-RXN: (expasy) Alpha-amylase [3.2.1.1]	5.92087e-05	0.000103769	4.89183e-05	9.24027e-05	0.000107497	0.000142155	no
ALPHA-L-FUCOSIDASE-RXN: (expasy) Alpha-L-fucosidase [3.2.1.51]	1.63219e-05	1.31223e-05	4.06202e-05	1.78792e-05	1.07537e-05	5.45143e-06	no
ALPHAALPHA-TREHALOSE-PHOSPHORYLASE-RXN: (expasy) Alpha,alpha-trehalose phosphorylase [2.4.1.64]	0	0	0	0	0	2.54153e-07	no
ALPHAGALACTOSID-RXN: (expasy) Alpha-galactosidase [3.2.1.22]	0.000471185	0.000446644	0.000306337	0.000201001	0.000377339	0.000338113	no
ALTRO-OXIDOREDUCT-RXN: (expasy) Tagaturonate reductase [1.1.1.58]	3.21275e-05	4.35714e-05	5.60807e-05	6.18034e-05	2.17947e-05	7.86577e-05	no
ALTRODEHYDRAT-RXN: (expasy) Altronate dehydratase [4.2.1.7]	6.76458e-06	3.16954e-06	1.08968e-06	2.68881e-06	6.23165e-06	5.81107e-05	no
AMACETOXID-RXN: (expasy) Primary-amine oxidase [1.4.3.21]	9.64955e-08	0	0	0	0	1.11699e-05	no
AMIDASE-RXN: (expasy) Amidase [3.5.1.4]	1.3378e-05	4.31078e-05	1.66354e-05	1.42579e-05	3.13832e-05	1.22475e-06	no
AMINEOXID-RXN: (metacyc) Aliphatic-amine oxidase [1.4.3.21]	9.64955e-08	0	0	0	0	1.11699e-05	no
AMINEPHEN-RXN: (expasy) Primary-amine oxidase [1.4.3.21]	9.64955e-08	0	0	0	0	1.11699e-05	no
AMINOACYLASE-RXN: (expasy) N-acyl-aliphatic-L-amino acid amidohydrolase [3.5.1.14]	1.66859e-05	3.04034e-05	1.03259e-05	2.53764e-05	7.30204e-06	6.69159e-06	no
AMINOBUTDEHYDROG-RXN: (expasy) Aminobutyraldehyde dehydrogenase [1.2.1.19]	1.73825e-07	0	0	1.44999e-07	8.13885e-08	3.0772e-05	no
AMINOCYL-TRNA-HYDROLASE-RXN: (expasy) Aminoacyl-tRNA hydrolase [3.1.1.29]	0.000196012	0.000228082	0.000252124	0.000246717	0.000224005	0.000208283	no
AMINOGLYCOSIDE-N3-ACETYLTRANSFERASE-RXN: (expasy) Aminoglycoside N(3)-acetyltransferase [2.3.1.81]	7.40478e-06	2.86254e-06	9.7615e-06	1.16088e-05	1.22079e-05	8.35715e-06	no
AMINOGLYCOSIDE-N6-ACETYLTRANSFERASE-RXN: (expasy) Aminoglycoside 6'-N-acetyltransferase [2.3.1.82]	5.65117e-06	0	1.45164e-07	1.40434e-07	1.54159e-06	1.91701e-07	no
AMINOPARATHION-PHOSPHATASE-RXN: (metacyc) Aminoparathion hydrolase [3.1.8.1]	2.40243e-06	1.28978e-06	5.21538e-07	2.3113e-06	3.69216e-06	3.23087e-06	no
AMP-DEPHOSPHORYLATION-RXN: (expasy) 5'-nucleotidase [3.1.3.5]	0.000145624	0.000130384	0.000101405	9.58422e-05	0.000110895	0.000165792	no
AMP-NUCLEOSID-RXN: (expasy) AMP nucleosidase [3.2.2.4]	9.53817e-06	7.0971e-06	6.82373e-06	2.0474e-06	3.44229e-06	4.4689e-05	no
AMPSYN-RXN: (expasy) Adenylosuccinate lyase [4.3.2.2]	0.000133999	0.000180582	0.00017764	0.000202203	0.000201032	0.000157424	no
AMYLOMALT-RXN: (expasy) 4-alpha-glucanotransferase [2.4.1.25]	0.000277095	0.000296487	0.000301282	0.000292855	0.000221749	0.000256532	no
AMYLOSUCRASE-RXN: (expasy) Amylosucrase [2.4.1.4]	3.21148e-05	4.21635e-05	3.79173e-05	2.49333e-05	2.44075e-05	2.78413e-05	no
ANTHRANSYN-RXN: (expasy) Anthranilate synthase [4.1.3.27]	0.000140881	0.000153452	0.000123094	0.000151986	0.000105812	0.000119782	no
APIGNAR-RXN: (metacyc) Naringenin chalcone isomerase [5.5.1.6]	0	2.46706e-06	5.02333e-07	1.22543e-07	7.94668e-06	0	no
APYRASE-RXN: (expasy) Apyrase [3.6.1.5]	0	7.10966e-07	0	0	1.58118e-07	3.37804e-06	no
ARABISOM-RXN: (expasy) L-arabinose isomerase [5.3.1.4]	0.000191169	0.000169236	0.000140097	0.000112367	0.000110945	0.000146276	no
ARGDECARBOX-RXN: (expasy) Arginine decarboxylase [4.1.1.19]	0.000100674	0.000171283	0.000131352	8.60877e-05	0.000150821	0.000133579	no
ARGINASE-RXN: (expasy) Arginase [3.5.3.1]	2.25857e-05	8.51166e-06	1.63159e-05	6.41733e-06	1.89726e-05	7.08855e-06	no
ARGININE--TRNA-LIGASE-RXN: (expasy) Arginine--tRNA ligase [6.1.1.19]	0.000214477	0.000187492	0.000187748	0.000213965	0.000195349	0.000182013	no
ARGININE-DEIMINASE-RXN: (expasy) Arginine deiminase [3.5.3.6]	1.61201e-05	1.4512e-05	1.45762e-05	4.45325e-05	5.73593e-05	4.11488e-05	yes
ARGININE-KINASE-RXN: (expasy) Arginine kinase [2.7.3.3]	4.66365e-07	0	5.99487e-07	0	1.67865e-06	1.33959e-07	no
ARGININE-N-SUCCINYLTRANSFERASE-RXN: (expasy) Arginine N-succinyltransferase [2.3.1.109]	3.11253e-07	0	0	0	1.54096e-07	1.85304e-05	no
ARGSUCCINLYA-RXN: (expasy) Argininosuccinate lyase [4.3.2.1]	0.000169875	0.00018123	0.000181592	0.000198701	0.000192666	0.000181877	no
ARGSUCCINSYN-RXN: (expasy) Argininosuccinate synthase [6.3.4.5]	0.000179657	0.000192023	0.000183074	0.000211987	0.000193905	0.000202629	no
ARYL-ALCOHOL-DEHYDROGENASE-NADP+-RXN: (expasy) Aryl-alcohol dehydrogenase (NADP(+)) [1.1.1.91]	2.05225e-07	0	0	0	0	5.21634e-07	no
ARYL-ALCOHOL-DEHYDROGENASE-RXN: (expasy) Aryl-alcohol dehydrogenase [1.1.1.90]	4.35564e-06	2.9535e-07	2.36299e-07	9.96858e-07	5.36679e-06	2.28204e-07	no
ARYLAMINE-N-ACETYLTRANSFERASE-RXN: (expasy) Arylamine N-acetyltransferase [2.3.1.5]	1.42461e-06	0	2.92691e-07	2.55794e-07	4.52683e-06	1.15261e-07	no
ARYLDIALKYL-PHOSPHATASE-RXN: (expasy) Aryldialkylphosphatase [3.1.8.1]	2.40243e-06	1.28978e-06	5.21538e-07	2.3113e-06	3.69216e-06	3.23087e-06	no
ARYLDIALKYLPHOSPHATASE-RXN: (expasy) Aryldialkylphosphatase [3.1.8.1]	2.40243e-06	1.28978e-06	5.21538e-07	2.3113e-06	3.69216e-06	3.23087e-06	no
ARYLESTERASE-RXN: (expasy) Arylesterase [3.1.1.2]	1.07729e-05	3.34122e-05	1.58294e-05	8.88452e-06	4.72083e-06	1.44632e-05	no
ARYLFORMAMIDASE-RXN: (expasy) Arylformamidase [3.5.1.9]	1.99889e-05	2.15669e-05	1.20828e-05	1.73866e-05	2.96269e-05	9.72021e-06	no
ARYLSULFAT-RXN: (expasy) Arylsulfatase (type I) [3.1.6.1]	0.000112925	8.44822e-05	6.99792e-05	2.1981e-05	4.81749e-05	2.84096e-05	no
ARYLSULFATE-SULFOTRANSFERASE-RXN: (expasy) Aryl-sulfate sulfotransferase [2.8.2.22]	2.29933e-07	0	1.65976e-07	1.11829e-07	0	0	no
ASNSYNA-RXN: (expasy) Aspartate--ammonia ligase [6.3.1.1]	0.000119439	0.000144834	0.000150904	0.000128421	0.000121588	0.000191538	no
ASNSYNB-RXN: (expasy) Asparagine synthase (glutamine-hydrolyzing) [6.3.5.4]	7.84619e-05	0.0001031	7.63813e-05	0.00011222	9.33626e-05	0.000182531	no
ASPAMINOTRANS-RXN: (expasy) Aspartate transaminase [2.6.1.1]	0.000110101	9.47117e-05	8.93826e-05	8.7861e-05	8.79982e-05	0.000110416	no
ASPARAGHYD-RXN: (expasy) AMBIGUOUS [3.5.1.1; 3.5.1.38]	3.66245e-05	6.67615e-05	4.43456e-05	4.74605e-05	3.66542e-05	0.000158738	no
ASPARAGINE--TRNA-LIGASE-RXN: (expasy) Asparagine--tRNA ligase [6.1.1.22]	0.000152636	0.000202523	0.000195011	0.00017356	0.000184315	0.000187908	no
ASPARTASE-RXN: (expasy) Aspartate ammonia-lyase [4.3.1.1]	9.95088e-05	6.06511e-05	7.00762e-05	1.64508e-05	5.17744e-05	9.13873e-05	no
ASPARTATE--TRNA-LIGASE-RXN: (expasy) Aspartate--tRNA ligase [6.1.1.12]	6.61272e-05	8.8534e-05	0.000102695	0.000155921	0.000111968	9.93838e-05	no
ASPARTATE-4-DECARBOXYLASE-RXN: (expasy) Aspartate 4-decarboxylase [4.1.1.12]	3.51264e-06	1.45917e-06	2.97154e-06	6.5888e-07	1.70402e-06	0	no
ASPARTATE-RACEMASE-RXN: (expasy) Aspartate racemase [5.1.1.13]	7.83336e-06	4.61454e-06	4.40697e-06	1.65375e-05	1.65812e-05	1.85188e-05	yes
ASPARTATE-SEMIALDEHYDE-DEHYDROGENASE-RXN: (expasy) Aspartate-semialdehyde dehydrogenase [1.2.1.11]	0.000145382	0.000104135	0.000119773	0.00010852	0.000129966	0.000118411	no
ASPARTATEKIN-RXN: (expasy) Aspartate kinase [2.7.2.4]	0.000388993	0.00031424	0.000272042	0.000268603	0.000277715	0.000266104	no
ASPCARBTRANS-RXN: (expasy) Aspartate carbamoyltransferase [2.1.3.2]	0.000167236	0.000172763	0.000180535	0.000219914	0.000206063	0.000179435	no
ASPDECARBOX-RXN: (expasy) Aspartate 1-decarboxylase [4.1.1.11]	8.72512e-05	0.000111998	0.000129679	0.000115223	0.000128089	9.05332e-05	no
ATP-ADENYLYLTRANSFERASE-RXN: (expasy) ATP adenylyltransferase [2.7.7.53]	4.68929e-05	4.11461e-08	8.23712e-07	0	1.2607e-07	6.12913e-07	no
ATP-PYROPHOSPHATASE-RXN: (expasy) ATP diphosphatase [3.6.1.8]	1.54676e-06	8.54677e-06	3.38795e-06	1.77314e-05	8.12803e-06	8.19932e-05	no
ATPASE-RXN: (expasy) Nucleoside-triphosphate phosphatase [3.6.1.15]	1.0289e-05	1.03755e-06	1.31766e-06	7.48209e-07	1.3643e-05	8.38401e-06	no
ATPPHOSPHORIBOSYLTRANS-RXN: (expasy) ATP phosphoribosyltransferase [2.4.2.17]	0.000167847	0.000161945	0.000171892	0.000165761	0.000170109	0.000140524	no
ATPSYN-RXN: (expasy) H(+)-transporting two-sector ATPase [7.1.2.2]	0.000717472	0.000814255	0.000755526	0.000656142	0.000650312	0.000566375	no
AZOBENZENE-REDUCTASE-RXN: (expasy) Azobenzene reductase [1.7.1.6]	1.19523e-06	5.99154e-07	1.43296e-07	1.31504e-05	1.27083e-05	4.78112e-06	no
BA7DEHYDRA-RXN: (expasy) Bile-acid 7-alpha-dehydratase [4.2.1.106]	2.22855e-07	2.4287e-07	3.81004e-07	2.25522e-07	5.133e-06	3.45092e-07	no
BADEL4OXRED-RXN: (expasy) 3-dehydro-bile acid Delta(4,6)-reductase [1.3.1.114]	0	2.07064e-07	0	0	3.15235e-06	0	no
BADEL6OXRED-RXN: (expasy) 3-dehydro-bile acid Delta(4,6)-reductase [1.3.1.114]	0	2.07064e-07	0	0	3.15235e-06	0	no
BADH-RXN: (expasy) Betaine-aldehyde dehydrogenase [1.2.1.8]	2.51826e-06	1.90499e-07	8.65636e-08	2.85669e-07	1.19876e-06	6.23206e-05	no
BAI3OXO-OXRED-RXN: (expasy) 3-oxocholoyl-CoA 4-desaturase [1.3.1.115]	0	1.77097e-07	0	0	3.81885e-06	2.17949e-07	no
BAIAEUBSP-RXN: (expasy) 3-alpha-hydroxybile acid CoA 3-dehydrogenase [1.1.1.395]	0	2.92881e-07	0	1.37668e-07	3.8089e-06	1.44829e-07	no
BENZALDEHYDE-DEHYDROGENASE-NAD+-RXN: (expasy) Benzaldehyde dehydrogenase (NAD(+)) [1.2.1.28]	0	0	0	0	0	0	no
BENZENE-12-DIOXYGENASE-RXN: (expasy) Benzene 1,2-dioxygenase [1.14.12.3]	6.98062e-08	0	0	0	0	0	no
BENZOATE--COA-LIGASE-RXN: (expasy) Benzoate--CoA ligase [6.2.1.25]	0	0	0	0	0	0	no
BENZOATE-12-DIOXYGENASE-RXN: (expasy) Benzoate 1,2-dioxygenase [1.14.12.10]	0	0	0	0	0	6.0615e-06	no
BENZOYLFORMATE-DECARBOXYLASE-RXN: (expasy) Benzoylformate decarboxylase [4.1.1.7]	5.93085e-08	0	1.80014e-07	0	2.3978e-06	0	no
BENZYL-ALC-DEHYDROGENASE-RXN: (expasy) Aryl-alcohol dehydrogenase [1.1.1.90]	4.35564e-06	2.9535e-07	2.36299e-07	9.96858e-07	5.36679e-06	2.28204e-07	no
BENZYL-ALCOHOL-DEHYDROGENASE-RXN: (expasy) Aryl-alcohol dehydrogenase [1.1.1.90]	4.35564e-06	2.9535e-07	2.36299e-07	9.96858e-07	5.36679e-06	2.28204e-07	no
BETA-GLUCOSIDE-KINASE-RXN: (expasy) Beta-glucoside kinase [2.7.1.85]	4.11043e-05	5.92378e-05	7.81726e-06	6.11173e-06	5.93704e-05	2.48983e-05	no
BETA-GLUCURONID-RXN: (expasy) Beta-glucuronidase [3.2.1.31]	2.37076e-05	6.12631e-05	4.17934e-05	3.40159e-05	4.20602e-05	5.7551e-05	no
BETA-LACTAMASE-RXN: (expasy) Beta-lactamase [3.5.2.6]	7.41931e-05	7.67909e-05	6.7132e-05	7.08278e-05	0.000136443	0.000108009	no
BETA-LYSINE-56-AMINOMUTASE-RXN: (expasy) Lysine 5,6-aminomutase [5.4.3.3]	1.13772e-07	0	0	0	1.46708e-06	0	no
BETA-PHOSPHOGLUCOMUTASE-RXN: (expasy) Beta-phosphoglucomutase [5.4.2.6]	2.80964e-05	4.52078e-05	6.33019e-05	2.68887e-05	2.73188e-05	4.09375e-05	no
BETA-UREIDOPROPIONASE-RXN: (expasy) Beta-ureidopropionase [3.5.1.6]	0	0	0	0	0	0	no
BILIRUBIN-OXIDASE-RXN: (expasy) Bilirubin oxidase [1.3.3.5]	4.44508e-06	0	0	0	0	0	no
BIOTIN-CARBOXYL-RXN: (expasy) Biotin carboxylase [6.3.4.14]	0.000197755	0.000227526	0.00014248	0.000138256	0.000166452	0.000164764	no
BIOTINLIG-RXN: (expasy) Biotin--[biotin carboxyl-carrier protein] ligase [6.3.4.15]	0.000100307	0.000193418	0.000208437	0.000194001	0.000164409	0.000166181	no
BIPHENYL-23-DIOL-12-DIOXYGENASE-RXN: (expasy) Biphenyl-2,3-diol 1,2-dioxygenase [1.13.11.39]	0	0	0	0	0	0	no
BIS5-ADENOSYL-TRIPHOSPHATASE-RXN: (expasy) Bis(5'-adenosyl)-triphosphatase [3.6.1.29]	1.42175e-05	0	7.5113e-08	0	0	5.49745e-06	no
BLASTICIDIN-S-DEAMINASE-RXN: (expasy) Blasticidin-S deaminase [3.5.4.23]	0	0	0	5.61335e-08	3.66777e-06	0	no
BRANCHED-CHAINAMINOTRANSFERILEU-RXN: (expasy) Branched-chain-amino-acid transaminase [2.6.1.42]	0.000148069	0.000139137	0.000120561	0.000146309	0.000153855	0.00015456	no
BRANCHED-CHAINAMINOTRANSFERLEU-RXN: (expasy) AMBIGUOUS [2.6.1.42; 2.6.1.6]	0.000148069	0.000139137	0.000120561	0.000146309	0.000153855	0.00015456	no
BRANCHED-CHAINAMINOTRANSFERVAL-RXN: (expasy) Branched-chain-amino-acid transaminase [2.6.1.42]	0.000148069	0.000139137	0.000120561	0.000146309	0.000153855	0.00015456	no
BTUR2-RXN: (expasy) Corrinoid adenosyltransferase [2.5.1.17]	9.49479e-05	0.000180119	0.000113394	9.01979e-05	0.000151431	0.000142029	no
BUTYRATE-KINASE-RXN: (expasy) AMBIGUOUS [2.7.2.14; 2.7.2.7]	3.04059e-05	4.50687e-05	3.53637e-05	2.83096e-05	7.01119e-05	2.33381e-05	no
BUTYRYL-COA-DEHYDROGENASE-RXN: (expasy) Short-chain acyl-CoA dehydrogenase [1.3.8.1]	4.67219e-05	7.72726e-05	8.99783e-05	6.57413e-05	4.79339e-05	3.8272e-05	no
CAFFEOYL-COA-O-METHYLTRANSFERASE-RXN: (expasy) Caffeoyl-CoA O-methyltransferase [2.1.1.104]	2.92301e-07	0	2.68555e-07	4.27099e-07	1.59688e-07	0	no
CARBAMATE-KINASE-RXN: (expasy) Carbamate kinase [2.7.2.2]	8.09017e-07	3.76313e-06	3.03559e-06	4.84837e-06	2.1001e-05	9.25513e-05	no
CARBODEHYDRAT-RXN: (expasy) Carbonic anhydrase [4.2.1.1]	9.94528e-05	3.35727e-05	3.43626e-05	3.6853e-05	1.95055e-05	7.20385e-05	no
CARBOXY-CISCIS-MUCONATE-CYCLASE-RXN: (expasy) Carboxy-cis,cis-muconate cyclase [5.5.1.5]	0	0	0	6.62328e-08	0	0	no
CARBOXYCYCLOHEXADIENYL-DEHYDRATASE-RXN: (expasy) Arogenate dehydratase [4.2.1.91]	6.49351e-05	0	1.47476e-06	7.0064e-08	2.28424e-05	9.01981e-07	no
CARBOXYLATE-REDUCTASE-RXN: (expasy) Carboxylate reductase [1.2.99.6]	0	0	0	0	0	2.40521e-05	no
CARBOXYLESTERASE-RXN: (expasy) Carboxylesterase [3.1.1.1]	1.43912e-05	1.10268e-06	6.02372e-07	1.06599e-06	1.89188e-05	5.03346e-05	no
CARBOXYMETHYLENEBUTENOLIDASE-RXN: (expasy) Carboxymethylenebutenolidase [3.1.1.45]	1.18944e-07	0	0	0	2.3627e-07	2.12621e-05	no
CARBPSYN-RXN: (expasy) Carbamoyl-phosphate synthase (glutamine-hydrolyzing) [6.3.5.5]	0.000501077	0.00047929	0.000453437	0.000444078	0.000545628	0.000444455	no
CARNDETRU-RXN: (expasy) Crotonobetainyl-CoA hydratase [4.2.1.149]	0	0	0	1.19048e-07	0	8.72252e-07	no
CARVEOL-DEHYDROGENASE-RXN: (expasy) Carveol dehydrogenase [1.1.1.243]	0	2.1635e-07	0	0	7.01379e-08	1.05436e-06	no
CATAL-RXN: (expasy) AMBIGUOUS [1.11.1.21; 1.11.1.6]	1.76633e-06	2.77615e-06	2.9833e-06	1.47748e-06	1.12172e-06	7.9865e-05	no
CATECHOL-12-DIOXYGENASE-RXN: (expasy) Catechol 1,2-dioxygenase [1.13.11.1]	0	0	0	0	0	0	no
CATECHOL-2-3-DIOXYGENASE-RXN: (metacyc) Methylcatechol 2,3-dioxygenase [1.13.11.2]	0	0	0	0	4.09709e-06	0	no
CATECHOL-23-DIOXYGENASE-RXN: (expasy) Catechol 2,3-dioxygenase [1.13.11.2]	0	0	0	0	4.09709e-06	0	no
CDP-GLUCOSE-46-DEHYDRATASE-RXN: (expasy) CDP-glucose 4,6-dehydratase [4.2.1.45]	9.56769e-06	6.91715e-06	2.2113e-05	1.03992e-05	5.69659e-06	4.96393e-06	no
CDPDIGLYPYPHOSPHA-RXN: (expasy) CDP-diacylglycerol diphosphatase [3.6.1.26]	4.08722e-08	0	0	4.8274e-08	1.33943e-07	2.69848e-05	no
CDPDIGLYSYN-RXN: (expasy) Phosphatidate cytidylyltransferase [2.7.7.41]	0.000136836	0.000161268	0.000157186	0.000153076	0.00015929	0.000256121	no
CDPKIN-RXN: (expasy) Nucleoside-diphosphate kinase [2.7.4.6]	3.65735e-05	2.5354e-05	1.97914e-05	4.64356e-05	4.05027e-05	4.04082e-05	no
CDPREDUCT-RXN: (expasy) Ribonucleoside-diphosphate reductase [1.17.4.1]	0.000295408	6.9621e-05	5.71011e-05	7.42745e-05	0.000179272	0.000237276	no
CELLOBIOSE-EPIMERASE-RXN: (expasy) Cellobiose epimerase [5.1.3.11]	4.18681e-05	3.95461e-05	4.51715e-05	3.73785e-05	3.47203e-05	2.74119e-05	no
CELLOBIOSE-PHOSPHORYLASE-RXN: (expasy) Cellobiose phosphorylase [2.4.1.20]	1.48426e-07	2.16778e-06	3.40696e-06	1.18753e-05	2.47409e-06	2.06462e-06	no
CELLULOSE-SYNTHASE-UDP-FORMING-RXN: (expasy) Cellulose synthase (UDP-forming) [2.4.1.12]	2.16311e-06	1.91946e-07	1.21032e-06	3.66237e-06	2.39858e-06	7.66936e-05	no
CEPHALOSPORIN-C-DEACETYLASE-RXN: (expasy) Cephalosporin-C deacetylase [3.1.1.41]	1.88481e-06	6.27597e-06	8.56206e-06	2.54597e-05	2.28281e-05	1.75786e-05	no
CERAMIDASE-RXN: (expasy) Ceramidase [3.5.1.23]	0	0	3.47963e-06	0	1.99548e-07	0	no
CERAMIDASE-YEAST-RXN: (expasy) Ceramidase [3.5.1.23]	0	0	3.47963e-06	0	1.99548e-07	0	no
CEREBROSIDE-SULFATASE-RXN: (expasy) Cerebroside-sulfatase [3.1.6.8]	0	0	0	0	0	0	no
CHALCONE-ISOMERASE-RXN: (expasy) Chalcone isomerase [5.5.1.6]	0	2.46706e-06	5.02333e-07	1.22543e-07	7.94668e-06	0	no
CHD-RXN: (expasy) Choline dehydrogenase [1.1.99.1]	1.59872e-07	0	0	0	2.01753e-07	3.60057e-05	no
CHEBDEAMID-RXN: (expasy) Protein-glutamine glutaminase [3.5.1.44]	2.39385e-05	5.41123e-06	6.10285e-05	7.48851e-05	1.52827e-05	4.23928e-05	no
CHER-RXN: (expasy) Protein-glutamate O-methyltransferase [2.1.1.80]	1.12573e-05	2.26905e-06	5.90299e-06	7.33763e-06	7.77697e-06	3.66967e-05	no
CHLORAMPHENICOL-O-ACETYLTRANSFERASE-RXN: (expasy) Chloramphenicol O-acetyltransferase [2.3.1.28]	3.05319e-05	4.45499e-05	3.91359e-05	1.9614e-05	3.76008e-05	2.11941e-05	no
CHLORIDE-PEROXIDASE-RXN: (expasy) Chloride peroxidase [1.11.1.10]	3.42615e-07	9.00213e-07	2.5322e-06	2.14244e-06	1.03954e-06	7.80901e-06	no
CHOLATE--COA-LIGASE-RXN: (expasy) Cholate--CoA ligase [6.2.1.7]	0	1.56902e-07	0	0	4.12719e-06	1.17285e-07	no
CHOLINE-KINASE-RXN: (expasy) Choline kinase [2.7.1.32]	0	0	0	0	2.61208e-07	0	no
CHOLINE-SULFATASE-RXN: (expasy) Choline-sulfatase [3.1.6.6]	1.77681e-05	1.8594e-05	1.75924e-05	5.98252e-06	1.31288e-05	1.74919e-05	no
CHOLOYLGLYCINE-HYDROLASE-RXN: (expasy) Choloylglycine hydrolase [3.5.1.24]	0.000139073	0.000188776	0.00011377	9.51997e-05	0.000112825	9.05351e-05	no
CHORISMATE-SYNTHASE-RXN: (expasy) Chorismate synthase [4.2.3.5]	0.000167616	0.000167911	0.000176417	0.000184637	0.000173936	0.000158881	no
CHORISMATEMUT-RXN: (expasy) Chorismate mutase [5.4.99.5]	6.27306e-05	2.18852e-05	2.37687e-05	2.22072e-05	2.80298e-05	1.65153e-05	no
CHORPYRLY-RXN: (expasy) Chorismate lyase [4.1.3.40]	5.47217e-08	0	0	0	1.22153e-07	3.45953e-05	no
CITC-RXN: (expasy) [Citrate (pro-3S)-lyase] ligase [6.2.1.22]	1.35101e-05	2.30408e-05	2.07977e-05	1.85934e-05	1.43466e-05	3.53953e-05	no
CITLY-RXN: (expasy) Citrate (pro-3S)-lyase [4.1.3.6]	3.82755e-05	4.85968e-05	2.88941e-05	3.15926e-05	4.30766e-05	8.40568e-05	no
CITRAMALATE-COA-TRANSFERASE-RXN: (expasy) Citramalate CoA-transferase [2.8.3.11]	0	0	1.90607e-07	2.107e-07	0	0	no
CITRYLY-RXN: (expasy) Citryl-CoA lyase [4.1.3.34]	5.07934e-06	1.51643e-07	1.63092e-07	1.75529e-07	1.02222e-06	1.00981e-06	no
CITSYN-RXN: (expasy) AMBIGUOUS [2.3.3.1; 2.3.3.16]	3.41667e-06	2.02318e-07	1.65414e-05	1.51634e-05	6.90306e-06	2.6257e-05	no
CITTRANS-RXN: (expasy) Citrate CoA-transferase [2.8.3.10]	2.86621e-05	2.66191e-05	1.84742e-05	1.90745e-05	3.37484e-05	2.31703e-05	no
COA-DISULFIDE-REDUCTASE-NADH-RXN: (expasy) CoA-disulfide reductase [1.8.1.14]	2.10248e-05	1.61181e-05	2.53879e-05	1.49311e-05	2.2382e-05	1.2241e-05	no
COBALAMIN5PSYN-RXN: (expasy) Adenosylcobinamide-GDP ribazoletransferase [2.7.8.26]	8.2528e-05	0.000132772	0.000131368	0.000126217	0.000119604	0.000119674	no
COBALAMINSYN-RXN: (expasy) Adenosylcobinamide-GDP ribazoletransferase [2.7.8.26]	8.2528e-05	0.000132772	0.000131368	0.000126217	0.000119604	0.000119674	no
COBINAMIDEKIN-RXN: (expasy) Adenosylcobinamide kinase [2.7.1.156]	2.27207e-05	0.000151795	8.43496e-05	6.65717e-05	8.55473e-05	0.000165056	no
COBINPGUANYLYLTRANS-RXN: (expasy) Adenosylcobinamide-phosphate guanylyltransferase [2.7.7.62]	2.82058e-06	2.44254e-05	2.57502e-05	1.48539e-05	4.70971e-06	0.000107917	no
COENZYME-F420-HYDROGENASE-RXN: (expasy) Coenzyme F420 hydrogenase [1.12.98.1]	0	0	0	0	0	0	no
CPM-KDOSYNTH-RXN: (expasy) 3-deoxy-manno-octulosonate cytidylyltransferase [2.7.7.38]	3.05406e-05	2.4619e-05	2.63247e-05	2.33309e-05	4.76094e-05	3.76676e-05	no
CREATINASE-RXN: (expasy) Creatinase [3.5.3.3]	0	0	0	0	0	0	no
CREATININASE-RXN: (expasy) Creatininase [3.5.2.10]	1.17603e-05	5.11818e-05	1.52517e-05	7.31339e-06	4.16929e-05	3.0296e-05	no
CROBETREDUCT-RXN: (expasy) Crotonobetainyl-CoA reductase [1.3.8.13]	0	0	0	0	0	7.21596e-06	no
CTPSYN-RXN: (expasy) CTP synthase (glutamine hydrolyzing) [6.3.4.2]	0.000186913	0.000173659	0.000218244	0.000202498	0.000197289	0.000180871	no
CYCLOHEXADIENYL-DEHYDROGENASE-RXN: (expasy) Arogenate dehydrogenase [1.3.1.43]	3.66247e-05	9.01084e-05	6.03532e-05	5.70099e-05	6.47452e-05	3.87237e-05	no
CYCLOMALTODEXTRINASE-RXN: (expasy) Cyclomaltodextrinase [3.2.1.54]	3.47995e-05	5.08438e-05	4.08754e-05	2.21848e-05	5.2597e-05	6.46231e-05	no
CYCLOPENTANOL-DEHYDROGENASE-RXN: (expasy) Cyclopentanol dehydrogenase [1.1.1.163]	0	0	9.91165e-08	0	6.94843e-06	9.4506e-08	no
CYCPHOSDIESTER-RXN: (expasy) 2',3'-cyclic-nucleotide 2'-phosphodiesterase [3.1.4.16]	1.13508e-06	4.57175e-06	3.16848e-07	1.05554e-05	4.69381e-06	1.30965e-05	no
CYSPH-RXN: (expasy) Cystathionine gamma-synthase [2.5.1.48]	0.000794769	2.64388e-05	1.70291e-05	2.6318e-05	1.90931e-05	7.52628e-05	no
CYSTATHIONINE-BETA-LYASE-RXN: (expasy) Cysteine-S-conjugate beta-lyase [4.4.1.13]	2.27506e-07	8.94579e-08	0	0	0	1.86894e-05	no
CYSTATHIONINE-BETA-SYNTHASE-RXN: (expasy) Cystathionine beta-synthase [4.2.1.22]	9.3559e-08	1.05197e-06	6.88017e-08	5.20914e-07	1.48247e-07	0	no
CYSTEINE--TRNA-LIGASE-RXN: (expasy) Cysteine--tRNA ligase [6.1.1.16]	0.000227388	0.000182657	0.000186787	0.0002225	0.000204561	0.000223797	no
CYTDEAM-RXN: (expasy) Cytosine deaminase [3.5.4.1]	8.91022e-06	1.40745e-07	6.77767e-07	1.25432e-06	1.5608e-05	4.52989e-05	no
CYTIDEAM-RXN: (expasy) Cytidine deaminase [3.5.4.5]	0.000123278	0.000181148	0.000165527	0.000148702	0.000163696	0.000140448	no
CYTIDEAM2-RXN: (expasy) Cytidine deaminase [3.5.4.5]	0.000123278	0.000181148	0.000165527	0.000148702	0.000163696	0.000140448	no
CYTIDINEKIN-RXN: (expasy) Uridine/cytidine kinase [2.7.1.48]	0.000106459	0.000153737	0.000149507	0.000107897	0.000136189	0.000105642	no
CYTOCHROME-B5-REDUCTASE-RXN: (expasy) Cytochrome-b5 reductase [1.6.2.2]	0	0	0	0	0	9.48758e-08	no
CYTOCHROME-C-OXIDASE-RXN: (expasy) Cytochrome-c oxidase [7.1.1.9]	0	0	0	0	0	0	no
CYTOCHROME-C-PEROXIDASE-RXN: (expasy) Cytochrome-c peroxidase [1.11.1.5]	1.70757e-06	1.3004e-06	1.68992e-06	1.97056e-07	8.93569e-07	2.9149e-05	no
CYTOCHROME-C3-HYDROGENASE-RXN: (expasy) Cytochrome-c3 hydrogenase [1.12.2.1]	2.68734e-06	1.04729e-06	1.59569e-07	2.2355e-07	3.01095e-06	4.22549e-07	no
D--TARTRATE-DEHYDRATASE-RXN: (expasy) D(-)-tartrate dehydratase [4.2.1.81]	1.72715e-08	0	0	1.68164e-08	0	4.03907e-06	no
D-ALANINE-AMINOTRANSFERASE-RXN: (expasy) D-amino-acid transaminase [2.6.1.21]	4.38866e-06	1.11541e-06	5.82614e-07	5.47971e-06	4.55871e-06	2.39254e-06	no
D-ARABINITOL-4-DEHYDROGENASE-RXN: (expasy) D-arabinitol 4-dehydrogenase [1.1.1.11]	0	0	0	0	0	0	no
D-LACTATE-DEHYDROGENASE-CYTOCHROME-RXN: (expasy) D-lactate dehydrogenase (cytochrome) [1.1.2.4]	0	0	0	0	9.52388e-08	0	no
D-LYSINE-56-AMINOMUTASE-RXN: (expasy) Lysine 5,6-aminomutase [5.4.3.3]	1.13772e-07	0	0	0	1.46708e-06	0	no
D-LYXOSE-KETOL-ISOMERASE-RXN: (expasy) D-lyxose ketol-isomerase [5.3.1.15]	3.19909e-07	0	0	0	5.34945e-06	3.39892e-07	no
D-PPENTOMUT-RXN: (metacyc) D-deoxyribose 1,5-phosphomutase [5.4.2.7]	0.000131033	0.000162618	0.000161575	0.000131731	0.000107689	0.000152951	no
D-RIBULOKIN-RXN: (expasy) D-ribulokinase [2.7.1.47]	0	0	0	8.45587e-08	0	0	no
D-THREO-ALDOSE-1-DEHYDROGENASE-RXN: (expasy) D-threo-aldose 1-dehydrogenase [1.1.1.122]	2.04088e-05	1.00204e-05	1.00071e-05	4.20569e-06	4.40084e-06	5.40416e-06	no
D-XYLOSE-1-DEHYDROGENASE-NADP+-RXN: (expasy) D-xylose 1-dehydrogenase (NADP(+), D-xylono-1,5-lactone-forming) [1.1.1.179]	1.03572e-05	1.72814e-06	0	0	5.44814e-07	0	no
D-XYLULOSE-REDUCTASE-RXN: (expasy) D-xylulose reductase [1.1.1.9]	6.91628e-08	0	0	0	3.09811e-06	1.03565e-07	no
DADPKIN-RXN: (expasy) Nucleoside-diphosphate kinase [2.7.4.6]	3.65735e-05	2.5354e-05	1.97914e-05	4.64356e-05	4.05027e-05	4.04082e-05	no
DAHPSYN-RXN: (expasy) 3-deoxy-7-phosphoheptulonate synthase [2.5.1.54]	0.000227091	0.000260639	0.00023416	0.00022351	0.00022145	0.000279976	no
DALADALALIG-RXN: (expasy) D-alanine--D-alanine ligase [6.3.2.4]	0.000241956	0.000240006	0.000210243	0.000256035	0.000244685	0.000228794	no
DAPASYN-RXN: (expasy) Adenosylmethionine--8-amino-7-oxononanoate transaminase [2.6.1.62]	3.06683e-05	7.04675e-05	4.87461e-05	1.67971e-05	7.57658e-05	7.27422e-05	no
DARAB5PISOM-RXN: (expasy) Arabinose-5-phosphate isomerase [5.3.1.13]	3.08477e-06	5.02951e-06	4.83388e-06	9.14645e-07	1.66577e-06	8.2942e-05	no
DARABALDOL-RXN: (expasy) L-fuculose-phosphate aldolase [4.1.2.17]	1.95552e-05	9.627e-05	4.77396e-05	2.73634e-05	4.51577e-05	6.25129e-05	no
DARABISOM-RXN: (expasy) D-arabinose isomerase [5.3.1.3]	0	0	0	0	0	7.84992e-08	no
DARABKIN-RXN: (expasy) L-fuculokinase [2.7.1.51]	1.37171e-05	1.38092e-05	5.17884e-06	1.51068e-05	2.50877e-05	5.07391e-05	no
DCDPKIN-RXN: (expasy) Nucleoside-diphosphate kinase [2.7.4.6]	3.65735e-05	2.5354e-05	1.97914e-05	4.64356e-05	4.05027e-05	4.04082e-05	no
DCMP-DEAMINASE-RXN: (expasy) dCMP deaminase [3.5.4.12]	2.57664e-05	3.17854e-05	2.21885e-05	1.24301e-05	2.15616e-05	1.08573e-05	no
DCTP-DEAM-RXN: (expasy) dCTP deaminase [3.5.4.13]	2.82614e-07	8.49715e-07	1.76019e-08	1.37558e-06	7.21101e-06	5.16001e-05	no
DCTP-PYROPHOSPHATASE-RXN: (expasy) AMBIGUOUS [3.6.1.12; 3.6.1.65; 3.6.1.9]	1.70922e-06	0	0	0	9.76813e-07	6.8087e-06	no
DCYSDESULF-RXN: (expasy) D-cysteine desulfhydrase [4.4.1.15]	8.48357e-07	5.01112e-07	3.61229e-06	4.62946e-07	1.54744e-06	3.33483e-05	no
DEHYDDEOXGALACTKIN-RXN: (expasy) AMBIGUOUS [2.7.1.178; 2.7.1.58]	2.73468e-07	0	1.79107e-07	0	0	4.52859e-05	no
DEHYDDEOXPHOSGALACT-ALDOL-RXN: (expasy) AMBIGUOUS [4.1.2.21; 4.1.2.55]	3.21707e-06	2.08184e-05	5.25943e-07	3.13141e-06	2.503e-06	3.05754e-05	no
DEOXYADENPHOSPHOR-RXN: (expasy) Purine-nucleoside phosphorylase [2.4.2.1]	0.000176894	0.000215117	0.000222849	0.000208574	0.000201712	0.000184067	no
DEOXYCYTIDINE-KINASE-RXN: (expasy) Deoxycytidine kinase [2.7.1.74]	5.29644e-06	0	9.8806e-08	0	9.09939e-08	7.68863e-07	no
DEOXYGLUCONOKIN-RXN: (expasy) AMBIGUOUS [2.7.1.178; 2.7.1.45]	6.80076e-06	2.59703e-06	1.41175e-05	4.79425e-06	1.04554e-05	1.86229e-05	no
DEOXYGUANOSINE-KINASE-RXN: (expasy) AMBIGUOUS [2.7.1.113; 2.7.1.145; 2.7.1.74]	0	0	0	4.49254e-08	0	0	no
DEOXYGUANPHOSPHOR-RXN: (expasy) Purine-nucleoside phosphorylase [2.4.2.1]	0.000176894	0.000215117	0.000222849	0.000208574	0.000201712	0.000184067	no
DEOXYINOPHOSPHOR-RXN: (expasy) Purine-nucleoside phosphorylase [2.4.2.1]	0.000176894	0.000215117	0.000222849	0.000208574	0.000201712	0.000184067	no
DEOXYRIBODIPYRIMIDINE-PHOTOLYASE-RXN: (expasy) Deoxyribodipyrimidine photo-lyase [4.1.99.3]	6.91932e-08	0	0	6.81198e-08	2.70991e-06	4.99926e-05	no
DEOXYRIBOSE-P-ALD-RXN: (expasy) Deoxyribose-phosphate aldolase [4.1.2.4]	0.000207116	0.000221552	0.000190752	0.000171816	0.000188895	0.000134174	no
DEPHOSPHOCOAKIN-RXN: (expasy) Dephospho-CoA kinase [2.7.1.24]	0.000189828	0.000173437	0.000167204	0.000194427	0.000189058	0.000142155	no
DETHIOBIOTIN-SYN-RXN: (expasy) Dethiobiotin synthase [6.3.3.3]	5.21132e-05	7.86769e-05	4.36667e-05	2.98571e-05	6.56285e-05	9.78311e-05	no
DGDPKIN-RXN: (expasy) Nucleoside-diphosphate kinase [2.7.4.6]	3.65735e-05	2.5354e-05	1.97914e-05	4.64356e-05	4.05027e-05	4.04082e-05	no
DGTPTRIPHYDRO-RXN: (expasy) dGTPase [3.1.5.1]	7.51548e-06	9.39376e-06	1.42053e-05	2.41425e-05	1.45371e-05	7.20643e-05	no
DHBDEHYD-RXN: (expasy) 2,3-dihydro-2,3-dihydroxybenzoate dehydrogenase [1.3.1.28]	3.17134e-07	0	0	1.95018e-07	0	7.62809e-05	no
DHDOGALDOL-RXN: (expasy) 2-dehydro-3-deoxy-D-gluconate aldolase [4.1.2.51]	0	0	0	0	8.98361e-08	0	no
DHHB-METHYLTRANSFER-RXN: (expasy) 3-demethylubiquinol 3-O-methyltransferase [2.1.1.64]	1.62497e-05	1.34668e-05	8.28304e-06	4.28434e-06	9.67936e-06	3.17802e-05	no
DHLAXANAU-RXN: (metacyc) 1,2-dichloroethane dehalogenase [3.8.1.5]	2.29891e-07	0	0	8.35648e-07	4.75323e-06	8.99247e-08	no
DHLBXANAU-RXN: (metacyc) chloroacetate dehalogenase [3.8.1.3]	3.52002e-07	3.01405e-06	2.0708e-05	2.73786e-05	1.07571e-05	7.95721e-06	no
DHSHIKIMATE-DEHYDRO-RXN: (expasy) 3-dehydroshikimate dehydratase [4.2.1.118]	2.03179e-06	0	0	0	3.53752e-06	1.47368e-07	no
DIACYLGLYKIN-RXN: (expasy) Diacylglycerol kinase (ATP) [2.7.1.107]	6.57221e-05	9.13474e-05	5.3878e-05	6.91156e-05	6.46909e-05	7.14038e-05	no
DIAMACTRANS-RXN: (expasy) Diamine N-acetyltransferase [2.3.1.57]	1.21942e-05	2.43709e-05	6.91329e-05	1.47177e-05	1.06568e-05	4.72568e-05	no
DIAMINOPIMDECARB-RXN: (expasy) Diaminopimelate decarboxylase [4.1.1.20]	0.000186531	0.000195977	0.000120977	0.000124493	0.000231869	0.000119802	no
DIAMINOPIMELATE-DEHYDROGENASE-RXN: (expasy) Diaminopimelate dehydrogenase [1.4.1.16]	0.000106134	0.000128175	9.86594e-05	6.13497e-05	0.000117514	8.33449e-05	no
DIAMINOPIMEPIM-RXN: (expasy) Diaminopimelate epimerase [5.1.1.7]	0.000242321	0.000257719	0.000215967	0.000196091	0.000248764	0.000243441	no
DIAMTRANSAM-RXN: (expasy) Diamine transaminase [2.6.1.29]	0	0	0	1.71524e-06	0	1.58429e-06	no
DIENELACHYDRO-RXN: (expasy) Carboxymethylenebutenolidase [3.1.1.45]	1.18944e-07	0	0	0	2.3627e-07	2.12621e-05	no
DIENOYLCOAREDUCT-RXN: (expasy) 2,4-dienoyl-CoA reductase ((2E)-enoyl-CoA-producing) [1.3.1.34]	4.09742e-06	9.31548e-06	7.21169e-06	1.74426e-05	9.79365e-06	6.00599e-05	no
DIHYDLIPACETRANS-RXN: (expasy) Dihydrolipoyllysine-residue acetyltransferase [2.3.1.12]	7.8689e-08	2.2561e-06	8.67299e-08	2.62822e-06	1.69432e-06	4.8933e-05	no
DIHYDRODIPICSYN-RXN: (expasy) 4-hydroxy-tetrahydrodipicolinate synthase [4.3.3.7]	0.000269287	0.000226608	0.000248816	0.000287626	0.000233212	0.000185607	no
DIHYDROFOLATEREDUCT-RXN: (expasy) Dihydrofolate reductase [1.5.1.3]	0.000217583	0.000135762	0.000126502	0.000128298	0.000211011	0.000197708	no
DIHYDROFOLATESYNTH-RXN: (expasy) Dihydrofolate synthase [6.3.2.12]	6.65088e-06	8.82747e-06	6.13372e-06	1.2256e-05	1.78258e-05	5.10881e-06	no
DIHYDROKAEMPFEROL-4-REDUCTASE-RXN: (expasy) Dihydroflavanol 4-reductase [1.1.1.219]	0	0	0	0	0	4.07844e-08	no
DIHYDROOROT-RXN: (expasy) Dihydroorotase [3.5.2.3]	0.000146958	0.000194393	0.000195421	0.000202506	0.000191277	0.000158136	no
DIHYDROOROTATE-DEHYDROGENASE-RXN: (expasy) Dihydroorotate dehydrogenase (quinone) [1.3.5.2]	7.05069e-05	7.08158e-06	5.73034e-06	9.07514e-06	3.42865e-05	3.22702e-05	no
DIHYDROPYRIMIDINASE-RXN: (expasy) Dihydropyrimidinase [3.5.2.2]	2.00071e-05	1.96571e-05	1.28506e-05	1.04131e-05	1.87912e-05	5.07688e-05	no
DIHYDROURACIL-DEHYDROGENASE-NAD+-RXN: (expasy) Dihydrouracil dehydrogenase (NAD(+)) [1.3.1.1]	2.92844e-05	3.40977e-05	2.45573e-05	1.17509e-05	1.18372e-05	5.7199e-05	no
DIHYDROXYISOVALDEHYDRAT-RXN: (expasy) Dihydroxy-acid dehydratase [4.2.1.9]	0.000192947	0.000169844	0.000197656	0.000204268	0.00019715	0.000218963	no
DIHYDROXYMETVALDEHYDRAT-RXN: (metacyc) 2,3-Dihydroxy-3-methylvalerate dehydratase [4.2.1.9]	0.000192947	0.000169844	0.000197656	0.000204268	0.00019715	0.000218963	no
DIMESULFREDUCT-RXN: (expasy) Respiratory dimethylsulfoxide reductase [1.8.5.3]	1.61034e-06	2.83344e-07	1.08602e-07	2.986e-07	1.77485e-06	0.000104805	no
DIMETHUROPORDEHYDROG-RXN: (expasy) Precorrin-2 dehydrogenase [1.3.1.76]	7.31883e-05	9.94717e-05	7.25361e-05	9.20113e-05	8.24613e-05	0.000106757	no
DIMETHYLARGININASE-RXN: (expasy) Dimethylargininase [3.5.3.18]	1.17911e-05	7.7722e-06	7.03692e-06	3.19741e-06	1.45371e-05	2.83444e-06	no
DIMETHYLMALEATE-HYDRATASE-RXN: (expasy) Dimethylmaleate hydratase [4.2.1.85]	4.68086e-05	7.93053e-05	6.67666e-05	7.01221e-05	5.38934e-05	6.4498e-05	no
DIOHBUTANONEPSYN-RXN: (expasy) 3,4-dihydroxy-2-butanone-4-phosphate synthase [4.1.99.12]	9.54045e-05	0.000136465	0.00017392	0.000124437	0.000132622	0.000110286	no
DIPHOSPHOMEVALONTE-DECARBOXYLASE-RXN: (expasy) Diphosphomevalonate decarboxylase [4.1.1.33]	4.5389e-06	3.5515e-07	1.4776e-07	3.21224e-06	1.49027e-05	2.02885e-06	no
DLACTDEHYDROGFAD-RXN: (expasy) D-lactate dehydrogenase (quinone) [1.1.5.12]	4.91176e-07	1.22775e-07	0	3.83695e-07	8.02329e-06	2.71143e-06	no
DLACTDEHYDROGNAD-RXN: (expasy) D-lactate dehydrogenase [1.1.1.28]	5.41326e-05	5.21955e-05	3.47523e-05	1.49658e-05	5.97802e-05	8.76138e-05	no
DMBPPRIBOSYLTRANS-RXN: (expasy) Nicotinate-nucleotide--dimethylbenzimidazole phosphoribosyltransferase [2.4.2.21]	8.5059e-05	0.00011925	0.000133671	0.000121827	0.000119599	0.000137974	no
DMK-RXN: (expasy) 1,4-dihydroxy-2-naphthoate polyprenyltransferase [2.5.1.74]	8.85551e-05	2.22187e-05	3.36981e-05	1.69345e-05	4.43276e-05	4.72977e-05	no
DNA-CYTOSINE-5--METHYLTRANSFERASE-RXN: (expasy) DNA (cytosine-5-)-methyltransferase [2.1.1.37]	0.000249074	0.000204459	0.000199114	0.000328262	0.000173819	0.000212189	no
DNA-DIRECTED-DNA-POLYMERASE-RXN: (expasy) DNA-directed DNA polymerase [2.7.7.7]	0.0012098	0.00129954	0.0011921	0.00136958	0.00127195	0.00139811	no
DNA-DIRECTED-RNA-POLYMERASE-RXN: (expasy) DNA-directed RNA polymerase [2.7.7.6]	0.000900065	0.000841691	0.000795663	0.000989074	0.000924184	0.000922625	no
DNA-LIGASE-NAD+-RXN: (expasy) AMBIGUOUS [6.5.1.2; 6.5.1.6]	0.000150332	0.000198523	0.00018957	0.000205922	0.000180151	0.000250543	no
DSERDEAM-RXN: (expasy) D-serine ammonia-lyase [4.3.1.18]	5.34647e-06	2.35233e-06	8.35621e-06	1.3676e-05	1.89838e-05	6.74955e-05	no
DTDPDEHYDRHAMEPIM-RXN: (expasy) dTDP-4-dehydrorhamnose 3,5-epimerase [5.1.3.13]	0.000151051	0.000197297	0.000205675	0.000168016	0.000186705	0.000145499	no
DTDPDEHYRHAMREDUCT-RXN: (expasy) dTDP-4-dehydrorhamnose reductase [1.1.1.133]	0.000180959	0.000253571	0.000235114	0.000196161	0.000228883	0.000198913	no
DTDPGLUCDEHYDRAT-RXN: (expasy) dTDP-glucose 4,6-dehydratase [4.2.1.46]	0.000232201	0.000198047	0.000219365	0.000198792	0.00023007	0.000221882	no
DTDPGLUCOSEPP-RXN: (expasy) Glucose-1-phosphate thymidylyltransferase [2.7.7.24]	0.000150087	0.000197551	0.000204966	0.000194624	0.000236817	0.000194651	no
DTDPKIN-RXN: (expasy) Nucleoside-diphosphate kinase [2.7.4.6]	3.65735e-05	2.5354e-05	1.97914e-05	4.64356e-05	4.05027e-05	4.04082e-05	no
DTMPKI-RXN: (expasy) AMBIGUOUS [2.7.4.12; 2.7.4.13; 2.7.4.9]	0.000113136	5.71453e-05	4.32393e-05	0.00010442	9.2065e-05	6.11344e-05	no
DUDPKIN-RXN: (expasy) Nucleoside-diphosphate kinase [2.7.4.6]	3.65735e-05	2.5354e-05	1.97914e-05	4.64356e-05	4.05027e-05	4.04082e-05	no
DURIDKI-RXN: (expasy) AMBIGUOUS [2.7.1.145; 2.7.1.21]	6.96984e-05	6.46284e-05	8.62874e-05	7.43477e-05	7.14304e-05	5.36869e-05	no
DUTP-PYROP-RXN: (expasy) AMBIGUOUS [3.6.1.23; 3.6.1.9]	3.30139e-08	0	0	3.25456e-07	0	4.52357e-05	no
DXPREDISOM-RXN: (expasy) 1-deoxy-D-xylulose-5-phosphate reductoisomerase [1.1.1.267]	0.000180051	0.000167702	0.000167094	0.000165401	0.000153127	0.000165911	no
DXS-RXN: (expasy) 1-deoxy-D-xylulose-5-phosphate synthase [2.2.1.7]	0.000282054	0.00040846	0.000388968	0.00039003	0.000297665	0.000312254	no
ENOYL-ACP-REDUCT-NADH-RXN: (expasy) Enoyl-[acyl-carrier-protein] reductase (NADH) [1.3.1.9]	7.82664e-05	1.98064e-05	2.9612e-05	1.6153e-05	6.52928e-05	2.99038e-05	no
ENOYL-COA-DELTA-ISOM-RXN: (expasy) Delta(3)-Delta(2)-enoyl-CoA isomerase [5.3.3.8]	3.77246e-08	0	0	5.9905e-08	1.3328e-07	8.42372e-06	no
ENOYL-COA-HYDRAT-RXN: (expasy) Enoyl-CoA hydratase [4.2.1.17]	2.02549e-05	3.09348e-05	2.50205e-05	2.53466e-05	1.79249e-05	6.11011e-05	no
ENTDB-RXN: (expasy) Holo-[acyl-carrier-protein] synthase [2.7.8.7]	9.72217e-05	4.97474e-05	7.01007e-05	9.03218e-05	9.27079e-05	8.23818e-05	no
ENTMULTI-RXN: (expasy) Enterobactin synthase [6.3.2.14]	7.97745e-08	0	0	0	0	1.44146e-05	no
ENZRXN-201-RXN: (expasy) Alcohol dehydrogenase (NADP(+)) [1.1.1.2]	8.44282e-06	4.67085e-05	1.40222e-05	1.95213e-05	2.36549e-05	1.4971e-05	no
ERYTH4PDEHYDROG-RXN: (expasy) Erythrose-4-phosphate dehydrogenase [1.2.1.72]	1.56561e-07	0	0	1.70797e-07	2.56023e-07	4.15868e-05	no
ERYTHRITOL-KINASE-RXN: (expasy) Erythritol kinase (D-erythritol 4-phosphate-forming) [2.7.1.27]	0	0	0	0	4.40787e-06	0	no
ERYTHRON4PDEHYDROG-RXN: (expasy) 4-phosphoerythronate dehydrogenase [1.1.1.290]	9.95394e-05	7.58021e-05	0.000124126	6.80626e-05	8.86792e-05	0.000127369	no
ERYTHRONOLIDE-SYNTHASE-RXN: (expasy) 6-deoxyerythronolide-B synthase [2.3.1.94]	0	1.85837e-06	0	0	1.2055e-07	0	no
ESTRADIOL-17-BETA-DEHYDROGENASE-RXN: (expasy) 17-beta-estradiol 17-dehydrogenase [1.1.1.62]	0	0	0	0	0	0	no
ETHAMLY-RXN: (expasy) Ethanolamine ammonia-lyase [4.3.1.7]	5.42384e-06	3.64e-06	2.73862e-06	8.12937e-06	2.63196e-05	7.24121e-05	no
EXOPOLYPHOSPHATASE-RXN: (expasy) Exopolyphosphatase [3.6.1.11]	9.21463e-05	3.53413e-05	1.99299e-05	1.28897e-05	5.04985e-05	5.86533e-05	no
F16ALDOLASE-RXN: (expasy) Fructose-bisphosphate aldolase [4.1.2.13]	0.000231158	0.000255019	0.000236535	0.000205352	0.000160263	0.000229929	no
F16BDEPHOS-RXN: (expasy) Fructose-bisphosphatase [3.1.3.11]	0.000125783	0.000163027	0.00018251	0.000181508	0.000132138	0.000249771	no
FADSYN-RXN: (expasy) FAD synthase [2.7.7.2]	0.000196306	0.000169881	0.000173652	0.000194801	0.000178957	0.000141802	no
FARNESYLTRANSTRANSFERASE-RXN: (expasy) Geranylgeranyl diphosphate synthase [2.5.1.29]	1.13994e-05	1.21912e-05	1.19602e-05	1.37229e-05	1.73475e-05	3.53972e-06	no
FATTY-ACID-SYNTHASE-RXN: (expasy) Fatty-acid synthase system [2.3.1.85]	2.35567e-05	0	1.00228e-06	4.65288e-08	7.62336e-08	8.09282e-07	no
FATTY-ACYL-COA-SYNTHASE-RXN: (expasy) Fatty-acyl-CoA synthase system [2.3.1.86]	1.46276e-05	6.62411e-06	7.53358e-06	1.53837e-06	2.09585e-06	1.71089e-06	yes
FERREDOXIN--NAD+-REDUCTASE-RXN: (expasy) Ferredoxin--NAD(+) reductase [1.18.1.3]	4.89965e-07	7.17031e-07	5.67604e-08	4.07671e-06	8.61927e-08	3.5481e-05	no
FERREDOXIN--NITRITE-REDUCTASE-RXN: (expasy) Ferredoxin--nitrite reductase [1.7.7.1]	0	0	1.607e-07	0	3.94104e-08	3.00815e-07	no
FERRIC-CHELATE-REDUCTASE-RXN: (expasy) Ferric-chelate reductase (NADH) [1.16.1.7]	4.1989e-08	0	0	0	0	0	no
FGAMSYN-RXN: (expasy) Phosphoribosylformylglycinamidine synthase [6.3.5.3]	0.00012085	0.000160496	0.000174032	0.000158321	0.000197815	0.000190573	no
FLAVONADPREDUCT-RXN: (expasy) Flavodoxin--NADP(+) reductase [1.19.1.1]	8.56776e-08	0	0	3.71827e-08	0	1.11658e-05	no
FMNREDUCT-RXN: (expasy) FMN reductase (NAD(P)H) [1.5.1.39]	3.28564e-05	0.000108907	6.25949e-05	6.03408e-05	8.50098e-05	7.21396e-05	no
FOLYLPOLYGLUTAMATESYNTH-RXN: (expasy) Tetrahydrofolate synthase [6.3.2.17]	7.78884e-05	0.000174266	8.8604e-05	8.45471e-05	0.000116914	0.000124874	no
FORMALDEHYDE-DEHYDROGENASE-RXN: (expasy) Formaldehyde dehydrogenase [1.2.1.46]	3.0261e-07	0	0	0	1.90923e-06	1.9816e-06	no
FORMALDEHYDE-TRANSKETOLASE-RXN: (expasy) Formaldehyde transketolase [2.2.1.3]	8.88863e-08	0	8.67769e-08	0	7.8597e-06	0	no
FORMAMIDASE-RXN: (expasy) Formamidase [3.5.1.49]	3.85301e-06	1.77245e-06	4.1734e-07	1.40645e-06	3.88363e-05	9.92269e-08	no
FORMATE-DEHYDROGENASE-CYTOCHROME-RXN: (expasy) Formate dehydrogenase (cytochrome) [1.2.2.1]	0	0	0	0	0	4.1082e-08	no
FORMATEDEHYDROG-RXN: (metacyc) formate dehydrogenase (menaquinone) [1.17.5.3]	5.8584e-08	5.56021e-07	0	2.20585e-07	3.32835e-07	2.44063e-05	no
FORMATETHFLIG-RXN: (expasy) Formate--tetrahydrofolate ligase [6.3.4.3]	0.000267239	0.000286386	0.000216534	0.000230531	0.000209127	0.000206846	no
FORMIMINOGLUTAMASE-RXN: (expasy) Formimidoylglutamase [3.5.3.8]	3.51651e-06	7.38301e-07	1.36478e-07	3.5467e-06	6.55297e-07	1.32924e-05	no
FORMYLTHFDEFORMYL-RXN: (expasy) Formyltetrahydrofolate deformylase [3.5.1.10]	2.00392e-05	1.106e-05	1.7991e-05	5.12072e-06	7.79394e-06	2.75956e-05	no
FORMYLTHFGLUSYNTH-RXN: (expasy) Tetrahydrofolate synthase [6.3.2.17]	7.78884e-05	0.000174266	8.8604e-05	8.45471e-05	0.000116914	0.000124874	no
FPPSYN-RXN: (expasy) (2E,6E)-farnesyl diphosphate synthase [2.5.1.10]	4.77819e-05	0.000101375	6.97453e-05	4.50491e-05	7.01356e-05	7.11095e-05	no
FRUCTOKINASE-RXN: (expasy) Fructokinase [2.7.1.4]	6.59058e-05	1.8672e-05	2.37823e-05	3.14602e-05	1.90792e-05	5.67385e-05	no
FRUCTOSE-6-PHOSPHATE-PHOSPHOKETOLASE-RXN: (expasy) Fructose-6-phosphate phosphoketolase [4.1.2.22]	4.80036e-05	1.57019e-06	1.86063e-06	1.11296e-05	1.37421e-05	6.34287e-06	no
FTRMBARK-RXN: (expasy) Formylmethanofuran--tetrahydromethanopterin N-formyltransferase [2.3.1.101]	6.81562e-08	0	0	9.7168e-06	6.04896e-06	0	no
FUC4NACTRANS-RXN: (expasy) TDP-N-acetylfucosamine:lipid II N-acetylfucosaminyltransferase [2.4.1.325]	0	0	0	0	1.80572e-07	1.07098e-05	no
FUCISOM-RXN: (expasy) L-fucose isomerase [5.3.1.25]	5.22682e-05	8.17047e-05	7.58312e-05	4.40147e-05	8.30367e-05	8.63633e-05	no
FUCOKINASE-RXN: (expasy) Fucokinase [2.7.1.52]	4.15535e-08	0	0	0	0	5.26823e-06	no
FUCPALDOL-RXN: (expasy) L-fuculose-phosphate aldolase [4.1.2.17]	1.95552e-05	9.627e-05	4.77396e-05	2.73634e-05	4.51577e-05	6.25129e-05	no
FUCULOKIN-RXN: (expasy) L-fuculokinase [2.7.1.51]	1.37171e-05	1.38092e-05	5.17884e-06	1.51068e-05	2.50877e-05	5.07391e-05	no
FUMARATE-REDUCTASE-NADH-RXN: (expasy) Fumarate reductase (NADH) [1.3.1.6]	5.72433e-06	0	9.57473e-07	7.03578e-07	1.01107e-05	1.03894e-06	no
FUMARYLACETOACETASE-RXN: (expasy) Fumarylacetoacetase [3.7.1.2]	1.33567e-07	6.84539e-08	0	1.37801e-07	0	5.65061e-07	no
FUMHYDR-RXN: (expasy) Fumarate hydratase [4.2.1.2]	0.000105563	0.000167093	0.000136978	9.31178e-05	0.000136194	0.000214373	no
GABATRANSAM-RXN: (expasy) 4-aminobutyrate--2-oxoglutarate transaminase [2.6.1.19]	1.35335e-05	0	2.01553e-06	1.64926e-06	1.40708e-05	5.45143e-05	no
GALACTARDEHYDRA-RXN: (expasy) Galactarate dehydratase [4.2.1.42]	2.08957e-05	2.27941e-05	4.99371e-05	3.61495e-05	1.5888e-05	0.000137121	no
GALACTOACETYLTRAN-RXN: (expasy) Galactoside O-acetyltransferase [2.3.1.18]	8.12326e-05	6.42053e-05	3.41674e-05	6.25258e-05	4.99229e-05	5.42168e-05	no
GALACTOKIN-RXN: (expasy) Galactokinase [2.7.1.6]	8.83857e-05	0.000117317	8.93606e-05	8.43673e-05	0.000107433	0.000108545	no
GALACTONDEHYDRAT-RXN: (expasy) AMBIGUOUS [4.2.1.140; 4.2.1.6]	5.17559e-06	3.54408e-06	3.65049e-06	7.8236e-06	5.07421e-06	4.6878e-05	no
GALACTURAN-14-ALPHA-GALACTURONIDASE-RXN: (expasy) Galacturonan 1,4-alpha-galacturonidase [3.2.1.67]	1.76976e-06	2.8972e-07	3.60786e-08	7.07844e-07	1.14392e-06	0	no
GALACTURIDYLYLTRANS-RXN: (expasy) UDP-glucose--hexose-1-phosphate uridylyltransferase [2.7.7.12]	0.000164437	0.00019358	0.000166533	0.000161769	0.000158315	0.000156253	no
GALACTUROISOM-RXN: (expasy) Glucuronate isomerase [5.3.1.12]	6.62358e-05	8.43254e-05	0.00010821	0.000112344	6.86378e-05	0.000122661	no
GALLATE-DECARBOXYLASE-RXN: (expasy) Gallate decarboxylase [4.1.1.59]	0	0	0	0	2.91164e-07	0	no
GALPMUT-RXN: (expasy) UDP-galactopyranose mutase [5.4.99.9]	9.96749e-05	0.000146931	0.000113996	0.000121769	0.000116811	9.90302e-05	no
GAMMA-GLUTAMYLTRANSFERASE-RXN: (expasy) Gamma-glutamyltransferase [2.3.2.2]	1.78091e-06	1.97712e-06	6.34223e-07	2.26924e-06	2.36927e-06	6.91269e-05	no
GAPDHSYNEC-RXN: (expasy) Glyceraldehyde-3-phosphate dehydrogenase (NAD(P)(+)) (phosphorylating) [1.2.1.59]	2.45966e-07	0	0	7.96794e-06	5.94385e-06	1.46822e-07	no
GAPOXNPHOSPHN-RXN: (expasy) Glyceraldehyde-3-phosphate dehydrogenase (phosphorylating) [1.2.1.12]	6.94052e-05	7.14337e-06	8.13357e-06	3.36197e-05	1.19537e-05	6.65818e-05	no
GART-RXN: (expasy) Phosphoribosylglycinamide formyltransferase 1 [2.1.2.2]	0.00013302	0.000190806	0.000185975	0.000197036	0.000190858	0.000172985	no
GCVP-RXN: (expasy) Glycine dehydrogenase (aminomethyl-transferring) [1.4.4.2]	4.11353e-05	3.01986e-05	2.94229e-05	3.95325e-05	7.90421e-05	9.62726e-05	no
GCVT-RXN: (expasy) Aminomethyltransferase [2.1.2.10]	4.61018e-05	2.54471e-05	3.13739e-05	3.07565e-05	6.52418e-05	6.62272e-05	no
GDP-6-DEOXY-D-TALOSE-4-DEHYDROGENASE-RXN: (expasy) AMBIGUOUS [1.1.1.135; 1.1.1.187]	0	3.20964e-07	0	0	0	0	no
GDP-MANNOSE-6-DEHYDROGENASE-RXN: (expasy) GDP-mannose 6-dehydrogenase [1.1.1.132]	5.72927e-06	9.87163e-07	6.44888e-06	2.18226e-06	7.72642e-07	8.81905e-06	no
GDPKIN-RXN: (expasy) Nucleoside-diphosphate kinase [2.7.4.6]	3.65735e-05	2.5354e-05	1.97914e-05	4.64356e-05	4.05027e-05	4.04082e-05	no
GDPMANDEHYDRA-RXN: (expasy) GDP-mannose 4,6-dehydratase [4.2.1.47]	4.39953e-05	7.34674e-05	6.90325e-05	3.31065e-05	7.85849e-05	3.90124e-05	no
GDPPYPHOSKIN-RXN: (expasy) GTP diphosphokinase [2.7.6.5]	0.000273657	0.000346655	0.000204495	0.00017336	0.000256705	0.000195683	no
GDPREDUCT-RXN: (expasy) Ribonucleoside-diphosphate reductase [1.17.4.1]	0.000295408	6.9621e-05	5.71011e-05	7.42745e-05	0.000179272	0.000237276	no
GENTISATE-12-DIOXYGENASE-RXN: (expasy) Gentisate 1,2-dioxygenase [1.13.11.4]	0	0	0	0	0	0	no
GKI-RXN: (expasy) Glycerate 2-kinase [2.7.1.165]	1.27683e-06	8.11993e-07	5.06711e-07	2.81694e-07	9.1199e-07	2.08798e-05	no
GLCNACPTRANS-RXN: (expasy) N-acetylglucosaminephosphotransferase [2.7.8.33]	1.28029e-05	7.7656e-06	1.36189e-05	1.91197e-05	2.65913e-05	4.60515e-05	no
GLU6PDEHYDROG-RXN: (expasy) Glucose-6-phosphate dehydrogenase (NADP(+)) [1.1.1.49]	0.000111651	1.35584e-05	2.10521e-05	1.37896e-05	3.40287e-05	5.73184e-05	no
GLUC1PADENYLTRANS-RXN: (expasy) Glucose-1-phosphate adenylyltransferase [2.7.7.27]	0.000301061	0.000454926	0.000406329	0.000398794	0.000336652	0.00039708	no
GLUC1PURIDYLTRANS-RXN: (expasy) AMBIGUOUS [2.7.7.64; 2.7.7.9]	9.28168e-05	4.2255e-05	2.2096e-05	6.91228e-05	4.87248e-05	8.663e-05	no
GLUCARDEHYDRA-RXN: (expasy) Glucarate dehydratase [4.2.1.40]	1.86136e-06	2.91975e-06	2.45023e-06	1.53637e-06	4.29454e-06	3.38272e-05	no
GLUCISOM-RXN: (metacyc) glucose isomerase [5.3.1.5]	0.000109116	1.44605e-05	2.52991e-05	2.08083e-05	2.61815e-05	6.71782e-05	no
GLUCOKIN-RXN: (expasy) AMBIGUOUS [2.7.1.1; 2.7.1.2]	0.000131788	0.00013336	0.000106603	0.000128242	8.8027e-05	0.000124467	no
GLUCONATE-2-DEHYDROGENASE-RXN: (expasy) Gluconate 2-dehydrogenase (acceptor) [1.1.99.3]	0	0	0	0	0	0	no
GLUCONATE-5-DEHYDROGENASE-RXN: (expasy) Gluconate 5-dehydrogenase [1.1.1.69]	1.66503e-05	3.12835e-05	3.92516e-05	3.45145e-05	3.36562e-05	1.35275e-05	no
GLUCONATE-DEHYDRATASE-RXN: (expasy) AMBIGUOUS [4.2.1.140; 4.2.1.39]	1.26583e-07	0	0	0	0	0	no
GLUCONOKIN-RXN: (expasy) Gluconokinase [2.7.1.12]	0.000105916	2.71176e-06	2.62146e-06	4.86487e-06	5.65835e-06	9.86062e-06	no
GLUCONOLACT-RXN: (expasy) Gluconolactonase [3.1.1.17]	1.7868e-06	0	3.56913e-08	0	1.05905e-06	1.36269e-07	no
GLUCOSAMINE-6-P-DEAMIN-RXN: (expasy) Glucosamine-6-phosphate deaminase [3.5.99.6]	0.000233965	0.000234725	0.000260888	0.000187308	0.000208708	0.000266391	no
GLUCOSAMINEPNACETYLTRANS-RXN: (expasy) Glucosamine-phosphate N-acetyltransferase [2.3.1.4]	0	0	0	0	8.08321e-06	0	no
GLUCOSE-1-DEHYDROGENASE-RXN: (expasy) Glucose 1-dehydrogenase (NAD(P)(+)) [1.1.1.47]	1.20082e-05	3.99186e-05	2.85754e-06	4.39317e-06	1.87588e-05	1.06896e-05	no
GLUCOSE-1-PHOSPHAT-RXN: (expasy) Glucose-1-phosphatase [3.1.3.10]	2.61435e-07	4.61359e-07	2.37191e-08	0	0	3.68749e-05	no
GLUCOSE-1-PHOSPHATE-PHOSPHODISMUTASE-RXN: (expasy) Glucose-1-phosphate phosphodismutase [2.7.1.41]	2.66476e-07	3.7769e-07	0	3.50085e-06	6.60262e-06	0	no
GLUCOSE-6-PHOSPHATE-1-EPIMERASE-RXN: (expasy) Glucose-6-phosphate 1-epimerase [5.1.3.15]	8.41522e-05	9.74323e-07	1.23849e-06	2.3981e-07	0	2.81567e-05	no
GLUCOSYLCERAMIDASE-RXN: (expasy) Glucosylceramidase [3.2.1.45]	6.99703e-08	1.07401e-07	6.53207e-07	3.25027e-06	0	2.66842e-07	no
GLUCUROISOM-RXN: (expasy) Glucuronate isomerase [5.3.1.12]	6.62358e-05	8.43254e-05	0.00010821	0.000112344	6.86378e-05	0.000122661	no
GLURS-RXN: (expasy) Glutamate--tRNA ligase [6.1.1.17]	0.000212618	0.000184058	0.000187403	0.000216407	0.00020793	0.000187152	no
GLUTACONATE-COA-TRANSFERASE-RXN: (expasy) Glutaconate CoA-transferase [2.8.3.12]	3.87245e-07	8.87479e-07	1.2174e-06	9.44475e-08	5.52498e-07	1.23392e-06	no
GLUTAMATE-DEHYDROGENASE-NADP+-RXN: (expasy) Glutamate dehydrogenase (NAD(P)(+)) [1.4.1.3]	2.05355e-05	1.23103e-05	1.95535e-05	4.49828e-06	6.71355e-06	4.50796e-06	no
GLUTAMATE-DEHYDROGENASE-RXN: (expasy) Glutamate dehydrogenase [1.4.1.2]	2.16443e-05	1.22091e-05	2.04047e-05	5.31352e-06	7.01241e-06	4.78808e-06	no
GLUTAMATE-FORMIMINOTRANSFERASE-RXN: (expasy) Glutamate formimidoyltransferase [2.1.2.5]	1.91738e-05	1.22514e-05	1.62322e-05	5.88311e-06	1.39564e-05	5.04127e-06	no
GLUTAMATE-N-ACETYLTRANSFERASE-RXN: (expasy) Glutamate N-acetyltransferase [2.3.1.35]	0.000139305	0.00018185	0.000167835	0.000194509	0.000164049	0.000135701	no
GLUTAMATE-SYNTHASE-FERREDOXIN-RXN: (expasy) Glutamate synthase (ferredoxin) [1.4.7.1]	1.13753e-05	3.49964e-05	2.2583e-05	2.93756e-05	3.43056e-05	3.11008e-05	no
GLUTAMATE-SYNTHASE-NADH-RXN: (expasy) Glutamate synthase (NADH) [1.4.1.14]	3.97616e-05	6.04649e-05	0.000111346	6.91144e-05	3.59245e-05	3.05493e-05	no
GLUTAMATESYN-RXN: (expasy) Glutamate synthase (NADPH) [1.4.1.13]	0.000197565	0.000294022	0.000274808	0.000245338	0.000227988	0.000367835	no
GLUTAMIDOTRANS-RXN: (expasy) Imidazole glycerol-phosphate synthase [4.3.2.10]	0.000348132	0.000356273	0.000339478	0.000371983	0.000365443	0.00027868	no
GLUTAMIN-RXN: (expasy) AMBIGUOUS [3.5.1.2; 3.5.1.38]	0.000345126	0.000318318	0.000277135	0.00034091	0.000336068	0.000282814	no
GLUTAMINE--TRNA-LIGASE-RXN: (expasy) Glutamine--tRNA ligase [6.1.1.18]	0.000114595	0.000173985	0.000180271	0.000163249	0.000164698	0.000160564	no
GLUTAMINESYN-RXN: (expasy) Glutamine synthetase [6.3.1.2]	0.000301892	0.000300118	0.000256322	0.000216981	0.000237179	0.00027166	no
GLUTARATE-SEMIALDEHYDE-DEHYDROGENASE-RXN: (expasy) Glutarate-semialdehyde dehydrogenase [1.2.1.20]	5.20416e-06	0	0	0	1.37709e-07	0	no
GLUTARYL-COA-DEHYDROGENASE-RXN: (expasy) Glutaryl-CoA dehydrogenase (ETF) [1.3.8.6]	0	0	0	2.61125e-07	1.19373e-06	0	no
GLUTATHIONE-PEROXIDASE-RXN: (expasy) Glutathione peroxidase [1.11.1.9]	1.77447e-07	0	0	7.56051e-08	8.45324e-08	7.1804e-06	no
GLUTATHIONE-REDUCT-NADPH-RXN: (expasy) Glutathione-disulfide reductase [1.8.1.7]	6.0476e-06	2.99981e-06	1.54799e-07	1.39381e-05	1.96661e-05	4.11229e-05	no
GLUTATHIONE-SYN-RXN: (expasy) Glutathione synthase [6.3.2.3]	2.20879e-06	1.69956e-06	1.84734e-06	1.20608e-05	1.08907e-05	4.85798e-05	no
GLUTCYSLIG-RXN: (expasy) Glutamate--cysteine ligase [6.3.2.2]	7.17463e-05	1.68481e-05	1.0911e-05	3.36267e-05	4.69539e-05	7.25719e-05	no
GLUTDECARBOX-RXN: (expasy) Glutamate decarboxylase [4.1.1.15]	2.97443e-05	1.66525e-05	2.66435e-05	1.839e-05	5.9873e-05	3.45679e-05	no
GLUTDEHYD-RXN: (expasy) Glutamate dehydrogenase (NADP(+)) [1.4.1.4]	5.20812e-07	6.92448e-07	0	3.97212e-07	4.39798e-07	4.92645e-05	no
GLUTKIN-RXN: (expasy) Glutamate 5-kinase [2.7.2.11]	0.000170265	0.000150179	0.000157017	0.00018717	0.000173217	0.000150128	no
GLUTRACE-RXN: (expasy) Glutamate racemase [5.1.1.3]	0.000208147	0.00022543	0.000204754	0.000204166	0.00017108	0.000183439	no
GLUTRNAREDUCT-RXN: (expasy) Glutamyl-tRNA reductase [1.2.1.70]	7.19081e-05	8.75349e-05	5.47281e-05	8.82797e-05	9.20628e-05	0.000102464	no
GLUTSEMIALDEHYDROG-RXN: (expasy) Glutamate-5-semialdehyde dehydrogenase [1.2.1.41]	0.000161772	0.000145281	0.00015574	0.000178783	0.000158956	0.000151795	no
GLY-X-CARBOXYPEPTIDASE-RXN: (expasy) Gly-Xaa carboxypeptidase [3.4.17.4]	0	0	1.8416e-07	0	0	2.47565e-07	no
GLY3KIN-RXN: (expasy) Glycerate 3-kinase [2.7.1.31]	9.08271e-05	0.000122776	6.53927e-05	5.23474e-05	7.70348e-05	0.000112977	no
GLYC3PDEHYDROG-RXN: (expasy) Glycerol-3-phosphate dehydrogenase [1.1.5.3]	3.53942e-06	8.40985e-06	1.31283e-05	7.64677e-06	7.33366e-06	0.000164033	no
GLYC3PDEHYDROGBIOSYN-RXN: (expasy) Glycerol-3-phosphate dehydrogenase (NAD(P)(+)) [1.1.1.94]	0.000205972	0.00018345	0.000192745	0.0001919	0.000193565	0.00016844	no
GLYCDEH-RXN: (expasy) Glycerol dehydrogenase [1.1.1.6]	4.74872e-05	9.44403e-05	6.1026e-05	8.88093e-05	5.6138e-05	0.000130206	no
GLYCERATE-DEHYDROGENASE-RXN: (expasy) Glycerate dehydrogenase [1.1.1.29]	2.47979e-05	5.08595e-05	2.24687e-05	2.56555e-05	4.49469e-05	1.15355e-05	no
GLYCEROL-1-PHOSPHATASE-RXN: (expasy) Glycerol-1-phosphatase [3.1.3.21]	0	0	0	2.2547e-08	0	1.41561e-05	no
GLYCEROL-2-DEHYDROGENASE-NADP+-RXN: (expasy) Glycerol 2-dehydrogenase (NADP(+)) [1.1.1.156]	0	0	0	0	4.69217e-07	0	no
GLYCEROL-3-PHOSPHATE-OXIDASE-RXN: (expasy) Glycerol-3-phosphate oxidase [1.1.3.21]	4.95733e-06	1.66039e-07	9.93923e-08	1.80078e-06	2.78991e-06	1.02943e-06	no
GLYCEROL-DEHYDRATASE-RXN: (expasy) Glycerol dehydratase [4.2.1.30]	1.63069e-05	6.6204e-06	3.63338e-06	7.49813e-06	1.37849e-05	1.29491e-05	no
GLYCEROL-KIN-RXN: (expasy) Glycerol kinase [2.7.1.30]	0.000234305	0.000257666	0.000182833	0.000184894	0.000224444	0.000230116	no
GLYCERONE-KINASE-RXN: (expasy) Glycerone kinase [2.7.1.29]	8.36027e-06	1.47841e-05	9.81235e-06	4.82949e-06	1.25276e-05	3.19496e-06	no
GLYCINE--TRNA-LIGASE-RXN: (expasy) Glycine--tRNA ligase [6.1.1.14]	0.00020933	0.000195991	0.000168344	0.000231102	0.000207117	0.000233095	no
GLYCINE-AMIDINOTRANSFERASE-RXN: (expasy) Glycine amidinotransferase [2.1.4.1]	5.79467e-06	1.60641e-06	3.47895e-06	1.21497e-06	5.33478e-06	2.4644e-06	no
GLYCOGEN-BRANCH-RXN: (expasy) 1,4-alpha-glucan branching enzyme [2.4.1.18]	0.000253663	0.000360972	0.00031922	0.000314434	0.000266374	0.000267874	no
GLYCOGENSYN-RXN: (expasy) Starch synthase [2.4.1.21]	0.000133925	0.000242556	0.000226801	0.00021367	0.00019651	0.00019752	no
GLYCOLALD-DEHYDROG-RXN: (expasy) Glycolaldehyde dehydrogenase [1.2.1.21]	0	0	0	0	2.9299e-07	4.8001e-06	no
GLYCOLALDREDUCT-RXN: (expasy) Lactaldehyde reductase [1.1.1.77]	9.5868e-05	7.0201e-05	9.90465e-05	7.90196e-05	3.47166e-05	8.50687e-05	no
GLYCOLATE-REDUCTASE-RXN: (expasy) Glyoxylate reductase [1.1.1.26]	4.0253e-07	1.19233e-07	4.41092e-07	1.29938e-07	7.85225e-06	0	no
GLYCOLATEDEHYDRO-RXN: (expasy) Glycolate dehydrogenase [1.1.99.14]	0	4.39893e-07	0	0	0	2.46824e-06	no
GLYCOPHOSPHORYL-RXN: (expasy) Glycogen phosphorylase [2.4.1.1]	0.00033562	0.000379942	0.000350601	0.000351765	0.000270563	0.000394158	no
GLYCPDIESTER-RXN: (expasy) Glycerophosphodiester phosphodiesterase [3.1.4.46]	8.20486e-05	0.00012032	0.000101899	7.74581e-05	0.00011177	0.000143897	no
GLYMALTOPHOSPHORYL-RXN: (expasy) Glycogen phosphorylase [2.4.1.1]	0.00033562	0.000379942	0.000350601	0.000351765	0.000270563	0.000394158	no
GLYOCARBOLIG-RXN: (expasy) Tartronate-semialdehyde synthase [4.1.1.47]	3.94703e-07	0	0	0	3.09298e-07	6.14278e-05	no
GLYOHMETRANS-RXN: (expasy) Glycine hydroxymethyltransferase [2.1.2.1]	0.000174728	0.000139253	0.000135585	0.000156458	0.000186771	0.000143588	no
GLYOXI-RXN: (expasy) Lactoylglutathione lyase [4.4.1.5]	4.40807e-05	0.000130365	0.000104247	8.83252e-05	7.51581e-05	8.00509e-05	no
GLYOXII-RXN: (expasy) Hydroxyacylglutathione hydrolase [3.1.2.6]	1.04084e-05	3.9884e-06	1.99368e-06	4.24442e-06	1.82995e-05	2.98922e-05	no
GLYOXIII-RXN: (expasy) D-lactate dehydratase [4.2.1.130]	8.76892e-06	5.00808e-06	0	0	3.1928e-06	1.96784e-05	no
GLYOXYLATE-REDUCTASE-NADP+-RXN: (expasy) Glyoxylate reductase (NADP(+)) [1.1.1.79]	7.05203e-05	1.57392e-05	1.07401e-05	3.62572e-06	1.73552e-06	8.88947e-05	no
GLYRIBONUCSYN-RXN: (expasy) Phosphoribosylamine--glycine ligase [6.3.4.13]	0.000189822	0.000181263	0.000185541	0.000210084	0.000190369	0.000221511	no
GMP-REDUCT-RXN: (expasy) GMP reductase [1.7.1.7]	1.35403e-05	1.05491e-06	7.70481e-07	4.42158e-06	2.51635e-05	3.8833e-05	no
GMP-SYN-GLUT-RXN: (expasy) GMP synthase (glutamine-hydrolyzing) [6.3.5.2]	0.000259748	0.000234482	0.000225843	0.000262266	0.00027372	0.000256362	no
GPH-RXN: (expasy) Phosphoglycolate phosphatase [3.1.3.18]	8.49692e-05	0.000173041	0.000100441	0.000112602	0.000106195	0.000123018	no
GPPSYN-RXN: (expasy) Dimethylallyltranstransferase [2.5.1.1]	1.03352e-05	9.49232e-06	7.84239e-06	3.08924e-06	7.38818e-06	1.1291e-05	no
GSAAMINOTRANS-RXN: (expasy) Glutamate-1-semialdehyde 2,1-aminomutase [5.4.3.8]	7.04436e-05	8.97799e-05	5.83328e-05	9.73236e-05	9.20209e-05	8.70148e-05	no
GSADENYLATION-RXN: (expasy) [Glutamine synthetase] adenylyltransferase [2.7.7.42]	1.51415e-05	1.82319e-06	4.88039e-07	2.76401e-06	9.52968e-07	4.5244e-05	no
GSDEADENYLATION-RXN: (expasy) [Glutamine synthetase]-adenylyl-L-tyrosine phosphorylase [2.7.7.89]	1.50756e-05	1.76077e-06	4.88039e-07	2.74675e-06	9.52968e-07	2.75449e-05	no
GSHTRAN-RXN: (expasy) Glutathione transferase [2.5.1.18]	2.38683e-07	0	0	7.29211e-07	5.72216e-07	9.75709e-05	no
GSPAMID-RXN: (expasy) Glutathionylspermidine amidase [3.5.1.78]	7.44472e-07	2.52254e-07	0	4.94593e-08	2.71585e-07	4.55194e-05	no
GSPSYN-RXN: (expasy) AMBIGUOUS [6.3.1.8; 6.3.1.9]	2.00331e-08	2.52254e-07	0	0	1.90917e-07	6.17625e-06	no
GST-RXN: (expasy) Glutathione transferase [2.5.1.18]	2.38683e-07	0	0	7.29211e-07	5.72216e-07	9.75709e-05	no
GTP-CYCLOHYDRO-I-RXN: (expasy) GTP cyclohydrolase I [3.5.4.16]	0.000151454	0.000139585	0.000119372	0.000104506	0.000158564	0.000165999	no
GTP-CYCLOHYDRO-II-RXN: (expasy) GTP cyclohydrolase II [3.5.4.25]	9.35268e-05	0.000124433	0.000160605	0.000114395	0.00012517	0.000104465	no
GTPPYPHOSKIN-RXN: (expasy) GTP diphosphokinase [2.7.6.5]	0.000273657	0.000346655	0.000204495	0.00017336	0.000256705	0.000195683	no
GUANIDINOBUTANAMIDE-NH3-RXN: (expasy) Amidase [3.5.1.4]	1.3378e-05	4.31078e-05	1.66354e-05	1.42579e-05	3.13832e-05	1.22475e-06	no
GUANIDINOBUTYRASE-RXN: (expasy) Guanidinobutyrase [3.5.3.7]	9.67826e-07	1.18991e-06	2.88188e-07	7.8761e-06	8.89625e-07	7.71262e-07	no
GUANINE-DEAMINASE-RXN: (expasy) Guanine deaminase [3.5.4.3]	6.23822e-05	6.79227e-05	2.89602e-05	2.60009e-05	5.0563e-05	5.78663e-05	no
GUANOSINEKIN-RXN: (expasy) Inosine kinase [2.7.1.73]	3.29078e-07	0	0	7.80471e-08	2.64735e-07	5.17871e-05	no
GUANPRIBOSYLTRAN-RXN: (expasy) Hypoxanthine phosphoribosyltransferase [2.4.2.8]	0.000238821	0.000229074	0.000206737	0.000231863	0.000223106	0.000193811	no
GUANYL-KIN-RXN: (expasy) Guanylate kinase [2.7.4.8]	0.000202704	0.00028616	0.000229446	0.000208935	0.000258891	0.000230992	no
H2-METHYLENE-THMPT-DEHYDRO-RXN: (expasy) 5,10-methenyltetrahydromethanopterin hydrogenase [1.12.98.2]	0	0	0	9.52149e-06	1.2819e-05	0	no
H2NEOPTERINALDOL-RXN: (expasy) Dihydroneopterin aldolase [4.1.2.25]	0.000145823	0.000126702	0.000101258	0.000100884	0.000140363	0.000211102	no
H2NEOPTERINP3PYROPHOSPHOHYDRO-RXN: (expasy) Dihydroneopterin triphosphate diphosphatase [3.6.1.67]	0	0	0	0	6.50888e-08	2.96844e-06	no
H2NTPEPIM-RXN: (expasy) Dihydroneopterin triphosphate 2'-epimerase [5.1.99.7]	0	0	0	0	0	0	no
H2PTERIDINEPYROPHOSPHOKIN-RXN: (expasy) 2-amino-4-hydroxy-6-hydroxymethyldihydropteridine diphosphokinase [2.7.6.3]	3.22952e-05	2.26559e-05	2.24034e-05	1.68087e-05	2.86164e-05	2.83385e-05	no
H2PTEROATESYNTH-RXN: (expasy) Dihydropteroate synthase [2.5.1.15]	0.00013062	0.000117208	8.83497e-05	8.82983e-05	0.000121841	0.000137592	no
HALOACETATE-DEHALOGENASE-RXN: (expasy) Haloacetate dehalogenase [3.8.1.3]	3.52002e-07	3.01405e-06	2.0708e-05	2.73786e-05	1.07571e-05	7.95721e-06	no
HALOALKANE-DEHALOGENASE-RXN: (expasy) Haloalkane dehalogenase [3.8.1.5]	2.29891e-07	0	0	8.35648e-07	4.75323e-06	8.99247e-08	no
HCAMULTI-RXN: (expasy) 3-phenylpropanoate dioxygenase [1.14.12.19]	3.46225e-07	0	0	1.66831e-07	0	6.31274e-05	no
HEME-OXYGENASE-DECYCLIZING-RXN: (expasy) Heme oxygenase (biliverdin-producing) [1.14.14.18]	0	0	0	2.15503e-07	0	1.56045e-06	no
HEMEOSYN-RXN: (metacyc) heme o biosynthesis [2.5.1.141]	3.84307e-08	0	0	0	3.98012e-07	2.49975e-05	no
HEMN-RXN: (expasy) Coproporphyrinogen dehydrogenase [1.3.98.3]	1.01158e-05	1.97875e-05	2.75181e-05	3.76393e-05	1.38815e-05	7.74188e-05	no
HEXOKINASE-RXN: (expasy) Hexokinase [2.7.1.1]	2.29616e-07	0	0	0	3.69234e-07	0	no
HIPPURATE-HYDROLASE-RXN: (expasy) Hippurate hydrolase [3.5.1.32]	8.62583e-06	1.69042e-05	9.59421e-06	7.59974e-06	9.47328e-07	3.17101e-07	no
HISTAMINOTRANS-RXN: (expasy) Histidinol-phosphate transaminase [2.6.1.9]	0.000146637	0.000199078	0.000200836	0.000185705	0.000182997	0.000153658	no
HISTCYCLOHYD-RXN: (expasy) Phosphoribosyl-AMP cyclohydrolase [3.5.4.19]	0.000177972	0.000169831	0.000173734	0.000177885	0.000184633	0.000138425	no
HISTIDINE--TRNA-LIGASE-RXN: (expasy) Histidine--tRNA ligase [6.1.1.21]	0.000158866	0.000145001	0.000142837	0.000168065	0.000184334	0.000144145	no
HISTIDINE-AMMONIA-LYASE-RXN: (expasy) Histidine ammonia-lyase [4.3.1.3]	5.23746e-05	1.87252e-05	2.77394e-05	1.34437e-05	4.28327e-05	1.93732e-05	no
HISTIDINE-DECARBOXYLASE-RXN: (expasy) Histidine decarboxylase [4.1.1.22]	0	0	0	1.2992e-07	0	0	no
HISTIDPHOS-RXN: (expasy) Histidinol-phosphatase [3.1.3.15]	5.1732e-05	4.82046e-05	8.01408e-05	3.21897e-05	5.6797e-05	5.66717e-05	no
HISTONE-ACETYLTRANSFERASE-RXN: (expasy) Histone acetyltransferase [2.3.1.48]	0	0	0	0	0	0	no
HISTPRATPHYD-RXN: (expasy) Phosphoribosyl-ATP diphosphatase [3.6.1.31]	0.000140469	9.21333e-05	0.000144668	0.000150128	0.000129388	0.000116764	no
HOLO-ACP-SYNTH-RXN: (expasy) Holo-[acyl-carrier-protein] synthase [2.7.8.7]	9.72217e-05	4.97474e-05	7.01007e-05	9.03218e-05	9.27079e-05	8.20222e-05	no
HOLOCYTOCHROME-C-SYNTHASE-RXN: (expasy) Holocytochrome-c synthase [4.4.1.17]	0	1.83467e-07	0	3.31954e-07	0	2.281e-07	no
HOMOACONITATE-HYDRATASE-RXN: (expasy) Homoaconitate hydratase [4.2.1.36]	1.3962e-06	1.73545e-07	2.20446e-08	2.32305e-07	8.2146e-07	2.55741e-06	no
HOMOCITRATE-SYNTHASE-RXN: (expasy) Homocitrate synthase [2.3.3.14]	7.49845e-07	1.19129e-07	0	0	9.68997e-07	5.83521e-08	no
HOMOCYSMET-RXN: (expasy) 5-methyltetrahydropteroyltriglutamate--homocysteine S-methyltransferase [2.1.1.14]	8.96061e-05	9.66093e-05	6.2645e-05	8.29139e-05	5.05445e-05	9.67831e-05	no
HOMOCYSMETB12-RXN: (expasy) Methionine synthase [2.1.1.13]	0.000198915	0.000308763	0.000167238	0.000113374	0.000249744	0.000218664	no
HOMOCYSTEINE-DESULFHYDRASE-RXN: (expasy) Homocysteine desulfhydrase [4.4.1.2]	0	0	0	0	5.90593e-06	0	no
HOMOCYSTEINE-S-METHYLTRANSFERASE-RXN: (expasy) Homocysteine S-methyltransferase [2.1.1.10]	1.25374e-06	2.7337e-05	1.3624e-05	3.33059e-05	2.58262e-05	1.38639e-05	no
HOMOSERDEAM-RXN: (expasy) Cystathionine gamma-lyase [4.4.1.1]	7.11071e-06	3.94606e-05	4.99657e-05	2.49544e-05	1.94261e-05	5.39943e-06	no
HOMOSERDEHYDROG-RXN: (expasy) Homoserine dehydrogenase [1.1.1.3]	0.000235353	0.000281362	0.00022694	0.000232025	0.000255971	0.000311997	no
HOMOSERINE-O-ACETYLTRANSFERASE-RXN: (expasy) Homoserine O-acetyltransferase [2.3.1.31]	0.0001942	0.000171444	0.00017702	0.000189445	0.000163111	0.00013397	no
HOMOSERKIN-RXN: (expasy) Homoserine kinase [2.7.1.39]	0.000132265	6.11461e-05	6.39368e-05	8.51466e-05	7.33001e-05	8.2691e-05	no
HOMSUCTRAN-RXN: (expasy) Homoserine O-succinyltransferase [2.3.1.46]	3.3091e-07	2.30116e-06	4.13832e-07	7.33239e-07	1.01854e-05	3.40587e-05	no
HYALURONATE-LYASE-RXN: (expasy) Hyaluronate lyase [4.2.2.1]	1.13425e-07	0	0	8.70532e-07	9.67261e-07	6.02555e-07	yes
HYDROG-RXN: (expasy) Ferredoxin hydrogenase [1.12.7.2]	9.70926e-05	0.000163167	9.95194e-05	8.7643e-05	0.000147895	0.000121314	no
HYDROGEN-DEHYDROGENASE-RXN: (expasy) Hydrogen dehydrogenase [1.12.1.2]	1.60694e-06	0	0	4.14106e-06	3.24831e-06	0	no
HYDROXY-MANDELATE-RACEMASE-RXN: (metacyc) hydroxymandelate racemase [5.1.2.2]	3.77917e-07	2.74298e-07	2.36917e-07	2.42246e-08	6.57303e-07	7.83802e-08	no
HYDROXYBENZOYLFORMATE-DECARBOXYLASE-RXN: (metacyc) Hydroxybenzoylformate decarboxylase [4.1.1.7]	5.93085e-08	0	1.80014e-07	0	2.3978e-06	0	no
HYDROXYHEPTA-DIENEDIOATE-HYDROXY-RXN: (expasy) 2-oxo-hept-4-ene-1,7-dioate hydratase [4.2.1.163]	0	0	0	0	6.88777e-08	1.03112e-05	no
HYDROXYLAMINE-REDUCTASE-RXN: (expasy) Hydroxylamine reductase [1.7.99.1]	0.000112369	0.000184103	0.000164358	0.000151105	0.000127163	0.000148255	no
HYDROXYMETHYLGLUTARYL-COA-LYASE-RXN: (expasy) Hydroxymethylglutaryl-CoA lyase [4.1.3.4]	1.11197e-06	0	8.45579e-07	2.4056e-07	1.23879e-06	2.10161e-06	no
HYDROXYMETHYLGLUTARYL-COA-REDUCTASE-RXN: (expasy) Hydroxymethylglutaryl-CoA reductase [1.1.1.88]	7.69449e-06	2.14274e-06	1.28841e-06	1.40822e-05	1.79012e-05	2.44439e-06	no
HYDROXYMETHYLGLUTARYL-COA-SYNTHASE-RXN: (expasy) Hydroxymethylglutaryl-CoA synthase [2.3.3.10]	4.89768e-06	3.39517e-07	5.96154e-08	2.99197e-06	5.46907e-06	2.00045e-06	no
HYDROXYPYRUVATE-REDUCTASE-RXN: (expasy) Hydroxypyruvate reductase [1.1.1.81]	6.25648e-05	1.50061e-07	2.33134e-06	7.21299e-07	3.04859e-07	1.52597e-05	no
HYPOXANPRIBOSYLTRAN-RXN: (expasy) Hypoxanthine phosphoribosyltransferase [2.4.2.8]	0.000238821	0.000229074	0.000206737	0.000231863	0.000223106	0.000193811	no
IGPSYN-RXN: (expasy) Indole-3-glycerol-phosphate synthase [4.1.1.48]	0.000118706	0.000148737	0.000127759	0.000145161	0.000125032	0.000109034	no
ILEDEAMINE-RXN: (metacyc) isoleucine dehydrogenase [1.4.1.9]	5.91002e-07	1.60531e-06	2.19549e-07	1.08072e-05	5.62501e-06	4.23906e-06	no
IMIDAZOLONEPROPIONASE-RXN: (expasy) Imidazolonepropionase [3.5.2.7]	3.55268e-05	1.82042e-05	3.11328e-05	1.41302e-05	3.36725e-05	2.79737e-05	no
IMIDPHOSDEHYD-RXN: (expasy) Imidazoleglycerol-phosphate dehydratase [4.2.1.19]	0.000160107	0.000168019	0.000174797	0.000188196	0.000172978	0.000134262	no
IMP-DEHYDROG-RXN: (expasy) IMP dehydrogenase [1.1.1.205]	0.00020461	0.000185388	0.000175075	0.000217283	0.000208994	0.000192036	no
IMPCYCLOHYDROLASE-RXN: (expasy) IMP cyclohydrolase [3.5.4.10]	0.00014425	9.22352e-05	0.000113267	8.8523e-05	0.000129271	9.00891e-05	no
INOPHOSPHOR-RXN: (expasy) Purine-nucleoside phosphorylase [2.4.2.1]	0.000176894	0.000215117	0.000222849	0.000208574	0.000201712	0.000184067	no
INORGPYROPHOSPHAT-RXN: (expasy) Inorganic diphosphatase [3.6.1.1]	0.000125756	0.000111812	0.000121313	0.000178989	8.78529e-05	0.000118832	no
INOSINEKIN-RXN: (expasy) Inosine kinase [2.7.1.73]	3.29078e-07	0	0	7.80471e-08	2.64735e-07	5.17871e-05	no
IPPISOM-RXN: (expasy) Isopentenyl-diphosphate Delta-isomerase [5.3.3.2]	4.3734e-05	8.48684e-05	5.11624e-05	4.95897e-05	5.24113e-05	6.07481e-05	no
ISOCHORMAT-RXN: (expasy) Isochorismatase [3.3.2.1]	1.58798e-06	7.64344e-07	0	2.01821e-06	7.36072e-07	4.0594e-05	no
ISOCHORSYN-RXN: (expasy) Isochorismate synthase [5.4.4.2]	2.17682e-05	1.1799e-05	1.53597e-05	3.92723e-06	6.97311e-06	6.25784e-05	no
ISOCIT-CLEAV-RXN: (expasy) Isocitrate lyase [4.1.3.1]	1.78864e-07	0	0	1.11133e-07	1.06773e-07	4.25065e-05	no
ISOCITDEH-RXN: (expasy) Isocitrate dehydrogenase (NADP(+)) [1.1.1.42]	0.000151306	0.000130507	0.000153243	0.000170412	0.000138409	0.000173575	no
ISOCITRATE-DEHYDROGENASE-NAD+-RXN: (expasy) AMBIGUOUS [1.1.1.286; 1.1.1.41]	8.70539e-06	2.53081e-07	7.03078e-07	0	1.44997e-06	4.01926e-07	no
ISOLEUCINE--TRNA-LIGASE-RXN: (expasy) Isoleucine--tRNA ligase [6.1.1.5]	0.000208527	0.000212451	0.000199669	0.000223556	0.000221531	0.000237253	no
ISOPROPANOL-DEHYDROGENASE-NADP+-RXN: (expasy) Isopropanol dehydrogenase (NADP(+)) [1.1.1.80]	0	0	0	1.81228e-07	0	0	no
ISPH2-RXN: (expasy) 4-hydroxy-3-methylbut-2-enyl diphosphate reductase [1.17.7.4]	0.000150732	0.000167368	0.000160353	0.000166678	0.00015481	0.000149274	no
KANAMYCIN-KINASE-RXN: (expasy) Kanamycin kinase [2.7.1.95]	3.87252e-06	0	9.12566e-07	7.88218e-06	1.46969e-06	5.82579e-07	no
KDGALDOL-RXN: (expasy) 2-dehydro-3-deoxyglucarate aldolase [4.1.2.20]	2.21142e-06	4.89821e-06	6.18066e-08	7.61757e-08	2.05721e-06	4.74433e-05	no
KDO-8PPHOSPHAT-RXN: (expasy) 3-deoxy-manno-octulosonate-8-phosphatase [3.1.3.45]	1.62216e-05	9.8102e-06	9.27557e-06	4.7795e-06	4.58218e-06	3.78579e-05	no
KDO-8PSYNTH-RXN: (expasy) 3-deoxy-8-phosphooctulonate synthase [2.5.1.55]	3.09046e-05	2.06463e-05	2.46911e-05	1.72161e-05	4.63663e-05	2.3488e-05	no
KDOTRANS-RXN: (expasy) Lipid IV(A) 3-deoxy-D-manno-octulosonic acid transferase [2.4.99.12]	9.7267e-06	8.89908e-06	7.13298e-06	1.64211e-06	3.2689e-06	8.86971e-06	no
KDOTRANS2-RXN: (expasy) (Kdo)-lipid IV(A) 3-deoxy-D-manno-octulosonic acid transferase [2.4.99.13]	2.23717e-08	0	0	0	0	6.60514e-06	no
KDPGALDOL-RXN: (expasy) AMBIGUOUS [4.1.2.14; 4.1.2.55]	1.00892e-05	1.39337e-05	4.08675e-05	1.89524e-05	1.95179e-05	2.79184e-05	no
KDUD-RXN: (expasy) 2-deoxy-D-gluconate 3-dehydrogenase [1.1.1.125]	1.78712e-06	2.93771e-07	3.91261e-07	5.11841e-07	1.82126e-06	5.38254e-06	no
KETOACYLCOATHIOL-RXN: (expasy) Acetyl-CoA C-acyltransferase [2.3.1.16]	1.94714e-06	2.56017e-06	1.93464e-06	5.11036e-06	5.08523e-06	9.73283e-05	no
KETOGLUTREDUCT-RXN: (expasy) 2-oxoglutarate reductase [1.1.1.399]	0	3.67237e-07	0	0	1.96879e-07	4.10821e-06	no
KETOISOCAPROATE-RXN: (metacyc) 4-methyl-2-oxopentanoate dehydrogenase (lipoamide) [1.2.4.4]	1.27632e-06	1.72534e-06	1.0682e-06	1.42566e-06	1.38972e-05	1.08158e-06	no
KETOLACTOSE-RXN: (expasy) Beta-galactosidase [3.2.1.23]	0.00089879	0.000857844	0.000752323	0.000542551	0.000754908	0.000546653	no
KETOTETROSE-PHOSPHATE-ALDOLASE-RXN: (expasy) Ketotetrose-phosphate aldolase [4.1.2.2]	2.82336e-07	5.34207e-08	1.02127e-07	3.47551e-07	0	1.02807e-07	no
KYNURENINASE-RXN: (expasy) Kynureninase [3.7.1.3]	4.44319e-07	0	0	0	1.20116e-06	0	no
L-ARABINONOLACTONASE-RXN: (expasy) L-arabinonolactonase [3.1.1.15]	1.84385e-06	0	0	0	0	0	no
L-ARABINOSE-1-DEHYDROGENASE-RXN: (expasy) L-arabinose 1-dehydrogenase [1.1.1.46]	0	0	0	0	0	0	no
L-ASPARTATE-OXID-RXN: (expasy) L-aspartate oxidase [1.4.3.16]	0.000117984	0.00012615	0.000103961	0.00010939	0.000136364	0.000118863	no
L-FUCONATE-HYDRATASE-RXN: (expasy) L-fuconate dehydratase [4.2.1.68]	2.54393e-07	1.04354e-06	4.7738e-07	0	3.9827e-07	1.09109e-07	no
L-GLN-FRUCT-6-P-AMINOTRANS-RXN: (expasy) Glutamine--fructose-6-phosphate transaminase (isomerizing) [2.6.1.16]	0.000226131	0.000221094	0.000181878	0.000243415	0.000231368	0.00016356	no
L-IDITOL-2-DEHYDROGENASE-RXN: (expasy) L-iditol 2-dehydrogenase [1.1.1.14]	0.000128328	0.00023338	0.000153869	0.000127579	0.00013007	0.000135199	no
L-IDONATE-2-DEHYDROGENASE-RXN: (metacyc) L-idonate 2-dehydrogenase [1.1.1.264]	1.17247e-07	0	2.15082e-07	1.42959e-07	4.66755e-08	1.31491e-06	no
L-LACTATE-DEHYDROGENASE-CYTOCHROME-RXN: (expasy) L-lactate dehydrogenase (cytochrome) [1.1.2.3]	1.36847e-06	1.12635e-05	1.03367e-05	5.89906e-06	1.32198e-06	5.12602e-05	no
L-LACTATE-DEHYDROGENASE-RXN: (expasy) L-lactate dehydrogenase [1.1.1.27]	0.000222238	0.000187864	0.000162818	0.000203321	0.00018501	0.000168895	no
L-LYSINE-AMINOTRANSFERASE-RXN: (expasy) L-lysine 6-transaminase [2.6.1.36]	0	0	0	0	2.49998e-06	0	no
L-RHAMNONATE-DEHYDRATASE-RXN: (expasy) L-rhamnonate dehydratase [4.2.1.90]	9.29999e-06	2.76144e-06	1.36894e-06	2.22331e-06	5.64704e-07	2.18762e-06	no
LACCOA-RXN: (expasy) Propionate CoA-transferase [2.8.3.1]	6.09117e-06	2.69186e-05	1.7342e-05	9.72276e-06	5.73798e-07	2.6094e-06	no
LACTALDDEHYDROG-RXN: (expasy) Lactaldehyde dehydrogenase [1.2.1.22]	8.12519e-06	6.48799e-06	8.21157e-06	2.32458e-06	3.09077e-06	5.111e-05	no
LACTALDREDUCT-RXN: (expasy) Lactaldehyde reductase [1.1.1.77]	9.5868e-05	7.0201e-05	9.90465e-05	7.90196e-05	3.47166e-05	8.50687e-05	no
LACTATE-RACEMASE-RXN: (expasy) Lactate racemase [5.1.2.1]	0	0	0	0	4.3146e-07	0	no
LACTOSE-6-PHOSPHATE-ISOMERASE-RXN: (expasy) Galactose-6-phosphate isomerase [5.3.1.26]	4.64159e-06	1.43901e-05	8.15507e-06	4.57825e-05	3.14852e-05	3.38664e-05	no
LACTOSE6P-HYDROXY-RXN: (metacyc) 6-phospho-lactosidase [3.2.1.85]	1.41748e-05	3.2287e-05	1.2253e-05	8.4622e-05	1.7781e-05	5.05538e-05	no
LACTOYL-COA-DEHYDRATASE-RXN: (metacyc) D-Lactoyl-CoA dehydratase [4.2.1.54]	0	4.47925e-07	3.73136e-07	1.06571e-07	0	0	no
LAUROYLACYLTRAN-RXN: (expasy) Kdo(2)-lipid IV(A) lauroyltransferase [2.3.1.241]	0	2.10632e-07	0	0	1.1553e-07	1.1411e-05	no
LCARNCOALIG-RXN: (expasy) Carnitine--CoA ligase [6.2.1.48]	0	0	0	0	0	2.5516e-06	no
LCYSDESULF-RXN: (expasy) AMBIGUOUS [4.4.1.1; 4.4.1.28]	1.33263e-07	0	0	0	0	1.22247e-05	no
LEUCINE--TRNA-LIGASE-RXN: (expasy) Leucine--tRNA ligase [6.1.1.4]	0.000179537	0.000187429	0.000182363	0.00019588	0.000191585	0.000201891	no
LEUCINE-DEHYDROGENASE-RXN: (expasy) Leucine dehydrogenase [1.4.1.9]	5.91002e-07	1.60531e-06	2.19549e-07	1.08072e-05	5.62501e-06	4.23906e-06	no
LEUCYLTRANSFERASE-RXN: (expasy) Lysine/arginine leucyltransferase [2.3.2.6]	1.13571e-05	1.17399e-05	1.19366e-05	8.90922e-06	2.48777e-05	4.01693e-05	no
LEVANSUCRASE-RXN: (expasy) Levansucrase [2.4.1.10]	9.17952e-07	6.92633e-07	1.29739e-07	8.77631e-06	3.30149e-06	2.39701e-07	no
LINB1-RXN: (expasy) Haloalkane dehalogenase [3.8.1.5]	2.29891e-07	0	0	8.35648e-07	4.75323e-06	8.99247e-08	no
LINB2-RXN: (expasy) Haloalkane dehalogenase [3.8.1.5]	2.29891e-07	0	0	8.35648e-07	4.75323e-06	8.99247e-08	no
LINOLEATE-ISOMERASE-RXN: (expasy) Linoleate isomerase [5.2.1.5]	7.13329e-08	0	0	5.26034e-06	2.96509e-06	1.77929e-07	no
LINOLENOYL-RXN: (expasy) Long-chain-fatty-acid--CoA ligase [6.2.1.3]	6.58913e-05	8.65922e-05	8.27009e-05	6.42304e-05	7.20211e-05	7.65966e-05	no
LIPIDADISACCHARIDESYNTH-RXN: (expasy) Lipid-A-disaccharide synthase [2.4.1.182]	3.21574e-05	2.09223e-05	2.74514e-05	1.55193e-05	4.66832e-05	6.02432e-05	no
LIPIDXSYNTHESIS-RXN: (expasy) UDP-2,3-diacylglucosamine diphosphatase [3.6.1.54]	1.30532e-06	1.86997e-06	6.76255e-06	3.07959e-06	1.91664e-06	4.46301e-05	no
LONG-CHAIN-ACYL-COA-DEHYDROGENASE-RXN: (expasy) Long-chain-acyl-CoA dehydrogenase [1.3.8.8]	7.23957e-08	0	0	0	1.72847e-07	3.35913e-06	no
LONG-CHAIN-FATTY-ACYL-COA-REDUCTASE-RXN: (expasy) Long-chain-fatty-acyl-CoA reductase [1.2.1.50]	8.56105e-05	1.37476e-06	2.43283e-06	0	0	8.15493e-07	no
LTAA-RXN: (expasy) AMBIGUOUS [4.1.2.48; 4.1.2.49]	2.83085e-07	0	2.35282e-07	0	1.72065e-07	0	no
LTARTDEHYDRA-RXN: (expasy) L(+)-tartrate dehydratase [4.2.1.32]	7.7804e-05	0.000194519	0.000188482	9.21012e-05	0.000112132	0.000185041	no
LUMAZINESYN-RXN: (expasy) 6,7-dimethyl-8-ribityllumazine synthase [2.5.1.78]	8.13149e-05	0.000117705	0.00015312	0.000110829	0.000141787	0.000108892	no
LXULRU5P-RXN: (expasy) L-ribulose-5-phosphate 3-epimerase [5.1.3.22]	3.28764e-05	4.52779e-05	1.99748e-05	1.09611e-05	3.13096e-05	6.27478e-05	no
LYSDECARBOX-RXN: (expasy) Lysine decarboxylase [4.1.1.18]	9.7061e-07	3.50653e-06	1.60984e-06	3.5304e-06	6.06732e-07	9.56087e-05	no
LYSINE--TRNA-LIGASE-RXN: (expasy) Lysine--tRNA ligase [6.1.1.6]	0.000243936	0.000204458	0.000207784	0.000258326	0.000231955	0.000317288	no
LYSINE-23-AMINOMUTASE-RXN: (expasy) Lysine 2,3-aminomutase [5.4.3.2]	1.4243e-05	1.59214e-05	1.43197e-05	4.69691e-06	8.44596e-06	2.0293e-05	no
LYSOPHOSPHOLIPASE-RXN: (expasy) Lysophospholipase [3.1.1.5]	8.13572e-05	1.93857e-06	1.26033e-05	7.6901e-06	6.82059e-06	7.03191e-05	no
LYSYLTRANSFERASE-RXN: (expasy) Lysyltransferase [2.3.2.3]	0.000123716	0.000157531	0.0001265	0.000118834	0.000159187	9.30467e-05	no
LYXK-RXN: (expasy) L-xylulokinase [2.7.1.53]	4.15502e-06	1.02531e-06	4.8569e-08	1.29458e-06	4.45586e-06	2.94946e-05	no
MACROCIN-O-METHYLTRANSFERASE-RXN: (expasy) Macrocin O-methyltransferase [2.1.1.101]	0	9.5728e-08	0	0	0	0	no
MALATE-DEH-RXN: (expasy) Malate dehydrogenase [1.1.1.37]	3.00285e-05	2.15374e-05	4.22109e-05	1.71802e-05	5.01427e-05	4.24547e-05	no
MALATE-DEHYDROGENASE-ACCEPTOR-RXN: (expasy) Malate dehydrogenase (quinone) [1.1.5.4]	2.11774e-07	0	0	5.24348e-08	4.02181e-07	4.8437e-05	no
MALIC-NADP-RXN: (expasy) Malate dehydrogenase (oxaloacetate-decarboxylating) (NADP(+)) [1.1.1.40]	6.08203e-05	8.0493e-05	7.6877e-05	6.36725e-05	8.04107e-05	8.57968e-05	no
MALONYL-COA-ACP-TRANSACYL-RXN: (expasy) [Acyl-carrier-protein] S-malonyltransferase [2.3.1.39]	0.000158599	0.000201611	0.000192976	0.0001835	0.000172959	0.000170496	no
MALSYN-RXN: (expasy) Malate synthase [2.3.3.9]	2.9244e-07	0	0	8.64004e-08	2.65108e-07	8.66421e-05	no
MALTACETYLTRAN-RXN: (expasy) Maltose O-acetyltransferase [2.3.1.79]	0.000172592	4.85366e-05	4.7628e-05	2.81711e-05	3.12559e-05	4.86479e-05	no
MALTODEXGLUCOSID-RXN: (expasy) Alpha-glucosidase [3.2.1.20]	9.06417e-05	2.93555e-06	5.45312e-06	5.65337e-06	2.02078e-05	7.43248e-06	no
MALTOSE-6-PHOSPHATE-GLUCOSIDASE-RXN: (expasy) Maltose-6'-phosphate glucosidase [3.2.1.122]	2.71691e-05	3.3262e-05	1.87522e-05	1.38192e-05	4.09124e-06	3.25688e-05	no
MALTOSE-PHOSPHORYLASE-RXN: (expasy) Maltose phosphorylase [2.4.1.8]	6.7176e-07	1.44262e-06	4.61359e-06	1.47545e-07	1.31971e-05	1.65084e-06	no
MANDELATE-DEHYDROGENASE-RXN: (expasy) (S)-mandelate dehydrogenase [1.1.99.31]	1.51733e-06	0	5.94759e-08	0	6.53946e-07	0	no
MANDELATE-RACEMASE-RXN: (expasy) Mandelate racemase [5.1.2.2]	3.77917e-07	2.74298e-07	2.36917e-07	2.42246e-08	6.57303e-07	7.83802e-08	no
MANNITOL-1-PHOSPHATASE-RXN: (expasy) Mannitol-1-phosphatase [3.1.3.22]	2.65125e-08	0	0	2.2547e-08	0	2.19272e-05	no
MANNITOL-2-DEHYDROGENASE-RXN: (expasy) Mannitol 2-dehydrogenase [1.1.1.67]	8.54918e-06	8.58565e-07	5.12968e-07	7.25578e-07	4.78248e-07	4.96354e-05	no
MANNKIN-RXN: (expasy) Mannokinase [2.7.1.7]	0	1.11697e-06	0	0	0	1.77267e-06	no
MANNONDEHYDRAT-RXN: (expasy) Mannonate dehydratase [4.2.1.8]	8.25195e-05	9.52571e-05	8.7505e-05	7.55864e-05	8.06494e-05	0.000105693	no
MANNONOXIDOREDUCT-RXN: (expasy) Fructuronate reductase [1.1.1.57]	1.4411e-05	2.51412e-06	2.74038e-05	1.12767e-05	4.05882e-06	5.9111e-05	no
MANNOSE-ISOMERASE-RXN: (expasy) Mannose isomerase [5.3.1.7]	0	0	0	0	1.84973e-07	0	no
MANNPDEHYDROG-RXN: (expasy) Mannitol-1-phosphate 5-dehydrogenase [1.1.1.17]	1.57939e-05	4.61861e-05	3.85437e-05	1.24569e-05	3.06784e-05	4.79712e-05	no
MANNPGUANYLTRANGDP-RXN: (expasy) Mannose-1-phosphate guanylyltransferase (GDP) [2.7.7.22]	9.62356e-06	8.28647e-06	1.21048e-05	2.67005e-06	3.91811e-06	3.17986e-05	no
MANNPISOM-RXN: (expasy) Mannose-6-phosphate isomerase [5.3.1.8]	3.68382e-05	3.48085e-05	4.13397e-05	3.61167e-05	3.61422e-05	4.62238e-05	no
MANNURONATE-REDUCTASE-RXN: (expasy) Mannuronate reductase [1.1.1.131]	2.40511e-05	1.18077e-05	5.07978e-05	1.41878e-05	9.99688e-06	1.22498e-05	no
MCHMBARK-RXN: (expasy) Methenyltetrahydromethanopterin cyclohydrolase [3.5.4.27]	0	0	0	6.63404e-06	5.89017e-06	0	no
MCPMETEST-RXN: (expasy) Protein-glutamate methylesterase [3.1.1.61]	6.78995e-05	6.02112e-06	3.86491e-05	5.88457e-05	7.53644e-06	6.95459e-05	no
MERCAPYSTRANS-RXN: (expasy) 3-mercaptopyruvate sulfurtransferase [2.8.1.2]	1.74094e-07	0	0	0	0	3.92447e-05	no
MERCURY-II-REDUCTASE-RXN: (expasy) Mercury(II) reductase [1.16.1.1]	7.26792e-06	7.13014e-06	1.03882e-05	2.60903e-05	6.32337e-05	2.94166e-05	no
METHANOL-DEHYDROGENASE-RXN: (expasy) Methanol dehydrogenase [1.1.1.244]	3.21093e-06	1.79646e-05	6.71428e-06	3.52399e-06	8.90205e-06	2.56537e-06	no
METHCOCLTH-RXN: (expasy) Co-methyltransferase [2.1.1.258]	0	0	0	0	0	4.77547e-07	no
METHELENE-THMPT-OXI-RXN: (expasy) 5,10-methylenetetrahydromethanopterin reductase [1.5.98.2]	1.95565e-07	0	0	8.38175e-06	6.16694e-06	7.90007e-08	no
METHENYLTHFCYCLOHYDRO-RXN: (expasy) Methenyltetrahydrofolate cyclohydrolase [3.5.4.9]	0.000192009	0.000194243	0.000166807	0.000198467	0.000188464	0.000165218	no
METHGLYSYN-RXN: (expasy) Methylglyoxal synthase [4.2.3.3]	0.000158915	0.000234847	0.000222318	0.000166315	0.000186607	0.00020938	no
METHIONINE--TRNA-LIGASE-RXN: (expasy) Methionine--tRNA ligase [6.1.1.10]	0.000288366	0.000329191	0.000262035	0.000283749	0.000248389	0.000241009	no
METHIONINE-GAMMA-LYASE-RXN: (expasy) Methionine gamma-lyase [4.4.1.11]	4.86433e-05	0.000114215	0.000125841	0.00012168	7.4103e-05	0.000101215	no
METHIONYL-TRNA-FORMYLTRANSFERASE-RXN: (expasy) Methionyl-tRNA formyltransferase [2.1.2.9]	0.000189843	0.000180669	0.000177324	0.00018982	0.000186118	0.00018006	no
METHYL-COM-HTP-RXN: (expasy) Coenzyme-B sulfoethylthiotransferase [2.8.4.1]	2.22926e-07	0	0	2.79673e-05	1.92754e-05	9.6913e-08	no
METHYLACETOACETYLCOATHIOL-RXN: (expasy) Acetyl-CoA C-acyltransferase [2.3.1.16]	1.94714e-06	2.56017e-06	1.93464e-06	5.11036e-06	5.08523e-06	9.73283e-05	no
METHYLACYLYLCOA-HYDROXY-RXN: (metacyc) Methylacrylyl-CoA hydratase [4.2.1.17]	2.02549e-05	3.09348e-05	2.50205e-05	2.53466e-05	1.79249e-05	6.11011e-05	no
METHYLASPARTATE-AMMONIA-LYASE-RXN: (expasy) Methylaspartate ammonia-lyase [4.3.1.2]	1.07686e-07	0	0	1.28552e-07	0	3.35284e-07	no
METHYLASPARTATE-MUTASE-RXN: (expasy) Methylaspartate mutase [5.4.99.1]	9.05e-06	1.40394e-07	8.25913e-08	3.34537e-06	5.77094e-06	2.30832e-05	no
METHYLENETHFDEHYDROG-NADP-RXN: (expasy) Methylenetetrahydrofolate dehydrogenase (NADP(+)) [1.5.1.5]	0.000181672	0.000173203	0.000146115	0.000178462	0.000173628	0.000141605	no
METHYLISOCITRATE-LYASE-RXN: (expasy) Methylisocitrate lyase [4.1.3.30]	5.00801e-07	1.29231e-07	0	9.36171e-08	3.02937e-07	2.74471e-05	no
METHYLITACONATE-DELTA-ISOMERASE-RXN: (expasy) Methylitaconate Delta-isomerase [5.3.3.6]	2.2319e-07	0	1.34928e-07	0	2.87205e-07	1.44266e-05	no
METHYLMALONYL-COA-DECARBOXYLASE-RXN: (expasy) Ethylmalonyl-CoA decarboxylase [4.1.1.94]	0	1.78932e-07	0	5.6841e-08	9.55818e-08	4.29804e-07	no
METHYLMALONYL-COA-EPIM-RXN: (expasy) Methylmalonyl-CoA epimerase [5.1.99.1]	1.52581e-06	3.55775e-06	4.36529e-06	3.04556e-06	6.4583e-06	1.2441e-06	no
METHYLMALONYL-COA-MUT-RXN: (expasy) Methylmalonyl-CoA mutase [5.4.99.2]	4.12451e-06	7.05783e-06	4.48486e-06	8.60413e-06	3.49696e-05	3.23308e-05	no
METHYLTHIOADENOSINE-NUCLEOSIDASE-RXN: (expasy) AMBIGUOUS [3.2.2.16; 3.2.2.9]	0	0	0	0	1.05922e-07	0	no
METHYLVALERATE-RXN: (metacyc) 3-methyl-2-oxobutanoate dehydrogenase [(S)-2-methylbutanoyl-transferring) [1.2.4.4]	1.27632e-06	1.72534e-06	1.0682e-06	1.42566e-06	1.38972e-05	1.08158e-06	no
MEVALONATE-KINASE-RXN: (expasy) Mevalonate kinase [2.7.1.36]	5.38027e-06	1.30648e-06	3.09492e-07	2.13726e-05	2.27329e-05	2.47176e-06	no
MHPCHYDROL-RXN: (expasy) 2-hydroxy-6-oxonona-2,4-dienedioate hydrolase [3.7.1.14]	1.83594e-07	0	9.84869e-08	9.05109e-08	7.49537e-08	3.99587e-05	no
MHPELY-RXN: (expasy) 4-hydroxy-2-oxovalerate aldolase [4.1.3.39]	1.78196e-05	3.13372e-06	2.61144e-05	3.83367e-05	3.22703e-06	6.00183e-05	no
MHPHYDROXY-RXN: (expasy) 3-(3-hydroxy-phenyl)propanoic acid hydroxylase [1.14.13.127]	1.76918e-07	0	0	6.80358e-08	0	3.88129e-05	no
MMUM-RXN: (expasy) Homocysteine S-methyltransferase [2.1.1.10]	1.25374e-06	2.7337e-05	1.3624e-05	3.33059e-05	2.58262e-05	1.38639e-05	no
MORPHINE-6-DEHYDROGENASE-RXN: (expasy) Morphine 6-dehydrogenase [1.1.1.218]	8.14882e-06	1.49572e-06	2.27556e-07	1.01286e-05	5.11717e-06	1.87623e-06	no
MRNA-GUANINE-N7--METHYLTRANSFERASE-RXN: (expasy) mRNA (guanine-N(7)-)-methyltransferase [2.1.1.56]	0	0	0	0	5.65393e-06	0	no
MRNA-GUANYLYLTRANSFERASE-RXN: (expasy) mRNA guanylyltransferase [2.7.7.50]	0	0	0	0	5.65393e-06	0	no
MTDMBARK-RXN: (expasy) Methylenetetrahydromethanopterin dehydrogenase [1.5.98.1]	1.46123e-07	0	0	9.73949e-06	6.5465e-06	0	no
MUCONATE-CYCLOISOMERASE-RXN: (expasy) Muconate cycloisomerase [5.5.1.1]	0	0	2.80705e-05	4.3651e-06	0	2.51005e-06	no
MUCONOLACTONE-DELTA-ISOMERASE-RXN: (expasy) Muconolactone Delta-isomerase [5.3.3.4]	0	0	0	5.63674e-08	0	0	no
MYCOCEROSATE-SYNTHASE-RXN: (expasy) Mycocerosate synthase [2.3.1.111]	0	0	0	0	0	0	no
MYO-INOSITOL-1-PHOSPHATE-SYNTHASE-RXN: (expasy) Inositol-3-phosphate synthase [5.5.1.4]	1.73796e-05	9.33548e-06	1.00759e-05	1.45713e-05	1.0164e-05	2.90017e-06	no
MYO-INOSITOL-1OR-4-MONOPHOSPHATASE-RXN: (expasy) Inositol-phosphate phosphatase [3.1.3.25]	3.49915e-05	5.52568e-05	3.95105e-05	4.25359e-05	8.83032e-05	5.24467e-05	no
MYO-INOSITOL-2-DEHYDROGENASE-RXN: (expasy) Inositol 2-dehydrogenase [1.1.1.18]	6.1424e-05	0.000124691	7.54569e-05	2.82406e-05	4.15586e-05	1.35525e-05	no
MYO-INOSOSE-2-DEHYDRATASE-RXN: (expasy) Myo-inosose-2 dehydratase [4.2.1.44]	3.09295e-05	5.67766e-05	3.40542e-05	1.96019e-05	5.10215e-05	9.33156e-06	no
MYRISTOYLACYLTRAN-RXN: (expasy) Lauroyl-Kdo(2)-lipid IV(A) myristoyltransferase [2.3.1.243]	1.66785e-08	2.32282e-07	0	0	0	9.22262e-06	no
MYRPALMTRAN-RXN: (expasy) Lauroyl-Kdo(2)-lipid IV(A) myristoyltransferase [2.3.1.243]	1.66785e-08	2.32282e-07	0	0	0	9.22262e-06	no
N-ACETYLDIAMINOPIMELATE-DEACETYLASE-RXN: (expasy) N-acetyldiaminopimelate deacetylase [3.5.1.47]	3.56616e-06	1.90209e-06	8.03946e-07	1.25339e-05	1.82481e-05	4.16054e-06	no
N-ACETYLGLUCOSAMINE-KINASE-RXN: (expasy) N-acetylglucosamine kinase [2.7.1.59]	3.30954e-06	2.14974e-06	9.35818e-06	2.87332e-06	2.03175e-06	3.38091e-05	no
N-ACETYLGLUTPREDUCT-RXN: (expasy) N-acetyl-gamma-glutamyl-phosphate reductase [1.2.1.38]	0.000195506	0.000196379	0.00019384	0.00018974	0.000180955	0.000179024	no
N-ACETYLNEURAMINATE-SYNTHASE-RXN: (expasy) N-acetylneuraminate synthase [2.5.1.56]	8.31251e-06	6.00856e-06	5.6396e-07	1.23891e-07	2.57443e-06	3.44578e-07	no
N-ACETYLTRANSFER-RXN: (expasy) Amino-acid N-acetyltransferase [2.3.1.1]	0.000139729	0.000184021	0.000169293	0.000198172	0.000164865	0.000172932	no
N-ACYLGLUCOSAMINE-2-EPIMERASE-RXN: (expasy) N-acylglucosamine 2-epimerase [5.1.3.8]	2.38243e-06	3.95196e-06	1.36704e-06	5.2507e-06	2.13862e-05	2.09284e-06	no
N-ACYLMANNOSAMINE-KINASE-RXN: (expasy) N-acylmannosamine kinase [2.7.1.60]	6.02323e-06	2.48986e-05	9.38157e-06	1.34077e-05	2.15493e-06	5.34467e-05	no
N-CARBAMOYLPUTRESCINE-AMIDASE-RXN: (expasy) N-carbamoylputrescine amidase [3.5.1.53]	3.19664e-06	5.75716e-06	2.24826e-05	3.2671e-05	4.64459e-07	1.682e-05	no
N-CARBAMOYLSARCOSINE-AMIDASE-RXN: (expasy) N-carbamoylsarcosine amidase [3.5.1.59]	1.30098e-06	9.31628e-07	0	4.55223e-07	2.61211e-06	2.86487e-07	no
N-METHYL-L-AMINO-ACID-OXIDASE-RXN: (expasy) N-methyl-L-amino-acid oxidase [1.5.3.2]	0	0	0	0	0	0	no
N6-HYDROXYLYSINE-O-ACETYLTRANSFERASE-RXN: (expasy) N(6)-hydroxylysine O-acetyltransferase [2.3.1.102]	2.99222e-07	0	0	0	0	6.92018e-08	no
NACGLCTRANS-RXN: (metacyc) UDP-N-acetyl-D-glucosamine:N-acetylmuramoyl-L-alanyl-D-glutamyl-meso-2,6-diaminopimelyl-D-alanyl-D-alanine-diphosphoundecaprenol 4-&beta;-N-acetylglucosaminlytransferase [2.4.1.227]	0.000204349	0.000219618	0.000222565	0.000223996	0.000204823	0.000207072	no
NAD-KIN-RXN: (expasy) NAD(+) kinase [2.7.1.23]	0.000183673	0.000154962	0.000158873	0.000186826	0.000186911	0.000155813	no
NAD-SYNTH-GLN-RXN: (expasy) NAD(+) synthase (glutamine-hydrolyzing) [6.3.5.1]	0.000185299	0.000169637	0.000172206	0.000213337	0.000176538	0.000117121	no
NAD-SYNTH-NH3-RXN: (expasy) NAD(+) synthase [6.3.1.5]	1.44759e-05	3.41298e-06	5.90918e-06	4.55626e-05	4.67014e-05	4.79051e-05	no
NADH-DEHYDROG-A-RXN: (expasy) NADH:ubiquinone reductase (H(+)-translocating) [7.1.1.2]	1.47656e-08	0	0	2.27937e-08	2.77564e-07	5.0509e-06	no
NADH-DEHYDROGENASE-QUINONE-RXN: (metacyc) NADH dehydrogenase (quinone) [1.6.5.9]	0	0	0	0	5.25237e-06	0	no
NADH-PEROXIDASE-RXN: (expasy) NADH peroxidase [1.11.1.1]	0.00017886	0.000163001	0.000133643	0.000147671	0.000138795	0.000144868	no
NADH-PQ-DEHYDROG-RXN: (expasy) NADH:ubiquinone reductase (H(+)-translocating) [7.1.1.2]	0	0	0	0	1.36627e-07	0	no
NADPH-DEHYDROGENASE-FLAVIN-RXN: (expasy) Flavin reductase (NADPH) [1.5.1.30]	1.28389e-07	0	0	2.75983e-06	2.83458e-06	2.98504e-06	yes
NADPH-DEHYDROGENASE-RXN: (expasy) NADPH dehydrogenase [1.6.99.1]	2.12705e-05	1.17172e-05	1.08409e-05	1.94952e-06	2.82689e-06	1.6887e-06	yes
NADPYROPHOSPHAT-RXN: (expasy) NAD(+) diphosphatase [3.6.1.22]	7.35289e-05	0.000107531	8.56346e-05	7.24608e-05	5.79158e-05	8.2005e-05	no
NAG1P-URIDYLTRANS-RXN: (expasy) UDP-N-acetylglucosamine diphosphorylase [2.7.7.23]	8.57001e-05	2.2142e-05	2.20561e-05	5.70844e-05	5.55718e-05	8.56027e-05	no
NAG6PDEACET-RXN: (expasy) N-acetylglucosamine-6-phosphate deacetylase [3.5.1.25]	0.000123724	0.000140808	0.00015554	7.7e-05	8.38645e-05	0.000162506	no
NANE-RXN: (metacyc) N-acetyl-D-mannosamine-6-phosphate epimerase [5.1.3.9]	0.000127168	8.5623e-05	5.66805e-05	2.28053e-05	7.13646e-05	0.000120578	no
NANK-RXN: (expasy) N-acylmannosamine kinase [2.7.1.60]	6.02323e-06	2.48986e-05	9.38157e-06	1.34077e-05	2.15493e-06	5.34467e-05	no
NAPHTHOATE-SYN-RXN: (expasy) 1,4-dihydroxy-2-naphthoyl-CoA synthase [4.1.3.36]	2.53244e-05	1.35493e-05	2.14882e-05	1.0328e-05	4.38765e-05	3.05717e-05	no
NICONUCADENYLYLTRAN-RXN: (expasy) Nicotinate-nucleotide adenylyltransferase [2.7.7.18]	0.00016884	0.00012362	0.000100313	9.64099e-05	0.000152363	0.000121795	no
NICOTINAMID-RXN: (expasy) Nicotinamidase [3.5.1.19]	9.28542e-07	1.37157e-06	4.48395e-07	1.32485e-05	1.57897e-05	2.1472e-05	yes
NICOTINATEPRIBOSYLTRANS-RXN: (expasy) Nicotinate phosphoribosyltransferase [6.3.4.21]	0.000203137	0.000193645	0.000161969	0.00019156	0.000181676	0.000166508	no
NITRATE-REDUCTASE-CYTOCHROME-RXN: (expasy) Nitrate reductase (cytochrome) [1.9.6.1]	3.71832e-06	1.45523e-06	2.81715e-06	1.01319e-06	3.38472e-06	5.91131e-06	no
NITRIC-OXIDE-REDUCTASE-RXN: (expasy) Nitric-oxide reductase (cytochrome c) [1.7.2.5]	0	3.40094e-07	0	1.39483e-07	7.99019e-06	2.01484e-07	no
NITRIC-OXIDE-SYNTHASE-RXN: (expasy) Nitric-oxide synthase (NADPH) [1.14.13.39]	0	3.72479e-07	0	3.87242e-07	2.08604e-07	0	no
NITRITE-REDUCTASE-CYTOCHROME-RXN: (expasy) Nitrite reductase (NO-forming) [1.7.2.1]	0	3.01467e-07	0	1.37288e-07	0	1.31582e-07	no
NITROGENASE-RXN: (expasy) Nitrogenase [1.18.6.1]	7.50065e-05	8.34388e-05	7.72313e-05	9.74915e-05	5.42216e-05	4.77454e-05	no
NMNAMIDOHYDRO-RXN: (expasy) Nicotinamide-nucleotide amidase [3.5.1.42]	4.79318e-07	1.18977e-06	0	8.89719e-08	2.36215e-07	7.39109e-06	no
NQOR-RXN: (expasy) NAD(P)H dehydrogenase (quinone) [1.6.5.2]	8.1099e-05	4.20398e-06	1.88155e-06	5.00043e-06	1.00589e-05	7.47096e-05	no
NUCLEOSIDE-DEOXYRIBOSYLTRANSFERASE-RXN: (expasy) Nucleoside deoxyribosyltransferase [2.4.2.6]	5.28409e-06	0	0	1.28154e-06	1.3999e-05	0	no
NUCLEOSIDE-DIP-KIN-RXN: (expasy) Nucleoside-diphosphate kinase [2.7.4.6]	3.65735e-05	2.5354e-05	1.97914e-05	4.64356e-05	4.05027e-05	4.04082e-05	no
NUCLEOSIDE-TRIPHOSPHATASE-RXN: (expasy) Nucleoside-triphosphate phosphatase [3.6.1.15]	1.0289e-05	3.26588e-07	1.31766e-06	7.48209e-07	1.33599e-05	1.82019e-06	no
NUCLEOTIDASE-RXN: (expasy) Nucleotidase [3.1.3.31]	9.08858e-08	0	0	9.11882e-08	0	0	no
NUCLEOTIDE-PYROPHOSPHATASE-RXN: (expasy) Nucleotide diphosphatase [3.6.1.9]	3.30139e-08	0	0	3.25456e-07	0	4.52357e-05	no
O-ACETYLHOMOSERINE-THIOL-LYASE-RXN: (expasy) O-acetylhomoserine aminocarboxypropyltransferase [2.5.1.49]	0.000124631	8.1678e-05	8.23395e-05	8.53009e-05	7.07634e-05	7.09844e-05	no
O-SUCCHOMOSERLYASE-RXN: (expasy) Cystathionine gamma-synthase [2.5.1.48]	0.000794863	2.65282e-05	1.70291e-05	2.6318e-05	1.90931e-05	7.52628e-05	no
O-SUCCINYLBENZOATE-COA-LIG-RXN: (expasy) o-succinylbenzoate--CoA ligase [6.2.1.26]	1.72306e-06	1.00305e-06	3.92096e-06	9.55756e-07	1.02279e-05	3.68649e-05	no
O-SUCCINYLBENZOATE-COA-SYN-RXN: (expasy) o-succinylbenzoate synthase [4.2.1.113]	6.92251e-06	4.91218e-06	3.96282e-06	1.14869e-06	1.54099e-05	2.5762e-05	no
OCTAPRENYL-METHYL-METHOXY-BENZOQ-OH-RXN: (expasy) 3-demethoxyubiquinol 3-hydroxylase [1.14.99.60]	0	0	0	0	0	1.50084e-06	no
OHACYL-COA-DEHYDROG-RXN: (expasy) 3-hydroxyacyl-CoA dehydrogenase [1.1.1.35]	7.54169e-06	1.4903e-05	3.20771e-05	2.96659e-05	1.29841e-05	0.000117791	no
OHBUTYRYL-COA-EPIM-RXN: (expasy) 3-hydroxybutyryl-CoA epimerase [5.1.2.3]	1.17756e-07	0	0	5.9905e-08	2.86559e-07	1.19952e-05	no
OHMETHYLBILANESYN-RXN: (expasy) Hydroxymethylbilane synthase [2.5.1.61]	7.05821e-05	9.28784e-05	7.32365e-05	8.24389e-05	8.39188e-05	0.000109653	no
OHMETPYRKIN-RXN: (expasy) Hydroxymethylpyrimidine kinase [2.7.1.49]	4.48389e-05	0.000120303	0.000104583	8.01155e-05	9.1987e-05	7.94883e-05	no
OLEATE-HYDRATASE-RXN: (expasy) Oleate hydratase [4.2.1.53]	6.89131e-05	4.53036e-05	5.23537e-05	2.65317e-05	4.74529e-05	2.88641e-05	no
OLIGOGALACTURONIDE-LYASE-RXN: (expasy) Oligogalacturonide lyase [4.2.2.6]	1.81352e-06	0	0	0	8.16761e-07	0	no
OMEGA-AMIDASE-RXN: (expasy) Omega-amidase [3.5.1.3]	9.15673e-08	0	0	0	0	6.58212e-06	no
ORNCARBAMTRANSFER-RXN: (expasy) Ornithine carbamoyltransferase [2.1.3.3]	0.000213244	0.000240039	0.000240625	0.000255948	0.000245852	0.000220826	no
ORNDECARBOX-RXN: (expasy) Ornithine decarboxylase [4.1.1.17]	4.73403e-07	2.5982e-07	0	0	4.09247e-07	9.93211e-05	no
ORNITHINE--OXO-ACID-AMINOTRANSFERASE-RXN: (expasy) Ornithine aminotransferase [2.6.1.13]	1.30579e-05	1.04193e-05	1.0143e-05	2.53183e-06	3.83538e-06	2.48398e-05	no
ORNITHINE-CYCLODEAMINASE-RXN: (expasy) Ornithine cyclodeaminase [4.3.1.12]	4.25341e-06	2.73848e-06	1.40022e-06	5.36121e-07	7.84786e-06	1.8732e-07	no
ORNITHINE-GLU-AMINOTRANSFERASE-RXN: (metacyc) Ornithine--oxo-glutarate aminotransferase [2.6.1.13]	1.30579e-05	1.04193e-05	1.0143e-05	2.53183e-06	3.83538e-06	2.48398e-05	no
OROPRIBTRANS-RXN: (expasy) Orotate phosphoribosyltransferase [2.4.2.10]	0.000282217	0.000199007	0.000205719	0.000213272	0.000209124	0.000195875	no
OROTATE-REDUCTASE-NADH-RXN: (expasy) Dihydroorotate dehydrogenase (NAD(+)) [1.3.1.14]	2.14693e-05	1.08004e-05	1.19543e-05	5.20423e-06	7.98287e-06	3.87064e-06	no
OROTPDECARB-RXN: (expasy) Orotidine-5'-phosphate decarboxylase [4.1.1.23]	0.000247757	0.000189188	0.000192742	0.000209028	0.00019892	0.000165878	no
OXALATE-DECARBOXYLASE-RXN: (expasy) Oxalate decarboxylase [4.1.1.2]	2.06807e-05	3.19922e-05	2.34045e-05	1.1555e-05	3.2285e-05	2.07973e-05	no
OXALOACETATE-TAUTOMERASE-RXN: (expasy) Oxaloacetate tautomerase [5.3.2.2]	0	0	0	0	1.74438e-07	3.27241e-06	no
OXALODECARB-RXN: (expasy) Oxaloacetate decarboxylase [4.1.1.112]	0	0	0	2.84737e-08	0	7.43434e-06	no
OXALYL-COA-DECARBOXYLASE-RXN: (expasy) Oxalyl-CoA decarboxylase [4.1.1.8]	7.96102e-07	1.82522e-06	0	0	2.75475e-07	4.34935e-05	no
P-PANTOCYSDECARB-RXN: (expasy) Phosphopantothenoylcysteine decarboxylase [4.1.1.36]	0.000111183	0.000162105	0.000163231	0.000168528	0.000140141	0.000131784	no
P-PANTOCYSLIG-RXN: (expasy) Phosphopantothenate--cysteine ligase (CTP) [6.3.2.5]	0.000109937	0.000162084	0.000162552	0.000171659	0.000159346	0.000111996	no
PABASYN-RXN: (expasy) Aminodeoxychorismate synthase [2.6.1.85]	6.12779e-05	7.15013e-05	4.70024e-05	3.14566e-05	4.50625e-05	0.00011014	no
PALMITOTRANS-RXN: (expasy) Kdo(2)-lipid IV(A) palmitoleoyltransferase [2.3.1.242]	0	0	0	0	3.22153e-07	6.3669e-06	no
PALMITOYL-COA-HYDROLASE-RXN: (expasy) Palmitoyl-CoA hydrolase [3.1.2.2]	0	0	0	0	1.11938e-06	1.24574e-05	no
PANTEPADENYLYLTRAN-RXN: (expasy) Pantetheine-phosphate adenylyltransferase [2.7.7.3]	0.000203576	0.0001775	0.000175843	0.000195918	0.000188102	0.000157481	no
PANTOATE-BETA-ALANINE-LIG-RXN: (expasy) Pantoate--beta-alanine ligase (AMP-forming) [6.3.2.1]	8.34365e-05	0.000102847	0.000112223	0.00011019	0.000109839	0.000139769	no
PANTOTHENATE-KIN-RXN: (expasy) Pantothenate kinase [2.7.1.33]	0.000243702	0.000264735	0.000264868	0.000257167	0.000221675	0.000227508	no
PDXJ-RXN: (expasy) Pyridoxine 5'-phosphate synthase [2.6.99.2]	2.52807e-05	1.75294e-05	2.77672e-05	1.31752e-05	4.12378e-05	3.13246e-05	no
PENICILLIN-AMIDASE-RXN: (expasy) Penicillin amidase [3.5.1.11]	1.57741e-05	1.02947e-05	1.47078e-06	9.04608e-06	2.67707e-06	4.49521e-05	no
PEPCARBOX-RXN: (expasy) Phosphoenolpyruvate carboxylase [4.1.1.31]	0.000101357	5.2067e-06	2.23492e-06	1.52988e-05	1.14907e-05	6.14284e-05	no
PEPCARBOXYKIN-RXN: (expasy) Phosphoenolpyruvate carboxykinase (ATP) [4.1.1.49]	0.000109895	0.000205834	0.000204692	0.000177278	0.000120763	0.000167576	no
PEPDEPHOS-RXN: (expasy) Pyruvate kinase [2.7.1.40]	0.000214896	0.00019857	0.000229783	0.000205989	0.000205093	0.000225546	no
PEPSYNTH-RXN: (expasy) Pyruvate, water dikinase [2.7.9.2]	1.38005e-05	6.01439e-06	7.6713e-06	1.63367e-05	1.51474e-05	4.49372e-05	no
PEPTIDYLPROLYL-ISOMERASE-RXN: (expasy) Peptidylprolyl isomerase [5.2.1.8]	0.00103087	0.00096653	0.00105872	0.000918879	0.00105121	0.00107656	no
PERILLYL-ALCOHOL-DEHYDROGENASE-RXN: (expasy) Perillyl-alcohol dehydrogenase [1.1.1.144]	0	2.1635e-07	0	0	7.01379e-08	1.05436e-06	no
PEROXID-RXN: (expasy) Peroxidase [1.11.1.7]	0	0	0	4.69728e-08	0	0	no
PGLUCISOM-RXN: (expasy) Glucose-6-phosphate isomerase [5.3.1.9]	0.000239334	0.000231057	0.000206584	0.00021859	0.000224864	0.000253934	no
PGLUCONDEHYDRAT-RXN: (expasy) Phosphogluconate dehydratase [4.2.1.12]	3.4735e-07	0	0	0	1.63413e-07	2.70826e-05	no
PGLYCDEHYDROG-RXN: (expasy) Phosphoglycerate dehydrogenase [1.1.1.95]	9.37523e-05	0.000123969	7.76639e-05	7.71505e-05	0.00010161	0.000106921	no
PGLYCEROLTRANSI-RXN: (expasy) Phosphatidylglycerol--membrane-oligosaccharide glycerophosphotransferase [2.7.8.20]	7.20559e-07	9.70862e-07	1.46814e-07	8.11925e-06	5.65958e-06	2.71913e-05	no
PGPPHOSPHA-RXN: (expasy) Phosphatidylglycerophosphatase [3.1.3.27]	1.30589e-05	7.90991e-06	8.76539e-06	1.5259e-05	1.43288e-05	5.50684e-05	no
PHENDEHYD-RXN: (expasy) Phenylacetaldehyde dehydrogenase [1.2.1.39]	1.89307e-07	0	0	0	0	3.9477e-05	no
PHENOL-2-MONOOXYGENASE-RXN: (expasy) Phenol 2-monooxygenase (NADPH) [1.14.13.7]	0	5.27296e-08	6.08409e-07	0	0	2.07923e-07	no
PHENPRODIOLDEHYDROG-RXN: (expasy) 3-(cis-5,6-dihydroxycyclohexa-1,3-dien-1-yl)propanoate dehydrogenase [1.3.1.87]	2.01942e-07	0	0	5.12219e-08	0	1.88651e-05	no
PHENYLALANINE--TRNA-LIGASE-RXN: (expasy) Phenylalanine--tRNA ligase [6.1.1.20]	0.000388542	0.000343451	0.000339505	0.00042292	0.0004118	0.000343803	no
PHENYLALANINE-DECARBOXYLASE-RXN: (expasy) Phenylalanine decarboxylase [4.1.1.53]	0	0	0	1.9106e-06	5.84054e-07	0	no
PHENYLALANINE-N-ACETYLTRANSFERASE-RXN: (expasy) Phenylalanine N-acetyltransferase [2.3.1.53]	0	0	0	0	0	9.31954e-06	no
PHENYLPYRUVATE-TAUTOMERASE-RXN: (expasy) Phenylpyruvate tautomerase [5.3.2.1]	0	0	0	7.91674e-07	0	0	no
PHLORETIN-HYDROLASE-RXN: (expasy) Phloretin hydrolase [3.7.1.4]	0	2.52104e-06	3.70885e-07	1.90074e-07	1.19759e-05	0	no
PHOSACETYLGLUCOSAMINEMUT-RXN: (expasy) Phosphoacetylglucosamine mutase [5.4.2.3]	0	7.86682e-08	0	0	0	0	no
PHOSACETYLTRANS-RXN: (expasy) Phosphate acetyltransferase [2.3.1.8]	0.000135039	0.000125933	9.22633e-05	0.000105349	8.89298e-05	0.000128798	no
PHOSCHOL-RXN: (expasy) Phospholipase D [3.1.4.4]	0	8.44117e-07	0	0	0	0	no
PHOSGLYPHOS-RXN: (expasy) Phosphoglycerate kinase [2.7.2.3]	0.000168444	0.000153866	0.000169036	0.000209821	0.000184419	0.000157686	no
PHOSICITDEHASE-RXN: (expasy) [Isocitrate dehydrogenase (NADP(+))] kinase [2.7.11.5]	2.61039e-07	0	0	7.4655e-08	1.20671e-07	6.71116e-05	no
PHOSMANMUT-RXN: (expasy) Phosphomannomutase [5.4.2.8]	2.53292e-05	2.47611e-05	4.34783e-05	3.05482e-05	3.84211e-05	7.47016e-05	no
PHOSNACMURPENTATRANS-RXN: (metacyc) UDP-N-acetylmuramoyl-L-alanyl-D-glutamyl-meso-2,6-diaminopimelyl-D-alanyl-D-alanine:undecaprenyl-phosphate transferase [2.7.8.13]	0.000204425	0.000212076	0.000143669	0.000177895	0.00021703	0.000179132	no
PHOSPHAGLYPSYN-RXN: (expasy) CDP-diacylglycerol--glycerol-3-phosphate 1-phosphatidyltransferase [2.7.8.5]	0.00012914	0.000218381	0.000208609	0.000178121	0.000116939	0.000171183	no
PHOSPHASERDECARB-RXN: (expasy) Phosphatidylserine decarboxylase [4.1.1.65]	5.9723e-05	9.01948e-05	6.54296e-05	3.03909e-05	8.83067e-05	8.87391e-05	no
PHOSPHASERSYN-RXN: (expasy) CDP-diacylglycerol--serine O-phosphatidyltransferase [2.7.8.8]	1.87147e-05	2.10839e-05	3.6173e-05	1.65398e-05	1.37531e-05	4.70924e-05	no
PHOSPHATE-BUTYRYLTRANSFERASE-RXN: (expasy) Phosphate butyryltransferase [2.3.1.19]	1.0692e-06	1.00425e-05	4.35788e-06	3.42252e-06	1.43313e-06	9.71811e-06	no
PHOSPHATIDATE-PHOSPHATASE-RXN: (expasy) Phosphatidate phosphatase [3.1.3.4]	7.14587e-05	1.76385e-06	2.24545e-06	3.57375e-06	2.36582e-06	4.76391e-06	no
PHOSPHOENOLPYRUVATE-MUTASE-RXN: (expasy) Phosphoenolpyruvate mutase [5.4.2.9]	0	1.11438e-06	1.93961e-06	2.56678e-07	1.60798e-06	5.92993e-06	no
PHOSPHOGLUCMUT-RXN: (expasy) Phosphoglucomutase (alpha-D-glucose-1,6-bisphosphate-dependent) [5.4.2.2]	0.000154886	0.000187367	0.000121002	0.000101033	0.000145586	0.000144784	no
PHOSPHOKETOLASE-RXN: (expasy) Phosphoketolase [4.1.2.9]	7.94521e-08	0	0	1.05645e-07	1.83783e-07	5.15737e-08	no
PHOSPHOLIPASE-A1-RXN: (expasy) Phospholipase A(1) [3.1.1.32]	0	0	1.13513e-07	2.1552e-07	9.45886e-08	6.77734e-05	no
PHOSPHOLIPASE-A2-RXN: (expasy) Phospholipase A(2) [3.1.1.4]	0	0	0	2.81722e-08	2.00259e-07	2.32819e-06	no
PHOSPHOLIPASE-C-RXN: (expasy) Phospholipase C [3.1.4.3]	1.06613e-06	0	0	4.91545e-07	4.31649e-07	0	no
PHOSPHOMEVALONATE-KINASE-RXN: (expasy) Phosphomevalonate kinase [2.7.4.2]	4.3671e-06	1.74876e-06	3.15867e-07	1.10551e-05	1.4126e-05	1.85906e-06	no
PHOSPHONOACETALDEHYDE-HYDROLASE-RXN: (expasy) Phosphonoacetaldehyde hydrolase [3.11.1.1]	2.96905e-05	1.67669e-05	2.91899e-05	7.89856e-06	1.863e-05	2.15255e-05	no
PHOSPHORIBULOKINASE-RXN: (expasy) Phosphoribulokinase [2.7.1.19]	2.09336e-06	0	0	1.6756e-07	0	3.6107e-05	no
PHTHALATE-45-DIOXYGENASE-RXN: (expasy) Phthalate 4,5-dioxygenase [1.14.12.7]	0	0	0	0	0	0	no
PMPOXI-RXN: (expasy) Pyridoxal 5'-phosphate synthase [1.4.3.5]	1.1727e-05	7.46851e-06	1.41798e-05	1.5632e-05	2.78224e-05	1.86222e-05	no
PNKIN-RXN: (expasy) Pyridoxal kinase [2.7.1.35]	0.000150879	0.000132938	0.000113203	0.000131809	0.000121461	0.00016431	no
PNP-RXN: (expasy) Purine-nucleoside phosphorylase [2.4.2.1]	0.000176894	0.000215117	0.000222849	0.000208574	0.000201712	0.000184067	no
PNPOXI-RXN: (expasy) Pyridoxal 5'-phosphate synthase [1.4.3.5]	1.1727e-05	7.46851e-06	1.41798e-05	1.5632e-05	2.78224e-05	1.86222e-05	no
POLYNUCLEOTIDE-ADENYLYLTRANSFERASE-RXN: (expasy) Polynucleotide adenylyltransferase [2.7.7.19]	4.76e-06	5.79068e-07	0	2.01946e-06	4.8885e-07	3.82603e-05	no
POLYPHOSPHATE-KINASE-RXN: (expasy) Polyphosphate kinase [2.7.4.1]	0.000242293	0.000246511	0.000219031	0.000210955	0.000207092	0.000221757	no
POLYSIALIC-ACID-O-ACETYLTRANSFERASE-RXN: (expasy) Polysialic-acid O-acetyltransferase [2.3.1.136]	0	0	0	0	0	0	no
PORPHOBILSYNTH-RXN: (expasy) Porphobilinogen synthase [4.2.1.24]	6.55758e-05	8.10952e-05	5.4654e-05	8.81349e-05	8.97252e-05	0.000171965	no
PPENTOMUT-RXN: (expasy) Phosphopentomutase [5.4.2.7]	0.000131033	0.000162618	0.000161575	0.000131731	0.000107689	0.000152951	no
PPGPPSYN-RXN: (expasy) Guanosine-3',5'-bis(diphosphate) 3'-diphosphatase [3.1.7.2]	6.22574e-06	2.49625e-05	1.7008e-05	7.91084e-06	1.26239e-05	1.54447e-05	no
PPPGPPHYDRO-RXN: (expasy) Guanosine-5'-triphosphate,3'-diphosphate diphosphatase [3.6.1.40]	1.47588e-05	1.48619e-05	7.48751e-06	2.30982e-05	7.92039e-06	5.63408e-05	no
PRAISOM-RXN: (expasy) Phosphoribosylanthranilate isomerase [5.3.1.24]	9.52428e-05	0.000147269	0.000129174	0.000136214	0.000129066	9.89157e-05	no
PREPHENATE-DEHYDROGENASE-NADP+-RXN: (expasy) Prephenate dehydrogenase (NADP(+)) [1.3.1.13]	0	0	0	2.49336e-07	0	1.70991e-07	no
PREPHENATEDEHYDRAT-RXN: (expasy) Prephenate dehydratase [4.2.1.51]	0.000149329	2.16935e-05	3.37868e-05	6.34481e-05	5.85744e-05	8.16344e-05	no
PREPHENATEDEHYDROG-RXN: (expasy) Prephenate dehydrogenase [1.3.1.12]	8.1779e-06	5.37992e-06	3.03995e-06	2.07945e-05	1.77085e-05	1.0612e-05	no
PRIBFAICARPISOM-RXN: (expasy) isomerase [5.3.1.16]	0.000132773	0.000119357	0.000113391	9.362e-05	0.000119579	0.000134177	no
PRODISULFREDUCT-RXN: (expasy) Protein-disulfide reductase (glutathione) [1.8.4.2]	0	0	0	0	0	0	no
PROLINE--TRNA-LIGASE-RXN: (expasy) Proline--tRNA ligase [6.1.1.15]	0.000219589	0.000212991	0.000198565	0.000224524	0.000211897	0.00021323	no
PROLINE-RACEMASE-RXN: (expasy) Proline racemase [5.1.1.4]	5.20438e-06	1.64318e-05	1.06561e-05	5.45946e-06	6.54277e-06	1.01936e-05	no
PROPANEDIOL-DEHYDRATASE-RXN: (expasy) Propanediol dehydratase [4.2.1.28]	1.35627e-05	1.10762e-05	5.97443e-06	3.72767e-06	2.63845e-05	1.17765e-05	no
PROPANOATECOA-LIGASE-RXN: (metacyc) Propionate--CoA ligase (ADP-forming) [6.2.1.13]	3.75462e-07	2.59247e-06	7.91312e-07	1.49519e-06	7.64214e-07	0	no
PROPCOASYN-RXN: (expasy) Short-chain acyl-CoA dehydrogenase [1.3.8.1]	4.67219e-05	7.72726e-05	8.99783e-05	6.57413e-05	4.79339e-05	3.8272e-05	no
PROPIONATE--COA-LIGASE-RXN: (expasy) Propionate--CoA ligase [6.2.1.17]	1.40104e-07	0	0	4.2853e-08	0	2.47764e-05	no
PROPIONATE-COA-TRANSFERASE-RXN: (expasy) Propionate CoA-transferase [2.8.3.1]	6.09117e-06	2.69186e-05	1.7342e-05	9.72276e-06	5.73798e-07	2.6094e-06	no
PROPIONLACT-RXN: (expasy) Propionate CoA-transferase [2.8.3.1]	6.09117e-06	2.69186e-05	1.7342e-05	9.72276e-06	5.73798e-07	2.6094e-06	no
PROPIONYL-COA-CARBOXY-RXN: (expasy) Propionyl-CoA carboxylase [6.4.1.3]	9.54502e-05	2.16371e-05	2.65357e-05	2.51027e-05	3.10108e-05	6.72167e-06	no
PROPKIN-RXN: (expasy) AMBIGUOUS [2.7.2.1; 2.7.2.14; 2.7.2.15; 2.7.2.7]	0	0	0	7.69818e-08	1.37724e-07	1.56108e-05	no
PROTEIN-TYROSINE-PHOSPHATASE-RXN: (expasy) Protein-tyrosine-phosphatase [3.1.3.48]	0.000160024	0.000297254	0.000201196	0.000197718	0.000199328	0.000233432	no
PROTOCATECHUATE-34-DIOXYGENASE-RXN: (expasy) Protocatechuate 3,4-dioxygenase [1.13.11.3]	0	0	0	3.63469e-08	0	0	no
PROTOCATECHUATE-45-DIOXYGENASE-RXN: (expasy) Protocatechuate 4,5-dioxygenase [1.13.11.8]	0	0	0	0	0	0	no
PROTOCATECHUATE-DECARBOXYLASE-RXN: (expasy) Protocatechuate decarboxylase [4.1.1.63]	0	0	0	0	2.91164e-07	0	no
PROTOHEMEFERROCHELAT-RXN: (expasy) Protoporphyrin ferrochelatase [4.99.1.1]	4.89271e-06	3.15335e-06	3.52958e-06	1.11402e-05	1.46737e-05	4.22543e-05	no
PROTOPORGENOXI-RXN: (expasy) Protoporphyrinogen oxidase [1.3.3.4]	1.08084e-06	1.26513e-06	1.19772e-06	1.41932e-06	5.17048e-07	3.34164e-05	no
PRPPAMIDOTRANS-RXN: (expasy) Amidophosphoribosyltransferase [2.4.2.14]	0.000262886	0.000270641	0.00023983	0.000289937	0.000243528	0.000242887	no
PRPPSYN-RXN: (expasy) Ribose-phosphate diphosphokinase [2.7.6.1]	0.000287532	0.0002347	0.000191762	0.00020452	0.00024513	0.000196229	no
PRTRANS-RXN: (expasy) Anthranilate phosphoribosyltransferase [2.4.2.18]	0.000154775	0.000147009	0.000136813	0.00015065	0.000120929	0.000108118	no
PSERPHOSPHA-RXN: (expasy) Phosphoserine phosphatase [3.1.3.3]	0.000200756	0.000123127	7.60349e-05	9.82657e-05	0.00013112	0.000115466	no
PSERTRANSAM-RXN: (expasy) Phosphoserine transaminase [2.6.1.52]	0.000182996	0.000159517	0.000184169	0.00018485	0.000156533	0.000151236	no
PSERTRANSAMPYR-RXN: (expasy) Phosphoserine transaminase [2.6.1.52]	0.000182996	0.000159517	0.000184169	0.00018485	0.000156533	0.000151236	no
PSEUDOURIDINE-KINASE-RXN: (expasy) Pseudouridine kinase [2.7.1.83]	5.27733e-06	1.0289e-05	9.42384e-06	8.33169e-06	1.65335e-06	5.57116e-05	no
PTAALT-RXN: (expasy) Phosphate propanoyltransferase [2.3.1.222]	5.48157e-05	0.000106974	7.23805e-05	7.73685e-05	9.77831e-05	7.22081e-05	no
PTERIN-DEAMINASE-RXN: (expasy) Pterin deaminase [3.5.4.11]	0	0	0	0	6.73239e-06	0	no
PURINE-NUCLEOSIDASE-RXN: (expasy) Purine nucleosidase [3.2.2.1]	6.73469e-06	2.95809e-07	5.74046e-07	3.54262e-07	4.8126e-06	2.463e-06	no
PUTRESCINE-CARBAMOYLTRANSFERASE-RXN: (expasy) Putrescine carbamoyltransferase [2.1.3.6]	2.70581e-07	1.84949e-07	4.2644e-08	8.71135e-07	1.13753e-05	1.79439e-07	no
PUTRESCINE-OXIDASE-RXN: (expasy) Putrescine oxidase [1.4.3.10]	0	0	0	0	0	4.78034e-08	no
PYFLAVOXRE-RXN: (expasy) Pyruvate synthase [1.2.7.1]	1.50389e-05	5.33302e-05	3.30045e-05	1.73486e-05	6.19099e-05	5.28508e-05	no
PYRAMKIN-RXN: (expasy) Pyridoxal kinase [2.7.1.35]	0.000150879	0.000132938	0.000113203	0.000131809	0.000121461	0.00016431	no
PYRAZIN-RXN: (expasy) Amidase [3.5.1.4]	1.3378e-05	4.31078e-05	1.66354e-05	1.42579e-05	3.13832e-05	7.50767e-06	no
PYRIDOXAL-4-DEHYDROGENASE-RXN: (expasy) Pyridoxal 4-dehydrogenase [1.1.1.107]	0	0	0	0	0	0	no
PYRIDOXINE-4-DEHYDROGENASE-RXN: (expasy) Pyridoxine 4-dehydrogenase [1.1.1.65]	0	0	0	0	0	1.55075e-06	no
PYRIDOXKIN-RXN: (expasy) Pyridoxal kinase [2.7.1.35]	0.000150879	0.000132938	0.000113203	0.000131809	0.000121461	0.00016431	no
PYRIMSYN1-RXN: (expasy) Phosphomethylpyrimidine synthase [4.1.99.17]	0.000208708	0.000136149	0.000165818	0.000137915	0.000158129	0.000137723	no
PYRIMSYN3-RXN: (expasy) Phosphooxymethylpyrimidine kinase [2.7.4.7]	5.69594e-05	3.19167e-05	6.34689e-05	7.05397e-05	4.91867e-05	5.98024e-05	no
PYRNUTRANSHYDROGEN-RXN: (expasy) AMBIGUOUS [1.6.1.1; 1.6.1.2; 1.6.1.3]	8.59359e-06	1.22826e-06	5.42788e-07	2.46829e-07	5.3522e-07	5.98333e-05	no
PYROGLUTAMYL-PEPTIDASE-I-RXN: (expasy) Pyroglutamyl-peptidase I [3.4.19.3]	9.62527e-05	4.3477e-05	2.06659e-05	2.67873e-05	2.65303e-05	2.24473e-05	no
PYRROLINECARBREDUCT-RXN: (expasy) Pyrroline-5-carboxylate reductase [1.5.1.2]	0.00019749	0.000187361	0.000166254	0.000191536	0.000204705	0.000168345	no
PYRUFLAVREDUCT-RXN: (expasy) Pyruvate synthase [1.2.7.1]	1.50296e-05	5.33302e-05	3.30045e-05	1.73486e-05	6.17519e-05	5.26916e-05	no
PYRUVATE-CARBOXYLASE-RXN: (expasy) Pyruvate carboxylase [6.4.1.1]	2.87936e-05	3.38134e-05	2.17845e-05	2.83768e-05	4.76663e-05	1.48534e-05	no
PYRUVATE-DECARBOXYLASE-RXN: (expasy) Pyruvate decarboxylase [4.1.1.1]	0	0	0	0	0	0	no
PYRUVATEORTHOPHOSPHATE-DIKINASE-RXN: (expasy) Pyruvate, phosphate dikinase [2.7.9.1]	0.00011557	0.000168329	0.000186191	0.000191364	0.000170988	0.000135747	no
PYRUVDEH-RXN: NO_NAME	7.66658e-09	0	0	0	9.70124e-08	9.75831e-07	no
PYRUVFORMLY-RXN: (expasy) Formate C-acetyltransferase [2.3.1.54]	7.22262e-05	0.000125065	0.000115288	0.00012162	7.99489e-05	0.000241624	no
QOR-RXN: (expasy) NADPH:quinone reductase [1.6.5.5]	1.70979e-05	9.88686e-07	8.694e-06	0.000108828	5.31819e-05	0.000302708	no
QUERCETIN-23-DIOXYGENASE-RXN: (expasy) Quercetin 2,3-dioxygenase [1.13.11.24]	1.40709e-05	5.95432e-06	3.71273e-06	4.99159e-06	1.52929e-05	4.49599e-05	no
QUERCITRINASE-RXN: (expasy) AMBIGUOUS [3.2.1.40; 3.2.1.66]	2.26873e-05	8.44906e-06	1.39206e-05	4.09373e-06	1.70974e-05	3.77176e-06	no
QUEUOSINE-TRNA-RIBOSYLTRANSFERASE-RXN: NO_NAME	0	3.12588e-07	0	0	0	1.25418e-07	no
QUINATE-5-DEHYDROGENASE-RXN: (expasy) Quinate/shikimate dehydrogenase [1.1.1.282]	2.27791e-07	0	6.69211e-08	0	0	2.49549e-05	no
QUINOLINATE-SYNTHA-RXN: (expasy) Quinolinate synthase [2.5.1.72]	0.000176845	0.000159193	0.000145837	0.00015678	0.000157269	0.000143813	no
QUINOPRIBOTRANS-RXN: (expasy) Nicotinate-nucleotide diphosphorylase (carboxylating) [2.4.2.19]	0.000110982	7.39875e-05	8.09002e-05	9.68759e-05	5.88061e-05	0.000112021	no
R-2-METHYLMALATE-DEHYDRATASE-RXN: (expasy) (R)-2-methylmalate dehydratase [4.2.1.35]	0	0	0	1.98944e-07	0	0	no
R10-RXN: (expasy) 3-hexulose-6-phosphate synthase [4.1.2.43]	3.141e-06	1.40828e-05	1.10281e-05	1.37538e-05	7.94949e-06	2.48969e-06	no
R101-RXN: (expasy) Diaminobutyrate--2-oxoglutarate transaminase [2.6.1.76]	0	2.45734e-06	4.52453e-07	6.46015e-06	4.22205e-07	1.51625e-07	no
R11-RXN: (expasy) AMBIGUOUS [2.8.3.1; 2.8.3.8]	1.54934e-05	3.73057e-05	2.41086e-05	1.90847e-05	6.77107e-06	2.00042e-05	no
R12-RXN: (expasy) 6-phospho-3-hexuloisomerase [5.3.1.27]	7.97481e-06	2.4416e-05	2.72736e-05	8.12733e-06	8.91939e-06	4.63663e-06	no
R122-RXN: (expasy) Hydroxydechloroatrazine ethylaminohydrolase [3.5.4.43]	6.27298e-07	2.073e-07	0	6.34808e-08	1.77313e-06	0	no
R123-RXN: (expasy) N-isopropylammelide isopropylaminohydrolase [3.5.4.42]	1.213e-07	0	0	1.08309e-07	6.73239e-06	1.28403e-05	no
R145-RXN: (expasy) Methylthioribulose 1-phosphate dehydratase [4.2.1.109]	4.87868e-06	2.5233e-05	7.98529e-06	4.95991e-06	5.64559e-06	6.50086e-07	no
R146-RXN: (expasy) Acireductone dioxygenase (Ni(2+)-requiring) [1.13.11.53]	0	0	0	0	1.98258e-07	0	no
R147-RXN: (expasy) Acireductone dioxygenase (Fe(2+)-requiring) [1.13.11.54]	0	0	0	0	1.98258e-07	0	no
R15-RXN: (expasy) Methionine transaminase [2.6.1.88]	1.17146e-07	0	0	0	0	3.25629e-05	no
R165-RXN: (expasy) Ureidoglycolate dehydrogenase [1.1.1.154]	6.96114e-07	4.07078e-06	2.03561e-07	1.19668e-06	5.18521e-06	2.71502e-05	no
R181-RXN: (expasy) 2,6-dihydroxypseudooxynicotine hydrolase [3.7.1.19]	1.82205e-06	0	0	0	6.10975e-07	0	no
R212-RXN: (expasy) Methanogen homoaconitase [4.2.1.114]	0	0	0	7.70682e-06	5.48964e-06	0	no
R213-RXN: (expasy) Methanogen homoaconitase [4.2.1.114]	0	0	0	7.70682e-06	5.48964e-06	0	no
R216-RXN: (expasy) Methanogen homoaconitase [4.2.1.114]	0	0	0	7.70682e-06	5.48964e-06	0	no
R217-RXN: (expasy) Methanogen homoaconitase [4.2.1.114]	0	0	0	7.70682e-06	5.48964e-06	0	no
R222-RXN: (metacyc) 1-octanal dehydrogenase (NAD+) [1.2.1.3]	3.53093e-09	6.1552e-08	1.20197e-07	0	2.18539e-07	2.89955e-06	no
R223-RXN: (metacyc) octanoyl-CoA ligase [6.2.1.3]	6.58913e-05	8.65922e-05	8.27009e-05	6.42304e-05	7.20211e-05	7.65966e-05	no
R229-RXN: (expasy) 2-phosphosulfolactate phosphatase [3.1.3.71]	2.03612e-06	4.33776e-07	1.19606e-06	9.83513e-07	3.72958e-06	1.39372e-06	no
R231-RXN: (expasy) Sulfopyruvate decarboxylase [4.1.1.79]	0	0	0	0	0	0	no
R309-RXN: (metacyc) Acrylonitrilase [3.5.5.7]	0	1.98611e-07	2.04677e-06	3.27897e-07	2.40775e-06	0	no
R311-RXN: (metacyc) Acrylamidase [3.5.1.4]	1.3378e-05	4.31078e-05	1.66354e-05	1.42579e-05	3.13832e-05	1.22475e-06	no
R341-RXN: (expasy) Hydrogenobyrinic acid a,c-diamide synthase (glutamine-hydrolyzing) [6.3.5.9]	7.27769e-07	3.39105e-06	1.78717e-06	1.17595e-05	2.22709e-06	5.60014e-06	no
R342-RXN: (expasy) Cobaltochelatase [6.6.1.2]	3.58001e-06	4.26208e-06	1.19857e-06	1.10867e-05	7.5343e-06	2.24571e-07	no
R345-RXN: (expasy) Adenosylcobyric acid synthase (glutamine-hydrolyzing) [6.3.5.10]	0	7.60257e-08	1.11868e-07	3.87072e-07	0	1.10213e-07	no
R381-RXN: (metacyc) N-acetyl-&beta;-D-glucosamine 2-epimerase [5.1.3.8]	2.38243e-06	3.95196e-06	1.36704e-06	5.2507e-06	2.13862e-05	2.09284e-06	no
R601-RXN: (expasy) Fumarate reductase (quinol) [1.3.5.4]	4.6857e-06	4.01563e-07	0	4.84911e-08	9.37667e-07	1.04206e-05	no
R608-RXN: (expasy) 2,6-dioxo-6-phenylhexa-3-enoate hydrolase [3.7.1.8]	2.46489e-06	0	0	1.64776e-06	7.69717e-07	0	no
R621-RXN: (expasy) Nitric oxide dioxygenase [1.14.12.17]	1.67537e-07	0	0	3.05124e-07	1.5189e-07	4.53819e-05	no
R8-RXN: (expasy) Acetate CoA-transferase [2.8.3.8]	1.54934e-05	3.73057e-05	2.41086e-05	1.90847e-05	6.77107e-06	2.00042e-05	no
R83-RXN: (expasy) 2-hydroxy-3-keto-5-methylthiopentenyl-1-phosphate phosphatase [3.1.3.87]	0	0	0	0	0	1.4599e-07	no
RETINOL-DEHYDROGENASE-RXN: (metacyc) all-trans-retinol dehydrogenase (NAD) [1.1.1.105]	0	0	0	0	0	0	no
RETINYL-PALMITATE-ESTERASE-RXN: (metacyc) retinyl-palmitate esterase [3.1.1.1]	1.43912e-05	1.10268e-06	6.02372e-07	1.06599e-06	1.89188e-05	5.03346e-05	no
RFFTRANS-RXN: (expasy) dTDP-4-amino-4,6-dideoxygalactose transaminase [2.6.1.59]	3.73657e-06	1.03994e-06	2.19683e-06	3.30623e-07	2.03551e-06	1.6364e-05	no
RHAMNISOM-RXN: (expasy) L-rhamnose isomerase [5.3.1.14]	5.47305e-05	2.33735e-05	0.000102947	3.91084e-05	5.45463e-05	7.8463e-05	no
RHAMNULOKIN-RXN: (expasy) Rhamnulokinase [2.7.1.5]	6.77105e-05	0.000121327	7.3367e-05	4.6259e-05	9.26298e-05	0.000103951	no
RHAMNULPALDOL-RXN: (expasy) Rhamnulose-1-phosphate aldolase [4.1.2.19]	3.62202e-05	5.73296e-05	8.35262e-05	5.21491e-05	4.20079e-05	4.80219e-05	no
RIB5PISOM-RXN: (expasy) Ribose-5-phosphate isomerase [5.3.1.6]	0.000207762	0.000167254	0.000153229	0.000147203	0.000170511	0.000192119	no
RIBITOL-2-DEHYDROGENASE-RXN: (expasy) Ribitol 2-dehydrogenase [1.1.1.56]	0	0	0	0	0	0	no
RIBITOL-5-PHOSPHATE-2-DEHYDROGENASE-RXN: (expasy) Ribitol-5-phosphate 2-dehydrogenase (NADP(+)) [1.1.1.405]	1.1124e-06	4.98127e-06	1.37958e-05	4.76896e-06	1.05604e-05	5.54812e-06	no
RIBOFLAVIN-SYN-RXN: (expasy) Riboflavin synthase [2.5.1.9]	6.74467e-05	8.99522e-05	0.000113592	8.92795e-05	7.43576e-05	8.44263e-05	no
RIBOFLAVINKIN-RXN: (expasy) Riboflavin kinase [2.7.1.26]	0.000196278	0.000169881	0.000173652	0.000187469	0.000171784	0.000165615	no
RIBOFLAVINSYNDEAM-RXN: (expasy) Diaminohydroxyphosphoribosylaminopyrimidine deaminase [3.5.4.26]	8.49666e-05	0.000121984	0.000143412	0.00010106	0.00010761	7.25571e-05	no
RIBOFLAVINSYNREDUC-RXN: (expasy) 5-amino-6-(5-phosphoribosylamino)uracil reductase [1.1.1.193]	8.49571e-05	0.000121742	0.000143557	0.00010111	0.000107347	7.25571e-05	no
RIBOKIN-RXN: (expasy) Ribokinase [2.7.1.15]	0.000261194	0.00014537	7.01461e-05	8.85667e-05	0.000123049	0.000143801	no
RIBONUCLEOSIDE-DIP-REDUCTI-RXN: (expasy) Ribonucleoside-diphosphate reductase [1.17.4.1]	0.000295408	6.9621e-05	5.71011e-05	7.42745e-05	0.000179272	0.000237276	no
RIBONUCLEOSIDE-DIP-REDUCTII-RXN: (expasy) Ribonucleoside-diphosphate reductase [1.17.4.1]	0.000295408	6.9621e-05	5.71011e-05	7.42745e-05	0.000179272	0.000237276	no
RIBONUCLEOSIDE-TRIP-REDUCT-RXN: (expasy) Ribonucleoside-triphosphate reductase (formate) [1.1.98.6]	0	1.13101e-07	0	3.14844e-08	1.53044e-07	5.4902e-06	no
RIBOPHOSPHAT-RXN: (expasy) 5-amino-6-(5-phospho-D-ribitylamino)uracil phosphatase [3.1.3.104]	1.50913e-06	8.1387e-07	8.00842e-07	7.52706e-07	1.20027e-06	1.92096e-05	no
RIBOSYLHOMOCYSTEINASE-RXN: (expasy) S-ribosylhomocysteine lyase [4.4.1.21]	0.000174645	0.000163467	0.000153343	0.000170882	0.000116747	0.000147974	no
RIBOSYLNICOTINAMIDE-KINASE-RXN: (expasy) Ribosylnicotinamide kinase [2.7.1.22]	4.42265e-06	7.19213e-06	4.31178e-06	1.54872e-06	4.21691e-06	7.82506e-06	no
RIBOSYLPYRIMIDINE-NUCLEOSIDASE-RXN: (expasy) Ribosylpyrimidine nucleosidase [3.2.2.8]	2.58982e-06	2.71254e-07	9.54289e-07	4.73335e-06	4.56221e-06	5.15801e-05	no
RIBULOKIN-RXN: (expasy) Ribulokinase [2.7.1.16]	9.48952e-06	2.23705e-05	2.25619e-05	1.73446e-05	5.88996e-05	8.79317e-05	no
RIBULP3EPIM-RXN: (expasy) Ribulose-phosphate 3-epimerase [5.1.3.1]	0.000202012	0.000232536	0.000235721	0.000217955	0.000218123	0.000203384	no
RIBULPEPIM-RXN: (expasy) L-ribulose-5-phosphate 4-epimerase [5.1.3.4]	0.000237727	0.000158769	0.000128402	9.71387e-05	0.000129748	0.000218071	no
RNA-3-PHOSPHATE-CYCLASE-RXN: (expasy) RNA 3'-terminal-phosphate cyclase (ATP) [6.5.1.4]	0	0	0	0	2.86146e-07	2.43472e-05	no
RNA-DIRECTED-DNA-POLYMERASE-RXN: (expasy) RNA-directed DNA polymerase [2.7.7.49]	5.52109e-05	0.000115073	0.000222609	0.000120301	0.000168464	0.000132391	no
RNA-DIRECTED-RNA-POLYMERASE-RXN: (expasy) [2.7.7.48]	0	0	0	0	0	2.38449e-06	no
RNA-LIGASE-ATP-RXN: (expasy) RNA ligase (ATP) [6.5.1.3]	0	9.23356e-06	0	0	0	0	no
RR-BUTANEDIOL-DEHYDROGENASE-RXN: (expasy) (R,R)-butanediol dehydrogenase [1.1.1.4]	8.47925e-07	1.28942e-06	7.5483e-08	3.37213e-06	1.52209e-06	1.8923e-06	no
RUBREDOXIN--NAD+-REDUCTASE-RXN: (expasy) Rubredoxin--NAD(+) reductase [1.18.1.1]	2.96073e-07	1.20812e-07	1.55098e-07	4.42948e-07	5.84552e-07	7.62616e-06	no
RXN-0: (expasy) Diamine N-acetyltransferase [2.3.1.57]	1.21942e-05	2.43709e-05	6.91329e-05	1.47177e-05	1.06568e-05	4.72568e-05	no
RXN-1: (expasy) Monoamine oxidase [1.4.3.4]	0	0	0	0	0	0	no
RXN-10: (expasy) Argininosuccinate synthase [6.3.4.5]	0.000179657	0.000192023	0.000183074	0.000211987	0.000193905	0.000202629	no
RXN-10000: (expasy) UDP-4-amino-4,6-dideoxy-N-acetyl-beta-L-altrosamine N-acetyltransferase [2.3.1.202]	9.20645e-07	0	4.36519e-07	0	0	0	no
RXN-10001: (expasy) UDP-2,4-diacetamido-2,4,6-trideoxy-beta-L-altropyranose hydrolase [3.6.1.57]	2.03357e-06	1.41921e-06	4.23471e-06	1.66697e-06	1.29469e-06	7.59453e-07	no
RXN-10002: (expasy) Pseudaminic acid synthase [2.5.1.97]	2.87941e-06	1.58193e-06	7.02337e-06	1.73976e-07	1.21665e-06	0	no
RXN-10003: (expasy) Pseudaminic acid cytidylyltransferase [2.7.7.81]	0	1.66706e-06	1.44326e-06	0	9.00095e-07	1.16582e-07	no
RXN-10009: (expasy) 5'-phosphate synthase [2.5.1.105]	6.05923e-06	0	0	0	0	0	no
RXN-10031: (expasy) 2-amino-3,7-dideoxy-D-threo-hept-6-ulosonate synthase [2.2.1.10]	2.03471e-07	7.24171e-07	4.41043e-07	6.91319e-06	5.40777e-06	4.01002e-07	no
RXN-10032: (expasy) 3-dehydroquinate synthase II [1.4.1.24]	1.06756e-07	0	0	6.95309e-06	5.67249e-06	1.05805e-07	no
RXN-10035: (expasy) S-methyl-5'-thioadenosine deaminase [3.5.4.31]	7.68617e-05	6.7213e-06	7.27027e-06	1.01616e-05	1.69008e-05	2.24193e-06	no
RXN-10040: (expasy) 3-(3-hydroxy-phenyl)propanoic acid hydroxylase [1.14.13.127]	1.76918e-07	0	0	6.80358e-08	0	3.88129e-05	no
RXN-10047: (expasy) Quorum-quenching N-acyl-homoserine lactonase [3.1.1.81]	4.7075e-07	1.55145e-07	4.26053e-07	2.96272e-07	2.10151e-06	1.97425e-06	no
RXN-10048: (expasy) Quorum-quenching N-acyl-homoserine lactonase [3.1.1.81]	4.7075e-07	1.55145e-07	4.26053e-07	2.96272e-07	2.10151e-06	1.97425e-06	no
RXN-10049: (expasy) Quorum-quenching N-acyl-homoserine lactonase [3.1.1.81]	4.7075e-07	1.55145e-07	4.26053e-07	2.96272e-07	2.10151e-06	1.97425e-06	no
RXN-10050: (expasy) Quorum-quenching N-acyl-homoserine lactonase [3.1.1.81]	4.7075e-07	1.55145e-07	4.26053e-07	2.96272e-07	2.10151e-06	1.97425e-06	no
RXN-10051: (expasy) Quorum-quenching N-acyl-homoserine lactonase [3.1.1.81]	4.7075e-07	1.55145e-07	4.26053e-07	2.96272e-07	2.10151e-06	1.97425e-06	no
RXN-10052: (expasy) Quorum-quenching N-acyl-homoserine lactonase [3.1.1.81]	4.7075e-07	1.55145e-07	4.26053e-07	2.96272e-07	2.10151e-06	1.97425e-06	no
RXN-10055: (expasy) GTP cyclohydrolase IIa [3.5.4.29]	0	0	0	8.9898e-06	6.48876e-06	1.7695e-07	no
RXN-10056: (expasy) deformylase [3.5.1.102]	0	0	0	6.30908e-06	4.81129e-06	1.67942e-07	no
RXN-10057: (expasy) 2,5-diamino-6-(ribosylamino)-4(3H)-pyrimidinone 5'-phosphate reductase [1.1.1.302]	0	0	0	0	8.97591e-08	0	no
RXN-10058: (metacyc) 2,5-diamino-6-(5-phosphoribitylamino)pyrimidin-4(3H)-one deaminase [3.5.4.26]	8.49666e-05	0.000121984	0.000143412	0.00010106	0.00010761	7.25571e-05	no
RXN-10059: (expasy) Fatty-acyl-CoA synthase system [2.3.1.86]	1.46276e-05	6.62411e-06	7.53358e-06	1.53837e-06	2.09585e-06	1.71089e-06	yes
RXN-10060: (expasy) Fatty-acyl-CoA synthase system [2.3.1.86]	1.46276e-05	6.62411e-06	7.53358e-06	1.53837e-06	2.09585e-06	1.71089e-06	yes
RXN-10061: (metacyc) 3-hydroxycerotyl-[acp] dehydrase [2.3.1.86]	1.46276e-05	6.62411e-06	7.53358e-06	1.53837e-06	2.09585e-06	1.71089e-06	yes
RXN-10062: (metacyc) trans-hexacos-2-enoyl-[acp] reductase [2.3.1.86]	1.46276e-05	6.62411e-06	7.53358e-06	1.53837e-06	2.09585e-06	1.71089e-06	yes
RXN-10063: (expasy) GTP cyclohydrolase IV [3.5.4.39]	9.20493e-08	0	0	8.31377e-06	6.52222e-06	4.68478e-08	no
RXN-10066: (expasy) Formate--phosphoribosylaminoimidazolecarboxamide ligase [6.3.4.23]	1.0096e-07	0	0	8.46816e-06	5.96617e-06	1.35998e-07	no
RXN-10068: (expasy) Isopentenyl phosphate kinase [2.7.4.26]	9.75149e-08	0	0	7.45168e-06	6.1527e-06	2.39035e-07	no
RXN-10078: (metacyc) 4-methylsalicylate hydroxylase [1.14.13.1]	0	0	0	0	0	0	no
RXN-10079: (metacyc) 5-methylsalicylate hydroxylase [1.14.13.1]	0	0	0	0	0	0	no
RXN-10082: (expasy) Muconolactone Delta-isomerase [5.3.3.4]	0	0	0	5.63674e-08	0	0	no
RXN-10083: (expasy) 3-oxoadipate enol-lactonase [3.1.1.24]	8.37544e-06	1.64718e-07	4.53486e-06	7.84293e-06	2.11503e-06	6.92666e-06	no
RXN-10085: (expasy) 3-oxoadipate CoA-transferase [2.8.3.6]	0	0	0	0	0	2.54421e-06	no
RXN-10086: (expasy) 3-oxoadipyl-CoA thiolase [2.3.1.174]	1.0561e-06	4.4731e-07	0	8.17142e-06	7.87256e-06	2.91287e-05	no
RXN-10089: (metacyc) imidazole acetaldehyde reductase [1.2.1.3]	3.53093e-09	6.1552e-08	1.20197e-07	0	2.18539e-07	2.89955e-06	no
RXN-10125: (expasy) Phenol 2-monooxygenase (NADPH) [1.14.13.7]	0	5.27296e-08	6.08409e-07	0	0	2.07923e-07	no
RXN-10127: (expasy) Phenol 2-monooxygenase (NADPH) [1.14.13.7]	0	5.27296e-08	6.08409e-07	0	0	2.07923e-07	no
RXN-10128: (expasy) Phenol 2-monooxygenase (NADPH) [1.14.13.7]	0	5.27296e-08	6.08409e-07	0	0	2.07923e-07	no
RXN-10129: (expasy) Phenol 2-monooxygenase (NADPH) [1.14.13.7]	0	5.27296e-08	6.08409e-07	0	0	2.07923e-07	no
RXN-10245: (expasy) 2-hydroxymuconate tautomerase [5.3.2.6]	0	0	0	0	1.66285e-05	0	no
RXN-10246: (expasy) 2-oxo-3-hexenedioate decarboxylase [4.1.1.77]	0	0	0	0	0	3.20491e-06	no
RXN-10381: (expasy) 2-oxopent-4-enoate hydratase [4.2.1.80]	1.86876e-07	0	0	1.67666e-07	1.03934e-07	3.42456e-05	no
RXN-10425: (expasy) Protocatechuate 4,5-dioxygenase [1.13.11.8]	0	0	0	0	0	0	no
RXN-10442: (expasy) 2-halobenzoate 1,2-dioxygenase [1.14.12.13]	0	0	0	0	0	0	no
RXN-10443: (expasy) 2-halobenzoate 1,2-dioxygenase [1.14.12.13]	0	0	0	0	0	0	no
RXN-10444: (expasy) 2-halobenzoate 1,2-dioxygenase [1.14.12.13]	0	0	0	0	0	0	no
RXN-10462: (expasy) Glycerol-3-phosphate 1-O-acyltransferase [2.3.1.15]	3.63827e-06	1.92188e-05	6.85067e-06	7.08564e-06	1.75249e-05	0.000126309	no
RXN-10620: (expasy) Cyclic dehypoxanthinyl futalosine synthase [1.21.98.1]	1.2214e-07	1.03283e-06	4.99082e-07	7.71229e-07	1.09113e-05	3.54366e-07	no
RXN-1064: (expasy) Plant seed peroxygenase [1.11.2.3]	0	0	0	0	6.83311e-06	0	no
RXN-10642: (expasy) Uroporphyrinogen decarboxylase [4.1.1.37]	5.74047e-06	4.66872e-06	3.2166e-06	2.64143e-06	1.7111e-05	5.10197e-05	no
RXN-10654: (expasy) AMBIGUOUS [2.3.1.179; 2.3.1.41]	4.89376e-05	3.31571e-06	5.05721e-06	4.90648e-06	1.81789e-05	6.44207e-05	no
RXN-10655: (expasy) 3-oxoacyl-[acyl-carrier-protein] reductase [1.1.1.100]	0.00026104	0.000365999	0.000333448	0.000311572	0.000319257	0.000364513	no
RXN-10656: (expasy) 3-hydroxyacyl-[acyl-carrier-protein] dehydratase [4.2.1.59]	0.000169373	0.000197021	0.000186766	0.000152731	0.000172071	0.000184341	no
RXN-10657: (expasy) Enoyl-[acyl-carrier-protein] reductase (NADH) [1.3.1.9]	7.82664e-05	1.98064e-05	2.9612e-05	1.6153e-05	6.52928e-05	2.99038e-05	no
RXN-10658: (expasy) AMBIGUOUS [2.3.1.179; 2.3.1.41]	4.89376e-05	3.31571e-06	5.05721e-06	4.90648e-06	1.81789e-05	6.44207e-05	no
RXN-10659: (expasy) 3-oxoacyl-[acyl-carrier-protein] reductase [1.1.1.100]	0.00026104	0.000365999	0.000333448	0.000311572	0.000319257	0.000364513	no
RXN-10660: (expasy) 3-hydroxyacyl-[acyl-carrier-protein] dehydratase [4.2.1.59]	0.000169373	0.000197021	0.000186766	0.000152731	0.000172071	0.000184341	no
RXN-10661: (expasy) Enoyl-[acyl-carrier-protein] reductase (NADH) [1.3.1.9]	7.82664e-05	1.98064e-05	2.9612e-05	1.6153e-05	6.52928e-05	2.99038e-05	no
RXN-10669: (expasy) Demethylspheroidene O-methyltransferase [2.1.1.210]	1.27885e-06	4.29678e-07	1.43272e-07	1.31307e-06	0	0	no
RXN-10674: (expasy) Holo-[acyl-carrier-protein] synthase [2.7.8.7]	9.72217e-05	4.97474e-05	7.01007e-05	9.03218e-05	9.27079e-05	8.20222e-05	no
RXN-10699: (expasy) Acetyl-CoA C-acyltransferase [2.3.1.16]	1.94714e-06	2.56017e-06	1.93464e-06	5.11036e-06	5.08523e-06	9.73283e-05	no
RXN-10700: (expasy) Acetyl-CoA C-acyltransferase [2.3.1.16]	1.94714e-06	2.56017e-06	1.93464e-06	5.11036e-06	5.08523e-06	9.73283e-05	no
RXN-10701: (expasy) Acetyl-CoA C-acyltransferase [2.3.1.16]	1.94714e-06	2.56017e-06	1.93464e-06	5.11036e-06	5.08523e-06	9.73283e-05	no
RXN-10708: (expasy) Acyl-CoA hydrolase [3.1.2.20]	0	0	0	0	3.58495e-06	0	no
RXN-10711: (expasy) Carboxylesterase [3.1.1.1]	1.43912e-05	1.10268e-06	6.02372e-07	1.06599e-06	1.89188e-05	5.03346e-05	no
RXN-10715: (expasy) Aldehyde dehydrogenase (NAD(+)) [1.2.1.3]	3.53093e-09	6.1552e-08	1.20197e-07	0	2.18539e-07	2.89955e-06	no
RXN-10717: (metacyc) indole acetaldehyde reductase [1.1.1.2]	8.44282e-06	4.67085e-05	1.40222e-05	1.95213e-05	2.36549e-05	1.4971e-05	no
RXN-10727: (metacyc) myristoyl-ACP hydrolase activity [3.1.2.14]	5.9316e-06	0	9.43556e-07	1.90618e-06	4.3431e-06	1.24574e-05	no
RXN-10737: (expasy) Arsenate reductase (thioredoxin) [1.20.4.4]	0	0	0	0	9.15435e-08	0	no
RXN-10755: (expasy) Beta-D-galactosyl-(1->4)-L-rhamnose phosphorylase [2.4.1.247]	6.40559e-06	0	4.03454e-07	1.80294e-06	1.73796e-06	1.42074e-06	no
RXN-10759: (expasy) (R)-amidase [3.5.1.100]	3.50631e-05	1.39252e-05	2.4272e-05	1.55618e-05	1.78093e-05	3.30239e-05	no
RXN-10760: (expasy) (R)-amidase [3.5.1.100]	3.50631e-05	1.39252e-05	2.4272e-05	1.55618e-05	1.78093e-05	3.30239e-05	no
RXN-10767: (expasy) Carboxylesterase [3.1.1.1]	1.43912e-05	1.10268e-06	6.02372e-07	1.06599e-06	1.89188e-05	5.03346e-05	no
RXN-10769: (expasy) Beta-glucosidase [3.2.1.21]	0.00051742	0.000601904	0.000457606	0.000332886	0.000413607	0.000332647	no
RXN-10773: (expasy) Beta-glucosidase [3.2.1.21]	0.00051742	0.000601904	0.000457606	0.000332886	0.000413607	0.000332647	no
RXN-10778: (expasy) Monoamine oxidase [1.4.3.4]	0	0	0	0	0	0	no
RXN-10780: (expasy) Aldehyde dehydrogenase (NAD(+)) [1.2.1.3]	3.53093e-09	6.1552e-08	1.20197e-07	0	2.18539e-07	2.89955e-06	no
RXN-10781: (metacyc) 5-hydroxytryptophol dehydrogenase [1.1.1.1]	0.000203915	0.000147736	0.000141398	0.000111331	0.000135006	0.000254617	no
RXN-10813: (expasy) Malate dehydrogenase (NAD(P)(+)) [1.1.1.299]	0	0	0	0	0	0	no
RXN-10814: (expasy) AMBIGUOUS [2.6.1.1; 2.6.1.27; 2.6.1.57]	4.90996e-08	0	0	0	0	6.55937e-06	no
RXN-10815: (metacyc) 2-oxo-3-phenylpropanoate dioxygenase [1.13.11.27]	3.32016e-07	0	0	0	0	1.00339e-06	no
RXN-10817: (metacyc) phenylethylamine oxidase [1.4.3.4]	0	0	0	0	0	0	no
RXN-10819: (expasy) Phenylacetate--CoA ligase [6.2.1.30]	0.00010915	0.000111779	0.000113653	6.54831e-05	0.000148038	9.9415e-05	no
RXN-1082: (expasy) Glutaconate CoA-transferase [2.8.3.12]	3.87245e-07	8.87479e-07	1.2174e-06	9.44475e-08	5.52498e-07	1.23392e-06	no
RXN-10827: (expasy) Carboxyvinyl-carboxyphosphonate phosphorylmutase [2.7.8.23]	4.51438e-07	0	1.014e-07	0	7.2509e-07	1.75703e-07	no
RXN-10828: (expasy) Carboxyvinyl-carboxyphosphonate phosphorylmutase [2.7.8.23]	4.51438e-07	0	1.014e-07	0	7.2509e-07	1.75703e-07	no
RXN-1083: (expasy) (R)-2-hydroxyglutaryl-CoA dehydratase [4.2.1.167]	0	0	5.43244e-07	0	0	6.14808e-07	no
RXN-10837: (expasy) Phosphinothricin acetyltransferase [2.3.1.183]	7.7572e-05	0.000110476	5.97696e-05	3.59015e-05	5.82092e-05	4.72581e-05	no
RXN-10847: (expasy) Demethylrebeccamycin-D-glucose O-methyltransferase [2.1.1.164]	1.09469e-06	2.35462e-06	3.1906e-07	1.04234e-06	2.04926e-06	3.91522e-07	no
RXN-10856: (expasy) 7,8-dihydroneopterin epimerase [5.1.99.8]	0	0	0	0	0	5.45453e-06	no
RXN-10857: (expasy) Dihydroneopterin aldolase [4.1.2.25]	0.000145823	0.000126702	0.000101258	0.000100884	0.000140363	0.000211102	no
RXN-10891: (expasy) Vanillate monooxygenase [1.14.13.82]	0	0	0	0	0	0	no
RXN-10907: (expasy) Monoamine oxidase [1.4.3.4]	0	0	0	0	0	0	no
RXN-10908: (expasy) Monoamine oxidase [1.4.3.4]	0	0	0	0	0	0	no
RXN-10910: (expasy) Monoamine oxidase [1.4.3.4]	0	0	0	0	0	0	no
RXN-10911: (expasy) Alcohol dehydrogenase [1.1.1.1]	0.000203915	0.000147736	0.000141398	0.000111331	0.000135006	0.000254617	no
RXN-10912: (expasy) Aldehyde dehydrogenase (NAD(+)) [1.2.1.3]	3.53093e-09	6.1552e-08	1.20197e-07	0	2.18539e-07	2.89955e-06	no
RXN-10913: (expasy) Monoamine oxidase [1.4.3.4]	0	0	0	0	0	0	no
RXN-10915: (metacyc) 3,4-dihydroxyphenylglycol dehydrogenase [1.1.1.1]	0.000203915	0.000147736	0.000141398	0.000111331	0.000135006	0.000254617	no
RXN-10917: (expasy) Aldehyde dehydrogenase (NAD(+)) [1.2.1.3]	3.53093e-09	6.1552e-08	1.20197e-07	0	2.18539e-07	2.89955e-06	no
RXN-10919: (expasy) 4-coumarate--CoA ligase [6.2.1.12]	0	5.62916e-07	0	0	1.03104e-07	0	no
RXN-10949: (expasy) Inositol-phosphate phosphatase [3.1.3.25]	3.49915e-05	5.52568e-05	3.95105e-05	4.25359e-05	8.83032e-05	5.24467e-05	no
RXN-10952: (expasy) Inositol-phosphate phosphatase [3.1.3.25]	3.49915e-05	5.52568e-05	3.95105e-05	4.25359e-05	8.83032e-05	5.24467e-05	no
RXN-10953: (expasy) Inositol-phosphate phosphatase [3.1.3.25]	3.49915e-05	5.52568e-05	3.95105e-05	4.25359e-05	8.83032e-05	5.24467e-05	no
RXN-10954: (expasy) Inositol-phosphate phosphatase [3.1.3.25]	3.49915e-05	5.52568e-05	3.95105e-05	4.25359e-05	8.83032e-05	5.24467e-05	no
RXN-10966: (expasy) Diadenosine hexaphosphate hydrolase (ATP-forming) [3.6.1.61]	2.50033e-06	0	0	8.46521e-07	1.85888e-06	2.27214e-06	no
RXN-10994: (expasy) Holo-[acyl-carrier-protein] synthase [2.7.8.7]	9.72217e-05	4.97474e-05	7.01007e-05	9.03218e-05	9.27079e-05	8.20222e-05	no
RXN-11029: (expasy) acetylglucosaminyltransferase [2.4.1.227]	0.000204349	0.000219618	0.000222565	0.000223996	0.000204823	0.000207072	no
RXN-11032: (expasy) Diacetyl reductase ((S)-acetoin forming) [1.1.1.304]	2.31663e-07	0	2.36266e-06	5.93317e-06	6.52838e-06	1.1725e-05	no
RXN-11036: (expasy) Diacetyl reductase ((R)-acetoin forming) [1.1.1.303]	4.72918e-07	0	0	0	9.23898e-07	0	no
RXN-11046: (expasy) Demethylmenaquinone methyltransferase [2.1.1.163]	4.80415e-05	3.09573e-05	6.6127e-05	6.34159e-05	7.76454e-05	7.72632e-05	no
RXN-11047: (expasy) 1,4-dihydroxy-2-naphthoate polyprenyltransferase [2.5.1.74]	8.85551e-05	2.22187e-05	3.36981e-05	1.69345e-05	4.43276e-05	4.72977e-05	no
RXN-11048: (expasy) Double-stranded uracil-DNA glycosylase [3.2.2.28]	1.57263e-07	0	0	0	1.90986e-07	2.47751e-05	no
RXN-11050: (expasy) Cyclohexane-1,2-dione hydrolase [3.7.1.11]	0	0	0	0	0	0	no
RXN-11051: (expasy) Spore photoproduct lyase [4.1.99.14]	9.51341e-06	2.30395e-06	3.0996e-06	5.78748e-06	1.47884e-06	6.36924e-06	no
RXN-11053: (expasy) 3,4-dehydroadipyl-CoA semialdehyde dehydrogenase (NADP(+)) [1.2.1.77]	1.06267e-07	0	0	0	0	1.91847e-05	no
RXN-11063: (expasy) Methionine gamma-lyase [4.4.1.11]	4.86433e-05	0.000114215	0.000125841	0.00012168	7.4103e-05	0.000101215	no
RXN-11064: (expasy) Methionine gamma-lyase [4.4.1.11]	4.86433e-05	0.000114215	0.000125841	0.00012168	7.4103e-05	0.000101215	no
RXN-11065: (expasy) Serine-type D-Ala-D-Ala carboxypeptidase [3.4.16.4]	0.000273883	0.000514879	0.000330431	0.000283636	0.000432615	0.000483868	no
RXN-11067: (expasy) Monoamine oxidase [1.4.3.4]	0	0	0	0	0	0	no
RXN-11070: (expasy) N-acetylglucosaminyl-diphospho-decaprenol L-rhamnosyltransferase [2.4.1.289]	1.79363e-06	2.45552e-06	0	0	1.40616e-07	2.96852e-07	no
RXN-11106: (expasy) D-arabitol-phosphate dehydrogenase [1.1.1.301]	4.97671e-06	1.39474e-06	6.89275e-08	5.41422e-07	2.47905e-06	1.75545e-07	no
RXN-11108: (expasy) Cysteate synthase [2.5.1.76]	0	1.06967e-07	0	1.02892e-07	0	0	no
RXN-11109: NO_NAME	1.21673e-08	0	0	1.54426e-08	0	1.41894e-05	no
RXN-11110: (expasy) Cycloisomaltooligosaccharide glucanotransferase [2.4.1.248]	3.72947e-06	2.15626e-06	8.17411e-06	2.10875e-06	2.68041e-06	0	no
RXN-11135: NO_NAME	0	0	0	0	0	4.95592e-06	no
RXN-11136: (expasy) HslU--HslV peptidase [3.4.25.2]	1.31878e-05	1.23501e-06	1.10362e-06	1.07533e-05	6.23917e-06	2.47894e-05	no
RXN-11146: (expasy) Sortase A [3.4.22.70]	5.35545e-06	0	0	0	0	0	no
RXN-11148: (expasy) Sortase B [3.4.22.71]	2.78878e-05	4.83849e-05	3.22845e-05	4.95725e-05	1.30497e-05	1.64144e-05	no
RXN-11174: (expasy) Quinate/shikimate dehydrogenase [1.1.1.282]	2.27791e-07	0	6.69211e-08	0	0	2.49549e-05	no
RXN-11176: (expasy) PqqA peptide cyclase [1.21.98.4]	0	0	0	0	0	0	no
RXN-11181: (expasy) Pyrroloquinoline-quinone synthase [1.3.3.11]	0	0	0	0	0	0	no
RXN-11186: (expasy) FAD-dependent urate hydroxylase [1.14.13.113]	0	0	0	0	0	0	no
RXN-11189: (expasy) Mycoredoxin [1.20.4.3]	0	0	0	0	7.53812e-06	0	no
RXN-11192: (expasy) Cocaine esterase [3.1.1.84]	4.72666e-07	4.81577e-05	1.33679e-05	1.5423e-05	1.19627e-05	7.25843e-06	no
RXN-11195: (expasy) Cytochrome-b5 reductase [1.6.2.2]	0	0	0	0	0	9.48758e-08	no
RXN-11209: (expasy) Dihydropyrimidine dehydrogenase (NADP(+)) [1.3.1.2]	0	1.59632e-06	6.25702e-07	2.67516e-06	2.50422e-06	1.24644e-06	no
RXN-11210: (expasy) Beta-ureidopropionase [3.5.1.6]	0	0	0	0	0	0	no
RXN-11211: (expasy) Dihydropyrimidinase [3.5.2.2]	2.00071e-05	1.96571e-05	1.28506e-05	1.04131e-05	1.87912e-05	5.07688e-05	no
RXN-11213: (expasy) Methylmalonate-semialdehyde dehydrogenase (CoA acylating) [1.2.1.27]	2.00376e-06	7.2452e-08	0	2.76928e-07	4.84536e-06	1.58172e-07	no
RXN-11217: (expasy) Dihydropyrimidinase [3.5.2.2]	2.00071e-05	1.96571e-05	1.28506e-05	1.04131e-05	1.87912e-05	5.07688e-05	no
RXN-11219: (expasy) Catechol 2,3-dioxygenase [1.13.11.2]	0	0	0	0	4.09709e-06	0	no
RXN-1122: (expasy) 4-coumarate--CoA ligase [6.2.1.12]	0	5.62916e-07	0	0	1.03104e-07	0	no
RXN-11236: (expasy) Nitrate reductase (quinone) [1.7.5.1]	1.87599e-08	0	0	0	3.00385e-07	6.29021e-06	no
RXN-11237: (expasy) Formate dehydrogenase-N [1.17.5.3]	1.49177e-08	3.16459e-07	0	0	0	4.44178e-06	no
RXN-11245: (expasy) 3-hydroxyacyl-CoA dehydrogenase [1.1.1.35]	7.54169e-06	1.4903e-05	3.20771e-05	2.96659e-05	1.29841e-05	0.000117791	no
RXN-11246: (expasy) Acetyl-CoA C-acyltransferase [2.3.1.16]	1.94714e-06	2.56017e-06	1.93464e-06	5.11036e-06	5.08523e-06	9.73283e-05	no
RXN-1126: (expasy) 4-coumarate--CoA ligase [6.2.1.12]	0	5.62916e-07	0	0	1.03104e-07	0	no
RXN-11277: (expasy) Diacylglycerol diphosphate phosphatase [3.1.3.81]	1.02327e-07	0	0	0	0	4.03795e-06	no
RXN-11283: (expasy) Glucose-6-phosphate dehydrogenase (coenzyme-F420) [1.1.98.2]	0	0	0	0	6.24821e-08	0	no
RXN-11290: (expasy) Peptidoglycan-N-acetylglucosamine deacetylase [3.5.1.104]	8.26729e-06	2.75223e-06	1.06294e-05	2.39884e-06	3.16939e-06	2.13263e-06	no
RXN-11291: (expasy) Peptidoglycan glycosyltransferase [2.4.1.129]	6.99157e-05	6.27629e-05	8.45384e-05	8.35514e-05	8.34294e-05	0.000227931	no
RXN-11295: (expasy) Lipid II:glycine glycyltransferase [2.3.2.16]	9.64446e-08	0	4.09267e-08	1.82676e-07	3.75963e-07	0	no
RXN-11296: (expasy) glycyltransferase [2.3.2.17]	7.81134e-08	0	0	3.74396e-08	2.43813e-06	5.35241e-08	no
RXN-11297: (expasy) glycyltransferase [2.3.2.18]	6.37881e-07	1.83188e-07	0	1.06634e-07	6.29029e-07	1.11255e-07	no
RXN-11298: (expasy) D-alanine--(R)-lactate ligase [6.1.2.1]	1.94827e-07	1.71888e-08	3.6922e-08	0	1.10433e-07	0	no
RXN-11302: (metacyc) peptidoglycan transpeptidase (Gram-negative bacteria) [3.4.16.4]	0.000273883	0.000514879	0.000330431	0.000283636	0.000432615	0.000483868	no
RXN-11310: (expasy) Lipid II:glycine glycyltransferase [2.3.2.16]	9.64446e-08	0	4.09267e-08	1.82676e-07	3.75963e-07	0	no
RXN-11313: (expasy) Chitin disaccharide deacetylase [3.5.1.105]	7.30657e-08	0	0	6.06357e-08	9.47222e-08	1.18991e-05	no
RXN-11319: (expasy) 2-iminoacetate synthase [4.1.99.19]	3.90105e-05	0.000132624	8.6415e-05	3.50795e-05	8.73154e-05	9.54186e-05	no
RXN-11322: (expasy) Pyridoxal 5'-phosphate synthase (glutamine hydrolyzing) [4.3.3.6]	0.000194768	0.000192036	0.000140268	0.00023284	0.000141595	0.000111081	no
RXN-11326: (metacyc) (KDO)3-lipid IVA (2->4) 3-deoxy-D-manno-octulosonic acid transferase [2.4.99.15]	0	0	0	0	0	0	no
RXN-11328: (expasy) 3-deoxy-D-manno-octulosonic acid kinase [2.7.1.166]	0	3.1112e-07	0	0	0	2.69767e-07	no
RXN-11329: (expasy) Bromide peroxidase [1.11.1.18]	9.90291e-08	1.20261e-06	2.39432e-06	1.03339e-06	5.62832e-07	8.65122e-07	no
RXN-11342: (expasy) D-aspartate ligase [6.3.1.12]	4.88694e-06	0	0	9.64922e-07	7.10345e-06	0	no
RXN-11344: (expasy) D-aspartate ligase [6.3.1.12]	4.88694e-06	0	0	9.64922e-07	7.10345e-06	0	no
RXN-11346: (expasy) acetylglucosaminyltransferase [2.4.1.227]	0.000204349	0.000219618	0.000222565	0.000223996	0.000204823	0.000207072	no
RXN-11347: (expasy) Phospho-N-acetylmuramoyl-pentapeptide-transferase [2.7.8.13]	0.000204425	0.000212076	0.000143669	0.000177895	0.00021703	0.000179132	no
RXN-11348: (expasy) Peptidoglycan glycosyltransferase [2.4.1.129]	6.99157e-05	6.27629e-05	8.45384e-05	8.35514e-05	8.34294e-05	0.000227931	no
RXN-11350: (expasy) Peptidoglycan glycosyltransferase [2.4.1.129]	6.99157e-05	6.27629e-05	8.45384e-05	8.35514e-05	8.34294e-05	0.000227931	no
RXN-11351: (expasy) Serine-type D-Ala-D-Ala carboxypeptidase [3.4.16.4]	0.000273883	0.000514879	0.000330431	0.000283636	0.000432615	0.000483868	no
RXN-11361: (expasy) Molybdopterin-synthase adenylyltransferase [2.7.7.80]	1.51114e-05	1.96311e-05	1.69633e-05	1.97256e-05	6.47303e-06	4.31697e-05	no
RXN-11363: (expasy) D-glycero-alpha-D-manno-heptose 1-phosphate guanylyltransferase [2.7.7.71]	8.74777e-07	9.12047e-07	3.36963e-07	3.16344e-07	1.2078e-06	0	no
RXN-11364: (expasy) D-glycero-alpha-D-manno-heptose-7-phosphate kinase [2.7.1.168]	3.27446e-06	1.04545e-06	0	0	1.50937e-06	0	no
RXN-11365: (expasy) D-glycero-alpha-D-manno-heptose-1,7-bisphosphate 7-phosphatase [3.1.3.83]	0	0	3.9472e-07	4.22927e-07	0	0	no
RXN-11371: (expasy) 2-(3-amino-3-carboxypropyl)histidine synthase [2.5.1.108]	0	0	0	9.67786e-06	7.04789e-06	4.30714e-08	no
RXN-11375: (expasy) Ceramidase [3.5.1.23]	0	0	3.47963e-06	0	1.99548e-07	0	no
RXN-11396: (expasy) 8-oxo-dGTP diphosphatase [3.6.1.55]	4.79464e-05	6.33257e-05	7.78044e-05	0.000128532	8.63208e-05	0.000104351	no
RXN-11453: (expasy) Formaldehyde dismutase [1.2.98.1]	0	0	0	0	0	1.68497e-05	no
RXN-11455: (expasy) 8-oxoguanine deaminase [3.5.4.32]	1.22587e-06	1.00825e-06	7.36252e-07	0	2.83036e-06	5.10088e-07	no
RXN-11461: (expasy) Pectate disaccharide-lyase [4.2.2.9]	1.71961e-06	2.68565e-07	2.60118e-06	3.47936e-06	0	1.73587e-07	no
RXN-11470: (metacyc) 7-epicholate dehydrogenase [1.1.1.201]	9.59004e-07	8.748e-07	0	0	4.05734e-06	9.34689e-06	no
RXN-11471: (metacyc) 3,7,12-trioxo-5&beta;-cholanate dehydrogenase [1.1.1.52]	2.81949e-06	5.28388e-07	4.68956e-07	4.20121e-07	5.02325e-06	7.66624e-07	no
RXN-11472: (expasy) 3-beta-hydroxycholanate 3-dehydrogenase (NAD(+)) [1.1.1.391]	5.36008e-06	7.98193e-07	2.9701e-07	2.30549e-07	4.48644e-06	2.30052e-07	no
RXN-11474: (metacyc) 3-oxo-glutaryl-[acp] methyl ester synthase [2.3.1.179; 2.3.1.41]	4.89376e-05	3.31571e-06	5.05721e-06	4.90648e-06	1.81789e-05	6.44207e-05	no
RXN-11475: (expasy) Malonyl-[acyl-carrier protein] O-methyltransferase [2.1.1.197]	4.34031e-05	9.6624e-05	6.24975e-05	3.59674e-05	6.15025e-05	4.42241e-05	no
RXN-11476: (metacyc) 3-oxo-glutaryl-[acp] methyl ester reductase [1.1.1.100]	0.00026104	0.000365999	0.000333448	0.000311572	0.000319257	0.000364513	no
RXN-11477: (expasy) 3-hydroxyacyl-[acyl-carrier-protein] dehydratase [4.2.1.59]	0.000169373	0.000197021	0.000186766	0.000152731	0.000172071	0.000184341	no
RXN-11478: (expasy) Enoyl-[acyl-carrier-protein] reductase (NADH) [1.3.1.9]	7.82664e-05	1.98064e-05	2.9612e-05	1.6153e-05	6.52928e-05	2.99038e-05	no
RXN-11479: (expasy) AMBIGUOUS [2.3.1.179; 2.3.1.41]	4.89376e-05	3.31571e-06	5.05721e-06	4.90648e-06	1.81789e-05	6.44207e-05	no
RXN-11480: (expasy) 3-oxoacyl-[acyl-carrier-protein] reductase [1.1.1.100]	0.00026104	0.000365999	0.000333448	0.000311572	0.000319257	0.000364513	no
RXN-11481: (expasy) 3-hydroxyacyl-[acyl-carrier-protein] dehydratase [4.2.1.59]	0.000169373	0.000197021	0.000186766	0.000152731	0.000172071	0.000184341	no
RXN-11482: (expasy) Enoyl-[acyl-carrier-protein] reductase (NADH) [1.3.1.9]	7.82664e-05	1.98064e-05	2.9612e-05	1.6153e-05	6.52928e-05	2.99038e-05	no
RXN-11483: (expasy) Pimeloyl-[acyl-carrier protein] methyl ester esterase [3.1.1.85]	5.83977e-08	1.23418e-06	0	9.34004e-08	2.33424e-07	3.95915e-05	no
RXN-11484: (expasy) 8-amino-7-oxononanoate synthase [2.3.1.47]	3.28304e-05	2.23682e-05	3.63599e-05	1.26202e-05	1.10191e-05	6.19842e-05	no
RXN-11486: (expasy) specific) [2.5.1.85]	0	0	0	8.15819e-08	0	0	no
RXN-11488: (expasy) diphosphate specific) [2.5.1.89]	0	0	0	6.11912e-06	5.33239e-06	1.9179e-07	no
RXN-11490: (expasy) Raffinose--raffinose alpha-galactosyltransferase [2.4.1.166]	0	3.13728e-08	0	7.71198e-08	2.61382e-07	0	no
RXN-11496: (expasy) Pyruvate dehydrogenase (quinone) [1.2.5.1]	1.54936e-06	6.58423e-07	6.35521e-08	3.98449e-07	2.71574e-07	4.14715e-05	no
RXN-11496-YEAST: (expasy) Pyruvate dehydrogenase (quinone) [1.2.5.1]	1.54936e-06	6.58423e-07	6.35521e-08	3.98449e-07	2.71574e-07	4.14715e-05	no
RXN-11501: (expasy) Alpha-galactosidase [3.2.1.22]	0.000471185	0.000446644	0.000306337	0.000201001	0.000377339	0.000338113	no
RXN-11523: (expasy) Caffeine dehydrogenase [1.17.5.2]	7.30948e-07	5.56611e-07	0	0	2.46677e-06	0	no
RXN-11542: (expasy) Biphenyl-2,3-diol 1,2-dioxygenase [1.13.11.39]	0	0	0	0	0	0	no
RXN-11543: (expasy) 2-hydroxy-6-oxo-6-(2-aminophenyl)hexa-2,4-dienoate hydrolase [3.7.1.13]	2.02089e-06	6.86563e-08	9.18837e-08	0	1.22748e-06	0	no
RXN-11565: (expasy) Carboxynorspermidine synthase [1.5.1.43]	0	0	0	0	0	0	no
RXN-11566: (metacyc) carboxyspermidine synthase [1.5.1.43]	0	0	0	0	0	0	no
RXN-11572: (expasy) AMBIGUOUS [4.2.2.20; 4.2.2.5]	4.25947e-06	3.03501e-06	5.25581e-06	3.42605e-06	3.05081e-06	1.43711e-06	no
RXN-11573: (expasy) 23S rRNA (guanine(745)-N(1))-methyltransferase [2.1.1.187]	1.63371e-06	4.99459e-06	3.68415e-06	2.71359e-05	1.72444e-05	4.03433e-05	no
RXN-11574: (expasy) 23S rRNA (guanine(2445)-N(2))-methyltransferase [2.1.1.173]	8.31953e-05	0.000162895	0.000120575	7.82506e-05	8.72048e-05	0.000115501	no
RXN-11576: (expasy) 16S rRNA (guanine(1207)-N(2))-methyltransferase [2.1.1.172]	3.48517e-07	2.15983e-07	0	2.04601e-07	0	3.99893e-05	no
RXN-11577: (expasy) Chondroitin-sulfate-ABC exolyase [4.2.2.21]	2.42885e-06	8.44103e-07	5.70689e-07	3.15255e-07	8.20351e-07	0	no
RXN-11578: (expasy) 16S rRNA (guanine(527)-N(7))-methyltransferase [2.1.1.170]	4.40816e-07	1.29057e-06	3.80466e-08	2.88519e-07	4.05173e-07	1.61086e-05	no
RXN-11586: (expasy) 23S rRNA (adenine(2503)-C(2))-methyltransferase [2.1.1.192]	0.000134044	0.000139353	9.75403e-05	9.89666e-05	0.000152034	0.000118165	no
RXN-11588: (expasy) 23S rRNA (guanosine(2251)-2'-O)-methyltransferase [2.1.1.185]	1.67036e-05	2.06246e-05	1.05426e-05	9.81005e-06	1.61619e-05	5.73819e-05	no
RXN-11589: (expasy) 23S rRNA (cytidine(2498)-2'-O)-methyltransferase [2.1.1.186]	1.17206e-07	3.62637e-07	0	7.96342e-08	1.89656e-07	4.92879e-05	no
RXN-11591: (expasy) 16S rRNA (cytosine(967)-C(5))-methyltransferase [2.1.1.176]	0.00010684	0.000141826	0.000145977	0.000155323	0.000132682	0.000164697	no
RXN-11592: (expasy) 23S rRNA (pseudouridine(1915)-N(3))-methyltransferase [2.1.1.177]	0.000207258	0.000170226	0.000172153	0.000212368	0.000220298	0.00016118	no
RXN-11593: (expasy) 16S rRNA (cytosine(1407)-C(5))-methyltransferase [2.1.1.178]	3.18108e-05	5.47369e-05	3.80457e-05	5.2529e-05	3.89998e-05	6.27255e-05	no
RXN-11594: (expasy) 16S rRNA (guanine(1405)-N(7))-methyltransferase [2.1.1.179]	0	0	0	0	0	0	no
RXN-11595: (expasy) 16S rRNA (adenine(1408)-N(1))-methyltransferase [2.1.1.180]	0	0	0	0	0	0	no
RXN-11596: (expasy) 23S rRNA (adenine(1618)-N(6))-methyltransferase [2.1.1.181]	1.0855e-05	3.30239e-06	3.57946e-06	4.55139e-07	2.08357e-06	2.5421e-05	no
RXN-11597: (expasy) 23S rRNA (adenine(2085)-N(6))-dimethyltransferase [2.1.1.184]	1.84651e-06	9.27901e-08	2.41633e-06	1.03985e-06	7.16608e-05	1.67515e-07	no
RXN-11598: (expasy) 16S rRNA (uracil(1498)-N(3))-methyltransferase [2.1.1.193]	0.000180299	0.000183216	0.000153373	0.000173371	0.000160751	0.00015606	no
RXN-11599: (expasy) 23S rRNA (guanine(748)-N(1))-methyltransferase [2.1.1.188]	3.73155e-07	5.05715e-07	5.42032e-08	8.49601e-06	5.91199e-06	4.08945e-07	no
RXN-11600: (expasy) 23S rRNA (uracil(747)-C(5))-methyltransferase [2.1.1.189]	6.28167e-05	0.000159601	0.000121398	0.000137944	0.000110997	0.000164326	no
RXN-11601: (expasy) 23S rRNA (uracil(1939)-C(5))-methyltransferase [2.1.1.190]	2.93171e-05	3.97666e-05	8.24742e-05	5.26943e-05	4.20528e-05	9.14387e-05	no
RXN-11602: (expasy) 23S rRNA (cytosine(1962)-C(5))-methyltransferase [2.1.1.191]	4.38063e-05	6.95753e-05	9.96754e-05	5.14135e-05	8.0727e-05	8.08757e-05	no
RXN-11615: (expasy) Chondroitin-sulfate-ABC exolyase [4.2.2.21]	2.42885e-06	8.44103e-07	5.70689e-07	3.15255e-07	8.20351e-07	0	no
RXN-11618: (expasy) Hyaluronoglucosaminidase [3.2.1.35]	1.38381e-05	1.08102e-05	2.02562e-06	8.81221e-06	1.40293e-05	1.37263e-05	no
RXN-11620: (expasy) Hyaluronoglucosaminidase [3.2.1.35]	1.38381e-05	1.08102e-05	2.02562e-06	8.81221e-06	1.40293e-05	1.37263e-05	no
RXN-11627: (expasy) Hyaluronan synthase [2.4.1.212]	9.16224e-05	0.000264498	0.000146973	0.000195036	0.000175732	0.000109201	no
RXN-11633: (expasy) 16S rRNA (adenine(1518)-N(6)/adenine(1519)-N(6))-dimethyltransferase [2.1.1.182]	0.000255943	0.000238068	0.000217052	0.000219606	0.000225248	0.000209003	no
RXN-11635: (expasy) 23S rRNA (guanine(1835)-N(2))-methyltransferase [2.1.1.174]	2.33874e-07	0	0	2.73226e-07	3.82869e-06	3.55707e-05	no
RXN-11637: (expasy) 16S rRNA (cytidine(1402)-2'-O)-methyltransferase [2.1.1.198]	0.000253895	0.000246997	0.000246328	0.000223748	0.000232101	0.000205099	no
RXN-11638: (expasy) 16S rRNA (cytosine(1402)-N(4))-methyltransferase [2.1.1.199]	0.000251891	0.00028921	0.000272888	0.000273971	0.00026325	0.000252756	no
RXN-11662: (expasy) 3-hydroxyacyl-CoA dehydrogenase [1.1.1.35]	7.54169e-06	1.4903e-05	3.20771e-05	2.96659e-05	1.29841e-05	0.000117791	no
RXN-11663: (expasy) Glutathione transferase [2.5.1.18]	2.38683e-07	0	0	7.29211e-07	5.72216e-07	9.75709e-05	no
RXN-11689: (expasy) (S)-sulfolactate dehydrogenase [1.1.1.310]	2.45772e-06	0	0	0	1.11063e-06	0	no
RXN-11691: (expasy) (2R)-sulfolactate sulfo-lyase [4.4.1.24]	2.1928e-06	1.02607e-07	0	0	1.76325e-06	0	no
RXN-11693: (expasy) Separase [3.4.22.49]	0	0	0	0	1.78596e-05	0	no
RXN-11696: (expasy) 2-alkenal reductase (NAD(P)(+)) [1.3.1.74]	6.14961e-08	2.46699e-06	1.46101e-06	2.78516e-06	1.7557e-07	3.84566e-06	no
RXN-11698: (expasy) Ste24 endopeptidase [3.4.24.84]	2.00068e-07	1.09887e-07	1.14208e-07	7.24136e-07	3.40822e-07	4.91233e-07	no
RXN-11714: (expasy) Adenosyl-chloride synthase [2.5.1.94]	1.78851e-06	0	0	0	9.57504e-07	1.12044e-05	no
RXN-11715: (expasy) Purine-nucleoside phosphorylase [2.4.2.1]	0.000176894	0.000215117	0.000222849	0.000208574	0.000201712	0.000184067	no
RXN-11734: (expasy) Medium-chain acyl-CoA dehydrogenase [1.3.8.7]	7.23957e-08	0	0	0	1.72847e-07	3.35913e-06	no
RXN-11737: (expasy) Aspartate transaminase [2.6.1.1]	0.000110101	9.47117e-05	8.93826e-05	8.7861e-05	8.79982e-05	0.000110416	no
RXN-11743: (metacyc) 5'-deoxy-5'-fluoroadenosine phosphorylase [2.4.2.1]	0.000176894	0.000215117	0.000222849	0.000208574	0.000201712	0.000184067	no
RXN-11749: (expasy) Fluoroacetyl-CoA thioesterase [3.1.2.29]	1.50111e-06	0	0	0	4.61852e-07	2.58087e-07	no
RXN-11751: (expasy) Streptothricin hydrolase [3.5.2.19]	1.51846e-06	0	3.86977e-06	0	8.27122e-07	0	no
RXN-11754: (expasy) 2-methoxy-6-polyprenyl-1,4-benzoquinol methylase [2.1.1.201]	3.37324e-07	1.05624e-06	1.10518e-07	3.90862e-07	7.17343e-07	1.30025e-05	no
RXN-11758: (expasy) 3-demethylubiquinol 3-O-methyltransferase [2.1.1.64]	1.62497e-05	1.34668e-05	8.28304e-06	4.28434e-06	9.67936e-06	3.17802e-05	no
RXN-11761: (expasy) Haloacetate dehalogenase [3.8.1.3]	3.52002e-07	3.01405e-06	2.0708e-05	2.73786e-05	1.07571e-05	7.95721e-06	no
RXN-11788: (expasy) GDP-mannose:cellobiosyl-diphosphopolyprenol alpha-mannosyltransferase [2.4.1.252]	0	9.43702e-07	0	0	0	0	no
RXN-11789: (expasy) diphospho-ditrans,octacis-undecaprenol 4-beta-mannosyltransferase [2.4.1.251]	4.10545e-06	0	0	0	0	1.79413e-07	no
RXN-11791: (expasy) Undecaprenyl-phosphate glucose phosphotransferase [2.7.8.31]	8.59778e-06	3.41984e-05	1.16495e-05	1.13399e-05	1.6168e-05	3.27102e-05	no
RXN-11819: (expasy) Plant seed peroxygenase [1.11.2.3]	0	0	0	0	6.83311e-06	0	no
RXN-11820: (expasy) Fatty-acid peroxygenase [1.11.2.4]	0	0	0	1.3289e-06	0	0	no
RXN-11832: (expasy) AMBIGUOUS [2.7.4.14; 2.7.4.25]	0.000155924	0.000171476	0.000177152	0.000187718	0.000199137	0.000154847	no
RXN-11833: (expasy) 16S rRNA pseudouridine(516) synthase [5.4.99.19]	1.46985e-07	1.2232e-07	1.35052e-06	2.44818e-06	1.30927e-07	3.13034e-05	no
RXN-11834: (expasy) 23S rRNA pseudouridine(2457) synthase [5.4.99.20]	8.54856e-08	0	0	0	0	1.39386e-05	no
RXN-11835: (expasy) 23S rRNA pseudouridine(2604) synthase [5.4.99.21]	5.93282e-07	0	0	9.88834e-08	0	4.15048e-05	no
RXN-11836: (expasy) 23S rRNA pseudouridine(2605) synthase [5.4.99.22]	1.09171e-08	0	0	5.56671e-08	1.21366e-06	1.11093e-05	no
RXN-11837: (expasy) 23S rRNA pseudouridine(1911/1915/1917) synthase [5.4.99.23]	1.69508e-05	7.74236e-05	7.95844e-05	6.20695e-05	5.55533e-05	5.68228e-05	no
RXN-11838: (expasy) 23S rRNA pseudouridine(955/2504/2580) synthase [5.4.99.24]	1.08517e-05	7.5737e-05	2.23461e-05	4.18367e-05	3.72775e-05	8.48729e-05	no
RXN-11839: (expasy) tRNA pseudouridine(55) synthase [5.4.99.25]	0.000188251	0.000178501	0.000179598	0.000213525	0.000190811	0.00016975	no
RXN-11840: (expasy) tRNA pseudouridine(65) synthase [5.4.99.26]	7.59969e-06	1.4783e-06	4.44188e-06	2.09447e-06	1.35599e-06	2.89037e-05	no
RXN-11841: (expasy) tRNA pseudouridine(13) synthase [5.4.99.27]	2.02224e-07	2.39542e-07	0	9.38756e-06	5.91312e-06	6.39913e-05	no
RXN-11842: (expasy) tRNA pseudouridine(32) synthase [5.4.99.28]	9.70884e-06	8.61175e-06	9.9884e-06	5.72882e-06	3.74663e-06	5.39522e-05	no
RXN-11843: (expasy) 23S rRNA pseudouridine(746) synthase [5.4.99.29]	5.75721e-08	0	0	2.12521e-08	8.58404e-08	7.78734e-06	no
RXN-11845: (expasy) 23S rRNA (uridine(2552)-2'-O)-methyltransferase [2.1.1.166]	4.93365e-07	9.30643e-07	0	7.3044e-06	6.39637e-06	3.02664e-05	no
RXN-11860: (expasy) tRNA (cytidine(34)-2'-O)-methyltransferase [2.1.1.207]	9.2872e-05	0.000150732	8.66255e-05	9.41617e-05	0.000145461	0.000123354	no
RXN-11865: (expasy) tRNA (cytidine(34)-2'-O)-methyltransferase [2.1.1.207]	9.2872e-05	0.000150732	8.66255e-05	9.41617e-05	0.000145461	0.000123354	no
RXN-11867: (expasy) tRNA (cytidine(32)/uridine(32)-2'-O)-methyltransferase [2.1.1.200]	3.37454e-07	2.06174e-07	0	2.06472e-07	1.52569e-07	3.91157e-05	no
RXN-11869: (expasy) tRNA (cytidine(56)-2'-O)-methyltransferase [2.1.1.206]	1.65636e-07	0	0	9.01299e-06	5.30031e-06	0	no
RXN-11889: (expasy) Protein O-GlcNAc transferase [2.4.1.255]	0	0	0	0	5.86102e-06	0	no
RXN-11890: (expasy) Protein O-GlcNAc transferase [2.4.1.255]	0	0	0	0	5.86102e-06	0	no
RXN-11891: (expasy) Protein O-GlcNAcase [3.2.1.169]	5.15723e-06	8.37918e-06	3.33272e-06	3.52827e-06	1.82742e-06	5.57777e-06	no
RXN-11892: (expasy) Protein O-GlcNAcase [3.2.1.169]	5.15723e-06	8.37918e-06	3.33272e-06	3.52827e-06	1.82742e-06	5.57777e-06	no
RXN-11902: (expasy) Ferredoxin:protochlorophyllide reductase (ATP-dependent) [1.3.7.7]	0	9.53306e-08	0	0	1.74505e-07	3.90882e-07	no
RXN-12002: (expasy) AMBIGUOUS [2.7.4.14; 2.7.4.22]	5.479e-06	2.86885e-05	2.6309e-05	1.36278e-05	2.75294e-06	3.54857e-06	no
RXN-12003: (expasy) Protein-ribulosamine 3-kinase [2.7.1.172]	5.17928e-05	0	1.17928e-06	0	0	2.84106e-07	no
RXN-12005: (expasy) Protein-fructosamine 3-kinase [2.7.1.171]	0	0	0	0	1.78253e-07	0	no
RXN-12014: (expasy) GPR endopeptidase [3.4.24.78]	7.52493e-05	0.000144308	0.000129154	0.000127385	0.000106086	9.36691e-05	no
RXN-12042: (expasy) UDP-N-acetylmuramoyl-L-alanyl-D-glutamate--D-lysine ligase [6.3.2.37]	0	0	0	0	0	0	no
RXN-12057: (expasy) 2',3'-cyclic-nucleotide 3'-phosphodiesterase [3.1.4.37]	0	0	0	1.09886e-07	0	0	no
RXN-12058: (expasy) 2',3'-cyclic-nucleotide 3'-phosphodiesterase [3.1.4.37]	0	0	0	1.09886e-07	0	0	no
RXN-12059: (expasy) 2',3'-cyclic-nucleotide 3'-phosphodiesterase [3.1.4.37]	0	0	0	1.09886e-07	0	0	no
RXN-12060: (expasy) 2',3'-cyclic-nucleotide 3'-phosphodiesterase [3.1.4.37]	0	0	0	1.09886e-07	0	0	no
RXN-12070: (expasy) 2-hydroxy-6-oxonona-2,4-dienedioate hydrolase [3.7.1.14]	1.83594e-07	0	9.84869e-08	9.05109e-08	7.49537e-08	3.99587e-05	no
RXN-12071: (expasy) 3-(cis-5,6-dihydroxycyclohexa-1,3-dien-1-yl)propanoate dehydrogenase [1.3.1.87]	2.01942e-07	0	0	5.12219e-08	0	1.88651e-05	no
RXN-12072: (expasy) 3-phenylpropanoate dioxygenase [1.14.12.19]	3.46225e-07	0	0	1.66831e-07	0	6.31274e-05	no
RXN-12073: (expasy) 3-carboxyethylcatechol 2,3-dioxygenase [1.13.11.16]	3.93217e-07	0	0	6.92687e-08	0	1.68862e-05	no
RXN-12074: (expasy) 4-hydroxy-4-methyl-2-oxoglutarate aldolase [4.1.3.17]	0	2.80526e-07	6.1505e-08	2.84737e-08	4.50751e-07	7.43434e-06	no
RXN-12078: (expasy) Aldose reductase [1.1.1.21]	8.65452e-06	6.0836e-06	2.0246e-05	6.90378e-06	2.32495e-06	4.35977e-06	no
RXN-12086: (expasy) Triacylglycerol lipase [3.1.1.3]	0.000105505	0.000158615	6.16982e-05	5.46752e-05	9.1802e-05	6.59765e-05	no
RXN-12088: (expasy) Alpha-galactosidase [3.2.1.22]	0.000471185	0.000446644	0.000306337	0.000201001	0.000377339	0.000338113	no
RXN-12093: (expasy) 7-cyano-7-deazaguanine synthase [6.3.4.20]	3.8841e-05	7.8257e-05	6.90369e-05	5.19547e-05	6.93346e-05	5.41153e-05	no
RXN-12104: (expasy) Epoxyqueuosine reductase [1.17.99.6]	0.00010667	0.000163662	0.000177385	0.000168689	0.000119479	0.000118448	no
RXN-12124: (expasy) 3-oxo-5-alpha-steroid 4-dehydrogenase (acceptor) [1.3.99.5]	9.24428e-06	1.99423e-06	2.19064e-06	5.94842e-07	6.47241e-07	0	no
RXN-12134: (expasy) Soluble epoxide hydrolase [3.3.2.10]	4.23173e-06	1.2961e-05	8.73762e-06	1.35976e-05	1.14124e-05	1.5372e-05	no
RXN-12140: (expasy) Soluble epoxide hydrolase [3.3.2.10]	4.23173e-06	1.2961e-05	8.73762e-06	1.35976e-05	1.14124e-05	1.5372e-05	no
RXN-12141: (expasy) Soluble epoxide hydrolase [3.3.2.10]	4.23173e-06	1.2961e-05	8.73762e-06	1.35976e-05	1.14124e-05	1.5372e-05	no
RXN-12142: (expasy) Soluble epoxide hydrolase [3.3.2.10]	4.23173e-06	1.2961e-05	8.73762e-06	1.35976e-05	1.14124e-05	1.5372e-05	no
RXN-12144: (expasy) tRNA-guanine(15) transglycosylase [2.4.2.48]	8.78754e-08	0	0	7.47422e-06	5.26835e-06	8.03864e-08	no
RXN-12148: (expasy) Sulfoacetaldehyde reductase [1.1.1.313]	0	0	0	6.6672e-08	0	0	no
RXN-12160: (metacyc) 2-polyprenyl-6-hydroxyphenyl methylase [2.1.1.222]	1.12374e-05	2.42431e-07	0	2.06785e-07	6.44389e-06	1.7627e-05	no
RXN-12171: (expasy) Glycogen phosphorylase [2.4.1.1]	0.00033562	0.000379942	0.000350601	0.000351765	0.000270563	0.000394158	no
RXN-12173: (expasy) Rhamnogalacturonan endolyase [4.2.2.23]	3.20893e-06	1.55218e-06	4.31318e-06	3.62117e-06	1.16149e-06	5.72868e-07	no
RXN-12174: (expasy) Unsaturated rhamnogalacturonyl hydrolase [3.2.1.172]	4.09947e-05	2.17176e-05	3.07821e-05	8.42356e-06	1.47793e-05	1.50895e-05	no
RXN-12177: (expasy) Unsaturated chondroitin disaccharide hydrolase [3.2.1.180]	7.9715e-06	1.81387e-06	1.16127e-06	3.80623e-06	2.86195e-06	0	no
RXN-12178: (expasy) Gellan tetrasaccharide unsaturated glucuronosyl hydrolase [3.2.1.179]	3.66346e-06	3.77433e-06	4.40031e-06	2.79629e-06	5.80804e-06	9.67824e-07	no
RXN-12184: (expasy) Long-chain-fatty-acid--CoA ligase [6.2.1.3]	6.58913e-05	8.65922e-05	8.27009e-05	6.42304e-05	7.20211e-05	7.65966e-05	no
RXN-12193: (metacyc) 4-&alpha;-glucosyltransferase [2.4.1.25]	0.000277095	0.000296487	0.000301282	0.000292855	0.000221749	0.000256532	no
RXN-12195: (expasy) Nucleoside-triphosphate phosphatase [3.6.1.15]	1.0289e-05	3.26588e-07	1.31766e-06	7.48209e-07	1.33599e-05	1.82019e-06	no
RXN-12196: (expasy) Nucleoside-triphosphate phosphatase [3.6.1.15]	1.0289e-05	3.26588e-07	1.31766e-06	7.48209e-07	1.33599e-05	1.82019e-06	no
RXN-12223: (expasy) Diapolycopene oxygenase [1.14.99.44]	0	0	0	0	0	0	no
RXN-12224: (expasy) 4,4'-diapophytoene desaturase (4,4'-diapolycopene-forming) [1.3.8.2]	0	0	0	1.46454e-07	0	6.05418e-07	no
RXN-12227: (expasy) 23S rRNA (uridine(2479)-2'-O)-methyltransferase [2.1.1.208]	2.78908e-06	3.21009e-06	5.01921e-07	1.28289e-06	6.61384e-07	0	no
RXN-1223: (expasy) UDP-sulfoquinovose synthase [3.13.1.1]	0	0	0	1.35327e-07	0	0	no
RXN-12238: (expasy) N,N'-diacetyllegionaminate synthase [2.5.1.101]	0	1.05842e-06	4.20337e-07	3.72681e-07	7.82293e-07	1.06684e-07	no
RXN-12239: (expasy) CMP-N,N'-diacetyllegionaminic acid synthase [2.7.7.82]	1.94129e-06	5.12116e-08	0	0	1.20388e-06	0	no
RXN-12241: (expasy) S-methyl-5'-thioinosine phosphorylase [2.4.2.44]	8.27572e-08	0	0	9.47048e-06	7.0988e-06	1.20256e-07	no
RXN-12247: (expasy) Phytoene desaturase (neurosporene-forming) [1.3.99.28]	0	0	0	0	1.41619e-07	0	no
RXN-12252: (expasy) Carboxylesterase [3.1.1.1]	1.43912e-05	1.10268e-06	6.02372e-07	1.06599e-06	1.89188e-05	5.03346e-05	no
RXN-12269: (expasy) Gellan lyase [4.2.2.25]	1.5408e-06	7.17007e-07	5.65008e-07	2.9939e-07	9.02969e-07	0	no
RXN-12270: (expasy) Gellan tetrasaccharide unsaturated glucuronosyl hydrolase [3.2.1.179]	3.66346e-06	3.77433e-06	4.40031e-06	2.79629e-06	5.80804e-06	9.67824e-07	no
RXN-12280: (expasy) Isoamylase [3.2.1.68]	6.21776e-05	4.02924e-07	1.29305e-06	9.11216e-08	0	7.10687e-07	no
RXN-12299: (expasy) Alcohol dehydrogenase (NADP(+)) [1.1.1.2]	8.44282e-06	4.67085e-05	1.40222e-05	1.95213e-05	2.36549e-05	1.4971e-05	no
RXN-12302: (expasy) Pullulanase [3.2.1.41]	3.05758e-05	5.06555e-05	6.40547e-05	5.97093e-05	2.65402e-05	1.7204e-05	no
RXN-12303: (metacyc) NAD(P)H dehydrogenase (plastoquinone) [1.6.5.2]	8.1099e-05	4.20398e-06	1.88155e-06	5.00043e-06	1.00589e-05	6.83426e-05	no
RXN-12305: (expasy) Cellulose 1,4-beta-cellobiosidase (non-reducing end) [3.2.1.91]	2.34878e-05	4.80019e-05	3.23015e-05	1.90156e-05	3.46621e-05	3.54139e-05	no
RXN-12344: (expasy) Glucuronoarabinoxylan endo-1,4-beta-xylanase [3.2.1.136]	9.33448e-07	2.48021e-06	4.92821e-06	2.84918e-06	2.61588e-06	0	no
RXN-12345: (expasy) Chorismate dehydratase [4.2.1.151]	5.29198e-07	2.34456e-06	2.8943e-06	1.80017e-06	1.38982e-05	4.74035e-07	no
RXN-12353: (expasy) DNA oxidative demethylase [1.14.11.33]	0	0	0	3.36088e-08	0	3.62247e-06	no
RXN-12356: (metacyc) 7,8-dihydro-D-neopterin 2',3'-cyclic phosphate phosphodiesterase [3.1.4.56]	0	0	0	0	6.96477e-06	0	no
RXN-12357: (expasy) 7,8-dihydroneopterin 2',3'-cyclic phosphate phosphodiesterase [3.1.4.56]	0	0	0	0	6.96477e-06	0	no
RXN-12365: (expasy) Ferredoxin--NAD(+) reductase [1.18.1.3]	4.89965e-07	7.17031e-07	5.67604e-08	4.07671e-06	8.61927e-08	3.5481e-05	no
RXN-12366: (expasy) Lipid IV(A) 4-amino-4-deoxy-L-arabinosyltransferase [2.4.2.43]	4.19067e-06	4.83211e-06	9.67072e-06	1.12875e-06	3.93819e-06	7.07802e-05	no
RXN-12367: (expasy) Lipid IV(A) 4-amino-4-deoxy-L-arabinosyltransferase [2.4.2.43]	4.19067e-06	4.83211e-06	9.67072e-06	1.12875e-06	3.93819e-06	7.07802e-05	no
RXN-12375: (expasy) tRNA (guanine(26)-N(2))-dimethyltransferase [2.1.1.216]	1.07065e-07	0	0	9.122e-06	6.01104e-06	1.88779e-07	no
RXN-12376: (expasy) tRNA (guanine(26)-N(2))-dimethyltransferase [2.1.1.216]	1.07065e-07	0	0	9.122e-06	6.01104e-06	1.88779e-07	no
RXN-12377: (expasy) tRNA (guanine(26)-N(2))-dimethyltransferase [2.1.1.216]	1.07065e-07	0	0	9.122e-06	6.01104e-06	1.88779e-07	no
RXN-12391: (expasy) 4-alpha-glucanotransferase [2.4.1.25]	0.000277095	0.000296487	0.000301282	0.000292855	0.000221749	0.000256532	no
RXN-12392: (expasy) Glycogen phosphorylase [2.4.1.1]	0.00033562	0.000379942	0.000350601	0.000351765	0.000270563	0.000394158	no
RXN-12398: (metacyc) xyloglucan XXLG oligosaccharide &beta;-galactosidase [3.2.1.23]	0.00089879	0.000857844	0.000752323	0.000542551	0.000754908	0.000546653	no
RXN-12399: (metacyc) xyloglucan XLXG oligosaccharide &beta;-galactosidase [3.2.1.23]	0.00089879	0.000857844	0.000752323	0.000542551	0.000754908	0.000546653	no
RXN-12400: (metacyc) xyloglucan XLLG oligosaccharide &beta;-galactosidase [3.2.1.23]	0.00089879	0.000857844	0.000752323	0.000542551	0.000754908	0.000546653	no
RXN-12401: (expasy) Xyloglucan-specific endo-beta-1,4-glucanase [3.2.1.151]	0	1.24282e-06	3.9424e-06	4.57248e-07	9.23351e-07	0	no
RXN-12402: (expasy) Alpha-D-xyloside xylohydrolase [3.2.1.177]	0.000231261	0.000265022	0.000189058	0.000119113	0.000207746	0.000172559	no
RXN-1241: (expasy) Coniferyl-aldehyde dehydrogenase [1.2.1.68]	1.27209e-07	1.04582e-05	3.23326e-06	5.02372e-06	0	0	no
RXN-12410: (expasy) Phytoene desaturase (zeta-carotene-forming) [1.3.99.29]	0	0	0	0	1.41619e-07	0	no
RXN-12411: (expasy) All-trans-zeta-carotene desaturase [1.3.99.26]	0	0	0	0	1.41619e-07	0	no
RXN-12414: (expasy) Phytoene desaturase (lycopene-forming) [1.3.99.31]	1.24101e-06	2.64217e-07	1.38604e-07	1.24898e-06	1.41619e-07	0	no
RXN-12430: (expasy) Phospholipase A(1) [3.1.1.32]	0	0	1.13513e-07	2.1552e-07	9.45886e-08	6.77734e-05	no
RXN-12444: (expasy) FMN reductase (NADPH) [1.5.1.38]	5.034e-06	7.73798e-06	8.01034e-06	1.12719e-06	2.82515e-06	2.05983e-05	no
RXN-12445: (expasy) Riboflavin reductase (NAD(P)H) [1.5.1.41]	1.29344e-08	0	0	0	1.63855e-07	5.73904e-06	no
RXN-12446: (expasy) Flavin reductase (NADH) [1.5.1.36]	9.71457e-07	0	0	1.62347e-07	3.96893e-07	5.01064e-05	no
RXN-12448: (expasy) Alcohol dehydrogenase [1.1.1.1]	0.000203915	0.000147736	0.000141398	0.000111331	0.000135006	0.000254617	no
RXN-12456: (expasy) tRNA-dihydrouridine(20) synthase (NAD(P)(+)) [1.3.1.91]	2.45909e-07	4.71403e-07	0	1.10353e-07	3.381e-07	1.96518e-06	no
RXN-12457: (expasy) tRNA-dihydrouridine(47) synthase (NAD(P)(+)) [1.3.1.89]	0	0	3.00116e-07	1.94896e-06	0	0	no
RXN-12458: (expasy) tRNA (guanine(37)-N(1))-methyltransferase [2.1.1.228]	0.000198593	0.000168206	0.000165956	0.00019417	0.000179646	0.000157266	no
RXN-12460: (metacyc) L-asparaginyl-tRNAasn hydrolase [3.1.1.29]	0.000196012	0.000228082	0.000252124	0.000246717	0.000224005	0.000208283	no
RXN-12462: (expasy) 16S rRNA (cytidine(1409)-2'-O)-methyltransferase [2.1.1.227]	5.07782e-06	1.16536e-06	5.34669e-07	2.06302e-06	1.01682e-05	0	no
RXN-12463: (expasy) 23S rRNA (cytidine(1920)-2'-O)-methyltransferase [2.1.1.226]	4.08058e-05	6.65301e-05	5.29657e-05	3.97822e-05	5.18193e-05	3.44732e-05	no
RXN-12464: (expasy) 23S rRNA (adenosine(1067)-2'-O)-methyltransferase [2.1.1.230]	0	0	0	0	0	0	no
RXN-12465: (expasy) 23S rRNA (adenine(2503)-C(8))-methyltransferase [2.1.1.224]	0	0	0	7.08798e-08	0	0	no
RXN-12466: (expasy) tRNA (adenine(58)-N(1))-methyltransferase [2.1.1.220]	3.45019e-05	1.65621e-06	1.537e-06	3.22923e-06	2.51633e-06	1.92927e-06	no
RXN-12472: (expasy) tRNA (adenine(22)-N(1))-methyltransferase [2.1.1.217]	3.71878e-05	6.28256e-05	3.09819e-05	1.92439e-05	5.26836e-05	3.652e-05	no
RXN-12473: (expasy) Molybdopterin synthase sulfurtransferase [2.8.1.11]	0	0	0	0	0	3.18206e-06	no
RXN-12480: (expasy) tRNA(1)(Val) (adenine(37)-N(6))-methyltransferase [2.1.1.223]	7.36468e-05	0.000144169	9.01745e-05	4.41822e-05	9.55976e-05	8.17695e-05	no
RXN-12481: (expasy) Phosphoenolpyruvate carboxykinase (GTP) [4.1.1.32]	5.13799e-06	2.08189e-06	1.13281e-05	2.38599e-05	4.57838e-05	1.47505e-05	no
RXN-12484: (expasy) Alcohol dehydrogenase (NADP(+)) [1.1.1.2]	8.44282e-06	4.67085e-05	1.40222e-05	1.95213e-05	2.36549e-05	1.4971e-05	no
RXN-12490: (expasy) 3-hydroxyacyl-CoA dehydrogenase [1.1.1.35]	7.54169e-06	1.4903e-05	3.20771e-05	2.96659e-05	1.29841e-05	0.000117791	no
RXN-12498: (expasy) 21S rRNA pseudouridine(2819) synthase [5.4.99.43]	0	0	0	0	8.38296e-06	0	no
RXN-12519: (expasy) Delta(3)-Delta(2)-enoyl-CoA isomerase [5.3.3.8]	3.77246e-08	0	0	5.9905e-08	1.3328e-07	8.42372e-06	no
RXN-12538: (expasy) 2-oxuglutarate dioxygenase (ethene-forming) [1.13.12.19]	0	0	0	0	0	0	no
RXN-12558: (metacyc) crotonyl-CoA reductase (NAD+) [1.3.1.44]	3.98758e-05	4.37067e-05	2.42255e-05	9.83964e-06	2.96399e-05	1.62979e-05	no
RXN-12559: (metacyc) trans-2-hexenoyl-CoA reductase (NAD+) [1.3.1.44]	3.98758e-05	4.37067e-05	2.42255e-05	9.83964e-06	2.96399e-05	1.62979e-05	no
RXN-12560: (expasy) Acetoacetyl-CoA reductase [1.1.1.36]	9.26477e-07	1.31094e-06	5.87517e-07	1.24136e-05	5.55269e-06	4.79776e-07	no
RXN-12561: (expasy) AMBIGUOUS [2.3.1.16; 2.3.1.9]	1.94714e-06	2.56017e-06	1.93464e-06	5.11036e-06	5.08523e-06	9.73283e-05	no
RXN-12565: (expasy) AMBIGUOUS [2.3.1.16; 2.3.1.9]	2.74432e-05	5.00825e-05	7.46082e-05	6.66166e-05	3.90599e-05	8.15261e-05	no
RXN-12567: (expasy) Enoyl-CoA hydratase [4.2.1.17]	2.02549e-05	3.09348e-05	2.50205e-05	2.53466e-05	1.79249e-05	6.11011e-05	no
RXN-12570: (expasy) 3-hydroxyacyl-CoA dehydrogenase [1.1.1.35]	7.54169e-06	1.4903e-05	3.20771e-05	2.96659e-05	1.29841e-05	0.000117791	no
RXN-12575: (metacyc) all-trans retinyl-ester hydrolase [3.1.1.1]	1.43912e-05	1.10268e-06	6.02372e-07	1.06599e-06	1.89188e-05	5.03346e-05	no
RXN-12579: (expasy) Triacylglycerol lipase [3.1.1.3]	0.000105505	0.000158615	6.16982e-05	5.46752e-05	9.1802e-05	6.59765e-05	no
RXN-12581: (expasy) All-trans-retinol dehydrogenase (NAD(+)) [1.1.1.105]	0	0	0	0	0	0	no
RXN-12588: (expasy) Cysteine desulfurase [2.8.1.7]	0.000252398	0.000350046	0.000261773	0.000328319	0.000344222	0.000275061	no
RXN-12610: (expasy) Thiamine phosphate synthase [2.5.1.3]	0.000204685	0.000191138	0.000213271	0.000203232	0.000205458	0.000168608	no
RXN-12611: (metacyc) thiamin phosphate synthase [2.5.1.3]	0.000204685	0.000191138	0.000213271	0.000203232	0.000205458	0.000168608	no
RXN-12613: (expasy) Aminopyrimidine aminohydrolase [3.5.99.2]	6.18383e-05	9.21187e-06	7.39088e-06	1.48553e-05	1.41399e-05	4.29631e-06	no
RXN-12618: (expasy) Glutathione gamma-glutamate hydrolase [3.4.19.13]	0	0	0	0	1.27081e-07	1.26394e-07	no
RXN-12625: (metacyc) N,N'-diacetylchitobiose &beta;-N-acetylglucosaminidase [3.2.1.52]	0.000174554	0.000163416	0.000119225	9.10351e-05	0.000133726	0.000106264	no
RXN-12626: (metacyc) chitotriose &beta;-N-acetylglucosaminidase [3.2.1.52]	0.000174554	0.000163416	0.000119225	9.10351e-05	0.000133726	0.000106264	no
RXN-12627: (expasy) N,N'-diacetylchitobiose phosphorylase [2.4.1.280]	1.70251e-06	1.31732e-06	4.51337e-06	9.71666e-07	2.05781e-06	0	no
RXN-12659: (expasy) Plant seed peroxygenase [1.11.2.3]	0	0	0	0	6.83311e-06	0	no
RXN-12673: (expasy) Perakine reductase [1.1.1.317]	0	2.04205e-06	0	2.0356e-06	1.4676e-07	0	no
RXN-12687: (expasy) 3-beta-hydroxycholanate 3-dehydrogenase (NADP(+)) [1.1.1.393]	2.26894e-06	1.07605e-06	6.7449e-08	0	8.69832e-06	9.97612e-06	no
RXN-12688: (expasy) 3-beta-hydroxycholanate 3-dehydrogenase (NADP(+)) [1.1.1.393]	2.26894e-06	1.07605e-06	6.7449e-08	0	8.69832e-06	9.97612e-06	no
RXN-12689: (expasy) 3-alpha-hydroxycholanate dehydrogenase (NADP(+)) [1.1.1.392]	7.52852e-07	0	1.00607e-07	0	8.91138e-07	9.72709e-06	no
RXN-12690: (expasy) 3-oxosteroid 1-dehydrogenase [1.3.99.4]	5.21901e-07	1.15307e-07	2.84821e-06	4.9585e-07	7.31244e-07	0	no
RXN-12705: (expasy) 3-hydroxyacyl-CoA dehydrogenase [1.1.1.35]	7.54169e-06	1.4903e-05	3.20771e-05	2.96659e-05	1.29841e-05	0.000117791	no
RXN-12710: (expasy) Acetyl-CoA C-acyltransferase [2.3.1.16]	1.94714e-06	2.56017e-06	1.93464e-06	5.11036e-06	5.08523e-06	9.73283e-05	no
RXN-12714: (expasy) 3-oxosteroid 1-dehydrogenase [1.3.99.4]	5.21901e-07	1.15307e-07	2.84821e-06	4.9585e-07	7.31244e-07	0	no
RXN-12718: (expasy) hydrolase [3.7.1.17]	0	0	0	1.25788e-07	0	0	no
RXN-12720: (expasy) Sulfate adenylyltransferase [2.7.7.4]	0.000100736	0.000189848	0.000211645	0.000161787	0.000215302	0.000170056	no
RXN-12726: (expasy) Cysteine synthase [2.5.1.47]	0.000167222	0.000211274	0.000248309	0.000266017	0.000247597	0.000241648	no
RXN-12729: (expasy) Cysteine-S-conjugate beta-lyase [4.4.1.13]	2.27506e-07	8.94579e-08	0	0	0	1.86894e-05	no
RXN-12730: (expasy) 5-methyltetrahydropteroyltriglutamate--homocysteine S-methyltransferase [2.1.1.14]	8.96061e-05	9.66093e-05	6.2645e-05	8.29139e-05	5.05445e-05	9.67831e-05	no
RXN-12736: (metacyc) propanal dehydrogenase (acetylating) [1.2.1.87]	5.40483e-06	0	0	0	0	0	no
RXN-12741: (expasy) 3-oxosteroid 1-dehydrogenase [1.3.99.4]	5.21901e-07	1.15307e-07	2.84821e-06	4.9585e-07	7.31244e-07	0	no
RXN-12750: (metacyc) 3-[(3aS,4S,5R,7aS)-5-hydroxy-7a-methyl-1-oxo-octahydro-1H-inden-4-yl]-3-hydroxypropanoate dehydrogenase [1.1.1.35]	7.54169e-06	1.4903e-05	3.20771e-05	2.96659e-05	1.29841e-05	0.000117791	no
RXN-12751: (expasy) Acetyl-CoA C-acyltransferase [2.3.1.16]	1.94714e-06	2.56017e-06	1.93464e-06	5.11036e-06	5.08523e-06	9.73283e-05	no
RXN-12752: (expasy) NAD(P)H-hydrate epimerase [5.1.99.6]	0.000139121	0.000141717	0.000139976	0.000164091	0.000151191	0.000122963	no
RXN-12767: (expasy) N,N-dimethyltransferase [2.1.1.234]	3.43832e-07	0	0	0	0	0	no
RXN-12806: (metacyc) bifunctional ketoisomerase / Nacetyltransferase [2.3.1.197]	0	0	0	0	0	5.39489e-07	no
RXN-12811: (expasy) dTDP-3-amino-3,6-dideoxy-alpha-D-galactopyranose transaminase [2.6.1.90]	3.21455e-06	1.25674e-06	0	1.06221e-06	0	1.92719e-07	no
RXN-12816: (expasy) 8-oxo-dGDP phosphatase [3.6.1.58]	6.11552e-08	0	0	0	0	1.52267e-05	no
RXN-12819: (expasy) Diadenosine hexaphosphate hydrolase (ATP-forming) [3.6.1.61]	2.50033e-06	0	0	8.46521e-07	1.85888e-06	2.27214e-06	no
RXN-12820: (expasy) Diadenosine hexaphosphate hydrolase (ATP-forming) [3.6.1.61]	2.50033e-06	0	0	8.46521e-07	1.85888e-06	2.27214e-06	no
RXN-12839: (expasy) deoxy-alpha-D-galactopyranose-forming) [5.3.2.3]	1.66188e-06	1.64536e-06	3.97101e-08	0	0	0	no
RXN-12886: (expasy) Pyrimidine monooxygenase [1.14.99.46]	0	0	0	0	0	1.20219e-05	no
RXN-12893: (expasy) Cyanase [4.2.1.104]	2.62435e-08	0	0	4.49121e-07	0	1.80957e-05	no
RXN-12894: (expasy) Ureidoacrylate amidohydrolase [3.5.1.110]	1.5873e-07	0	0	0	2.52143e-07	6.36733e-06	no
RXN-12895: (expasy) Ureidoacrylate amidohydrolase [3.5.1.110]	1.5873e-07	0	0	0	2.52143e-07	6.36733e-06	no
RXN-12973: (expasy) Oleoyl-[acyl-carrier-protein] hydrolase [3.1.2.14]	5.9316e-06	0	9.43556e-07	1.90618e-06	4.3431e-06	1.24574e-05	no
RXN-12977: (expasy) 4-O-beta-D-mannosyl-D-glucose phosphorylase [2.4.1.281]	5.99529e-05	4.44228e-05	4.35366e-05	3.14214e-05	2.98594e-05	2.33622e-05	no
RXN-12978: (expasy) Long-chain-fatty-acid--CoA ligase [6.2.1.3]	6.58913e-05	8.65922e-05	8.27009e-05	6.42304e-05	7.20211e-05	7.65966e-05	no
RXN-12979: (expasy) UDP-N-acetylglucosamine kinase [2.7.1.176]	0	0	0	0	5.23425e-06	9.47434e-06	no
RXN-13008: (expasy) 3-oxoacyl-[acyl-carrier-protein] reductase [1.1.1.100]	0.00026104	0.000365999	0.000333448	0.000311572	0.000319257	0.000364513	no
RXN-13009: (expasy) 3-hydroxyacyl-[acyl-carrier-protein] dehydratase [4.2.1.59]	0.000169373	0.000197021	0.000186766	0.000152731	0.000172071	0.000184341	no
RXN-13011: (expasy) Oleoyl-[acyl-carrier-protein] hydrolase [3.1.2.14]	5.9316e-06	0	9.43556e-07	1.90618e-06	4.3431e-06	1.24574e-05	no
RXN-13028: (expasy) Starch synthase (maltosyl-transferring) [2.4.99.16]	6.26809e-06	1.90594e-06	7.26766e-07	3.62221e-06	3.07592e-07	1.12089e-06	no
RXN-1303: (expasy) Acetophenone carboxylase [6.4.1.8]	9.0166e-07	9.55493e-07	3.00196e-07	0	2.78792e-07	7.05889e-07	no
RXN-13030: (metacyc) sepiapterin reductase [(6S)-tetrahydrobiopterin-forming] [1.1.1.325]	0	9.84424e-08	0	0	0	0	no
RXN-13032: (expasy) Lipoyl amidotransferase [2.3.1.200]	0	0	0	0	2.88729e-06	0	no
RXN-13036: (expasy) Octanoyl-[GcvH]:protein N-octanoyltransferase [2.3.1.204]	0	0	0	0	1.60506e-07	0	no
RXN-13037: (metacyc) octanoyl:GcvH transferase [2.3.1.181]	2.49288e-05	2.09506e-05	2.75537e-05	1.18635e-05	4.39635e-05	3.01864e-05	no
RXN-13054: (expasy) N(2)-citryl-N(6)-acetyl-N(6)-hydroxylysine synthase [6.3.2.38]	8.79695e-08	0	0	0	0	1.26009e-07	no
RXN-13056: (expasy) Aerobactin synthase [6.3.2.39]	0	0	0	0	0	8.66976e-08	no
RXN-13072: (expasy) AMBIGUOUS [3.5.1.111; 3.5.1.3]	5.89215e-07	0	0	0	0	6.58212e-06	no
RXN-13118: (expasy) 2-deoxy-scyllo-inosamine dehydrogenase [1.1.1.329]	1.87362e-06	0	0	0	1.15013e-06	8.30761e-08	no
RXN-13121: (expasy) 2-deoxystreptamine glucosyltransferase [2.4.1.284]	0	0	4.12385e-07	0	0	0	no
RXN-13122: (expasy) 2-deoxystreptamine N-acetyl-D-glucosaminyltransferase [2.4.1.283]	0	0	0	0	0	2.08873e-07	no
RXN-13124: (expasy) 2'-deamino-2'-hydroxyneamine 1-alpha-D-kanosaminyltransferase [2.4.1.301]	4.83888e-06	1.41073e-07	0	0	1.36845e-06	0	no
RXN-13125: (expasy) 2'-deamino-2'-hydroxyneamine 1-alpha-D-kanosaminyltransferase [2.4.1.301]	4.83888e-06	1.41073e-07	0	0	1.36845e-06	0	no
RXN-13141: (expasy) ADP-dependent NAD(P)H-hydrate dehydratase [4.2.1.136]	0.000143124	0.000154505	0.000150701	0.000179196	0.000161987	0.000123537	no
RXN-13142: (expasy) NAD(P)H-hydrate epimerase [5.1.99.6]	0.000139121	0.000141717	0.000139976	0.000164091	0.000151191	0.000122963	no
RXN-13145: (expasy) 2'-deamino-2'-hydroxyneamine 1-alpha-D-kanosaminyltransferase [2.4.1.301]	4.83888e-06	1.41073e-07	0	0	1.36845e-06	0	no
RXN-13147: (expasy) 2'-deamino-2'-hydroxyneamine 1-alpha-D-kanosaminyltransferase [2.4.1.301]	4.83888e-06	1.41073e-07	0	0	1.36845e-06	0	no
RXN-13148: (expasy) 2'-deamino-2'-hydroxyneamine 1-alpha-D-kanosaminyltransferase [2.4.1.301]	4.83888e-06	1.41073e-07	0	0	1.36845e-06	0	no
RXN-13149: (expasy) 2'-deamino-2'-hydroxyneamine 1-alpha-D-kanosaminyltransferase [2.4.1.301]	4.83888e-06	1.41073e-07	0	0	1.36845e-06	0	no
RXN-13158: (expasy) 3-isopropylmalate dehydrogenase [1.1.1.85]	0.000193676	0.00017303	0.000182022	0.000162266	0.000175002	0.000154445	no
RXN-13163: (expasy) 3-isopropylmalate dehydratase [4.2.1.33]	0.000484751	0.00057075	0.00048562	0.00039839	0.000507109	0.000418598	no
RXN-13164: (expasy) 2'-deamino-2'-hydroxyneamine 1-alpha-D-kanosaminyltransferase [2.4.1.301]	4.83888e-06	1.41073e-07	0	0	1.36845e-06	0	no
RXN-13171: (expasy) 2,6-dioxo-6-phenylhexa-3-enoate hydrolase [3.7.1.8]	2.46489e-06	0	0	1.64776e-06	7.69717e-07	0	no
RXN-13179: (expasy) 4-hydroxythreonine-4-phosphate dehydrogenase [1.1.1.262]	1.95392e-05	1.72469e-05	4.75687e-05	3.96064e-05	1.43671e-05	2.77119e-05	no
RXN-13181: (expasy) Sialate O-acetylesterase [3.1.1.53]	1.48004e-05	0	4.52242e-07	0	7.0318e-06	1.99358e-07	no
RXN-13182: (expasy) Sialate O-acetylesterase [3.1.1.53]	1.49022e-05	0	4.52242e-07	0	7.0318e-06	7.82261e-07	no
RXN-13191: (expasy) Magnesium-protoporphyrin IX monomethyl ester (oxidative) cyclase [1.14.13.81]	3.8959e-08	1.50736e-08	0	1.79705e-07	1.6706e-07	2.51117e-08	no
RXN-13198: (expasy) Alcohol dehydrogenase [1.1.1.1]	0.000203915	0.000147736	0.000141398	0.000111331	0.000135006	0.000254617	no
RXN-13214: (expasy) L-glutamyl-[BtrI acyl-carrier protein] decarboxylase [4.1.1.95]	2.06001e-06	7.11009e-08	0	0	9.74115e-07	0	no
RXN-13221: (expasy) 2-deoxy-scyllo-inosamine dehydrogenase (AdoMet-dependent) [1.1.99.38]	2.15779e-06	0	0	0	8.29559e-07	6.81066e-08	no
RXN-13222: (expasy) Sepiapterin reductase (L-threo-7,8-dihydrobiopterin forming) [1.1.1.325]	0	9.84424e-08	0	0	0	0	no
RXN-13252: (expasy) UDP-N-acetylglucosamine 4,6-dehydratase (configuration-retaining) [4.2.1.135]	3.69081e-06	1.2848e-06	4.89438e-08	1.44619e-06	1.08178e-06	1.54172e-07	no
RXN-13253: (expasy) UDP-N-acetylbacillosamine N-acetyltransferase [2.3.1.203]	1.82212e-06	1.73707e-07	0	0	1.8469e-07	0	no
RXN-13266: (expasy) Long-chain-fatty-acid--[acyl-carrier-protein] ligase [6.2.1.20]	6.16217e-08	2.18085e-07	0	0	1.91544e-07	1.2883e-05	no
RXN-13267: (expasy) Long-chain-fatty-acid--[acyl-carrier-protein] ligase [6.2.1.20]	6.16217e-08	2.18085e-07	0	0	1.91544e-07	1.2883e-05	no
RXN-13268: (expasy) Long-chain-fatty-acid--[acyl-carrier-protein] ligase [6.2.1.20]	6.16217e-08	2.18085e-07	0	0	1.91544e-07	1.2883e-05	no
RXN-13269: (expasy) transferase [2.7.8.36]	1.96865e-06	9.04757e-06	7.73336e-08	1.27673e-06	6.53472e-07	3.77686e-07	no
RXN-13274: (expasy) acetylgalactosaminyltransferase [2.4.1.290]	2.00155e-06	1.06557e-06	0	1.09015e-06	9.79161e-07	1.20984e-06	no
RXN-13275: (expasy) 4-alpha-N-acetylgalactosaminyltransferase [2.4.1.291]	5.27497e-06	9.33956e-07	0	7.74026e-08	2.77749e-06	0	no
RXN-13276: (expasy) 1,4-N-acetyl-D-galactosaminyltransferase [2.4.1.292]	1.53431e-06	3.61599e-07	3.7096e-07	0	9.27349e-07	0	no
RXN-13277: (expasy) GalNAc(5)-diNAcBac-PP-undecaprenol beta-1,3-glucosyltransferase [2.4.1.293]	4.18691e-06	2.4049e-07	3.01439e-07	1.36678e-06	9.80219e-07	0	no
RXN-13279: (expasy) Acetoacetyl-CoA reductase [1.1.1.36]	9.26477e-07	1.31094e-06	5.87517e-07	1.24136e-05	5.55269e-06	4.79776e-07	no
RXN-13290: (metacyc) 15-tetracosenoate&mdash;CoA ligase [6.2.1.3]	6.58913e-05	8.65922e-05	8.27009e-05	6.42304e-05	7.20211e-05	7.65966e-05	no
RXN-13313: (expasy) Phosphatidylglycerophosphatase [3.1.3.27]	1.30589e-05	7.90991e-06	8.76539e-06	1.5259e-05	1.43288e-05	5.50684e-05	no
RXN-13323: (expasy) 15-cis-phytoene synthase [2.5.1.32]	0	0	0	0	4.31694e-07	0	no
RXN-13374: (expasy) Beta-carotene 15,15'-dioxygenase [1.13.11.63]	0	0	0	2.09988e-06	0	3.30599e-07	no
RXN-13403: (expasy) Uroporphyrinogen-III C-methyltransferase [2.1.1.107]	7.4941e-05	8.46622e-05	6.5353e-05	9.98362e-05	9.25671e-05	8.26635e-05	no
RXN-13404: (expasy) Glycine/sarcosine N-methyltransferase [2.1.1.156]	3.08457e-05	9.48485e-05	6.8298e-05	5.44069e-05	6.04659e-05	5.01345e-05	no
RXN-13405: (expasy) Sarcosine/dimethylglycine N-methyltransferase [2.1.1.157]	3.25382e-06	1.59481e-07	7.04281e-07	9.70299e-07	1.87256e-06	5.03489e-07	no
RXN-13418: (expasy) Alkanesulfonate monooxygenase [1.14.14.5]	1.65302e-07	0	0	3.46876e-08	1.79451e-07	2.54762e-05	no
RXN-13430: (expasy) Palmitoyl-CoA hydrolase [3.1.2.2]	0	0	0	0	1.11938e-06	1.24574e-05	no
RXN-13435: (expasy) Palmitoyl-CoA hydrolase [3.1.2.2]	0	0	0	0	1.11938e-06	1.24574e-05	no
RXN-13437: (expasy) Galactan endo-beta-1,3-galactanase [3.2.1.181]	0	0	0	0	7.01919e-06	0	no
RXN-13439: (expasy) Cyanophycin synthase (L-aspartate-adding) [6.3.2.29]	0	0	8.26305e-07	3.97542e-06	0	8.81882e-07	no
RXN-13449: (expasy) Short-chain acyl-CoA dehydrogenase [1.3.8.1]	4.67219e-05	7.72726e-05	8.99783e-05	6.57413e-05	4.79339e-05	3.8272e-05	no
RXN-13459: (expasy) 2-hydroxymuconate tautomerase [5.3.2.6]	0	0	0	0	1.66285e-05	0	no
RXN-13482: (expasy) Ornithine carbamoyltransferase [2.1.3.3]	0.000213244	0.000240039	0.000240625	0.000255948	0.000245852	0.000220826	no
RXN-13569: (expasy) Glutamate 2,3-aminomutase [5.4.3.9]	0	0	0	0	0	7.57999e-07	no
RXN-13589: (expasy) UDP-2-acetamido-3-amino-2,3-dideoxy-glucuronate N-acetyltransferase [2.3.1.201]	0	0	0	0	0	3.28719e-07	no
RXN-13596: (expasy) UDP-2-acetamido-2-deoxy-ribo-hexuluronate aminotransferase [2.6.1.98]	0	0	0	0	0	1.02813e-07	no
RXN-13602: (metacyc) linustatin &beta;-diglucosidase [3.2.1.21]	0.00051742	0.000601904	0.000457606	0.000332886	0.000413607	0.000332647	no
RXN-13603: (metacyc) neolinustatin &beta;-diglucosidase [3.2.1.21]	0.00051742	0.000601904	0.000457606	0.000332886	0.000413607	0.000332647	no
RXN-13614: (expasy) Long-chain-fatty-acid--CoA ligase [6.2.1.3]	6.58913e-05	8.65922e-05	8.27009e-05	6.42304e-05	7.20211e-05	7.65966e-05	no
RXN-13615: (expasy) Medium-chain acyl-CoA dehydrogenase [1.3.8.7]	7.23957e-08	0	0	0	1.72847e-07	3.35913e-06	no
RXN-13616: (expasy) Enoyl-CoA hydratase [4.2.1.17]	2.02549e-05	3.09348e-05	2.50205e-05	2.53466e-05	1.79249e-05	6.11011e-05	no
RXN-13617: (expasy) Acetyl-CoA C-acyltransferase [2.3.1.16]	1.94714e-06	2.56017e-06	1.93464e-06	5.11036e-06	5.08523e-06	9.73283e-05	no
RXN-13654: (expasy) L-lysine cyclodeaminase [4.3.1.28]	0	0	0	0	1.34195e-07	2.12913e-07	no
RXN-13671: (expasy) Acetaldehyde dehydrogenase (acetylating) [1.2.1.10]	8.55737e-07	2.11417e-06	1.33412e-06	3.41016e-06	7.69112e-06	4.42989e-05	no
RXN-13673: (expasy) Glutathione transferase [2.5.1.18]	2.38683e-07	0	0	7.29211e-07	5.72216e-07	9.75709e-05	no
RXN-13675: (expasy) Glutathione gamma-glutamate hydrolase [3.4.19.13]	0	0	0	0	1.27081e-07	1.26394e-07	no
RXN-13681: (expasy) Aldehyde oxidase [1.2.3.1]	0	0	0	2.3978e-07	0	0	no
RXN-13682: (expasy) 3-oxo-5-alpha-steroid 4-dehydrogenase (acceptor) [1.3.99.5]	9.24428e-06	1.99423e-06	2.19064e-06	5.94842e-07	6.47241e-07	0	no
RXN-13685: (expasy) Adrenodoxin-NADP(+) reductase [1.18.1.6]	4.61817e-05	0	1.29465e-06	1.46368e-06	0	4.16723e-07	no
RXN-13697: (expasy) Aspartate transaminase [2.6.1.1]	0.000110101	9.47117e-05	8.93826e-05	8.7861e-05	8.79982e-05	0.000110416	no
RXN-13698: (expasy) Alanine transaminase [2.6.1.2]	3.77987e-05	3.37718e-07	2.04271e-05	2.75449e-05	7.11706e-07	2.23514e-05	no
RXN-13704: (metacyc) 2,3-dihydroxybenzenesulfonate 2,3-dioxygenase [1.13.11.2]	0	0	0	0	4.09709e-06	0	no
RXN-13706: (expasy) 2-halobenzoate 1,2-dioxygenase [1.14.12.13]	0	0	0	0	0	0	no
RXN-13719: (metacyc) (R)-2-hydroxybutanoate dehydrogenase (NADP+) [1.1.1.272]	3.5337e-07	1.82511e-07	1.14013e-06	1.52936e-06	0	1.15121e-07	no
RXN-13722: (expasy) Methanogen homoaconitase [4.2.1.114]	0	0	0	7.70682e-06	5.48964e-06	0	no
RXN-13733: (expasy) Ceramidase [3.5.1.23]	0	0	3.47963e-06	0	1.99548e-07	0	no
RXN-13749: (expasy) dTDP-6-deoxy-L-talose 4-dehydrogenase (NAD(+)) [1.1.1.339]	0	1.05635e-07	0	0	1.13803e-07	0	no
[truncated: 1,945 more rows]
