# Supplementary material for: The gut microbiota modulates the rate of ALS progression
Source: Research Square preprint supplement (doi:10.21203/rs.3.rs-6370840/v1), 2025-04-17
Supplement: Supplementary file 6 [file e8094c87607fa0d11595d848.xlsx]

## Sheet: A-top30
	Extended data Table 3. a. Top 30 metabolites with the most robust difference (i.e., p-value rank order) for the main effect of ALS progression (all slow versus all fast ALS progression) for human fecal samples. The ratio is colored in pink for metabolites enriched in slow and in green for metabolites enriched in fast progression. Bold figures indicate significant differences. For the sex-specific…
	Super Pathway	Sub Pathway	Biochemical Name	SLOW/FAST	p-value	S/F Females	S/F Males
	Xenobiotics	Food Component/Plant	4-hydroxycinnamate	25.5935	0.0074	46.45	6.18
	N/A	N/A	X-24984	10.4971	0.0067	19.81	1.18
	Xenobiotics	Food Component/Plant	enterodiol	9.24017	0.018	12.82	5.19
	Xenobiotics	Food Component/Plant	syringic acid	9.0905	0.017	8.69	9.48
	Xenobiotics	Benzoate Metabolism	2,4,6-trihydroxybenzoate	8.55869	0.0117	14.43	3.96
	Amino Acid	Phenylalanine Metabolism	N-methylphenylalanine	6.27899	0.0136	5.44	6.82
	N/A	N/A	X-24210	4.98745	0.0201	5.25	4.55
	N/A	N/A	X-24212	4.64065	0.0067	7.52	1.8
	Xenobiotics	Xanthine Metabolism	3,7-dimethylurate	4.58315	0.0064	7.83	3.49
	Lipid	Long Chain Polyunsaturated Fatty Acid (n3 and n6)	tetradecadienoate (14:2)*	4.54342	0.0095	6.6	2.84
	Lipid	Long Chain Polyunsaturated Fatty Acid (n3 and n6)	hexadecadienoate (16:2n6)	3.80153	0.0006	3.15	4.9
	Xenobiotics	Food Component/Plant	vanillate	3.3258	0.0191	3.88	2.81
	N/A	N/A	X-23974	2.96138	0.009	3.36	2.65
	Lipid	Fatty Acid, Monohydroxy	10-hydroxystearate	2.7258	0.0097	2.32	3.24
	Xenobiotics	Chemical	diethyl phosphate	2.05056	0.0117	2.7	1.34
	N/A	N/A	X-21796	0.628179	0.0025	0.52	0.73
	N/A	N/A	X-24027	0.594828	0.007	0.36	0.94
	Nucleotide	Pyrimidine Metabolism, Uracil containing	uridine	0.526763	0.0171	0.48	0.58
	Amino Acid	Leucine, Isoleucine and Valine Metabolism	3-methyl-2-oxobutyrate	0.471948	0.0203	1.03	0.27
	Amino Acid	Tyrosine Metabolism	tyramine	0.415004	0.008	0.18	0.62
	Cofactors and Vitamins	Tocopherol Metabolism	alpha-tocopherol	0.356227	0.0186	0.21	0.83
	Cofactors and Vitamins	Vitamin D Metabolism	vitamin D3 sulfate	0.342542	0.0031	0.48	0.3
	Xenobiotics	Bacterial/Fungal	diaminopimelate	0.339334	0.0108	0.55	0.24
	N/A	N/A	X-25010	0.312228	0.0147	0.19	0.55
	Nucleotide	Pyrimidine Metabolism, Uracil containing	uridine 5'-monophosphate (UMP)	0.201906	0.0039	0.2	0.2
	Lipid	Endocannabinoid	lignoceroyl ethanolamide (24:0)*	0.157793	0.0097	0.11	0.43
	Cofactors and Vitamins	Hemoglobin and Porphyrin Metabolism	bilirubin (Z,Z)	0.134232	0.0028	0.04	0.23
	Partially Characterized Molecules	Partially Characterized Molecules	bilirubin degradation product, C17H18N2O4 (2)**	0.118115	0.0147	0.03	0.29
	Xenobiotics	Drug - Antibiotic	3-hydroxyquinine	0.103742	0.02	0.01	0.4
	Xenobiotics	Drug - Psychoactive	trazodone	0.0633824	0.0051	0.16	0.04

## Sheet: B-Pathway Heat Map
	Extended data Table 3.b. This heatmap represents the results of the statistical analysis of the human fecal-metabolome data. For the sex-specific fold-changes light gray background indicates p<0.1, and dark gray p<0.05. Red and green shaded cells indicate p≤0.05 (red indicates that the mean values are significantly higher for that comparison; green values significantly lower). Light red and light…
	Heat map of statistically significant biochemicals profiled in this study.										Fold of Change									Statistical Values
											2W ANOVA Main Effects				2W ANOVA Contrast					2W ANOVA Main Effects						2W ANOVA Contrast									Mean Values									% Filled Values
											ALS Progression	Sex	ALS:Sex	SLOW_ALS	F_SLOW_ALS	M_SLOW_ALS	M_SLOW_ALS	M_FAST_ALS		ALS Progression		Sex		ALS:Sex		F_SLOW_ALS		M_SLOW_ALS		M_SLOW_ALS		M_FAST_ALS			FAST	FAST_FEMALE	FAST_MALE	FEMALE	MALE	SLOW	SLOW_FEMALE	SLOW_MALE		FAST	FAST_FEMALE	FAST_MALE	FEMALE	MALE	SLOW
																										F_FAST_ALS		M_FAST_ALS		F_SLOW_ALS		F_FAST_ALS
	Pathway Sort Order	Super Pathway	Sub Pathway	Biochemical Name	Platform	Comp ID	KEGG	HMDB	PUBCHEM	X				FAST_ALS	F_FAST_ALS	M_FAST_ALS	F_SLOW_ALS	F_FAST_ALS	X	p-value	q-value	p-value	q-value	p-value	q-value	p-value	q-value	p-value	q-value	p-value	q-value	p-value	q-value	X									X
	1	Amino Acid	Glycine, Serine and Threonine Metabolism	glycine	LC/MS pos early	58	C00037	HMDB0000123	750					0.953789	1.16	0.73	0.58	0.93		0.6975	0.8894	0.3013	0.8055	0.317	0.9998	0.6673	1	0.3132	0.9942	0.1087	0.8759	0.9825	1		1.4477	1.504	1.3913	1.6272	1.2012	1.3808	1.7504	1.0112		100	100	100	100	100	100
	2			N-acetylglycine	LC/MS polar	27710		HMDB0000532	10972					0.826298	0.87	0.79	1.04	1.13		0.7434	0.8932	0.9546	0.8677	0.5997	0.9998	0.8912	1	0.5356	0.9942	0.7045	0.9938	0.7108	1		2.5515	2.3905	2.7125	2.2306	2.4292	2.1083	2.0707	2.1459		100	100	100	100	100	100
	5			sarcosine	LC/MS pos early	1516	C00213	HMDB0000271	1088					0.681559	0.97	0.51	0.88	1.67		0.1804	0.8076	0.5046	0.8374	0.5823	0.9998	0.572	0.9954	0.1719	0.9942	0.9231	0.9953	0.4403	1		1.437	1.0776	1.7964	1.0598	1.3565	0.9794	1.0421	0.9167		86	75	100	63	83	69
	6			dimethylglycine	LC/MS pos early	5086	C03626	HMDB0000092	673					3.28859	5.05	0.9	0.13	0.74		0.7026	0.8894	0.1683	0.7407	0.6885	0.9998	0.5915	0.9977	0.9888	1	0.1539	0.9157	0.5197	1		1.1047	1.2707	0.9388	3.8437	0.8939	3.6329	6.4168	0.8491		100	100	100	100	100	100
	7			betaine	LC/MS pos early	3141	C00719	HMDB0000043	247					1.02307	3.67	0.35	0.38	3.94		0.6741	0.8894	0.6325	0.8374	0.0522	0.9998	0.2682	0.9708	0.0842	0.9942	0.2113	0.9315	0.1195	1		2.0287	0.8218	3.2356	1.919	2.1852	2.0755	3.0163	1.1348		86	75	100	75	75	69
	10			serine	LC/MS pos early	1648	C00065	HMDB0000187	5951					1.01109	1.16	0.86	0.71	0.96		0.9184	0.9084	0.147	0.7278	0.2426	0.9998	0.457	0.9912	0.3512	0.9942	0.0417	0.6809	0.8458	1		1.0908	1.1107	1.0709	1.2	0.9937	1.1029	1.2894	0.9164		100	100	100	100	100	100
	11			N-acetylserine	LC/MS polar	37076		HMDB0002931	65249					1.26972	1.31	1.24	1.2	1.26		0.5799	0.8754	0.7118	0.8486	0.7859	0.9998	0.5713	0.9954	0.8359	0.9984	0.9367	0.9974	0.6837	1		1.0596	0.9357	1.1835	1.0801	1.3249	1.3454	1.2245	1.4664		100	100	100	100	100	100
	16			2-methylserine	LC/MS pos early	53229	C02115		94309					0.740491	0.63	0.83	1.52	1.16		0.317	0.8076	0.3274	0.8125	0.8554	0.9998	0.4148	0.9826	0.5454	0.9942	0.348	0.9315	0.6068	1		1.3225	1.2236	1.4215	0.9996	1.3022	0.9793	0.7757	1.1829		100	100	100	88	100	92
	17			threonine	LC/MS pos early	1284	C00188	HMDB0000167	6288					1.03876	1.13	0.91	0.56	0.7		0.9718	0.9214	0.0397	0.5456	0.5945	0.9998	0.7319	1	0.6786	0.9942	0.0389	0.68	0.2965	1		1.205	1.4196	0.9904	1.5103	0.9464	1.2517	1.6011	0.9023		100	100	100	100	100	100
	18			N-acetylthreonine	LC/MS polar	33939		HMDB0062557	152204					1.80195	1.31	2.31	1.74	0.98		0.3503	0.8101	0.7766	0.8572	0.8201	0.9998	0.6223	1	0.3973	0.9942	0.6799	0.9808	0.9714	1		0.9947	1.0025	0.9869	1.1557	1.6314	1.7924	1.3089	2.2759		100	100	100	100	100	100
	19			allo-threonine	LC/MS polar	15142	C05519	HMDB0004041	99289					1.50007	2.47	0.93	0.63	1.68		0.6702	0.8872	0.8799	0.8629	0.2599	0.9998	0.2872	0.9708	0.5999	0.9942	0.3011	0.9315	0.5278	1		0.6933	0.5165	0.8701	0.8957	0.8376	1.04	1.2748	0.8052		57	50	67	63	58	62
	22			homoserine	LC/MS polar	18351	C00263	HMDB0000719	12647					1.00258	0.94	1.08	0.88	0.76		0.8986	0.9084	0.374	0.8266	0.9941	0.9998	0.9343	1	0.9217	1	0.4667	0.9315	0.5719	1		1.2772	1.4509	1.1035	1.4077	1.1499	1.2805	1.3645	1.1964		100	100	100	100	100	100
	29		Alanine and Aspartate Metabolism	alanine	LC/MS pos early	1126	C00041	HMDB0000161	5950					0.818089	0.95	0.68	0.68	0.95		0.3039	0.8076	0.398	0.8334	0.3692	0.9998	0.9255	1	0.167	0.9942	0.1665	0.9157	0.9722	1		1.476	1.513	1.439	1.4772	1.2064	1.2075	1.4413	0.9737		100	100	100	100	100	100
	31			N-acetylalanine	LC/MS polar	1585	C02847	HMDB0000766	88064					0.773353	0.35	2.07	1.97	0.33		0.6122	0.8754	0.8111	0.8616	0.126	0.9998	0.1624	0.9488	0.4356	0.9942	0.2839	0.9315	0.2546	1		1.6422	2.472	0.8124	1.6639	1.2483	1.27	0.8559	1.6842		100	100	100	100	100	100
	32			N-methylalanine	LC/MS pos early	37069	C02721	HMDB0094692	4377					0.594647	0.67	0.55	1.36	1.67		0.3455	0.8101	0.4917	0.8374	0.7327	0.9998	0.378	0.9767	0.6551	0.9942	0.4078	0.9315	0.8236	1		1.6662	1.2485	2.0839	1.0441	1.6129	0.9908	0.8397	1.1419		100	100	100	100	100	100
	33			N,N-dimethylalanine	LC/MS pos early	63151			5488191					2.60208	2.7	2.54	1.53	1.62		0.1984	0.8076	0.1469	0.7278	0.9507	0.9998	0.3488	0.9708	0.3651	0.9942	0.2545	0.9315	0.3276	1		1.1261	0.8596	1.3926	1.5886	2.4676	2.9302	2.3176	3.5427		100	100	100	100	100	100
	34			N-propionylalanine	LC/MS neg	42993		HMDB0094698	321155					1.16985	0.57	1.9	2.74	0.82		0.932	0.9105	0.2102	0.7692	0.1202	0.9998	0.3011	0.9708	0.2258	0.9942	0.0299	0.678	0.8333	1		0.7012	0.7712	0.6313	0.6047	0.9169	0.8203	0.4382	1.2024		86	100	67	50	67	46
	35			N-carbamoylalanine	LC/MS pos early	52340			426409					1.19456	0.57	2.67	2	0.42		0.5009	0.8563	0.9879	0.8766	0.0372	0.9998	0.2925	0.9708	0.0464	0.9942	0.0829	0.8515	0.1703	1		0.7787	1.0931	0.4642	0.8564	0.8525	0.9302	0.6196	1.2408		57	50	67	38	83	69
	36			aspartate	LC/MS pos early	443	C00049	HMDB0000191	5960					0.918619	0.85	0.99	1.01	0.87		0.5833	0.8754	0.6091	0.8374	0.8359	0.9998	0.6038	0.9981	0.8023	0.9984	0.8046	0.9938	0.6476	1		1.144	1.226	1.062	1.1362	1.0588	1.0509	1.0463	1.0555		100	100	100	100	100	100
	37			N-acetylaspartate (NAA)	LC/MS neg	22185	C01042	HMDB0000812	65065					2.52996	3.53	1.93	0.9	1.66		0.4497	0.841	0.4511	0.8374	0.8721	0.9998	0.5281	0.9954	0.6619	0.9942	0.6292	0.9747	0.5598	1		0.9163	0.6899	1.1428	1.5626	1.6719	2.3182	2.4353	2.201		100	100	100	100	100	100
	40			asparagine	LC/MS pos early	512	C00152	HMDB0000168	6267					0.705693	0.55	1.03	0.91	0.49		0.9949	0.9214	0.644	0.8374	0.9528	0.9998	0.9641	1	0.9693	1	0.744	0.9938	0.7398	1		3.2602	4.3907	2.1297	3.3995	2.1613	2.3007	2.4084	2.1929		100	100	100	100	100	100
	42			N-acetylasparagine	LC/MS pos early	33942		HMDB0006028	99715					1.15963	0.85	1.74	1.08	0.53		0.5064	0.86	0.6831	0.8475	0.5	0.9998	0.9943	1	0.3329	0.9942	0.8272	0.9938	0.4918	1		1.2692	1.6623	0.8761	1.5397	1.2013	1.4718	1.4171	1.5264		100	100	100	100	100	100
	46		Glutamate Metabolism	glutamate	LC/MS pos early	57	C00025 C00217	HMDB0000148	33032					0.960188	0.95	0.97	0.95	0.92		0.746	0.8946	0.8752	0.8629	0.9802	0.9998	0.8105	1	0.8272	0.9984	0.9148	0.9953	0.9079	1		1.0424	1.0854	0.9994	1.0564	0.9869	1.0009	1.0273	0.9744		100	100	100	100	100	100
	47			glutamine	LC/MS pos early	53	C00064	HMDB0000641	5961					1.08352	1.22	0.92	0.61	0.81		0.8494	0.9084	0.0921	0.6985	0.3319	0.9998	0.4241	0.9855	0.5643	0.9942	0.0383	0.68	0.6217	1		1.0836	1.1956	0.9715	1.3252	0.9324	1.1741	1.4547	0.8934		100	100	100	100	100	100
	48			alpha-ketoglutaramate*	LC/MS polar	62101	C00940	HMDB0001552	48					0.967221	0.87	1.14	0.76	0.58		0.9955	0.9214	0.1564	0.7336	0.8872	0.9998	0.9254	1	0.9144	1	0.2935	0.9315	0.3148	1		1.0525	1.3321	0.773	1.2442	0.8262	1.018	1.1564	0.8795		100	100	100	100	92	92
	49			N-acetylglutamate	LC/MS pos early	15720	C00624	HMDB0001138	70914					1.35535	2.43	0.91	0.9	2.41		0.0801	0.8076	0.0611	0.6384	0.0214	0.9998	0.0079	0.6867	0.6267	0.9942	0.6711	0.9808	0.0104	1		0.8507	0.4989	1.2024	0.8568	1.1469	1.153	1.2146	1.0913		86	75	100	88	100	100
	50			N-acetylglutamine	LC/MS pos early	33943	C02716	HMDB0006029	182230					1.25712	1.53	1.01	0.72	1.09		0.2293	0.8076	0.7119	0.8486	0.2323	0.9998	0.1062	0.9488	0.9952	1	0.2094	0.9315	0.5895	1		0.9521	0.9107	0.9935	1.1518	0.9972	1.1969	1.3928	1.0009		100	100	100	100	100	100
	51			N-methylglutamate	LC/MS pos early	31532	C01046	HMDB0062660	439377					1.41365	1.57	1.32	1.32	1.57		0.198	0.8076	0.1009	0.6985	0.9228	0.9998	0.4051	0.9826	0.309	0.9942	0.1563	0.9157	0.3115	1		0.7192	0.5605	0.8779	0.719	1.0169	1.0167	0.8775	1.1559		86	100	67	100	92	100
	53			4-hydroxyglutamate	LC/MS pos early	40499	C03079	HMDB0001344	439902					1.13968	1.18	1.11	1.21	1.3		0.8398	0.9084	0.4265	0.8374	0.9757	0.9998	0.8729	1	0.9004	0.9991	0.5346	0.9484	0.5974	1		0.7374	0.6424	0.8324	0.7015	0.8763	0.8404	0.7606	0.9202		57	50	67	50	92	85
	56			glutamate, gamma-methyl ester	LC/MS pos early	33487		HMDB0061715	68662					1.6324	1.73	1.51	0.68	0.78		0.299	0.8076	0.6045	0.8374	0.7386	0.9998	0.346	0.9708	0.6001	0.9942	0.4929	0.9385	0.9059	1		0.8384	0.9417	0.7351	1.2837	0.9234	1.3686	1.6257	1.1116		100	100	100	100	100	100
	57			N-acetyl-aspartyl-glutamate (NAAG)	LC/MS neg	35665	C12270	HMDB0001067	188803					0.963482	0.85	1.08	1.23	0.96		0.7949	0.9071	0.9448	0.8674	0.8243	0.9998	0.7407	1	0.9778	1	0.9016	0.9953	0.853	1		0.8133	0.8296	0.7969	0.7661	0.8308	0.7836	0.7026	0.8646		43	50	33	50	58	62
	60			carboxyethyl-GABA	LC/MS pos early	40007		HMDB0002201	2572					1.4258	2.3	1.16	1.63	3.24		0.2385	0.8076	0.0125	0.4823	0.3427	0.9998	0.1497	0.9488	0.8597	0.9984	0.1577	0.9157	0.0283	1		0.7642	0.3605	1.1679	0.595	1.2587	1.0896	0.8296	1.3495		100	100	100	100	100	100
	61			N-methyl-GABA	LC/MS pos early	39577	C15987		70703					0.438536	0.74	0.36	1.78	3.69		0.5399	0.8694	0.416	0.8374	0.9031	0.9998	0.6132	0.9983	0.7189	0.9976	0.4495	0.9315	0.657	1		2.0443	0.8725	3.2161	0.7585	2.1823	0.8965	0.6445	1.1486		71	75	67	63	83	77
	62			2-pyrrolidinone	LC/MS pos early	31675		HMDB0002039	12025					1.02363	0.79	1.37	1.14	0.66		0.8912	0.9084	0.6479	0.8374	0.3976	0.9998	0.6227	1	0.4731	0.9942	0.7483	0.9938	0.4083	1		1.0157	1.2233	0.8082	1.0968	0.9587	1.0397	0.9702	1.1092		100	100	100	88	100	92
	64			S-1-pyrroline-5-carboxylate	LC/MS pos early	42370	C04322	HMDB0001301	11966181					0.38787	0.24	0.65	1.56	0.57		0.029	0.7678	0.6084	0.8374	0.1602	0.9998	0.0171	0.7017	0.5094	0.9942	0.4535	0.9315	0.2224	1		1.2762	1.6212	0.9313	1.0038	0.7675	0.495	0.3864	0.6036		86	100	67	63	67	54
	66			propionylglutamine	LC/MS pos early	54909								0.763349	0.74	0.78	1.56	1.46		0.615	0.8754	0.4427	0.8374	0.9008	0.9998	0.7941	1	0.6473	0.9942	0.6007	0.9613	0.5691	1		1.2829	1.0414	1.5245	0.9034	1.3588	0.9793	0.7655	1.1931		100	100	100	100	92	92
	67			butyrylglutamine/isobutyrylglutamine	LC/MS neg	54934								1.40987	1.41	1.41	0.96	0.96		0.518	0.8612	0.906	0.8629	0.8987	0.9998	0.5945	0.9981	0.7035	0.9942	0.9941	1	0.8759	1		0.9042	0.9204	0.888	1.1108	1.0682	1.2748	1.3013	1.2484		100	100	100	100	83	85
	72		Histidine Metabolism	histidine	LC/MS neg	59	C00135	HMDB0000177	6274					1.5126	1.65	1.39	0.9	1.07		0.1981	0.8076	0.7316	0.8527	0.475	0.9998	0.1732	0.9488	0.662	0.9942	0.3951	0.9315	0.8108	1		0.8968	0.8655	0.9281	1.1454	1.1079	1.3565	1.4253	1.2876		100	100	100	100	100	100
	74			3-methylhistidine	LC/MS pos early	15677	C01152	HMDB0000479	64969					2.07732	0.82	2.75	6.26	1.87		0.1293	0.8076	0.0671	0.6556	0.9938	0.9998	0.2903	0.9708	0.2585	0.9942	0.1304	0.9088	0.2312	1		1.2416	0.8659	1.6173	0.7885	3.0323	2.5792	0.711	4.4474		86	75	100	88	100	100
	75			N-acetylhistidine	LC/MS pos early	33946	C02997	HMDB0032055	75619					1.53967	1.31	1.74	1.48	1.11		0.4589	0.8452	0.866	0.8629	0.9651	0.9998	0.6301	1	0.5663	0.9942	0.8636	0.9938	0.9366	1		1.0297	0.974	1.0854	1.1267	1.4885	1.5854	1.2794	1.8915		100	100	100	100	100	100
	77			N-acetyl-3-methylhistidine*	LC/MS pos early	43256		HMDB0240341	193270					1.23262	0.96	1.28	7.61	5.71		0.8723	0.9084	0.0909	0.6985	0.8192	0.9998	0.9627	1	0.7767	0.9984	0.12	0.8928	0.3338	1		0.3899	0.1163	0.6635	0.114	0.7565	0.4806	0.1117	0.8496		29	25	33	25	42	38
	79			hydantoin-5-propionate	LC/MS polar	40473	C05565	HMDB0001212	782					1.02024	0.96	1.09	1.05	0.92		0.9101	0.9084	0.9505	0.8674	0.9752	0.9998	0.9212	1	0.9524	1	0.9399	0.9974	0.9843	1		1.0229	1.0636	0.9823	1.0418	1.0248	1.0436	1.02	1.0672		100	100	100	88	100	92
	80			trans-urocanate	LC/MS pos early	607	C00785	HMDB0000301	736715					0.89176	1.43	0.56	0.64	1.63		0.3889	0.8361	0.782	0.8572	0.1031	0.9998	0.5706	0.9954	0.0749	0.9942	0.2591	0.9315	0.2192	1		1.25	0.9519	1.5482	1.1566	1.2082	1.1147	1.3612	0.8682		100	100	100	100	100	100
	81			cis-urocanate	LC/MS pos early	40410		HMDB0034174	1549103					0.745289	1.05	0.56	0.85	1.6		0.1842	0.8076	0.57	0.8374	0.1475	0.9998	0.9276	1	0.0499	0.9942	0.4572	0.9315	0.1998	1		1.4381	1.1074	1.7688	1.1327	1.3772	1.0718	1.158	0.9855		100	100	100	100	100	100
	82			imidazole propionate	LC/MS pos early	40730		HMDB0002271	70630					2.47435	1.51	5.35	1.18	0.33		0.4387	0.839	0.4209	0.8374	0.6692	0.9998	0.8083	1	0.3834	0.9942	0.7561	0.9938	0.4341	1		0.8831	1.3242	0.4421	1.6639	1.4044	2.1851	2.0035	2.3666		100	100	100	100	100	100
	83			formiminoglutamate	LC/MS pos early	43493	C00439	HMDB0000854	439233					0.331545	0.31	0.36	0.98	0.85		0.1547	0.8076	0.7327	0.8527	0.4184	0.9998	0.6547	1	0.1096	0.9942	0.7012	0.9935	0.4644	1		4.2133	4.5469	3.8798	2.9804	2.6298	1.3969	1.4138	1.3799		100	100	100	100	100	100
	85			imidazole lactate	LC/MS pos early	15716	C05568	HMDB0002320	793					1.35371	0.91	1.89	1.74	0.84		0.6326	0.8754	0.9306	0.8667	0.6276	0.9998	0.9961	1	0.4844	0.9942	0.6436	0.9784	0.7994	1		1.0011	1.0907	0.9116	1.0403	1.316	1.3552	0.99	1.7204		100	100	100	100	100	100
	89			anserine	LC/MS pos early	15747	C01262	HMDB0000194	112072					1.36801	0.58	2.61	2.83	0.63		0.4914	0.8549	0.7981	0.861	0.3526	0.9998	0.8641	1	0.2434	0.9942	0.3395	0.9315	0.6632	1		1.3524	1.6554	1.0493	1.3108	1.8916	1.8501	0.9662	2.7339		100	100	100	100	100	100
	90			histamine	LC/MS pos early	1574	C00388	HMDB0000870	774					1.07792	0.53	2.34	1.95	0.44		0.9064	0.9084	0.7543	0.8528	0.2001	0.9998	0.4153	0.9826	0.3044	0.9942	0.4225	0.9315	0.3081	1		0.7482	1.0395	0.4568	0.7928	0.7619	0.8065	0.546	1.0671		29	50	0	38	33	38
	94			1-methyl-5-imidazoleacetate	LC/MS pos early	62946		HMDB04988	6451814					1.43216	2.03	1.15	1.18	2.1		0.4166	0.8361	0.1401	0.7221	0.6605	0.9998	0.3916	0.9802	0.7819	0.9984	0.3849	0.9315	0.2214	1		0.7157	0.462	0.9694	0.7006	1.0401	1.025	0.9392	1.1108		100	100	100	100	100	100
	95			1-methyl-5-imidazolelactate	LC/MS pos early	64596								3.09684	0.84	3.82	14.11	3.1		0.5893	0.8754	0.0626	0.6384	0.5099	0.9998	0.9336	1	0.3852	0.9942	0.046	0.6942	0.411	1		1.2278	0.5984	1.8572	0.5509	4.4793	3.8023	0.5034	7.1013		86	75	100	88	100	100
	99			4-imidazoleacetate	LC/MS pos early	32349	C02835	HMDB0002024	96215					1.09827	0.72	1.94	1.2	0.45		0.8623	0.9084	0.3341	0.8125	0.5741	0.9998	0.7883	1	0.5922	0.9942	0.7372	0.9938	0.3328	1		1.1886	1.6442	0.733	1.4159	1.0781	1.3054	1.1876	1.4232		100	100	100	100	100	100
	103			N-acetylhistamine	LC/MS pos early	48679	C05135	HMDB0013253	69602					1.61375	1.05	2.58	1.44	0.59		0.717	0.8894	0.4373	0.8374	0.4391	0.9998	0.4361	0.9897	0.7609	0.9984	0.998	1	0.3267	1		0.6343	0.8002	0.4683	0.8197	0.8381	1.0236	0.8392	1.2079		86	100	67	75	58	54
	107		Lysine Metabolism	lysine	LC/MS pos early	1301	C00047 C00739	HMDB0003405	5962					0.956587	1	0.91	0.77	0.85		0.512	0.8612	0.3941	0.8317	0.7211	0.9998	0.8354	1	0.462	0.9942	0.3313	0.9315	0.7486	1		1.0596	1.1478	0.9713	1.1466	0.9265	1.0136	1.1454	0.8817		100	100	100	100	100	100
	108			N2-acetyllysine	LC/MS polar	36751	C12989	HMDB0000446	92907					1.39768	1.49	1.31	0.9	1.02		0.6007	0.8754	0.8854	0.8629	0.6273	0.9998	0.4897	0.9912	0.9777	1	0.611	0.9639	0.8273	1		1.0013	0.989	1.0136	1.2298	1.171	1.3995	1.4705	1.3284		100	100	100	100	100	100
	109			N6-acetyllysine	LC/MS polar	36752	C02727	HMDB0000206	92832					1.06673	0.85	1.43	1.02	0.6		0.9803	0.9214	0.402	0.8374	0.211	0.9998	0.3929	0.9802	0.3475	0.9942	0.7254	0.9938	0.1876	1		0.9801	1.2231	0.737	1.1296	0.896	1.0455	1.036	1.055		100	100	100	100	100	100
	111			N2-acetyl,N6-methyllysine	LC/MS pos early	62954								2.88096	2.09	3.87	1.48	0.8		0.1115	0.8076	0.9827	0.8763	0.6732	0.9998	0.4013	0.9826	0.1429	0.9942	0.746	0.9938	0.7775	1		0.415	0.4604	0.3695	0.7116	0.899	1.1956	0.9627	1.4286		29	50	0	50	50	62
	114			N6-formyllysine	LC/MS pos early	17895			70923					1.29919	1.04	1.78	0.92	0.54		0.7992	0.9084	0.574	0.8374	0.268	0.9998	0.5499	0.9954	0.3207	0.9942	0.649	0.9784	0.2896	1		1.2701	1.6518	0.8884	1.6847	1.2355	1.6501	1.7176	1.5826		100	100	100	100	100	100
	115			N6-carboxyethyllysine	LC/MS polar	37458			23400779					1.58771	0.81	3.24	1.88	0.47		0.5319	0.8664	0.6924	0.8476	0.4012	0.9998	0.8798	1	0.2901	0.9942	0.7151	0.9938	0.4326	1		1.1475	1.5613	0.7338	1.4126	1.5568	1.8219	1.264	2.3797		100	100	100	88	100	92
	116			N6-methyllysine	LC/MS pos early	62860	C02728	HMDB0002038	164795					1.919	1.3	2.59	1.85	0.92		0.3999	0.8361	0.6638	0.8449	0.6989	0.9998	0.7503	1	0.3725	0.9942	0.5084	0.9438	0.9755	1		0.6284	0.6532	0.6035	0.7503	1.0839	1.2059	0.8475	1.5643		100	100	100	88	92	85
	117			N6,N6-dimethyllysine	LC/MS pos early	62862	C05545	HMDB0013287	193344					1.45312	0.67	2.97	2.32	0.52		0.8987	0.9084	0.9074	0.8629	0.2884	0.9998	0.4114	0.9826	0.4903	0.9942	0.34	0.9315	0.5418	1		1.0772	1.419	0.7355	1.1814	1.4611	1.5653	0.9438	2.1867		100	100	100	75	83	69
	118			N6,N6,N6-trimethyllysine	LC/MS pos early	1498	C03793	HMDB0001325	440120					0.296989	1.84	0.2	1.84	16.62		0.7293	0.8894	0.2098	0.7692	0.4258	0.9998	0.7534	1	0.4066	0.9942	0.6976	0.9935	0.1954	1		5.4076	0.6138	10.2014	0.873	6.1406	1.606	1.1322	2.0798		100	100	100	100	92	92
	119			hydroxy-N6,N6,N6-trimethyllysine*	LC/MS pos early	62959								1.2714	0.71	3.41	1.25	0.26		0.4123	0.8361	0.2315	0.7692	0.0544	0.9998	0.4089	0.9826	0.0493	0.9942	0.5105	0.9438	0.0508	1		0.6728	1.0667	0.2788	0.914	0.6142	0.8554	0.7613	0.9496		43	75	0	63	67	77
	120			N-butyryl-lysine	LC/MS pos early	64569			13072316					1.06619	0.7	1.85	1.22	0.46		0.9375	0.9139	0.4748	0.8374	0.4689	0.9998	0.5802	0.9954	0.6358	0.9942	0.9937	1	0.3623	1		1.3431	1.8339	0.8524	1.5619	1.2132	1.432	1.29	1.574		100	100	100	100	100	100
	121			5-hydroxylysine	LC/MS pos early	15685	C16741	HMDB0000450	3032849					0.788652	3.04	0.48	1.16	7.33		0.8552	0.9084	0.1994	0.7637	0.2838	0.9998	0.3869	0.9773	0.5105	0.9942	0.8549	0.9938	0.139	1		2.4675	0.5924	4.3427	1.1975	3.216	1.946	1.8027	2.0893		86	75	100	75	83	77
	123			fructosyllysine	LC/MS pos early	46227		HMDB0034879	9839580					1.40913	1.33	1.47	1.47	1.33		0.9877	0.9214	0.8388	0.8624	0.8483	0.9998	0.9038	1	0.8802	0.9991	0.7498	0.9938	0.9938	1		1.0229	0.8772	1.1685	1.0212	1.4431	1.4414	1.1651	1.7176		100	100	100	100	100	100
	124			saccharopine	LC/MS pos early	1495	C00449	HMDB0000279	160556					9.8957	16.38	3.6	0.23	1.03		0.1745	0.8076	0.7905	0.861	0.6427	0.9998	0.2116	0.9543	0.4994	0.9942	0.5564	0.9547	0.899	1		0.4372	0.4306	0.4438	3.7427	1.0209	4.3264	7.0547	1.5981		43	25	67	38	67	62
	125			2-aminoadipate	LC/MS polar	6146	C00956	HMDB0000510	92136					0.886258	0.18	4.05	4.88	0.22		0.721	0.8894	0.8504	0.8629	0.1393	0.9998	0.2057	0.9488	0.3976	0.9942	0.2862	0.9315	0.2826	1		2.4626	4.0316	0.8936	2.3868	2.2584	2.1825	0.742	3.6231		57	75	33	88	58	77
	133			pipecolate	LC/MS pos early	1444		HMDB0000070						1.9339	0.84	3.75	2.68	0.6		0.4144	0.8361	0.3414	0.8125	0.6471	0.9998	0.8018	1	0.3559	0.9942	0.2591	0.9315	0.7479	1		0.9501	1.1866	0.7136	1.0928	1.6948	1.8374	0.9989	2.6759		100	100	100	100	100	100
	135			6-oxopiperidine-2-carboxylate	LC/MS neg	43231		HMDB0061705	3014237					1.36991	1.34	1.41	0.71	0.68		0.3068	0.8076	0.3227	0.8125	0.8181	0.9998	0.5801	0.9954	0.3613	0.9942	0.5338	0.9484	0.4366	1		0.8848	1.0527	0.7169	1.234	0.863	1.2121	1.4152	1.009		86	75	100	88	100	100
	136			cadaverine	LC/MS pos early	15308	C01672	HMDB0002322	273					0.253121	0.01	1.85	21.1	0.15		0.5171	0.8612	0.2605	0.7779	0.5375	0.9998	0.3876	0.9773	0.9815	1	0.1656	0.9157	0.7374	1		2.3791	4.1384	0.6199	2.0964	0.8849	0.6022	0.0545	1.1499		43	25	67	25	67	54
	137			N-acetyl-cadaverine	LC/MS pos early	43530		HMDB0002284	10374713					0.347935	0.09	0.43	15.38	3.04		0.274	0.8076	0.9504	0.8674	0.2258	0.9998	0.1196	0.9488	0.9273	1	0.3006	0.9315	0.4575	1		9.3782	4.6443	14.1121	2.5214	10.1198	3.263	0.3985	6.1275		100	100	100	100	100	100
	138			5-aminovalerate	LC/MS pos early	18319	C00431	HMDB0003355	138					1.42384	0.97	1.71	2.76	1.56		0.9708	0.9214	0.4239	0.8374	0.8872	0.9998	0.9024	1	0.9388	1	0.592	0.9599	0.548	1		1.2762	0.9965	1.5559	0.9811	2.1121	1.8171	0.9658	2.6683		100	100	100	100	100	100
	139			N,N-dimethyl-5-aminovalerate	LC/MS pos early	62819								0.273091	0.24	0.29	1.92	1.59		0.1966	0.8076	0.4438	0.8374	0.8889	0.9998	0.3213	0.9708	0.3926	0.9942	0.4643	0.9315	0.6878	1		3.7222	2.8756	4.5687	1.7862	2.9524	1.0165	0.6968	1.3361		100	100	100	100	92	92
	140			N,N,N-trimethyl-5-aminovalerate	LC/MS pos early	57687			14274897					1.40415	1.18	1.6	1.56	1.15		0.9771	0.9214	0.7365	0.8527	0.9737	0.9998	0.9977	1	0.9642	1	0.7651	0.9938	0.8466	1		0.7658	0.7122	0.8194	0.7768	1.0643	1.0753	0.8414	1.3092		100	100	100	100	100	100
	141			N-acetyl-2-aminoadipate	LC/MS pos early	63920	C12986		443992					0.778658	0.75	0.82	0.9	0.82		0.216	0.8076	0.71	0.8486	0.9035	0.9998	0.3466	0.9708	0.4083	0.9942	0.839	0.9938	0.7537	1		1.4141	1.5508	1.2775	1.3557	1.1595	1.1011	1.1606	1.0416		100	100	100	100	100	100
	142		Phenylalanine Metabolism	phenylalanine	LC/MS pos early	64	C00079	HMDB0000159	6140					0.989979	1.04	0.93	0.85	0.95		0.6896	0.8894	0.4838	0.8374	0.6441	0.9998	0.9654	1	0.5314	0.9942	0.3511	0.9315	0.8776	1		1.0877	1.1142	1.0611	1.1381	1.0263	1.0768	1.162	0.9915		100	100	100	100	100	100
	144			N-acetylphenylalanine	LC/MS neg	33950	C03519	HMDB0000512	74839					1.72128	1.04	2.94	1.58	0.56		0.9024	0.9084	0.8083	0.8616	0.3803	0.9998	0.4905	0.9912	0.5787	0.9942	0.6033	0.9613	0.4754	1		1.1736	1.5056	0.8416	1.5361	1.6576	2.0201	1.5666	2.4736		100	100	100	100	100	100
	147			N-succinyl-phenylalanine	LC/MS neg	63855			3131586					8.6155	1.51	15.72	10.43	1		0.4404	0.839	0.7677	0.8572	0.7677	0.9998	0.7403	1	0.4379	0.9942	0.6336	0.9772	1	1		0.7524	0.7524	0.7524	0.9431	6.2915	6.4823	1.1339	11.8306		0	0	0	13	42	46
	148			N-butyryl-phenylalanine	LC/MS neg	63406								2.38293	1.37	3.93	1.89	0.66		0.9891	0.9214	0.9757	0.876	0.9342	0.9998	0.9473	1	0.9599	1	0.9272	0.9953	0.9735	1		1.6883	2.0369	1.3397	2.4119	3.2994	4.0231	2.787	5.2592		100	100	100	100	100	100
	149			N-isobutyryl-phenylalanine	LC/MS neg	63412			11118012					1.34885	0.75	2.02	2.38	0.89		0.8685	0.9084	0.9813	0.8763	0.8177	0.9998	0.7856	1	0.9622	1	0.867	0.9938	0.8716	1		0.8187	0.8661	0.7713	0.7593	1.1637	1.1043	0.6525	1.5561		43	50	33	63	33	46
	153			N-methylphenylalanine	LC/MS pos early	42999		HMDB0029224	6951135					6.27899	5.44	6.82	1.94	1.54		0.0136	0.7678	0.4286	0.8374	0.7454	0.9998	0.1127	0.9488	0.038	0.9942	0.3693	0.9315	0.7632	1		0.2527	0.1988	0.3066	0.6399	1.1995	1.5867	1.0809	2.0924		43	50	33	63	75	85
	155			phenylpyruvate	LC/MS polar	566	C00166	HMDB0000205	997					0.625038	0.64	0.6	0.54	0.57		0.2761	0.8076	0.2667	0.7845	0.9756	0.9998	0.4621	0.9912	0.4108	0.9942	0.3534	0.9315	0.4864	1		1.9578	2.4972	1.4185	2.0442	1.1373	1.2237	1.5913	0.8562		100	100	100	100	75	77
	156			phenyllactate (PLA)	LC/MS neg	22130	C05607	HMDB0000779 HMDB0000563	3848					0.720105	1.35	0.4	0.57	1.93		0.9002	0.9084	0.8245	0.8616	0.3891	0.9998	0.6097	0.9981	0.4711	0.9942	0.3824	0.9315	0.6802	1		4.3477	2.9707	5.7247	3.4847	3.9938	3.1308	3.9986	2.263		86	75	100	88	100	100
	159			phenethylamine	LC/MS pos early	12142	C05332	HMDB0012275	1001					1.4987	1.02	1.74	3.32	1.95		0.8142	0.9084	0.0698	0.6604	0.6441	0.9998	0.8754	1	0.612	0.9942	0.0687	0.8295	0.3629	1		1.1576	0.7845	1.5307	0.7935	2.099	1.7349	0.8025	2.6673		100	100	100	75	100	85
	160			phenylacetate	LC/MS neg	57745	C07086	HMDB0000209	999					0.782872	0.65	0.98	0.99	0.66		0.1755	0.8076	0.6391	0.8374	0.2702	0.9998	0.0977	0.9488	0.8435	0.9984	0.5986	0.9613	0.318	1		1.2389	1.4961	0.9818	1.2364	0.9724	0.9699	0.9767	0.963		100	100	100	100	100	100
	161			2-hydroxyphenylacetate	LC/MS polar	1432	C05852	HMDB0000669	11970					1.5483	1.88	1.16	0.53	0.86		0.6245	0.8754	0.5545	0.8374	0.479	0.9998	0.4127	0.9826	0.8714	0.9984	0.2986	0.9315	0.9395	1		1.1966	1.2873	1.1059	1.8547	1.1945	1.8527	2.4222	1.2832		100	100	100	100	92	92
	163			3-hydroxyphenylacetate	LC/MS polar	1413	C05593	HMDB0000440	12122					3.88843	5.81	3.27	1.77	3.14		0.1803	0.8076	0.179	0.7446	0.8014	0.9998	0.2717	0.9708	0.4161	0.9942	0.3663	0.9315	0.3062	1		0.3666	0.1773	0.5559	0.604	1.1881	1.4255	1.0306	1.8203		57	25	100	38	92	77
	164			4-hydroxyphenylacetate	LC/MS neg	541	C00642	HMDB0000020	127					0.955535	1.27	0.82	1.49	2.32		0.8185	0.9084	0.2454	0.7692	0.4599	0.9998	0.7235	1	0.4808	0.9942	0.7215	0.9938	0.2296	1		1.5383	0.9266	2.1501	1.0539	1.9543	1.4699	1.1812	1.7586		100	100	100	100	92	92
	165			valerylphenylalanine	LC/MS neg	44577		HMDB0094646	13890535					0.989908	0.6	1.56	1.8	0.68		0.5591	0.8754	0.9452	0.8674	0.9717	0.9998	0.7052	1	0.6509	0.9942	0.9786	1	0.9471	1		1.8925	2.2464	1.5387	1.7927	1.9733	1.8734	1.3389	2.4079		86	75	100	75	92	85
	167		Tyrosine Metabolism	tyrosine	LC/MS pos early	1299	C00082	HMDB0000158	6057					0.953135	0.97	0.93	0.85	0.89		0.5902	0.8754	0.4146	0.8374	0.8058	0.9998	0.8395	1	0.5682	0.9942	0.3922	0.9315	0.7134	1		0.9794	1.0371	0.9217	1.0223	0.8907	0.9335	1.0075	0.8596		100	100	100	100	100	100
	168			N-acetyltyrosine	LC/MS neg	32390		HMDB0000866	68310					1.26523	1.06	1.59	0.91	0.61		0.4601	0.8452	0.5157	0.8374	0.5184	0.9998	0.9479	1	0.317	0.9942	0.9972	1	0.4116	1		1.0602	1.3186	0.8019	1.3614	1.0403	1.3414	1.4041	1.2787		100	100	100	100	100	100
	175			tyramine	LC/MS pos early	1603	C00483	HMDB0000306	5610					0.415004	0.18	0.62	4.04	1.15		0.008	0.7598	0.1945	0.7635	0.3229	0.9998	0.0133	0.6867	0.1627	0.9942	0.0729	0.8295	0.8344	1		2.0995	1.9556	2.2435	1.1506	1.8202	0.8713	0.3456	1.3969		100	100	100	100	100	100
	177			m-tyramine	LC/MS pos early	39581		HMDB0004989	11492					1.83769	2.46	1.64	2.07	3.11		0.9961	0.9214	0.4916	0.8374	0.4821	0.9998	0.63	1	0.6047	0.9942	0.9901	1	0.3785	1		1.1885	0.5781	1.7988	1.0003	2.3723	2.1841	1.4224	2.9458		86	75	100	75	67	62
	180			4-hydroxyphenylpyruvate	LC/MS neg	1669	C01179	HMDB0000707	979					0.723332	0.8	0.66	0.94	1.15		0.3977	0.8361	0.8688	0.8629	0.8423	0.9998	0.653	1	0.4463	0.9942	0.9781	1	0.8169	1		0.8512	0.7913	0.9112	0.7128	0.7542	0.6157	0.6343	0.5971		86	100	67	88	67	69
	181			tyrosol	LC/MS neg	41515	C06044	HMDB0004284	10393					0.852252	0.59	1.08	2.11	1.15		0.6013	0.8754	0.4266	0.8374	0.3586	0.9998	0.3248	0.9708	0.7677	0.9984	0.1737	0.9254	0.9353	1		1.11	1.0348	1.1852	0.8219	1.2342	0.946	0.6089	1.2831		86	100	67	88	92	92
	186			3-(4-hydroxyphenyl)lactate	LC/MS neg	32197	C03672	HMDB0000755	9378					0.781441	1.45	0.42	0.55	1.88		0.9612	0.9214	0.7244	0.8519	0.3534	0.9998	0.5422	0.9954	0.4744	0.9942	0.3036	0.9315	0.7092	1		3.0692	2.1304	4.0079	2.6132	2.8543	2.3984	3.096	1.7007		100	100	100	100	100	100
	195			phenol sulfate	LC/MS neg	32553	C02180	HMDB0060015	74426					2.23155	1	3.46	3.46	1		0.4614	0.8452	0.4614	0.8374	0.4614	0.9998	1	1	0.2876	0.9942	0.24	0.9315	1	1		0.3334	0.3334	0.3334	0.3334	0.744	0.744	0.3334	1.1546		14	0	33	0	33	23
	200			dopamine	LC/MS pos early	12130	C03758	HMDB0000073	681					1.78087	1.12	2.68	1.75	0.73		0.3816	0.8361	0.9083	0.8629	0.9068	0.9998	0.599	0.9981	0.4685	0.9942	0.9987	1	0.8825	1		0.7913	0.914	0.6686	0.9704	1.2302	1.4092	1.0267	1.7917		100	100	100	100	92	92
	206			vanillactate	LC/MS neg	54910		HMDB0000913	160637					1.38587	0.73	2.28	2.28	0.73		0.7284	0.8894	0.7349	0.8527	0.2008	0.9998	0.5099	0.9912	0.2365	0.9942	0.1935	0.9315	0.5378	1		0.6808	0.7872	0.5745	0.6815	0.9428	0.9435	0.5759	1.3111		43	75	0	50	33	38
	212			3,4-dihydroxyphenylacetate	LC/MS neg	18296	C01161	HMDB0001336	98153					18.139	31.33	5.46	0.18	1.04		0.0209	0.7678	0.2374	0.7692	0.2045	0.9998	0.0168	0.7017	0.3796	0.9942	0.0558	0.7632	0.9524	1		0.3345	0.3279	0.3411	5.2998	1.1022	6.0675	10.2716	1.8633		43	50	33	75	50	69
	220			(R)-salsolinol	LC/MS pos early	38665	C09642	HMDB0005199	54456					2.12562	3.53	1.46	0.88	2.12		0.3559	0.8131	0.495	0.8374	0.7013	0.9998	0.3704	0.9721	0.6885	0.9942	0.8066	0.9938	0.4984	1		0.8717	0.5586	1.1847	1.2662	1.4583	1.8529	1.9738	1.7319		43	25	67	38	67	62
	221			o-tyrosine	LC/MS pos early	43392		HMDB0006050	91482					0.751138	0.7	0.8	1.37	1.2		0.3063	0.8076	0.5984	0.8374	0.6791	0.9998	0.6681	1	0.2973	0.9942	0.9265	0.9953	0.5505	1		1.0548	0.961	1.1487	0.8153	1.0318	0.7923	0.6697	0.9148		86	75	100	75	83	77
	224			gentisate	LC/MS neg	18280	C00628	HMDB0000152	3469					3.29753	4.73	2.96	2.67	4.26		0.3433	0.8101	0.5165	0.8374	0.374	0.9998	0.2121	0.9543	0.9644	1	0.8417	0.9938	0.3304	1		0.5902	0.2245	0.9559	0.6429	1.8934	1.9462	1.0614	2.8309		71	75	67	75	67	69
	231			tyramine O-sulfate	LC/MS neg	48408		HMDB0006409	153005					2.0131	4.64	1.19	0.82	3.19		0.5694	0.8754	0.6433	0.8374	0.5983	0.9998	0.4534	0.9912	0.9751	1	0.9584	1	0.5298	1		0.6261	0.2987	0.9536	0.8416	1.045	1.2604	1.3845	1.1364		43	25	67	50	58	62
	232			N-formylphenylalanine	LC/MS neg	48433		HMDB0240317	7064571;759256					1.1947	0.97	1.61	0.88	0.54		0.6308	0.8754	0.2132	0.7692	0.4803	0.9998	0.875	1	0.3898	0.9942	0.6489	0.9784	0.2172	1		1.076	1.4016	0.7504	1.3835	0.978	1.2855	1.3654	1.2056		100	100	100	100	100	100
	238			isovalerylphenylalanine	LC/MS neg	52829								0.891835	0.63	1.29	1.38	0.67		0.9217	0.9084	0.586	0.8374	0.8483	0.9998	0.8423	1	0.946	1	0.7739	0.9938	0.6396	1		1.1464	1.3717	0.9211	1.1163	1.0525	1.0224	0.8609	1.1839		57	50	67	63	50	54
	259		Tryptophan Metabolism	tryptophan	LC/MS pos early	54	C00078	HMDB0000929	6305					1.00861	1.07	0.94	0.75	0.85		0.7571	0.8961	0.2571	0.7752	0.7183	0.9998	0.9717	1	0.626	0.9942	0.2303	0.9315	0.6142	1		1.0799	1.1681	0.9918	1.2061	0.9629	1.0892	1.2442	0.9341		100	100	100	100	100	100
	268			oxindolylalanine	LC/MS pos early	64568			20977764					1.08521	0.78	1.55	1.28	0.65		0.6802	0.8894	0.4776	0.8374	0.5805	0.9998	0.5086	0.9912	0.9176	1	0.8967	0.9953	0.4234	1		1.17	1.4215	0.9184	1.2675	1.1722	1.2697	1.1134	1.4261		100	100	100	100	92	92
	269			tryptophan betaine	LC/MS pos early	37097	C09213	HMDB0061115	442106					6.00766	1	11.02	11.02	1		0.1567	0.8076	0.1567	0.7336	0.1567	0.9998	1	1	0.0457	0.9942	0.0287	0.6703	1	1		0.0653	0.0653	0.0653	0.0653	0.3923	0.3923	0.0653	0.7193		14	25	0	13	42	38
	272			kynurenine	LC/MS pos early	15140	C00328	HMDB0000684	161166					1.01821	0.85	1.26	1.08	0.73		0.6917	0.8894	0.6432	0.8374	0.5534	0.9998	0.4979	0.9912	0.885	0.9991	0.9155	0.9953	0.5028	1		1.1365	1.316	0.9569	1.2145	1.0791	1.1572	1.113	1.2013		100	100	100	100	92	92
	277			kynurenate	LC/MS neg	1417	C01717	HMDB0000715	3845					0.676325	0.58	0.83	0.86	0.6		0.6005	0.8754	0.9633	0.8698	0.7601	0.9998	0.8798	1	0.5467	0.9942	0.7763	0.9938	0.8688	1		2.2501	2.8059	1.6943	2.2204	1.5514	1.5218	1.635	1.4085		71	75	67	88	92	100
	279			N-formylanthranilic acid	LC/MS neg	43549	C05653	HMDB0004089	101399					0.787921	0.65	0.93	1.39	0.98		0.3241	0.8076	0.6319	0.8374	0.7186	0.9998	0.3557	0.9708	0.6418	0.9942	0.4991	0.9409	0.9393	1		0.9968	1.0086	0.985	0.8331	0.9492	0.7854	0.6576	0.9133		86	75	100	75	92	85
	280			anthranilate	LC/MS pos early	4970	C00108	HMDB0001123	227					0.526411	0.33	1.14	1.14	0.33		0.0248	0.7678	0.0248	0.525	0.0068	0.9998	0.0015	0.6867	0.6547	0.9942	0.62	0.9682	0.0027	0.7221		0.9996	1.5068	0.4924	0.9996	0.5262	0.5262	0.4924	0.56		43	75	0	50	17	23
	283			xanthurenate	LC/MS neg	15679	C02470	HMDB0000881	5699					0.771617	1.53	0.4	0.55	2.06		0.7752	0.9043	0.8967	0.8629	0.4329	0.9998	0.7286	1	0.4365	0.9942	0.5941	0.961	0.5597	1		0.8512	0.5556	1.1467	0.7028	0.8051	0.6568	0.85	0.4636		43	50	33	50	33	38
	284			8-methoxykynurenate	LC/MS neg	62955	C05830	HMDB0060426	76230					0.835575	0.67	1.31	0.68	0.35		0.9098	0.9084	0.0681	0.656	0.5547	0.9998	0.7416	1	0.6077	0.9942	0.2901	0.9315	0.1229	1		0.9664	1.4347	0.4981	1.1981	0.5759	0.8075	0.9614	0.6537		71	75	67	75	58	62
	287			picolinate	LC/MS pos early	1512	C10164	HMDB0002243	1018					1.14143	1.52	0.73	0.45	0.93		0.8166	0.9084	0.4427	0.8374	0.4306	0.9998	0.699	1	0.4576	0.9942	0.2153	0.9315	0.9893	1		1.1101	1.1519	1.0682	1.4527	0.9244	1.2671	1.7535	0.7806		71	75	67	75	58	62
	290			5-hydroxypicolinic acid	LC/MS pos early	63160			268740					0.478849	0.07	1.07	10.46	0.69		0.6108	0.8754	0.452	0.8374	0.5432	0.9998	0.4447	0.9908	0.9416	1	0.2769	0.9315	0.9253	1		0.695	0.8246	0.5653	0.4414	0.5865	0.3328	0.0581	0.6076		43	50	33	38	42	38
	292			serotonin	LC/MS pos early	2342	C00780	HMDB0000259	5202					1.77944	0.97	3.01	2.04	0.66		0.4077	0.8361	0.4556	0.8374	0.4379	0.9998	0.9705	1	0.2477	0.9942	0.2252	0.9315	0.9845	1		0.9911	1.1947	0.7875	1.1771	1.5776	1.7636	1.1594	2.3677		71	50	100	75	100	100
	293			N-acetylserotonin	LC/MS pos early	1500	C00978	HMDB0001238	903					0.430152	0.69	0.37	2.18	4.11		0.5273	0.8664	0.2141	0.7692	0.8161	0.9998	0.7819	1	0.5292	0.9942	0.4052	0.9315	0.3448	1		2.2141	0.8673	3.561	0.7335	2.433	0.9524	0.5997	1.305		57	50	67	50	58	54
	295			5-hydroxyindoleacetate	LC/MS pos early	437	C05635	HMDB0000763	1826					2.28008	2.42	2.1	0.68	0.78		0.0237	0.7678	0.2709	0.7906	0.7369	0.9998	0.0686	0.9488	0.1355	0.9942	0.2482	0.9315	0.6184	1		0.5352	0.6009	0.4696	1.0269	0.7287	1.2203	1.4529	0.9877		29	50	0	63	58	77
	299			tryptamine	LC/MS pos early	6104	C00398	HMDB0000303	1150					0.241407	0.08	0.37	5.85	1.27		0.2023	0.8076	0.6163	0.8374	0.5485	0.9998	0.2006	0.9488	0.6086	0.9942	0.3769	0.9315	0.9491	1		4.9837	4.3958	5.5715	2.3735	3.8133	1.2031	0.3512	2.055		86	100	67	75	67	62
	303			indolelactate	LC/MS neg	18349	C02043	HMDB0000671	92904					0.79131	1.52	0.39	0.46	1.8		0.7512	0.8961	0.4691	0.8374	0.298	0.9998	0.6119	0.9981	0.3233	0.9942	0.1611	0.9157	0.8344	1		2.0207	1.4453	2.596	1.8203	1.7993	1.599	2.1953	1.0027		100	100	100	100	100	100
	304			indoleacetate	LC/MS neg	27513	C00954	HMDB0000197	802					0.376768	1.06	0.23	1.02	4.68		0.0726	0.8076	0.0655	0.645	0.4999	0.9998	0.4097	0.9826	0.075	0.9942	0.3135	0.9315	0.109	1		2.7436	0.966	4.5211	0.9937	2.7835	1.0337	1.0215	1.0459		100	100	100	100	100	100
	310			indolepropionate	LC/MS neg	32405		HMDB0002302	3744					1.7452	1.18	2.4	1.77	0.87		0.9739	0.9214	0.9601	0.8698	0.8345	0.9998	0.8681	1	0.8977	0.9991	0.8342	0.9938	0.9194	1		0.9435	1.0114	0.8756	1.1002	1.4899	1.6466	1.1891	2.1042		100	100	100	100	92	92
	315			skatol	LC/MS neg	33021	C08313	HMDB0000466	6736					0.532802	0.5	0.58	0.84	0.72		0.2803	0.8076	0.5229	0.8374	0.9423	0.9998	0.4251	0.9855	0.4578	0.9942	0.6456	0.9784	0.65	1		1.3551	1.5787	1.1314	1.1822	0.8949	0.722	0.7857	0.6584		57	50	67	63	50	54
	316			indole	LC/MS neg	33965	C00463	HMDB0000738	798					0.517337	0.27	1.11	1.72	0.42		0.2352	0.8076	0.801	0.8616	0.2677	0.9998	0.1212	0.9488	0.9512	1	0.4811	0.9385	0.3848	1		1.9755	2.7876	1.1634	1.7699	1.2276	1.022	0.7522	1.2918		100	100	100	100	100	100
	321			indole-3-carboxylate	LC/MS neg	38116	C19837	HMDB0003320	69867					0.865706	1.17	0.72	1.31	2.13		0.7334	0.8894	0.3657	0.82	0.5001	0.9998	0.8165	1	0.4609	0.9942	0.8479	0.9938	0.3178	1		0.5622	0.3594	0.765	0.3906	0.6583	0.4867	0.4219	0.5516		43	25	67	38	50	46
	337		Leucine, Isoleucine and Valine Metabolism	leucine	LC/MS pos early	60	C00123	HMDB0000687	6106					0.912746	1.05	0.77	0.72	0.98		0.3862	0.8361	0.3013	0.8055	0.3031	0.9998	0.9068	1	0.1734	0.9942	0.104	0.8742	0.9979	1		1.1965	1.2071	1.1859	1.2402	1.0484	1.0921	1.2733	0.9109		100	100	100	100	100	100
	341			N-acetylleucine	LC/MS neg	1587	C02710	HMDB0011756	70912					1.05232	1.08	1	0.54	0.59		0.6585	0.8852	0.3134	0.8082	0.9204	0.9998	0.8136	1	0.6928	0.9942	0.3693	0.9315	0.5585	1		1.5979	2.0151	1.1807	2.0986	1.1808	1.6815	2.1821	1.181		100	100	100	100	100	100
	342			N-butyryl-leucine	LC/MS neg	63415								0.972497	0.87	1.25	0.54	0.38		0.5333	0.8664	0.2861	0.7965	0.9667	0.9998	0.647	1	0.6707	0.9942	0.4036	0.9315	0.4765	1		1.498	2.1779	0.8182	2.0337	0.9212	1.4568	1.8894	1.0241		100	100	100	100	100	100
	344			N-succinyl-leucine	LC/MS neg	63413			3467259					3.6528	0.78	8.41	6.48	0.6		0.8168	0.9084	0.9904	0.8773	0.5902	0.9998	0.8318	1	0.5751	0.9942	0.6697	0.9808	0.7254	1		0.6685	0.8339	0.5032	0.7432	2.3673	2.4419	0.6525	4.2313		43	50	33	38	33	31
	347			N-methylleucine	LC/MS pos early	35666			2777993					0.336333	0.19	1.1	1.07	0.19		0.5517	0.8742	0.446	0.8374	0.2986	0.9998	0.2646	0.9708	0.7384	0.9984	0.8157	0.9938	0.255	1		4.5339	7.643	1.4249	4.5592	1.4996	1.5249	1.4755	1.5743		57	75	33	63	75	77
	348			4-methyl-2-oxopentanoate	LC/MS neg	22116	C00233	HMDB0000695	70					0.529779	0.52	0.55	0.83	0.79		0.4153	0.8361	0.7318	0.8527	0.8799	0.9998	0.6452	1	0.481	0.9942	0.69	0.9883	0.9027	1		1.9225	2.1518	1.6931	1.6309	1.31	1.0185	1.1101	0.9268		100	100	100	100	92	92
	352			alpha-hydroxyisocaproate	LC/MS neg	22132	C03264	HMDB0000665 HMDB0000624 HMDB00746	92779;83697;439960					0.563148	1	0.31	0.53	1.72		0.7826	0.9061	0.4463	0.8374	0.527	0.9998	0.8046	1	0.5088	0.9942	0.2653	0.9315	0.933	1		3.1434	2.308	3.9787	2.3138	2.5998	1.7702	2.3195	1.2208		100	100	100	100	100	100
	356			isovalerate (i5:0)	LC/MS neg	44656	C08262	HMDB0000718	10430					0.536728	0.34	1.01	1.23	0.42		0.3222	0.8076	0.6003	0.8374	0.541	0.9998	0.2746	0.9708	0.7761	0.9984	0.9427	0.998	0.4715	1		2.4709	3.4868	1.4551	2.3377	1.4594	1.3262	1.1886	1.4637		100	100	100	100	100	100
	358			isovalerylglycine	LC/MS neg	35107		HMDB00678	546304					1.16381	0.99	1.52	0.78	0.51		0.7523	0.8961	0.106	0.6985	0.4546	0.9998	0.7635	1	0.4396	0.9942	0.4551	0.9315	0.1342	1		1.1184	1.4845	0.7523	1.4736	0.9463	1.3016	1.4627	1.1404		100	100	100	100	100	100
	368			beta-hydroxyisovalerate	LC/MS polar	12129		HMDB0000754	69362					1.17174	0.94	1.62	0.91	0.52		0.8146	0.9084	0.2306	0.7692	0.6657	0.9998	0.8914	1	0.6276	0.9942	0.5238	0.9484	0.2992	1		1.2676	1.6628	0.8723	1.609	1.1439	1.4853	1.5552	1.4154		86	100	67	100	92	100
	369			beta-hydroxyisovaleroylcarnitine	LC/MS pos early	35433								1.12287	0.96	1.27	1.52	1.15		0.8252	0.9084	0.5132	0.8374	0.7705	0.9998	0.961	1	0.709	0.9948	0.7674	0.9938	0.5476	1		0.9571	0.89	1.0242	0.8712	1.1606	1.0747	0.8524	1.2971		100	100	100	100	92	92
	372			3-methylglutaconate	LC/MS polar	57747		HMDB0000522	1551553					1.50126	0.49	6.16	2.69	0.22		0.8755	0.9084	0.8641	0.8629	0.0298	0.9998	0.1456	0.9488	0.0822	0.9942	0.055	0.7632	0.1786	1		0.6342	1.0432	0.2252	0.7795	0.8067	0.9521	0.5158	1.3883		100	100	100	88	100	92
	390			isoleucine	LC/MS pos early	1125	C16424 C00407 C06418	HMDB0000172	6306					0.930837	1.11	0.72	0.57	0.87		0.4802	0.8487	0.0938	0.6985	0.2274	0.9998	0.7193	1	0.1687	0.9942	0.0259	0.626	0.7421	1		1.2232	1.3052	1.1412	1.379	0.9829	1.1386	1.4527	0.8245		100	100	100	100	92	92
	392			N-acetylisoleucine	LC/MS neg	33967		HMDB0061684	306109					1.06107	1.08	1.01	0.42	0.45		0.6417	0.8789	0.2051	0.7692	0.895	0.9998	0.8181	1	0.6634	0.9942	0.2566	0.9315	0.4612	1		1.7307	2.3792	1.0822	2.4784	1.0887	1.8364	2.5777	1.0952		100	100	100	88	100	92
	393			N-butyryl-isoleucine	LC/MS neg	63416								1.12311	1.07	1.28	0.41	0.34		0.6613	0.8857	0.2517	0.7692	0.9004	0.9998	0.8291	1	0.6815	0.9942	0.303	0.9315	0.5089	1		1.7293	2.5814	0.8771	2.6698	1.0017	1.9422	2.7582	1.1262		100	100	100	100	100	100
	399			3-methyl-2-oxovalerate	LC/MS neg	15676	C00671 C06008 C03465	HMDB0000491	440877;439286					0.396025	0.54	0.32	1.07	1.84		0.155	0.8076	0.7717	0.8572	0.615	0.9998	0.5105	0.9912	0.1632	0.9942	0.8624	0.9938	0.6142	1		1.7461	1.2306	2.2615	0.9499	1.4877	0.6915	0.6692	0.7139		71	75	67	88	67	77
	400			2-hydroxy-3-methylvalerate	LC/MS neg	36746		HMDB0000317	164623					0.550064	1.1	0.28	0.53	2.04		0.7361	0.8894	0.4184	0.8374	0.4581	0.9998	0.7779	1	0.4331	0.9942	0.2166	0.9315	0.9649	1		3.9859	2.618	5.3538	2.7443	3.4341	2.1925	2.8707	1.5143		100	100	100	100	100	100
	412			ethylmalonate	LC/MS polar	15765		HMDB0000622	11756					1.84456	1.38	2.95	0.9	0.42		0.0927	0.8076	0.1907	0.7635	0.3656	0.9998	0.5643	0.9954	0.0649	0.9942	0.7295	0.9938	0.1632	1		0.864	1.2175	0.5104	1.4489	1.0088	1.5937	1.6802	1.5071		100	100	100	100	100	100
	415			methylsuccinate	LC/MS polar	15745		HMDB0001844	10349					0.868508	1.26	0.43	0.31	0.89		0.4792	0.8485	0.2614	0.7787	0.3225	0.9998	0.8412	1	0.2215	0.9942	0.0963	0.8655	0.9285	1		1.883	1.988	1.7781	2.2461	1.2724	1.6354	2.5042	0.7666		100	100	100	100	100	100
	419			2,3-dimethylsuccinate	LC/MS polar	20703			11848					1.26715	0.63	3.35	1.62	0.31		0.4936	0.8549	0.946	0.8674	0.7644	0.9998	0.7892	1	0.4743	0.9942	0.7664	0.9938	0.8825	1		1.2345	1.891	0.5779	1.5431	1.2557	1.5643	1.1952	1.9334		100	100	100	100	100	100
	421			valine	LC/MS pos early	1649	C00183	HMDB0000883	6287					0.918851	1.06	0.75	0.6	0.85		0.5345	0.8664	0.1529	0.7336	0.3321	0.9998	0.805	1	0.2507	0.9942	0.0602	0.8069	0.7543	1		1.3087	1.4121	1.2052	1.4575	1.0536	1.2025	1.503	0.9019		100	100	100	100	100	100
	422			N-acetylvaline	LC/MS neg	1591		HMDB0011757	66789					1.15828	1.12	1.23	0.57	0.52		0.571	0.8754	0.0723	0.6622	0.9883	0.9998	0.7036	1	0.6711	0.9942	0.1421	0.9157	0.2351	1		1.2181	1.6052	0.8311	1.7022	0.9268	1.4109	1.7992	1.0226		100	100	100	100	100	100
	428			3-methyl-2-oxobutyrate	LC/MS polar	44526	C00141	HMDB0000019	49					0.471948	1.03	0.27	0.75	2.82		0.0203	0.7678	0.136	0.7149	0.012	0.9998	0.8609	1	0.0012	0.9942	0.3218	0.9315	0.0128	1		1.1853	0.6213	1.7493	0.6302	1.1145	0.5594	0.6391	0.4797		43	25	67	38	25	23
	429			alpha-hydroxyisovalerate	LC/MS polar	46537		HMDB0000407	99823					0.525638	0.97	0.3	0.61	1.97		0.7009	0.8894	0.5616	0.8374	0.5841	0.9998	0.9097	1	0.4987	0.9942	0.3656	0.9315	0.983	1		3.8205	2.5757	5.0653	2.5356	3.293	2.0082	2.4956	1.5208		100	100	100	100	100	100
	432			isobutyrylglycine	LC/MS neg	35437		HMDB0000730	10855600					1.46533	1.1	2.19	1	0.5		0.295	0.8076	0.1907	0.7635	0.321	0.9998	0.9684	1	0.1442	0.9942	0.7855	0.9938	0.1478	1		0.8003	1.0658	0.5348	1.1206	0.8524	1.1727	1.1754	1.17		86	100	67	88	83	85
	440		Methionine, Cysteine, SAM and Taurine Metabolism	methionine	LC/MS pos early	1302	C00073	HMDB0000696	6137					0.664499	0.68	0.65	0.86	0.9		0.0876	0.8076	0.7518	0.8528	0.8296	0.9998	0.2876	0.9708	0.1568	0.9942	0.6679	0.9808	0.9485	1		1.1994	1.26	1.1389	1.0578	0.9386	0.797	0.8556	0.7383		100	100	100	100	100	100
	441			N-acetylmethionine	LC/MS neg	1589	C02712	HMDB0011745	448580					0.781932	0.83	0.74	0.89	1.01		0.4227	0.8361	0.7641	0.8555	0.4915	0.9998	0.9359	1	0.2822	0.9942	0.7513	0.9938	0.5299	1		1.7467	1.7421	1.7514	1.5923	1.5203	1.3658	1.4424	1.2891		100	100	100	100	100	100
	442			N-propionylmethionine	LC/MS neg	43506		HMDB0094704	21117855					0.675349	0.44	0.91	2.06	1.01		0.1638	0.8076	0.5602	0.8374	0.9498	0.9998	0.3108	0.9708	0.3242	0.9942	0.6015	0.9613	0.7399	1		2.4571	2.4469	2.4673	1.7655	2.351	1.6594	1.0841	2.2348		100	100	100	88	100	92
	443			N-formylmethionine	LC/MS neg	2829	C03145	HMDB0001015	439750					0.95493	0.78	1.12	1.45	1.01		0.6626	0.8857	0.3198	0.8125	0.7136	0.9998	0.5818	0.9954	0.9594	1	0.2742	0.9315	0.6832	1		1.0162	1.0114	1.0209	0.9022	1.0843	0.9704	0.7931	1.1477		100	100	100	100	100	100
	444			S-methylmethionine	LC/MS pos early	38127	C05319	HMDB0038670	458					2.07006	2.38	1.76	0.74	1		0.1496	0.8076	0.8913	0.8629	0.8913	0.9998	0.2729	0.9708	0.3313	0.9942	0.8252	0.9938	1	1		0.2869	0.2869	0.2869	0.4854	0.3954	0.5939	0.6839	0.5038		14	0	33	13	33	31
	445			methionine sulfone	LC/MS pos early	44878		HMDB0062174	69961					2.13443	2.66	1.26	0.28	0.59		0.0646	0.8076	0.0037	0.4006	0.1397	0.9998	0.0271	0.7592	0.7574	0.9984	0.001	0.3397	0.2586	1		0.8004	1.0048	0.596	1.8363	0.6725	1.7084	2.6678	0.749		100	100	100	100	100	100
	446			methionine sulfoxide	LC/MS pos early	18374	C02989	HMDB0002005	158980					1.34411	1.35	1.34	0.75	0.76		0.1648	0.8076	0.1313	0.7149	0.9035	0.9998	0.294	0.9708	0.3459	0.9942	0.1849	0.9315	0.3645	1		0.8814	1.0026	0.7602	1.1779	0.8882	1.1847	1.3532	1.0162		100	100	100	100	100	100
	447			N-acetylmethionine sulfoxide	LC/MS pos early	45428			11902949					1.86447	2.25	1.48	0.67	1.01		0.3582	0.8139	0.4668	0.8374	0.2832	0.9998	0.1767	0.9488	0.9061	0.9999	0.1529	0.9157	0.8193	1		0.9267	0.9213	0.9321	1.4976	1.1569	1.7278	2.0738	1.3817		100	100	100	100	100	100
	454			2,3-dihydroxy-5-methylthio-4-pentenoate (DMTPA)*	LC/MS neg	62805		HMDB0240388						1.68598	1.45	2.01	1.01	0.73		0.6837	0.8894	0.7036	0.8476	0.5269	0.9998	0.8754	1	0.4503	0.9942	0.8365	0.9938	0.52	1		0.6385	0.7382	0.5388	0.9034	0.8116	1.0765	1.0687	1.0843		57	75	33	63	75	77
	455			2-hydroxy-4-(methylthio)butanoic acid	LC/MS polar	63739		HMDB0037115	11427					0.347752	0.48	0.24	0.63	1.23		0.326	0.8076	0.4854	0.8374	0.6703	0.9998	0.6956	1	0.3072	0.9942	0.3671	0.9315	0.8606	1		5.4743	4.9057	6.0429	3.6208	3.7572	1.9037	2.336	1.4715		100	100	100	100	100	100
	456			homocysteine	LC/MS pos early	15128	C00155	HMDB0000742	778					0.797786	0.74	1.01	0.35	0.26		0.892	0.9084	0.0123	0.4823	0.5875	0.9998	0.7788	1	0.6211	0.9942	0.0149	0.535	0.1687	1		1.1023	1.7529	0.4517	1.5269	0.4548	0.8794	1.301	0.4579		86	75	100	88	83	85
	460			alpha-ketobutyrate	LC/MS polar	4968	C00109	HMDB0000005	58					0.5237	0.36	0.65	2.18	1.21		0.1465	0.8076	0.6705	0.8462	0.9939	0.9998	0.3123	0.9708	0.2801	0.9942	0.7352	0.9938	0.7825	1		1.8291	1.6532	2.005	1.128	1.659	0.9579	0.6028	1.313		100	100	100	75	58	46
	461			cysteine	LC/MS pos early	1868	C00097	HMDB0000574	5862					0.53983	0.3	1.13	1.53	0.41		0.1983	0.8076	0.909	0.8629	0.1357	0.9998	0.0625	0.9488	0.8693	0.9984	0.2565	0.9315	0.2989	1		1.765	2.5101	1.02	1.6321	1.0857	0.9528	0.7541	1.1514		100	100	100	100	100	100
	462			N-acetylcysteine	LC/MS pos early	1586	C06809	HMDB0001890	12035					0.842461	0.69	1.08	0.97	0.62		0.8971	0.9084	0.5704	0.8374	0.4642	0.9998	0.5533	0.9954	0.6582	0.9942	0.892	0.9953	0.4102	1		1.4333	1.7674	1.0992	1.4978	1.1429	1.2075	1.2283	1.1867		100	100	100	88	100	92
	463			S-methylcysteine	LC/MS pos early	39592		HMDB0002108	88180;7058174;24417					1.11889	0.56	1.79	2.67	0.83		0.8984	0.9084	0.3839	0.8298	0.3085	0.9998	0.4287	0.9855	0.5111	0.9942	0.135	0.9157	0.9218	1		0.8781	0.9591	0.7971	0.7476	1.1131	0.9825	0.536	1.429		57	50	67	50	67	62
	466			S-carboxyethylcysteine	LC/MS pos early	64177								1.10533	0.26	4.34	4.34	0.26		0.9246	0.9084	0.9246	0.865	0.2166	0.9998	0.3562	0.9708	0.3985	0.9942	0.3502	0.9315	0.3921	1		0.9693	1.5369	0.4016	0.9693	1.0714	1.0714	0.4016	1.7412		43	50	33	25	33	23
	467			cysteine s-sulfate	LC/MS polar	22176	C05824	HMDB0000731	115015					1.1895	1.16	1.25	0.6	0.55		0.9203	0.9084	0.136	0.7149	0.9309	0.9998	0.9927	1	0.8917	0.9991	0.2483	0.9315	0.3072	1		1.1124	1.4319	0.7929	1.5436	0.892	1.3232	1.6553	0.9911		100	100	100	100	100	100
	468			cystine	LC/MS pos early	56	C00491	HMDB0000192	67678					0.808594	0.63	1.16	0.96	0.52		0.8427	0.9084	0.3664	0.82	0.3885	0.9998	0.4654	0.9912	0.6245	0.9942	0.9726	1	0.2649	1		1.3009	1.7081	0.8936	1.3897	0.9631	1.0519	1.0713	1.0326		86	100	67	100	92	100
	474			cysteine sulfinic acid	LC/MS pos early	37443	C00606	HMDB0000996	109					0.81345	0.6	1.28	0.97	0.45		0.6859	0.8894	0.2674	0.7845	0.2767	0.9998	0.3062	0.9708	0.6097	0.9942	0.9854	1	0.167	1		1.3621	1.8732	0.851	1.4992	0.9709	1.108	1.1252	1.0908		100	100	100	100	100	100
	477			taurine	LC/MS pos early	2125	C00245	HMDB0000251	1123					0.0592572	0.07	0.04	0.48	0.8		0.3389	0.8101	0.7804	0.8572	0.6	0.9998	0.7607	1	0.284	0.9942	0.5175	0.9456	0.8749	1		41.2861	45.928	36.6441	24.6153	19.1173	2.4465	3.3026	1.5905		100	100	100	100	100	100
	478			N-methyltaurine	LC/MS polar	42989			7882					1.94612	1.65	2.19	1.62	1.22		0.3139	0.8076	0.7545	0.8528	0.999	0.9998	0.4846	0.9912	0.4601	0.9942	0.8011	0.9938	0.8415	1		0.4863	0.4372	0.5355	0.5792	0.8535	0.9464	0.7212	1.1716		57	50	67	63	50	54
	479			N-acetyltaurine	LC/MS neg	48187		HMDB0240253	159864					0.0859809	0.12	0.04	0.27	0.73		0.3025	0.8076	0.7875	0.8604	0.578	0.9998	0.7368	1	0.2512	0.9942	0.5057	0.9438	0.8541	1		7.5761	8.7788	6.3735	4.9039	3.3236	0.6514	1.0291	0.2737		43	50	33	50	25	31
	487			3-sulfo-alanine	LC/MS pos early	47089	C00506	HMDB0002757	72886					1.25263	0.78	3.64	0.91	0.2		0.3786	0.8361	0.0973	0.6985	0.3616	0.9998	0.9818	1	0.1975	0.9942	0.5158	0.9456	0.1051	1		1.6716	2.7956	0.5476	2.4941	1.2715	2.0939	2.1925	1.9953		100	100	100	100	100	100
	490		Urea cycle; Arginine and Proline Metabolism	arginine	LC/MS pos early	1638	C00062	HMDB0000517	6322					1.4279	0.89	5.68	0.8	0.13		0.4769	0.8485	0.617	0.8374	0.9657	0.9998	0.6443	1	0.5814	0.9942	0.711	0.9938	0.7292	1		3.5366	6.2854	0.7878	5.9536	2.6329	5.0499	5.6218	4.4781		100	100	100	100	100	100
	493			methylurea	LC/MS pos early	34378	C16363		11719					1.38949	1.28	1.6	0.66	0.53		0.3338	0.8101	0.4206	0.8374	0.8039	0.9998	0.4034	0.9826	0.5951	0.9942	0.3958	0.9315	0.7196	1		1.2108	1.5845	0.837	1.8052	1.0879	1.6824	2.0259	1.3389		43	25	67	63	83	92
	494			ornithine	LC/MS pos early	1493	C00077	HMDB0000214	6262					0.917136	0.75	1.1	1.4	0.96		0.4267	0.8361	0.7387	0.8527	0.5704	0.9998	0.352	0.9708	0.8655	0.9984	0.4683	0.9315	0.8806	1		1.1718	1.1975	1.146	1.0457	1.2008	1.0747	0.894	1.2555		100	100	100	100	100	100
	496			3-amino-2-piperidone	LC/MS pos early	62853		HMDB0000323	5200225					0.558388	0.17	2.1	3.13	0.25		0.1301	0.8076	0.8863	0.8629	0.0105	0.9998	0.0071	0.6867	0.3568	0.9942	0.0256	0.626	0.0991	1		2.0047	3.202	0.8074	1.872	1.2521	1.1194	0.5421	1.6967		100	100	100	100	100	100
	497			norvaline	LC/MS pos early	37426	C01826	HMDB0013716	824					0.902752	0.67	1.09	1.94	1.2		0.6687	0.8871	0.912	0.8629	0.6359	0.9998	0.5368	0.9954	0.9733	1	0.7685	0.9938	0.7101	1		1.5445	1.4059	1.6831	1.1771	1.7617	1.3943	0.9484	1.8402		86	100	67	100	92	100
	498			2-oxoarginine*	LC/MS pos early	55072	C03771	HMDB0004225	558					0.450602	0.23	2.22	1.22	0.13		0.8647	0.9084	0.3508	0.8125	0.2442	0.9998	0.4868	0.9912	0.3287	0.9942	0.8436	0.9938	0.1864	1		2.66	4.7288	0.5913	2.9052	0.9534	1.1986	1.0816	1.3156		86	100	67	100	92	100
	499			citrulline	LC/MS pos early	2132	C00327	HMDB0000904	9750					0.975756	1.04	0.91	0.91	1.04		0.9518	0.9199	0.9969	0.8791	0.5227	0.9998	0.6894	1	0.6094	0.9942	0.6066	0.9629	0.6812	1		1.0312	1.0113	1.0511	1.0315	1.0059	1.0062	1.0518	0.9606		100	100	100	100	100	100
	501			homocitrulline	LC/MS pos early	22138	C02427	HMDB0000679	65072					1.07121	1.07	1.07	0.65	0.65		0.6249	0.8754	0.4502	0.8374	0.8723	0.9998	0.6553	1	0.8101	0.9984	0.6282	0.9747	0.5593	1		1.3482	1.6316	1.0648	1.6924	1.1001	1.4442	1.7531	1.1354		100	100	100	100	100	100
	502			proline	LC/MS pos early	1898	C00148 C000763	HMDB0000162 HMDB0003411	145742;614;8988					0.896936	0.96	0.83	0.84	0.97		0.7013	0.8894	0.9856	0.8766	0.5943	0.9998	0.9176	1	0.5058	0.9942	0.6558	0.9804	0.7427	1		1.3477	1.3681	1.3273	1.3401	1.2164	1.2088	1.3122	1.1054		100	100	100	100	100	100
	505			dimethylarginine (SDMA + ADMA)	LC/MS pos early	36808	C21189 C03626	HMDB0003334 HMDB0001539	123831;169148					1.34574	1.2	1.42	2.34	1.97		0.8316	0.9084	0.3063	0.8057	0.9019	0.9998	0.8175	1	0.948	1	0.4623	0.9315	0.463	1		0.5802	0.3903	0.77	0.4288	0.9321	0.7808	0.4674	1.0942		71	75	67	63	83	77
	506			N-acetylarginine	LC/MS pos early	33953	C02562	HMDB0004620	67427					0.84842	0.64	1.46	0.8	0.35		0.65	0.8813	0.683	0.8475	0.9341	0.9998	0.7982	1	0.6957	0.9942	0.7919	0.9938	0.7546	1		1.4395	2.1329	0.7461	1.7442	0.9165	1.2213	1.3556	1.0869		100	100	100	100	100	100
	508			carboxymethylarginine	LC/MS pos early	64071		HMDB39111						0.108197	0.04	4.25	1.56	0.02		0.8674	0.9084	0.6211	0.8374	0.4532	0.9998	0.5281	0.9954	0.6682	0.9942	0.8332	0.9938	0.4299	1		3.4853	6.8626	0.108	3.5787	0.2836	0.3771	0.2948	0.4593		29	25	33	25	42	38
	511			N-acetylcitrulline	LC/MS neg	48434	C15532 C02851	HMDB0000856	656979					0.558348	0.56	0.56	0.98	0.98		0.2658	0.8076	0.8547	0.8629	0.969	0.9998	0.4245	0.9855	0.4288	0.9942	0.9071	0.9953	0.8877	1		1.5399	1.5586	1.5212	1.2144	1.1853	0.8598	0.8702	0.8495		100	100	100	88	92	85
	512			N-acetylproline	LC/MS pos early	34387		HMDB0094701	322640					5.81872	5.52	6.52	0.51	0.43		0.0237	0.7678	0.2777	0.7906	0.7478	0.9998	0.155	0.9488	0.0561	0.9942	0.5286	0.9484	0.3697	1		0.6079	0.8498	0.366	2.7684	1.3767	3.5372	4.687	2.3874		100	100	100	100	100	100
	513			2-methyl-proline	LC/MS pos early	64214			6993664;6993663					1.16395	0.85	1.65	1.24	0.64		0.7673	0.9012	0.8552	0.8629	0.5956	0.9998	0.8708	1	0.5478	0.9942	0.5649	0.9591	0.8237	1		1.0656	1.3003	0.8308	1.2044	1.1014	1.2403	1.1085	1.372		100	100	100	100	100	100
	514			carboxymethylproline	LC/MS pos early	64578			45116053					1.94475	2.45	1.51	0.71	1.15		0.4332	0.8368	0.914	0.8629	0.9263	0.9998	0.5459	0.9954	0.6119	0.9942	0.8712	0.9938	0.9921	1		0.7747	0.7205	0.8288	1.2417	1.0396	1.5066	1.7629	1.2503		86	100	67	100	75	85
	515			N-delta-acetylornithine	LC/MS polar	43249	C00437	HMDB0003357	9920500					1.08897	0.99	1.16	1.53	1.3		0.8588	0.9084	0.1989	0.7637	0.8375	0.9998	0.7925	1	0.9841	1	0.2285	0.9315	0.4819	1		1.0026	0.8716	1.1336	0.8677	1.2267	1.0918	0.8637	1.3199		100	100	100	100	100	100
	516			N-alpha-acetylornithine	LC/MS pos early	32984	C00437	HMDB0003357	439232					1.23975	1.54	1.07	1.25	1.79		0.4455	0.839	0.1735	0.7407	0.5101	0.9998	0.3319	0.9708	0.9379	1	0.5522	0.954	0.2005	1		0.9172	0.658	1.1765	0.8353	1.219	1.1371	1.0126	1.2616		100	100	100	100	100	100
	520			trans-4-hydroxyproline	LC/MS pos early	32306	C01157	HMDB0000725	5810					1.27558	2.04	1.05	1.7	3.32		0.3011	0.8076	0.0125	0.4823	0.4878	0.9998	0.2393	0.9708	0.7972	0.9984	0.1082	0.8759	0.0395	1		1.1162	0.5172	1.7152	0.7859	1.7541	1.4238	1.0546	1.793		100	100	100	100	100	100
	525			N-methylproline	LC/MS pos early	37431		HMDB0094696	643474					3.20322	0.73	4.5	11.74	1.91		0.3488	0.8101	0.3494	0.8125	0.2201	0.9998	0.8335	1	0.1218	0.9942	0.0889	0.8655	0.8451	1		1.1623	0.7983	1.5263	0.6914	4.194	3.7231	0.5845	6.8618		86	75	100	88	100	100
	526			N,N,N-trimethyl-alanylproline betaine (TMAP)	LC/MS pos early	62947		HMDB0240365						54.6228	1.98	68.78	128.86	3.72		0.341	0.8101	0.1047	0.6985	0.6365	0.9998	0.7359	1	0.302	0.9942	0.094	0.8655	0.4423	1		0.7598	0.3221	1.1975	0.4806	41.7815	41.5024	0.6392	82.3655		57	50	67	63	83	85
	528			N-monomethylarginine	LC/MS pos early	43586	C03884	HMDB0029416	132862					1.19316	0.93	1.93	0.76	0.36		0.6119	0.8754	0.1623	0.7336	0.508	0.9998	0.9141	1	0.3968	0.9942	0.533	0.9484	0.1918	1		0.8066	1.1823	0.4309	1.1385	0.6305	0.9624	1.0947	0.8301		43	50	33	50	50	54
	529			argininate*	LC/MS pos early	57461		HMDB0003148	160437					1.72409	1.67	1.79	0.9	0.84		0.2302	0.8076	0.9621	0.8698	0.9808	0.9998	0.4131	0.9826	0.3677	0.9942	0.9849	1	0.9637	1		0.9677	1.0543	0.8811	1.406	1.23	1.6684	1.7578	1.579		100	100	100	100	100	100
	532			N-acetylhomocitrulline	LC/MS pos early	62707								0.980377	0.65	1.35	1.84	0.89		0.5142	0.8612	0.5206	0.8374	0.2332	0.9998	0.2087	0.9515	0.6822	0.9942	0.1448	0.9157	0.7159	1		1.009	1.0697	0.9483	0.8825	1.1157	0.9892	0.6954	1.283		100	100	100	100	92	92
	535		Creatine Metabolism	guanidinoacetate	LC/MS pos early	43802	C00581	HMDB0000128	763					1.7134	2.27	1.22	0.6	1.13		0.1564	0.8076	0.4479	0.8374	0.2324	0.9998	0.0792	0.9488	0.86	0.9984	0.1221	0.8981	0.772	1		0.3395	0.3194	0.3596	0.5222	0.399	0.5817	0.7251	0.4384		29	25	33	38	17	23
	536			creatine	LC/MS pos early	27718	C00300	HMDB0000064	586					0.605855	0.78	0.53	1.43	2.12		0.8364	0.9084	0.356	0.8125	0.19	0.9998	0.4375	0.9905	0.2668	0.9942	0.7396	0.9938	0.1595	1		3.5733	2.2893	4.8573	2.0343	3.7039	2.1649	1.7794	2.5504		100	100	100	100	100	100
	537			creatinine	LC/MS pos early	513	C00791	HMDB0000562	588					7.222	1.46	12.75	9.12	1.04		0.6021	0.8754	0.5314	0.8374	0.9006	0.9998	0.6568	1	0.7716	0.9984	0.6839	0.9816	0.6324	1		1.7162	1.6802	1.7523	2.0643	12.0463	12.3944	2.4485	22.3404		86	75	100	88	100	100
	539			N-methylhydantoin	LC/MS neg	40006	C02565	HMDB0003646	69217					1.7498	0.42	5.47	4.7	0.36		0.7566	0.8961	0.9597	0.8698	0.2648	0.9998	0.5716	0.9954	0.2996	0.9942	0.3436	0.9315	0.4924	1		1.1119	1.6368	0.5871	1.1597	1.8978	1.9456	0.6827	3.2086		14	25	0	25	42	46
	542		Polyamine Metabolism	agmatine	LC/MS pos early	15496	C00179	HMDB0001432	199					4.0789	1.88	7.41	2.6	0.66		0.1053	0.8076	0.8568	0.8629	0.55	0.9998	0.4582	0.9912	0.1092	0.9942	0.53	0.9484	0.7893	1		0.3587	0.4321	0.2852	0.6221	1.1997	1.4631	0.812	2.1142		29	25	33	63	58	77
	543			acetylagmatine	LC/MS pos early	62698	C02131		439661					1.49955	0.97	2.05	2.05	0.97		0.6776	0.8894	0.6776	0.847	0.593	0.9998	0.9343	1	0.4902	0.9942	0.4448	0.9315	0.9392	1		0.8924	0.9077	0.877	0.8924	1.3382	1.3382	0.877	1.7994		14	25	0	13	17	15
	545			putrescine	LC/MS pos early	1408	C00134	HMDB0001414	1045					3.01127	3.73	2.93	6.89	8.77		0.7887	0.9063	0.3133	0.8082	0.4969	0.9998	0.5155	0.9944	0.762	0.9984	0.7833	0.9938	0.2857	1		1.3396	0.2741	2.4051	0.648	4.7255	4.0339	1.0219	7.0459		43	25	67	38	67	62
	546			N-acetylputrescine	LC/MS pos early	37496	C02714	HMDB0002064	122356					0.494437	0.09	2.52	5.89	0.2		0.6358	0.8754	0.6594	0.8444	0.809	0.9998	0.6234	1	0.865	0.9984	0.582	0.9599	0.8987	1		10.0668	16.7605	3.3732	9.1027	5.9416	4.9774	1.4449	8.51		100	100	100	100	100	100
	548			butyrylputrescine/isobutyrylputrescine	LC/MS pos early	64281								0.618496	0.33	0.74	5.24	2.37		0.4466	0.839	0.4054	0.8374	0.4967	0.9998	0.9543	1	0.2981	0.9942	0.8992	0.9953	0.3387	1		4.282	2.5423	6.0217	1.6955	5.235	2.6484	0.8487	4.4482		57	50	67	50	75	69
	550			N-carbamoylputrescine	LC/MS pos early	63854	C00436	HMDB0033458	502					1.73254	0.93	3.15	1.92	0.57		0.3021	0.8076	0.9432	0.8674	0.819	0.9998	0.5746	0.9954	0.3578	0.9942	0.8083	0.9938	0.92	1		2.2351	2.8521	1.618	2.7516	3.3559	3.8724	2.651	5.0938		100	100	100	100	100	100
	552			N-acetyl-isoputreanine	LC/MS pos early	62309			131802901					0.4994	0.26	1.92	1.2	0.17		0.5181	0.8612	0.6469	0.8374	0.9518	0.9998	0.6264	1	0.668	0.9942	0.7473	0.9938	0.7411	1		4.1676	7.1545	1.1806	4.5237	1.7252	2.0813	1.8928	2.2698		57	50	67	50	50	46
	553			spermidine	LC/MS pos early	485	C00315	HMDB0001257	1102					0.204302	0.12	1.05	0.91	0.1		0.3992	0.8361	0.7965	0.861	0.6646	0.9998	0.3821	0.9767	0.761	0.9984	0.8864	0.9953	0.6603	1		7.5868	13.7694	1.4043	7.6975	1.4393	1.55	1.6256	1.4744		100	100	100	100	100	100
	557			diacetylspermidine*	LC/MS pos early	62105	C03413	HMDB0002172	132680					1.09426	0.82	1.64	0.99	0.49		0.6075	0.8754	0.8978	0.8629	0.8494	0.9998	0.629	1	0.8124	0.9984	0.797	0.9938	0.9688	1		1.2508	1.6738	0.8277	1.5253	1.0942	1.3687	1.3769	1.3606		57	50	67	75	83	92
	558			(N(1) + N(8))-acetylspermidine	LC/MS pos early	57814	C00612 C01029	HMDB0001276 HMDB0002189	123689;496					1.26465	0.68	1.91	2.57	0.91		0.9271	0.9087	0.577	0.8374	0.7013	0.9998	0.8405	1	0.7292	0.9976	0.449	0.9315	0.9108	1		1.8239	1.9099	1.738	1.6018	2.5288	2.3066	1.2936	3.3197		100	100	100	100	100	100
	559			acisoga	LC/MS pos early	43258		HMDB0061384	129397					1.4078	1.01	2.06	1.24	0.61		0.2231	0.8076	0.4349	0.8374	0.3833	0.9998	0.8019	1	0.1343	0.9942	0.9394	0.9974	0.2962	1		1.0748	1.3393	0.8103	1.3466	1.2413	1.5131	1.354	1.6723		100	100	100	100	100	100
	562			N1,N12-diacetylspermine	LC/MS pos early	52987	C03413	HMDB0002172	132680					1.83581	0.77	2.98	3.59	0.93		0.7588	0.8967	0.492	0.8374	0.9864	0.9998	0.8236	1	0.8325	0.9984	0.5868	0.9599	0.6528	1		0.5853	0.6064	0.5642	0.5374	1.1224	1.0745	0.4684	1.6806		57	50	67	50	75	69
	564			5-methylthioadenosine (MTA)	LC/MS pos early	1419	C00170	HMDB0001173	439176					0.85744	0.77	0.93	1.32	1.09		0.4451	0.839	0.5003	0.8374	0.787	0.9998	0.4778	0.9912	0.7159	0.9976	0.4469	0.9315	0.7952	1		0.625	0.5969	0.6532	0.5297	0.6313	0.5359	0.4625	0.6094		29	25	33	13	33	23
	568			4-acetamidobutanoate	LC/MS pos early	1558	C02946	HMDB0003681	18189					1.68396	0.46	7	3.55	0.23		0.2676	0.8076	0.9238	0.865	0.1184	0.9998	0.7347	1	0.0582	0.9942	0.2272	0.9315	0.2827	1		1.3182	2.1414	0.4949	1.5584	1.9795	2.2198	0.9755	3.4641		86	100	67	100	92	100
	570		Guanidino and Acetamido Metabolism	1-methylguanidine	LC/MS pos early	48114	C02294	HMDB0001522	10111					1.67028	1.04	2.88	1.45	0.52		0.4541	0.8445	0.9475	0.8674	0.3302	0.9998	0.8727	1	0.215	0.9942	0.4595	0.9315	0.5053	1		0.8313	1.0918	0.5708	1.1117	1.1082	1.3885	1.1315	1.6455		71	75	67	75	83	85
	571			4-guanidinobutanoate	LC/MS pos early	15681	C01035	HMDB0003464	500					1.52803	1.11	2.56	0.94	0.41		0.1856	0.8076	0.462	0.8374	0.5355	0.9998	0.6134	0.9983	0.161	0.9942	0.9237	0.9953	0.3906	1		1.0327	1.4674	0.5981	1.5451	1.0656	1.578	1.6229	1.5331		100	100	100	100	100	100
	572			guanidinosuccinate	LC/MS pos early	32446	C03139	HMDB0003157	439918					0.730878	0.33	2.03	1.9	0.31		0.8223	0.9084	0.697	0.8476	0.2384	0.9998	0.3329	0.9708	0.4782	0.9942	0.5126	0.9443	0.3177	1		0.7413	1.1323	0.3503	0.7531	0.53	0.5418	0.3739	0.7096		29	50	0	38	17	23
	587		Glutathione Metabolism	5-oxoproline	LC/MS neg	1494	C01879 C02237	HMDB0000267	439685;7405					2.08823	2.77	1.23	0.36	0.8		0.6083	0.8754	0.55	0.8374	0.8023	0.9998	0.6006	0.9981	0.8475	0.9984	0.4942	0.9385	0.8237	1		1.1051	1.2254	0.9848	2.3124	1.1003	2.3077	3.3995	1.2159		100	100	100	100	100	100
	590			2-hydroxybutyrate/2-hydroxyisobutyrate	LC/MS polar	52281	C21297 C05984	HMDB0000729 HMDB00008	4277439;440864					0.569073	0.74	0.46	0.93	1.49		0.5166	0.8612	0.8492	0.8629	0.7338	0.9998	0.4979	0.9912	0.8201	0.9984	0.6686	0.9808	0.9237	1		2.0623	1.6547	2.4698	1.4361	1.7998	1.1736	1.2175	1.1297		100	100	100	100	100	100
	644		Lactoyl Amino Acid	N-lactoyl phenylalanine	LC/MS neg	64881								0.906781	0.67	1.19	1.5	0.84		0.8184	0.9084	0.9004	0.8629	0.8941	0.9998	0.8033	1	0.9438	1	0.8347	0.9938	0.996	1		1.4246	1.5462	1.3029	1.2902	1.4261	1.2918	1.0342	1.5493		100	100	100	100	92	92
	647			N-lactoyl histidine	LC/MS neg	64878								2.70704	1	4.42	4.42	1		0.6342	0.8754	0.6342	0.8374	0.6342	0.9998	1	1	0.4897	0.9942	0.4442	0.9315	1	1		0.0611	0.0611	0.0611	0.0611	0.1654	0.1654	0.0611	0.2698		14	25	0	13	8	8
	648	Peptide	Gamma-glutamyl Amino Acid	gamma-glutamylalanine	LC/MS pos early	37063	C03738	HMDB0029142	440103					0.869917	1.03	0.72	0.74	1.06		0.5928	0.8754	0.5646	0.8374	0.2521	0.9998	0.6648	1	0.2244	0.9942	0.1702	0.918	0.7078	1		1.0624	1.0299	1.0949	1.0476	0.9389	0.9242	1.0653	0.783		100	100	100	100	75	77
	650			gamma-glutamylglutamate	LC/MS pos early	36738	C05282	HMDB0011737	92865					0.49649	0.39	0.72	0.83	0.45		0.3505	0.8101	0.4968	0.8374	0.5774	0.9998	0.3086	0.9708	0.7782	0.9984	0.9197	0.9953	0.4331	1		1.5241	2.0959	0.9522	1.4611	0.8196	0.7567	0.8263	0.687		71	75	67	75	83	85
	651			gamma-glutamylglutamine	LC/MS pos early	2730	C05283	HMDB0011738	150914					1.07065	1.59	0.6	0.42	1.1		0.598	0.8754	0.8377	0.8624	0.2358	0.9998	0.64	1	0.2154	0.9942	0.2613	0.9315	0.5241	1		0.8847	0.8409	0.9285	1.0892	0.7428	0.9472	1.3374	0.5571		86	75	100	63	50	38
	653			gamma-glutamylhistidine	LC/MS pos early	18245		HMDB0029151	7017195					2.63412	0.92	5.49	3.56	0.6		0.2727	0.8076	0.6215	0.8374	0.3494	0.9998	0.9073	1	0.1454	0.9942	0.2527	0.9315	0.7733	1		0.5059	0.6329	0.3789	0.6088	1.2297	1.3326	0.5847	2.0806		57	50	67	50	67	62
	654			gamma-glutamylisoleucine*	LC/MS pos early	34456		HMDB0011170	22885096					1.20224	1.84	0.66	0.43	1.18		0.6057	0.8754	0.3444	0.8125	0.1924	0.9998	0.213	0.9551	0.5517	0.9942	0.0773	0.8348	0.8088	1		1.3929	1.278	1.5078	1.8125	1.255	1.6746	2.347	1.0022		71	75	67	88	92	100
	655			gamma-glutamylleucine	LC/MS pos early	18369		HMDB0011171	151023					1.29221	1.33	1.25	0.95	1.01		0.2721	0.8076	0.8189	0.8616	0.8059	0.9998	0.3546	0.9708	0.5268	0.9942	0.9891	1	0.7627	1		0.9329	0.9273	0.9385	1.0823	1.056	1.2055	1.2373	1.1736		100	100	100	100	100	100
	656			gamma-glutamyl-alpha-lysine	LC/MS pos early	55015			65254					1.03665	0.71	1.56	1.4	0.64		0.7251	0.8894	0.8125	0.8616	0.7054	0.9998	0.6167	1	0.9845	1	0.9089	0.9953	0.6956	1		1.1842	1.4476	0.9207	1.2343	1.1774	1.2276	1.021	1.4342		100	100	100	100	100	100
	657			gamma-glutamyl-epsilon-lysine	LC/MS pos early	33934		HMDB0003869	7015685					0.725517	0.41	1.09	2.28	0.86		0.1037	0.8076	0.3043	0.8055	0.1866	0.9998	0.0487	0.9488	0.8044	0.9984	0.0659	0.8207	0.842	1		1.113	1.1981	1.0279	0.8454	1.0751	0.8075	0.4928	1.1222		100	100	100	100	92	92
	658			gamma-glutamylmethionine	LC/MS pos early	44872		HMDB0029155	7009567					0.824004	0.74	0.9	1.44	1.18		0.4994	0.8549	0.6535	0.8435	0.4796	0.9998	0.9823	1	0.3177	0.9942	0.8322	0.9938	0.4632	1		1.2273	1.1271	1.3275	0.9779	1.2607	1.0113	0.8287	1.1939		100	100	100	100	67	69
	659			gamma-glutamylphenylalanine	LC/MS neg	33422		HMDB0000594	111299					1.01407	1.36	0.71	0.6	1.15		0.8816	0.9084	0.7544	0.8528	0.3684	0.9998	0.47	0.9912	0.5803	0.9942	0.3295	0.9315	0.7043	1		1.0376	0.965	1.1103	1.1407	0.9491	1.0522	1.3164	0.788		71	50	100	75	92	92
	660			gamma-glutamylthreonine	LC/MS pos early	33364		HMDB0029159	76078708					1.07787	1.46	0.71	0.51	1.04		0.9243	0.9084	0.491	0.8374	0.1377	0.9998	0.3287	0.9708	0.2442	0.9942	0.0854	0.8515	0.5929	1		1.3947	1.3696	1.4198	1.6815	1.2165	1.5033	1.9933	1.0133		100	100	100	100	100	100
	662			gamma-glutamyltyrosine	LC/MS pos early	2734		HMDB0011741	94340					0.887903	1.05	0.71	0.59	0.88		0.5287	0.8664	0.3261	0.8125	0.3034	0.9998	0.7769	1	0.2312	0.9942	0.1126	0.8907	0.9748	1		1.0589	1.1255	0.9923	1.1529	0.8462	0.9402	1.1803	0.7001		100	100	100	100	75	77
	665			gamma-glutamylcitrulline*	LC/MS pos early	62104								0.936634	1.25	0.67	0.63	1.17		0.7664	0.9011	0.5602	0.8374	0.1779	0.9998	0.4578	0.9912	0.2302	0.9942	0.1246	0.9024	0.6114	1		1.1915	1.0965	1.2865	1.2333	1.0742	1.116	1.3702	0.8618		100	100	100	100	67	69
	679		Dipeptide	alanylleucine	LC/MS pos early	37093		HMDB0028691	259583					1.37292	0.51	2.39	3.95	0.85		0.9703	0.9214	0.5282	0.8374	0.102	0.9998	0.2607	0.9708	0.2148	0.9942	0.0723	0.8295	0.498	1		1.1756	1.2743	1.077	0.9633	1.8263	1.614	0.6524	2.5756		100	100	100	100	100	100
	680			alanyllysine	LC/MS pos early	42008		HMDB0028692	4130575					0.638779	0.1	3.71	6.57	0.18		0.9221	0.9084	0.5656	0.8374	0.1534	0.9998	0.2884	0.9708	0.3229	0.9942	0.1111	0.8904	0.5699	1		3.8511	6.552	1.1503	3.6009	2.7102	2.46	0.6498	4.2702		86	75	100	88	100	100
	692			alpha-glutamylglutamate	LC/MS pos early	22166	C01425	HMDB0028818	439500					2.17602	1.62	2.94	1.32	0.73		0.0919	0.8076	0.2821	0.7906	0.487	0.9998	0.4682	0.9912	0.0867	0.9942	0.7496	0.9938	0.2627	1		0.8147	0.9416	0.6878	1.2342	1.3532	1.7728	1.5268	2.0187		100	100	100	100	100	100
	766			cyclo(his-pro)	LC/MS pos early	52353		HMDB0002053	65137;449094					0.4113	0.13	2.24	2.63	0.15		0.3986	0.8361	0.2766	0.7906	0.0248	0.9998	0.0354	0.8938	0.2579	0.9942	0.2911	0.9315	0.0358	1		2.0265	3.5135	0.5394	1.9864	0.8735	0.8335	0.4593	1.2076		100	100	100	100	100	100
	767			cyclo(his-pro) (D,L)*	LC/MS neg	62841								0.40392	0.17	1.68	1.83	0.18		0.1332	0.8076	0.1918	0.7635	0.0158	0.9998	0.0096	0.6867	0.4272	0.9942	0.2956	0.9315	0.02	1		1.6887	2.8529	0.5246	1.6674	0.7035	0.6821	0.4819	0.8824		71	100	33	75	50	54
	810			glutaminylleucine	LC/MS pos early	42994		HMDB0028801	44232492					1.09015	0.69	1.38	2.78	1.39		0.8892	0.9084	0.02	0.525	0.2637	0.9998	0.3849	0.9767	0.4693	0.9942	0.008	0.4184	0.3783	1		0.9595	0.8014	1.1176	0.6776	1.3279	1.046	0.5538	1.5382		100	100	100	100	100	100
	834			glycylisoleucine	LC/MS pos early	36659		HMDB0028844	259613					0.898239	0.63	1.14	2.05	1.12		0.8983	0.9084	0.1882	0.7635	0.1629	0.9998	0.29	0.9708	0.3457	0.9942	0.0356	0.68	0.956	1		0.9198	0.8674	0.9722	0.7049	1.0411	0.8262	0.5424	1.11		100	100	100	100	100	100
	835			glycylleucine	LC/MS pos early	34398	C02155	HMDB0000759	92843					0.84652	0.52	1.33	1.68	0.66		0.4986	0.8549	0.8849	0.8629	0.0355	0.9998	0.0567	0.9488	0.2594	0.9942	0.1014	0.8742	0.1396	1		1.135	1.3657	0.9043	1.0407	1.055	0.9608	0.7158	1.2057		100	100	100	100	100	100
	839			glycylproline	LC/MS pos early	22171		HMDB0000721	3013625					0.991672	1.08	0.91	0.94	1.11		0.7277	0.8894	0.9881	0.8766	0.6915	0.9998	0.9731	1	0.5881	0.9942	0.739	0.9938	0.8077	1		1.2848	1.2196	1.35	1.2677	1.2912	1.2741	1.3157	1.2325		100	100	100	100	100	100
	845			glycylvaline	LC/MS pos early	18357		HMDB0028854	2724807					0.902758	0.61	1.32	1.54	0.71		0.6222	0.8754	0.9993	0.8793	0.0508	0.9998	0.0914	0.9488	0.2581	0.9942	0.107	0.8759	0.1981	1		0.9862	1.1543	0.8181	0.928	0.9486	0.8903	0.7017	1.079		100	100	100	100	100	100
	850			histidylalanine	LC/MS neg	42027		HMDB0028878	101180					1.14317	0.88	1.41	1.58	0.98		0.9571	0.9211	0.661	0.8444	0.6411	0.9998	0.7205	1	0.7632	0.9984	0.4668	0.9315	0.9858	1		0.6761	0.682	0.6702	0.6408	0.8081	0.7729	0.5996	0.9461		71	75	67	50	58	46
	869			isoleucylglycine	LC/MS neg	40008		HMDB0028907	342532					0.827186	0.71	0.97	1.21	0.88		0.2455	0.8076	0.7668	0.8572	0.3711	0.9998	0.1634	0.9488	0.8379	0.9984	0.3378	0.9315	0.6991	1		1.1469	1.2201	1.0737	1.0403	1.0553	0.9487	0.8604	1.0369		100	100	100	100	100	100
	883			leucylalanine	LC/MS neg	40010		HMDB0028922	81721					1.25612	1.09	1.4	1.53	1.19		0.7524	0.8961	0.587	0.8374	0.8981	0.9998	0.8973	1	0.7467	0.9984	0.5877	0.9599	0.7907	1		1.1592	1.0605	1.2578	1.1068	1.5085	1.4561	1.153	1.7593		86	75	100	88	100	100
	888			leucylglycine	LC/MS neg	40045		HMDB0028929	79070					0.859693	0.5	1.31	2.08	0.8		0.413	0.8361	0.6036	0.8374	0.2899	0.9998	0.2023	0.9488	0.8554	0.9984	0.2076	0.9315	0.724	1		1.3499	1.5019	1.1979	1.1272	1.3832	1.1605	0.7525	1.5686		100	100	100	100	100	100
	901			lysylalanine	LC/MS pos early	42006		HMDB0028944	4106167					1.05103	0.28	1.9	6.29	0.91		0.8795	0.9084	0.1987	0.7637	0.0108	0.9998	0.0531	0.9488	0.0638	0.9942	0.0035	0.364	0.3403	1		0.8269	0.8639	0.7899	0.5511	1.1449	0.8691	0.2383	1.5		86	100	67	88	92	92
	908			lysylleucine	LC/MS pos early	40020		HMDB0028955	4682588					1.45403	0.46	5.78	2.84	0.23		0.5131	0.8612	0.4313	0.8374	0.0198	0.9998	0.2057	0.9488	0.0304	0.9942	0.1691	0.9157	0.0462	1		0.6396	1.0413	0.2379	0.7626	0.807	0.93	0.4839	1.3761		71	100	33	88	58	69
	937			phenylalanylalanine	LC/MS pos early	41374		HMDB0028988	5488196					1.13167	0.56	1.9	2.48	0.73		0.8975	0.9084	0.4036	0.8374	0.245	0.9998	0.4704	0.9912	0.3441	0.9942	0.1145	0.8907	0.8271	1		1.0473	1.2077	0.887	0.9447	1.2878	1.1852	0.6817	1.6886		86	75	100	88	100	100
	942			phenylalanylglycine	LC/MS pos early	41370		HMDB0028995	6992304					1.2636	0.59	2.29	2.58	0.66		0.9436	0.9169	0.5162	0.8374	0.0559	0.9998	0.1906	0.9488	0.1396	0.9942	0.0426	0.684	0.3873	1		0.9488	1.1419	0.7558	0.9062	1.2415	1.1989	0.6705	1.7273		100	100	100	100	100	100
	957			prolylalanine	LC/MS pos early	40705		HMDB0029010	6347578					0.70647	0.39	1.76	1.39	0.3		0.7929	0.9065	0.8658	0.8629	0.54	0.9998	0.8082	1	0.5242	0.9942	0.7181	0.9938	0.6186	1		2.0233	3.1053	0.9413	2.1515	1.3012	1.4294	1.1977	1.661		100	100	100	100	100	100
	963			prolylglycine	LC/MS pos early	40703		HMDB0011178	6426709					1.18728	1.09	1.3	1.05	0.88		0.718	0.8894	0.7714	0.8572	0.9319	0.9998	0.7589	1	0.8404	0.9984	0.868	0.9938	0.8109	1		0.9873	1.0492	0.9253	1.0976	1.0618	1.1722	1.146	1.1984		86	75	100	75	75	69
	969			prolylproline	LC/MS pos early	40731		HMDB0011180	263469					1.07451	0.9	1.25	1.36	0.98		0.6271	0.8754	0.4785	0.8374	0.5749	0.9998	0.4736	0.9912	0.9558	1	0.903	0.9953	0.4209	1		0.9717	0.981	0.9624	0.9333	1.0825	1.0441	0.8856	1.2026		100	100	100	100	92	92
	1002			threonylphenylalanine	LC/MS neg	31530		HMDB0029068	7010580					1.1126	0.73	1.49	2.09	1.02		0.8262	0.9084	0.5643	0.8374	0.2461	0.9998	0.3413	0.9708	0.4849	0.9942	0.1665	0.9157	0.7006	1		0.9183	0.9094	0.9271	0.7852	1.1548	1.0217	0.6609	1.3825		100	100	100	100	100	100
	1014			tryptophylglycine	LC/MS pos early	43028		HMDB0029083	263471					1.2904	0.65	2.25	2.31	0.67		0.4903	0.8549	0.4692	0.8374	0.6218	0.9998	0.8908	1	0.3912	0.9942	0.3293	0.9315	0.8814	1		0.9728	1.1669	0.7788	0.963	1.2652	1.2553	0.7592	1.7515		71	50	100	75	100	100
	1032			tyrosylglycine	LC/MS neg	41375		HMDB0029105	7021854					0.746128	0.33	1.91	2.08	0.36		0.8015	0.9084	0.798	0.861	0.1392	0.9998	0.231	0.9643	0.3571	0.9942	0.1612	0.9157	0.4217	1		1.3302	1.9599	0.7006	1.3018	1.021	0.9925	0.6437	1.3413		71	75	67	50	83	69
	1049			valylglutamine	LC/MS pos early	42079		HMDB0029125	5253209					1.02433	0.44	2.55	2.26	0.39		0.9934	0.9214	0.9273	0.8658	0.0393	0.9998	0.1411	0.9488	0.1227	0.9942	0.1011	0.8742	0.1565	1		1.1344	1.6379	0.631	1.1755	1.121	1.162	0.7131	1.6109		100	100	100	100	100	100
	1050			valylglycine	LC/MS neg	40475		HMDB0029127	136487					0.8407	0.6	1.19	1.33	0.68		0.3441	0.8101	0.8138	0.8616	0.1871	0.9998	0.1254	0.9488	0.7726	0.9984	0.3709	0.9315	0.3187	1		1.1651	1.3907	0.9396	1.1152	1.0294	0.9795	0.8398	1.1191		100	100	100	100	100	100
	1053			valylleucine	LC/MS pos early	39994		HMDB0029131	352039					1.05383	0.71	1.4	1.95	0.98		0.7984	0.9084	0.3956	0.8317	0.164	0.9998	0.2549	0.9708	0.3952	0.9942	0.0777	0.8348	0.7144	1		1.0329	1.0412	1.0247	0.8901	1.2313	1.0885	0.739	1.4379		100	100	100	100	100	100
	1063			leucylglutamine*	LC/MS neg	53061		HMDB0028927	4305457					1.01016	0.71	1.23	2.37	1.37		0.8554	0.9084	0.0594	0.6338	0.391	0.9998	0.4741	0.9912	0.6187	0.9942	0.0317	0.678	0.4758	1		1.0332	0.8705	1.1959	0.745	1.3319	1.0437	0.6195	1.4679		100	100	100	100	100	100
	1099		Polypeptide	ala-ile-ala	LC/MS neg	64506			18218408					0.723349	0.73	0.72	1.52	1.53		0.3695	0.8298	0.1198	0.6985	0.8233	0.9998	0.4408	0.9908	0.6187	0.9942	0.15	0.9157	0.3809	1		1.3414	1.0602	1.6227	0.9157	1.3961	0.9703	0.7713	1.1694		86	75	100	88	100	100
	1100			ala-leu-ala	LC/MS neg	64505			23080784					0.987254	0.65	1.2	2.86	1.55		0.8134	0.9084	0.0374	0.5433	0.3539	0.9998	0.4237	0.9855	0.6096	0.9942	0.0191	0.5635	0.4151	1		1.1141	0.8721	1.356	0.7213	1.4927	1.0999	0.5704	1.6293		100	100	100	88	100	92
	1150			val-val-ala	LC/MS neg	64508			18232571					0.815818	0.86	0.79	1.71	1.84		0.3258	0.8076	0.0798	0.6739	0.8514	0.9998	0.5794	0.9954	0.3931	0.9942	0.1931	0.9315	0.2083	1		1.1809	0.8305	1.5312	0.7706	1.3736	0.9634	0.7107	1.216		100	100	100	100	92	92
	1204		Acetylated Peptides	phenylacetylglutamine	LC/MS neg	35126	C04148	HMDB0006344	92258					0.117234	0.06	1.08	1.05	0.06		0.2308	0.8076	0.2066	0.7692	0.1839	0.9998	0.089	0.9488	0.9183	1	0.954	1	0.1045	1		5.5948	10.5691	0.6205	5.6048	0.6459	0.6559	0.6405	0.6713		29	50	0	38	17	23
	1214			phenylacetyltaurine	LC/MS neg	63154			2179693					1.23951	1.47	1.14	1.75	2.26		0.7842	0.9061	0.3661	0.82	0.553	0.9998	0.5518	0.9954	0.8144	0.9984	0.7966	0.9938	0.343	1		0.6722	0.4127	0.9316	0.509	0.9964	0.8332	0.6053	1.0612		43	25	67	38	33	31
	1219		Modified Peptides	pyroglutamylalanine*	LC/MS neg	62087			159907					1.29285	0.66	1.88	3.03	1.07		0.8728	0.9084	0.1708	0.7407	0.4367	0.9998	0.6684	1	0.4939	0.9942	0.09	0.8655	0.691	1		1.2293	1.1895	1.2691	0.9895	1.8292	1.5893	0.7894	2.3893		86	75	100	88	100	100
	1235			pyroglutamylvaline	LC/MS neg	32394			152416					1.0805	1.26	0.97	1.3	1.69		0.498	0.8549	0.0253	0.525	0.5071	0.9998	0.3598	0.9721	0.9915	1	0.1676	0.9157	0.0627	1		0.9826	0.7308	1.2343	0.8267	1.2176	1.0617	0.9225	1.2008		100	100	100	100	100	100
	1236			N,N-dimethyl-pro-pro	LC/MS pos early	64571								1.83622	0.58	3.18	5.1	0.93		0.9137	0.9084	0.4487	0.8374	0.3408	0.9998	0.5576	0.9954	0.4378	0.9942	0.1743	0.9254	0.8978	1		0.624	0.6461	0.6019	0.5109	1.2589	1.1458	0.3758	1.9159		57	50	67	50	50	46
	1240	Carbohydrate	Glycolysis, Gluconeogenesis, and Pyruvate Metabolism	glucose	LC/MS polar	48152	C00031	HMDB0000122	5793					1.09845	1.47	0.97	1.9	2.87		0.7366	0.8894	0.3549	0.8125	0.8103	0.9998	0.6923	1	0.9439	1	0.5746	0.9599	0.4575	1		1.4322	0.7397	2.1248	0.9122	2.0933	1.5732	1.0847	2.0618		100	100	100	100	100	100
	1241			glucose 6-phosphate	LC/MS polar	31260	C00092	HMDB0001401	5958					2.13665	0.85	3.98	3.24	0.7		0.9618	0.9214	0.8243	0.8616	0.6264	0.9998	0.7624	1	0.6965	0.9942	0.5675	0.9591	0.8655	1		0.7157	0.8438	0.5876	0.7822	1.4626	1.5292	0.7207	2.3376		57	50	67	63	50	54
	1256			pyruvate	LC/MS polar	22250	C00022	HMDB0000243	1060					1.38971	1.28	1.48	1.37	1.18		0.3505	0.8101	0.4527	0.8374	0.7143	0.9998	0.3728	0.9745	0.6734	0.9942	0.7523	0.9938	0.4779	1		0.8922	0.8186	0.9657	0.9335	1.1985	1.2399	1.0485	1.4313		100	100	100	100	100	100
	1257			lactate	LC/MS polar	527	C00186	HMDB0000190	612					1.04415	0.73	1.46	1.51	0.76		0.5203	0.8621	0.5957	0.8374	0.6333	0.9998	0.4434	0.9908	0.9024	0.9991	0.965	1	0.5225	1		1.3273	1.5114	1.1433	1.3084	1.4048	1.3859	1.1055	1.6664		100	100	100	100	100	100
	1260			glycerate	LC/MS polar	1572	C00258	HMDB0006372 HMDB0000139	752;439194					1.09271	1.23	1	1.15	1.42		0.6945	0.8894	0.5999	0.8374	0.6355	0.9998	0.5525	0.9954	0.9524	1	0.9669	1	0.5262	1		1.1207	0.9279	1.3136	1.0341	1.3112	1.2246	1.1404	1.3088		100	100	100	100	100	100
	1278		Pentose Metabolism	ribose	LC/MS polar	1471	C00121	HMDB0000283	5779					1.46372	1.34	1.63	0.9	0.74		0.8509	0.9084	0.4954	0.8374	0.8857	0.9998	0.9757	1	0.809	0.9984	0.6615	0.9808	0.5988	1		0.882	1.0119	0.7521	1.1839	0.9891	1.291	1.3559	1.2261		57	75	33	50	25	23
	1279			ribitol	LC/MS polar	15772	C00532 C01904 C00474 C00379	HMDB0002917 HMDB0000508 HMDB0001851 HMDB0000568	6912					0.455972	0.53	0.4	0.99	1.32		0.1415	0.8076	0.8686	0.8629	0.7437	0.9998	0.4164	0.9826	0.1897	0.9942	0.8958	0.9953	0.7542	1		2.2679	1.9572	2.5786	1.4978	1.8042	1.0341	1.0384	1.0299		100	100	100	100	92	92
	1280			ribonate	LC/MS polar	27731	C01685	HMDB0000867	5460677					0.605991	0.2	2.12	2.88	0.27		0.7605	0.8972	0.9475	0.8674	0.3754	0.9998	0.4134	0.9826	0.6668	0.9942	0.4403	0.9315	0.5983	1		2.5738	4.0572	1.0905	2.4305	1.703	1.5597	0.8038	2.3155		100	100	100	100	100	100
	1281			ribulose/xylulose	LC/MS polar	48340		HMDB0000621 HMDB0000751 HMDB0001644 HMDB0003371	151261;5289590					0.783742	1.14	0.65	1.58	2.76		0.8639	0.9084	0.2983	0.8055	0.6387	0.9998	0.837	1	0.6406	0.9942	0.6361	0.9775	0.3376	1		1.3729	0.7307	2.0151	0.7816	1.6672	1.076	0.8325	1.3194		86	75	100	75	92	85
	1284			xylose	LC/MS polar	15581	C00181	HMDB0000098	135191					0.536222	0.58	0.5	1.26	1.45		0.5406	0.8694	0.3858	0.8298	0.6709	0.9998	0.8964	1	0.4518	0.9942	0.7155	0.9938	0.4119	1		1.5557	1.2692	1.8422	1.0038	1.3861	0.8342	0.7384	0.93		71	50	100	75	92	92
	1286			arabinose	LC/MS polar	575	C00216	HMDB0029942	66308					1.34181	1.57	1.23	1.69	2.16		0.4278	0.8361	0.2759	0.7906	0.4788	0.9998	0.306	0.9708	0.9494	1	0.7488	0.9938	0.2556	1		1.0661	0.6752	1.457	0.869	1.6276	1.4305	1.0628	1.7983		86	75	100	88	92	92
	1294			arabitol/xylitol	LC/MS polar	48885	C00542 C01904 C00379	HMDB0002917 HMDB0001851 HMDB0000568	6912;94154					1.58043	1.52	1.65	1.06	0.98		0.4706	0.8485	0.9985	0.8793	0.8963	0.9998	0.5577	0.9954	0.6644	0.9942	0.9149	0.9953	0.9348	1		0.8883	0.8984	0.8783	1.1306	1.1617	1.4039	1.3628	1.445		100	100	100	100	100	100
	1300			arabonate/xylonate	LC/MS polar	48255	C00502 C05411	HMDB0000539	122045;6602431					0.859649	0.44	1.72	1.94	0.49		0.917	0.9084	0.8775	0.8629	0.3587	0.9998	0.5722	0.9954	0.4548	0.9942	0.3862	0.9315	0.6228	1		1.4649	1.9658	0.9641	1.4113	1.3129	1.2593	0.8567	1.6618		100	100	100	100	100	100
	1305			sedoheptulose	LC/MS polar	53237	C02076	HMDB0003219	5459879					0.834875	0.6	1.13	1.46	0.78		0.5182	0.8612	0.3405	0.8125	0.5235	0.9998	0.3803	0.9767	0.9951	1	0.2048	0.9315	0.8362	1		1.4268	1.6067	1.2469	1.2883	1.3296	1.1912	0.97	1.4123		100	100	100	100	100	100
	1307			lyxonate	LC/MS polar	61858		HMDB0060255						0.56015	0.21	1.47	2.65	0.38		0.1795	0.8076	0.9939	0.8784	0.1332	0.9998	0.0569	0.9488	0.8982	0.9991	0.2212	0.9315	0.3268	1		1.7656	2.5521	0.9791	1.5472	1.2073	0.989	0.5424	1.4356		100	100	100	100	100	100
	1312		Glycogen Metabolism	maltotetraose	LC/MS polar	15910	C02052	HMDB0001296	439639					2.49091	1.42	3.23	3.27	1.44		0.3441	0.8101	0.3459	0.8125	0.595	0.9998	0.7701	1	0.2851	0.9942	0.2387	0.9315	0.7885	1		0.3742	0.3071	0.4414	0.372	0.9344	0.9321	0.4369	1.4274		43	25	67	38	58	54
	1314			maltotriose	LC/MS polar	44688	C01835	HMDB0001262	439586					0.807597	0.74	0.85	2.09	1.82		0.7339	0.8894	0.2217	0.7692	0.533	0.9998	0.8439	1	0.4839	0.9942	0.615	0.9649	0.2422	1		2.1403	1.5191	2.7616	1.3194	2.5495	1.7285	1.1197	2.3374		86	75	100	88	100	100
	1317			maltose	LC/MS polar	15586	C00208	HMDB0000163	10991489					0.69472	0.97	0.62	2.23	3.5		0.8092	0.9084	0.4132	0.8374	0.7471	0.9998	0.9554	1	0.6815	0.9942	0.6844	0.9816	0.4681	1		2.557	1.1352	3.9788	1.1175	3.2159	1.7764	1.0997	2.453		86	100	67	88	92	92
	1329		Disaccharides and Oligosaccharides	lactobionate	LC/MS neg	20685			7314					0.773788	0.47	1.14	2.02	0.83		0.8086	0.9084	0.2535	0.7692	0.9388	0.9998	0.8265	1	0.9039	0.9991	0.3225	0.9315	0.4915	1		1.2895	1.4122	1.1667	1.0367	1.2506	0.9978	0.6612	1.3344		86	75	100	75	92	85
	1343			sucrose	LC/MS neg	1519	C00089	HMDB0000258	5988					1.33868	0.35	5.46	3.77	0.24		0.6477	0.8813	0.9874	0.8766	0.4254	0.9998	0.8117	1	0.3634	0.9942	0.5097	0.9438	0.6169	1		2.2275	3.5914	0.8637	2.4204	2.789	2.9819	1.2494	4.7144		100	100	100	88	92	85
	1359			maltitol/lactitol/cellobiotol/palatinol	LC/MS neg	57379								27.2891	0.1	281.65	287.42	0.11		0.8742	0.9084	0.8903	0.8629	0.1966	0.9998	0.3153	0.9708	0.3998	0.9942	0.3434	0.9315	0.358	1		1.0067	1.8191	0.1944	1.0048	27.4738	27.4719	0.1905	54.7533		43	50	33	38	33	31
	1364		Fructose, Mannose and Galactose Metabolism	fructose	LC/MS polar	48195	C00095	HMDB0000660	2723872					1.30236	0.96	1.72	1.45	0.81		0.5452	0.8716	0.7489	0.8527	0.6206	0.9998	0.9389	1	0.4251	0.9942	0.8866	0.9953	0.6045	1		1.0676	1.178	0.9572	1.1559	1.3021	1.3904	1.1339	1.6469		100	100	100	100	100	100
	1369			mannitol/sorbitol	LC/MS polar	46142	C00392 C00794	HMDB0000247 HMDB0000765	6251;5780					1.28095	0.63	2.13	2.57	0.76		0.4115	0.8361	0.8763	0.8629	0.4345	0.9998	0.9776	1	0.248	0.9942	0.449	0.9315	0.6877	1		1.428	1.622	1.234	1.3238	1.9335	1.8292	1.0255	2.633		100	100	100	100	100	100
	1370			mannose	LC/MS polar	48153	C00159 C02209 C00936	HMDB0000169	185698;82308;18950;439680					1.12299	1.05	1.16	2.4	2.18		0.6723	0.889	0.2498	0.7692	0.9235	0.9998	0.8217	1	0.7052	0.9942	0.3117	0.9315	0.4953	1		1.183	0.7441	1.622	0.7624	1.7491	1.3285	0.7808	1.8762		86	75	100	88	100	100
	1390			galactonate	LC/MS polar	27719	C15930 C00880	HMDB0000565	12310779;128869					1.35929	1.46	1.32	2.29	2.54		0.8104	0.9084	0.1719	0.7407	0.5997	0.9998	0.5996	0.9981	0.8345	0.9984	0.4797	0.9385	0.2291	1		1.1648	0.6583	1.6712	0.8107	1.9373	1.5833	0.9631	2.2035		100	100	100	100	100	100
	1417		Aminosugar Metabolism	fucose	LC/MS pos early	15587	C01019 C01018	HMDB0000174 HMDB0029196	19466;17106					0.669604	0.92	0.51	0.9	1.62		0.0924	0.8076	0.5127	0.8374	0.1912	0.9998	0.7739	1	0.0353	0.9942	0.5818	0.9599	0.2139	1		1.4979	1.1435	1.8523	1.0989	1.402	1.003	1.0542	0.9517		100	100	100	100	100	100
	1421			glucosamine 6-sulfate	LC/MS polar	21296		HMDB0000592	72361					0.83736	0.87	0.81	1.14	1.21		0.2618	0.8076	0.3141	0.8084	0.8881	0.9998	0.4933	0.9912	0.3552	0.9942	0.4791	0.9385	0.4629	1		0.7864	0.7121	0.8606	0.6641	0.7807	0.6585	0.6161	0.7008		29	25	33	13	33	23
	1424			glucuronate	LC/MS neg	15443	C16245	HMDB0000127	441478;94715;23677976;65041;444791					1.03333	1.29	0.96	2.4	3.23		0.8882	0.9084	0.165	0.7336	0.3281	0.9998	0.5601	0.9954	0.4136	0.9942	0.723	0.9938	0.1366	1		1.6382	0.7737	2.5028	0.8844	2.4466	1.6928	0.9952	2.3905		100	100	100	100	100	100
	1426			diacetylchitobiose	LC/MS pos early	35158	C01674	HMDB0003556	439544					0.61026	0.38	0.87	1.98	0.88		0.3894	0.8361	0.7758	0.8572	0.6152	0.9998	0.3512	0.9708	0.7897	0.9984	0.5257	0.9484	0.889	1		1.1423	1.216	1.0687	0.8419	0.9975	0.6971	0.4677	0.9264		71	50	100	50	58	46
	1436			N-acetylneuraminate	LC/MS pos early	32377	C00270	HMDB0000230	439197					0.362304	0.4	0.34	1.76	2.05		0.0524	0.8076	0.1733	0.7407	0.8838	0.9998	0.1996	0.9488	0.1215	0.9942	0.3172	0.9315	0.3316	1		2.7154	1.7825	3.6483	1.2478	2.4514	0.9838	0.713	1.2545		100	100	100	100	100	100
	1439			N-acetyl-beta-glucosaminylamine	LC/MS neg	35469	C01239	HMDB01104	439454					0.907087	0.97	0.86	1.2	1.34		0.6014	0.8754	0.3836	0.8298	0.9027	0.9998	0.6577	1	0.7696	0.9984	0.4216	0.9315	0.6301	1		1.143	0.9775	1.3085	0.9606	1.2192	1.0368	0.9438	1.1298		100	100	100	100	100	100
	1440			N-acetylmuramate	LC/MS neg	18354	C02713	HMDB0060493	5462244					0.644004	1.12	0.35	0.5	1.6		0.6	0.8754	0.7724	0.8572	0.0821	0.9998	0.3778	0.9767	0.1007	0.9942	0.1014	0.8742	0.3355	1		1.893	1.456	2.3299	1.5417	1.5704	1.2191	1.6274	0.8108		100	100	100	100	100	100
	1448			N-acetylglucosaminylasparagine	LC/MS pos early	48149	C04540	HMDB0000489	123826					1.11895	1.53	0.88	0.98	1.71		0.5999	0.8754	0.4196	0.8374	0.1704	0.9998	0.1944	0.9488	0.5209	0.9942	0.6301	0.9747	0.169	1		0.9752	0.7205	1.2298	0.9116	1.1547	1.0912	1.1027	1.0797		100	100	100	100	100	100
	1449			erythronate*	LC/MS polar	42420		HMDB0000613	2781043					1.42496	1.39	1.46	1.14	1.08		0.322	0.8076	0.8138	0.8616	0.867	0.9998	0.5665	0.9954	0.3977	0.9942	0.9561	1	0.7977	1		0.8949	0.8601	0.9297	1.0273	1.1428	1.2752	1.1944	1.356		100	100	100	100	100	100
	1451			N-acetylglucosamine/N-acetylgalactosamine	LC/MS pos early	46539	C01074	HMDB0000212 HMDB0000215	84265;439174					0.475447	0.52	0.45	1.53	1.78		0.1841	0.8076	0.2508	0.7692	0.6956	0.9998	0.5062	0.9912	0.2113	0.9942	0.5304	0.9484	0.3268	1		2.183	1.5707	2.7954	1.1962	2.0248	1.0379	0.8217	1.2542		100	100	100	100	100	100
	1452			N-glycolylneuraminate	LC/MS pos early	37123	C03410	HMDB0000833	123802					1.43213	1.29	1.67	0.76	0.59		0.6006	0.8754	0.4416	0.8374	0.5708	0.9998	0.9759	1	0.4292	0.9942	0.8671	0.9938	0.3971	1		0.5223	0.6564	0.3882	0.7522	0.5181	0.748	0.848	0.6479		43	50	33	38	42	38
	1453		Advanced Glycation End-product	N6-carboxymethyllysine	LC/MS pos early	36713		HMDB0240347	123800					1.97624	1.18	3.23	1.75	0.64		0.2232	0.8076	0.9239	0.865	0.2052	0.9998	0.9712	1	0.0776	0.9942	0.3372	0.9315	0.3805	1		0.8418	1.0291	0.6545	1.12	1.3855	1.6636	1.2108	2.1164		100	100	100	100	100	100
	1457	Energy	TCA Cycle	citrate	LC/MS neg	1564	C00158	HMDB0000094	311					2.67428	2.76	2.58	0.88	0.94		0.4471	0.839	0.9147	0.8629	0.8338	0.9998	0.7024	1	0.4798	0.9942	0.7978	0.9938	0.9478	1		0.7052	0.7277	0.6827	1.3694	1.2217	1.8859	2.0111	1.7607		100	100	100	100	100	100
	1459			aconitate [cis or trans]	LC/MS neg	46173	C02341 C004174	HMDB0000958 HMDB000072	643757;444212					2.35323	2.09	2.62	1.24	0.98		0.1144	0.8076	0.6738	0.847	0.6321	0.9998	0.4287	0.9855	0.1353	0.9942	0.4692	0.9315	0.9703	1		0.7808	0.7869	0.7747	1.215	1.4032	1.8374	1.6431	2.0317		71	75	67	63	83	77
	1462			isocitric lactone	LC/MS polar	54724			98259					16.2207	37.32	1.61	0.06	1.44		0.337	0.8101	0.8417	0.8629	0.5152	0.9998	0.272	0.9708	0.8161	0.9984	0.4926	0.9385	0.7723	1		0.672	0.55	0.794	10.5381	1.0342	10.9003	20.5262	1.2745		57	50	67	63	67	69
	1463			alpha-ketoglutarate	LC/MS neg	528	C00026	HMDB0000208	51					0.671941	0.46	0.9	1.82	0.92		0.105	0.8076	0.4027	0.8374	0.2955	0.9998	0.0723	0.9488	0.6488	0.9942	0.1361	0.9157	0.8896	1		1.5104	1.5708	1.4499	1.1453	1.38	1.0149	0.7198	1.31		100	100	100	100	100	100
	1465			succinylcarnitine (C4-DC)	LC/MS pos early	37058		HMDB0061717	71464481					1.6394	2.24	1.3	1.03	1.78		0.0687	0.8076	0.18	0.7446	0.2511	0.9998	0.0463	0.9488	0.5866	0.9942	0.8664	0.9938	0.1185	1		0.7726	0.5566	0.9887	0.9011	1.1381	1.2666	1.2457	1.2875		71	50	100	75	92	92
	1466			succinate	LC/MS polar	1437	C00042	HMDB0000254	1110					1.1426	1.46	0.94	0.97	1.52		0.8659	0.9084	0.5629	0.8374	0.3227	0.9998	0.4247	0.9855	0.5449	0.9942	0.7328	0.9938	0.3206	1		0.9586	0.7622	1.1551	0.9358	1.1182	1.0953	1.1095	1.0812		100	100	100	100	100	100
	1467			fumarate	LC/MS polar	1643	C00122	HMDB0000134	444972					1.149	1.89	0.75	0.72	1.83		0.8831	0.9084	0.523	0.8374	0.1176	0.9998	0.233	0.9643	0.2889	0.9942	0.43	0.9315	0.1615	1		1.0772	0.7617	1.3927	1.0996	1.2154	1.2377	1.4374	1.0381		100	100	100	100	100	100
	1469			malate	LC/MS neg	1303	C00497 C00149 C00711	HMDB0000744 HMDB0031518 HMDB0000156	525					1.80879	2.42	1.41	0.9	1.53		0.1637	0.8076	0.6605	0.8444	0.5415	0.9998	0.1714	0.9488	0.5509	0.9942	0.8884	0.9953	0.5053	1		0.8415	0.6642	1.0188	1.1353	1.2283	1.5221	1.6063	1.4379		100	100	100	100	100	100
	1473			itaconate	LC/MS polar	18373	C00490	HMDB0002092	811					0.844961	0.35	2.63	2.12	0.28		0.8283	0.9084	0.9131	0.8629	0.2697	0.9998	0.5349	0.9954	0.335	0.9942	0.416	0.9315	0.4366	1		1.5409	2.4086	0.6733	1.6213	1.2217	1.302	0.834	1.77		57	50	67	50	75	69
	1474			tricarballylate	LC/MS polar	15729	C19806	HMDB0031193	14925					1.3835	2.44	0.89	0.79	2.16		0.6628	0.8857	0.3577	0.8142	0.4703	0.9998	0.4279	0.9855	0.8323	0.9984	0.8689	0.9938	0.2992	1		0.994	0.6291	1.3589	1.0823	1.2869	1.3752	1.5355	1.2149		100	100	100	100	100	100
	1478			2-methylcitrate/homocitrate	LC/MS neg	52282	C01251	HMDB0003518 HMDB0000379	515;439459					1.29917	1.07	1.64	1.06	0.69		0.8161	0.9084	0.5687	0.8374	0.8529	0.9998	0.9741	1	0.7607	0.9984	0.7545	0.9938	0.6306	1		0.9543	1.1292	0.7794	1.1664	1.0276	1.2398	1.2037	1.2758		100	100	100	100	100	100
	1480			citraconate/glutaconate	LC/MS polar	47076	C02226 C02214	HMDB0000620 HMDB0000634	643798;5280498					1.00074	0.61	2.08	1.22	0.36		0.8611	0.9084	0.353	0.8125	0.4687	0.9998	0.7032	1	0.512	0.9942	0.8645	0.9938	0.2958	1		1.4895	2.1911	0.7879	1.7675	1.2127	1.4906	1.3438	1.6374		100	100	100	100	100	100
	1482			carboxysuccinate	LC/MS polar	63258			313489					1.3472	1.29	1.42	0.91	0.83		0.1915	0.8076	0.7393	0.8527	0.7569	0.9998	0.4815	0.9912	0.2388	0.9942	0.985	1	0.6831	1		0.8655	0.9473	0.7836	1.0839	0.9476	1.166	1.2205	1.1115		100	100	100	100	100	100
	1486		Oxidative Phosphorylation	phosphate	LC/MS pos early	42109	C00009	HMDB0001429	1061					1.28342	3.12	0.82	1.04	3.95		0.7889	0.9063	0.0996	0.6985	0.5438	0.9998	0.814	1	0.5246	0.9942	0.3753	0.9315	0.1513	1		2.0517	0.8286	3.2748	1.7067	2.9782	2.6332	2.5849	2.6815		100	100	100	100	100	100
	1490	Lipid	Fatty Acid Synthesis	malonate	LC/MS polar	15872	C00383	HMDB0000691	867					1.66832	2.22	0.96	0.33	0.77		0.3811	0.8361	0.1845	0.7555	0.2556	0.9998	0.1722	0.9488	0.8418	0.9984	0.0545	0.7632	0.8965	1		1.1508	1.2998	1.0018	2.0905	0.9802	1.9199	2.8812	0.9587		100	100	100	100	100	100
	1504		Fatty Acid Metabolism	N-oleoylalanine	LC/MS neg	63890			44423663					1.15167	0.58	2.15	2.11	0.57		0.9129	0.9084	0.9616	0.8698	0.261	0.9998	0.4793	0.9912	0.366	0.9942	0.3408	0.9315	0.4878	1		0.3435	0.4373	0.2497	0.346	0.3931	0.3956	0.2548	0.5364		14	25	0	38	17	31
	1505		Short Chain Fatty Acid	butyrate/isobutyrate (4:0)	LC/MS neg	40605	C00246	HMDB0000039	264					0.634718	0.41	1.2	1.2	0.41		0.3203	0.8076	0.9437	0.8674	0.4419	0.9998	0.2305	0.9643	0.865	0.9984	0.5702	0.9591	0.5917	1		2.1983	3.1251	1.2715	2.1974	1.3963	1.3953	1.2697	1.521		100	100	100	100	100	100
	1506			valerate (5:0)	LC/MS neg	33443	C00803	HMDB0000892	7991					0.805644	0.59	1.13	1.28	0.67		0.393	0.8361	0.8234	0.8616	0.6354	0.9998	0.3635	0.9721	0.7774	0.9984	0.5738	0.9599	0.8724	1		1.3892	1.6628	1.1155	1.3221	1.1862	1.1192	0.9814	1.2569		100	100	100	100	100	100
	1511		Medium Chain Fatty Acid	caproate (6:0)	LC/MS neg	32489	C01585	HMDB0000535	8892					1.69787	1.4	1.87	2.28	1.71		0.7426	0.8932	0.4028	0.8374	0.7052	0.9998	0.9725	1	0.6073	0.9942	0.3292	0.9315	0.7667	1		1.6599	1.2264	2.0934	1.4731	3.0051	2.8183	1.7198	3.9168		100	100	100	100	100	100
	1512			heptanoate (7:0)	LC/MS neg	1644	C17714	HMDB0000666	8094					2.82847	4.74	2.21	1.43	3.08		0.5301	0.8664	0.4615	0.8374	0.9083	0.9998	0.6092	0.9981	0.7071	0.9942	0.6132	0.9644	0.5869	1		2.0539	1.0076	3.1003	2.8923	4.971	5.8094	4.777	6.8418		100	100	100	100	100	100
	1513			caprylate (8:0)	LC/MS neg	32492	C06423	HMDB0000482	379					8.25217	3.15	13.76	4.04	0.93		0.292	0.8076	0.8447	0.8629	0.7829	0.9998	0.5857	0.9971	0.3329	0.9942	0.7035	0.9938	0.9595	1		0.8883	0.9227	0.8539	1.9167	6.302	7.3304	2.9106	11.7501		100	100	100	100	100	100
	1514			pelargonate (9:0)	LC/MS neg	12035	C01601	HMDB0000847	8158					1.22612	1.04	1.53	0.87	0.6		0.2322	0.8076	0.3835	0.8298	0.7168	0.9998	0.5571	0.9954	0.2575	0.9942	0.6758	0.9808	0.4327	1		0.9212	1.1549	0.6875	1.1801	0.8707	1.1295	1.2052	1.0539		100	100	100	100	100	100
	1516			caprate (10:0)	LC/MS neg	1642	C01571	HMDB0000511	2969					9.68062	2.91	17.66	5.16	0.85		0.6815	0.8894	0.9075	0.8629	0.6511	0.9998	0.9768	1	0.5309	0.9942	0.7852	0.9938	0.7175	1		1.3429	1.4526	1.2332	2.8363	11.5067	13.0001	4.22	21.7801		100	100	100	100	100	100
	1521			undecanoate (11:0)	LC/MS neg	12067	C17715	HMDB0000947	8180					1.33755	0.93	2	1.32	0.61		0.889	0.9084	0.7878	0.8604	0.7167	0.9998	0.73	1	0.8703	0.9984	0.9393	0.9974	0.6879	1		1.5002	1.8586	1.1418	1.7928	1.714	2.0066	1.727	2.2862		100	100	100	100	100	100
	1522			10-undecenoate (11:1n1)	LC/MS neg	32497	C13910	HMDB0033724	14891					1.39754	1.97	1.07	0.97	1.78		0.2544	0.8076	0.5469	0.8374	0.2385	0.9998	0.1177	0.9488	0.9758	1	0.6291	0.9747	0.2589	1		0.7632	0.5487	0.9776	0.816	1.0138	1.0666	1.0833	1.05		43	25	67	50	58	62
	1524			laurate (12:0)	LC/MS neg	1645	C02679	HMDB0000638	3893					8.71697	1.96	21.07	5.87	0.55		0.8493	0.9084	0.9439	0.8674	0.6667	0.9998	0.8681	1	0.6513	0.9942	0.7703	0.9938	0.7496	1		1.768	2.2861	1.2499	3.3855	13.794	15.4116	4.4849	26.3382		100	100	100	100	100	100
	1526			5-dodecenoate (12:1n7)	LC/MS neg	33968		HMDB0000529	5312378					1.91201	1.43	2.6	1.3	0.71		0.7051	0.8894	0.8213	0.8616	0.5339	0.9998	0.8655	1	0.4675	0.9942	0.7468	0.9938	0.5895	1		0.9297	1.0869	0.7726	1.3179	1.3895	1.7776	1.5489	2.0064		86	100	67	88	92	92
	1529		Long Chain Saturated Fatty Acid	myristate (14:0)	LC/MS neg	1365	C06424	HMDB0000806	11005					1.16779	1.11	1.19	2.75	2.56		0.8211	0.9084	0.437	0.8374	0.8443	0.9998	0.9837	1	0.7583	0.9984	0.6355	0.9775	0.5349	1		1.49	0.8382	2.1418	0.8837	2.3464	1.74	0.9291	2.5509		100	100	100	100	100	100
	1531			pentadecanoate (15:0)	LC/MS neg	1361	C16537	HMDB0000826	13849					0.320084	0.37	0.27	0.77	1.03		0.0887	0.8076	0.3194	0.8125	0.8084	0.9998	0.2979	0.9708	0.1529	0.9942	0.5366	0.9498	0.4295	1		2.8177	2.7731	2.8623	1.8967	1.8229	0.9019	1.0203	0.7835		86	75	100	88	100	100
	1532			palmitate (16:0)	LC/MS neg	1336	C00249	HMDB0000220	985					0.702788	1.02	0.6	1.75	2.99		0.3949	0.8361	0.0266	0.5251	0.5577	0.9998	0.8523	1	0.2989	0.9942	0.1555	0.9157	0.0709	1		1.4599	0.731	2.1889	0.739	1.7469	1.026	0.747	1.305		100	100	100	100	100	100
	1534			margarate (17:0)	LC/MS neg	1121		HMDB0002259	10465					0.304585	0.42	0.26	1.54	2.52		0.1265	0.8076	0.0707	0.6622	0.8054	0.9998	0.3633	0.9721	0.1934	0.9942	0.1916	0.9315	0.1831	1		3.25	1.8469	4.6531	1.3137	2.9263	0.9899	0.7804	1.1994		100	100	100	100	100	100
	1536			stearate (18:0)	LC/MS neg	1358	C01530	HMDB0000827	5281					0.743816	1.62	0.51	1.17	3.72		0.4581	0.8452	0.0493	0.5908	0.458	0.9998	0.9998	1	0.284	0.9942	0.2855	0.9315	0.0848	1		1.8678	0.792	2.9436	1.0362	2.2209	1.3893	1.2804	1.4981		100	100	100	100	100	100
	1538			nonadecanoate (19:0)	LC/MS neg	1356	C16535	HMDB0000772	12591					0.349516	1.22	0.24	1.59	8.04		0.2338	0.8076	0.0287	0.5251	0.4778	0.9998	0.7303	1	0.1715	0.9942	0.1937	0.9315	0.0637	1		3.1598	0.6989	5.6206	0.7765	3.4877	1.1044	0.854	1.3548		100	100	100	100	100	100
	1539			arachidate (20:0)	LC/MS neg	1118	C06425	HMDB0002212	10467					0.820204	1.49	0.74	3.93	7.97		0.5637	0.8754	0.0248	0.525	0.6766	0.9998	0.9112	1	0.4704	0.9942	0.1165	0.8928	0.0835	1		2.554	0.5692	4.5388	0.7098	3.939	2.0948	0.8504	3.3392		100	100	100	100	100	100
	1548		Long Chain Monounsaturated Fatty Acid	myristoleate (14:1n5)	LC/MS neg	32418	C08322	HMDB0002000	5281119					2.38732	1.94	2.94	1.24	0.82		0.4297	0.8361	0.7628	0.855	0.8352	0.9998	0.6862	1	0.4673	0.9942	0.6807	0.9808	0.9523	1		0.9008	0.992	0.8096	1.4579	1.5934	2.1505	1.9238	2.3771		100	100	100	100	92	92
	1551			palmitoleate (16:1n7)	LC/MS neg	33447	C08362	HMDB0003229	445638					5.24054	1.7	7.96	6.1	1.3		0.0834	0.8076	0.2121	0.7692	0.8891	0.9998	0.2585	0.9708	0.1666	0.9942	0.2609	0.9315	0.4719	1		0.6448	0.5603	0.7293	0.7562	3.2677	3.3791	0.9521	5.806		100	100	100	100	100	100
	1553			10-heptadecenoate (17:1n7)	LC/MS neg	33971		HMDB0060038	5312435					1.64876	1.47	1.73	2.69	2.29		0.4208	0.8361	0.0598	0.6338	0.5122	0.9998	0.319	0.9708	0.9109	1	0.2894	0.9315	0.1056	1		0.9045	0.5494	1.2596	0.6794	1.7165	1.4913	0.8094	2.1733		100	100	100	100	100	100
	1555			oleate/vaccenate (18:1)	LC/MS neg	52285	C01712 C08367 C00712 C21944	HMDB0000207 HMDB0000573 HMDB0003231 HMDB0240219	637517;445639;5281127;5282761					1.98882	3.37	1.59	1.62	3.43		0.0704	0.8076	0.0761	0.6635	0.3621	0.9998	0.0656	0.9488	0.4766	0.9942	0.4497	0.9315	0.0902	1		0.7874	0.3556	1.2192	0.7765	1.5769	1.566	1.1974	1.9347		100	100	100	100	100	100
	1562			10-nonadecenoate (19:1n9)	LC/MS neg	33972		HMDB0013622	5312513					1.50556	2.62	1.27	2.24	4.65		0.0879	0.8076	0.0212	0.525	0.3246	0.9998	0.0693	0.9488	0.5674	0.9942	0.2315	0.9315	0.0372	1		0.8727	0.3092	1.4363	0.56	1.6267	1.3139	0.8108	1.817		86	75	100	88	100	100
	1565			eicosenoate (20:1)	LC/MS neg	33587	C16526	HMDB0002231 HMDB0062436	5282769;5282768;94159					1.64781	1.8	1.62	4.54	5.05		0.5854	0.8754	0.0284	0.5251	0.6402	0.9998	0.4879	0.9912	0.954	1	0.1376	0.9157	0.085	1		1.4935	0.4935	2.4934	0.6914	3.2631	2.461	0.8892	4.0327		100	100	100	100	100	100
	1569			erucate (22:1n9)	LC/MS neg	1552	C08316	HMDB0002068	8216;5281116					1.01356	3.74	0.68	1.47	8.12		0.9406	0.9162	0.0398	0.5456	0.4093	0.9998	0.5349	0.9954	0.5816	0.9942	0.2776	0.9315	0.0673	1		2.4042	0.5273	4.281	1.2495	3.5914	2.4368	1.9718	2.9018		100	100	100	100	100	100
	1572		Long Chain Polyunsaturated Fatty Acid (n3 and n6)	tetradecadienoate (14:2)*	LC/MS neg	62850		HMDB0000560	5312409					4.54342	6.6	2.84	0.52	1.21		0.0095	0.7598	0.6998	0.8476	0.4282	0.9998	0.02	0.7331	0.1397	0.9942	0.3442	0.9315	0.7926	1		0.2775	0.2517	0.3033	0.9566	0.5817	1.2608	1.6615	0.8602		29	0	67	38	67	69
	1573			hexadecatrienoate (16:3n3)	LC/MS neg	57651			91820460					0.976989	0.69	12.11	0.45	0.03		0.0705	0.8076	0.1573	0.7336	0.5162	0.9998	0.3942	0.9802	0.0761	0.9942	0.5168	0.9456	0.1907	1		2.8725	5.6021	0.1429	4.7422	0.9367	2.8064	3.8823	1.7305		43	75	0	88	75	100
	1574			heptadecatrienoate (17:3)*	LC/MS neg	62383	C16344		16061034					2.59891	2.81	2.3	0.59	0.72		0.1579	0.8076	0.583	0.8374	0.9406	0.9998	0.3484	0.9708	0.2731	0.9942	0.7003	0.9935	0.6911	1		0.4388	0.5096	0.3681	0.972	0.6072	1.1404	1.4344	0.8464		14	25	0	38	42	54
	1582			eicosapentaenoate (EPA; 20:5n3)	LC/MS neg	18467	C06428	HMDB0001999	446284					0.952792	2.01	0.75	1.93	5.2		0.5174	0.8612	0.3517	0.8125	0.3504	0.9998	0.2809	0.9708	0.8296	0.9984	0.9982	1	0.2393	1		2.4424	0.7884	4.0963	1.1871	3.5824	2.3271	1.5858	3.0685		100	100	100	100	92	92
	1584			docosapentaenoate (n3 DPA; 22:5n3)	LC/MS neg	32504	C16513	HMDB0001976 HMDB0006528	6441454					1.97013	0.58	3.15	6.42	1.18		0.6526	0.8826	0.2672	0.7845	0.9446	0.9998	0.7931	1	0.7047	0.9942	0.3385	0.9315	0.5022	1		2.0457	1.8738	2.2177	1.4798	4.5962	4.0303	1.0858	6.9747		71	50	100	75	92	92
	1585			docosahexaenoate (DHA; 22:6n3)	LC/MS neg	44675	C06429	HMDB0002183	445580					1.7452	1.03	1.93	7.14	3.81		0.552	0.8742	0.3048	0.8055	0.6845	0.9998	0.4928	0.9912	0.8894	0.9991	0.6084	0.9634	0.3623	1		3.9184	1.629	6.2078	1.6548	9.102	6.8384	1.6806	11.9962		100	100	100	100	100	100
	1588			hexadecadienoate (16:2n6)	LC/MS neg	57652		HMDB0000477	13932172					3.80153	3.15	4.9	0.92	0.59		0.0006	0.7598	0.6768	0.847	0.6753	0.9998	0.0189	0.7116	0.0037	0.9942	0.9987	1	0.5956	1		0.3406	0.4274	0.2539	0.8866	0.7488	1.2948	1.3459	1.2437		100	100	100	100	100	100
	1589			linoleate (18:2n6)	LC/MS neg	1105	C01595	HMDB0000673 HMDB0006270	5280450					3.32744	3.46	3.25	1.54	1.64		0.036	0.8076	0.3202	0.8125	0.3159	0.9998	0.0363	0.8938	0.3742	0.9942	0.9939	1	0.2082	1		0.4584	0.3471	0.5697	0.7735	1.2102	1.5253	1.1998	1.8507		100	100	100	100	100	100
	1591			linolenate [alpha or gamma; (18:3n3 or 6)]	LC/MS neg	34035	C06426 C06427	HMDB0001388 HMDB0003073	5280933;5280934					7.46172	6.25	10.89	0.61	0.35		0.0276	0.7678	0.7043	0.8476	0.6041	0.9998	0.0594	0.9488	0.1862	0.9942	0.47	0.9315	0.9288	1		1.0933	1.6164	0.5702	5.8614	3.3897	8.1579	10.1064	6.2093		100	100	100	100	100	100
	1592			dihomo-linoleate (20:2n6)	LC/MS neg	17805	C16525	HMDB0005060	6439848					0.990209	0.69	1.13	3.69	2.24		0.966	0.9214	0.0333	0.5362	0.8897	0.9998	0.9474	1	0.8948	0.9991	0.0959	0.8655	0.1356	1		1.2461	0.7682	1.724	0.6474	1.8326	1.2339	0.5265	1.9413		100	100	100	100	100	100
	1595			arachidonate (20:4n6)	LC/MS neg	1110	C00219	HMDB0001043	444899					1.34329	1.14	1.44	2.68	2.12		0.4183	0.8361	0.1492	0.7313	0.6838	0.9998	0.4046	0.9826	0.7656	0.9984	0.3867	0.9315	0.2372	1		1.804	1.1556	2.4525	1.236	2.9913	2.4233	1.3165	3.5301		100	100	100	100	100	100
	1597			adrenate (22:4n6)	LC/MS neg	32980	C16527	HMDB0002226	5497181;5282844					1.33433	1.22	1.39	2.29	2		0.9083	0.9084	0.264	0.7824	0.9154	0.9998	0.8791	1	0.9948	1	0.4085	0.9315	0.4326	1		0.7675	0.5114	1.0235	0.5674	1.2241	1.0241	0.6235	1.4248		43	25	67	38	67	62
	1598			docosapentaenoate (n6 DPA; 22:5n6)	LC/MS neg	37478	C16513	HMDB0001976	6441454					1.76813	0.7	2.52	5.07	1.41		0.6205	0.8754	0.6041	0.8374	0.8701	0.9998	0.8189	1	0.6314	0.9942	0.5819	0.9599	0.8204	1		0.8824	0.7316	1.0332	0.6227	1.8199	1.5602	0.5139	2.6066		43	25	67	50	58	62
	1599			docosadienoate (22:2n6)	LC/MS neg	32415	C16533	HMDB0061714	5282807					0.233794	1.71	0.13	1.14	14.59		0.1405	0.8076	0.018	0.525	0.1865	0.9998	0.9081	1	0.0485	0.9942	0.3253	0.9315	0.0212	1		5.8235	0.7473	10.8998	1.0113	6.1738	1.3615	1.2754	1.4477		100	100	100	88	100	92
	1645		Fatty Acid Hydroxyl Fatty Acid	PAHSA (16:0/OH-18:0)	LC/MS pos late	52622		HMDB0112106 HMDB0112113	72189985;86290202					1.08854	0.15	10.46	7.19	0.1		0.6184	0.8754	0.9179	0.8629	0.106	0.9998	0.4197	0.9834	0.125	0.9942	0.161	0.9157	0.3214	1		0.6065	1.1021	0.1108	0.6317	0.635	0.6602	0.1612	1.1593		29	50	0	38	50	54
	1646			LAHSA (18:2/OH-18:0)*	LC/MS pos late	57390								3.26055	0.47	24.93	6.88	0.13		0.2602	0.8076	0.8178	0.8616	0.1705	0.9998	0.8562	1	0.0761	0.9942	0.1959	0.9315	0.4559	1		1.7812	3.1557	0.4067	2.3153	5.2735	5.8077	1.4749	10.1404		100	100	100	100	100	100
	1647			OAHSA (18:1/OH-18:0)	LC/MS pos late	57389								1.16751	0.21	11.52	5.17	0.09		0.7971	0.9084	0.8433	0.8629	0.4523	0.9998	0.7311	1	0.463	0.9942	0.4437	0.9315	0.7219	1		3.7902	6.9369	0.6436	4.186	4.0293	4.4251	1.4352	7.415		86	75	100	88	83	85
	1648		Fatty Acid, Branched	isocaproate (i6:0)	LC/MS neg	22273		HMDB00689	12587					2.57227	3.15	1.96	0.58	0.94		0.6948	0.8894	0.6882	0.8476	0.9564	0.9998	0.8162	1	0.7444	0.9984	0.7789	0.9938	0.7715	1		1.1713	1.2072	1.1355	2.5058	1.6785	3.0129	3.8043	2.2214		100	100	100	88	83	77
	1650			5-methylhexanoate (i7:0)	LC/MS neg	62745		HMDB0031595	12344					1.83233	2.17	1.65	1.46	1.92		0.5171	0.8612	0.6986	0.8476	0.6902	0.9998	0.4735	0.9912	0.854	0.9984	0.9926	1	0.6177	1		0.4467	0.3062	0.5872	0.4859	0.7794	0.8185	0.6655	0.9715		29	25	33	50	33	46
	1659			(12 or 13)-methylmyristate (a15:0 or i15:0)	LC/MS neg	38293		HMDB0061707	151014					0.662539	0.72	0.59	0.6	0.74		0.3905	0.8361	0.8248	0.8616	0.6735	0.9998	0.7594	1	0.3532	0.9942	0.8709	0.9938	0.6827	1		2.1724	2.5033	1.8414	2.1521	1.4596	1.4393	1.8008	1.0777		100	100	100	100	100	100
	1664			(14 or 15)-methylpalmitate (a17:0 or i17:0)	LC/MS neg	38768	C16995	HMDB0061859	8181;17903417					0.407366	0.51	0.3	0.56	0.97		0.2228	0.8076	0.4822	0.8374	0.6779	0.9998	0.5693	0.9954	0.2354	0.9942	0.8136	0.9938	0.4778	1		2.6065	2.6509	2.562	2.0042	1.664	1.0618	1.3575	0.766		100	100	100	100	100	100
	1670			(16 or 17)-methylstearate (a19:0 or i19:0)	LC/MS neg	38296		HMDB0037397	3083779					0.476431	1.74	0.28	1.08	6.57		0.5509	0.8742	0.0454	0.5692	0.4426	0.9998	0.9042	1	0.3239	0.9942	0.28	0.9315	0.0782	1		2.2975	0.6073	3.9878	0.8305	2.5616	1.0946	1.0537	1.1355		100	100	100	88	100	92
	1674			pristanate	LC/MS neg	38271		HMDB0000795	123929					0.657177	1.07	0.49	1.14	2.5		0.3911	0.8361	0.5221	0.8374	0.3985	0.9998	0.9925	1	0.2206	0.9942	0.8654	0.9938	0.3473	1		1.1592	0.6622	1.6562	0.6863	1.2347	0.7618	0.7105	0.8132		86	100	67	75	42	38
	1679		Fatty Acid, Dicarboxylate	dimethylmalonic acid	LC/MS polar	42978		HMDB0002001	11686					3.32399	4.49	1.19	0.14	0.54		0.0732	0.8076	0.0075	0.4823	0.233	0.9998	0.0455	0.9488	0.628	0.9942	0.0031	0.364	0.2636	1		1.0778	1.3956	0.7599	3.8277	0.8326	3.5826	6.2599	0.9054		100	100	100	100	100	100
	1681			glutarate (C5-DC)	LC/MS polar	396	C00489	HMDB0000661	743;4418048					1.88553	1.66	2.5	0.55	0.37		0.1827	0.8076	0.045	0.5692	0.5727	0.9998	0.5823	0.9954	0.1705	0.9942	0.2143	0.9315	0.0992	1		0.7976	1.166	0.4293	1.5507	0.7508	1.5039	1.9355	1.0723		100	100	100	100	100	100
	1684			3-methylglutarate/2-methylglutarate	LC/MS polar	54676		HMDB0000752 HMDB0000422	12046;12284					1.59635	0.83	2.7	2.27	0.7		0.9628	0.9214	0.62	0.8374	0.633	0.9998	0.7184	1	0.7529	0.9984	0.9881	1	0.5367	1		1.0093	1.1901	0.8285	1.0872	1.5333	1.6112	0.9843	2.2381		100	100	100	100	100	100
	1685			2-hydroxyglutarate	LC/MS pos early	52294	C02630	HMDB0059655	43					0.713551	1.02	0.5	0.69	1.41		0.9667	0.9214	0.3647	0.82	0.6112	0.9998	0.705	1	0.7331	0.9976	0.2577	0.9315	0.7953	1		1.4589	1.2111	1.7067	1.2233	1.2766	1.041	1.2355	0.8465		100	100	100	100	100	100
	1687			adipate (C6-DC)	LC/MS polar	21134	C06104	HMDB0000448	196					1.26432	0.97	1.59	1.5	0.91		0.8984	0.9084	0.8307	0.8616	0.6182	0.9998	0.7981	1	0.6482	0.9942	0.5656	0.9591	0.8555	1		0.9655	1.0097	0.9212	0.993	1.1931	1.2207	0.9764	1.465		100	100	100	100	100	100
	1688			3-carboxyadipate	LC/MS neg	54723			222467					1.4146	1.25	1.59	1.2	0.94		0.9653	0.9214	0.7044	0.8476	0.5431	0.9998	0.6535	1	0.6796	0.9942	0.4272	0.9315	0.8829	1		0.9976	1.0298	0.9654	1.1564	1.2524	1.4112	1.283	1.5393		100	100	100	100	100	100
	1689			2-hydroxyadipate	LC/MS polar	31934	C02360	HMDB0000321	193530					1.4127	1.82	1.14	0.94	1.51		0.5949	0.8754	0.8153	0.8616	0.2955	0.9998	0.2809	0.9708	0.6996	0.9942	0.5047	0.9438	0.4137	1		1.1529	0.9188	1.387	1.2969	1.4846	1.6287	1.6751	1.5823		86	75	100	88	83	85
	1690			3-hydroxyadipate	LC/MS polar	62069		HMDB0000345	151913					1.47431	1.61	1.34	0.83	1		0.1906	0.8076	0.7949	0.861	0.7949	0.9998	0.2789	0.9708	0.4334	0.9942	0.6747	0.9808	1	1		0.506	0.506	0.506	0.6598	0.5922	0.746	0.8136	0.6785		14	25	0	25	25	31
	1691			3-methyladipate	LC/MS polar	36749		HMDB0000555	12292					2.60743	6.47	0.94	0.34	2.32		0.3514	0.8101	0.5459	0.8374	0.3457	0.9998	0.203	0.9488	0.9933	1	0.778	0.9938	0.3272	1		0.8959	0.5405	1.2514	2.0193	1.2127	2.336	3.4981	1.174		57	50	67	63	83	85
	1693			maleate	LC/MS polar	20676	C01384	HMDB0000176	444266					1.40584	1.34	1.49	0.9	0.81		0.3577	0.8139	0.345	0.8125	0.9699	0.9998	0.5411	0.9954	0.483	0.9942	0.4607	0.9315	0.529	1		0.9824	1.0847	0.8801	1.268	1.0955	1.3811	1.4512	1.3109		100	100	100	100	100	100
	1695			pimelate (C7-DC)	LC/MS polar	15704	C02656	HMDB0000857	385					1.31463	1.21	1.47	0.77	0.63		0.7113	0.8894	0.5679	0.8374	0.4254	0.9998	0.7657	1	0.3967	0.9942	0.8518	0.9938	0.3859	1		1.0603	1.2971	0.8235	1.4357	1.0184	1.3939	1.5744	1.2134		100	100	100	88	100	92
	1696			heptenedioate (C7:1-DC)*	LC/MS polar	61866								0.880124	0.69	1.07	1.52	0.98		0.3357	0.8101	0.3324	0.8125	0.3683	0.9998	0.206	0.9488	0.9618	1	0.1391	0.9157	0.9631	1		0.971	0.9792	0.9627	0.8285	0.997	0.8546	0.6779	1.0312		100	100	100	75	92	77
	1698			suberate (C8-DC)	LC/MS polar	15730	C08278	HMDB0000893	10457					1.07757	0.98	1.27	0.67	0.52		0.9819	0.9214	0.1616	0.7336	0.6117	0.9998	0.7383	1	0.6986	0.9942	0.4537	0.9315	0.2247	1		1.2685	1.6742	0.8629	1.6556	0.9798	1.3669	1.6371	1.0968		100	100	100	100	100	100
	1701			azelate (C9-DC)	LC/MS polar	18362	C08261	HMDB0000784	2266					0.875192	0.72	1.42	0.56	0.28		0.6879	0.8894	0.1193	0.6985	0.5254	0.9998	0.871	1	0.4517	0.9942	0.4321	0.9315	0.1636	1		2.5375	3.9621	1.1128	3.4091	1.3492	2.2208	2.8561	1.5855		100	100	100	100	100	100
	1703			sebacate (C10-DC)	LC/MS neg	32398	C08277	HMDB0000792	5192					0.96803	0.83	1.24	0.73	0.49		0.9531	0.9205	0.2397	0.7692	0.8276	0.9998	0.9129	1	0.8402	0.9984	0.4306	0.9315	0.3723	1		1.5452	2.0746	1.0157	1.9026	1.1384	1.4958	1.7305	1.2611		100	100	100	100	100	100
	1704			decadienedioic acid (C10:2-DC)**	LC/MS neg	63685			17789717					0.672964	0.47	1.08	1.17	0.5		0.172	0.8076	0.3393	0.8125	0.1846	0.9998	0.0708	0.9488	0.9753	1	0.7495	0.9938	0.1508	1		0.9846	1.3088	0.6603	0.9601	0.6871	0.6626	0.6113	0.7139		86	100	67	75	75	69
	1705			undecanedioate (C11-DC)	LC/MS neg	42395		HMDB0000888	15816					0.85917	0.73	1.18	0.65	0.4		0.8544	0.9084	0.0338	0.5362	0.472	0.9998	0.7104	1	0.5106	0.9942	0.2181	0.9315	0.0694	1		1.4237	2.0323	0.815	1.7593	0.8875	1.2232	1.4864	0.96		100	100	100	100	100	100
	1707			tridecanedioate (C13-DC)	LC/MS neg	43027		HMDB0002327	10458					0.865386	0.79	0.94	1.29	1.08		0.3316	0.8101	0.5642	0.8374	0.7179	0.9998	0.3608	0.9721	0.6505	0.9942	0.4505	0.9315	0.8899	1		1.1247	1.0833	1.166	0.9669	1.1311	0.9733	0.8505	1.0961		100	100	100	100	100	100
	1708			dodecanedioate (C12-DC)	LC/MS neg	32388	C02678	HMDB0000623	12736					0.650769	0.68	0.59	0.48	0.55		0.4976	0.8549	0.1982	0.7637	0.8125	0.9998	0.7597	1	0.5052	0.9942	0.2186	0.9315	0.4936	1		2.2561	2.9045	1.6076	2.4459	1.2784	1.4682	1.9872	0.9491		100	100	100	100	100	100
	1709			3-hydroxydodecanedioate*	LC/MS neg	62915		HMDB0000413	16663321					1.51088	0.58	3.11	3.11	0.58		0.7764	0.9043	0.7764	0.8572	0.1302	0.9998	0.3827	0.9767	0.1886	0.9942	0.1472	0.9157	0.4181	1		0.4962	0.6275	0.365	0.4962	0.7497	0.7497	0.365	1.1343		43	50	33	25	42	31
	1710			dodecenedioate (C12:1-DC)*	LC/MS neg	61864		HMDB0000933	5283028					0.611155	0.39	1.63	0.9	0.22		0.5971	0.8754	0.1866	0.7612	0.1305	0.9998	0.162	0.9488	0.4532	0.9942	0.8647	0.9938	0.0767	1		1.3895	2.286	0.4931	1.5899	0.6488	0.8492	0.8939	0.8045		100	100	100	75	83	69
	1713			tetradecanedioate (C14-DC)	LC/MS neg	35669		HMDB0000872	13185					0.515852	1.14	0.31	0.86	3.1		0.1089	0.8076	0.225	0.7692	0.0596	0.9998	0.8238	1	0.0153	0.9942	0.5448	0.953	0.0527	1		1.7253	0.8409	2.6098	0.8994	1.7159	0.89	0.9579	0.822		100	100	100	100	83	85
	1715			branched chain 14:0 dicarboxylic acid**	LC/MS neg	63191								2.30059	2.22	2.36	1.59	1.5		0.3463	0.8101	0.6146	0.8374	0.6788	0.9998	0.3529	0.9708	0.6946	0.9942	0.9418	0.9978	0.5601	1		0.8267	0.6621	0.9912	1.0657	1.6629	1.9019	1.4693	2.3345		100	100	100	100	92	92
	1717			hexadecanedioate (C16-DC)	LC/MS neg	35678	C19615	HMDB0000672	10459					0.840418	1.66	0.56	0.99	2.93		0.7846	0.9061	0.1334	0.7149	0.0864	0.9998	0.1673	0.9488	0.2755	0.9942	0.8447	0.9938	0.0456	1		1.4538	0.7398	2.1678	0.9835	1.6922	1.2218	1.2272	1.2165		100	100	100	100	100	100
	1720			octadecanedioate (C18-DC)	LC/MS neg	36754		HMDB0000782	70095					1.51698	2.44	0.88	0.52	1.44		0.7086	0.8894	0.7599	0.855	0.1034	0.9998	0.1669	0.9488	0.341	0.9942	0.1189	0.8928	0.381	1		0.8923	0.7302	1.0543	1.2558	0.99	1.3536	1.7814	0.9258		100	100	100	100	92	92
	1721			octadecenedioate (C18:1-DC)	LC/MS neg	61861			9543674					2.29593	1.9	2.86	1.07	0.71		0.0384	0.8076	0.8276	0.8616	0.9005	0.9998	0.1627	0.9488	0.1015	0.9942	0.7817	0.9938	0.9529	1		0.7049	0.8248	0.5849	1.1945	1.1288	1.6184	1.5642	1.6727		86	75	100	88	100	100
	1722			octadecadienedioate (C18:2-DC)*	LC/MS neg	61860								1.55289	1.57	1.53	0.72	0.74		0.1041	0.8076	0.1974	0.7637	0.7466	0.9998	0.1776	0.9488	0.3246	0.9942	0.1948	0.9315	0.5272	1		0.5039	0.5805	0.4274	0.7458	0.5406	0.7825	0.9112	0.6539		14	25	0	50	33	54
	1729			3-carboxy-4-methyl-5-pentyl-2-furanpropionate (3-CMPFP)**	LC/MS neg	61871		HMDB0061643	194501					0.905681	1.14	0.74	0.91	1.41		0.4052	0.8361	0.5897	0.8374	0.8079	0.9998	0.4598	0.9912	0.6637	0.9942	0.5281	0.9484	0.8495	1		1.8448	1.5311	2.1586	1.6404	1.8752	1.6708	1.7497	1.5918		100	100	100	100	100	100
	1731			2-hydroxysebacate	LC/MS neg	63357		HMDB0000424	128458					0.661765	0.39	4.19	0.82	0.08		0.4069	0.8361	0.0005	0.4006	0.0016	0.9998	0.0594	0.9488	0.0037	0.9942	0.6816	0.9808	9.3137e-05	0.1261		1.6728	3.1082	0.2374	2.1636	0.6162	1.107	1.2189	0.9951		100	100	100	100	100	100
	1772		Fatty Acid, Amino	2-aminoheptanoate	LC/MS pos early	43761		HMDB0094649	227939					1.92114	1	2.84	2.84	1		0.4382	0.839	0.4382	0.8374	0.4382	0.9998	1	1	0.2635	0.9942	0.2168	0.9315	1	1		0.3741	0.3741	0.3741	0.3741	0.7187	0.7187	0.3741	1.0633		0	0	0	13	25	31
	1791		Fatty Acid Metabolism (also BCAA Metabolism)	butyrylglycine	LC/MS neg	31850		HMDB0000808	88412					1.03942	0.89	1.26	0.94	0.67		0.9852	0.9214	0.3884	0.8303	0.8304	0.9998	0.893	1	0.8653	0.9984	0.596	0.9613	0.4924	1		0.8524	1.0226	0.6821	0.9674	0.7711	0.886	0.9121	0.86		57	50	67	63	50	54
	1794			propionylglycine	LC/MS polar	31932		HMDB0000783	98681					0.623887	0.51	0.73	1.58	1.1		0.5463	0.8718	0.9373	0.8674	0.688	0.9998	0.8884	1	0.4657	0.9942	0.7936	0.9938	0.7598	1		1.3145	1.2523	1.3767	0.9442	1.1904	0.8201	0.6361	1.0041		57	50	67	63	67	69
	1796			methylmalonate (MMA)	LC/MS polar	1496	C02170	HMDB0000202	487					0.745755	0.32	2.02	2.06	0.33		0.4676	0.8485	0.7859	0.8604	0.2337	0.9998	0.1922	0.9488	0.7238	0.9976	0.4483	0.9315	0.3498	1		0.8952	1.3441	0.4462	0.8899	0.6729	0.6676	0.4358	0.8995		86	100	67	63	67	54
	1825		Fatty Acid Metabolism (Acyl Glycine)	valerylglycine	LC/MS neg	36768		HMDB0000927	4737557					1.13603	0.87	1.7	0.94	0.48		0.8561	0.9084	0.2185	0.7692	0.3195	0.9998	0.5703	0.9954	0.3902	0.9942	0.8402	0.9938	0.1613	1		1.088	1.4706	0.7054	1.3723	0.9517	1.236	1.274	1.198		100	100	100	100	92	92
	1845			N-palmitoylglycine	LC/MS neg	42092		HMDB0013034	151008					0.50321	0.37	0.65	1.63	0.93		0.1743	0.8076	0.5208	0.8374	0.6784	0.9998	0.5021	0.9912	0.1977	0.9942	0.8522	0.9938	0.5023	1		1.4644	1.5162	1.4126	1.0387	1.1626	0.7369	0.5611	0.9127		86	75	100	88	92	92
	1847			N-oleoylglycine	LC/MS neg	40467		HMDB0013631	6436908					1.00515	0.31	3.76	3.12	0.25		0.8569	0.9084	0.8904	0.8629	0.2343	0.9998	0.4799	0.9912	0.3163	0.9942	0.3886	0.9315	0.3943	1		0.5046	0.805	0.2042	0.5255	0.4863	0.5072	0.246	0.7685		14	25	0	38	25	38
	1849			N-linoleoylglycine	LC/MS neg	32462			6433346					0.975598	0.54	2.76	1.24	0.24		0.4564	0.8452	0.5128	0.8374	0.4063	0.9998	0.9516	1	0.256	0.9942	0.8839	0.9953	0.3472	1		0.6229	1.0018	0.244	0.7719	0.4587	0.6077	0.542	0.6734		14	25	0	38	42	54
	1854			3-hydroxymargaroylglycine	LC/MS neg	63670			10545348					0.601988	0.29	1.1	2.35	0.62		0.4535	0.8445	0.7603	0.855	0.8865	0.9998	0.5391	0.9954	0.6557	0.9942	0.7176	0.9938	0.9176	1		2.9773	3.6757	2.2789	2.3735	2.3961	1.7923	1.0713	2.5133		86	75	100	88	100	100
	1862		Fatty Acid Metabolism (Acyl Carnitine, Short Chain)	acetylcarnitine (C2)	LC/MS pos early	32198	C02571	HMDB0000201	7045767					3.18082	7.07	1.34	0.4	2.11		0.1858	0.8076	0.5748	0.8374	0.7635	0.9998	0.2629	0.9708	0.4441	0.9942	0.4876	0.9385	0.8674	1		0.7914	0.5088	1.074	2.0539	1.2548	2.5173	3.5991	1.4356		57	75	33	75	75	85
	1884		Fatty Acid Metabolism (Acyl Carnitine, Long Chain Saturated)	myristoylcarnitine (C14)	LC/MS pos late	33952		HMDB0005066	6426854					5.26764	5.06	5.4	1.77	1.66		0.0525	0.8076	0.7942	0.861	0.5727	0.9998	0.0852	0.9488	0.2848	0.9942	0.8049	0.9938	0.5999	1		0.2877	0.2166	0.3587	0.656	1.1471	1.5155	1.0954	1.9356		43	25	67	63	58	69
	1886			palmitoylcarnitine (C16)	LC/MS pos late	44681	C02990	HMDB0000222	461					2.87751	0.89	3.98	8.03	1.8		0.9988	0.9218	0.2532	0.7692	0.8402	0.9998	0.8906	1	0.8823	0.9991	0.2775	0.9315	0.5416	1		1.1087	0.7924	1.425	0.7496	3.5494	3.1903	0.7068	5.6738		100	100	100	88	83	77
	1887			margaroylcarnitine (C17)*	LC/MS pos late	57512		HMDB0006210	53477803					1.90161	0.55	2.6	9.02	1.92		0.8058	0.9084	0.1117	0.6985	0.5164	0.9998	0.539	0.9954	0.7669	0.9984	0.0759	0.8348	0.5257	1		0.7704	0.5279	1.0129	0.4102	1.8252	1.465	0.2925	2.6375		71	75	67	38	67	46
	1888			stearoylcarnitine (C18)	LC/MS pos late	34409		HMDB0000848	3006797					1.056	0.8	1.14	4.34	3.05		0.5086	0.8612	0.1054	0.6985	0.7717	0.9998	0.7968	1	0.4892	0.9942	0.2673	0.9315	0.2189	1		1.1874	0.5857	1.789	0.5275	1.9138	1.2539	0.4694	2.0385		71	50	100	63	75	69
	1889			arachidoylcarnitine (C20)*	LC/MS pos late	57513		HMDB0006460	53477833					0.832147	0.77	0.87	1.95	1.73		0.4602	0.8452	0.3666	0.82	0.836	0.9998	0.7123	1	0.491	0.9942	0.5692	0.9591	0.4789	1		1.6717	1.224	2.1195	1.0837	1.9791	1.3911	0.9435	1.8387		100	100	100	88	100	92
	1890			behenoylcarnitine (C22)*	LC/MS pos late	57514		HMDB0062468	71464577					1.03969	1.15	0.97	1.26	1.5		0.9732	0.9214	0.7445	0.8527	0.5051	0.9998	0.6622	1	0.609	0.9942	0.7806	0.9938	0.5282	1		1.0304	0.8238	1.237	0.8852	1.2166	1.0713	0.9466	1.1961		71	50	100	63	92	85
	1891			lignoceroylcarnitine (C24)*	LC/MS pos late	57515		HMDB0240665						0.862276	0.81	0.89	2.08	1.89		0.2963	0.8076	0.1229	0.6985	0.7127	0.9998	0.6347	1	0.3048	0.9942	0.3258	0.9315	0.2207	1		1.1327	0.7839	1.4816	0.7088	1.4006	0.9767	0.6338	1.3196		86	75	100	75	75	69
	1906		Fatty Acid Metabolism (Acyl Carnitine, Monounsaturated)	myristoleoylcarnitine (C14:1)*	LC/MS pos late	48182		HMDB0240588	129691961					2.38883	3.16	1.91	0.98	1.62		0.1947	0.8076	0.5566	0.8374	0.578	0.9998	0.2053	0.9488	0.5748	0.9942	0.9792	1	0.4681	1		0.5604	0.4277	0.6932	0.8893	1.0099	1.3387	1.3509	1.3266		57	25	100	50	75	69
	1907			palmitoleoylcarnitine (C16:1)*	LC/MS pos late	53223		HMDB0013207	71464547					2.39979	2.45	2.35	0.96	1		0.1139	0.8076	0.722	0.8517	0.722	0.9998	0.1812	0.9488	0.3537	0.9942	0.5664	0.9591	1	1		0.2909	0.2909	0.2909	0.5019	0.4871	0.6981	0.713	0.6833		0	0	0	25	33	46
	1908			oleoylcarnitine (C18:1)	LC/MS pos late	35160		HMDB0005065	6441392					8.43567	1.91	39.75	4.34	0.21		0.1795	0.8076	0.9191	0.8629	0.3078	0.9998	0.8129	1	0.0922	0.9942	0.4534	0.9315	0.4725	1		0.1609	0.2662	0.0555	0.3874	1.1308	1.3573	0.5085	2.2061		43	50	33	50	50	54
	1909			eicosenoylcarnitine (C20:1)*	LC/MS pos late	57519								1.41756	1.95	1.02	0.69	1.33		0.9892	0.9214	0.8515	0.8629	0.8357	0.9998	0.8939	1	0.872	0.9984	0.987	1	0.8018	1		1.264	1.0868	1.4412	1.6037	1.4521	1.7918	2.1206	1.4631		100	100	100	100	100	100
	1910			erucoylcarnitine (C22:1)*	LC/MS pos late	57525								1.66229	1.55	1.71	2.59	2.35		0.4301	0.8361	0.2751	0.7906	0.8396	0.9998	0.4954	0.9912	0.6658	0.9942	0.4657	0.9315	0.4079	1		0.6023	0.3594	0.8451	0.4584	1.145	1.0012	0.5574	1.4449		29	25	33	50	42	54
	1911			nervonoylcarnitine (C24:1)*	LC/MS pos late	57531		HMDB0006509						1.06539	0.9	1.18	1.94	1.48		0.7791	0.9061	0.4246	0.8374	0.8146	0.9998	0.9747	1	0.7077	0.9942	0.6448	0.9784	0.5105	1		0.8534	0.6891	1.0177	0.6536	1.1089	0.9092	0.6182	1.2001		43	25	67	38	50	46
	1913		Fatty Acid Metabolism (Acyl Carnitine, Polyunsaturated)	linoleoylcarnitine (C18:2)*	LC/MS pos late	46223		HMDB0006469	6450015					7.68122	3.67	11.58	3.25	1.03		0.0949	0.8076	0.7473	0.8527	0.7836	0.9998	0.3192	0.9708	0.1537	0.9942	0.6301	0.9747	0.9757	1		0.3322	0.3274	0.3371	0.7643	2.1197	2.5517	1.2012	3.9023		29	25	33	50	50	62
	1914			linolenoylcarnitine (C18:3)*	LC/MS pos late	57511								0.63066	0.65	0.61	0.95	1.02		0.2866	0.8076	0.8722	0.8629	0.5818	0.9998	0.7153	1	0.2426	0.9942	0.7513	0.9938	0.6506	1		1.6034	1.5886	1.6182	1.3125	1.3021	1.0112	1.0364	0.9861		86	75	100	88	92	92
	1924			docosahexaenoylcarnitine (C22:6)*	LC/MS pos late	57523								5.31501	6.51	2.88	0.22	0.49		0.0585	0.8076	0.0716	0.6622	0.5069	0.9998	0.0804	0.9488	0.3367	0.9942	0.051	0.7431	0.4379	1		0.4403	0.5916	0.2889	2.2206	0.5599	2.3402	3.8496	0.8309		57	75	33	88	58	77
	1950		Fatty Acid Metabolism (Acyl Carnitine, Hydroxy)	3-hydroxypalmitoylcarnitine	LC/MS pos late	61839		HMDB0013336	126456228					3.8482	3.39	4.01	3.47	2.93		0.185	0.8076	0.2983	0.8055	0.6993	0.9998	0.2394	0.9708	0.4802	0.9942	0.589	0.9599	0.3641	1		0.3801	0.1932	0.5669	0.4236	1.4191	1.4627	0.6541	2.2713		43	25	67	50	58	62
	1951			3-hydroxyoleoylcarnitine	LC/MS pos late	61840			129637446					3.93236	1	6.86	6.86	1		0.3852	0.8361	0.3852	0.8298	0.3852	0.9998	1	1	0.2115	0.9942	0.1681	0.9157	1	1		0.4731	0.4731	0.4731	0.4731	1.8604	1.8604	0.4731	3.2477		0	0	0	0	42	38
	1953		Carnitine Metabolism	deoxycarnitine	LC/MS pos early	36747	C01181	HMDB0001161	22620					0.308518	1.04	0.14	0.55	4.24		0.0744	0.8076	0.7457	0.8527	0.0979	0.9998	0.9188	1	0.0167	0.9942	0.2652	0.9315	0.2027	1		3.076	1.1747	4.9774	1.1987	2.8263	0.949	1.2227	0.6752		100	100	100	100	100	100
	1954			carnitine	LC/MS pos early	15500	C00487 C00308	HMDB0000062	288					0.648089	0.62	0.68	1.02	0.93		0.2741	0.8076	0.7473	0.8527	0.9739	0.9998	0.4609	0.9912	0.408	0.9942	0.8147	0.9938	0.8213	1		1.4785	1.5309	1.4261	1.24	1.1967	0.9582	0.9492	0.9673		100	100	100	100	100	100
	1960		Ketone Bodies	3-hydroxybutyrate (BHBA)	LC/MS polar	542	C03197 C01089	HMDB0000011 HMDB0000357 HMDB0000442	441;94318;92135					0.980972	0.75	1.13	2.29	1.52		0.8696	0.9084	0.3014	0.8055	0.975	0.9998	0.9273	1	0.8867	0.9991	0.4145	0.9315	0.4941	1		1.4295	1.1328	1.7262	0.9931	1.8387	1.4023	0.8534	1.9512		71	50	100	75	92	92
	1965		Fatty Acid Metabolism (Acyl Choline)	palmitoylcholine	LC/MS pos late	52944		HMDB0240592	151731					0.551384	0.51	0.67	0.4	0.31		0.0891	0.8076	0.1535	0.7336	0.7667	0.9998	0.166	0.9488	0.2879	0.9942	0.3476	0.9315	0.2689	1		1.8245	2.7917	0.8573	2.1137	0.7168	1.006	1.4357	0.5763		100	100	100	75	67	54
	1981		Fatty Acid, Monohydroxy	2-hydroxyheptanoate*	LC/MS polar	61827			2750949					0.479694	0.85	0.34	1.07	2.66		0.188	0.8076	0.2209	0.7692	0.2286	0.9998	0.9335	1	0.0736	0.9942	0.986	1	0.1276	1		1.7261	0.9425	2.5097	0.8711	1.683	0.828	0.7997	0.8563		71	50	100	63	75	69
	1984			2-hydroxydecanoate	LC/MS neg	42489		HMDB0094656	21488					0.832668	0.52	2.91	0.83	0.15		0.6111	0.8754	0.0082	0.4823	0.0125	0.9998	0.1346	0.9488	0.0274	0.9942	0.8723	0.9942	0.0019	0.7221		1.2771	2.223	0.3312	1.6935	0.647	1.0634	1.164	0.9628		86	100	67	100	92	100
	1988			2-hydroxylaurate	LC/MS neg	52916			97783					1.30721	0.7	2.31	2.02	0.61		0.9571	0.9211	0.9772	0.8763	0.2237	0.9998	0.3777	0.9767	0.3905	0.9942	0.3322	0.9315	0.4222	1		1.1253	1.3998	0.8508	1.1866	1.4097	1.471	0.9733	1.9687		100	100	100	100	100	100
	1989			2-hydroxymyristate	LC/MS neg	32413	C13790	HMDB0002261	1563					0.29957	0.22	0.44	1.13	0.57		0.1344	0.8076	0.5621	0.8374	0.5362	0.9998	0.1485	0.9488	0.501	0.9942	0.9746	1	0.4474	1		1.8373	2.3412	1.3334	1.4284	0.9593	0.5504	0.5156	0.5852		86	100	67	88	67	69
	1990			2-hydroxypalmitate	LC/MS neg	35675		HMDB0031057	12575964;92836;11065598					0.369224	0.39	0.36	1.79	1.95		0.1037	0.8076	0.063	0.6384	0.7662	0.9998	0.3426	0.9708	0.1588	0.9942	0.1893	0.9315	0.1627	1		1.7702	1.1994	2.341	0.834	1.5898	0.6536	0.4685	0.8386		100	100	100	100	100	100
	1993			2-hydroxystearate	LC/MS neg	17945	C03045 C03042	HMDB0062549	69417;439885;439887					0.484884	0.39	0.57	1.58	1.09		0.0402	0.8076	0.1241	0.6985	0.7689	0.9998	0.1011	0.9488	0.1777	0.9942	0.1398	0.9157	0.412	1		1.7134	1.6404	1.7865	1.1424	1.4018	0.8308	0.6445	1.0171		86	75	100	63	100	85
	1995			2-hydroxyarachidate*	LC/MS neg	61700			5225199					0.380303	0.74	0.3	1.93	4.7		0.1961	0.8076	0.0193	0.525	0.7476	0.9998	0.4927	0.9912	0.2394	0.9942	0.0845	0.8515	0.0808	1		2.4704	0.8664	4.0745	0.7542	2.6557	0.9395	0.6421	1.2369		100	100	100	100	100	100
	1996			2-hydroxybehenate	LC/MS neg	57663		HMDB0061660	193484					0.453991	1.3	0.28	1	4.73		0.2117	0.8076	0.0221	0.525	0.6481	0.9998	0.5736	0.9954	0.2163	0.9942	0.1136	0.8907	0.0744	1		2.7375	0.9559	4.519	1.0982	2.8821	1.2428	1.2405	1.2452		100	100	100	100	100	100
	1997			2-hydroxylignocerate*	LC/MS polar	61699	C17873	HMDB0039540	102430					0.892688	1.92	0.46	0.56	2.35		0.3877	0.8361	0.2254	0.7692	0.5524	0.9998	0.8494	1	0.292	0.9942	0.6042	0.9613	0.252	1		2.7667	1.6541	3.8794	2.4126	2.824	2.4698	3.1711	1.7686		86	75	100	75	100	92
	1998			2-hydroxynervonate*	LC/MS neg	61698			5312783					0.493845	1.53	0.27	0.8	4.57		0.1572	0.8076	0.0295	0.5253	0.5088	0.9998	0.5862	0.9971	0.135	0.9942	0.1849	0.9315	0.0689	1		2.5994	0.9336	4.2652	1.1799	2.7032	1.2837	1.4262	1.1412		100	100	100	100	100	100
	2000			3-hydroxyvalerate	LC/MS polar	57548		HMDB00531	107802					1.27739	0.98	1.7	1.22	0.71		0.6179	0.8754	0.9573	0.8686	0.5529	0.9998	0.9474	1	0.4284	0.9942	0.6614	0.9808	0.6799	1		0.6691	0.7848	0.5535	0.7779	0.7459	0.8547	0.771	0.9384		57	50	67	50	50	46
	2003			3-hydroxysuberate	LC/MS neg	31936		HMDB0000325	22328017					1.19652	0.64	2.8	1.53	0.35		0.2523	0.8076	0.3608	0.8187	0.0941	0.9998	0.6895	1	0.046	0.9942	0.5073	0.9438	0.1027	1		1.0686	1.5852	0.5521	1.299	1.0483	1.2786	1.0127	1.5446		86	75	100	88	100	100
	2004			3-hydroxydecanoate	LC/MS neg	22053		HMDB0002203	26612					1.26389	1.18	1.33	1.5	1.34		0.5635	0.8754	0.469	0.8374	0.9472	0.9998	0.7242	1	0.6385	0.9942	0.5223	0.9484	0.6736	1		0.792	0.6775	0.9065	0.7389	1.0541	1.001	0.8004	1.2017		43	50	33	50	58	62
	2005			3-hydroxytridecanoate	LC/MS neg	63858		HMDB0061655	5312749					0.288607	0.13	1	1.82	0.23		0.3429	0.8101	0.9796	0.8763	0.4808	0.9998	0.26	0.9708	0.8546	0.9984	0.5814	0.9599	0.6406	1		4.6818	7.6156	1.7481	4.287	1.7461	1.3512	0.9585	1.744		100	100	100	75	83	69
	2006			3-hydroxysebacate	LC/MS polar	31943		HMDB0000350	3017884					0.961376	0.39	2.46	2.44	0.38		0.8097	0.9084	0.854	0.8629	0.0824	0.9998	0.1687	0.9488	0.2583	0.9942	0.1967	0.9315	0.2127	1		0.8777	1.2689	0.4864	0.8795	0.842	0.8438	0.4901	1.1976		71	75	67	63	83	77
	2007			3-hydroxylaurate	LC/MS neg	32457		HMDB0000387	94216					2.1651	0.47	5.2	6.14	0.56		0.9791	0.9214	0.7019	0.8476	0.1508	0.9998	0.3236	0.9708	0.2796	0.9942	0.1443	0.9157	0.4867	1		1.3295	1.7066	0.9524	1.2563	2.9517	2.8785	0.8059	4.951		100	100	100	100	100	100
	2008			3-hydroxymyristate	LC/MS neg	21158		HMDB0061656	16064					1.38933	0.37	3.43	4.61	0.5		0.9256	0.9087	0.6546	0.8441	0.4197	0.9998	0.5348	0.9954	0.6003	0.9942	0.3145	0.9315	0.8157	1		1.5514	2.0687	1.0341	1.4187	2.2881	2.1554	0.7686	3.5422		100	100	100	100	100	100
	2009			3-hydroxypalmitate	LC/MS neg	27503		HMDB0010734	15569776					2.37825	0.3	5.66	11.77	0.63		0.9564	0.9211	0.9458	0.8674	0.6138	0.9998	0.7564	1	0.6832	0.9942	0.7233	0.9938	0.7152	1		0.6197	0.7596	0.4797	0.4952	1.5983	1.4738	0.2308	2.7169		57	75	33	75	42	54
	2010			3-hydroxymargarate	LC/MS neg	63671			93220					0.511447	0.21	1.23	2.49	0.42		0.5345	0.8664	0.4615	0.8374	0.9413	0.9998	0.7054	1	0.6121	0.9942	0.5902	0.9599	0.605	1		3.3982	4.7867	2.0097	2.8906	2.2455	1.738	0.9946	2.4814		100	100	100	100	100	100
	2011			3-hydroxystearate	LC/MS neg	52938		HMDB10737	5282907					1.5551	19.91	0.57	0.53	18.56		0.877	0.9084	0.3134	0.8082	0.2486	0.9998	0.3657	0.9721	0.4594	0.9942	0.9009	0.9953	0.1736	1		2.9784	0.3045	5.6523	3.1829	4.4272	4.6317	6.0613	3.2022		57	50	67	50	75	69
	2017			5-hydroxyhexanoate	LC/MS neg	31938		HMDB0000525 HMDB0000409	170748					2.7191	2.56	2.91	0.91	0.8		0.316	0.8076	0.9956	0.8786	0.7037	0.9998	0.6622	1	0.3153	0.9942	0.7548	0.9938	0.8113	1		0.7839	0.8727	0.695	1.5552	1.3601	2.1315	2.2377	2.0252		100	100	100	88	92	85
	2023			8-hydroxyoctanoate	LC/MS neg	21239		HMDB0061914	69820					1.50048	1.22	1.8	1.37	0.93		0.1156	0.8076	0.648	0.8374	0.4293	0.9998	0.566	0.9954	0.0901	0.9942	0.3175	0.9315	0.8287	1		0.5197	0.5386	0.5008	0.5978	0.7017	0.7798	0.657	0.9025		29	25	33	38	50	54
	2027			10-hydroxystearate	LC/MS neg	47123	C03195	HMDB0037396	9561835					2.7258	2.32	3.24	1.12	0.8		0.0097	0.7598	0.608	0.8374	0.5944	0.9998	0.1199	0.9488	0.0221	0.9942	0.9872	1	0.5071	1		0.4741	0.5262	0.4219	0.8729	0.8934	1.2923	1.2196	1.3649		100	100	100	100	100	100
	2036			13-HODE + 9-HODE	LC/MS neg	37752	C14767 C14762	HMDB0004667 HMDB0004670	5312830;1424;5282947;5282944;5282945					6.28687	6.63	5.8	0.61	0.7		0.0648	0.8076	0.6691	0.8462	0.824	0.9998	0.1485	0.9488	0.2186	0.9942	0.6001	0.9613	0.8957	1		0.4469	0.5255	0.3683	2.0046	1.2519	2.8096	3.4837	2.1355		86	75	100	75	83	77
	2052		Fatty Acid, Dihydroxy	12,13-DiHOME	LC/MS neg	38395	C14829	HMDB0004705	10236635					2.16857	2.45	1.95	1.04	1.31		0.1233	0.8076	0.6836	0.8475	0.6973	0.9998	0.4101	0.9826	0.1598	0.9942	0.5213	0.9484	0.9905	1		0.6395	0.5531	0.7258	0.9549	1.0714	1.3868	1.3566	1.417		86	75	100	88	100	100
	2053			9,10-DiHOME	LC/MS neg	38399	C14828	HMDB0004704	9966640					2.43286	3.49	1.81	0.88	1.7		0.4057	0.8361	0.8201	0.8616	0.4619	0.9998	0.2855	0.9708	0.9427	1	0.4374	0.9315	0.7438	1		0.6457	0.4775	0.8138	1.0722	1.1443	1.5709	1.6669	1.4749		100	100	100	100	92	92
	2054			9,10-DiHOME sulfate	LC/MS neg	63605								0.642524	0.55	0.81	0.83	0.56		0.1073	0.8076	0.2189	0.7692	0.6685	0.9998	0.1604	0.9488	0.3685	0.9942	0.5049	0.9438	0.2911	1		1.6099	2.0592	1.1605	1.5958	1.0484	1.0344	1.1324	0.9364		100	100	100	100	83	85
	2055			2S,3R-dihydroxybutyrate	LC/MS polar	62950		HMDB0002453	10964471					1.30163	1.07	1.7	0.91	0.57		0.2411	0.8076	0.0951	0.6985	0.2926	0.9998	0.9305	1	0.1123	0.9942	0.5869	0.9599	0.0874	1		0.8242	1.0474	0.601	1.0856	0.8113	1.0728	1.1239	1.0216		86	100	67	100	83	92
	2056			2R,3R-dihydroxybutyrate	LC/MS polar	63109		HMDB0000498	13120901					0.813217	0.66	0.99	1.32	0.88		0.4207	0.8361	0.7993	0.861	0.4968	0.9998	0.3112	0.9708	0.925	1	0.7285	0.9938	0.5524	1		0.9594	1.019	0.8997	0.8464	0.8932	0.7802	0.6737	0.8867		100	100	100	100	100	100
	2058			2,4-dihydroxybutyrate	LC/MS polar	62951		HMDB0000360	192742					1.36743	0.91	2.42	1.17	0.44		0.283	0.8076	0.517	0.8374	0.3371	0.9998	0.9345	1	0.1453	0.9942	0.7948	0.9938	0.3088	1		1.0919	1.5183	0.6655	1.448	1.137	1.4931	1.3777	1.6086		57	75	33	88	75	92
	2059			3,4-dihydroxybutyrate	LC/MS polar	62952		HMDB0000337	150929					0.807554	0.5	1.29	1.69	0.65		0.3471	0.8101	0.7005	0.8476	0.2126	0.9998	0.1388	0.9488	0.8132	0.9984	0.1907	0.9315	0.5721	1		1.2762	1.5446	1.0078	1.1549	1.1519	1.0306	0.7653	1.296		100	100	100	100	100	100
	2181		Endocannabinoid	oleoyl ethanolamide	LC/MS pos late	38102		HMDB0002088	5283454					4.11899	0.93	8.58	6.61	0.72		0.2587	0.8076	0.5473	0.8374	0.304	0.9998	0.9412	1	0.1231	0.9942	0.194	0.9315	0.7797	1		0.8589	1.0013	0.7165	0.9655	3.4312	3.5378	0.9298	6.1459		86	75	100	88	100	100
	2184			palmitoyl ethanolamide	LC/MS pos late	38165	C16512	HMDB0002100	4671					1.10495	0.34	2.11	4.63	0.76		0.6243	0.8754	0.3457	0.8125	0.4037	0.9998	0.3648	0.9721	0.7972	0.9984	0.1585	0.9157	0.9432	1		2.1687	2.4691	1.8683	1.6601	2.9049	2.3963	0.8512	3.9415		100	100	100	100	100	100
	2185			stearoyl ethanolamide	LC/MS pos late	38625		HMDB0013078	27902					0.352014	0.08	1.89	3.96	0.17		0.3555	0.8131	0.7529	0.8528	0.1499	0.9998	0.1098	0.9488	0.688	0.9942	0.1578	0.9157	0.4591	1		3.7669	6.4158	1.118	3.4752	1.6177	1.326	0.5346	2.1175		100	100	100	100	100	100
	2189			arachidonoyl ethanolamide	LC/MS pos late	32463	C11695	HMDB0004080	5281969					1.88544	0.92	2.77	3.29	1.09		0.6279	0.8754	0.3701	0.8227	0.4878	0.9998	0.8839	1	0.393	0.9942	0.2054	0.9315	0.8944	1		0.6032	0.5768	0.6296	0.5537	1.1868	1.1373	0.5306	1.7441		43	25	67	13	42	23
	2194			N-oleoyltaurine	LC/MS neg	39732			6437033					0.701828	1	0.56	1.18	2.1		0.3102	0.8076	0.122	0.6985	0.3102	0.9998	1	1	0.1461	0.9942	0.6426	0.9784	0.1074	1		0.5963	0.3842	0.8083	0.3842	0.6305	0.4185	0.3842	0.4527		14	0	33	13	17	15
	2202			hexanoyltaurine	LC/MS neg	63224			2245940					0.228579	1	0.13	1	7.75		0.1123	0.8076	0.1123	0.6985	0.1123	0.9998	1	1	0.0262	0.9942	1	1	0.0483	1		0.3933	0.0899	0.6966	0.0899	0.3933	0.0899	0.0899	0.0899		29	25	33	13	8	0
	2204			linoleoyl ethanolamide	LC/MS neg	52608		HMDB0012252	5283446					9.87025	0.71	13.69	46.24	2.4		0.5654	0.8754	0.1245	0.6985	0.569	0.9998	0.9971	1	0.4069	0.9942	0.0939	0.8655	0.5178	1		2.353	1.3843	3.3217	1.1838	24.3939	23.2247	0.9833	45.466		86	75	100	88	100	100
	2205			linolenoyl ethanolamide	LC/MS pos late	62746		HMDB0013624	5283449					1.10313	0.21	6.89	5.16	0.16		0.8127	0.9084	0.9374	0.8674	0.3345	0.9998	0.6114	0.9981	0.381	0.9942	0.3976	0.9315	0.5685	1		0.9318	1.6134	0.2501	0.9735	0.9862	1.0279	0.3335	1.7223		43	25	67	25	50	38
	2207			arachidoyl ethanolamide (20:0)*	LC/MS pos late	57532			3787294					0.136508	0.09	0.93	0.69	0.06		0.2406	0.8076	0.2458	0.7692	0.3115	0.9998	0.1393	0.9488	0.9009	0.9991	0.8989	0.9953	0.1715	1		8.4625	15.9157	1.0094	8.6426	0.975	1.1552	1.3696	0.9407		71	75	67	75	75	77
	2208			behenoyl ethanolamide (22:0)*	LC/MS pos late	57534			3023585					0.22863	0.16	0.63	0.62	0.16		0.1588	0.8076	0.1562	0.7336	0.367	0.9998	0.1177	0.9488	0.6938	0.9942	0.657	0.9804	0.1438	1		4.3192	7.4245	1.2139	4.3203	0.9864	0.9875	1.2162	0.7589		100	100	100	88	83	77
	2211			lignoceroyl ethanolamide (24:0)*	LC/MS pos late	57535								0.157793	0.11	0.43	0.67	0.17		0.0097	0.7598	0.1188	0.6985	0.3587	0.9998	0.0169	0.7017	0.166	0.9942	0.5776	0.9599	0.1185	1		5.2499	8.9558	1.5441	4.9746	1.1038	0.8284	0.9934	0.6635		100	100	100	88	100	92
	2212			nervonoyl ethanolamide (24:1)*	LC/MS pos late	57536								1.14421	1.14	1.15	1.07	1.06		0.3749	0.8361	0.6717	0.8468	0.9394	0.9998	0.506	0.9912	0.551	0.9942	0.778	0.9938	0.7503	1		0.7628	0.7392	0.7864	0.7905	0.8452	0.8728	0.8417	0.904		14	0	33	25	33	38
	2218			N-oleoylserine	LC/MS neg	57664			44190514					1.09096	0.66	1.73	1.79	0.68		0.9799	0.9214	0.9156	0.8629	0.3017	0.9998	0.4636	0.9912	0.4588	0.9942	0.3562	0.9315	0.5502	1		0.5805	0.6903	0.4708	0.5723	0.6415	0.6333	0.4544	0.8122		29	25	33	13	33	23
	2219			N-stearoylserine*	LC/MS neg	61822								1.04288	0.88	1.13	2.34	1.82		0.9313	0.9105	0.1712	0.7407	0.8006	0.9998	0.8159	1	0.9034	0.9991	0.1908	0.9315	0.4653	1		0.3895	0.2762	0.5027	0.2597	0.536	0.4062	0.2432	0.5693		43	25	67	13	42	23
	2223		Inositol Metabolism	myo-inositol	LC/MS polar	1124	C00137	HMDB0000211	892					1.2133	0.68	1.93	2.09	0.74		0.8417	0.9084	0.8898	0.8629	0.4444	0.9998	0.6949	1	0.4822	0.9942	0.4654	0.9315	0.6877	1		1.1913	1.3693	1.0132	1.1519	1.4847	1.4454	0.9346	1.9563		100	100	100	100	100	100
	2254		Phospholipid Metabolism	choline	LC/MS pos early	15506	C00114	HMDB0000097	305					1.89948	2.94	1.34	0.86	1.88		0.4692	0.8485	0.699	0.8476	0.7723	0.9998	0.4869	0.9912	0.7487	0.9984	0.9369	0.9974	0.6675	1		1.2644	0.8767	1.6521	1.7292	1.937	2.4017	2.5817	2.2218		100	100	100	100	100	100
	2255			choline phosphate	LC/MS pos early	34396	C00588	HMDB0001565	1014					29.429	43.31	22.06	0.96	1.88		0.1544	0.8076	0.9486	0.8674	0.5933	0.9998	0.1801	0.9488	0.4987	0.9942	0.6283	0.9747	0.7642	1		1.0057	0.6975	1.3139	15.4516	15.1509	29.5967	30.2056	28.9878		100	100	100	100	92	92
	2258			glycerophosphorylcholine (GPC)	LC/MS pos early	15990	C00670	HMDB0000086	71920					6.92546	13.39	2.28	0.24	1.39		0.3975	0.8361	0.6375	0.8374	0.8597	0.9998	0.4814	0.9912	0.622	0.9942	0.811	0.9938	0.6802	1		1.0652	0.8909	1.2395	6.4088	2.0334	7.377	11.9267	2.8274		71	75	67	75	83	85
	2262			glycerophosphoethanolamine	LC/MS pos early	37455	C01233	HMDB0000114	123874					0.8498	1.44	0.5	0.57	1.67		0.5909	0.8754	0.9531	0.8677	0.5259	0.9998	0.9461	1	0.3959	0.9942	0.6405	0.9775	0.6583	1		1.6538	1.2383	2.0693	1.5121	1.5471	1.4054	1.7858	1.0249		100	100	100	100	100	100
	2263			glycerophosphoserine*	LC/MS pos early	57404			3081457					1.14441	2.21	0.75	0.9	2.66		0.9343	0.9114	0.6772	0.847	0.8345	0.9998	0.8413	1	0.9265	1	0.8662	0.9938	0.6909	1		1.2035	0.6574	1.7496	1.0542	1.5266	1.3773	1.4509	1.3037		86	100	67	75	67	62
	2264			glycerophosphoinositol*	LC/MS pos early	52307			167572					1.25764	1.29	1.23	1.21	1.27		0.8332	0.9084	0.9023	0.8629	0.7976	0.9998	0.9748	1	0.7338	0.9976	0.9138	0.9953	0.8094	1		1.1256	0.9927	1.2586	1.137	1.4042	1.4156	1.2813	1.5499		86	100	67	100	92	100
	2265			trimethylamine N-oxide	LC/MS pos early	40406	C01104	HMDB0000925	1145					1.00753	0.88	1.09	1.81	1.46		0.8669	0.9084	0.6458	0.8374	0.9498	0.9998	0.8742	1	0.9392	1	0.6726	0.9808	0.8002	1		1.3952	1.1346	1.6559	1.0676	1.7334	1.4057	1.0005	1.811		100	100	100	100	100	100
	2300		Phosphatidylcholine (PC)	1,2-dipalmitoyl-GPC (16:0/16:0)	LC/MS pos late	19130	D03585	HMDB0000564	452110					0.165142	2.02	0.1	1.32	27.38		0.4004	0.8361	0.0584	0.6338	0.0861	0.9998	0.5167	0.9944	0.0673	0.9942	0.8675	0.9938	0.0256	1		5.5189	0.389	10.6489	0.5868	5.8436	0.9114	0.7846	1.0383		71	50	100	63	75	69
	2301			1-palmitoyl-2-palmitoleoyl-GPC (16:0/16:1)*	LC/MS pos late	52470		HMDB0007969	6443788					17.2753	26.86	8.91	0.38	1.15		0.2561	0.8076	0.7902	0.861	0.989	0.9998	0.4356	0.9897	0.3979	0.9942	0.8209	0.9938	0.8724	1		0.1177	0.1097	0.1257	1.5281	0.6229	2.0333	2.9465	1.1202		57	50	67	38	50	38
	2344			1-stearoyl-2-oleoyl-GPC (18:0/18:1)	LC/MS pos late	52438		HMDB0008038	24778825					0.939895	2.76	0.64	1.41	6.07		0.9091	0.9084	0.2013	0.7662	0.0825	0.9998	0.195	0.9488	0.2238	0.9942	0.68	0.9808	0.0597	1		1.4225	0.4024	2.4425	0.7569	2.0025	1.337	1.1114	1.5625		57	25	100	50	75	69
	2381			1,2-dilinoleoyl-GPC (18:2/18:2)	LC/MS pos late	52603		HMDB0008138	5288075					1.2381	1.91	0.74	0.51	1.34		0.6968	0.8894	0.7785	0.8572	0.2263	0.9998	0.2721	0.9708	0.5388	0.9942	0.4432	0.9315	0.3404	1		0.9941	0.8506	1.1376	1.2379	0.9869	1.2308	1.6253	0.8363		57	25	100	63	83	85
	2432		Phosphatidylethanolamine (PE)	1-palmitoyl-2-linoleoyl-GPE (16:0/18:2)	LC/MS pos late	42449		HMDB0005322	9546747					0.209573	0.34	0.17	1.42	2.88		0.024	0.7678	0.0947	0.6985	0.1117	0.9998	0.5854	0.9971	0.0077	0.9942	0.941	0.9977	0.0428	1		2.34	1.2048	3.4752	0.8055	2.025	0.4904	0.4061	0.5747		71	50	100	63	50	46
	2622		Lysophospholipid	1-palmitoyl-GPC (16:0)	LC/MS pos late	33955	C04102	HMDB0010382	86554					0.790942	7.53	0.42	1.01	18.15		0.4317	0.8361	0.6046	0.8374	0.3106	0.9998	0.2209	0.9622	0.863	0.9984	0.6803	0.9808	0.3311	1		8.4541	0.883	16.0252	3.7676	11.3733	6.6867	6.6522	6.7213		100	100	100	100	100	100
	2623			2-palmitoyl-GPC (16:0)*	LC/MS neg	35253		HMDB0061702	15061532					1.4013	1	1.78	1.88	1.05		0.6361	0.8754	0.4991	0.8374	0.6361	0.9998	1	1	0.4921	0.9942	0.3566	0.9315	0.8957	1		0.7563	0.7362	0.7765	0.7362	1.08	1.0598	0.7362	1.3834		14	0	33	13	25	23
	2633			1-stearoyl-GPC (18:0)	LC/MS pos late	33961		HMDB0010384	497300					1.99199	3.1	1.8	3.27	5.64		0.23	0.8076	0.3946	0.8317	0.7008	0.9998	0.2766	0.9708	0.5411	0.9942	0.7009	0.9935	0.4323	1		1.9722	0.5944	3.35	1.2174	4.6834	3.9286	1.8405	6.0167		100	100	100	100	100	100
	2635			1-oleoyl-GPC (18:1)	LC/MS pos late	48258	C03916	HMDB0002815	16081932					4.30134	8.25	3.3	1.59	3.96		0.2462	0.8076	0.8973	0.8629	0.4725	0.9998	0.2013	0.9488	0.7375	0.9984	0.4934	0.9385	0.7056	1		1.1001	0.4435	1.7568	2.0516	3.7805	4.7319	3.6597	5.8042		57	50	67	75	67	77
	2636			2-oleoyl-GPC (18:1)*	LC/MS neg	48259		HMDB0061701	24779494					1.89015	1	2.7	2.97	1.1		0.7278	0.8894	0.5485	0.8374	0.7278	0.9998	1	1	0.6127	0.9942	0.4456	0.9315	0.8713	1		0.8084	0.7701	0.8467	0.7701	1.5663	1.528	0.7701	2.2859		14	0	33	13	17	15
	2638			1-linoleoyl-GPC (18:2)	LC/MS pos late	34419	C04100	HMDB0010386	11988421					10.0527	10.15	9.98	1.35	1.38		0.2829	0.8076	0.878	0.8629	0.7205	0.9998	0.3257	0.9708	0.5936	0.9942	0.8684	0.9938	0.745	1		0.4684	0.3941	0.5428	2.1971	2.98	4.7087	4.0001	5.4172		43	25	67	50	58	62
	2681			1-myristoyl-GPE (14:0)	LC/MS pos late	35627	C04438	HMDB0011500	86583448					0.603681	0.38	0.82	2.29	1.06		0.3254	0.8076	0.2311	0.7692	0.9965	0.9998	0.4975	0.9912	0.4684	0.9942	0.3308	0.9315	0.4384	1		1.4506	1.407	1.4942	0.9697	1.3567	0.8757	0.5324	1.2191		86	75	100	63	92	77
	2684			1-palmitoyl-GPE (16:0)	LC/MS pos late	35631		HMDB0011503	9547069					0.532521	0.62	0.5	2.15	2.69		0.4176	0.8361	0.2153	0.7692	0.5992	0.9998	0.8415	1	0.3334	0.9942	0.5506	0.954	0.2622	1		2.1171	1.1484	3.0857	0.9324	2.3121	1.1274	0.7164	1.5384		100	100	100	100	100	100
	2690			1-margaroyl-GPE (17:0)*	LC/MS neg	37419		HMDB0061691	52925149					0.4296	0.86	0.37	2.9	6.82		0.2234	0.8076	0.025	0.525	0.3136	0.9998	0.8784	1	0.1121	0.9942	0.2634	0.9315	0.04	1		2.973	0.76	5.186	0.7074	3.5428	1.2772	0.6548	1.8996		71	50	100	63	100	92
	2691			1-stearoyl-GPE (18:0)	LC/MS pos late	42398		HMDB0011130	9547068					1.01587	1.82	0.84	2.11	4.57		0.8551	0.9084	0.2829	0.7906	0.5496	0.9998	0.5915	0.9977	0.7604	0.9984	0.6914	0.9886	0.2894	1		2.2748	0.8164	3.7332	1.1517	3.4339	2.3109	1.4871	3.1347		71	75	67	88	92	100
	2692			2-stearoyl-GPE (18:0)*	LC/MS neg	41220		HMDB0011129	90658453;53480667					0.821706	1.31	0.73	3.11	5.55		0.8302	0.9084	0.1609	0.7336	0.5071	0.9998	0.7557	1	0.5227	0.9942	0.5312	0.9484	0.1905	1		2.0225	0.6174	3.4276	0.7128	2.9715	1.6619	0.8082	2.5155		43	25	67	38	58	54
	2693			1-oleoyl-GPE (18:1)	LC/MS pos late	35628		HMDB0011506	9547071					0.867362	0.88	0.86	1.37	1.39		0.9289	0.909	0.6254	0.8374	0.6223	0.9998	0.7809	1	0.6714	0.9942	0.9972	1	0.5336	1		1.2078	1.0092	1.4064	0.9469	1.3085	1.0476	0.8845	1.2106		86	75	100	88	92	92
	2695			1-linoleoyl-GPE (18:2)*	LC/MS pos late	36600		HMDB0011507	52925130					4.28581	3.89	4.58	1.57	1.33		0.4462	0.839	0.9414	0.8674	0.7363	0.9998	0.4513	0.9912	0.7535	0.9984	0.8312	0.9938	0.794	1		0.9314	0.7991	1.0637	1.9533	2.9699	3.9918	3.1075	4.8761		86	100	67	88	50	54
	2723			1-palmitoyl-GPS (16:0)*	LC/MS neg	46130			9547100					0.520654	1.55	0.47	6.81	22.24		0.6261	0.8754	0.0774	0.6635	0.3623	0.9998	0.7657	1	0.3113	0.9942	0.4539	0.9315	0.0912	1		2.7016	0.2325	5.1706	0.2963	3.8119	1.4066	0.36	2.4532		43	25	67	25	42	31
	2724			1-stearoyl-GPS (18:0)*	LC/MS neg	45966		HMDB0061698	74819135					0.456658	1.09	0.39	3.46	9.69		0.5426	0.8713	0.0501	0.5908	0.6072	0.9998	0.9473	1	0.4157	0.9942	0.2156	0.9315	0.112	1		4.6906	0.8772	8.5041	0.9187	5.9139	2.142	0.9603	3.3237		100	100	100	100	100	100
	2730			1-palmitoyl-GPG (16:0)*	LC/MS neg	45970		HMDB0240601	3300276					1.77045	7.02	1.04	1.07	7.22		0.2435	0.8076	0.0362	0.5433	0.054	0.9998	0.0381	0.92	0.5357	0.9942	0.8694	0.9938	0.0135	1		1.032	0.2511	1.8129	1.0064	1.8527	1.8271	1.7617	1.8925		86	75	100	88	100	100
	2733			1-stearoyl-GPG (18:0)	LC/MS neg	34437								0.981593	3.14	0.6	1.1	5.73		0.726	0.8894	0.2492	0.7692	0.3167	0.9998	0.3536	0.9708	0.6284	0.9942	0.8973	0.9953	0.1752	1		1.9395	0.5764	3.3026	1.1945	2.6488	1.9038	1.8127	1.995		71	75	67	75	92	92
	2735			1-oleoyl-GPG (18:1)*	LC/MS neg	45968		HMDB0240602						2.30811	5.26	1.47	0.99	3.54		0.2855	0.8076	0.4585	0.8374	0.3113	0.9998	0.1589	0.9488	0.966	1	0.8201	0.9938	0.2676	1		0.8945	0.3943	1.3946	1.2342	1.7249	2.0646	2.074	2.0551		43	25	67	50	75	77
	2736			2-oleoyl-GPG (18:1)*	LC/MS neg	46196								1.57595	1.75	1.44	1.04	1.26		0.2559	0.8076	0.8573	0.8629	0.5823	0.9998	0.2493	0.9708	0.659	0.9942	0.7634	0.9938	0.6423	1		0.4997	0.4415	0.558	0.6061	0.6811	0.7875	0.7707	0.8043		29	0	67	25	42	38
	2739			1-palmitoyl-GPI (16:0)	LC/MS neg	35305		HMDB0061695	71296207					1.38993	3.35	1.24	4.91	13.25		0.565	0.8754	0.2651	0.7836	0.4083	0.9998	0.3381	0.9708	0.8512	0.9984	0.8079	0.9938	0.2205	1		1.5603	0.219	2.9016	0.4763	3.2528	2.1687	0.7335	3.6039		71	75	67	88	75	85
	2743			1-stearoyl-GPI (18:0)	LC/MS neg	19324		HMDB0240261	71581135;42607495					0.712442	1.69	0.59	2.87	8.2		0.8781	0.9084	0.0573	0.6327	0.6114	0.9998	0.6494	1	0.795	0.9984	0.2338	0.9315	0.122	1		3.3016	0.7174	5.8858	0.9661	4.6878	2.3522	1.2147	3.4897		86	100	67	100	92	100
	2745			1-oleoyl-GPI (18:1)	LC/MS neg	36602		HMDB0061693	86289645					1.8363	1	2.28	4.26	1.87		0.7693	0.9017	0.1754	0.743	0.7693	0.9998	1	1	0.6694	0.9942	0.1842	0.9315	0.4865	1		0.416	0.2903	0.5417	0.2903	0.8896	0.7639	0.2903	1.2374		29	0	67	13	42	31
	2747			1-linoleoyl-GPI (18:2)*	LC/MS neg	36594		HMDB0240597	11124828					1.21309	1.3	1.16	1.32	1.48		0.7003	0.8894	0.4333	0.8374	0.6876	0.9998	0.5895	0.9977	0.9899	1	0.754	0.9938	0.4514	1		0.6082	0.4909	0.7256	0.5638	0.7822	0.7378	0.6368	0.8388		29	0	67	13	42	31
	2853		Lysoplasmalogen	1-palmityl-GPC (O-16:0)	LC/MS pos late	20458			3983					0.597915	1.74	0.37	1.09	5.06		0.8128	0.9084	0.2805	0.7906	0.2695	0.9998	0.5436	0.9954	0.3279	0.9942	0.983	1	0.1696	1		0.7675	0.2531	1.2819	0.3465	0.8799	0.4589	0.4398	0.4779		14	0	33	13	33	31
	2857			1-(1-enyl-palmitoyl)-GPE (P-16:0)*	LC/MS pos late	39270		HMDB0011152						0.258973	0.53	0.2	1.9	4.91		0.2713	0.8076	0.1121	0.6985	0.9705	0.9998	0.4599	0.9912	0.4036	0.9942	0.2025	0.9315	0.2904	1		3.31	1.1205	5.4996	0.8556	3.3116	0.8572	0.5908	1.1237		86	100	67	100	92	100
	2859			1-(1-enyl-oleoyl)-GPE (P-18:1)*	LC/MS pos late	44621								0.369237	0.38	0.36	0.96	1.01		0.212	0.8076	0.8813	0.8629	0.8378	0.9998	0.3154	0.9708	0.4377	0.9942	0.9642	1	0.8218	1		1.5486	1.5394	1.5578	1.0609	1.0595	0.5718	0.5823	0.5613		57	75	33	50	42	38
	2861			1-(1-enyl-stearoyl)-GPE (P-18:0)*	LC/MS pos late	39271		HMDB0240598						0.443608	0.65	0.37	1.67	2.92		0.2912	0.8076	0.2074	0.7692	0.716	0.9998	0.627	1	0.3025	0.9942	0.4566	0.9315	0.2998	1		2.1244	1.0845	3.1643	0.8954	2.1714	0.9424	0.7062	1.1785		100	100	100	100	100	100
	2865		Glycerolipid Metabolism	glycerol	LC/MS neg	15122	C00116	HMDB0000131	753					7.31214	5.03	8.98	2.45	1.37		0.0704	0.8076	0.5536	0.8374	0.8852	0.9998	0.236	0.9683	0.1481	0.9942	0.5518	0.954	0.7743	1		0.6827	0.5757	0.7897	1.7358	3.9389	4.992	2.8958	7.0882		100	100	100	100	100	100
	2866			glycerol 3-phosphate	LC/MS pos early	43847	C0093	HMDB0000126	754					0.643949	0.48	0.79	1.88	1.13		0.3217	0.8076	0.4396	0.8374	0.9624	0.9998	0.4726	0.9912	0.4876	0.9942	0.5065	0.9438	0.6421	1		1.5245	1.4334	1.6156	1.0578	1.4484	0.9817	0.6822	1.2812		100	100	100	100	100	100
	2871			glycerophosphoglycerol	LC/MS pos early	48857	C03274	HMDB0240316	54575349					1.54957	1.63	1.46	0.79	0.89		0.2481	0.8076	0.4514	0.8374	0.8055	0.9998	0.5239	0.9954	0.3066	0.9942	0.6788	0.9808	0.5247	1		0.8099	0.859	0.7608	1.1308	0.9341	1.255	1.4025	1.1074		100	100	100	100	100	100
	2873		Monoacylglycerol	1-myristoylglycerol (14:0)	LC/MS neg	35625	C01885	HMDB0011561	10957631					3.70812	1	6.42	6.42	1		0.6342	0.8754	0.6342	0.8374	0.6342	0.9998	1	1	0.4897	0.9942	0.4442	0.9315	1	1		0.0394	0.0394	0.0394	0.0394	0.1461	0.1461	0.0394	0.2529		0	0	0	0	17	15
	2875			1-pentadecanoylglycerol (15:0)	LC/MS neg	47898			190750					1.02179	1	1.04	1.12	1.08		0.9215	0.9084	0.3547	0.8125	0.9215	0.9998	1	1	0.8859	0.9991	0.407	0.9315	0.5948	1		0.8951	0.8609	0.9294	0.8609	0.9488	0.9146	0.8609	0.9683		29	0	67	0	33	15
	2877			1-palmitoleoylglycerol (16:1)*	LC/MS neg	52431		HMDB0011565						1.16708	1	1.33	1.33	1		0.6342	0.8754	0.6342	0.8374	0.6342	0.9998	1	1	0.4897	0.9942	0.4442	0.9315	1	1		0.3992	0.3992	0.3992	0.3992	0.4659	0.4659	0.3992	0.5327		0	0	0	0	17	15
	2880			1-oleoylglycerol (18:1)	LC/MS neg	21184		HMDB0011567	5283468					26.4949	3.21	32.32	40.27	4		0.2562	0.8076	0.2751	0.7906	0.7965	0.9998	0.5382	0.9954	0.3096	0.9942	0.2769	0.9315	0.5885	1		0.827	0.331	1.3231	0.6964	22.0419	21.9113	1.0619	42.7607		57	50	67	63	92	92
	2881			1-linoleoylglycerol (18:2)	LC/MS neg	27447		HMDB0011568	5283469					18.5385	2.84	22.35	32.34	4.11		0.2125	0.8076	0.4917	0.8374	0.9709	0.9998	0.3988	0.9826	0.3448	0.9942	0.5576	0.9547	0.6771	1		1.0922	0.4273	1.7572	0.8209	20.519	20.2477	1.2146	39.2808		57	50	67	75	92	100
	2882			1-linolenoylglycerol (18:3)	LC/MS neg	34393		HMDB0011569	53480978					3.23137	1.07	6.69	3.94	0.63		0.2439	0.8076	0.6147	0.8374	0.2674	0.9998	0.9673	1	0.1048	0.9942	0.1976	0.9315	0.6912	1		0.3583	0.4403	0.2762	0.4547	1.0613	1.1578	0.469	1.8465		29	50	0	38	42	46
	2896			2-oleoylglycerol (18:1)	LC/MS neg	21232		HMDB0011537	5319879					9.3514	1.18	11.15	42.84	4.55		0.7924	0.9065	0.3174	0.8125	0.9461	0.9998	0.893	1	0.8095	0.9984	0.3866	0.9315	0.5486	1		1.6958	0.6112	2.7803	0.6673	16.8866	15.8581	0.7234	30.9929		57	25	100	50	50	46
	2897			2-linoleoylglycerol (18:2)	LC/MS neg	32506		HMDB0011538	5365676					3.18527	0.75	3.46	41.46	8.95		0.8958	0.9084	0.2072	0.7692	0.9208	0.9998	0.8742	1	0.9817	1	0.2692	0.9315	0.4513	1		2.5401	0.5106	4.5695	0.4459	10.1851	8.0909	0.3811	15.8007		57	50	67	63	50	54
	2929		Diacylglycerol	palmitoyl-oleoyl-glycerol (16:0/18:1) [1]*	LC/MS pos late	54943	C13861	HMDB0007102	5282283					5.47165	5.22	5.72	1.13	1.03		0.1259	0.8076	0.9807	0.8763	0.9682	0.9998	0.272	0.9708	0.2681	0.9942	0.9587	1	0.992	1		0.7425	0.7318	0.7532	2.2753	2.53	4.0627	3.8187	4.3068		71	75	67	75	83	85
	2930			palmitoyl-oleoyl-glycerol (16:0/18:1) [2]*	LC/MS pos late	54942	C13861	HMDB0007102	5282283					2.88114	4.03	2.21	0.93	1.7		0.2689	0.8076	0.6775	0.847	0.5692	0.9998	0.2527	0.9708	0.6864	0.9942	0.9002	0.9953	0.5317	1		1.1257	0.8344	1.417	2.0978	2.2713	3.2433	3.3611	3.1255		86	75	100	88	100	100
	2931			palmitoyl-linoleoyl-glycerol (16:0/18:2) [1]*	LC/MS pos late	52633		HMDB0007103	9543695					3.70096	4.8	3.01	0.99	1.58		0.2072	0.8076	0.6624	0.8449	0.7203	0.9998	0.2656	0.9708	0.4986	0.9942	0.949	1	0.6137	1		0.7845	0.6079	0.9611	1.7615	1.9264	2.9034	2.9152	2.8917		100	100	100	100	100	100
	2932			palmitoyl-linoleoyl-glycerol (16:0/18:2) [2]*	LC/MS pos late	52634		HMDB0007103	131801744					1.75888	3.42	1.11	0.82	2.55		0.382	0.8361	0.4709	0.8374	0.3186	0.9998	0.2037	0.9488	0.9255	1	0.8171	0.9938	0.2773	1		1.469	0.8285	2.1094	1.8319	2.2209	2.5838	2.8353	2.3323		100	100	100	100	100	100
	2933			palmitoyl-linolenoyl-glycerol (16:0/18:3) [2]*	LC/MS pos late	54965		HMDB0007104 HMDB0007105	348277338;348277337					2.1186	2.28	1.75	0.33	0.44		0.2485	0.8076	0.4225	0.8374	0.551	0.9998	0.2323	0.9643	0.6736	0.9942	0.2638	0.9315	0.8934	1		1.4443	2.0115	0.8771	3.2983	1.206	3.0599	4.585	1.5349		86	75	100	88	83	85
	2948			oleoyl-oleoyl-glycerol (18:1/18:1) [1]*	LC/MS pos late	54945		HMDB0007218	9543716					10.567	14.35	8.35	0.99	1.71		0.2536	0.8076	0.8929	0.8629	0.451	0.9998	0.1974	0.9488	0.7679	0.9984	0.6142	0.9648	0.5709	1		0.7831	0.5789	0.9872	4.4429	4.6152	8.275	8.3068	8.2432		86	75	100	88	92	92
	2951			oleoyl-linoleoyl-glycerol (18:1/18:2) [1]	LC/MS pos late	46798		HMDB0007219	14275396					8.07201	8.64	7.62	1.11	1.26		0.1452	0.8076	0.8638	0.8629	0.6307	0.9998	0.1838	0.9488	0.4588	0.9942	0.8017	0.9938	0.6781	1		1.0415	0.92	1.163	4.4351	5.0134	8.407	7.9502	8.8638		86	75	100	88	100	100
	2952			oleoyl-linoleoyl-glycerol (18:1/18:2) [2]	LC/MS pos late	46799		HMDB0007219	71433693					2.90052	4.91	1.98	0.89	2.19		0.2921	0.8076	0.6437	0.8374	0.3346	0.9998	0.1713	0.9488	0.946	1	0.6777	0.9808	0.3647	1		1.5913	0.997	2.1856	2.9453	3.2616	4.6156	4.8936	4.3376		100	100	100	100	100	100
	2956			linoleoyl-linoleoyl-glycerol (18:2/18:2) [1]*	LC/MS pos late	54968		HMDB0007248	9543729					4.30386	6.09	3.03	0.7	1.41		0.1749	0.8076	0.6852	0.8476	0.486	0.9998	0.1621	0.9488	0.6136	0.9942	0.8112	0.9938	0.4841	1		0.674	0.5599	0.788	1.9851	1.5897	2.9008	3.4102	2.3914		86	75	100	88	100	100
	2957			linoleoyl-linoleoyl-glycerol (18:2/18:2) [2]*	LC/MS pos late	54969		HMDB0007248	9543729					1.77563	3.22	1.01	0.6	1.9		0.2577	0.8076	0.5178	0.8374	0.2671	0.9998	0.1299	0.9488	0.9864	1	0.698	0.9935	0.2661	1		1.9909	1.3747	2.6071	2.9037	2.6223	3.5351	4.4326	2.6375		100	100	100	100	100	100
	2958			linoleoyl-linolenoyl-glycerol (18:2/18:3) [1]*	LC/MS pos late	54963		HMDB0007249	14275409					4.33651	3.87	7.55	0.29	0.15		0.3622	0.8201	0.3847	0.8298	0.9209	0.9998	0.4856	0.9912	0.5504	0.9942	0.433	0.9315	0.6208	1		2.7176	4.7413	0.6939	11.5343	2.9682	11.7849	18.3273	5.2424		100	100	100	100	100	100
	2959			linoleoyl-linolenoyl-glycerol (18:2/18:3) [2]*	LC/MS pos late	54964		HMDB0007250	9543737					2.05526	2.15	1.74	0.23	0.29		0.4307	0.8361	0.7071	0.8476	0.4224	0.9998	0.2787	0.9708	0.9915	1	0.344	0.9315	0.7828	1		3.9032	6.0602	1.7462	9.5302	2.3952	8.0221	13.0001	3.0442		86	75	100	88	100	100
	2960			linolenoyl-linolenoyl-glycerol (18:3/18:3) [1]*	LC/MS pos late	54951								3.48068	3.03	8.4	0.25	0.09		0.2392	0.8076	0.3039	0.8055	0.8048	0.9998	0.3262	0.9708	0.4891	0.9942	0.304	0.9315	0.6129	1		3.7842	6.9365	0.632	13.9856	2.9703	13.1716	21.0348	5.3085		86	75	100	88	92	92
	2961			linolenoyl-linolenoyl-glycerol (18:3/18:3) [2]*	LC/MS pos late	54952		HMDB0007278	14275411					1.88797	1.7	9.75	0.14	0.02		0.6355	0.8754	0.1626	0.7336	0.7802	0.9998	0.8927	1	0.5839	0.9942	0.3542	0.9315	0.2826	1		20.8278	40.6922	0.9634	54.9699	5.1802	39.3222	69.2475	9.3969		100	100	100	100	83	85
	2993		Galactosyl Glycerolipids	galactosylglycerol	LC/MS polar	57345	C05401	HMDB0006790	16048618					2.52065	3.41	2.15	1.49	2.37		0.1396	0.8076	0.3097	0.8082	0.6187	0.9998	0.1756	0.9488	0.4564	0.9942	0.6672	0.9808	0.3367	1		0.8401	0.4989	1.1812	1.0988	1.8589	2.1176	1.6988	2.5365		71	50	100	75	92	92
	2994			digalactosylglycerol*	LC/MS neg	57346								3.169	4.63	1.71	0.37	1		0.2357	0.8076	0.5381	0.8374	0.5381	0.9998	0.2191	0.9622	0.6661	0.9942	0.324	0.9315	1	1		0.1355	0.1355	0.1355	0.3814	0.1835	0.4294	0.6273	0.2316		0	0	0	13	17	23
	2996			1-palmitoyl-2-linoleoyl-digalactosylglycerol (16:0/18:2)*	LC/MS pos late	54887								35.788	66.22	8.39	0.14	1.11		0.0336	0.8076	0.7917	0.861	0.6743	0.9998	0.0768	0.9488	0.1858	0.9942	0.581	0.9599	0.9205	1		0.5896	0.5587	0.6205	18.7773	2.913	21.1006	36.9959	5.2054		43	25	67	63	83	92
	2997			1-palmitoyl-2-linoleoyl-galactosylglycerol (16:0/18:2)*	LC/MS pos late	54901								8.99349	29.47	2.31	0.24	3.06		0.0596	0.8076	0.9462	0.8674	0.1449	0.9998	0.0264	0.7592	0.723	0.9976	0.2538	0.9315	0.3235	1		0.5066	0.2493	0.7639	3.798	1.2646	4.5561	7.3468	1.7653		29	0	67	50	75	85
	2999			1-palmitoyl-2-linolenoyl-digalactosylglycerol (16:0/18:3)	LC/MS pos late	54893								7.96015	6.6	9.48	1.28	0.89		0.2107	0.8076	0.9821	0.8763	0.8925	0.9998	0.4345	0.9897	0.3091	0.9942	0.9274	0.9953	0.9201	1		0.1556	0.1646	0.1467	0.6259	0.7684	1.2386	1.0871	1.3901		14	25	0	25	33	38
	3001			1-linolenoyl-2-hexadecatrienoyl-galactosylglycerol (18:3/16:3)	LC/MS pos late	54890								2.21056	0.44	11.15	5.01	0.2		0.6603	0.8856	0.7391	0.8527	0.459	0.9998	0.8334	1	0.3922	0.9942	0.7386	0.9938	0.4949	1		0.549	0.9166	0.1814	0.6602	1.1023	1.2136	0.4039	2.0233		14	25	0	38	33	46
	3004			1,2-dilinoleoyl-digalactosylglycerol (18:2/18:2)*	LC/MS pos late	54897								32.2266	61.59	2.86	0.05	1		0.0843	0.8076	0.4651	0.8374	0.4651	0.9998	0.0942	0.9488	0.4377	0.9942	0.2438	0.9315	1	1		0.3455	0.3455	0.3455	10.8128	0.6671	11.1343	21.28	0.9886		14	0	33	38	42	54
	3005			1,2-dilinoleoyl-galactosylglycerol (18:2/18:2)*	LC/MS pos late	54899			6535011					38.2637	57.3	3.17	0.03	0.54		0.1377	0.8076	0.2217	0.7692	0.572	0.9998	0.1609	0.9488	0.483	0.9942	0.1545	0.9157	0.6645	1		0.5077	0.6583	0.3571	19.19	0.7443	19.4265	37.7217	1.1314		43	50	33	63	50	62
	3006			1-linoleoyl-2-linolenoyl-galactosylglycerol (18:2/18:3)*	LC/MS pos late	54898								24.2707	28.76	7.75	0.07	0.27		0.1476	0.8076	0.2	0.7638	0.877	0.9998	0.2656	0.9708	0.3348	0.9942	0.2446	0.9315	0.4639	1		0.3288	0.517	0.1407	7.6935	0.6155	7.9802	14.87	1.0903		29	50	0	63	42	62
	3007			1-linoleoyl-2-linolenoyl-digalactosylglycerol (18:2/18:3)*	LC/MS pos late	54896								7.70427	13.69	1.72	0.13	1		0.1425	0.8076	0.5336	0.8374	0.5336	0.9998	0.1538	0.9488	0.5183	0.9942	0.3188	0.9315	1	1		0.3936	0.3936	0.3936	2.8908	0.5352	3.0324	5.388	0.6768		0	0	0	25	33	46
	3008			1,2-dilinolenoyl-galactosylglycerol (18:3/18:3)*	LC/MS pos late	54891	C13871		5282287					7.23134	1.38	63.67	4.78	0.1		0.3054	0.8076	0.5688	0.8374	0.388	0.9998	0.9078	1	0.1752	0.9942	0.8079	0.9938	0.3638	1		0.6458	1.1704	0.1213	1.3939	3.922	4.67	1.6173	7.7227		29	50	0	75	50	77
	3009			1,2-dilinolenoyl-digalactosylglycerol (18:3/18:3)	LC/MS pos late	54892		HMDB0011127	53480666					8.32276	1.95	16.82	6.47	0.75		0.2918	0.8076	0.7608	0.855	0.5314	0.9998	0.7608	1	0.2254	0.9942	0.4539	0.9315	0.8364	1		0.1577	0.1801	0.1352	0.2658	1.2044	1.3125	0.3514	2.2737		14	25	0	38	33	46
	3010			1-palmitoyl-galactosylglycerol (16:0)*	LC/MS neg	62372			10413348					2.75931	11.1	1.44	0.82	6.33		0.0351	0.8076	0.1331	0.7149	0.0241	0.9998	0.0046	0.6867	0.8923	0.9991	0.4735	0.9315	0.0197	1		0.6228	0.17	1.0755	1.0283	1.3129	1.7185	1.8866	1.5503		86	75	100	88	100	100
	3011			2-palmitoyl-galactosylglycerol (16:0)*	LC/MS neg	62373								2.9847	11.96	1.45	0.71	5.87		0.0273	0.7678	0.5474	0.8374	0.1327	0.9998	0.014	0.6867	0.5472	0.9942	0.4445	0.9315	0.1809	1		0.6015	0.1752	1.0278	1.1355	1.2613	1.7953	2.0958	1.4949		71	75	67	88	92	100
	3016			1-linolenoyl-galactosylglycerol (18:3)*	LC/MS pos late	62364			11497202					5.20184	3.39	7.23	1.9	0.89		0.1989	0.8076	0.631	0.8374	0.7836	0.9998	0.2822	0.9708	0.4507	0.9942	0.5428	0.9523	0.8952	1		0.6099	0.645	0.5747	1.417	2.3655	3.1726	2.1889	4.1563		29	50	0	50	33	46
	3018			1-palmitoyl-digalactosylglycerol (16:0)*	LC/MS neg	62374								3.25476	3.88	2.63	0.68	1		0.151	0.8076	0.9553	0.8677	0.9553	0.9998	0.298	0.9708	0.3058	0.9942	0.9278	0.9953	1	1		0.1837	0.1837	0.1837	0.4486	0.333	0.5979	0.7136	0.4823		14	0	33	13	33	31
	3024		Sphingolipid Synthesis	3-ketosphinganine	LC/MS pos late	34381	C02934	HMDB01480	631					0.636797	1.14	0.45	1.05	2.66		0.1793	0.8076	0.6304	0.8374	0.2047	0.9998	0.9557	1	0.0643	0.9942	0.5109	0.9438	0.2657	1		1.3425	0.7344	1.9506	0.784	1.4134	0.8549	0.8336	0.8762		100	100	100	100	75	77
	3025			sphinganine	LC/MS pos late	17769	C00836	HMDB0000269	3126					0.709419	0.29	1.06	4.27	1.17		0.4882	0.8549	0.2908	0.8055	0.2678	0.9998	0.22	0.9622	0.7535	0.9984	0.0889	0.8655	0.9722	1		2.2486	2.0678	2.4293	1.3364	2.5074	1.5952	0.6049	2.5855		100	100	100	100	100	100
	3027			sphingadienine	LC/MS pos late	57426			6449795					3.15081	1.28	3.54	13.21	4.76		0.1161	0.8076	0.0906	0.6985	0.2775	0.9998	0.7168	1	0.0593	0.9942	0.031	0.678	0.6726	1		0.9336	0.3241	1.5432	0.369	3.5062	2.9416	0.414	5.4692		57	75	33	88	83	100
	3028			phytosphingosine	LC/MS pos late	1510	C12144	HMDB0004610	122121					2.7708	3.5	2.51	1.97	2.75		0.0612	0.8076	0.1374	0.7149	0.5749	0.9998	0.0946	0.9488	0.3092	0.9942	0.4345	0.9315	0.1929	1		0.9171	0.4894	1.3447	1.1008	2.3574	2.5411	1.7122	3.3701		100	100	100	100	100	100
	3029			dehydrophytosphingosine*	LC/MS pos late	63037		HMDB0038057	14757418					4.42278	6.33	3.59	1.3	2.29		0.0346	0.8076	0.4438	0.8374	0.5458	0.9998	0.0615	0.9488	0.2352	0.9942	0.8936	0.9953	0.3855	1		0.4908	0.2981	0.6835	1.0924	1.569	2.1707	1.8867	2.4546		57	50	67	75	83	92
	3031			hexadecasphinganine (d16:0)*	LC/MS pos late	57544	C13915		656816					0.830646	0.69	0.89	2.89	2.24		0.9911	0.9214	0.22	0.7692	0.4948	0.9998	0.6322	1	0.6232	0.9942	0.1298	0.9088	0.718	1		2.0153	1.244	2.7867	1.0524	2.6369	1.674	0.8608	2.4871		100	100	100	100	100	100
	3032			1-deoxysphinganine (m18:0)	LC/MS pos late	64528			9925886					0.564123	0.63	0.52	1.38	1.65		0.3535	0.8131	0.3407	0.8125	0.9932	0.9998	0.517	0.9944	0.5	0.9942	0.4348	0.9315	0.5444	1		1.7365	1.3092	2.1638	1.0664	1.6497	0.9796	0.8236	1.1356		100	100	100	100	100	100
	3034		Dihydroceramides	N-palmitoyl-sphinganine (d18:0/16:0)	LC/MS pos late	52604		HMDB11760	5283572					1.22664	1.15	1.27	2.23	2.02		0.8921	0.9084	0.1117	0.6985	0.9132	0.9998	0.9853	1	0.8585	0.9984	0.1661	0.9157	0.3319	1		1.096	0.7258	1.4661	0.7788	1.6615	1.3444	0.8318	1.857		100	100	100	100	100	100
	3036			N-palmitoyl-phytosphingosine (t18:0/16:0)	LC/MS pos late	62881		HMDB0010697	10506988					1.38093	1.58	1.2	0.84	1.11		0.3215	0.8076	0.7625	0.855	0.4361	0.9998	0.2286	0.9643	0.8722	0.9984	0.3843	0.9315	0.7586	1		1.0225	0.9682	1.0767	1.2506	1.1839	1.412	1.5329	1.291		100	100	100	100	100	100
	3037			N-stearoyl-sphinganine (d18:0/18:0)*	LC/MS pos late	1759		HMDB0011761	5283573					0.70909	0.14	1.04	12.4	1.73		0.2562	0.8076	0.0133	0.4844	0.4466	0.9998	0.1973	0.9488	0.7758	0.9984	0.0109	0.4792	0.2209	1		2.0649	1.5126	2.6171	0.8656	2.6634	1.4642	0.2186	2.7097		100	100	100	88	100	92
	3045		Ceramides	N-pentadecanoyl-sphingosine (d18:1/15:0)*	LC/MS pos late	57431								1.77626	1.37	2.08	2.06	1.36		0.9754	0.9214	0.4198	0.8374	0.5004	0.9998	0.6571	1	0.6065	0.9942	0.2375	0.9315	0.9308	1		0.8711	0.7389	1.0032	0.8744	1.544	1.5473	1.0098	2.0848		71	75	67	50	83	69
	3046			N-palmitoyl-sphingosine (d18:1/16:0)	LC/MS pos late	44877		HMDB0004949	5283564					1.54179	2.92	1.29	2.44	5.52		0.4502	0.841	0.0281	0.5251	0.8285	0.9998	0.5043	0.9912	0.6918	0.9942	0.095	0.8655	0.1131	1		1.5831	0.4856	2.6806	0.9516	3.0724	2.4408	1.4176	3.4641		100	100	100	100	100	100
	3048			N-(2-hydroxypalmitoyl)-sphingosine (d18:1/16:0(2OH))	LC/MS pos late	57697			72715801					2.32024	6.76	1.28	0.81	4.27		0.1831	0.8076	0.0641	0.6384	0.202	0.9998	0.0798	0.9488	0.9651	1	0.6019	0.9613	0.0508	1		0.7763	0.2945	1.2581	1.142	1.4355	1.8012	1.9894	1.6129		100	100	100	100	100	100
	3050			N-stearoyl-sphingosine (d18:1/18:0)*	LC/MS pos late	54979		HMDB0004950	5283565					1.68099	0.53	1.89	19.71	5.53		0.8103	0.9084	0.0326	0.5362	0.606	0.9998	0.6039	0.9981	0.8396	0.9984	0.0341	0.68	0.2656	1		0.7122	0.2182	1.2062	0.1669	1.7425	1.1972	0.1156	2.2787		71	75	67	63	67	62
	3051			N-oleoyl-sphingosine (d18:1/18:1)*	LC/MS pos late	19385		HMDB0004948	5283563					3.59943	1.11	4.18	16.26	4.3		0.1725	0.8076	0.0206	0.525	0.3856	0.9998	0.7175	1	0.1102	0.9942	0.0129	0.5241	0.3016	1		0.8021	0.3024	1.3017	0.3184	3.3707	2.8871	0.3345	5.4397		71	75	67	75	83	85
	3072			ceramide (d18:1/14:0, d16:1/16:0)*	LC/MS pos late	57432		HMDB0011773 HMDB0240681						0.545582	1.23	0.48	3.92	10.06		0.9957	0.9214	0.0368	0.5433	0.9994	0.9998	0.9966	1	0.9973	1	0.0839	0.8515	0.1666	1		2.3496	0.425	4.2743	0.4731	3.1584	1.2819	0.5212	2.0425		57	50	67	38	92	77
	3075			ceramide (d18:1/20:0, d16:1/22:0, d20:1/18:0)*	LC/MS pos late	57440		HMDB0240684 HMDB0004951 HMDB0240682						1.05024	1	1.07	2.46	2.3		0.9086	0.9084	0.041	0.5456	0.9086	0.9998	1	1	0.8671	0.9984	0.0767	0.8348	0.1989	1		0.7863	0.4768	1.0958	0.4768	1.1353	0.8258	0.4768	1.1748		29	0	67	13	67	54
	3077			ceramide (d18:2/24:1, d18:1/24:2)*	LC/MS pos late	57443		HMDB0240679 HMDB0240680						1.07105	1.52	0.91	1.61	2.71		0.5477	0.8721	0.1178	0.6985	0.7749	0.9998	0.5427	0.9954	0.8167	0.9984	0.287	0.9315	0.234	1		0.6531	0.352	0.9542	0.4436	0.909	0.6995	0.5353	0.8637		29	0	67	13	67	54
	3078			ceramide (d18:2/16:0, d18:1/16:1, d16:1/18:1)*	LC/MS pos late	65035								1.28963	1.55	1.23	3.64	4.56		0.5634	0.8754	0.0417	0.5456	0.952	0.9998	0.6606	1	0.7049	0.9942	0.1009	0.8742	0.167	1		0.6163	0.2215	1.011	0.2822	1.1289	0.7948	0.3429	1.2468		43	25	67	25	75	62
	3083		Hexosylceramides (HCER)	glycosyl-N-palmitoyl-sphingosine (d18:1/16:0)	LC/MS pos late	53013								0.804982	1.77	0.64	2.17	5.97		0.8358	0.9084	0.0366	0.5433	0.344	0.9998	0.6066	0.9981	0.4002	0.9942	0.3065	0.9315	0.0548	1		1.6219	0.4656	2.7783	0.6452	2.2824	1.3056	0.8247	1.7865		86	75	100	75	92	85
	3084			glycosyl-N-stearoyl-sphingosine (d18:1/18:0)	LC/MS pos late	52234								1.41773	0.58	1.53	19.97	7.51		0.7898	0.9063	0.0095	0.4823	0.7681	0.9998	0.7	1	0.9835	1	0.0183	0.5635	0.1115	1		0.6825	0.1603	1.2046	0.1263	1.5238	0.9676	0.0923	1.8429		43	25	67	13	83	62
	3090			glycosyl-N-(2-hydroxynervonoyl)-sphingosine (d18:1/24:1(2OH))*	LC/MS pos late	57444								0.8585	3.86	0.53	1.25	9.12		0.9754	0.9214	0.1407	0.7221	0.3447	0.9998	0.4997	0.9912	0.502	0.9942	0.6475	0.9784	0.1279	1		1.3689	0.2704	2.4673	0.6573	1.8868	1.1752	1.0441	1.3064		43	25	67	25	67	54
	3104			glycosyl ceramide (d18:1/20:0, d16:1/22:0)*	LC/MS pos late	57595								0.7398	1	0.67	2.69	3.99		0.3396	0.8101	0.0411	0.5456	0.3396	0.9998	1	1	0.1706	0.9942	0.3322	0.9315	0.0583	1		0.8186	0.3282	1.309	0.3282	1.096	0.6056	0.3282	0.8829		43	25	67	13	42	23
	3113		Lactosylceramides (LCER)	lactosyl-N-palmitoyl-sphingosine (d18:1/16:0)	LC/MS pos late	53010		HMDB0006750	53477895					1.42859	2.46	1.23	2.56	5.13		0.991	0.9214	0.2092	0.7692	0.5358	0.9998	0.6639	1	0.6567	0.9942	0.5925	0.9599	0.2347	1		0.8563	0.2796	1.4331	0.4836	1.5961	1.2233	0.6876	1.7591		57	50	67	50	58	54
	3114			lactosyl-N-stearoyl-sphingosine (d18:1/18:0)*	LC/MS pos late	54980		HMDB0011591	10260120					1.30536	1	1.61	1.61	1		0.6342	0.8754	0.6342	0.8374	0.6342	0.9998	1	1	0.4897	0.9942	0.4442	0.9315	1	1		0.2669	0.2669	0.2669	0.2669	0.3484	0.3484	0.2669	0.4298		14	0	33	0	17	8
	3116			lactosyl-N-behenoyl-sphingosine (d18:1/22:0)*	LC/MS pos late	57422		HMDB0011594	44260143					1.06216	1	1.08	4.13	3.83		0.8683	0.9084	0.1412	0.7221	0.8683	0.9998	1	1	0.8091	0.9984	0.2812	0.9315	0.291	1		0.7191	0.2975	1.1407	0.2975	1.1854	0.7638	0.2975	1.23		14	0	33	0	42	31
	3117			lactosyl-N-nervonoyl-sphingosine (d18:1/24:1)*	LC/MS pos late	57370		HMDB0004872						1.50873	2.1	1.36	2.56	3.96		0.8799	0.9084	0.4215	0.8374	0.5081	0.9998	0.5761	0.9954	0.7079	0.9942	0.9062	0.9953	0.3535	1		0.4582	0.1846	0.7318	0.2865	0.8629	0.6913	0.3884	0.9941		14	0	33	13	33	31
	3125		Dihydrosphingomyelins	palmitoyl dihydrosphingomyelin (d18:0/16:0)*	LC/MS pos late	52434		HMDB0010168	9939965					1.30636	2.66	0.86	1	3.07		0.7218	0.8894	0.135	0.7149	0.5901	0.9998	0.5397	0.9954	0.8931	0.9991	0.4195	0.9315	0.1954	1		1.0997	0.5408	1.6585	0.9899	1.5464	1.4366	1.4389	1.4342		86	75	100	88	100	100
	3129		Sphingomyelins	palmitoyl sphingomyelin (d18:1/16:0)	LC/MS pos late	37506		HMDB0010169	9939941					0.814634	1.61	0.56	1.06	3.09		0.8283	0.9084	0.3774	0.8296	0.3825	0.9998	0.6478	1	0.4269	0.9942	0.9938	1	0.2675	1		1.6222	0.7938	2.4505	1.0374	1.9062	1.3215	1.281	1.362		100	100	100	100	100	100
	3131			stearoyl sphingomyelin (d18:1/18:0)	LC/MS pos late	19503	C00550	HMDB0001348	6453725					1.27686	1.14	1.41	1.27	1.03		0.1906	0.8076	0.4573	0.8374	0.5727	0.9998	0.5944	0.9981	0.176	0.9942	0.2954	0.9315	0.9074	1		0.6487	0.6399	0.6574	0.6849	0.792	0.8283	0.7299	0.9266		14	0	33	25	42	46
	3139			sphingomyelin (d18:1/14:0, d16:1/16:0)*	LC/MS pos late	42463		HMDB0012097	11433862					0.420613	0.1	1.21	5.25	0.41		0.0417	0.8076	0.683	0.8475	0.0136	0.9998	0.0035	0.6867	0.6906	0.9942	0.0203	0.5843	0.1536	1		1.7251	2.4397	1.0105	1.3359	1.1147	0.7256	0.2322	1.219		86	100	67	75	83	77
	3185		Sphingosines	sphingosine	LC/MS pos late	17747	C00319	HMDB0000252	5280335					2.34205	0.38	3.04	22.13	2.8		0.9422	0.9169	0.0112	0.4823	0.0895	0.9998	0.2508	0.9708	0.1893	0.9942	0.0016	0.3397	0.5098	1		1.5106	0.7946	2.2266	0.5502	4.4983	3.5379	0.3059	6.77		100	100	100	100	100	100
	3188			N-acetylsphingosine	LC/MS neg	17772	C00195	HMDB04950	5497136					0.483571	1.09	0.45	7.12	17.34		0.6821	0.8894	0.0219	0.525	0.5863	0.9998	0.9255	1	0.4886	0.9942	0.1283	0.9088	0.0666	1		1.2143	0.1324	2.2963	0.1386	1.663	0.5872	0.1447	1.0298		29	0	67	13	67	54
	3193			hexadecasphingosine (d16:1)*	LC/MS pos late	57428			14767871					0.410013	0.31	0.42	11.65	8.69		0.7981	0.9084	0.076	0.6635	0.3806	0.9998	0.4364	0.9897	0.6463	0.9942	0.0379	0.68	0.5355	1		3.9828	0.8221	7.1434	0.5401	5.0757	1.633	0.2581	3.0079		71	75	67	75	83	85
	3194			heptadecasphingosine (d17:1)	LC/MS pos late	57427			5283557					0.652516	0.05	1.55	22.26	0.67		0.2659	0.8076	0.1845	0.7555	0.0816	0.9998	0.0551	0.9488	0.6141	0.9942	0.0184	0.5635	0.7681	1		2.1742	2.5999	1.7486	1.3609	2.232	1.4187	0.122	2.7154		100	100	100	75	100	85
	3195			eicosanoylsphingosine (d20:1)*	LC/MS pos late	57597								0.539769	0.27	0.67	5.25	2.13		0.2305	0.8076	0.0239	0.525	0.5689	0.9998	0.227	0.9643	0.6345	0.9942	0.0242	0.619	0.241	1		2.0468	1.3065	2.7871	0.8299	2.3218	1.1048	0.3533	1.8564		100	100	100	100	100	100
	3201		Mevalonate Metabolism	3-hydroxy-3-methylglutarate	LC/MS polar	531	C03761	HMDB0000355	1662;5459993					1.2925	1.65	1.17	2.06	2.91		0.7124	0.8894	0.0771	0.6635	0.3476	0.9998	0.3698	0.9721	0.6716	0.9942	0.4669	0.9315	0.0879	1		1.2547	0.6417	1.8677	0.8503	2.0261	1.6217	1.0588	2.1845		100	100	100	100	100	100
	3203			mevalonate	LC/MS polar	39583	C02104	HMDB0000227	449					4.18595	8.03	1.79	0.36	1.61		0.1707	0.8076	0.9843	0.8766	0.3242	0.9998	0.1115	0.9488	0.7651	0.9984	0.414	0.9315	0.5347	1		0.9508	0.7295	1.172	3.294	1.6368	3.98	5.8584	2.1016		100	100	100	100	100	100
	3215		Sterol	lanosterol	LC/MS pos late	1128	C08624 C01724	HMDB0001251	246983					0.599545	0.57	0.63	1.21	1.1		0.222	0.8076	0.7371	0.8527	0.876	0.9998	0.4559	0.9912	0.3131	0.9942	0.8842	0.9953	0.7545	1		1.7138	1.6292	1.7984	1.2798	1.4615	1.0275	0.9304	1.1246		100	100	100	100	100	100
	3218			cholesterol	LC/MS pos late	63	C00187	HMDB0000067	6432564;11025495;5997					0.609685	0.6	0.62	1.84	1.77		0.2264	0.8076	0.1606	0.7336	0.6246	0.9998	0.609	0.9981	0.2185	0.9942	0.4433	0.9315	0.2281	1		1.3712	0.9889	1.7534	0.7889	1.4182	0.836	0.5889	1.083		100	100	100	100	100	100
	3219			cholesterol sulfate	LC/MS polar	35324	C18043	HMDB00653 HMDB0000653	65076					0.786163	0.69	0.9	1.12	0.86		0.1315	0.8076	0.8146	0.8616	0.4106	0.9998	0.1138	0.9488	0.5947	0.9942	0.394	0.9315	0.7047	1		1.2748	1.3715	1.1781	1.1592	1.1179	1.0022	0.9468	1.0576		100	100	100	100	100	100
	3228			25-hydroxycholesterol sulfate	LC/MS polar	64194			11705729					0.525182	0.46	0.58	1.51	1.2		0.0552	0.8076	0.4338	0.8374	0.445	0.9998	0.0677	0.9488	0.3629	0.9942	0.2179	0.9315	0.9901	1		1.6063	1.4619	1.7507	1.0674	1.3825	0.8436	0.6729	1.0143		100	100	100	100	100	100
	3235			3beta-hydroxy-5-cholestenoate	LC/MS neg	54805	C17333	HMDB0012453	165511					0.464281	1.2	0.32	1.35	5.08		0.085	0.8076	0.0057	0.4823	0.0227	0.9998	0.6442	1	0.0059	0.9942	0.5957	0.9613	0.0022	0.7221		1.6406	0.5394	2.7418	0.5932	1.8091	0.7617	0.6471	0.8764		57	25	100	38	50	38
	3236			7-ketocholesterol	LC/MS pos late	34188		HMDB0000501	91474					1.00048	0.83	1.13	1.7	1.25		0.9784	0.9214	0.1703	0.7407	0.6666	0.9998	0.7527	1	0.7681	0.9984	0.149	0.9157	0.5348	1		1.0392	0.923	1.1554	0.8464	1.2325	1.0397	0.7698	1.3096		100	100	100	100	100	100
	3239			coprostanol	LC/MS pos late	45986		HMDB0000577	221122					0.782722	0.6	1.17	0.89	0.46		0.3276	0.8076	0.1163	0.6985	0.4781	0.9998	0.2502	0.9708	0.839	0.9984	0.461	0.9315	0.1484	1		1.0765	1.4744	0.6786	1.1826	0.7365	0.8426	0.8908	0.7945		100	100	100	88	83	77
	3245			4-cholesten-3-one	LC/MS pos late	38125	C00599	HMDB0000921	91477					1.2815	1.13	1.34	3.07	2.58		0.5135	0.8612	0.2146	0.7692	0.7763	0.9998	0.7978	1	0.4954	0.9942	0.4291	0.9315	0.3293	1		1.2856	0.718	1.8531	0.7633	2.1697	1.6475	0.8086	2.4863		100	100	100	100	100	100
	3247			beta-sitosterol	LC/MS pos late	27414	C01753	HMDB0000852	222284					0.720619	0.76	0.68	0.84	0.93		0.656	0.8843	0.7225	0.8517	0.5341	0.9998	0.9023	1	0.4388	0.9942	0.8274	0.9938	0.5349	1		1.5903	1.6493	1.5312	1.4479	1.2884	1.146	1.2465	1.0456		100	100	100	100	100	100
	3248			stigmasterol	LC/MS pos late	21183	C05442	HMDB0000937	5280794					0.615246	0.63	0.6	1.02	1.05		0.4753	0.8485	0.4514	0.8374	0.537	0.9998	0.946	1	0.3356	0.9942	0.9107	0.9953	0.3854	1		1.3892	1.3523	1.4261	1.1003	1.1436	0.8547	0.8483	0.8612		71	50	100	63	92	85
	3249			stigmastadienone	LC/MS pos late	63060			249915307					0.886279	0.72	1	2.13	1.53		0.447	0.839	0.2381	0.7692	0.9429	0.9998	0.5662	0.9954	0.6134	0.9942	0.3095	0.9315	0.4739	1		1.4219	1.124	1.7199	0.9643	1.7179	1.2602	0.8045	1.7159		100	100	100	100	100	100
	3250			campesterol	LC/MS pos late	33997	C01789	HMDB0002869	173183					0.907203	1.02	0.82	1.04	1.31		0.5657	0.8754	0.6891	0.8476	0.5618	0.9998	0.9968	1	0.4028	0.9942	0.8829	0.9953	0.5337	1		1.2953	1.1227	1.4679	1.1367	1.3337	1.1751	1.1506	1.1995		100	100	100	100	100	100
	3254			ergosterol	LC/MS pos late	27553	C01694	HMDB0000878	444679					0.861034	1.96	0.67	1.95	5.72		0.8238	0.9084	0.0766	0.6635	0.6155	0.9998	0.8467	1	0.5978	0.9942	0.2808	0.9315	0.1455	1		1.2226	0.3639	2.0812	0.5385	1.7368	1.0527	0.7131	1.3924		57	50	67	50	75	69
	3273		Pregnenolone Steroids	pregnenolone sulfate	LC/MS neg	38170	C18044	HMDB0000774	105074					0.137977	0.17	0.13	1.84	2.5		0.0721	0.8076	0.6117	0.8374	0.7326	0.9998	0.1378	0.9488	0.2669	0.9942	0.4941	0.9385	0.9152	1		2.7635	1.5778	3.9492	0.9229	2.2218	0.3813	0.2681	0.4944		57	50	67	25	50	31
	3284			21-hydroxypregnanolone monosulfate (1)	LC/MS neg	62311								0.201932	0.06	0.39	4.94	0.76		0.1861	0.8076	0.6369	0.8374	0.2602	0.9998	0.099	0.9488	0.8779	0.9991	0.2012	0.9315	0.6683	1		2.0809	2.3632	1.7986	1.2524	1.2487	0.4202	0.1416	0.6988		57	50	67	38	67	54
	3289			pregnenediol sulfate (C21H34O5S)*	LC/MS neg	32619	C18044	HMDB0000774	105074					0.115118	0.01	0.17	20.24	1.72		0.0844	0.8076	0.2974	0.8055	0.6046	0.9998	0.1232	0.9488	0.3532	0.9942	0.2127	0.9315	0.7315	1		1.6418	1.2055	2.0781	0.6117	1.2192	0.189	0.0178	0.3603		57	50	67	38	50	38
	3290			pregnenediol disulfate (C21H34O8S2)*	LC/MS neg	32562								0.0621295	0.01	0.07	38.65	4.42		0.0819	0.8076	0.2335	0.7692	0.7071	0.9998	0.1434	0.9488	0.2985	0.9942	0.2085	0.9315	0.5936	1		3.5088	1.2945	5.723	0.6528	3.074	0.218	0.011	0.4251		57	50	67	25	58	38
	3291			pregnenetriol sulfate*	LC/MS neg	62922			129671303					0.150983	0.04	0.21	9.32	1.95		0.1601	0.8076	0.611	0.8374	0.4862	0.9998	0.1525	0.9488	0.5872	0.9942	0.3341	0.9315	0.9033	1		1.2061	0.8182	1.594	0.4267	0.9615	0.1821	0.0353	0.329		57	50	67	25	50	31
	3292			pregnenetriol disulfate*	LC/MS neg	62921								0.147249	0	0.22	108.84	1.9		0.1448	0.8076	0.3216	0.8125	0.4901	0.9998	0.1434	0.9488	0.5553	0.9942	0.1812	0.9315	0.843	1		1.1939	0.822	1.5658	0.4126	0.9571	0.1758	0.0032	0.3483		57	50	67	25	58	38
	3301		Progestin Steroids	5alpha-pregnan-3beta,20beta-diol monosulfate (1)	LC/MS neg	37196		HMDB0240580						0.212455	0.06	1.17	3.41	0.16		0.3447	0.8101	0.7906	0.861	0.5838	0.9998	0.3078	0.9708	0.7664	0.9984	0.8181	0.9938	0.6051	1		4.3628	7.4961	1.2294	3.9581	1.3315	0.9269	0.4202	1.4337		71	75	67	63	58	54
	3303			5alpha-pregnan-3beta,20alpha-diol monosulfate (1)	LC/MS neg	37199								0.583035	0.15	1	6.69	1.03		0.0712	0.8076	0.7065	0.8476	0.5762	0.9998	0.1047	0.9488	0.3357	0.9942	0.4517	0.9315	0.9067	1		3.6262	3.5738	3.6786	2.0619	3.6786	2.1142	0.5499	3.6785		100	100	100	100	83	85
	3304			5alpha-pregnan-3beta,20alpha-diol monosulfate (2)	LC/MS neg	37200								0.118742	0.04	0.56	2.33	0.17		0.0372	0.8076	0.4969	0.8374	0.0618	0.9998	0.0096	0.6867	0.8503	0.9984	0.3039	0.9315	0.1047	1		3.1522	5.3677	0.9366	2.7961	0.7304	0.3743	0.2245	0.5241		57	75	33	50	50	46
	3310			5alpha-pregnan-3beta,20alpha-diol disulfate	LC/MS neg	37198		HMDB0094650	118703093					0.0568767	0.02	0.09	3.92	1.12		0.0392	0.8076	0.6436	0.8374	0.6275	0.9998	0.0779	0.9488	0.2199	0.9942	0.446	0.9315	0.9884	1		4.1968	3.9504	4.4431	2.0237	2.4117	0.2387	0.097	0.3804		57	50	67	38	42	31
	3311			5alpha-pregnan-diol disulfate	LC/MS neg	46172		HMDB0240582 HMDB0240581	3082277;5127902					0.235396	0.14	0.3	3.26	1.53		0.318	0.8076	0.422	0.8374	0.7902	0.9998	0.3844	0.9767	0.5872	0.9942	0.3891	0.9315	0.7293	1		3.9338	3.1135	4.754	1.7741	3.0856	0.926	0.4346	1.4173		57	50	67	38	50	38
	3318			pregnanolone/allopregnanolone sulfate	LC/MS neg	48394	C05480	HMDB0240591 HMDB0062782	31402;129699967					0.222292	0.17	0.29	1.41	0.8		0.0441	0.8076	0.8895	0.8629	0.4764	0.9998	0.0625	0.9488	0.3045	0.9942	0.6408	0.9775	0.5874	1		2.0608	2.2933	1.8282	1.3368	1.182	0.4581	0.3803	0.5358		43	50	33	25	50	38
	3341		Corticosteroids	tetrahydrocortisol sulfate (1)	LC/MS neg	62793								1.55572	2.98	1.21	1.67	4.12		0.6012	0.8754	0.3505	0.8125	0.6406	0.9998	0.4979	0.9912	0.9671	1	0.6996	0.9935	0.374	1		0.2656	0.1038	0.4274	0.2065	0.4723	0.4132	0.3092	0.5172		29	0	67	13	42	31
	3342			tetrahydrocortisol sulfate (2)	LC/MS neg	62794								0.334062	0.31	0.34	2.28	2.07		0.2425	0.8076	0.3802	0.8298	0.822	0.9998	0.3364	0.9708	0.4831	0.9942	0.3739	0.9315	0.6738	1		1.5551	1.0129	2.0973	0.6647	1.4098	0.5195	0.3165	0.7224		57	50	67	50	67	62
	3343			tetrahydrocortisol disulfate	LC/MS neg	62795								0.690845	0.14	4.7	4.7	0.14		0.6976	0.8894	0.6976	0.8476	0.0426	0.9998	0.0931	0.9488	0.2063	0.9942	0.1633	0.9157	0.1178	1		0.8727	1.5338	0.2117	0.8727	0.6029	0.6029	0.2117	0.9941		43	50	33	25	50	38
	3365		Androgenic Steroids	11-ketoetiocholanolone sulfate	LC/MS neg	38167								0.777494	0.23	1.68	4.43	0.61		0.5311	0.8664	0.5497	0.8374	0.1514	0.9998	0.1595	0.9488	0.5366	0.9942	0.1061	0.8759	0.5767	1		0.5883	0.7328	0.4438	0.4506	0.595	0.4574	0.1684	0.7463		57	50	67	25	58	38
	3367			dehydroepiandrosterone sulfate (DHEA-S)	LC/MS neg	32425	C04555	HMDB0001032	12594					0.480857	0.01	1.17	136.95	0.69		0.2244	0.8076	0.4439	0.8374	0.4658	0.9998	0.186	0.9488	0.7114	0.9971	0.2333	0.9315	0.9811	1		2.7399	3.2382	2.2417	1.6287	2.4287	1.3175	0.0191	2.6158		71	50	100	63	58	54
	3369			16alpha-hydroxy DHEA 3-sulfate	LC/MS neg	38168		HMDB0062544	20848950					0.221311	0.27	0.2	1.45	1.98		0.0595	0.8076	0.6965	0.8476	0.8943	0.9998	0.1565	0.9488	0.1866	0.9942	0.6727	0.9808	0.8696	1		1.3176	0.8847	1.7505	0.5614	1.0478	0.2916	0.2381	0.3451		43	50	33	25	33	23
	3372			epiandrosterone sulfate	LC/MS neg	33973	C04555	HMDB0062657	9929317					0.736119	0.15	1.93	6.48	0.49		0.4156	0.8361	0.5037	0.8374	0.247	0.9998	0.1806	0.9488	0.7931	0.9984	0.1468	0.9157	0.7462	1		0.7204	0.9658	0.475	0.5538	0.6969	0.5303	0.1417	0.9188		57	50	67	25	58	38
	3380			androsterone sulfate	LC/MS neg	31591		HMDB0002759	159663					0.966772	0.39	2.08	2.76	0.52		0.7905	0.9063	0.5821	0.8374	0.4119	0.9998	0.4556	0.9912	0.682	0.9942	0.2729	0.9315	0.8604	1		0.6019	0.7924	0.4114	0.551	0.6328	0.5819	0.3096	0.8542		57	50	67	38	67	54
	3388			5alpha-androstan-3alpha,17alpha-diol monosulfate	LC/MS neg	37183		HMDB0000412						0.994784	0.55	1.28	3.62	1.55		0.7181	0.8894	0.1635	0.7336	0.4757	0.9998	0.4615	0.9912	0.7947	0.9984	0.0955	0.8655	0.6486	1		0.8436	0.6612	1.026	0.5121	1.1707	0.8392	0.3629	1.3154		57	50	67	38	75	62
	3389			5alpha-androstan-3alpha,17alpha-diol disulfate	LC/MS neg	37182								0.830389	0.31	0.94	14.54	4.86		0.7235	0.8894	0.0415	0.5456	0.636	0.9998	0.5707	0.9954	0.93	1	0.0443	0.6897	0.2862	1		0.5548	0.1894	0.9203	0.1243	0.8912	0.4607	0.0593	0.8621		43	25	67	25	67	54
	3390			androstenediol (3beta,17beta) monosulfate (1)	LC/MS neg	37211		HMDB0240429	13847309;129670631					0.187555	0.01	0.34	34.03	1.14		0.25	0.8076	0.6282	0.8374	0.3442	0.9998	0.1556	0.9488	0.8753	0.9984	0.2524	0.9315	0.7635	1		1.1298	1.0544	1.2052	0.5332	0.8085	0.2119	0.0121	0.4118		57	50	67	25	50	31
	3391			androstenediol (3beta,17beta) monosulfate (2)	LC/MS neg	37210		HMDB0186954 HMDB0240429						4.0716	1.15	4.87	15.48	3.65		0.9941	0.9214	0.166	0.7352	0.8588	0.9998	0.9067	1	0.8926	0.9991	0.3195	0.9315	0.3145	1		1.3688	0.5886	2.149	0.6324	6.3096	5.5732	0.6763	10.4702		86	75	100	75	58	54
	3393			androstenediol (3beta,17beta) disulfate (1)	LC/MS neg	37202	C04295	HMDB0240313	87120982					0.120545	0.04	0.15	9.38	2.81		0.1195	0.8076	0.3082	0.8082	0.6835	0.9998	0.176	0.9488	0.3834	0.9942	0.2527	0.9315	0.6906	1		3.4626	1.8184	5.1068	0.9494	2.9306	0.4174	0.0804	0.7544		57	50	67	38	50	38
	3394			androstenediol (3beta,17beta) disulfate (2)	LC/MS neg	37203		HMDB0240313	87120982					0.225926	0.15	0.28	2.7	1.41		0.1828	0.8076	0.6645	0.8449	0.5617	0.9998	0.1914	0.9488	0.568	0.9942	0.4152	0.9315	0.9248	1		1.566	1.3001	1.832	0.7458	1.1741	0.3538	0.1915	0.5161		57	50	67	38	50	38
	3397			androstenediol (3alpha, 17alpha) monosulfate (2)	LC/MS neg	37207								5.4688	1.34	7.97	9.82	1.65		0.6258	0.8754	0.4217	0.8374	0.8289	0.9998	0.8511	1	0.6085	0.9942	0.4109	0.9315	0.7054	1		0.7901	0.5966	0.9835	0.6978	4.4132	4.3209	0.799	7.8428		57	50	67	50	67	62
	3408			5alpha-androstan-3alpha,17beta-diol monosulfate (1)	LC/MS neg	37186			121596226;121596225					1.88558	0.64	2.34	9.95	2.71		0.8856	0.9084	0.1024	0.6985	0.7433	0.9998	0.8993	1	0.7314	0.9976	0.1143	0.8907	0.3865	1		0.4929	0.2654	0.7205	0.2176	1.2048	0.9294	0.1698	1.689		57	25	100	25	75	54
	3409			5alpha-androstan-3alpha,17beta-diol monosulfate (2)	LC/MS neg	37185			121596225					2.04717	0.88	3.11	3.87	1.09		0.3704	0.8298	0.1569	0.7336	0.2155	0.9998	0.8035	1	0.1266	0.9942	0.0393	0.68	0.9025	1		0.583	0.5567	0.6093	0.5234	1.2531	1.1935	0.4901	1.8968		43	50	33	25	67	54
	3410			5alpha-androstan-3alpha,17beta-diol disulfate	LC/MS neg	37184		HMDB0094682	56639109					0.68895	0.26	0.74	26.69	9.32		0.6825	0.8894	0.0601	0.6338	0.8107	0.9998	0.6562	1	0.9012	0.9991	0.0855	0.8515	0.2743	1		0.9484	0.1838	1.713	0.1155	1.4863	0.6534	0.0472	1.2596		43	25	67	38	58	54
	3414			5alpha-androstan-3beta,17beta-diol monosulfate (1)	LC/MS neg	37191								0.984269	0.39	1.15	10.38	3.49		0.5662	0.8754	0.0447	0.5692	0.6014	0.9998	0.4532	0.9912	0.9698	1	0.0435	0.6853	0.3109	1		1.4176	0.6314	2.2038	0.4383	2.3746	1.3953	0.2452	2.5453		86	75	100	38	83	54
	3415			5alpha-androstan-3beta,17beta-diol monosulfate (2)	LC/MS neg	37192								0.403824	0.11	0.78	5.3	0.76		0.2349	0.8076	0.6782	0.847	0.4964	0.9998	0.2033	0.9488	0.7	0.9942	0.3791	0.9315	0.8641	1		1.7312	1.9632	1.4992	1.0926	1.3378	0.6991	0.2219	1.1763		57	50	67	25	50	31
	3416			5alpha-androstan-3beta,17beta-diol disulfate	LC/MS neg	37190	C12525	HMDB00493	90186325					0.407165	0.29	0.46	3.26	2.04		0.3195	0.8076	0.2834	0.7906	0.8857	0.9998	0.4318	0.9885	0.5296	0.9942	0.3249	0.9315	0.5483	1		0.8849	0.5822	1.1876	0.3756	0.8696	0.3603	0.1691	0.5515		57	50	67	25	50	31
	3417			5alpha-androstan-3beta,17alpha-diol monosulfate (1)	LC/MS neg	37188								1.34535	0.59	1.49	12.96	5.15		0.7754	0.9043	0.0245	0.525	0.7956	0.9998	0.7087	1	0.9847	1	0.0412	0.68	0.1771	1		0.6188	0.2013	1.0362	0.1603	1.291	0.8325	0.1193	1.5458		43	25	67	25	67	54
	3418			5alpha-androstan-3beta,17alpha-diol monosulfate (2)	LC/MS neg	46180								0.396238	0.13	1.3	2.91	0.29		0.1208	0.8076	0.7935	0.861	0.0193	0.9998	0.0102	0.6867	0.4933	0.9942	0.0773	0.8348	0.0869	1		1.1748	1.8173	0.5322	1.0279	0.6124	0.4655	0.2384	0.6927		71	100	33	50	75	62
	3483		Primary Bile Acid Metabolism	cholate	LC/MS neg	22842	C00695	HMDB0000619	221493					1.53742	19.2	1.33	5.93	85.59		0.5122	0.8612	0.0402	0.5456	0.146	0.9998	0.1503	0.9488	0.5406	0.9942	0.5769	0.9599	0.0293	1		7.5114	0.1735	14.8492	1.7525	17.3071	11.5482	3.3314	19.765		57	25	100	63	100	100
	3485			taurocholate	LC/MS neg	18497	C05122	HMDB0000036	46783527;6675					0.626533	1.58	0.52	2.89	8.8		0.881	0.9084	0.1216	0.6985	0.3724	0.9998	0.606	0.9981	0.4469	0.9942	0.57	0.9591	0.1239	1		2.3812	0.4859	4.2766	0.6261	3.247	1.4919	0.7663	2.2174		29	0	67	38	58	62
	3487			chenodeoxycholic acid sulfate (1)	LC/MS neg	63607		HMDB0002522	21252308					0.134291	0.06	0.23	3.32	0.82		0.2308	0.8076	0.8528	0.8629	0.8923	0.9998	0.3559	0.9708	0.4311	0.9942	0.7954	0.9938	0.9745	1		20.2255	22.2472	18.2037	11.753	11.1886	2.7161	1.2587	4.1734		86	75	100	75	75	69
	3488			chenodeoxycholic acid sulfate (2)	LC/MS neg	63608								0.228253	0.13	0.38	1.73	0.61		0.8894	0.9084	0.9728	0.8754	0.8692	0.9998	0.986	1	0.8249	0.9984	0.9159	0.9953	0.8994	1		1.7612	2.1842	1.3382	1.2391	0.9241	0.402	0.2941	0.51		29	25	33	50	42	54
	3492			taurochenodeoxycholate	LC/MS neg	18494	C05465	HMDB0000951	387316					0.90077	1.73	0.64	1.16	3.15		0.8926	0.9084	0.595	0.8374	0.2276	0.9998	0.4537	0.9912	0.3254	0.9942	0.5726	0.9599	0.2697	1		0.5845	0.282	0.887	0.3843	0.7268	0.5265	0.4866	0.5665		43	25	67	50	50	54
	3499			glyco-beta-muricholate**	LC/MS neg	62066								0.141364	1.57	0.07	0.83	19.39		0.2854	0.8076	0.1907	0.7635	0.1256	0.9998	0.73	1	0.0647	0.9942	0.8425	0.9938	0.0759	1		6.039	0.5924	11.4857	0.7615	6.1312	0.8537	0.9306	0.7768		43	25	67	38	33	31
	3500			cholate sulfate	LC/MS neg	52973								0.398711	0.12	1.51	3.27	0.25		0.343	0.8101	0.9637	0.8698	0.2076	0.9998	0.1351	0.9488	0.8096	0.9984	0.2879	0.9315	0.432	1		1.5046	2.4008	0.6084	1.3408	0.7637	0.5999	0.2809	0.919		43	50	33	38	42	38
	3512		Secondary Bile Acid Metabolism	deoxycholic acid 3-sulfate	LC/MS neg	52969		HMDB0002504	22833601					0.101842	0	14.72	23.64	0.01		0.6013	0.8754	0.9026	0.8629	0.8221	0.9998	0.6079	0.9981	0.8271	0.9984	0.7791	0.9938	0.948	1		51.1035	101.528	0.6785	50.9754	5.3325	5.2045	0.4224	9.9866		43	25	67	38	58	54
	3513			deoxycholic acid 12-sulfate*	LC/MS neg	63688								0.108139	0.04	0.23	3.89	0.6		0.1056	0.8076	0.5855	0.8374	0.757	0.9998	0.1821	0.9488	0.3226	0.9942	0.4912	0.9385	0.8797	1		14.4481	18.0444	10.8517	9.3417	6.6688	1.5624	0.639	2.4858		86	75	100	63	83	69
	3516			3-dehydrodeoxycholate	LC/MS neg	63119		HMDB0062742	160738					0.730999	0.92	0.58	0.82	1.3		0.3465	0.8101	0.4846	0.8374	0.39	0.9998	0.9534	1	0.1955	0.9942	0.8936	0.9953	0.3241	1		1.4052	1.2235	1.5869	1.1771	1.2553	1.0272	1.1307	0.9237		100	100	100	100	100	100
	3521			taurodeoxycholic acid 3-sulfate	LC/MS neg	62889								1	1	1	1	1																	1	1	1	1	1	1	1	1		14	25	0	13	0	0
	3525			lithocholate	LC/MS neg	1483	C03990	HMDB0000761	9903					0.516052	0.7	0.34	0.53	1.08		0.1192	0.8076	0.7494	0.8527	0.4111	0.9998	0.589	0.9977	0.0883	0.9942	0.3586	0.9315	0.7455	1		2.2614	2.1759	2.3469	1.8502	1.5782	1.167	1.5245	0.8095		100	100	100	100	100	100
	3527			12-ketolithocholate	LC/MS neg	63118		HMDB0000328	3080612					0.576466	0.67	0.5	0.87	1.16		0.2765	0.8076	0.4881	0.8374	0.3839	0.9998	0.8756	1	0.1599	0.9942	0.8826	0.9953	0.3224	1		1.6818	1.5578	1.8058	1.2976	1.3537	0.9695	1.0373	0.9017		100	100	100	100	100	100
	3528			lithocholate sulfate (1)	LC/MS neg	62526			451489					0.0879942	0.04	0.11	7.81	2.85		0.025	0.7678	0.3858	0.8298	0.8677	0.9998	0.1331	0.9488	0.0722	0.9942	0.5674	0.9591	0.5094	1		6.4902	3.3672	9.6133	1.7484	5.3129	0.5711	0.1296	1.0125		71	75	67	63	58	54
	3529			lithocholic acid sulfate (2)	LC/MS neg	62527								0.172676	0.38	0.06	0.28	1.83		0.2898	0.8076	0.7072	0.8476	0.3798	0.9998	0.8969	1	0.1647	0.9942	0.314	0.9315	0.7447	1		5.7686	4.0813	7.456	2.821	3.9437	0.9961	1.5608	0.4315		86	75	100	75	83	77
	3530			glycolithocholate	LC/MS neg	31912	C15557	HMDB0000698	115245					0.319073	0.39	0.23	0.46	0.77		0.3132	0.8076	0.5324	0.8374	0.9622	0.9998	0.5047	0.9912	0.4388	0.9942	0.5866	0.9599	0.7123	1		1.9798	2.2324	1.7272	1.5502	1.0613	0.6317	0.8679	0.3954		71	75	67	63	42	38
	3531			glycolithocholate sulfate*	LC/MS neg	32620	C11301	HMDB0002639	72222					0.160969	1.25	0.1	1.34	17.18		0.3269	0.8076	0.083	0.6865	0.1965	0.9998	0.8201	1	0.1048	0.9942	0.6905	0.9883	0.0589	1		5.2128	0.5735	9.8521	0.646	5.4059	0.8391	0.7185	0.9597		86	75	100	63	75	62
	3532			taurolithocholate	LC/MS neg	31889	C02592	HMDB0000722	439763					0.187877	0.42	0.09	0.53	2.42		0.0683	0.8076	0.7153	0.8488	0.5555	0.9998	0.3664	0.9721	0.0808	0.9942	0.4427	0.9315	0.8851	1		1.2934	0.7562	1.8305	0.5367	0.9997	0.243	0.3171	0.169		43	50	33	50	17	23
	3533			taurolithocholate 3-sulfate	LC/MS neg	36850	C03642	HMDB0002580	440071					0.237492	0.7	0.1	0.45	3.25		0.2989	0.8076	0.9267	0.8658	0.2193	0.9998	0.8898	1	0.1057	0.9942	0.3522	0.9315	0.3956	1		2.9142	1.3709	4.4574	1.1619	2.4443	0.6921	0.9529	0.4312		57	50	67	50	33	31
	3540			isoursodeoxycholate	LC/MS neg	57577	C17662	HMDB0000686	127601					0.142235	3.35	0.04	0.33	30.3		0.9448	0.917	0.8473	0.8629	0.1555	0.9998	0.2993	0.9708	0.3159	0.9942	0.3105	0.9315	0.2992	1		21.9588	1.4032	42.5143	3.0505	22.0316	3.1233	4.6977	1.5489		100	100	100	100	100	100
	3541			isoursodeoxycholate sulfate (1)	LC/MS neg	63602								0.188069	0.27	0.18	10.22	14.87		0.1383	0.8076	0.1732	0.7407	0.5062	0.9998	0.5537	0.9954	0.122	0.9942	0.5551	0.9547	0.1991	1		4.04	0.5092	7.5707	0.3223	4.4775	0.7598	0.1354	1.3842		71	75	67	50	50	38
	3545			glycoursodeoxycholate	LC/MS neg	39379		HMDB0000708	12310288					0.155414	1.82	0.07	0.8	20.16		0.1117	0.8076	0.0406	0.5456	0.0188	0.9998	0.5312	0.9954	0.0064	0.9942	0.7585	0.9938	0.0072	1		5.0253	0.475	9.5755	0.6703	5.136	0.781	0.8656	0.6965		57	25	100	50	67	62
	3549			tauroursodeoxycholate	LC/MS neg	39378		HMDB0000874	9848818					0.0448783	2.53	0	0.09	60.56		0.4103	0.8361	0.8771	0.8629	0.063	0.9998	0.44	0.9908	0.0547	0.9942	0.1561	0.9157	0.1893	1		29.1299	0.9464	57.3133	1.6721	28.7651	1.3073	2.3979	0.2168		43	25	67	50	33	38
	3551			dehydrolithocholate	LC/MS neg	31891		HMDB00502	5283906					0.380376	0.57	0.26	0.74	1.64		0.1919	0.8076	0.4817	0.8374	0.3316	0.9998	0.8072	1	0.1042	0.9942	0.8231	0.9938	0.2896	1		3.1461	2.3878	3.9045	1.88	2.4629	1.1967	1.3721	1.0213		100	100	100	100	100	100
	3552			7,12-diketolithocholate	LC/MS neg	31906			3080560					0.747953	0.84	0.65	0.67	0.87		0.5065	0.86	0.6037	0.8374	0.6799	0.9998	0.8608	1	0.4346	0.9942	0.4537	0.9315	0.9454	1		1.4414	1.5406	1.3422	1.4143	1.1053	1.0781	1.288	0.8683		71	75	67	88	58	69
	3554			6-oxolithocholate	LC/MS neg	46336			164960					0.231357	0.22	0.24	1	0.91		0.1237	0.8076	0.4971	0.8374	0.4638	0.9998	0.5562	0.9954	0.1026	0.9942	0.9646	1	0.3714	1		3.8205	4.0043	3.6368	2.4442	2.2602	0.8839	0.8841	0.8836		86	75	100	75	92	85
	3555			7-ketolithocholate	LC/MS neg	43830		HMDB0000467	444262					0.531085	1.38	0.41	2.19	7.3		0.8603	0.9084	0.5746	0.8374	0.5308	0.9998	0.755	1	0.5586	0.9942	0.957	1	0.4512	1		1.2096	0.2915	2.1277	0.3472	1.5048	0.6424	0.4029	0.8819		29	25	33	38	33	38
	3556			hyocholate (gamma-muricholate)	LC/MS neg	34093	C17649	HMDB0000760	92805					1.28128	1.29	1.27	0.74	0.75		0.9831	0.9214	0.2878	0.7993	0.9099	0.9998	0.9265	1	0.9465	1	0.4376	0.9315	0.451	1		1.1437	1.3051	0.9823	1.4959	1.1132	1.4654	1.6868	1.244		100	100	100	100	83	85
	3563			3-dehydrocholate	LC/MS neg	43835		HMDB00502	159655					0.588318	0.53	0.66	0.98	0.79		0.0516	0.8076	0.7716	0.8572	0.8887	0.9998	0.1424	0.9488	0.1722	0.9942	0.9031	0.9953	0.7844	1		1.3525	1.5128	1.1922	1.1592	0.989	0.7957	0.8056	0.7859		100	100	100	88	92	85
	3564			12-dehydrocholate	LC/MS neg	44644		HMDB00400	6674					0.652916	0.82	0.63	5.55	7.23		0.6999	0.8894	0.3264	0.8125	0.8293	0.9998	0.9067	1	0.6617	0.9942	0.5303	0.9484	0.4447	1		5.0616	1.2301	8.893	1.1195	7.2469	3.3048	1.0089	5.6007		86	75	100	88	92	92
	3566			glycocholenate sulfate*	LC/MS neg	32599								0.128616	0.14	0.13	3.04	3.3		0.237	0.8076	0.1372	0.7149	0.7014	0.9998	0.5726	0.9954	0.2552	0.9942	0.3565	0.9315	0.2315	1		3.8961	1.8112	5.9809	1.0297	3.3674	0.5011	0.2483	0.7539		43	25	67	38	67	62
	3567			taurocholenate sulfate*	LC/MS neg	32807								0.117274	0.09	0.17	1.21	0.61		0.0995	0.8076	0.8485	0.8629	0.9169	0.9998	0.2207	0.9622	0.2486	0.9942	0.8113	0.9938	0.956	1		5.795	7.201	4.3891	3.9076	2.567	0.6796	0.6141	0.745		29	25	33	25	42	38
	3568			7-ketodeoxycholate	LC/MS neg	31904		HMDB0000391	188292					1.95168	5.65	1.78	6.92	21.94		0.6502	0.8813	0.2071	0.7692	0.3811	0.9998	0.3629	0.9721	0.7534	0.9984	0.742	0.9938	0.1778	1		5.5624	0.485	10.6397	1.6127	14.8057	10.856	2.7403	18.9716		57	25	100	50	92	85
	3570			3beta-hydroxy-5-cholenoate	LC/MS neg	43507		HMDB0000308	92997					0.773672	1.37	0.56	1.14	2.79		0.859	0.9084	0.4442	0.8374	0.1518	0.9998	0.3763	0.9767	0.237	0.9942	0.5684	0.9591	0.1646	1		1.5641	0.8252	2.303	0.9792	1.795	1.2101	1.1332	1.287		86	75	100	88	83	85
	3571			glycodeoxycholate 3-sulfate	LC/MS neg	52975			101602538					1.01567	1	1.03	1.03	1		0.5973	0.8754	0.5973	0.8374	0.5973	0.9998	1	1	0.4435	0.9942	0.3962	0.9315	1	1		0.9766	0.9766	0.9766	0.9766	0.9919	0.9919	0.9766	1.0073		0	0	0	0	25	23
	3574			ursodeoxycholate sulfate (1)	LC/MS neg	52970								0.0851355	0.06	0.09	11.57	7.44		0.2314	0.8076	0.2387	0.7692	0.3553	0.9998	0.8434	1	0.129	0.9942	0.8286	0.9938	0.1853	1		27.2131	6.4478	47.9784	3.4083	26.1217	2.3168	0.3687	4.2649		71	50	100	63	67	62
	3577			ursocholate	LC/MS neg	57573	C17644	HMDB0000917	122340					4.5546	7.76	2.99	0.79	2.04		0.7114	0.8894	0.6578	0.8444	0.4201	0.9998	0.4201	0.9834	0.7467	0.9984	0.3165	0.9315	0.8139	1		1.5896	1.0449	2.1343	4.5761	4.2534	7.24	8.1074	6.3726		100	100	100	100	100	100
	3578			isohyodeoxycholate	LC/MS neg	57774		HMDB0000664	5283822					0.520053	0.57	0.46	0.69	0.86		0.1643	0.8076	0.5657	0.8374	0.9098	0.9998	0.37	0.9721	0.2685	0.9942	0.5784	0.9599	0.7681	1		2.0371	2.1847	1.8895	1.7187	1.3778	1.0594	1.2526	0.8662		100	100	100	100	92	92
	4150	Nucleotide	Purine Metabolism, (Hypo)Xanthine/Inosine containing	inosine	LC/MS neg	1123	C00294	HMDB0000195	6021					0.593497	0.39	0.8	2.09	1.02		0.1753	0.8076	0.3274	0.8125	0.8399	0.9998	0.281	0.9708	0.3897	0.9942	0.3402	0.9315	0.6156	1		1.8268	1.8112	1.8424	1.2564	1.6546	1.0842	0.7016	1.4667		100	100	100	100	100	100
	4151			hypoxanthine	LC/MS neg	3127	C00262	HMDB0000157	790;135398638					0.812673	0.98	0.72	1.3	1.77		0.8488	0.9084	0.1591	0.7336	0.3796	0.9998	0.4618	0.9912	0.612	0.9942	0.6493	0.9784	0.1494	1		1.1568	0.8353	1.4783	0.827	1.2699	0.9401	0.8187	1.0616		100	100	100	100	100	100
	4152			xanthine	LC/MS pos early	3147	C00385	HMDB0000292	1188					0.886945	1.06	0.77	1.01	1.39		0.5893	0.8754	0.3958	0.8317	0.421	0.9998	0.8525	1	0.3305	0.9942	0.9704	1	0.2959	1		1.1888	0.993	1.3847	1.0207	1.2226	1.0544	1.0483	1.0604		100	100	100	100	100	100
	4154			xanthosine	LC/MS neg	15136	C01762	HMDB0000299	64959					0.321135	0.31	0.33	1.66	1.52		0.0275	0.7678	0.4824	0.8374	0.8589	0.9998	0.1426	0.9488	0.0758	0.9942	0.669	0.9808	0.575	1		2.4675	1.9554	2.9796	1.2759	1.984	0.7924	0.5964	0.9884		100	100	100	100	100	100
	4158			2'-deoxyinosine	LC/MS neg	15076	C05512	HMDB0000071	135398593					0.795692	0.45	1.09	2.88	1.18		0.7146	0.8894	0.2278	0.7692	0.6012	0.9998	0.5425	0.9954	0.9081	0.9999	0.1677	0.9157	0.6527	1		1.4762	1.3574	1.595	0.9816	1.6692	1.1746	0.6058	1.7434		100	100	100	100	100	100
	4162			urate	LC/MS neg	1604	C00366	HMDB0000289	1175					0.823032	0.89	0.76	0.85	0.99		0.704	0.8894	0.3397	0.8125	0.5945	0.9998	0.9157	1	0.5076	0.9942	0.2347	0.9315	0.7826	1		2.223	2.2301	2.2158	2.103	1.9495	1.8296	1.9759	1.6833		100	100	100	100	100	100
	4164			allantoin	LC/MS polar	1107	C02350 C02348 C01551	HMDB0000462	204;439714;439713					1.57342	1.6	1.52	0.53	0.55		0.3016	0.8076	0.1511	0.7336	0.3652	0.9998	0.1884	0.9488	0.9225	1	0.0661	0.8207	0.719	1		0.7471	0.9611	0.5331	1.2504	0.6721	1.1755	1.5398	0.8112		57	50	67	75	67	77
	4167			1-methylhypoxanthine	LC/MS pos early	57771		HMDB0013141	70765					4.36828	3.36	6.13	1.05	0.57		0.2513	0.8076	0.627	0.8374	0.9661	0.9998	0.4091	0.9826	0.4154	0.9942	0.669	0.9808	0.7772	1		0.309	0.3925	0.2254	0.8549	0.8038	1.3498	1.3173	1.3822		100	100	100	88	75	69
	4170		Purine Metabolism, Adenine containing	adenosine 5'-monophosphate (AMP)	LC/MS pos early	32342	C00020	HMDB0000045	6083					0.522062	0.76	0.42	1.37	2.47		0.1109	0.8076	0.1289	0.7111	0.3044	0.9998	0.6726	1	0.0624	0.9942	0.6683	0.9808	0.1097	1		2.0624	1.1883	2.9364	1.0487	2.0904	1.0767	0.909	1.2444		86	75	100	88	100	100
	4177			adenosine	LC/MS pos early	555	C00212	HMDB0000050	60961					0.484794	0.49	0.48	0.97	1		0.0627	0.8076	0.8913	0.8629	0.9529	0.9998	0.201	0.9488	0.1526	0.9942	0.8743	0.9948	0.9606	1		2.0124	2.0157	2.0091	1.5019	1.4861	0.9756	0.988	0.9631		100	100	100	100	100	100
	4178			adenine	LC/MS pos early	554	C00147	HMDB0000034	190					0.526411	0.48	0.65	0.54	0.4		0.5967	0.8754	0.3324	0.8125	0.5716	0.9998	0.9797	1	0.4274	0.9942	0.2204	0.9315	0.7917	1		2.3305	3.3353	1.3257	2.4626	1.0947	1.2268	1.59	0.8637		100	100	100	100	100	100
	4179			1-methyladenine	LC/MS pos early	1527	C02216	HMDB0011599	135398646					0.862823	1.39	0.57	0.75	1.81		0.7311	0.8894	0.6331	0.8374	0.1186	0.9998	0.3852	0.9767	0.1645	0.9942	0.3612	0.9315	0.1931	1		1.2072	0.8586	1.5557	1.0242	1.2246	1.0416	1.1897	0.8935		86	75	100	88	92	92
	4184			N1-methyladenosine	LC/MS pos early	15650	C02494	HMDB0003331	27476					0.862596	1.45	0.59	0.88	2.16		0.5827	0.8754	0.3346	0.8125	0.053	0.9998	0.309	0.9708	0.0713	0.9942	0.3891	0.9315	0.0673	1		1.04	0.6589	1.4211	0.8057	1.1314	0.8971	0.9525	0.8416		71	50	100	75	67	69
	4185			N6-methyladenosine	LC/MS pos early	37114		HMDB0004044	102175					0.961535	1.25	0.77	0.91	1.47		0.6666	0.8862	0.6965	0.8476	0.3128	0.9998	0.6839	1	0.2963	0.9942	0.6091	0.9634	0.3733	1		1.0321	0.8355	1.2286	0.9385	1.086	0.9924	1.0414	0.9434		100	100	100	100	92	92
	4195			N6-carbamoylthreonyladenosine	LC/MS neg	35157		HMDB0041623	161466					1.08663	1.24	0.98	1.12	1.42		0.8525	0.9084	0.4656	0.8374	0.5327	0.9998	0.5779	0.9954	0.7479	0.9984	0.9304	0.9953	0.3912	1		0.8784	0.7256	1.0313	0.8137	1.0192	0.9545	0.9019	1.0071		71	75	67	75	58	62
	4198			2'-deoxyadenosine 5'-monophosphate	LC/MS pos early	46333	C00360	HMDB0000905	12599					1.09655	0.31	1.82	6.49	1.1		0.3952	0.8361	0.3807	0.8298	0.3535	0.9998	0.2268	0.9643	0.9532	1	0.1527	0.9157	0.973	1		1.0129	0.9656	1.0602	0.6311	1.4925	1.1107	0.2965	1.9248		71	75	67	63	83	77
	4200			2'-deoxyadenosine	LC/MS pos early	1553	C00559	HMDB0000101	13730					0.834487	0.94	0.74	0.93	1.17		0.6222	0.8754	0.6753	0.847	0.9127	0.9998	0.7916	1	0.6606	0.9942	0.802	0.9938	0.7366	1		1.1842	1.0917	1.2768	1.059	1.1135	0.9882	1.0263	0.9502		100	100	100	100	100	100
	4213		Purine Metabolism, Guanine containing	guanosine	LC/MS neg	1573	C00387	HMDB0000133	6802					0.662648	0.47	0.85	1.87	1.02		0.0833	0.8076	0.343	0.8125	0.4308	0.9998	0.0868	0.9488	0.4599	0.9942	0.1681	0.9157	0.9157	1		1.3852	1.3691	1.4012	1.0043	1.2988	0.9179	0.6395	1.1964		100	100	100	100	100	100
	4214			guanine	LC/MS pos early	32352	C00242	HMDB0000132	135398634					1.00175	0.88	1.12	1.28	1		0.8151	0.9084	0.8973	0.8629	0.9989	0.9998	0.8731	1	0.8638	0.9984	0.9178	0.9953	0.9338	1		1.0261	1.0238	1.0284	0.9625	1.0916	1.0279	0.9012	1.1547		100	100	100	100	100	100
	4217			7-methylguanine	LC/MS pos early	35114	C02242	HMDB0000897	135398679					1.28706	2.8	0.73	0.71	2.72		0.4538	0.8445	0.6613	0.8444	0.2686	0.9998	0.207	0.95	0.7862	0.9984	0.5794	0.9599	0.326	1		1.6617	0.8929	2.4304	1.6978	2.1026	2.1387	2.5026	1.7748		100	100	100	100	100	100
	4227			8-hydroxyguanine	LC/MS pos early	38672	C20155	HMDB0002032	135420630					1.10497	0.66	1.48	2.65	1.19		0.9569	0.9211	0.1583	0.7336	0.8571	0.9998	0.8722	1	0.9268	1	0.3099	0.9315	0.3058	1		1.4985	1.3687	1.6283	1.1382	2.0161	1.6558	0.9077	2.404		100	100	100	100	92	92
	4229			2'-deoxyguanosine 5'-monophosphate (dGMP)	LC/MS pos early	35662	C00362	HMDB0001044	135398597					0.458908	0.68	0.42	3.62	5.86		0.2304	0.8076	0.0633	0.6384	0.4647	0.9998	0.7367	1	0.1651	0.9942	0.3286	0.9315	0.1	1		2.857	0.8329	4.8812	0.7002	3.4679	1.3111	0.5675	2.0546		71	50	100	38	67	46
	4231			2'-deoxyguanosine	LC/MS neg	1411	C00330	HMDB0000085	135398592					1.20268	0.74	1.69	2.19	0.96		0.995	0.9214	0.3872	0.8303	0.2797	0.9998	0.4557	0.9912	0.4241	0.9942	0.124	0.9024	0.8855	1		0.97	0.9892	0.9507	0.8597	1.2768	1.1666	0.7303	1.6029		100	100	100	100	100	100
	4236		Pyrimidine Metabolism, Orotate containing	N-carbamoylaspartate	LC/MS polar	1594	C00438	HMDB0000828	93072					0.372844	0.66	0.22	0.64	1.89		0.1765	0.8076	0.8367	0.8624	0.7814	0.9998	0.4481	0.9912	0.2342	0.9942	0.9538	1	0.7585	1		3.653	2.5282	4.7778	2.0924	2.9227	1.362	1.6566	1.0675		100	100	100	100	100	100
	4237			dihydroorotate	LC/MS polar	601	C00337	HMDB03349	648					0.539615	0.62	0.4	0.39	0.61		0.3038	0.8076	0.9155	0.8629	0.4005	0.9998	0.893	1	0.1794	0.9942	0.5496	0.954	0.5452	1		3.2349	4.0204	2.4494	3.263	1.7175	1.7456	2.5057	0.9856		86	75	100	88	100	100
	4238			orotate	LC/MS polar	1505	C00295	HMDB0000226	967					0.808066	1.01	0.68	1.08	1.6		0.8577	0.9084	0.322	0.8125	0.2798	0.9998	0.529	0.9954	0.3571	0.9942	0.9386	0.9974	0.1921	1		1.1332	0.871	1.3954	0.8749	1.1739	0.9157	0.8789	0.9525		100	100	100	100	100	100
	4245		Pyrimidine Metabolism, Uracil containing	uridine 5'-monophosphate (UMP)	LC/MS pos early	2856	C00105	HMDB0000288	6030					0.201906	0.2	0.2	2.39	2.36		0.0039	0.7598	0.224	0.7692	0.5653	0.9998	0.0743	0.9488	0.0109	0.9942	0.5911	0.9599	0.2559	1		3.2426	1.9291	4.5562	1.1577	2.7396	0.6547	0.3864	0.923		100	100	100	63	58	38
	4249			uridine-2',3'-cyclic monophosphate	LC/MS neg	37137	C02355	HMDB0011640	439715					1.18462	1.56	1.02	1.48	2.26		0.7307	0.8894	0.2812	0.7906	0.2342	0.9998	0.5512	0.9954	0.2645	0.9942	0.9234	0.9953	0.1541	1		1.1169	0.6852	1.5486	0.8754	1.5646	1.3231	1.0656	1.5806		71	50	100	75	75	77
	4250			uridine	LC/MS neg	606	C00299	HMDB0000296	6029					0.526763	0.48	0.58	1.18	0.98		0.0171	0.7678	0.803	0.8616	0.7038	0.9998	0.0524	0.9488	0.1168	0.9942	0.6115	0.9639	0.9334	1		1.6721	1.6907	1.6535	1.2499	1.3031	0.8808	0.809	0.9527		100	100	100	100	100	100
	4251			uracil	LC/MS neg	605	C00106	HMDB0000300	1174					0.787659	0.86	0.73	1.18	1.39		0.4455	0.839	0.2938	0.8055	0.565	0.9998	0.8953	1	0.333	0.9942	0.6926	0.9892	0.3029	1		1.1863	0.992	1.3806	0.9246	1.1961	0.9344	0.8572	1.0116		100	100	100	100	100	100
	4252			pseudouridine	LC/MS pos early	33442	C02067	HMDB0000767	15047					0.651214	0.7	0.61	1.1	1.25		0.3384	0.8101	0.4276	0.8374	0.4237	0.9998	0.9107	1	0.2062	0.9942	0.9956	1	0.3137	1		1.8487	1.6469	2.0505	1.3975	1.6551	1.2039	1.1482	1.2597		100	100	100	100	100	100
	4253			5,6-dihydrouridine	LC/MS neg	61833		HMDB0000497	94312					0.731329	1.2	0.5	0.86	2.04		0.1863	0.8076	0.1093	0.6985	0.2074	0.9998	0.9638	1	0.0671	0.9942	0.7614	0.9938	0.0736	1		1.4903	0.9791	2.0016	1.0757	1.5045	1.0899	1.1724	1.0074		100	100	100	100	100	100
	4254			2'-O-methyluridine	LC/MS neg	57655		HMDB0240328	102212					0.643135	0.93	0.49	1.02	1.94		0.274	0.8076	0.1605	0.7336	0.1364	0.9998	0.7687	1	0.0666	0.9942	0.9388	0.9974	0.071	1		1.1828	0.8057	1.56	0.7785	1.165	0.7607	0.7513	0.77		71	50	100	63	92	85
	4255			5-methyluridine (ribothymidine)	LC/MS neg	35136		HMDB0000884	445408					0.488085	0.4	0.59	1.29	0.88		0.108	0.8076	0.7751	0.8572	0.8683	0.9998	0.2169	0.9622	0.2801	0.9942	0.7153	0.9938	0.9391	1		1.796	1.9091	1.6829	1.3367	1.3358	0.8766	0.7644	0.9887		100	100	100	100	100	100
	4266			2'-deoxyuridine	LC/MS neg	52602	C00526	HMDB0000012	13712					0.926832	0.85	0.99	1.56	1.34		0.7057	0.8894	0.1467	0.7278	0.8843	0.9998	0.7193	1	0.8652	0.9984	0.1949	0.9315	0.3937	1		0.9813	0.8394	1.1232	0.7744	1.1165	0.9095	0.7093	1.1097		100	100	100	100	100	100
	4267			4-ureidobutyrate	LC/MS polar	22118			1571307					1.16998	0.79	1.97	1.2	0.48		0.8229	0.9084	0.1956	0.7637	0.3386	0.9998	0.6091	0.9981	0.3894	0.9942	0.7722	0.9938	0.1565	1		1.0325	1.3948	0.6702	1.2456	0.9948	1.208	1.0965	1.3195		100	100	100	100	92	92
	4269			3-ureidopropionate	LC/MS pos early	3155	C02642	HMDB0000026	111					1.61269	0.83	2.07	4.27	1.7		0.7224	0.8894	0.1163	0.6985	0.6386	0.9998	0.5717	0.9954	0.9331	1	0.1029	0.8742	0.463	1		1.1727	0.8681	1.4773	0.7933	2.2707	1.8912	0.7184	3.064		100	100	100	100	100	100
	4270			beta-alanine	LC/MS pos early	55	C00099	HMDB0000056	239					1.50329	1.52	1.48	0.89	0.91		0.1817	0.8076	0.5691	0.8374	0.7091	0.9998	0.2399	0.9708	0.4695	0.9942	0.4483	0.9315	0.8995	1		0.9573	1.001	0.9135	1.2627	1.1337	1.4391	1.5244	1.3539		100	100	100	100	100	100
	4272			N-acetyl-beta-alanine	LC/MS polar	37432	C01073	HMDB0061880	76406					0.890199	0.8	0.96	1.52	1.26		0.4729	0.8485	0.2818	0.7906	0.9173	0.9998	0.5715	0.9954	0.6525	0.9942	0.3388	0.9315	0.5303	1		0.7632	0.674	0.8524	0.6063	0.8363	0.6794	0.5386	0.8202		57	50	67	38	50	38
	4281		Pyrimidine Metabolism, Cytidine containing	cytidine 2',3'-cyclic monophosphate	LC/MS pos early	37465	C02354	HMDB0011691	23421172					0.887262	0.6	1.42	1.28	0.54		0.6777	0.8894	0.8806	0.8629	0.9998	0.9998	0.7748	1	0.7618	0.9984	0.9035	0.9953	0.9237	1		1.1744	1.5286	0.8202	1.2221	0.9943	1.042	0.9156	1.1684		43	25	67	25	50	38
	4282			cytidine	LC/MS pos early	514	C00475	HMDB0000089	6175					1.62009	1.23	1.97	1.76	1.1		0.4252	0.8361	0.5374	0.8374	0.6119	0.9998	0.8388	1	0.3447	0.9942	0.3672	0.9315	0.9437	1		0.9776	0.9313	1.0238	1.04	1.5213	1.5838	1.1488	2.0188		100	100	100	100	100	100
	4283			cytosine	LC/MS pos early	573	C00380	HMDB0000630	597					1.10376	2.18	0.81	1.39	3.73		0.7245	0.8894	0.0326	0.5362	0.2841	0.9998	0.3284	0.9708	0.5923	0.9942	0.3345	0.9315	0.0434	1		1.0669	0.4515	1.6823	0.7186	1.5259	1.1776	0.9856	1.3695		100	100	100	100	100	100
	4291			2'-deoxycytidine 5'-monophosphate	LC/MS pos early	533	C00239	HMDB0001202	13945					0.393979	0.28	0.43	4.27	2.8		0.0858	0.8076	0.1473	0.7278	0.7131	0.9998	0.3318	0.9708	0.1276	0.9942	0.3668	0.9315	0.245	1		2.7037	1.4241	3.9833	0.9142	2.8547	1.0652	0.4042	1.7262		86	75	100	75	92	85
	4293			2'-deoxycytidine	LC/MS pos early	15949	C00881	HMDB0000014	13711					2.00427	2.78	1.75	1.92	3.05		0.1502	0.8076	0.1252	0.6985	0.5652	0.9998	0.1685	0.9488	0.5102	0.9942	0.4169	0.9315	0.1797	1		0.8189	0.4042	1.2335	0.7638	1.6963	1.6413	1.1235	2.1591		100	100	100	100	100	100
	4295			2'-O-methylcytidine	LC/MS pos early	57554			150971					0.721582	0.58	0.89	1.31	0.85		0.753	0.8961	0.3454	0.8125	0.9353	0.9998	0.8723	1	0.7729	0.9984	0.4822	0.9385	0.5118	1		1.214	1.3128	1.1151	1.0356	1.0544	0.876	0.7585	0.9936		86	75	100	75	100	92
	4301		Pyrimidine Metabolism, Thymine containing	thymidine 5'-monophosphate	LC/MS neg	12023	C00364	HMDB0001227	9700					0.406489	0.53	0.38	3.06	4.27		0.151	0.8076	0.1452	0.7278	0.5118	0.9998	0.5731	0.9954	0.1318	0.9942	0.4966	0.9386	0.1802	1		3.4643	1.3147	5.6139	1.0041	3.8684	1.4082	0.6935	2.1229		86	75	100	75	92	85
	4305			thymidine	LC/MS neg	2183	C00214	HMDB0000273	5789					0.986153	0.96	1	1.55	1.49		0.9147	0.9084	0.113	0.6985	0.9935	0.9998	0.9368	1	0.9425	1	0.196	0.9315	0.2995	1		0.9316	0.7489	1.1143	0.7349	1.1154	0.9187	0.7209	1.1165		100	100	100	100	100	100
	4308			thymine	LC/MS neg	604	C00178	HMDB0000262	1135					0.971344	0.88	1.06	1.24	1.02		0.9659	0.9214	0.4287	0.8374	0.6961	0.9998	0.7657	1	0.7995	0.9984	0.742	0.9938	0.4527	1		1.3784	1.3629	1.3939	1.2804	1.437	1.3389	1.1979	1.48		100	100	100	100	100	100
	4314			3-aminoisobutyrate	LC/MS pos early	1566	C05145	HMDB0002166	64956					2.29098	2.75	1.82	0.65	0.97		0.7183	0.8894	0.8205	0.8616	0.933	0.9998	0.7598	1	0.8399	0.9984	0.8016	0.9938	0.9275	1		0.6966	0.7059	0.6872	1.3226	0.9699	1.5959	1.9392	1.2526		71	75	67	63	58	54
	4315		Purine and Pyrimidine Metabolism	methylphosphate	LC/MS pos early	37070		HMDB61711	13130					1.33092	1.14	1.41	3.2	2.59		0.227	0.8076	0.0441	0.5692	0.9653	0.9998	0.417	0.9826	0.3572	0.9942	0.0903	0.8655	0.192	1		1.0353	0.5766	1.494	0.616	1.7972	1.3779	0.6555	2.1003		100	100	100	100	100	100
	4316		Dinucleotide	(3'-5')-adenylylcytidine	LC/MS neg	52753			10875494					0.459131	0.39	0.5	1.95	1.52		0.1717	0.8076	0.8579	0.8629	0.9161	0.9998	0.3063	0.9708	0.349	0.9942	0.8182	0.9938	0.9626	1		2.5912	2.0529	3.1296	1.4299	2.351	1.1897	0.807	1.5725		100	100	100	75	75	62
	4317			(3'-5')-adenylylguanosine*	LC/MS neg	62760			135508729					0.420236	0.36	0.46	1.83	1.43		0.3817	0.8361	0.7123	0.8486	0.8711	0.9998	0.4751	0.9912	0.5997	0.9942	0.6681	0.9808	0.8952	1		2.54	2.0884	2.9916	1.4214	2.186	1.0674	0.7543	1.3805		100	100	100	75	83	69
	4318			(3'-5')-adenylyluridine	LC/MS neg	52740			145459093					0.435106	0.41	0.45	1.84	1.67		0.2426	0.8076	0.8489	0.8629	0.7132	0.9998	0.2915	0.9708	0.5494	0.9942	0.6523	0.9803	0.91	1		2.7044	2.0244	3.3843	1.4268	2.4542	1.1767	0.8292	1.5241		100	100	100	88	92	85
	4319			(3'-5')-adenylyladenosine*	LC/MS neg	62396			94231					0.425298	0.49	0.39	1.47	1.87		0.1641	0.8076	0.7058	0.8476	0.9652	0.9998	0.3457	0.9708	0.2896	0.9942	0.7869	0.9938	0.7886	1		2.7275	1.9019	3.5532	1.4215	2.466	1.16	0.9411	1.3789		100	100	100	88	92	85
	4321			(3'-5')-cytidylylcytidine*	LC/MS neg	62397			94237					0.653682	1.03	0.44	0.76	1.78		0.5768	0.8754	0.7815	0.8572	0.6609	0.9998	0.9339	1	0.4694	0.9942	0.8956	0.9953	0.649	1		1.1937	0.8589	1.5284	0.8724	1.1016	0.7803	0.8859	0.6748		57	50	67	38	58	46
	4322			(3'-5')-cytidylylguanosine	LC/MS neg	52745			65101					0.63116	1.12	0.36	0.59	1.81		0.526	0.8664	0.9493	0.8674	0.4787	0.9998	0.9584	1	0.3316	0.9942	0.6005	0.9613	0.6221	1		1.7978	1.2797	2.3159	1.3548	1.5778	1.1347	1.4299	0.8396		71	75	67	63	58	54
	4323			(3'-5')-cytidylyluridine*	LC/MS neg	62399			145459097					0.717257	1.21	0.49	0.91	2.21		0.7471	0.8951	0.6048	0.8374	0.9688	0.9998	0.8454	1	0.792	0.9984	0.6983	0.9935	0.7227	1		1.327	0.8263	1.8277	0.9127	1.3661	0.9518	0.9991	0.9045		86	100	67	88	75	77
	4324			(3'-5')-guanylyladenosine*	LC/MS neg	62761								0.750461	0.55	0.96	1.69	0.96		0.787	0.9063	0.8643	0.8629	0.9831	0.9998	0.864	1	0.8318	0.9984	0.9036	0.9953	0.9027	1		1.1922	1.2154	1.169	0.9404	1.1465	0.8947	0.6654	1.1241		43	25	67	38	50	46
	4325			(3'-5')-guanylylcytidine	LC/MS neg	52746			145459099					0.661688	0.5	0.78	2.25	1.44		0.5858	0.8754	0.5438	0.8374	0.9928	0.9998	0.7028	1	0.6954	0.9942	0.6177	0.9681	0.7025	1		1.1516	0.9451	1.3581	0.707	1.2066	0.762	0.4689	1.0551		71	75	67	50	58	46
	4326			(3'-5')-guanylyluridine	LC/MS neg	52743			145459101					0.666477	0.41	0.89	2.51	1.15		0.6502	0.8813	0.646	0.8374	0.8751	0.9998	0.6748	1	0.8284	0.9984	0.6185	0.9682	0.8469	1		1.2272	1.14	1.3144	0.8031	1.242	0.8179	0.4662	1.1696		71	75	67	50	50	38
	4327			(3'-5')-uridylylcytidine*	LC/MS neg	62398			145459103					0.578059	0.82	0.4	0.67	1.36		0.3238	0.8076	0.8583	0.8629	0.7444	0.9998	0.6435	1	0.3398	0.9942	0.9048	0.9953	0.7483	1		1.3336	1.1278	1.5393	1.0242	1.0802	0.7709	0.9207	0.6211		57	50	67	50	58	54
	4328			(3'-5')-uridylylguanosine	LC/MS neg	52742			107394					0.582327	0.98	0.36	0.64	1.76		0.531	0.8664	0.9133	0.8629	0.6054	0.9998	0.9388	1	0.4074	0.9942	0.7407	0.9938	0.6904	1		2.1445	1.5561	2.7329	1.5372	1.8561	1.2488	1.5184	0.9793		71	75	67	75	75	77
	4329			(3'-5')-uridylyluridine	LC/MS neg	52741			145459105					0.653904	1.03	0.46	0.88	1.96		0.6839	0.8894	0.5415	0.8374	0.8875	0.9998	0.8547	1	0.6894	0.9942	0.703	0.9938	0.6319	1		1.5828	1.0681	2.0976	1.0843	1.5336	1.035	1.1005	0.9695		71	75	67	75	83	85
	4331	Cofactors and Vitamins	Nicotinate and Nicotinamide Metabolism	quinolinate	LC/MS polar	1899	C03722	HMDB0000232	1066					1.59134	1.66	1.52	0.89	0.97		0.5239	0.866	0.7202	0.8513	0.7045	0.9998	0.486	0.9912	0.849	0.9984	0.5524	0.954	0.9892	1		0.8802	0.893	0.8674	1.1866	1.0942	1.4007	1.4803	1.3211		100	100	100	100	100	100
	4332			nicotinate	LC/MS pos early	1504	C00253	HMDB0001488	938					1.16051	1.09	1.21	1.52	1.37		0.9186	0.9084	0.253	0.7692	0.8696	0.9998	0.966	1	0.8461	0.9984	0.2902	0.9315	0.526	1		1.0853	0.9153	1.2552	0.958	1.3867	1.2595	1.0008	1.5182		100	100	100	100	100	100
	4333			nicotinate ribonucleoside	LC/MS pos early	33471	C05841	HMDB0006809	161233					3.82467	1.58	5.56	4.54	1.29		0.2283	0.8076	0.3686	0.8207	0.7447	0.9998	0.5356	0.9954	0.2652	0.9942	0.3247	0.9315	0.7105	1		0.7506	0.655	0.8462	0.8456	2.7757	2.8708	1.0362	4.7053		86	75	100	88	100	100
	4334			nicotinic acid mononucleotide (NaMN)	LC/MS pos early	32461	C01185	HMDB0001132	5288991					1.32658	0.53	2.75	2.88	0.56		0.9979	0.9217	0.9053	0.8629	0.3124	0.9998	0.4849	0.9912	0.4571	0.9942	0.3606	0.9315	0.5656	1		0.5331	0.6847	0.3814	0.5247	0.7156	0.7072	0.3647	1.0497		29	25	33	13	33	23
	4335			nicotinamide	LC/MS pos early	594	C00153	HMDB0001406	936					0.989167	1.22	0.82	0.95	1.4		0.9326	0.9105	0.4235	0.8374	0.1883	0.9998	0.3306	0.9708	0.3616	0.9942	0.6608	0.9808	0.1815	1		0.96	0.7991	1.1209	0.8873	1.0222	0.9496	0.9756	0.9235		100	100	100	100	100	100
	4338			nicotinamide riboside	LC/MS pos early	33013	C03150	HMDB0000855	439924					1.21205	1.45	1.03	0.95	1.33		0.8654	0.9084	0.9651	0.8704	0.6054	0.9998	0.6373	1	0.7992	0.9984	0.7015	0.9935	0.7209	1		1.0257	0.88	1.1714	1.0775	1.1914	1.2432	1.275	1.2114		100	100	100	100	100	100
	4339			nicotinamide adenine dinucleotide (NAD+)	LC/MS neg	5278	C00003		5892					0.873467	0.99	0.78	1.02	1.3		0.2741	0.8076	0.2404	0.7692	0.2932	0.9998	0.9753	1	0.1253	0.9942	0.916	0.9953	0.1617	1		1.0108	0.8779	1.1438	0.875	1.0187	0.8829	0.872	0.8937		71	50	100	38	50	31
	4347			1-methylnicotinamide	LC/MS pos early	27665	C02918	HMDB0000699	457					0.723478	0.31	1.07	4.12	1.2		0.4049	0.8361	0.2462	0.7692	0.2949	0.9998	0.2015	0.9488	0.8705	0.9984	0.083	0.8515	0.9397	1		1.1019	1.0029	1.2008	0.6571	1.242	0.7972	0.3112	1.2832		71	75	67	50	67	54
	4351			6-hydroxynicotinate	LC/MS polar	27680	C01020	HMDB0002658	72924					2.2626	1.36	3.71	1.71	0.63		0.1959	0.8076	0.6692	0.8462	0.4773	0.9998	0.6749	1	0.1495	0.9942	0.8161	0.9938	0.47	1		0.9364	1.1514	0.7213	1.3567	1.6983	2.1187	1.5621	2.6754		100	100	100	100	100	100
	4353			trigonelline (N'-methylnicotinate)	LC/MS pos early	32401	C01004	HMDB0000875	5570					0.448692	0.22	10.98	1.09	0.02		0.8712	0.9084	0.2588	0.7765	0.4117	0.9998	0.6475	1	0.4733	0.9942	0.7942	0.9938	0.2184	1		15.8746	31.0737	0.6756	18.949	4.0485	7.1228	6.8242	7.4213		100	100	100	100	100	100
	4363		Riboflavin Metabolism	riboflavin (vitamin B2)	LC/MS pos early	1827	C00255	HMDB0000244	493570					3.30055	6.24	0.93	0.18	1.24		0.2566	0.8076	0.4363	0.8374	0.2216	0.9998	0.1119	0.9488	0.9455	1	0.1136	0.8907	0.7672	1		1.0667	0.9533	1.1801	3.4514	1.136	3.5207	5.9495	1.0919		100	100	100	100	100	100
	4364			flavin adenine dinucleotide (FAD)	LC/MS neg	2134	C00016	HMDB0001248	643975					1.00168	1.02	0.99	1.53	1.58		0.9451	0.917	0.0857	0.6985	0.5818	0.9998	0.6698	1	0.7244	0.9976	0.3199	0.9315	0.1473	1		0.9533	0.7401	1.1665	0.7469	1.1613	0.9549	0.7537	1.1561		86	75	100	88	100	100
	4365			flavin mononucleotide (FMN)	LC/MS neg	15797	C00061	HMDB0001520	643976					1.26486	1.55	1.06	0.92	1.35		0.6673	0.8862	0.6149	0.8374	0.5612	0.9998	0.4887	0.9912	0.9111	1	0.949	1	0.4915	1		1.0077	0.8584	1.1571	1.0931	1.1892	1.2746	1.3279	1.2214		86	75	100	88	100	100
	4367		Pantothenate and CoA Metabolism	pantoate	LC/MS polar	63061	C00522	HMDB0240389	5289105					0.466354	0.56	0.33	0.4	0.68		0.4368	0.839	0.2248	0.7692	0.4064	0.9998	0.9703	1	0.2465	0.9942	0.1065	0.8759	0.7976	1		5.2859	6.2998	4.272	4.9144	2.8366	2.4651	3.529	1.4013		100	100	100	100	100	100
	4368			pantothenate	LC/MS pos early	1508	C00864	HMDB0000210	6613					1.1023	1.07	1.13	1.24	1.17		0.9671	0.9214	0.3878	0.8303	0.9769	0.9998	0.9615	1	0.9928	1	0.4691	0.9315	0.5925	1		0.9824	0.9039	1.061	0.9351	1.1302	1.0829	0.9664	1.1994		100	100	100	100	100	100
	4370			pantetheine	LC/MS pos early	57555	C00831	HMDB0003426	439322					1.7365	1.21	2.08	2.62	1.52		0.3866	0.8361	0.3056	0.8055	0.6389	0.9998	0.7808	1	0.3335	0.9942	0.2319	0.9315	0.7169	1		0.5943	0.4717	0.7169	0.521	1.1053	1.032	0.5703	1.4937		43	25	67	38	75	69
	4384		Ascorbate and Aldarate Metabolism	2-O-methylascorbic acid	LC/MS polar	63990		HMDB0240294	54726398					1.31675	0.86	1.79	2.04	0.98		0.8088	0.9084	0.7699	0.8572	0.8098	0.9998	0.9993	1	0.7253	0.9976	0.9665	1	0.7346	1		1.0996	1.112	1.0873	1.0318	1.5157	1.4479	0.9517	1.9441		86	100	67	100	58	69
	4385			threonate	LC/MS polar	27738	C01620	HMDB0000943 HMDB0062620	5460407;151152					0.982709	0.65	1.58	1.34	0.55		0.7652	0.9011	0.6227	0.8374	0.4907	0.9998	0.4979	0.9912	0.7735	0.9984	0.8712	0.9938	0.4537	1		1.0468	1.349	0.7446	1.1145	0.961	1.0287	0.8801	1.1774		100	100	100	100	100	100
	4388			oxalate (ethanedioate)	LC/MS neg	20694	C00209	HMDB0002329	971					0.678804	0.25	4.16	2	0.12		0.6055	0.8754	0.4692	0.8374	0.1517	0.9998	0.511	0.9912	0.158	0.9942	0.5455	0.953	0.1722	1		2.6613	4.7444	0.5783	2.9744	1.4935	1.8065	1.2044	2.4086		100	100	100	100	100	100
	4389			gulonate*	LC/MS polar	46957	C00800	HMDB0003290	152304					1.29874	1.32	1.28	1.25	1.29		0.5813	0.8754	0.4325	0.8374	0.8316	0.9998	0.5998	0.9981	0.8037	0.9984	0.6403	0.9775	0.5251	1		0.9741	0.8499	1.0984	0.9864	1.2528	1.2651	1.123	1.4072		100	100	100	100	100	100
	4392		Tocopherol Metabolism	alpha-tocopherol	LC/MS pos late	1561	C02477	HMDB0001893	86472					0.356227	0.21	0.83	1.23	0.31		0.0186	0.7678	0.1242	0.6985	0.0371	0.9998	0.004	0.6867	0.8038	0.9984	0.6061	0.9629	0.0247	1		2.9644	4.528	1.4008	2.738	1.2824	1.056	0.9481	1.1639		100	100	100	100	100	100
	4393			alpha-tocopherol acetate	LC/MS pos late	38288	C13202	HMDB0034227	2117					1.18875	0.1	1.87	29.77	1.59		0.3945	0.8361	0.8481	0.8629	0.3294	0.9998	0.2145	0.9585	0.9252	1	0.3461	0.9315	0.6128	1		0.7274	0.561	0.8938	0.3086	1.2835	0.8647	0.0562	1.6733		71	100	33	63	42	38
	4396			delta-tocopherol	LC/MS pos late	33418	C14151	HMDB0002902	92094					1.08649	1.15	1.04	1.12	1.25		0.9466	0.9178	0.5098	0.8374	0.8192	0.9998	0.9115	1	0.8295	0.9984	0.7256	0.9938	0.5722	1		1.2336	1.0977	1.3694	1.1796	1.3942	1.3403	1.2615	1.419		100	100	100	100	100	100
	4398			alpha-tocotrienol	LC/MS pos late	37502	C14153	HMDB0006327	5282347					0.573761	0.27	0.87	3.39	1.03		0.1425	0.8076	0.0929	0.6985	0.5776	0.9998	0.1662	0.9488	0.4879	0.9942	0.075	0.8348	0.4494	1		1.6167	1.5893	1.6441	1.0062	1.5381	0.9276	0.4231	1.4322		100	100	100	88	100	92
	4399			gamma-tocotrienol	LC/MS pos late	37501	C14155	HMDB0012958	5282349					0.906414	1.07	0.82	1.53	1.98		0.5505	0.8742	0.1243	0.6985	0.8696	0.9998	0.7647	1	0.5792	0.9942	0.2565	0.9315	0.2718	1		1.2972	0.8715	1.7229	0.9012	1.5718	1.1758	0.9309	1.4208		100	100	100	100	100	100
	4400			gamma-CEHC	LC/MS neg	44876		HMDB0001931	133098					0.687701	0.57	0.92	0.83	0.51		0.8682	0.9084	0.5395	0.8374	0.6928	0.9998	0.7	1	0.8669	0.9984	0.8581	0.9938	0.5218	1		1.0887	1.4386	0.7389	1.1276	0.7098	0.7487	0.8166	0.6807		57	75	33	75	50	62
	4408			delta-CEHC	LC/MS neg	62287			35027084					2.3548	2.59	2.18	1.14	1.36		0.1684	0.8076	0.8022	0.8616	0.6278	0.9998	0.2018	0.9488	0.4994	0.9942	0.8488	0.9938	0.6401	1		0.3385	0.287	0.3899	0.5153	0.6202	0.7971	0.7436	0.8505		43	0	100	38	50	46
	4414			gamma-tocopherol/beta-tocopherol	LC/MS pos late	52473	C14152 C02483	HMDB0006335 HMDB0001492						0.938977	0.82	1.1	1.04	0.78		0.5123	0.8612	0.708	0.8477	0.488	0.9998	0.3571	0.9708	0.9773	1	0.7939	0.9938	0.4975	1		1.0832	1.2204	0.946	1.1092	0.9911	1.0171	0.998	1.0362		100	100	100	100	100	100
	4416		Biotin Metabolism	biotin	LC/MS pos early	568	C00120	HMDB0000030	171548					0.981944	0.86	1.35	0.54	0.34		0.8392	0.9084	0.0264	0.5251	0.459	0.9998	0.5166	0.9944	0.6924	0.9942	0.1916	0.9315	0.0584	1		1.1243	1.6783	0.5703	1.5575	0.6708	1.104	1.4368	0.7713		100	100	100	100	100	100
	4417			biocytin	LC/MS neg	42971	C05552	HMDB0003134	83814					0.98093	0.84	1.28	0.74	0.48		0.7572	0.8961	0.0527	0.6051	0.6177	0.9998	0.8954	1	0.5568	0.9942	0.2188	0.9315	0.1175	1		0.7289	0.9819	0.4759	0.901	0.5429	0.715	0.82	0.6099		57	75	33	88	25	46
	4426		Pterin Metabolism	pterin	LC/MS neg	43023	C00715	HMDB0000802	135398660					1.12305	1.13	1.12	0.76	0.77		0.494	0.8549	0.4507	0.8374	0.7241	0.9998	0.4772	0.9912	0.807	0.9984	0.3734	0.9315	0.7956	1		0.8769	0.9928	0.7609	1.0568	0.8048	0.9848	1.1208	0.8488		71	75	67	75	67	69
	4438		Hemoglobin and Porphyrin Metabolism	protoporphyrin IX	LC/MS pos late	39321	C02191	HMDB0000241	4971					1.1208	2.5	1.05	8.14	19.38		0.875	0.9084	0.0022	0.4006	0.4947	0.9998	0.5634	0.9954	0.6996	0.9942	0.0306	0.678	0.0141	1		1.6623	0.1631	3.1615	0.2854	3.24	1.8631	0.4076	3.3185		71	50	100	63	92	85
	4440			bilirubin (Z,Z)	LC/MS pos late	43807	C00486	HMDB0000054	5280352					0.134232	0.04	0.23	6.09	1.01		0.0028	0.7598	0.0875	0.6985	0.7139	0.9998	0.0163	0.7017	0.0352	0.9942	0.0952	0.8655	0.371	1		6.4329	6.4074	6.4583	3.3254	3.9709	0.8635	0.2435	1.4835		100	100	100	75	100	85
	4441			bilirubin (E,E)*	LC/MS pos late	32586		HMDB0240584	129320511					0.196257	0.07	0.43	3.16	0.53		0.0588	0.8076	0.6992	0.8476	0.5069	0.9998	0.0806	0.9488	0.3377	0.9942	0.3987	0.9315	0.8582	1		3.046	3.9812	2.1108	2.1344	1.5095	0.5978	0.2876	0.9081		100	100	100	75	67	54
	4443			biliverdin	LC/MS pos late	2137	C00500	HMDB0001008	5280353					0.287146	0.29	0.29	1.84	1.85		0.1055	0.8076	0.2266	0.7692	0.9416	0.9998	0.276	0.9708	0.2104	0.9942	0.3529	0.9315	0.4092	1		3.0239	2.1217	3.9261	1.3664	2.5258	0.8683	0.6111	1.1255		100	100	100	100	100	100
	4444			I-urobilinogen	LC/MS neg	32426	C05789	HMDB0004157	9548718					0.76176	0.37	2.07	1.66	0.3		0.4662	0.8485	0.746	0.8527	0.5672	0.9998	0.3741	0.9759	0.9073	0.9999	0.8395	0.9938	0.5691	1		16.6374	25.6185	7.6563	17.5661	11.745	12.6737	9.5138	15.8337		100	100	100	100	100	100
	4445			D-urobilin	LC/MS pos late	40084	C05795	HMDB04161	5280820					0.717822	1.14	0.52	0.95	2.09		0.8546	0.9084	0.9155	0.8629	0.7606	0.9998	0.9333	1	0.7224	0.9976	0.74	0.9938	0.8993	1		1.9633	1.2706	2.6559	1.359	2.0136	1.4093	1.4473	1.3714		71	75	67	88	92	100
	4446			L-urobilin	LC/MS neg	40173	C05793	HMDB0240259	5280818					0.629718	0.43	0.88	1.66	0.8		0.3246	0.8076	0.4293	0.8374	0.7814	0.9998	0.6208	1	0.358	0.9942	0.6747	0.9808	0.4967	1		1.1737	1.3044	1.0431	0.9298	0.983	0.7391	0.5553	0.923		86	75	100	75	92	85
	4452		Thiamine Metabolism	thiamin (vitamin B1)	LC/MS pos early	5341	DG00125 C00378 D08580	HMDB0000235	1130					0.691854	58.61	0.02	0.03	86.32		0.7218	0.8894	0.529	0.8374	0.0035	0.9998	0.0517	0.9488	0.014	0.9942	0.0392	0.68	0.0199	1		32.6852	0.7486	64.6219	22.3129	32.9858	22.6134	43.8772	1.3497		100	100	100	100	100	100
	4455			5-(2-hydroxyethyl)-4-methylthiazole	LC/MS pos early	27673	C04294	HMDB0032985	1136					0.496389	5.49	0.09	0.21	12.33		0.3548	0.8131	0.7625	0.855	0.0141	0.9998	0.2331	0.9643	0.0157	0.9942	0.0651	0.8207	0.069	1		9.3044	1.3958	17.213	4.5272	9.3958	4.6186	7.6585	1.5787		100	100	100	100	92	92
	4456			hydroxymethylpyrimidine	LC/MS pos early	57565	C01279		777					0.639884	22.71	0.03	0.05	36.09		0.349	0.8101	0.4551	0.8374	0.0014	0.9998	0.0642	0.9488	0.0029	0.9942	0.0237	0.6162	0.0096	1		15.1451	0.8167	29.4734	9.6816	15.1546	9.6911	18.5465	0.8357		100	100	100	100	100	100
	4463		Vitamin A Metabolism	carotene diol (1)	LC/MS pos late	57635								1.65335	1.74	1.53	0.59	0.67		0.0991	0.8076	0.4983	0.8374	0.3733	0.9998	0.0856	0.9488	0.5514	0.9942	0.2117	0.9315	0.8889	1		0.9459	1.1316	0.7603	1.5487	0.9612	1.5639	1.9658	1.1621		100	100	100	100	100	100
	4464			carotene diol (2)	LC/MS pos late	57636								1.16115	1.22	1.08	0.67	0.76		0.4581	0.8452	0.5421	0.8374	0.4843	0.9998	0.3254	0.9708	0.9746	1	0.295	0.9315	0.9535	1		1.1157	1.2715	0.96	1.4127	0.9985	1.2955	1.554	1.0371		100	100	100	100	100	100
	4465			carotene diol (3)	LC/MS pos late	57637								1.39265	2	0.99	0.75	1.52		0.176	0.8076	0.8301	0.8616	0.0742	0.9998	0.0362	0.8938	0.7233	0.9976	0.1901	0.9315	0.1945	1		0.8295	0.6596	0.9994	0.9905	0.9941	1.1552	1.3215	0.9888		57	25	100	63	100	100
	4466			astaxanthin	LC/MS pos late	38652	C08580	HMDB0002204	5281224					1.49993	1.96	1.04	0.53	1		0.2252	0.8076	0.3021	0.8055	0.3021	0.9998	0.1292	0.9488	0.8886	0.9991	0.1039	0.8742	1	1		0.7425	0.7425	0.7425	1.0994	0.7568	1.1137	1.4564	0.7711		14	0	33	13	17	15
	4467			beta-cryptoxanthin	LC/MS pos late	57591	C08591	HMDB0033844	5281235					1.26709	3.56	0.76	0.98	4.55		0.2803	0.8076	0.1348	0.7149	0.031	0.9998	0.0293	0.7946	0.3769	0.9942	0.5323	0.9484	0.0234	1		0.9555	0.3441	1.567	0.784	1.3822	1.2107	1.2239	1.1975		100	100	100	100	100	100
	4477		Vitamin B6 Metabolism	pyridoxine (vitamin B6)	LC/MS polar	608	D08454	HMDB0000239	1054					1.20747	0.69	1.78	2.31	0.9		0.7553	0.8961	0.3053	0.8055	0.5905	0.9998	0.8753	1	0.5367	0.9942	0.2119	0.9315	0.7498	1		0.7201	0.7595	0.6806	0.6427	0.9469	0.8695	0.5259	1.2132		43	25	67	25	83	69
	4479			pyridoxamine	LC/MS pos early	2150	C00534	HMDB0001431	1052					1.32709	1.41	1.24	0.82	0.94		0.4259	0.8361	0.6686	0.8462	0.6249	0.9998	0.3794	0.9767	0.8193	0.9984	0.4608	0.9315	0.9688	1		0.993	1.026	0.9599	1.2368	1.0739	1.3178	1.4476	1.188		100	100	100	100	100	100
	4482			pyridoxal	LC/MS pos early	1651	C00250	HMDB0001545	1050					0.882037	1.11	0.72	0.93	1.42		0.3071	0.8076	0.3657	0.82	0.2209	0.9998	0.8823	1	0.109	0.9942	0.7851	0.9938	0.1798	1		1.1724	0.9692	1.3755	1.0205	1.186	1.0341	1.0717	0.9964		100	100	100	100	100	100
	4483			pyridoxate	LC/MS neg	31555	C00847	HMDB0000017	6723					0.858243	0.98	0.71	0.58	0.8		0.7426	0.8932	0.5633	0.8374	0.4246	0.9998	0.4396	0.9908	0.7282	0.9976	0.8553	0.9938	0.3831	1		1.298	1.4455	1.1505	1.4296	0.9825	1.114	1.4136	0.8145		100	100	100	100	100	100
	4488		Vitamin D Metabolism	vitamin D3 sulfate	LC/MS polar	64558			71752977					0.342542	0.48	0.3	1.94	3.13		0.0031	0.7598	0.0019	0.4006	0.5064	0.9998	0.0721	0.9488	0.0079	0.9942	0.0257	0.626	0.0128	1		2.3565	1.1408	3.5722	0.8446	2.3191	0.8072	0.5485	1.0659		100	100	100	100	100	100
	4494	Xenobiotics	Benzoate Metabolism	hippurate	LC/MS neg	15753	C01586	HMDB0000714	464					2.57216	4.14	1	0.24	1		0.2521	0.8076	0.2521	0.7692	0.2521	0.9998	0.122	0.9488	1	1	0.0727	0.8295	1	1		0.1372	0.1372	0.1372	0.3529	0.1372	0.3529	0.5686	0.1372		0	0	0	13	8	15
	4498			2-hydroxyhippurate (salicylurate)	LC/MS neg	18281	C07588	HMDB0000840	10253					1.4351	2.02	1.09	0.93	1.72		0.308	0.8076	0.3896	0.8303	0.3699	0.9998	0.1934	0.9488	0.9256	1	0.9756	1	0.2672	1		0.6341	0.4659	0.8022	0.7046	0.8395	0.91	0.9433	0.8767		57	50	67	50	75	69
	4500			3-hydroxyhippurate	LC/MS neg	39600		HMDB0006116	450268					1.25044	0.85	1.64	2	1.04		0.4784	0.8485	0.3101	0.8082	0.4393	0.9998	0.9637	1	0.2846	0.9942	0.156	0.9157	0.8731	1		1.0785	1.0569	1.1001	0.9774	1.4497	1.3486	0.8978	1.7994		86	100	67	100	92	100
	4502			4-hydroxyhippurate	LC/MS polar	35527		HMDB0013678	151012					2.15128	2.33	2	1.04	1.22		0.0883	0.8076	0.8106	0.8616	0.7585	0.9998	0.163	0.9488	0.2897	0.9942	0.9561	1	0.728	1		0.6498	0.5867	0.7129	0.9772	1.0705	1.3979	1.3677	1.428		57	50	67	63	75	77
	4509			benzoate	LC/MS neg	15778	C00180	HMDB0001870	243					0.842136	0.8	0.88	1.05	0.96		0.4731	0.8485	0.9487	0.8674	0.6884	0.9998	0.4436	0.9908	0.815	0.9984	0.7066	0.9938	0.83	1		1.2156	1.2395	1.1916	1.118	1.1212	1.0237	0.9966	1.0508		100	100	100	100	100	100
	4519			4-hydroxybenzoate	LC/MS neg	21133	C00156	HMDB0000500	135					1.1261	1.48	0.93	1.11	1.77		0.6939	0.8894	0.3675	0.82	0.5179	0.9998	0.4761	0.9912	0.8519	0.9984	0.8323	0.9938	0.3272	1		0.4758	0.3434	0.6083	0.4254	0.5863	0.5358	0.5073	0.5644		14	0	33	25	33	38
	4521			2,4,6-trihydroxybenzoate	LC/MS neg	35892		HMDB0029649	66520					8.55869	14.43	3.96	0.35	1.28		0.0117	0.7678	0.235	0.7692	0.1385	0.9998	0.008	0.6867	0.362	0.9942	0.0382	0.68	0.8387	1		0.4711	0.4137	0.5285	3.1912	1.3119	4.032	5.9687	2.0953		43	25	67	63	67	77
	4524			3,4-dihydroxybenzoate	LC/MS neg	18292	C00230	HMDB0001856	72					2.96091	3.55	2.25	0.53	0.83		0.0252	0.7678	0.276	0.7906	0.4585	0.9998	0.0413	0.9488	0.2308	0.9942	0.1465	0.9157	0.8178	1		0.3658	0.3993	0.3324	0.9086	0.5403	1.0831	1.418	0.7482		43	50	33	63	50	62
	4526			3,5-dihydroxybenzoic acid	LC/MS neg	37508		HMDB0013677	7424					1.35643	1.85	1.02	0.82	1.49		0.1862	0.8076	0.6828	0.8475	0.2885	0.9998	0.1078	0.9488	0.8391	0.9984	0.589	0.9599	0.3497	1		0.5513	0.4428	0.6598	0.6318	0.6673	0.7478	0.8209	0.6748		14	0	33	25	58	62
	4531			catechol sulfate	LC/MS neg	35320		HMDB0059724	3083879					0.587824	0.62	0.57	1.99	2.15		0.7191	0.8894	0.4128	0.8374	0.9776	0.9998	0.7897	1	0.8088	0.9984	0.4922	0.9385	0.6124	1		0.6439	0.4091	0.8787	0.3311	0.6913	0.3785	0.2532	0.5039		29	25	33	38	42	46
	4538			4-methylcatechol sulfate	LC/MS neg	46146		HMDB0240459	54104170					0.918757	3	0.52	0.88	5.14		0.603	0.8754	0.5872	0.8374	0.2694	0.9998	0.2667	0.9708	0.6606	0.9942	0.6396	0.9775	0.296	1		1.2555	0.4088	2.1021	0.8166	1.5923	1.1535	1.2244	1.0826		57	50	67	63	75	77
	4543			p-hydroxybenzaldehyde	LC/MS neg	17665	C00633	HMDB0011718	126					2.24507	2.47	1.83	0.41	0.55		0.0413	0.8076	0.0197	0.525	0.943	0.9998	0.1597	0.9488	0.1143	0.9942	0.0585	0.7927	0.1094	1		0.872	1.1244	0.6197	1.9534	0.8764	1.9577	2.7823	1.1331		86	100	67	100	92	100
	4547			p-aminobenzoate (PABA)	LC/MS pos early	596	C00568	HMDB0001392	978					0.772628	0.61	1.11	0.89	0.49		0.2871	0.8076	0.5826	0.8374	0.4359	0.9998	0.21	0.9543	0.8286	0.9984	0.8496	0.9938	0.3996	1		1.834	2.4664	1.2016	1.9828	1.2682	1.417	1.4991	1.3349		100	100	100	100	100	100
	4573			3-(2-hydroxyphenyl)propionate	LC/MS neg	35634	C01198	HMDB0033752	6930705					2.59013	2.85	2.4	1.19	1.41		0.2165	0.8076	0.5281	0.8374	0.9951	0.9998	0.3874	0.9773	0.3645	0.9942	0.6126	0.9644	0.6841	1		0.2147	0.1781	0.2514	0.343	0.4278	0.5561	0.508	0.6042		14	0	33	25	42	46
	4584			p-cresol	LC/MS neg	33444	C01468	HMDB0001858	2879					0.608716	0.56	0.69	0.75	0.6		0.1223	0.8076	0.3408	0.8125	0.9532	0.9998	0.2622	0.9708	0.2687	0.9942	0.4666	0.9315	0.517	1		1.698	2.1189	1.2771	1.6506	1.081	1.0336	1.1823	0.8849		100	100	100	100	92	92
	4585			p-cresol sulfate	LC/MS neg	36103		HMDB0011635	4615423					0.922846	1.39	0.63	0.74	1.64		0.5819	0.8754	0.6934	0.8476	0.4702	0.9998	0.9043	1	0.3568	0.9942	0.7879	0.9938	0.4783	1		1.6668	1.2651	2.0685	1.5145	1.6905	1.5382	1.7638	1.3126		100	100	100	100	100	100
	4595			2-methylbutyrylphenylalanine	LC/MS neg	44580			16791623					0.986849	0.61	1.73	1.43	0.51		0.917	0.9084	0.7041	0.8476	0.3265	0.9998	0.5421	0.9954	0.4271	0.9942	0.6199	0.9682	0.3866	1		0.7452	0.9893	0.5011	0.7978	0.6828	0.7354	0.6062	0.8645		57	75	33	63	50	54
	4601			3-(3-hydroxyphenyl)propionate sulfate	LC/MS neg	45415		HMDB0094710	187488					0.549629	0.54	0.59	0.13	0.12		0.8797	0.9084	0.2967	0.8055	0.7512	0.9998	0.9091	1	0.733	0.9976	0.2739	0.9315	0.637	1		2.7071	4.8252	0.5891	3.7258	0.4692	1.4879	2.6265	0.3493		29	25	33	38	33	38
	4604			3-(3-hydroxyphenyl)propionate	LC/MS neg	35635	C11457	HMDB0000375	91					1.10835	1.12	1.01	0.12	0.14		0.9006	0.9084	0.3354	0.8125	0.9184	0.9998	0.8759	1	0.9869	1	0.4825	0.9385	0.4951	1		6.5287	11.4702	1.5871	12.173	1.5918	7.2361	12.8758	1.5965		86	75	100	88	92	92
	4606			3-(4-hydroxyphenyl)propionate	LC/MS neg	39587	C01744	HMDB0002199	10394					3.05785	3.33	1.79	0.12	0.22		0.6803	0.8894	0.2519	0.7692	0.8154	0.9998	0.6577	1	0.8959	0.9991	0.2658	0.9315	0.5535	1		1.4072	2.3152	0.4992	5.0148	0.6954	4.303	7.7144	0.8916		71	75	67	75	58	62
	4607			3-phenylpropionate (hydrocinnamate)	LC/MS neg	15749	C05629	HMDB0000764	107					1.511	4.39	1.32	4.56	15.14		0.5128	0.8612	0.0382	0.5456	0.1863	0.9998	0.178	0.9488	0.6112	0.9942	0.4878	0.9385	0.0342	1		1.6632	0.2061	3.1202	0.5554	3.6209	2.5131	0.9046	4.1217		100	100	100	100	100	100
	4608			2,4-dihydroxyhydrocinnamate	LC/MS neg	47113		HMDB0126386	96384					0.335056	2.66	0.07	0.25	8.87		0.7813	0.9061	0.8161	0.8616	0.0424	0.9998	0.205	0.9488	0.0886	0.9942	0.0659	0.8207	0.2283	1		3.5024	0.7094	6.2953	1.2972	3.3787	1.1735	1.885	0.4621		57	25	100	50	42	38
	4609			3,5-dihydroxyphenylpropionate	LC/MS polar	63342		HMDB0125533	161525					2.28364	1.2	2.59	7.6	3.53		0.908	0.9084	0.1795	0.7446	0.9983	0.9998	0.9378	1	0.9316	1	0.2723	0.9315	0.3857	1		0.8747	0.3865	1.3629	0.4255	2.4467	1.9975	0.4646	3.5305		43	25	67	38	58	54
	4617			2-methoxyhydroquinone sulfate (1)	LC/MS neg	64049								1.03875	1.06	1.02	0.96	1		0.2261	0.8076	0.479	0.8374	0.479	0.9998	0.1917	0.9488	0.7022	0.9942	0.2583	0.9315	1	1		0.8749	0.8749	0.8749	0.9019	0.8818	0.9088	0.9289	0.8888		0	0	0	25	8	23
	4623		Xanthine Metabolism	caffeine	LC/MS pos early	569	C07481	HMDB0001847	2519					1.1177	1.76	0.74	0.72	1.71		0.7746	0.9043	0.5341	0.8374	0.3039	0.9998	0.3661	0.9721	0.5819	0.9942	0.7345	0.9938	0.2961	1		1.1946	0.8812	1.508	1.2154	1.3145	1.3352	1.5495	1.1209		71	50	100	75	83	85
	4624			paraxanthine	LC/MS pos early	18254	C13747	HMDB0001860	4687					1.65999	2.59	1.05	0.62	1.53		0.2965	0.8076	0.5962	0.8374	0.443	0.9998	0.218	0.9622	0.8338	0.9984	0.8448	0.9938	0.4109	1		0.8288	0.6554	1.0022	1.1767	1.0279	1.3758	1.6979	1.0537		71	75	67	75	83	85
	4625			theobromine	LC/MS pos early	18392	C07480	HMDB0002825	5429					3.1498	4.53	2.54	1.27	2.26		0.3131	0.8076	0.3129	0.8082	0.7275	0.9998	0.3516	0.9708	0.6234	0.9942	0.5861	0.9599	0.3874	1		0.3805	0.2336	0.5274	0.6454	0.9336	1.1985	1.0572	1.3397		43	25	67	38	83	77
	4626			theophylline	LC/MS neg	18394	C07130	HMDB0001889	2153					0.961762	1.36	0.72	0.88	1.66		0.9507	0.9196	0.6964	0.8476	0.5653	0.9998	0.7233	1	0.6421	0.9942	0.8799	0.9953	0.5399	1		1.2553	0.9451	1.5656	1.1151	1.3476	1.2073	1.2851	1.1296		71	50	100	63	83	77
	4627			1-methylurate	LC/MS pos early	34395	C16359	HMDB0003099	69726					0.411199	0.26	0.78	1.21	0.41		0.7703	0.9017	0.925	0.865	0.9124	0.9998	0.7824	1	0.8943	0.9991	0.8689	0.9938	0.9919	1		1.1126	1.579	0.6462	0.9962	0.5739	0.4575	0.4134	0.5016		43	25	67	50	50	54
	4629			1,3-dimethylurate	LC/MS neg	32391		HMDB0001857	70346					0.624029	0.84	0.48	0.84	1.49		0.9936	0.9214	0.5653	0.8374	0.3434	0.9998	0.5083	0.9912	0.4905	0.9942	0.757	0.9938	0.3347	1		1.5448	1.2388	1.8507	1.1426	1.3661	0.964	1.0463	0.8816		86	75	100	75	75	69
	4630			1,7-dimethylurate	LC/MS neg	34400	C16356	HMDB0011103	91611					1.30234	1.3	1.31	0.63	0.63		0.2918	0.8076	0.5127	0.8374	0.623	0.9998	0.2903	0.9708	0.6735	0.9942	0.8935	0.9953	0.4671	1		0.8593	1.054	0.6646	1.2115	0.7669	1.1191	1.369	0.8692		86	75	100	88	100	100
	4631			3,7-dimethylurate	LC/MS neg	34399	C16360	HMDB0001982	83126					4.58315	7.83	3.49	1.32	2.96		0.0064	0.7598	0.2431	0.7692	0.2307	0.9998	0.0083	0.6867	0.1883	0.9942	0.9785	1	0.1374	1		0.4546	0.2295	0.6796	1.0135	1.5246	2.0835	1.7974	2.3695		86	75	100	88	100	100
	4632			1,3,7-trimethylurate	LC/MS neg	34404	C16361	HMDB0002123	79437					0.405752	0.14	0.54	7.58	2.01		0.4918	0.8549	0.2626	0.7803	0.9412	0.9998	0.6715	1	0.5783	0.9942	0.3928	0.9315	0.4432	1		6.711	4.4612	8.9607	2.5481	6.8858	2.723	0.635	4.8109		100	100	100	100	100	100
	4633			1-methylxanthine	LC/MS neg	34389	C16358	HMDB0010738	80220					1.98094	2.82	1.22	0.48	1.1		0.3272	0.8076	0.919	0.8629	0.3616	0.9998	0.199	0.9488	0.9591	1	0.4116	0.9315	0.6022	1		0.7869	0.7483	0.8255	1.4282	0.9175	1.5588	2.1081	1.0095		86	75	100	75	83	77
	4634			3-methylxanthine	LC/MS neg	32445	C16357	HMDB0001886	70639					1.44992	1.17	1.79	1.25	0.81		0.2995	0.8076	0.8256	0.8616	0.6419	0.9998	0.6864	1	0.2764	0.9942	0.8424	0.9938	0.663	1		0.7648	0.8437	0.686	0.9157	0.958	1.1089	0.9878	1.23		14	25	0	38	50	62
	4635			7-methylxanthine	LC/MS pos early	34390	C16353	HMDB0001991	68374					1.08543	0.65	1.97	1.51	0.5		0.5842	0.8754	0.7811	0.8572	0.2666	0.9998	0.6893	1	0.2306	0.9942	0.4926	0.9385	0.3752	1		0.707	0.9456	0.4684	0.7787	0.6957	0.7674	0.6117	0.9231		29	25	33	38	42	46
	4636			5-acetylamino-6-amino-3-methyluracil	LC/MS polar	34424	C16366	HMDB0004400	88299					1.12183	0.78	1.69	1.32	0.61		0.5583	0.8754	0.6046	0.8374	0.8201	0.9998	0.5768	0.9954	0.7927	0.9984	0.8133	0.9938	0.6356	1		1.3059	1.6265	0.9854	1.444	1.327	1.465	1.2615	1.6686		100	100	100	100	100	100
	4637			5-acetylamino-6-formylamino-3-methyluracil	LC/MS polar	34401	C16365	HMDB0011105	108214					1.39761	0.96	1.47	9.53	6.26		0.8766	0.9084	0.0198	0.525	0.8624	0.9998	0.9901	1	0.8108	0.9984	0.04	0.68	0.1444	1		0.753	0.2074	1.2985	0.2036	1.6017	1.0524	0.1998	1.9049		43	25	67	50	75	77
	4664		Food Component/Plant	piperidine	LC/MS pos early	38183	C01746	HMDB0034301	8082					0.653214	0.37	0.95	2.42	0.95		0.761	0.8972	0.4343	0.8374	0.8575	0.9998	0.9316	1	0.7246	0.9976	0.4376	0.9315	0.6987	1		2.7602	2.832	2.6884	1.9435	2.6197	1.803	1.0549	2.5511		100	100	100	100	100	100
	4669			2-piperidinone	LC/MS pos early	43400		HMDB0011749	12665					0.932421	0.72	1.09	2.07	1.36		0.4742	0.8485	0.2221	0.7692	0.8277	0.9998	0.7298	1	0.4967	0.9942	0.4088	0.9315	0.3567	1		1.425	1.2082	1.6417	1.0374	1.7163	1.3287	0.8666	1.7908		100	100	100	100	100	100
	4714			erythrose	LC/MS neg	27722	C01796	HMDB0002649	94176					0.393873	0.43	0.37	1.51	1.74		0.0986	0.8076	0.2812	0.7906	0.5897	0.9998	0.4205	0.9834	0.1125	0.9942	0.6539	0.9804	0.305	1		2.7646	2.0177	3.5116	1.4435	2.41	1.0889	0.8693	1.3084		100	100	100	88	83	77
	4715			sucralose	LC/MS neg	36649	C12285	HMDB0031554	71485					0.299405	0.03	17.13	8.99	0.02		0.6558	0.8843	0.648	0.8374	0.2331	0.9998	0.2616	0.9708	0.5751	0.9942	0.1871	0.9315	0.6291	1		7.1101	13.9965	0.2237	7.2113	2.0276	2.1288	0.426	3.8316		86	75	100	75	92	85
	4728			3-dehydroshikimate	LC/MS polar	36764	C02637		439774					1.15183	0.91	1.58	0.99	0.56		0.6174	0.8754	0.4274	0.8374	0.7895	0.9998	0.8721	1	0.5771	0.9942	0.6666	0.9808	0.4996	1		0.9458	1.2089	0.6827	1.1532	0.8821	1.0894	1.0974	1.0814		71	75	67	88	75	85
	4738			1-methyl-beta-carboline-3-carboxylic acid	LC/MS neg	43449			5406157					0.883315	3.63	0.01	0.01	3.14		0.5774	0.8754	0.7444	0.8527	0.2115	0.9998	0.6215	1	0.1917	0.9942	0.2052	0.9315	0.5459	1		38.4624	18.563	58.3619	42.9338	29.503	33.9744	67.3046	0.6441		71	50	100	50	58	46
	4743			1,1-kestotetraose	LC/MS neg	39796		HMDB0039176	3707011					1.91912	0.66	3.28	4.62	0.93		0.9231	0.9084	0.6919	0.8476	0.9313	0.9998	0.9001	1	0.994	1	0.8016	0.9938	0.7587	1		1.1672	1.2119	1.1225	1.0045	2.4027	2.24	0.7971	3.6829		57	50	67	63	58	62
	4747			ginkgolic acid C13:0	LC/MS polar	64190		HMDB38520	161306					1.55109	1.15	1.96	1.71	1		0.4146	0.8361	0.7054	0.8476	0.7054	0.9998	0.7598	1	0.3861	0.9942	0.5424	0.9523	1	1		0.5774	0.5774	0.5774	0.6196	0.8534	0.8956	0.6618	1.1294		0	0	0	25	17	31
	4748			(15:0)-anacardic acid	LC/MS neg	40719	C10759	HMDB0033896	167551					1.28818	1	1.58	1.58	1		0.6342	0.8754	0.6342	0.8374	0.6342	0.9998	1	1	0.4897	0.9942	0.4442	0.9315	1	1		0.2783	0.2783	0.2783	0.2783	0.3585	0.3585	0.2783	0.4386		0	0	0	13	8	15
	4749			ginkgolic acid C15:1	LC/MS polar	64200	C10794		5281858					320.601	159.17	407.17	4.77	1.86		0.0676	0.8076	0.8922	0.8629	0.7544	0.9998	0.137	0.9488	0.2489	0.9942	0.8857	0.9953	0.7755	1		0.107	0.0747	0.1393	5.9823	28.4291	34.3043	11.8898	56.7188		29	0	67	38	67	69
	4750			(15:2)-anacardic acid	LC/MS neg	41397		HMDB0033896	11824131					16.4815	15.3	17.66	1.15	1		0.2168	0.8076	0.7949	0.861	0.7949	0.9998	0.3026	0.9708	0.4674	0.9942	0.6747	0.9808	1	1		0.4133	0.4133	0.4133	3.3683	3.8568	6.8118	6.3233	7.3003		14	25	0	38	25	38
	4751			(15:3)-anacardic acid	LC/MS neg	64092		HMDB31059	9875131					29.2784	30.01	28.72	1.24	1.29		0.1702	0.8076	0.8647	0.8629	0.9286	0.9998	0.3095	0.9708	0.3414	0.9942	0.9479	1	0.8687	1		0.3118	0.2718	0.3518	4.2137	5.2271	9.129	8.1556	10.1024		29	0	67	25	67	62
	4752			ginkgolic acid C17:1	LC/MS polar	64206		HMDB38522	5469634					5.32017	1.72	8.92	5.19	1		0.2999	0.8076	0.6811	0.8475	0.6811	0.9998	0.6598	1	0.2936	0.9942	0.5081	0.9438	1	1		0.2583	0.2583	0.2583	0.351	1.2815	1.3742	0.4437	2.3047		0	0	0	25	25	38
	4766			apigenin	LC/MS neg	21189	C01477	HMDB0002124	5280443					0.942277	3.44	0.56	1.05	6.48		0.4167	0.8361	0.3809	0.8298	0.3726	0.9998	0.2464	0.9708	0.9522	1	0.9897	1	0.2643	1		1.5557	0.4159	2.6954	0.9224	2.0992	1.4659	1.4288	1.503		57	50	67	63	67	69
	4780			levulinate (4-oxovalerate)	LC/MS neg	22177		HMDB0000720	11579					0.843422	0.82	0.87	1.35	1.27		0.5053	0.86	0.3025	0.8055	0.8775	0.9998	0.723	1	0.5499	0.9942	0.473	0.9315	0.4482	1		1.1151	0.9807	1.2496	0.89	1.1656	0.9405	0.7993	1.0816		100	100	100	88	100	92
	4785			vanillate	LC/MS neg	35639	C06672	HMDB0000484	8468					3.3258	3.88	2.81	0.78	1.08		0.0191	0.7678	0.8614	0.8629	0.714	0.9998	0.0574	0.9488	0.123	0.9942	0.6622	0.9808	0.9025	1		0.4334	0.4167	0.45	1.0169	0.8578	1.4414	1.6171	1.2657		29	25	33	63	58	77
	4790			vanillin	LC/MS neg	37442	C00755	HMDB0012308	1183					3.31735	3.09	4.53	0.28	0.19		0.204	0.8076	0.0826	0.6865	0.9868	0.9998	0.3704	0.9721	0.3548	0.9942	0.1503	0.9157	0.2601	1		2.1988	3.6988	0.6989	7.5598	1.9333	7.2942	11.4208	3.1677		100	100	100	100	100	100
	4805			2,3-dihydroxyisovalerate	LC/MS polar	38276	C04039	HMDB0012141	677					4.20064	7.33	1.41	0.22	1.12		0.0578	0.8076	0.1777	0.743	0.1546	0.9998	0.0272	0.7592	0.6941	0.9942	0.032	0.678	0.9578	1		0.776	0.7309	0.8212	3.0459	0.9899	3.2597	5.3608	1.1587		100	100	100	100	92	92
	4809			2,8-quinolinediol	LC/MS pos early	42975	C06342	HMDB0240311	97250					0.262625	5.63	0.16	1.47	51.93		0.8232	0.9084	0.4733	0.8374	0.4131	0.9998	0.4738	0.9912	0.661	0.9942	0.9328	0.9962	0.3313	1		12.8807	0.4867	25.2746	1.6135	14.6499	3.3828	2.7404	4.0252		71	50	100	63	75	69
	4811			20-hydroxyecdysone	LC/MS neg	27446	C02633	HMDB0030180	5459840					1.07699	1	1.15	1.15	1		0.6342	0.8754	0.6342	0.8374	0.6342	0.9998	1	1	0.4897	0.9942	0.4442	0.9315	1	1		0.591	0.591	0.591	0.591	0.6365	0.6365	0.591	0.6819		0	0	0	13	8	15
	4813			2-isopropylmalate	LC/MS polar	15667	C02504	HMDB0000402	77					1.64479	1.42	1.92	1.12	0.83		0.2025	0.8076	0.5162	0.8374	0.9538	0.9998	0.3956	0.9802	0.3268	0.9942	0.6313	0.9747	0.6519	1		0.893	0.9781	0.8079	1.1832	1.1787	1.4688	1.3882	1.5494		100	100	100	100	100	100
	4814			2-oxindole-3-acetate	LC/MS neg	40479		HMDB0035514	3080590					1.56179	2.08	1.11	0.61	1.14		0.6533	0.8826	0.7993	0.861	0.279	0.9998	0.2941	0.9708	0.6356	0.9942	0.4958	0.9386	0.3932	1		0.9792	0.9148	1.0437	1.4092	1.0994	1.5293	1.9035	1.1551		100	100	100	100	100	100
	4818			3-formylindole	LC/MS neg	62863	C08493	HMDB29737	10256					0.762233	0.61	1	1.01	0.62		0.2935	0.8076	0.2717	0.7906	0.263	0.9998	0.1422	0.9488	0.9576	1	0.9861	1	0.163	1		1.3202	1.6277	1.0127	1.3135	1.013	1.0063	0.9993	1.0133		100	100	100	100	100	100
	4830			4-hydroxycyclohexylcarboxylic acid	LC/MS pos early	43516	C04404	HMDB0001988	151138					1.22603	0.4	2.16	4.87	0.89		0.6064	0.8754	0.9295	0.8665	0.5269	0.9998	0.4322	0.9885	0.9307	1	0.5597	0.9559	0.7277	1		1.5268	1.6137	1.4398	1.1259	2.2728	1.8719	0.638	3.1058		86	75	100	63	75	62
	4835			5-hydroxymethylfurfural	LC/MS pos early	37429	C11101	HMDB0034355	237332					0.50614	0.66	0.43	1.29	1.97		0.4075	0.8361	0.9337	0.8671	0.9162	0.9998	0.5199	0.9954	0.5953	0.9942	0.9857	1	0.9046	1		2.7605	1.8568	3.6641	1.5374	2.6203	1.3972	1.2179	1.5764		100	100	100	100	100	100
	4838			gluconate	LC/MS polar	587	C00257	HMDB0000625	3085666;10690					0.78104	0.94	0.75	4.29	5.37		0.6114	0.8754	0.0574	0.6327	0.7945	0.9998	0.864	1	0.5761	0.9942	0.1686	0.9157	0.1606	1		2.7078	0.8501	4.5655	0.825	3.9977	2.1149	0.7999	3.4299		100	100	100	100	100	100
	4861			beta-guanidinopropanoate	LC/MS pos early	35101	C03065	HMDB0013222	67701					1.23043	1.53	0.93	0.62	1.01		0.3796	0.8361	0.9287	0.8664	0.2457	0.9998	0.1667	0.9488	0.8288	0.9984	0.381	0.9315	0.4218	1		0.9465	0.9425	0.9506	1.1923	0.9188	1.1646	1.4421	0.8871		71	50	100	75	92	92
	4862			biochanin A	LC/MS neg	21181	C00814	HMDB0002338	5280373					1.41844	1	1.52	6.04	3.97		0.9119	0.9084	0.1167	0.6985	0.9119	0.9998	1	1	0.8719	0.9984	0.1714	0.9208	0.3399	1		0.3764	0.1516	0.6011	0.1516	0.7587	0.5339	0.1516	0.9162		29	25	33	13	42	31
	4864			caffeate	LC/MS neg	21177	C01197	HMDB0001964	689043					11.5481	3.66	17.01	6.71	1.44		0.0873	0.8076	0.7383	0.8527	0.9238	0.9998	0.2059	0.9488	0.2268	0.9942	0.8468	0.9938	0.7845	1		0.5059	0.414	0.5978	0.9646	5.3834	5.8422	1.5153	10.169		71	75	67	88	75	85
	4867			dihydrocaffeate sulfate (2)	LC/MS neg	62524								2.01336	0.89	3.28	3.28	0.89		0.6477	0.8813	0.6477	0.8374	0.457	0.9998	0.8411	1	0.3841	0.9942	0.3356	0.9315	0.8527	1		0.5539	0.5872	0.5206	0.5539	1.1152	1.1152	0.5206	1.7098		29	25	33	13	25	15
	4871			calystegine A3	LC/MS pos early	63338		HMDB0038593	4486820					1.24832	1.1	1.55	0.67	0.48		0.2965	0.8076	0.0308	0.5362	0.6354	0.9998	0.6877	1	0.2715	0.9942	0.1469	0.9157	0.0884	1		1.2194	1.6502	0.7887	1.7356	1.006	1.5222	1.821	1.2233		100	100	100	100	100	100
	4877			chlorogenate	LC/MS neg	34120	C00852	HMDB0003164	1794427					1.58952	1.61	1.56	0.97	1		0.1695	0.8076	0.9876	0.8766	0.9876	0.9998	0.3427	0.9708	0.3048	0.9942	0.9799	1	1	1		0.3491	0.3491	0.3491	0.4563	0.4477	0.5549	0.5636	0.5463		14	0	33	13	33	31
	4881			ciliatine (2-aminoethylphosphonate)	LC/MS pos early	15125	C03557	HMDB0011747	339					2.28806	0.98	3.08	5.16	1.65		0.53	0.8664	0.095	0.6985	0.5063	0.9998	0.9795	1	0.3496	0.9942	0.0646	0.8207	0.4962	1		0.4447	0.3357	0.5537	0.3331	1.1291	1.0175	0.3306	1.7044		43	25	67	13	67	46
	4898			cryptochlorogenic acid	LC/MS neg	41924		HMDB0030653	9798666					1.91097	1.85	1.97	1.06	1		0.1797	0.8076	0.9218	0.8648	0.9218	0.9998	0.3837	0.9767	0.2896	0.9942	0.8739	0.9948	1	1		0.2269	0.2269	0.2269	0.3236	0.337	0.4336	0.4202	0.447		0	0	0	13	33	38
	4904			daidzein	LC/MS neg	32453	C10208	HMDB0003312	5281708					0.317409	0.63	0.13	0.34	1.64		0.6638	0.8857	0.8222	0.8616	0.3468	0.9998	0.3463	0.9708	0.7062	0.9942	0.3472	0.9315	0.6438	1		7.502	5.6906	9.3133	4.626	5.2572	2.3812	3.5614	1.2011		57	25	100	63	100	100
	4908			deoxymugineic acid	LC/MS pos early	57394								1.77376	0.62	4.34	3.12	0.45		0.6167	0.8754	0.886	0.8629	0.6225	0.9998	0.9954	1	0.4712	0.9942	0.6077	0.9634	0.8235	1		1.0763	1.4861	0.6664	1.2059	1.7795	1.9091	0.9257	2.8926		71	50	100	75	92	92
	4911			digalacturonic acid	LC/MS neg	21046	C02273	HMDB0039721	6857565;439694					4.2509	2.82	5.28	2.62	1.4		0.1718	0.8076	0.5694	0.8374	0.9935	0.9998	0.3375	0.9708	0.3153	0.9942	0.6496	0.9784	0.7127	1		0.499	0.4157	0.5822	0.7932	1.827	2.1212	1.1707	3.0717		57	50	67	50	58	54
	4912			dihydroferulate	LC/MS neg	40481		HMDB0062121	14340					3.67597	11.74	1.11	0.3	3.15		0.1772	0.8076	0.5299	0.8374	0.1187	0.9998	0.0516	0.9488	0.8651	0.9984	0.4276	0.9315	0.1643	1		0.9891	0.4769	1.5013	3.0381	1.5869	3.6359	5.5993	1.6726		100	100	100	100	100	100
	4913			dihydroferulic acid sulfate	LC/MS neg	62857		HMDB0041724	187489					10.1466	19.3	1	0.05	1		0.2521	0.8076	0.2521	0.7692	0.2521	0.9998	0.122	0.9488	1	1	0.0727	0.8295	1	1		0.0266	0.0266	0.0266	0.2699	0.0266	0.2699	0.5133	0.0266		0	0	0	25	0	15
	4919			enterodiol	LC/MS neg	39630	C18166	HMDB0005056	123725					9.24017	12.82	5.19	0.36	0.89		0.018	0.7678	0.3462	0.8125	0.3818	0.9998	0.0273	0.7592	0.2236	0.9942	0.15	0.9157	0.9644	1		0.1882	0.1997	0.1768	1.3802	0.5471	1.739	2.5607	0.9174		57	75	33	75	50	62
	4920			enterolactone	LC/MS neg	39626	C18165	HMDB0006101	114739					3.69976	10.26	0.9	0.21	2.35		0.1173	0.8076	0.7451	0.8527	0.0273	0.9998	0.0127	0.6867	0.5813	0.9942	0.0404	0.68	0.2008	1		0.6668	0.3984	0.9353	2.2432	0.8906	2.467	4.088	0.846		86	75	100	88	100	100
	4921			enterolactone sulfate	LC/MS neg	64041		HMDB0240506 HMDB0240505						3.82894	15.43	0.86	0.22	3.9		0.0845	0.8076	0.5718	0.8374	0.0624	0.9998	0.0178	0.7091	0.9066	0.9999	0.0533	0.7632	0.3778	1		0.2847	0.1161	0.4532	0.9536	0.4212	1.0901	1.791	0.3892		29	0	67	38	50	54
	4923			equol	LC/MS neg	36774	C14131	HMDB0002209	91469					0.205799	1	0.11	1	8.72		0.1123	0.8076	0.1123	0.6985	0.1123	0.9998	1	1	0.0262	0.9942	1	1	0.0483	1		0.3863	0.0795	0.6932	0.0795	0.3863	0.0795	0.0795	0.0795		14	0	33	0	17	8
	4933			ferulate	LC/MS neg	35630	C01494	HMDB0000954	445858					5.24729	9.12	1.04	0.1	0.92		0.5058	0.86	0.3544	0.8125	0.2232	0.9998	0.1994	0.9488	0.6747	0.9942	0.0914	0.8655	0.8444	1		1.6078	1.6745	1.5411	8.4734	1.571	8.4366	15.2723	1.6009		100	100	100	100	92	92
	4938			quinate	LC/MS polar	18335	C00296	HMDB0003072	6508					1.34942	0.75	5.5	1.06	0.14		0.302	0.8076	0.5694	0.8374	0.8342	0.9998	0.5656	0.9954	0.365	0.9942	0.7698	0.9938	0.6204	1		5.2043	9.0913	1.3172	7.949	4.2781	7.0228	6.8067	7.2389		100	100	100	100	100	100
	4944			formononetin	LC/MS neg	35657	C00858	HMDB0005808	5280378					5.84738	10.24	1.46	0.14	1		0.0554	0.8076	0.1384	0.717	0.1384	0.9998	0.0241	0.7592	0.7169	0.9976	0.0226	0.6131	1	1		0.2064	0.2064	0.2064	1.1596	0.2538	1.2069	2.1127	0.3011		0	0	0	25	25	38
	4949			galacturonate	LC/MS polar	20758	C08348	HMDB0002545	84740					1.3234	1.34	1.32	4.03	4.08		0.8585	0.9084	0.2229	0.7692	0.2786	0.9998	0.384	0.9767	0.5029	0.9942	0.907	0.9953	0.1479	1		2.1367	0.842	3.4313	0.9834	3.981	2.8277	1.1247	4.5306		71	50	100	75	100	100
	4961			glycyrrhetinate	LC/MS pos late	39789	C02283	HMDB0011628	6857363					1.41782	2.11	0.64	0.27	0.89		0.9855	0.9214	0.0904	0.6985	0.08	0.9998	0.2217	0.9622	0.1879	0.9942	0.0091	0.438	0.9665	1		1.2625	1.3325	1.1925	2.0748	0.9778	1.79	2.817	0.7631		100	100	100	100	100	100
	4963			hesperetin	LC/MS neg	27514	C01709	HMDB0005782	72281					25.1289	65.76	3.96	0.12	1.92		0.243	0.8076	0.7802	0.8572	0.3085	0.9998	0.1393	0.9488	0.9083	0.9999	0.2962	0.9315	0.6317	1		0.4967	0.3403	0.6531	11.3595	1.6187	12.4815	22.3788	2.5843		29	0	67	38	42	46
	4966			homostachydrine*	LC/MS pos early	33009	C08283	HMDB0033433	441447					6.00499	3.5	9.22	2.05	0.78		0.4442	0.839	0.4934	0.8374	0.7821	0.9998	0.734	1	0.4485	0.9942	0.4386	0.9315	0.7929	1		0.9222	1.038	0.8065	2.3374	4.1227	5.5378	3.6368	7.4389		86	75	100	75	83	77
	4970			hypericine	LC/MS polar	62980	C07606	HMDB0034271	5281051					1	1	1	1	1																	1	1	1	1	1	1	1	1		0	0	0	0	8	8
	4971			indolin-2-one	LC/MS pos early	43374	C12312		321710					1.01694	1.63	0.69	0.8	1.89		0.6401	0.8788	0.8767	0.8629	0.9621	0.9998	0.7722	1	0.7071	0.9942	0.8698	0.9938	0.9454	1		1.3929	0.9631	1.8227	1.2686	1.5408	1.4165	1.5741	1.259		100	100	100	100	100	100
	4992			mannonate*	LC/MS polar	62864			3246006					0.912806	0.71	1.05	2.28	1.53		0.6987	0.8894	0.2379	0.7692	0.8071	0.9998	0.6648	1	0.9167	1	0.2506	0.9315	0.5427	1		1.4462	1.1416	1.7507	0.9733	1.793	1.3201	0.8049	1.8353		100	100	100	100	100	100
	5012			naringenin	LC/MS neg	44663	C00509	HMDB0002670	932					1.31136	2.96	0.7	0.64	2.69		0.692	0.8894	0.5125	0.8374	0.1307	0.9998	0.189	0.9488	0.3987	0.9942	0.4662	0.9315	0.1693	1		1.1485	0.6231	1.6739	1.2327	1.4219	1.5061	1.8423	1.1699		57	25	100	63	67	69
	5018			nicotianamine	LC/MS pos early	43026	C05324		9882882					1.52002	3.01	1.01	0.97	2.91		0.4261	0.8361	0.5496	0.8374	0.3333	0.9998	0.2304	0.9643	0.8966	0.9991	0.7587	0.9938	0.3212	1		1.2236	0.6252	1.8221	1.2547	1.8289	1.8599	1.8842	1.8357		100	100	100	100	92	92
	5022			oleanolate	LC/MS neg	38286	C17148	HMDB0002364	10494					2.66213	4.07	1.67	0.58	1.42		0.3136	0.8076	0.5033	0.8374	0.3584	0.9998	0.1912	0.9488	0.9457	1	0.206	0.9315	0.8703	1		1.2194	1.0095	1.4294	2.5608	1.9048	3.2462	4.112	2.3803		86	75	100	88	92	92
	5029			pheophorbide A	LC/MS pos late	35879	C18021		253193					4.61338	5.73	1.5	0.09	0.36		0.0287	0.7678	0.0293	0.5253	0.1318	0.9998	0.0144	0.6867	0.5607	0.9942	0.0054	0.3683	0.6153	1		0.8383	1.2335	0.4431	4.1523	0.5533	3.8674	7.0712	0.6635		57	50	67	75	75	85
	5030			pheophytin A	LC/MS pos late	61857	C05797		135398712					4.77419	5	4.41	0.54	0.61		0.0236	0.7678	0.3295	0.8125	0.1358	0.9998	0.0129	0.6867	0.5073	0.9942	0.0536	0.7632	0.724	1		0.9021	1.1199	0.6843	3.3586	1.8503	4.3068	5.5973	3.0164		100	100	100	100	100	100
	5033			phytanate	LC/MS neg	598	C01607	HMDB0000801	26840					1.4023	7.99	0.23	0.16	5.63		0.7665	0.9011	0.7413	0.8527	0.3238	0.9998	0.6293	1	0.3503	0.9942	0.5888	0.9599	0.4017	1		2.7949	0.8435	4.7464	3.7934	2.9208	3.9193	6.7434	1.0953		86	100	67	88	83	85
	5039			piperine	LC/MS pos late	33935	C03882	HMDB0029377	638024					1.90977	4.8	1.74	6.24	17.2		0.4108	0.8361	0.194	0.7635	0.3179	0.9998	0.2157	0.9609	0.8937	0.9991	0.7963	0.9938	0.1484	1		3.2518	0.3573	6.1462	1.0359	8.426	6.2102	1.7146	10.7059		86	75	100	88	100	100
	5060			ponciretin	LC/MS neg	40448			25201019					9.98174	1.9	18.07	9.53	1		0.4062	0.8361	0.8343	0.8624	0.8343	0.9998	0.6658	1	0.4486	0.9942	0.7354	0.9938	1	1		0.3066	0.3066	0.3066	0.4439	2.9232	3.0604	0.5811	5.5397		0	0	0	25	17	31
	5075			saccharin	LC/MS neg	21151	C12283	HMDB0029723	5143					3.09148	6.56	1.12	0.3	1.76		0.2573	0.8076	0.9747	0.876	0.2427	0.9998	0.1203	0.9488	0.978	1	0.3289	0.9315	0.4634	1		0.6384	0.4627	0.8142	1.749	0.863	1.9736	3.0354	0.9118		57	50	67	50	67	62
	5077			acesulfame	LC/MS polar	48569		HMDB0033585	36573					4.74597	3.69	5.69	1.72	1.12		0.2694	0.8076	0.857	0.8629	0.9972	0.9998	0.4419	0.9908	0.4181	0.9942	0.8863	0.9953	0.9069	1		0.1614	0.1525	0.1703	0.3577	0.5697	0.766	0.5629	0.9691		14	0	33	25	33	38
	5079			secoisolariciresinol	LC/MS neg	38105	C18167	HMDB0013692	65373					2.22147	4.72	0.73	0.26	1.67		0.2198	0.8076	0.4498	0.8374	0.0311	0.9998	0.0236	0.7592	0.4399	0.9942	0.0219	0.606	0.3271	1		0.5942	0.4445	0.7439	1.271	0.6432	1.32	2.0975	0.5426		43	25	67	38	33	31
	5088			sitostanol	LC/MS pos late	52233	C19644	HMDB0000494	241572					0.873643	0.73	1.29	0.6	0.34		0.6919	0.8894	0.073	0.6635	0.4265	0.9998	0.4144	0.9826	0.7676	0.9984	0.3858	0.9315	0.1011	1		1.0407	1.555	0.5264	1.3466	0.6033	0.9092	1.1382	0.6802		100	100	100	88	75	69
	5089			solanidine	LC/MS pos late	39788	C06543	HMDB0003236	65727					1.55756	0.07	10.51	25.56	0.17		0.9496	0.9196	0.4143	0.8374	0.0479	0.9998	0.1726	0.9488	0.1274	0.9942	0.0284	0.6703	0.419	1		1.2942	2.2191	0.3692	1.1855	2.1245	2.0158	0.1518	3.8798		86	75	100	88	100	100
	5097			stachydrine	LC/MS pos early	34384	C10172	HMDB0004827	115244					3.38105	1.39	4.11	8.13	2.74		0.2423	0.8076	0.0797	0.6739	0.4341	0.9998	0.7808	1	0.161	0.9942	0.0461	0.6942	0.5063	1		1.103	0.5895	1.6166	0.703	4.1293	3.7293	0.8165	6.642		100	100	100	100	100	100
	5104			syringaldehyde	LC/MS neg	37449			8655					3.04299	3.31	2.8	0.92	1.09		0.0814	0.8076	0.682	0.8475	0.5419	0.9998	0.1073	0.9488	0.3808	0.9942	0.4125	0.9315	0.8974	1		0.4885	0.4682	0.5087	1.0093	0.9657	1.4865	1.5503	1.4227		14	0	33	50	42	62
	5106			syringic acid	LC/MS neg	37091	C10833	HMDB0002085	10742					9.0905	8.69	9.48	1.13	1.04		0.017	0.7678	0.371	0.823	0.3404	0.9998	0.0234	0.7592	0.2382	0.9942	0.1433	0.9157	0.9689	1		0.3801	0.3733	0.3869	1.8087	2.0267	3.4553	3.2441	3.6664		43	25	67	63	58	69
	5107			tartarate	LC/MS polar	15336	C00552 C00898 C02107	HMDB0062642 HMDB0000956	444305;875					2.17317	1.4	2.77	2.59	1.31		0.6062	0.8754	0.4849	0.8374	0.968	0.9998	0.7432	1	0.6851	0.9942	0.5497	0.954	0.6737	1		0.9407	0.8157	1.0657	0.9778	2.0072	2.0443	1.1399	2.9487		100	100	100	100	100	100
	5116			tribuloside	LC/MS neg	38175	C17140		5320686					1.34682	1.68	1.02	0.61	1		0.2351	0.8076	0.2757	0.7906	0.2757	0.9998	0.124	0.9488	0.94	1	0.0867	0.8566	1	1		0.8771	0.8771	0.8771	1.1745	0.8839	1.1813	1.4719	0.8907		14	25	0	25	8	15
	5119			ursolic acid	LC/MS neg	41654	C08988	HMDB02395	64945					7.50898	57.99	0.81	0.11	7.54		0.1837	0.8076	0.8717	0.8629	0.0172	0.9998	0.0134	0.6867	0.3693	0.9942	0.0366	0.68	0.1323	1		0.6623	0.1551	1.1694	4.5743	1.0611	4.9732	8.9935	0.9528		57	25	100	63	67	69
	5126			hesperidin (hesperetin 7-rutinoside)	LC/MS neg	21300	G00283 D01038	HMDB0003265	10621					1.71302	2.43	1	0.41	1		0.2521	0.8076	0.2521	0.7692	0.2521	0.9998	0.122	0.9488	1	1	0.0727	0.8295	1	1		0.2596	0.2596	0.2596	0.4447	0.2596	0.4447	0.6298	0.2596		0	0	0	13	8	15
	5132			curcumin	LC/MS pos late	37470	C10443	HMDB0002269	969516					7.35836	5.25	251.35	0.41	0.01		0.6296	0.8754	0.229	0.7692	0.8447	0.9998	0.6414	1	0.8338	0.9984	0.2582	0.9315	0.513	1		45.1365	89.4983	0.7747	279.518	97.7494	332.131	469.537	194.724		86	75	100	75	92	85
	5138			harmane	LC/MS pos early	27536	C09209	HMDB0035196	5281404					1.66733	3.1	0.89	0.52	1.83		0.4067	0.8361	0.7526	0.8528	0.2	0.9998	0.152	0.9488	0.7285	0.9976	0.4234	0.9315	0.3073	1		0.9616	0.6799	1.2433	1.3931	1.1718	1.6033	2.1062	1.1004		43	0	100	38	58	54
	5144			diosmetin	LC/MS neg	48367	C10038	HMDB0029676	5281612					1.71493	2.91	0.79	0.35	1.29		0.468	0.8485	0.5306	0.8374	0.1446	0.9998	0.1372	0.9488	0.5725	0.9942	0.0978	0.8708	0.5779	1		0.7335	0.6393	0.8278	1.2492	0.7422	1.2579	1.8592	0.6566		14	0	33	25	17	23
	5151			pyrraline	LC/MS neg	48428	C21013	HMDB0033143	14274616					2.85907	2.28	2.96	7.25	5.59		0.5732	0.8754	0.0978	0.6985	0.8904	0.9998	0.6298	1	0.7552	0.9984	0.2091	0.9315	0.2447	1		2.1607	0.6559	3.6654	1.0763	7.262	6.1776	1.4967	10.8585		86	75	100	88	100	100
	5163			2-keto-3-deoxy-gluconate	LC/MS polar	48141	C00204	HMDB0001353	161227					0.789611	0.95	0.7	1.22	1.66		0.927	0.9087	0.4687	0.8374	0.6635	0.9998	0.8129	1	0.701	0.9942	0.8121	0.9938	0.4617	1		1.2301	0.9246	1.5357	0.8997	1.3018	0.9713	0.8748	1.0679		86	75	100	88	100	100
	5195			steviol	LC/MS neg	54797	C20212	HMDB0036706	313280					12.4991	13.28	6.14	0.06	0.12		0.1824	0.8076	0.1927	0.7635	0.9822	0.9998	0.3448	0.9708	0.3324	0.9942	0.2801	0.9315	0.4074	1		1.5297	2.725	0.3344	19.4552	1.1943	19.1198	36.1853	2.0542		86	100	67	100	83	92
	5198			berberine	LC/MS pos late	38626	C00757	HMDB0003409	2353					2122.49	1	4243.99	4243.99	1		0.5297	0.8664	0.5297	0.8374	0.5297	0.9998	1	1	0.3629	0.9942	0.3143	0.9315	1	1		0.0259	0.0259	0.0259	0.0259	54.9726	54.9726	0.0259	109.919		0	0	0	13	17	23
	5215			4-hydroxycinnamate	LC/MS neg	36770	C00811	HMDB0002035	637542					25.5935	46.45	6.18	0.14	1.07		0.0074	0.7598	0.2035	0.7692	0.1694	0.9998	0.0069	0.6867	0.2528	0.9942	0.04	0.68	0.9436	1		0.2716	0.2619	0.2813	6.2131	1.0097	6.9512	12.1642	1.7381		29	0	67	50	67	77
	5217			isosilibinin	LC/MS neg	57563	C16808	HMDB0033322	3085830					1.44646	1.59	1.3	0.82	1		0.2714	0.8076	0.6945	0.8476	0.6945	0.9998	0.306	0.9708	0.5974	0.9942	0.527	0.9484	1	1		0.297	0.297	0.297	0.3848	0.3418	0.4296	0.4727	0.3865		0	0	0	13	17	23
	5218			silicristin	LC/MS neg	54790	C08717	HMDB0033953	98047133;4481797;49775708;441764					5.18373	5.83	4.53	0.78	1		0.2151	0.8076	0.8911	0.8629	0.8911	0.9998	0.3405	0.9708	0.4136	0.9942	0.8249	0.9938	1	1		0.0664	0.0664	0.0664	0.2269	0.1837	0.3442	0.3874	0.301		0	0	0	13	25	31
	5240			tartronate (hydroxymalonate)	LC/MS neg	20693	C02287	HMDB0035227	45					1.13218	0.74	2.41	0.98	0.3		0.5988	0.8754	0.5495	0.8374	0.4479	0.9998	0.8704	1	0.3522	0.9942	0.8945	0.9953	0.3898	1		0.5379	0.8248	0.2511	0.7194	0.4275	0.609	0.614	0.604		29	50	0	38	33	38
	5243			N-carboxymethylalanine	LC/MS pos early	63155			440119					1.71279	0.62	4.18	2.99	0.44		0.867	0.9084	0.8574	0.8629	0.5196	0.9998	0.7416	1	0.5543	0.9942	0.7054	0.9938	0.6	1		1.3725	1.9014	0.8437	1.5392	2.1841	2.3508	1.177	3.5246		100	100	100	88	92	85
	5248			3-indoleglyoxylic acid	LC/MS neg	63583			73863					1.11153	1.06	1.17	0.86	0.78		0.5454	0.8716	0.3303	0.8125	0.8657	0.9998	0.7632	1	0.5729	0.9942	0.5106	0.9438	0.4652	1		1.2158	1.3638	1.0677	1.4078	1.1593	1.3514	1.4518	1.251		86	100	67	100	92	100
	5252			vanilloylglycine	LC/MS neg	63853		HMDB0060026	3083688					0.900765	0.94	0.87	1.09	1.17		0.6698	0.8872	0.5698	0.8374	0.7218	0.9998	0.9612	1	0.5695	0.9942	0.8624	0.9938	0.5571	1		0.6278	0.5782	0.6774	0.5596	0.6337	0.5655	0.541	0.59		43	25	67	25	50	38
	5261			isoxanthohumol	LC/MS neg	64094		HMDB34048	513197					0.970001	1	0.94	1.12	1.19		0.7349	0.8894	0.2456	0.7692	0.7349	0.9998	1	1	0.6222	0.9942	0.4964	0.9386	0.3387	1		0.6967	0.636	0.7574	0.636	0.7364	0.6758	0.636	0.7155		14	0	33	13	17	15
	5285			2-aminophenol	LC/MS pos early	38109	C01987		5801					1.12631	1.59	0.82	0.79	1.53		0.3512	0.8101	0.5818	0.8374	0.1452	0.9998	0.1062	0.9488	0.6828	0.9942	0.4447	0.9315	0.2015	1		1.0799	0.8521	1.3076	1.105	1.1912	1.2163	1.3579	1.0747		86	75	100	88	100	100
	5286			berberrubine	LC/MS pos early	64510		HMDB0030266	72704					1	1	1	1	1																	1	1	1	1	1	1	1	1		0	0	0	0	8	8
	5332		Bacterial/Fungal	lactobacillic acid	LC/MS neg	63048			656761					1.27118	1.26	1.27	2.01	2		0.8204	0.9084	0.3835	0.8298	0.558	0.9998	0.8038	1	0.5541	0.9942	0.8128	0.9938	0.3558	1		1.5403	1.0275	2.0532	1.1632	2.3352	1.958	1.2989	2.6172		100	100	100	100	92	92
	5353			2-acetamidobutanoate	LC/MS polar	53232			306107					1.06292	0.91	1.33	0.82	0.56		0.8136	0.9084	0.2117	0.7692	0.308	0.9998	0.5841	0.9971	0.3601	0.9942	0.8436	0.9938	0.1537	1		1.0616	1.3572	0.766	1.2971	0.8929	1.1284	1.237	1.0199		100	100	100	100	100	100
	5357			diaminopimelate	LC/MS pos early	15130	C0666 C00680	HMDB0001370	439283					0.339334	0.55	0.24	0.9	2.09		0.0108	0.7678	0.7116	0.8486	0.4375	0.9998	0.1707	0.9488	0.0164	0.9942	0.7385	0.9938	0.4665	1		2.8609	1.8504	3.8713	1.4366	2.395	0.9708	1.0229	0.9186		100	100	100	100	100	100
	5358			glutamyl-meso-diaminopimelate	LC/MS pos early	53163			132279317;45480617					0.625749	1.29	0.32	0.53	2.17		0.2951	0.8076	0.6866	0.8476	0.1988	0.9998	0.8616	1	0.0965	0.9942	0.4632	0.9315	0.2817	1		2.6378	1.6652	3.6105	1.9107	2.3778	1.6506	2.1562	1.145		71	75	67	75	75	77
	5363			N-methylpipecolate	LC/MS pos early	47101			11286529					1.07321	0.69	2.13	1.12	0.36		0.6384	0.8776	0.3338	0.8125	0.7008	0.9998	0.9526	1	0.5349	0.9942	0.6311	0.9747	0.3904	1		1.5586	2.2903	0.8268	1.9353	1.296	1.6727	1.5803	1.7652		100	100	100	100	100	100
	5364			urolithin A	LC/MS neg	57787		HMDB0013695	5488186					1.45036	3.29	1.04	1.41	4.47		0.4291	0.8361	0.8549	0.8629	0.3931	0.9998	0.2628	0.9708	0.9619	1	0.4025	0.9315	0.6656	1		0.6044	0.221	0.9879	0.4742	1.0069	0.8766	0.7273	1.0258		29	25	33	50	50	62
	5369			urolithin C	LC/MS pos early	63667		HMDB0029218	60198001					1.72938	1.8	1.59	0.46	0.53		0.2332	0.8076	0.1962	0.7637	0.8872	0.9998	0.356	0.9708	0.4365	0.9942	0.2449	0.9315	0.4546	1		0.5214	0.6838	0.3591	0.9584	0.4647	0.9017	1.2331	0.5703		14	25	0	38	42	54
	5415		Drug - Analgesics, Anesthetics	4-acetamidophenol	LC/MS neg	12032	C06804	HMDB0001859	1983					0.640254	0.34	1.5	1.54	0.35		0.3414	0.8101	0.3852	0.8298	0.3179	0.9998	0.1859	0.9488	0.9711	1	0.9123	0.9953	0.2387	1		0.6146	0.9121	0.3171	0.6112	0.3969	0.3935	0.3104	0.4767		43	50	33	38	25	23
	5433			desmethylnaproxen	LC/MS neg	46331		HMDB0013989	162920					1.82199	1.53	1.93	3.33	2.64		0.8778	0.9084	0.3903	0.8303	0.7727	0.9998	0.7611	1	0.9214	1	0.6402	0.9775	0.4649	1		0.6011	0.3299	0.8723	0.4178	1.2785	1.0952	0.5057	1.6847		43	25	67	50	58	62
	5435			ibuprofen	LC/MS neg	17799	C01588	HMDB0001925	3672					0.970135	0.94	1	0.94	0.89		0.6532	0.8826	0.1255	0.6985	0.6532	0.9998	0.5381	0.9954	1	1	0.3626	0.9315	0.2054	1		0.8438	0.8949	0.7926	0.8697	0.7926	0.8186	0.8445	0.7926		29	25	33	25	8	8
	5436			2-hydroxyibuprofen	LC/MS neg	43330		HMDB0060920	10443535					1.08068	1.15	1	0.71	0.81		0.7535	0.8961	0.1185	0.6985	0.7535	0.9998	0.6665	1	1	1	0.1309	0.9088	0.4099	1		0.5776	0.6379	0.5172	0.6845	0.5172	0.6242	0.7311	0.5172		29	25	33	25	8	8
	5438			carboxyibuprofen	LC/MS neg	43333		HMDB0060564	10444113					0.273658	0.33	0.07	0.05	0.25		0.2917	0.8076	0.3934	0.8317	0.6486	0.9998	0.6728	1	0.2738	0.9942	0.2941	0.9315	0.7962	1		0.8792	1.4098	0.3486	0.934	0.1858	0.2406	0.4583	0.0229		43	50	33	38	17	15
	5451			celecoxib	LC/MS neg	38599	D00567 C07589	HMDB0005014	2662					1.05593	0.04	26.22	26.22	0.04		0.7364	0.8894	0.7364	0.8527	0.2833	0.9998	0.333	0.9708	0.5835	0.9942	0.5435	0.9523	0.3691	1		0.1341	0.2578	0.0104	0.1341	0.1416	0.1416	0.0104	0.2727		14	25	0	13	17	15
	5458			meloxicam	LC/MS neg	64093	C08169 D00969	HMDB0014952	54677470					1	1	1	1	1																	1	1	1	1	1	1	1	1		0	0	0	0	8	8
	5477			O-desmethyltramadol	LC/MS pos early	53239		HMDB0060997	9838803					0.705549	0.85	0.5	0.4	0.68		0.8645	0.9084	0.1773	0.743	0.3343	0.9998	0.5799	0.9954	0.4068	0.9942	0.0694	0.8295	0.7947	1		0.901	1.0731	0.729	0.9906	0.5461	0.6357	0.9081	0.3632		57	50	67	63	33	38
	5561		Drug - Antibiotic	3-hydroxyquinine	LC/MS pos early	43496	C07344	HMDB0001091	157225					0.103742	0.01	0.4	20.1	0.33		0.02	0.7678	0.4183	0.8374	0.1324	0.9998	0.0112	0.6867	0.4772	0.9942	0.5502	0.954	0.1437	1		0.6815	1.0252	0.3378	0.5159	0.2363	0.0707	0.0067	0.1347		57	75	33	38	33	23
	5562			quinine	LC/MS pos early	39767	C06526	HMDB0014611	3034034					0.957804	0.83	1.11	1.11	0.83		0.6667	0.8862	0.6667	0.8462	0.234	0.9998	0.2665	0.9708	0.5689	0.9942	0.5279	0.9484	0.3023	1		0.7868	0.8579	0.7158	0.7868	0.7536	0.7536	0.7158	0.7913		43	75	0	38	8	8
	5603		Drug - Antiviral	ritonavir	LC/MS neg	63278	D00427	HMDB0014646	392622					1	1	1	1	1																	1	1	1	1	1	1	1	1		0	0	0	0	8	8
	5604			darunavir	LC/MS pos late	63290	D03656	HMDB0015393	213039					556.5	1	1112	1112	1		0.6342	0.8754	0.6342	0.8374	0.6342	0.9998	1	1	0.4897	0.9942	0.4442	0.9315	1	1		0.0002	0.0002	0.0002	0.0002	0.1113	0.1113	0.0002	0.2224		0	0	0	0	17	15
	5607			dolutegravir	LC/MS pos late	63276	D10066		54726191					0.941702	1	0.89	1	1.12		0.1123	0.8076	0.1123	0.6985	0.1123	0.9998	1	1	0.0262	0.9942	1	1	0.0483	1		0.8954	0.8432	0.9477	0.8432	0.8954	0.8432	0.8432	0.8432		14	0	33	0	17	8
	5615			tenofovir	LC/MS pos early	63283	C17407	HMDB0014445	464205					3.75258	1	6.51	6.51	1		0.6342	0.8754	0.6342	0.8374	0.6342	0.9998	1	1	0.4897	0.9942	0.4442	0.9315	1	1		0.0388	0.0388	0.0388	0.0388	0.1456	0.1456	0.0388	0.2524		0	0	0	13	8	15
	5619			lamivudine	LC/MS neg	63284	C07065	HMDB0014847	60825					1	1	1	1	1																	1	1	1	1	1	1	1	1		14	0	33	0	8	0
	5682		Drug - Cardiovascular	metoprolol	LC/MS pos late	18037	D02358	HMDB0001932	4171					3.2049	1	5.41	5.41	1		0.4973	0.8549	0.4973	0.8374	0.4973	0.9998	1	1	0.3263	0.9942	0.2779	0.9315	1	1		0.1469	0.1469	0.1469	0.1469	0.4708	0.4708	0.1469	0.7947		0	0	0	0	25	23
	5683			metoprolol acid metabolite*	LC/MS pos early	34109			62936					20.7302	0.63	54.25	51.28	0.6		0.4022	0.8361	0.4368	0.8374	0.2516	0.9998	0.824	1	0.1546	0.9942	0.1276	0.9088	0.8062	1		0.4073	0.5094	0.3053	0.4162	8.4345	8.4434	0.323	16.5638		43	50	33	38	42	38
	5690			diltiazem	LC/MS pos late	42981	D07845	HMDB0014487	39186					0.0479233	1	0.02	1	40.74		0.1123	0.8076	0.1123	0.6985	0.1123	0.9998	1	1	0.0262	0.9942	1	1	0.0483	1		0.3443	0.0165	0.6722	0.0165	0.3443	0.0165	0.0165	0.0165		14	0	33	0	17	8
	5692			amlodipine	LC/MS pos late	53247	D07450	HMDB0005018	2162					5.16154	1	9.32	9.32	1		0.6342	0.8754	0.6342	0.8374	0.6342	0.9998	1	1	0.4897	0.9942	0.4442	0.9315	1	1		0.026	0.026	0.026	0.026	0.1342	0.1342	0.026	0.2424		0	0	0	13	8	15
	5706			rivaroxaban	LC/MS neg	52958			9875401					0.0557481	1	0.03	1	34.88		0.1123	0.8076	0.1123	0.6985	0.1123	0.9998	1	1	0.0262	0.9942	1	1	0.0483	1		0.3462	0.0193	0.6731	0.0193	0.3462	0.0193	0.0193	0.0193		14	0	33	0	17	8
	5715			furosemide	LC/MS neg	43009	D00331	HMDB0001933	3440					1	1	1	1	1																	1	1	1	1	1	1	1	1		0	0	0	0	8	8
	5736			losartan	LC/MS neg	64102	D08146 C07072	HMDB0014816	3961					685.333	1	1369.67	1369.67	1		0.3469	0.8101	0.3469	0.8125	0.3469	0.9998	1	1	0.1769	0.9942	0.1366	0.9157	1	1		0.0003	0.0003	0.0003	0.0003	0.2056	0.2056	0.0003	0.4109		14	25	0	13	25	23
	5739			olmesartan	LC/MS neg	53256	D05246	HMDB0014420	158781					1	1	1	1	1																	1	1	1	1	1	1	1	1		14	0	33	0	8	0
	5744			lisinopril	LC/MS pos early	54787	DG00336 D00362	HMDB0001938	5362119					581.168	1049.87	1.71	0	0.81		0.2356	0.8076	0.3	0.8055	0.3857	0.9998	0.1637	0.9488	0.8071	0.9984	0.132	0.912	0.9106	1		0.3085	0.3411	0.2758	179.225	0.3736	179.29	358.11	0.4713		29	50	0	38	17	23
	5792		Drug - Gastrointestinal	emodin	LC/MS neg	39941	C10343	HMDB0035214	3220					7.38596	1	13.77	13.77	1		0.6342	0.8754	0.6342	0.8374	0.6342	0.9998	1	1	0.4897	0.9942	0.4442	0.9315	1	1		0.0171	0.0171	0.0171	0.0171	0.1263	0.1263	0.0171	0.2355		14	0	33	0	17	8
	5795		Drug - Metabolic	metformin	LC/MS pos early	38306	C07151	HMDB0001921	4091					622.115	12.65	858.04	175.12	2.58		0.2484	0.8076	0.8845	0.8629	0.8229	0.9998	0.3419	0.9708	0.4896	0.9942	0.9492	1	0.8144	1		0.7738	0.432	1.1157	2.9493	479.217	481.392	5.4667	957.318		57	50	67	63	92	92
	5818			atorvastatin	LC/MS neg	38619	D07474 D00887 D02258	HMDB0005006	60822					63.6	1	126.2	126.2	1		0.4776	0.8485	0.4776	0.8374	0.4776	0.9998	1	1	0.3049	0.9942	0.2568	0.9315	1	1		0.0045	0.0045	0.0045	0.0045	0.2862	0.2862	0.0045	0.5679		0	0	0	13	17	23
	5821			o-hydroxyatorvastatin	LC/MS neg	47883			9808225					42.2292	1	83.46	83.46	1		0.4758	0.8485	0.4758	0.8374	0.4758	0.9998	1	1	0.3029	0.9942	0.2549	0.9315	1	1		0.0048	0.0048	0.0048	0.0048	0.2027	0.2027	0.0048	0.4006		0	0	0	13	17	23
	5822			o-hydroxyatorvastatin lactone	LC/MS pos late	47879			10650434					1.17998	1	1.36	1.36	1		0.6342	0.8754	0.6342	0.8374	0.6342	0.9998	1	1	0.4897	0.9942	0.4442	0.9315	1	1		0.3817	0.3817	0.3817	0.3817	0.4504	0.4504	0.3817	0.5191		0	0	0	0	17	15
	5823			p-hydroxyatorvastatin lactone	LC/MS pos late	47880			9937602					1.03726	1	1.07	1.07	1		0.6342	0.8754	0.6342	0.8374	0.6342	0.9998	1	1	0.4897	0.9942	0.4442	0.9315	1	1		0.7487	0.7487	0.7487	0.7487	0.7766	0.7766	0.7487	0.8045		0	0	0	0	17	15
	5824			p-hydroxyatorvastatin	LC/MS neg	47881			9851106					173.4	1	345.9	345.9	1		0.4747	0.8485	0.4747	0.8374	0.4747	0.9998	1	1	0.3017	0.9942	0.2537	0.9315	1	1		0.001	0.001	0.001	0.001	0.1734	0.1734	0.001	0.3459		0	0	0	13	17	23
	5835			fenofibrate	LC/MS pos late	27554	C07586	HMDB0015173	3339					1	1	1	1	1																	1	1	1	1	1	1	1	1		0	0	0	0	8	8
	5847			silibinin	LC/MS neg	54791	C07610 D08515	HMDB0030583	31553					199.681	231.15	166.85	0.69	0.96		0.2213	0.8076	0.8791	0.8629	0.9098	0.9998	0.3544	0.9708	0.4112	0.9942	0.8301	0.9938	0.9803	1		0.0047	0.0048	0.0046	0.5571	0.3861	0.9385	1.1095	0.7675		14	25	0	38	17	31
	5856		Drug - Neurological	5-hydroxyvalproate	LC/MS neg	61832	C16650	HMDB0013898	135244					0.851746	0.19	4.24	4.24	0.19		0.7358	0.8894	0.7358	0.8527	0.2831	0.9998	0.3326	0.9708	0.5837	0.9942	0.5437	0.9523	0.3687	1		0.1747	0.2926	0.0568	0.1747	0.1488	0.1488	0.0568	0.2407		14	25	0	13	17	15
	5860			3-hydroxyisonicotinic acid	LC/MS polar	63163			459503					0.89847	3.05	0.4	0.56	4.3		0.6119	0.8754	0.8953	0.8629	0.1226	0.9998	0.1594	0.9488	0.4292	0.9942	0.2438	0.9315	0.2783	1		1.5946	0.6018	2.5873	1.2201	1.8072	1.4327	1.8384	1.027		86	75	100	88	92	92
	5870			gabapentin	LC/MS neg	38686	D00332	HMDB0005015	3446					1	1	1	1	1																	1	1	1	1	1	1	1	1		0	0	0	0	8	8
	5876			baclofen	LC/MS pos early	57646	D00241	HMDB0014327	2284					0.376841	0.12	2.48	2.48	0.12		0.254	0.8076	0.254	0.7692	0.0845	0.9998	0.0543	0.9488	0.6392	0.9942	0.6033	0.9613	0.0725	1		0.3394	0.6051	0.0736	0.3394	0.1279	0.1279	0.0736	0.1822		29	50	0	25	17	15
	5883			riluzole	LC/MS pos late	12380	C07937	HMDB0014878	5070					1.01808	1.06	0.98	1.16	1.25		0.9767	0.9214	0.713	0.8486	0.9535	0.9998	0.952	1	0.983	1	0.8021	0.9938	0.7861	1		0.8075	0.7172	0.8977	0.7388	0.8908	0.8221	0.7603	0.884		71	50	100	50	67	54
	5896			geranyllinalool	LC/MS pos late	63123	C20681		5365872					1.1578	0.63	1.7	2.66	0.98		0.8552	0.9084	0.4658	0.8374	0.4445	0.9998	0.6863	1	0.49	0.9942	0.2335	0.9315	0.9816	1		1.1806	1.1898	1.1715	0.9681	1.5795	1.3669	0.7464	1.9875		43	50	33	63	75	85
	5903		Drug - Psychoactive	sertraline	LC/MS pos late	39757	C07246	HMDB0005010	68617					7.57067	1	7.71	364.36	47.26		0.9655	0.9214	0.1931	0.7635	0.9655	0.9998	1	1	0.9497	1	0.3036	0.9315	0.3854	1		0.0941	0.0039	0.1843	0.0039	0.8026	0.7124	0.0039	1.421		14	0	33	13	25	23
	5929			trazodone	LC/MS pos early	57691	C07156 D08626	HMDB0014794	5533					0.0633824	0.16	0.04	1	3.93		0.0051	0.7598	0.122	0.6985	0.122	0.9998	0.2861	0.9708	0.0027	0.9942	1	1	0.0542	1		0.68	0.2759	1.084	0.1595	0.5636	0.0431	0.0431	0.0431		43	25	67	25	17	8
	5941			THC carboxylic acid	LC/MS neg	61836			107885					1.53437	0.21	7.75	7.75	0.21		0.8369	0.9084	0.8369	0.8624	0.3158	0.9998	0.4049	0.9826	0.5554	0.9942	0.5135	0.9447	0.44	1		0.1804	0.2975	0.0633	0.1804	0.2768	0.2768	0.0633	0.4903		14	25	0	13	17	15
	5975		Drug - Respiratory	cetirizine	LC/MS pos late	54745	C07778	HMDB0005032	2678					1.01676	1.03	1	0.97	1		0.2521	0.8076	0.2521	0.7692	0.2521	0.9998	0.122	0.9488	1	1	0.0727	0.8295	1	1		0.937	0.937	0.937	0.9527	0.937	0.9527	0.9685	0.937		0	0	0	13	8	15
	5980			loratadine	LC/MS pos late	38643	D00364	HMDB0005000	3957					0.844501	0.73	1	1	0.73		0.2544	0.8076	0.2544	0.7692	0.2499	0.9998	0.122	0.9488	0.9933	1	0.9926	1	0.1501	1		1.173	1.3559	0.99	1.173	0.9906	0.9906	0.99	0.9912		29	25	33	13	17	8
	5988			dextromethorphan	LC/MS pos late	38301	D03744 DG01078 C06947	HMDB0001920	5360696					0.496935	0.26	1.43	1.43	0.26		0.3925	0.8361	0.3925	0.8317	0.167	0.9998	0.1295	0.9488	0.6839	0.9942	0.6517	0.9803	0.1583	1		0.7667	1.2203	0.3131	0.7667	0.381	0.381	0.3131	0.4489		43	75	0	38	8	8
	6000		Drug - Topical Agents	salicylate	LC/MS polar	1515	C00805	HMDB0001895	338					0.994936	16.01	0.07	0.07	16.2		0.9046	0.9084	0.9793	0.8763	0.1012	0.9998	0.2829	0.9708	0.1939	0.9942	0.1851	0.9315	0.278	1		8.9261	1.0377	16.8146	8.8269	8.9801	8.8809	16.6162	1.1455		100	100	100	100	100	100
	6002			2,6-dihydroxybenzoic acid	LC/MS polar	63042		HMDB0013676	9338					0.975772	1.23	0.87	1.64	2.33		0.734	0.8894	0.5808	0.8374	0.5291	0.9998	0.5064	0.9912	0.831	0.9984	0.9494	1	0.4537	1		1.4776	0.8869	2.0684	0.9903	1.9292	1.4418	1.0937	1.79		71	50	100	75	100	100
	6009		Drug - Other	mirabegron	LC/MS pos early	57670	D09535		9865528					1	1	1	1	1																	1	1	1	1	1	1	1	1		0	0	0	0	8	8
	6013			N-carbamoylglutamate	LC/MS pos early	38749	C05829	HMDB0062795	3679006					0.938611	1.03	0.86	1.02	1.22		0.4907	0.8549	0.6204	0.8374	0.7194	0.9998	0.8184	1	0.4464	0.9942	0.9117	0.9953	0.5873	1		1.0409	0.9392	1.1427	0.9527	1.0652	0.977	0.9663	0.9877		100	100	100	88	83	77
	6029			S-carboxymethyl-cysteine	LC/MS pos early	47897	C03727	HMDB0029415	193653					1.64894	1.07	2.23	2.09	1		0.46	0.8452	0.5938	0.8374	0.5938	0.9998	0.8856	1	0.357	0.9942	0.3918	0.9315	1	1		0.5378	0.5378	0.5378	0.5558	0.8689	0.8868	0.5738	1.1999		14	25	0	25	17	23
	6041			pterostilbene	LC/MS neg	40681	C10287	HMDB0130987	5281727					1.0992	1	1.2	1.2	1		0.6342	0.8754	0.6342	0.8374	0.6342	0.9998	1	1	0.4897	0.9942	0.4442	0.9315	1	1		0.5282	0.5282	0.5282	0.5282	0.5806	0.5806	0.5282	0.633		0	0	0	0	17	15
	6089		Chemical	diethanolamine	LC/MS pos early	20691	C06772	HMDB0004437	8113					1.10404	0.68	1.6	2.04	0.87		0.9678	0.9214	0.2294	0.7692	0.043	0.9998	0.1434	0.9488	0.1354	0.9942	0.0132	0.5241	0.5545	1		0.9689	1.0373	0.9005	0.8701	1.1685	1.0697	0.7029	1.4365		100	100	100	100	100	100
	6119			diglycerol	LC/MS pos early	40700			42953					0.146228	0.09	1.75	0.7	0.04		0.2843	0.8076	0.0036	0.4006	0.0248	0.9998	0.0255	0.7592	0.3332	0.9942	0.4627	0.9315	0.0018	0.7221		6.84	13.2106	0.4693	7.1939	0.6463	1.0002	1.1772	0.8233		100	100	100	100	100	100
	6128			sulfate*	LC/MS neg	46960	C00059	HMDB01448	5152822					0.544626	0.18	0.99	4.42	0.81		0.0568	0.8076	0.3309	0.8125	0.1839	0.9998	0.031	0.8068	0.635	0.9942	0.071	0.8295	0.809	1		2.1064	2.3217	1.8911	1.3724	1.8812	1.1472	0.4231	1.8713		100	100	100	100	100	100
	6131			O-sulfo-tyrosine	LC/MS neg	45413		HMDB0155722	514186					0.917063	1.27	0.66	0.72	1.39		0.8892	0.9084	0.848	0.8629	0.5065	0.9998	0.7165	1	0.5579	0.9942	0.4898	0.9385	0.7617	1		0.9031	0.7554	1.0507	0.8589	0.8724	0.8282	0.9624	0.6941		71	50	100	50	58	46
	6188			brilliant blue FCF (blue 1)	LC/MS neg	43434	C19352		19700					0.672303	1.44	0.39	0.74	2.71		0.7144	0.8894	0.62	0.8374	0.4643	0.9998	0.7988	1	0.4254	0.9942	0.8461	0.9938	0.4361	1		0.8575	0.4627	1.2523	0.5634	0.8706	0.5765	0.6641	0.4889		29	25	33	25	42	38
	6196			ectoine	LC/MS pos early	35651	C06231	HMDB0240650	126041					1.76703	0.92	4.12	1.62	0.36		0.0541	0.8076	0.4801	0.8374	0.1549	0.9998	0.6925	1	0.0192	0.9942	0.5424	0.9523	0.1778	1		0.6005	0.8827	0.3184	0.8463	0.8153	1.0611	0.8099	1.3122		57	75	33	88	83	100
	6246			triethanolamine	LC/MS pos early	22202	C06771	HMDB0032538	7618					0.877055	0.53	1.37	1.82	0.7		0.4901	0.8549	0.6261	0.8374	0.1412	0.9998	0.1409	0.9488	0.5482	0.9942	0.1177	0.8928	0.5132	1		1.0647	1.2494	0.8801	0.9554	1.0431	0.9338	0.6614	1.2061		100	100	100	88	83	77
	6249			diethyl phosphate	LC/MS neg	64496	C06608	HMDB0012209	654					2.05056	2.7	1.34	0.45	0.91		0.0117	0.7678	0.0256	0.525	0.0598	0.9998	0.0041	0.6867	0.5583	0.9942	0.0023	0.3397	0.7851	1		0.4846	0.5071	0.4621	0.9385	0.5397	0.9937	1.37	0.6173		14	25	0	63	17	46
	6280			4-acetamidobenzoate	LC/MS neg	57585	D03836		6918889					1.20861	1.28	1.13	0.89	1		0.096	0.8076	0.5759	0.8374	0.5759	0.9998	0.1274	0.9488	0.3956	0.9942	0.3694	0.9315	1	1		0.8087	0.8087	0.8087	0.9229	0.8633	0.9774	1.037	0.9178		14	25	0	38	33	46
	6281			thioproline	LC/MS pos early	53231		HMDB0062164	93176					0.552728	0.4	0.72	1.6	0.89		0.2439	0.8076	0.5357	0.8374	0.8295	0.9998	0.3408	0.9708	0.4805	0.9942	0.5008	0.9409	0.7956	1		1.2024	1.2751	1.1297	0.8933	0.9737	0.6646	0.5115	0.8176		71	75	67	50	58	46
	6290			2-iminopiperidine	LC/MS pos early	63043			85237					1.10843	0.86	1.45	1.19	0.71		0.4762	0.8485	0.7396	0.8527	0.2053	0.9998	0.6901	1	0.1546	0.9942	0.4387	0.9315	0.307	1		0.8937	1.0449	0.7424	0.9739	0.9103	0.9906	0.903	1.0783		57	50	67	75	83	92
	6465	Partially Characterized Molecules	Partially Characterized Molecules	pentose acid*	LC/MS polar	63264	C00803	HMDB0000892	7991					3.55591	4.79	2.17	0.4	0.89		0.1665	0.8076	0.6329	0.8374	0.7144	0.9998	0.2285	0.9643	0.4439	0.9942	0.497	0.9386	0.9429	1		0.8568	0.9057	0.808	2.6228	1.2807	3.0467	4.34	1.7534		100	100	100	100	100	100
	6472			branched-chain, straight-chain, or cyclopropyl 10:1 fatty acid (1)*	LC/MS neg	63615								3.44313	1.89	5.17	2.46	0.9		0.3139	0.8076	0.9992	0.8793	0.8352	0.9998	0.5771	0.9954	0.3753	0.9942	0.8671	0.9938	0.8941	1		0.7016	0.7396	0.6636	1.0688	2.0486	2.4157	1.398	3.4335		43	50	33	50	58	62
	6485			bilirubin degradation product, C16H18N2O5 (1)**	LC/MS neg	64403								0.526276	0.41	0.66	1.37	0.85		0.2994	0.8076	0.4767	0.8374	0.7959	0.9998	0.3724	0.9745	0.5634	0.9942	0.4343	0.9315	0.7708	1		1.842	1.9891	1.6948	1.4034	1.408	0.9694	0.8177	1.1212		100	100	100	100	100	100
	6486			bilirubin degradation product, C16H18N2O5 (2)**	LC/MS neg	64404								0.349477	0.25	0.44	1.92	1.08		0.0755	0.8076	0.3751	0.8276	0.8064	0.9998	0.159	0.9488	0.2463	0.9942	0.3616	0.9315	0.6787	1		1.7881	1.7169	1.8593	1.0726	1.3404	0.6249	0.4283	0.8215		57	50	67	63	58	62
	6488			bilirubin degradation product, C17H18N2O4 (2)**	LC/MS neg	64407								0.118115	0.03	0.29	4.05	0.49		0.0147	0.7678	0.1943	0.7635	0.8175	0.9998	0.0581	0.9488	0.0871	0.9942	0.217	0.9315	0.4863	1		6.9585	9.3369	4.58	4.8312	2.9492	0.8219	0.3255	1.3184		100	100	100	75	83	69
	6489			bilirubin degradation product, C17H18N2O4 (3)**	LC/MS neg	64408								0.0780693	0.02	0.28	3.86	0.28		0.0476	0.8076	0.2788	0.7906	0.8669	0.9998	0.1934	0.9488	0.1108	0.9942	0.4532	0.9315	0.4234	1		6.9054	10.7791	3.0317	5.5004	1.9441	0.5391	0.2217	0.8566		86	75	100	50	58	38
	6492			bilirubin degradation product, C16H18N2O5 (3)**	LC/MS neg	64414								0.577869	0.99	0.43	1.21	2.79		0.2724	0.8076	0.1646	0.7336	0.4856	0.9998	0.7751	1	0.1962	0.9942	0.5566	0.9547	0.1863	1		1.5282	0.807	2.2495	0.8023	1.609	0.8831	0.7976	0.9686		86	75	100	63	83	69
	6494			2-amino-4-cyanobutanoate	LC/MS pos early	46225								1.07053	0.89	1.35	1	0.66		0.6671	0.8862	0.3944	0.8317	0.3344	0.9998	0.7069	1	0.3116	0.9942	0.9239	0.9953	0.2514	1		0.9358	1.1286	0.743	1.0655	0.8721	1.0018	1.0024	1.0012		100	100	100	100	100	100
		N/A	N/A	X-10457	LC/MS pos early	47581								1.14208	1.15	1.14	1.18	1.19		0.8915	0.9084	0.593	0.8374	0.8143	0.9998	0.7987	1	0.9427	1	0.8073	0.9938	0.6246	1		0.8277	0.7542	0.9012	0.8101	0.9629	0.9453	0.866	1.0246		86	75	100	63	75	62
				X-11308	LC/MS neg	46390								1.20193	1.42	1.02	0.9	1.25		0.7447	0.894	0.6915	0.8476	0.5263	0.9998	0.5107	0.9912	0.8205	0.9984	0.8463	0.9938	0.5129	1		0.8706	0.7732	0.9679	0.9375	0.9795	1.0464	1.1018	0.991		100	100	100	88	92	85
				X-11381	LC/MS neg	46347								0.859912	0.51	1.47	1.66	0.58		0.4974	0.8549	0.7802	0.8572	0.0753	0.9998	0.0934	0.9488	0.3918	0.9942	0.2092	0.9315	0.1834	1		1.0215	1.2969	0.746	0.9789	0.921	0.8784	0.6609	1.096		100	100	100	100	92	92
				X-11612	LC/MS neg	47431								0.609821	0.53	0.72	0.97	0.71		0.0556	0.8076	0.9051	0.8629	0.6562	0.9998	0.1029	0.9488	0.2577	0.9942	0.6484	0.9784	0.8351	1		2.1321	2.4931	1.7711	1.9073	1.525	1.3002	1.3214	1.279		100	100	100	88	100	92
				X-11615	LC/MS neg	32932								0.933425	0.6	1.67	1.23	0.44		0.7429	0.8932	0.2537	0.7692	0.3886	0.9998	0.4141	0.9826	0.6924	0.9942	0.8129	0.9938	0.2063	1		0.8712	1.2063	0.5362	0.9675	0.717	0.8132	0.7286	0.8978		71	75	67	75	50	54
				X-11787	LC/MS pos early	33132								0.701799	0.73	0.68	1.2	1.29		0.3207	0.8076	0.5915	0.8374	0.8851	0.9998	0.5548	0.9954	0.4057	0.9942	0.7501	0.9938	0.6645	1		0.7059	0.6169	0.795	0.5332	0.6681	0.4954	0.4496	0.5412		57	50	67	50	50	46
				X-12015	LC/MS neg	47390								0.541612	0.18	1.29	3.46	0.48		0.077	0.8076	0.773	0.8572	0.4571	0.9998	0.0871	0.9488	0.4231	0.9942	0.7097	0.9938	0.5115	1		1.1331	1.5281	0.7381	0.9016	0.8452	0.6137	0.2752	0.9522		71	75	67	50	42	31
				X-12026	LC/MS neg	47905								1.25994	1.73	0.93	0.75	1.4		0.5305	0.8664	0.9028	0.8629	0.4479	0.9998	0.3439	0.9708	0.9218	1	0.6042	0.9613	0.574	1		0.7094	0.5909	0.8278	0.8063	0.7969	0.8938	1.0216	0.766		29	25	33	50	50	62
				X-12096	LC/MS pos early	47686								2.61077	1.32	4.43	2.39	0.71		0.9872	0.9214	0.5744	0.8374	0.263	0.9998	0.4433	0.9908	0.4038	0.9942	0.1801	0.9315	0.7138	1		1.0292	1.2023	0.856	1.3933	2.3229	2.687	1.5843	3.7897		100	100	100	100	100	100
				X-12100	LC/MS pos early	47687								1.31911	1.41	1.2	0.64	0.76		0.1992	0.8076	0.0683	0.656	0.6311	0.9998	0.2269	0.9643	0.5445	0.9942	0.0656	0.8207	0.365	1		0.9702	1.1042	0.8362	1.3309	0.9191	1.2798	1.5576	1.0021		100	100	100	100	100	100
				X-12101	LC/MS pos early	47642								1.6366	1.35	2.01	1.14	0.76		0.8993	0.9084	0.8213	0.8616	0.5236	0.9998	0.7237	1	0.5773	0.9942	0.7371	0.9938	0.5826	1		0.8814	1.0005	0.7624	1.1756	1.1483	1.4425	1.3508	1.5342		86	100	67	88	92	92
				X-12117	LC/MS pos early	47695								1.56492	0.98	2.88	1.32	0.45		0.9002	0.9084	0.6374	0.8374	0.484	0.9998	0.6909	1	0.5471	0.9942	0.851	0.9938	0.4574	1		0.8341	1.1509	0.5173	1.1371	1.0023	1.3053	1.1232	1.4874		100	100	100	75	83	69
				X-12125	LC/MS pos early	47643								1.33845	1	1.68	1.68	1		0.4176	0.8361	0.4176	0.8374	0.4176	0.9998	1	1	0.2427	0.9942	0.1972	0.9315	1	1		0.4234	0.4234	0.4234	0.4234	0.5667	0.5667	0.4234	0.7101		0	0	0	13	25	31
				X-12127	LC/MS pos early	47702								2.02153	0.89	4.14	2.48	0.53		0.6928	0.8894	0.7349	0.8527	0.6123	0.9998	0.9381	1	0.5124	0.9942	0.8909	0.9953	0.5912	1		0.3901	0.509	0.2713	0.4812	0.6975	0.7886	0.4535	1.1238		14	25	0	25	25	31
				X-12193	LC/MS neg	46985								1.80794	1.86	1.75	0.76	0.8		0.0507	0.8076	0.3112	0.8082	0.8706	0.9998	0.137	0.9488	0.1749	0.9942	0.3419	0.9315	0.5832	1		0.4733	0.5245	0.4221	0.7493	0.5798	0.8557	0.974	0.7375		29	50	0	63	42	62
				X-12199	LC/MS pos early	47706								1.17306	0.44	3.12	2.66	0.38		0.5354	0.8667	0.5407	0.8374	0.3414	0.9998	0.8145	1	0.2567	0.9942	0.2126	0.9315	0.824	1		0.9066	1.3177	0.4956	0.9493	1.0208	1.0635	0.5809	1.546		43	25	67	50	83	85
				X-12456	LC/MS neg	47639								0.429541	0.23	0.62	2.79	1.03		0.1532	0.8076	0.3978	0.8334	0.8312	0.9998	0.2555	0.9708	0.3637	0.9942	0.3931	0.9315	0.6838	1		1.2965	1.2749	1.318	0.7843	1.069	0.5569	0.2937	0.82		71	50	100	50	67	54
				X-12462	LC/MS pos early	46620								1.57268	1.79	1.28	0.55	0.76		0.2297	0.8076	0.1149	0.6985	0.556	0.9998	0.2217	0.9622	0.6433	0.9942	0.0853	0.8515	0.5074	1		0.9665	1.0973	0.8357	1.5319	0.9546	1.52	1.9664	1.0735		100	100	100	100	100	100
				X-12680	LC/MS pos early	47437								2.45264	0.95	7.57	2.33	0.29		0.6799	0.8894	0.953	0.8677	0.3119	0.9998	0.6738	1	0.3016	0.9942	0.4377	0.9315	0.4925	1		1.5668	2.4227	0.7109	2.3642	3.0454	3.8428	2.3056	5.3799		100	100	100	100	92	92
				X-12689	LC/MS pos early	47719								2.17669	2.24	2.1	0.76	0.81		0.1218	0.8076	0.5365	0.8374	0.9179	0.9998	0.2497	0.9708	0.2816	0.9942	0.5598	0.9559	0.7417	1		0.5801	0.642	0.5182	1.0386	0.8042	1.2627	1.4353	1.0902		57	50	67	63	67	69
				X-12798	LC/MS pos early	46624								1.18508	0.83	2.18	0.92	0.35		0.7243	0.8894	0.1365	0.7149	0.3691	0.9998	0.7028	1	0.3635	0.9942	0.6098	0.9635	0.1324	1		0.6986	1.0326	0.3645	0.9464	0.58	0.8279	0.8602	0.7955		57	100	0	88	25	46
				X-12823	LC/MS neg	47946								1	1	1	1	1																	1	1	1	1	1	1	1	1		0	0	0	0	8	8
				X-12828	LC/MS neg	47947								5.14718	1.86	8.47	4.49	0.99		0.2571	0.8076	0.6358	0.8374	0.6201	0.9998	0.6515	1	0.2383	0.9942	0.4359	0.9315	0.9886	1		0.248	0.2496	0.2464	0.3574	1.1671	1.2765	0.4652	2.0878		14	25	0	38	25	38
				X-12906	LC/MS neg	47955								2.31591	2.75	1.74	0.48	0.75		0.2109	0.8076	0.5368	0.8374	0.7657	0.9998	0.2859	0.9708	0.4765	0.9942	0.4609	0.9315	0.8373	1		0.4916	0.5609	0.4222	1.0508	0.5793	1.1385	1.5407	0.7364		29	25	33	50	58	69
				X-13007	LC/MS neg	47203								3.7833	3.77	3.79	1.25	1.24		0.118	0.8076	0.6339	0.8374	0.6934	0.9998	0.4029	0.9826	0.1539	0.9942	0.4836	0.9385	0.958	1		0.8071	0.7203	0.894	1.7192	2.1415	3.0535	2.7181	3.3889		86	75	100	88	100	100
				X-13431	LC/MS pos late	47788								3.91677	1.58	6.2	4.03	1.03		0.5319	0.8664	0.8876	0.8629	0.9349	0.9998	0.7075	1	0.6059	0.9942	0.8569	0.9938	0.9698	1		0.8543	0.8432	0.8654	1.087	3.1134	3.3461	1.3307	5.3614		43	25	67	25	33	23
				X-13507	LC/MS pos early	47439								1.01509	0.46	4.33	1.58	0.17		0.617	0.8754	0.4351	0.8374	0.1128	0.9998	0.434	0.9897	0.1303	0.9942	0.4883	0.9385	0.1344	1		1.9876	3.4041	0.5711	2.4841	1.5211	2.0176	1.564	2.4712		100	100	100	100	100	100
				X-13553	LC/MS neg	47959								0.00860169	0	0.6	0.86	0.01		0.0322	0.8076	0.076	0.6635	0.1217	0.9998	0.0147	0.6867	0.6114	0.9942	0.8345	0.9938	0.0391	1		107.653	213.872	1.4351	107.432	1.147	0.926	0.993	0.8589		86	100	67	88	67	69
				X-13696	LC/MS pos late	47791								1.05995	1	1.08	3.86	3.58		0.6852	0.8894	0.2275	0.7692	0.6852	0.9998	1	1	0.5557	0.9942	0.5056	0.9438	0.3043	1		0.2619	0.1143	0.4096	0.1143	0.4252	0.2776	0.1143	0.4409		14	0	33	13	17	15
				X-13723	LC/MS neg	47965								1.89186	1.74	2.13	0.79	0.64		0.3592	0.8147	0.4612	0.8374	0.9563	0.9998	0.5019	0.9912	0.5265	0.9942	0.5214	0.9484	0.6623	1		0.8637	1.0507	0.6767	1.4391	1.0586	1.634	1.8275	1.4405		100	100	100	100	83	85
				X-13728	LC/MS neg	46645								1.13087	0.81	1.45	1.82	1.02		0.69	0.8894	0.5145	0.8374	0.4697	0.9998	0.8212	1	0.4156	0.9942	0.2719	0.9315	0.963	1		0.8283	0.8203	0.8363	0.7419	1.0231	0.9367	0.6635	1.2098		71	75	67	88	92	100
				X-13729	LC/MS neg	47971								1.2815	0.74	2.47	1.53	0.46		0.5563	0.8754	0.5375	0.8374	0.1536	0.9998	0.5463	0.9954	0.1456	0.9942	0.4929	0.9385	0.1946	1		0.7357	1.0102	0.4612	0.8782	0.8003	0.9428	0.7462	1.1393		57	75	33	63	67	69
				X-13838	LC/MS neg	47974								1.49691	0.97	2.24	1.61	0.7		0.6904	0.8894	0.9851	0.8766	0.5621	0.9998	0.8997	1	0.4777	0.9942	0.6493	0.9784	0.7027	1		0.7766	0.9135	0.6397	0.9019	1.0373	1.1625	0.8903	1.4348		100	100	100	100	100	100
				X-13844	LC/MS neg	47977								15.2793	18.2	2.6	0.03	0.23		0.2362	0.8076	0.1155	0.6985	0.6106	0.9998	0.2466	0.9708	0.6111	0.9942	0.0965	0.8655	0.4769	1		0.3877	0.6303	0.1451	6.0504	0.2611	5.9238	11.4705	0.3772		29	50	0	50	33	46
				X-13866	LC/MS neg	46417								1.80811	1.84	1.77	0.74	0.77		0.7893	0.9063	0.6	0.8374	0.9407	0.9998	0.8945	1	0.8034	0.9984	0.7152	0.9938	0.7028	1		0.8604	0.9743	0.7465	1.3822	1.0338	1.5557	1.7901	1.3212		86	75	100	63	58	46
				X-14056	LC/MS pos early	46632								0.353863	0.24	1.01	0.7	0.17		0.2687	0.8076	0.1358	0.7149	0.2901	0.9998	0.1433	0.9488	0.9703	1	0.7049	0.9938	0.1093	1		3.4892	5.9695	1.009	3.7091	1.0149	1.2347	1.4487	1.0208		100	100	100	100	100	100
				X-14254	LC/MS neg	47223								0.72572	0.61	0.82	1.7	1.26		0.2641	0.8076	0.3726	0.825	0.3808	0.9998	0.1763	0.9488	0.8543	0.9984	0.1608	0.9157	0.992	1		1.2531	1.1092	1.397	0.891	1.2715	0.9094	0.6728	1.146		100	100	100	100	100	100
				X-14263	LC/MS neg	47224								1.108	1.14	1.07	0.77	0.82		0.5602	0.8754	0.2318	0.7692	0.7449	0.9998	0.8584	1	0.5093	0.9942	0.4716	0.9315	0.3315	1		1.0222	1.1247	0.9197	1.2009	0.9539	1.1326	1.277	0.9882		100	100	100	100	100	100
				X-14383	LC/MS neg	47230								0.643443	0.41	0.87	2.19	1.04		0.0816	0.8076	0.0501	0.5908	0.129	0.9998	0.0303	0.8034	0.8534	0.9984	0.0083	0.4184	0.7459	1		1.4267	1.3995	1.4539	0.9879	1.3567	0.918	0.5764	1.2595		100	100	100	100	100	100
				X-14392	LC/MS neg	47233								0.737514	0.65	0.78	2.37	1.95		0.3237	0.8076	0.0134	0.4844	0.3554	0.9998	0.1946	0.9488	0.9618	1	0.0082	0.4184	0.2621	1		1.1833	0.8009	1.5657	0.6593	1.3967	0.8727	0.5177	1.2276		100	100	100	100	100	100
				X-14416	LC/MS neg	47237								0.683033	0.84	0.64	2.65	3.51		0.5548	0.8754	0.0022	0.4006	0.7139	0.9998	0.8764	1	0.4869	0.9942	0.0179	0.5635	0.0214	1		0.943	0.4184	1.4677	0.3855	1.2017	0.6441	0.3526	0.9357		57	25	100	25	100	77
				X-14454	LC/MS neg	47239								0.656647	0.35	0.9	3.22	1.27		0.1251	0.8076	0.0152	0.5034	0.1273	0.9998	0.0414	0.9488	0.9942	1	0.003	0.364	0.4899	1		1.384	1.22	1.5479	0.8252	1.4675	0.9088	0.4305	1.3871		100	100	100	100	100	100
				X-14502	LC/MS neg	47247								2.4466	1.33	3.01	4.48	1.97		0.4707	0.8485	0.0529	0.6051	0.5386	0.9998	0.9405	1	0.3338	0.9942	0.0429	0.684	0.366	1		0.9673	0.6503	1.2843	0.7572	2.5768	2.3666	0.8641	3.8692		100	100	100	100	100	100
				X-14556	LC/MS neg	47249								1.54265	0.96	2.02	2.58	1.23		0.8492	0.9084	0.194	0.7635	0.2031	0.9998	0.4473	0.9912	0.2842	0.9942	0.0455	0.6942	0.9857	1		0.9308	0.8361	1.0255	0.819	1.5477	1.4359	0.8019	2.0699		100	100	100	100	100	100
				X-14904	LC/MS neg	47204								3.35706	2.17	4.44	2.24	1.09		0.1282	0.8076	0.419	0.8374	0.8663	0.9998	0.3393	0.9708	0.214	0.9942	0.4303	0.9315	0.6808	1		0.5324	0.5084	0.5564	0.8058	1.5139	1.7873	1.1032	2.4714		100	100	100	100	100	100
				X-15136	LC/MS pos early	47619								6.19257	20.8	0.65	0.08	2.64		0.3087	0.8076	0.7526	0.8528	0.083	0.9998	0.0636	0.9488	0.569	0.9942	0.0985	0.8713	0.3453	1		1.0438	0.5743	1.5133	6.2611	1.2465	6.4638	11.9479	0.9796		86	75	100	63	83	69
				X-15245	LC/MS neg	46661								0.729372	0.45	1.49	1.2	0.36		0.8692	0.9084	0.3503	0.8125	0.1864	0.9998	0.3032	0.9708	0.3896	0.9942	0.7395	0.9938	0.1555	1		1.1865	1.7401	0.6329	1.2635	0.7884	0.8654	0.7869	0.944		71	75	67	75	75	77
				X-15461	LC/MS pos early	46283								1.22168	0.91	1.68	1.24	0.67		0.5907	0.8754	0.9716	0.875	0.2482	0.9998	0.6613	1	0.221	0.9942	0.3613	0.9315	0.4437	1		1.0524	1.2569	0.848	1.2033	1.1348	1.2857	1.1497	1.4217		100	100	100	100	100	100
				X-15523	LC/MS neg	47985								0.377196	0.02	6.52	15.12	0.06		0.3033	0.8076	0.9556	0.8677	0.4111	0.9998	0.2084	0.9515	0.8748	0.9984	0.5333	0.9484	0.5746	1		19.2873	36.481	2.0937	18.6918	7.8707	7.2751	0.9025	13.6477		100	100	100	100	100	100
				X-15608	LC/MS neg	47261								0.743319	0.24	1.08	6.75	1.51		0.5528	0.8744	0.0115	0.4823	0.0806	0.9998	0.1088	0.9488	0.3726	0.9942	0.0015	0.3397	0.5377	1		0.8419	0.6709	1.0129	0.4163	1.0515	0.6258	0.1616	1.09		71	75	67	50	92	77
				X-15853	LC/MS neg	47266								0.653201	0.43	0.86	2.13	1.07		0.0477	0.8076	0.0367	0.5433	0.1157	0.9998	0.0187	0.7116	0.7307	0.9976	0.0057	0.3683	0.7	1		1.2699	1.2266	1.3131	0.8784	1.2209	0.8295	0.5303	1.1286		100	100	100	100	100	100
				X-15854	LC/MS neg	47267								0.560006	0.26	0.89	3.18	0.92		0.038	0.8076	0.0335	0.5362	0.0388	0.9998	0.0069	0.6867	0.9937	1	0.0019	0.3397	0.9623	1		1.3532	1.4076	1.2988	0.8852	1.2258	0.7578	0.3627	1.1528		100	100	100	100	100	100
				X-15956	LC/MS neg	47268								0.71369	0.76	0.67	0.89	1.02		0.4794	0.8485	0.8815	0.8629	0.3608	0.9998	0.8836	1	0.2425	0.9942	0.5323	0.9484	0.4971	1		1.2958	1.2857	1.3059	1.1319	1.0887	0.9248	0.9781	0.8716		86	75	100	88	83	85
				X-16391	LC/MS neg	47277								0.705051	0.61	0.77	1.84	1.45		0.2842	0.8076	0.3482	0.8125	0.6644	0.9998	0.3026	0.9708	0.6338	0.9942	0.2715	0.9315	0.7429	1		1.0195	0.8318	1.2072	0.6688	1.0695	0.7188	0.5057	0.9318		100	100	100	63	83	62
				X-16580	LC/MS pos early	47804								0.982603	0.63	1.3	2.25	1.1		0.8321	0.9084	0.8781	0.8629	0.315	0.9998	0.402	0.9826	0.5576	0.9942	0.349	0.9315	0.5827	1		1.2071	1.1508	1.2633	0.9403	1.4529	1.1861	0.7297	1.6425		86	100	67	100	75	85
				X-17009	LC/MS neg	47545								0.599515	0.68	0.51	0.7	0.94		0.3118	0.8076	0.9089	0.8629	0.6649	0.9998	0.684	1	0.2949	0.9942	0.6582	0.9804	0.8388	1		1.444	1.4881	1.3998	1.2536	1.0561	0.8657	1.019	0.7123		86	75	100	88	100	100
				X-17010	LC/MS neg	47993								0.903779	0.6	1.56	1.2	0.46		0.8828	0.9084	0.5655	0.8374	0.2839	0.9998	0.5192	0.9954	0.3725	0.9942	0.6785	0.9808	0.2967	1		1.0611	1.4503	0.6719	1.161	0.8592	0.959	0.8716	1.0464		43	50	33	50	58	62
				X-17162	LC/MS pos late	47806								0.40937	0.51	0.36	1.33	1.9		0.1453	0.8076	0.4728	0.8374	0.6986	0.9998	0.4461	0.9912	0.1796	0.9942	0.7863	0.9938	0.4827	1		2.2818	1.573	2.9906	1.1879	2.0281	0.9341	0.8027	1.0656		86	75	100	75	83	77
				X-17303	LC/MS pos early	47809								1.72014	0.43	7.09	3.96	0.24		0.9289	0.909	0.9509	0.8674	0.6988	0.9998	0.8375	1	0.7285	0.9976	0.7921	0.9938	0.7752	1		1.7466	2.8162	0.6771	2.0134	2.7377	3.0044	1.2105	4.7984		57	50	67	75	58	69
				X-17348	LC/MS neg	46989								2.44391	8.7	0.34	0.12	2.97		0.9757	0.9214	0.9373	0.8674	0.1323	0.9998	0.3011	0.9708	0.2558	0.9942	0.241	0.9315	0.3049	1		0.977	0.4919	1.4622	2.3859	0.9789	2.3877	4.2799	0.4956		43	25	67	38	58	54
				X-17349	LC/MS neg	47999								2.04051	2.26	1.84	0.88	1.08		0.3546	0.8131	0.9378	0.8674	0.6986	0.9998	0.3682	0.9721	0.689	0.9942	0.7068	0.9938	0.8437	1		0.7036	0.6757	0.7315	1.101	1.0383	1.4357	1.5262	1.3451		43	25	67	38	58	54
				X-17438	LC/MS neg	46705								0.313191	0.23	0.75	0.6	0.19		0.3693	0.8298	0.2721	0.7906	0.2317	0.9998	0.1559	0.9488	0.8189	0.9984	0.9329	0.9962	0.1494	1		5.8185	9.8133	1.8237	6.0461	1.5946	1.8223	2.279	1.3656		100	100	100	100	100	100
				X-17653	LC/MS neg	46707								1.23411	1.26	1.2	0.82	0.87		0.5965	0.8754	0.9054	0.8629	0.6401	0.9998	0.4948	0.9912	0.9636	1	0.6357	0.9775	0.8238	1		0.8415	0.9022	0.7809	1.0204	0.8596	1.0385	1.1387	0.9383		71	75	67	88	75	85
				X-17690	LC/MS neg	46710								1	1	1	1	1																	1	1	1	1	1	1	1	1		0	0	0	0	8	8
				X-17749	LC/MS neg	47283								1.8541	2.45	1.57	1.34	2.1		0.4126	0.8361	0.7444	0.8527	0.1959	0.9998	0.1517	0.9488	0.7159	0.9976	0.4226	0.9315	0.3006	1		1.0439	0.6746	1.4133	1.1628	1.8167	1.9355	1.651	2.2201		86	75	100	88	100	100
				X-17842	LC/MS neg	47296								1.67589	0.95	2.45	2.45	0.95		0.6105	0.8754	0.6105	0.8374	0.4971	0.9998	0.9056	1	0.3892	0.9942	0.3407	0.9315	0.9126	1		0.6504	0.6686	0.6322	0.6504	1.09	1.09	0.6322	1.5478		14	25	0	25	17	23
				X-17852	LC/MS neg	47298								0.906875	0.79	0.98	2.01	1.62		0.4861	0.8544	0.009	0.4823	0.6957	0.9998	0.4562	0.9912	0.8215	0.9984	0.0149	0.535	0.1208	1		1.0298	0.7859	1.2736	0.7037	1.2599	0.9339	0.6215	1.2462		100	100	100	75	100	85
				X-17877	LC/MS neg	47307								1.02058	0.53	1.33	4	1.59		0.4224	0.8361	0.0112	0.4823	0.2046	0.9998	0.1597	0.9488	0.7207	0.9976	0.0038	0.364	0.3408	1		1.0447	0.806	1.2834	0.6163	1.4945	1.0662	0.4267	1.7056		100	100	100	100	100	100
				X-17910	LC/MS neg	47316								0.825426	0.55	0.97	3.27	1.87		0.2488	0.8076	0.0021	0.4006	0.2902	0.9998	0.135	0.9488	0.9411	1	0.0014	0.3397	0.1221	1		1.1319	0.7888	1.4749	0.6131	1.453	0.9343	0.4374	1.4311		86	75	100	63	100	85
				X-17919	LC/MS neg	47317								0.971304	0.86	1.05	1.73	1.42		0.9201	0.9084	0.0905	0.6985	0.4984	0.9998	0.5926	0.9979	0.6725	0.9942	0.0608	0.8075	0.4908	1		1.0106	0.8343	1.1869	0.7771	1.2151	0.9816	0.7199	1.2433		86	100	67	88	92	92
				X-17960	LC/MS neg	47320								0.678649	0.61	0.74	1.38	1.13		0.5431	0.8713	0.7066	0.8476	0.8871	0.9998	0.606	0.9981	0.7326	0.9976	0.6754	0.9808	0.8811	1		1.7498	1.6455	1.8542	1.3216	1.6157	1.1875	0.9977	1.3772		100	100	100	100	100	100
				X-17969	LC/MS neg	47323								0.81043	0.59	0.96	2.46	1.5		0.208	0.8076	0.0326	0.5362	0.1244	0.9998	0.0609	0.9488	0.8244	0.9984	0.0055	0.3683	0.6542	1		1.2196	0.9747	1.4645	0.7728	1.4352	0.9884	0.5709	1.4059		100	100	100	100	100	100
				X-17978	LC/MS neg	47328								0.678807	0.43	0.85	2.78	1.4		0.1707	0.8076	0.0145	0.5034	0.3356	0.9998	0.1147	0.9488	0.7516	0.9984	0.0082	0.4184	0.2828	1		1.1971	0.9957	1.3986	0.7128	1.297	0.8126	0.4299	1.1953		86	75	100	75	100	92
				X-17984	LC/MS neg	47327								0.738006	0.65	0.79	2	1.63		0.3064	0.8076	0.1363	0.7149	0.9838	0.9998	0.4698	0.9912	0.4611	0.9942	0.217	0.9315	0.3393	1		0.7775	0.592	0.9631	0.487	0.8643	0.5738	0.3821	0.7656		57	50	67	38	67	54
				X-18059	LC/MS neg	48039								0.903905	0.58	2.51	0.87	0.2		0.7274	0.8894	0.1173	0.6985	0.1836	0.9998	0.4871	0.9912	0.2216	0.9942	0.8327	0.9938	0.0705	1		1.0167	1.6932	0.3402	1.3382	0.5976	0.919	0.9831	0.855		71	100	33	75	58	62
				X-18167	LC/MS neg	47339								0.852403	0.65	1.42	0.78	0.35		0.8726	0.9084	0.1645	0.7336	0.3215	0.9998	0.427	0.9855	0.5396	0.9942	0.7304	0.9938	0.1342	1		1.2961	1.9143	0.678	1.579	0.8219	1.1048	1.2437	0.9659		100	100	100	88	100	92
				X-18278	LC/MS neg	47341								0.828122	0.78	0.86	1.87	1.7		0.5179	0.8612	0.0152	0.5034	0.9383	0.9998	0.6182	1	0.6768	0.9942	0.038	0.68	0.1126	1		1.209	0.8951	1.523	0.7959	1.4143	1.0012	0.6967	1.3057		100	100	100	88	100	92
				X-18345	LC/MS neg	47342								4.55776	1	8.11	8.11	1		0.6342	0.8754	0.6342	0.8374	0.6342	0.9998	1	1	0.4897	0.9942	0.4442	0.9315	1	1		0.0303	0.0303	0.0303	0.0303	0.1381	0.1381	0.0303	0.2458		0	0	0	0	17	15
				X-18349	LC/MS neg	47344								0.965031	0.79	1.1	1.77	1.26		0.7939	0.9068	0.422	0.8374	0.5412	0.9998	0.5494	0.9954	0.7971	0.9984	0.2586	0.9315	0.9004	1		0.8436	0.7455	0.9418	0.6671	0.9906	0.8141	0.5888	1.0394		71	75	67	50	75	62
				X-18410	LC/MS neg	47346								0.181525	0.21	0.17	2.38	2.84		0.5208	0.8621	0.7701	0.8572	0.5291	0.9998	0.385	0.9767	0.9924	1	0.7832	0.9938	0.558	1		4.379	2.2785	6.4795	1.3745	3.7994	0.7949	0.4705	1.1192		71	100	33	88	58	69
				X-18901	LC/MS neg	46690								2.58723	2.14	2.91	1.88	1.38		0.2798	0.8076	0.8651	0.8629	0.6611	0.9998	0.298	0.9708	0.631	0.9942	0.8274	0.9938	0.6988	1		0.5543	0.4651	0.6434	0.7305	1.2579	1.4341	0.9958	1.8724		14	0	33	38	33	46
				X-19232	LC/MS neg	47353								1.70596	2.58	1.19	0.77	1.68		0.2935	0.8076	0.8318	0.8617	0.1479	0.9998	0.0922	0.9488	0.7558	0.9984	0.3072	0.9315	0.2857	1		0.9026	0.6735	1.1317	1.2051	1.2373	1.5398	1.7368	1.3429		86	75	100	88	100	100
				X-19299	LC/MS neg	47673								0.625544	0.35	2.07	1.11	0.19		0.4257	0.8361	0.248	0.7692	0.0464	0.9998	0.0577	0.9488	0.343	0.9942	0.4492	0.9315	0.0485	1		2.3904	4.0193	0.7615	2.7169	1.1688	1.4953	1.4145	1.5761		100	100	100	100	100	100
				X-19497	LC/MS neg	47675								0.683894	0.4	2.16	1.02	0.19		0.4367	0.839	0.1687	0.7407	0.0478	0.9998	0.0604	0.9488	0.3415	0.9942	0.5786	0.9599	0.0366	1		2.8307	4.7589	0.9025	3.3399	1.4267	1.9359	1.9209	1.9508		100	100	100	100	100	100
				X-19746	LC/MS neg	47357								2.38529	1	3.77	3.77	1		0.5334	0.8664	0.5334	0.8374	0.5334	0.9998	1	1	0.3673	0.9942	0.3186	0.9315	1	1		0.3509	0.3509	0.3509	0.3509	0.837	0.837	0.3509	1.323		0	0	0	0	25	23
				X-19751	LC/MS neg	47358								2.34839	1.99	2.52	2.68	2.12		0.2978	0.8076	0.1262	0.6994	0.891	0.9998	0.5287	0.9954	0.3888	0.9942	0.1756	0.9288	0.3623	1		1.0273	0.6581	1.3965	0.985	2.4548	2.4125	1.3119	3.5131		100	100	100	88	100	92
				X-19763	LC/MS neg	47359								3.94488	1.31	4.63	13.6	3.86		0.5479	0.8721	0.0573	0.6327	0.7235	0.9998	0.8637	1	0.4879	0.9942	0.0693	0.8295	0.2988	1		1.3153	0.5413	2.0893	0.6261	5.878	5.1887	0.7108	9.6667		86	75	100	75	100	92
				X-19917	LC/MS neg	47367								1.26213	2.02	0.95	1.15	2.44		0.6913	0.8894	0.3218	0.8125	0.2986	0.9998	0.3247	0.9708	0.632	0.9942	0.9671	1	0.2009	1		0.7977	0.4641	1.1313	0.7004	1.1041	1.0068	0.9366	1.077		57	50	67	63	58	62
				X-19921	LC/MS neg	47371								1.81131	1.42	2.01	2.71	1.92		0.7096	0.8894	0.3284	0.8125	0.8549	0.9998	0.7029	1	0.8897	0.9991	0.5156	0.9456	0.4586	1		0.7218	0.4943	0.9494	0.5991	1.4301	1.3074	0.7039	1.9109		57	50	67	63	58	62
				X-19928	LC/MS neg	47377								0.580258	0.38	0.78	1.96	0.96		0.0701	0.8076	0.277	0.7906	0.7387	0.9998	0.1366	0.9488	0.2601	0.9942	0.2535	0.9315	0.6238	1		1.3818	1.4111	1.3525	0.9766	1.2069	0.8018	0.5422	1.0613		86	75	100	50	92	69
				X-19931	LC/MS neg	47380								0.776287	0.62	1.22	0.71	0.36		0.8167	0.9084	0.3009	0.8055	0.5016	0.9998	0.5348	0.9954	0.7461	0.9984	0.7617	0.9938	0.2803	1		1.8336	2.6974	0.9698	2.1788	1.0782	1.4234	1.6602	1.1866		100	100	100	100	100	100
				X-19940	LC/MS neg	47387								2.73486	1.05	4.69	3.86	0.86		0.3486	0.8101	0.6705	0.8462	0.5127	0.9998	0.8413	1	0.2507	0.9942	0.3857	0.9315	0.8824	1		0.5035	0.5406	0.4664	0.5535	1.327	1.377	0.5664	2.1876		43	50	33	63	67	77
				X-20100	LC/MS neg	47197								0.788193	0.57	0.93	2.51	1.54		0.1471	0.8076	0.01	0.4823	0.2714	0.9998	0.086	0.9488	0.7829	0.9984	0.0047	0.3683	0.2738	1		1.1298	0.8892	1.3704	0.6983	1.322	0.8905	0.5075	1.2736		100	100	100	100	100	100
				X-20172	LC/MS neg	47196								0.675227	0.59	0.71	2.84	2.37		0.2642	0.8076	0.0042	0.4176	0.8014	0.9998	0.346	0.9708	0.5205	0.9942	0.0104	0.4792	0.0678	1		1.4641	0.8677	2.0606	0.6911	1.7616	0.9886	0.5145	1.4626		100	100	100	100	100	100
				X-20747	LC/MS neg	47183								0.73894	0.9	0.69	2.32	3.04		0.6443	0.8809	0.0033	0.4006	0.4396	0.9998	0.8277	1	0.3709	0.9942	0.0477	0.7097	0.0159	1		0.8883	0.4395	1.337	0.4174	1.1272	0.6564	0.3954	0.9174		71	50	100	50	92	77
				X-21283	LC/MS pos early	46285								1.59255	1.61	1.58	1.69	1.73		0.2793	0.8076	0.33	0.8125	0.962	0.9998	0.4722	0.9912	0.407	0.9942	0.407	0.9315	0.5515	1		0.4322	0.3168	0.5476	0.4141	0.7063	0.6883	0.5115	0.865		29	25	33	38	58	62
				X-21353	LC/MS neg	46398								1.53487	1.28	1.77	1.49	1.08		0.2911	0.8076	0.5589	0.8374	0.7606	0.9998	0.5984	0.9981	0.3221	0.9942	0.474	0.9315	0.8574	1		0.456	0.439	0.4729	0.501	0.6549	0.6999	0.563	0.8369		29	25	33	25	33	31
				X-21364	LC/MS neg	46409								0.418543	0.57	0.33	1	1.7		0.0403	0.8076	0.5984	0.8374	0.5984	0.9998	0.2615	0.9708	0.0607	0.9942	1	1	0.5039	1		0.9416	0.6971	1.1861	0.5456	0.7901	0.3941	0.3941	0.3941		43	50	33	25	17	8
				X-21410	LC/MS neg	46455								0.185796	0.12	0.21	4.68	2.57		0.2437	0.8076	0.5421	0.8374	0.2289	0.9998	0.1102	0.9488	0.9767	1	0.1492	0.9157	0.6948	1		2.8542	1.5994	4.109	0.8931	2.4914	0.5303	0.1868	0.8739		71	75	67	63	75	69
				X-21467	LC/MS neg	46512								0.673218	0.52	0.94	1	0.56		0.1934	0.8076	0.3295	0.8125	0.3295	0.9998	0.1239	0.9488	0.8008	0.9984	1	1	0.2189	1		1.2516	1.6081	0.8951	1.2253	0.8688	0.8426	0.8426	0.8426		29	25	33	13	17	8
				X-21470	LC/MS neg	46515								0.0587235	0.02	0.07	16.22	3.62		0.0834	0.8076	0.303	0.8055	0.7461	0.9998	0.1543	0.9488	0.2852	0.9942	0.2764	0.9315	0.6464	1		4.7647	2.0637	7.4657	1.0481	3.9964	0.2798	0.0325	0.5271		57	50	67	50	50	46
				X-21471	LC/MS neg	46516								0.280368	0.07	0.61	5.3	0.64		0.0696	0.8076	0.8155	0.8616	0.5675	0.9998	0.1014	0.9488	0.3359	0.9942	0.5162	0.9456	0.8283	1		0.6306	0.771	0.4903	0.4135	0.3939	0.1768	0.0561	0.2975		57	50	67	25	42	23
				X-21788	LC/MS neg	46964								0.0242457	0.07	0.01	0.44	3.34		0.1102	0.8076	0.9631	0.8698	0.5262	0.9998	0.4839	0.9912	0.1076	0.9942	0.582	0.9599	0.7072	1		58.13	26.7761	89.4839	14.3658	45.1736	1.4094	1.9554	0.8633		71	50	100	50	58	46
				X-21796	LC/MS neg	46972								0.628179	0.52	0.73	1.47	1.06		0.0025	0.7598	0.1222	0.6985	0.2519	0.9998	0.0047	0.6867	0.1005	0.9942	0.0366	0.68	0.7814	1		1.2896	1.2508	1.3283	0.9528	1.1468	0.8101	0.6547	0.9654		100	100	100	100	100	100
				X-21959	LC/MS neg	47205								7.31579	9.26	6.18	1.14	1.71		0.1182	0.8076	0.7139	0.8488	0.8919	0.9998	0.2367	0.9683	0.2865	0.9942	0.8516	0.9938	0.7492	1		0.2527	0.1862	0.3191	0.9555	1.1459	1.8487	1.7247	1.9727		43	50	33	50	50	54
				X-22030	LC/MS neg	47276								1.40884	1.18	1.64	1.34	0.96		0.0855	0.8076	0.5965	0.8374	0.8703	0.9998	0.2689	0.9708	0.1646	0.9942	0.5759	0.9599	0.8148	1		0.7465	0.7607	0.7323	0.8302	0.968	1.0517	0.8997	1.2037		71	50	100	75	100	100
				X-22062	LC/MS neg	47308								0.765571	0.47	0.93	3.55	1.81		0.3149	0.8076	0.008	0.4823	0.2515	0.9998	0.1454	0.9488	0.9131	1	0.0036	0.364	0.2597	1		1.1961	0.8507	1.5415	0.6265	1.4853	0.9157	0.4024	1.4291		100	100	100	75	100	85
				X-22092	LC/MS neg	47338								0.896477	0.79	1.29	0.44	0.27		0.7807	0.9061	0.1478	0.7278	0.7376	0.9998	0.9688	1	0.6553	0.9942	0.3543	0.9315	0.2535	1		1.6634	2.6214	0.7054	2.3486	0.8059	1.4912	2.0758	0.9065		86	75	100	75	100	92
				X-22099	LC/MS neg	47345								1.92595	1.46	2.16	2.87	1.94		0.4202	0.8361	0.1591	0.7336	0.829	0.9998	0.6817	1	0.4565	0.9942	0.189	0.9315	0.4354	1		1.1195	0.7611	1.4778	0.9377	2.3378	2.1561	1.1143	3.1979		100	100	100	88	100	92
				X-22142	LC/MS neg	47388								1.11059	1.85	0.93	2	3.99		0.8114	0.9084	0.0524	0.6051	0.5702	0.9998	0.5799	0.9954	0.8091	0.9984	0.2382	0.9315	0.1082	1		1.5471	0.6198	2.4744	0.8835	2.3818	1.7182	1.1472	2.2891		100	100	100	100	100	100
				X-22776	LC/MS neg	48081								1.38949	1.89	1.08	0.91	1.6		0.1819	0.8076	0.756	0.8537	0.4142	0.9998	0.1443	0.9488	0.69	0.9942	0.6785	0.9808	0.4733	1		0.8886	0.6826	1.0947	0.9861	1.1372	1.2347	1.2897	1.1797		86	75	100	88	92	92
				X-22835	LC/MS neg	48186								0.367904	0.33	0.64	0.29	0.15		0.2069	0.8076	0.0281	0.5251	0.6288	0.9998	0.5797	0.9954	0.206	0.9942	0.0319	0.678	0.2392	1		5.5028	9.5662	1.4395	6.3491	1.1783	2.0245	3.132	0.9171		100	100	100	100	100	100
				X-23048	LC/MS neg	48590								2.28284	2.49	1.94	0.46	0.59		0.201	0.8076	0.3122	0.8082	0.8943	0.9998	0.3279	0.9708	0.3952	0.9942	0.3547	0.9315	0.5713	1		0.4232	0.5313	0.315	0.9262	0.4631	0.9661	1.3211	0.6112		29	25	33	38	42	46
				X-23060	LC/MS neg	48602								1.23264	2.18	0.82	0.88	2.32		0.8442	0.9084	0.5156	0.8374	0.3092	0.9998	0.4031	0.9826	0.5441	0.9942	0.7594	0.9938	0.2914	1		0.8412	0.5066	1.1759	0.8053	1.0728	1.0369	1.1041	0.9697		71	50	100	63	83	77
				X-23062	LC/MS neg	48604								0.874628	1.15	0.64	0.66	1.19		0.9948	0.9214	0.9712	0.875	0.2369	0.9998	0.4134	0.9826	0.3813	0.9942	0.3214	0.9315	0.4593	1		2.0858	1.9086	2.263	2.0548	1.8553	1.8243	2.2009	1.4477		100	100	100	100	100	100
				X-23064	LC/MS neg	48606								0.862597	0.78	10.45	0.12	0.01		0.8731	0.9084	0.1107	0.6985	0.7079	0.9998	0.7135	1	0.8751	0.9984	0.3063	0.9315	0.2064	1		23.1996	45.9968	0.4025	40.9064	2.3051	20.0119	35.8161	4.2076		57	75	33	75	42	54
				X-23103	LC/MS neg	48648								1.07992	1.2	1.07	13.51	15.08		0.3821	0.8361	0.0722	0.6622	0.277	0.9998	0.8782	1	0.1595	0.9942	0.5271	0.9484	0.0701	1		1.2062	0.15	2.2624	0.1648	2.344	1.3026	0.1796	2.4257		29	0	67	13	42	31
				X-23105	LC/MS neg	48650								1.19352	1.81	0.88	0.98	2.01		0.6925	0.8894	0.5798	0.8374	0.8727	0.9998	0.7027	1	0.8634	0.9984	0.7492	0.9938	0.6495	1		0.6697	0.4452	0.8942	0.6266	0.8424	0.7993	0.808	0.7907		57	50	67	50	58	54
				X-23109	LC/MS neg	48654								1.52292	2.13	0.98	0.51	1.12		0.9029	0.9084	0.9003	0.8629	0.7967	0.9998	0.9256	1	0.7821	0.9984	0.757	0.9938	0.9328	1		0.4733	0.4472	0.4994	0.6994	0.4947	0.7208	0.9516	0.49		43	50	33	38	67	62
				X-23115	LC/MS neg	48660								0.134995	0.09	0.19	1.81	0.83		0.2705	0.8076	0.8295	0.8616	0.8896	0.9998	0.5016	0.9912	0.3638	0.9942	0.9506	1	0.8218	1		16.0361	17.5458	14.5263	9.5435	8.6574	2.1648	1.5412	2.7885		100	100	100	100	100	100
				X-23173	LC/MS neg	48853								0.845531	0.62	1.32	1.02	0.48		0.6038	0.8754	0.4253	0.8374	0.799	0.9998	0.5955	0.9981	0.8462	0.9984	0.6573	0.9804	0.503	1		1.1109	1.5004	0.7214	1.2145	0.8357	0.9393	0.9286	0.9501		86	75	100	75	75	69
				X-23188	LC/MS neg	48882								3.5674	2.54	7.65	0.75	0.25		0.053	0.8076	0.9312	0.8667	0.5561	0.9998	0.3216	0.9708	0.0675	0.9942	0.6834	0.9816	0.667	1		0.6461	1.0333	0.2588	1.8313	1.1197	2.3049	2.6293	1.9805		71	75	67	75	92	92
				X-23277	LC/MS neg	48973								0.554759	0.36	1.66	0.84	0.18		0.9976	0.9217	0.143	0.7278	0.2186	0.9998	0.393	0.9802	0.3634	0.9942	0.8362	0.9938	0.0916	1		2.0234	3.432	0.6147	2.327	0.8189	1.1225	1.2219	1.023		71	75	67	88	92	100
				X-23278	LC/MS neg	48974								0.904232	0.62	1.86	0.89	0.3		0.9795	0.9214	0.1102	0.6985	0.2361	0.9998	0.4198	0.9834	0.3731	0.9942	0.7148	0.9938	0.0815	1		1.465	2.2597	0.6702	1.8301	0.9596	1.3247	1.4005	1.249		86	100	67	100	83	92
				X-23287	LC/MS neg	48985								0.460541	1	0.31	1.1	3.57		0.1738	0.8076	0.1	0.6985	0.1738	0.9998	1	1	0.0545	0.9942	0.7975	0.9938	0.0609	1		1.1797	0.5164	1.8429	0.5164	1.2065	0.5433	0.5164	0.5702		14	0	33	13	17	15
				X-23423	LC/MS neg	49283								1.69097	1.4	1.96	1.51	1.08		0.4941	0.8549	0.8587	0.8629	0.7626	0.9998	0.4988	0.9912	0.7785	0.9984	0.9199	0.9953	0.7601	1		0.62	0.5955	0.6445	0.7156	0.9527	1.0484	0.8357	1.261		57	50	67	75	50	62
				X-23428	LC/MS neg	49288								1.0984	0.74	1.73	1.35	0.57		0.6421	0.8789	0.5321	0.8374	0.082	0.9998	0.3563	0.9708	0.1089	0.9942	0.3396	0.9315	0.1321	1		0.9868	1.2553	0.7183	1.0891	0.9816	1.0839	0.923	1.2449		86	100	67	88	75	77
				X-23429	LC/MS neg	49289								1.08588	0.99	1.2	0.93	0.77		0.8699	0.9084	0.3556	0.8125	0.7341	0.9998	0.9035	1	0.7139	0.9976	0.6309	0.9747	0.4214	1		0.8978	1.0138	0.7819	1.0111	0.8617	0.9749	1.0083	0.9416		86	75	100	75	67	62
				X-23438	LC/MS neg	49298								0.940149	0.75	1.24	1.04	0.63		0.7904	0.9063	0.1724	0.7407	0.143	0.9998	0.2314	0.9643	0.3684	0.9942	0.929	0.9953	0.0772	1		0.9958	1.2198	0.7717	1.0684	0.8635	0.9362	0.9171	0.9554		100	100	100	100	100	100
				X-23456	LC/MS neg	49316								1.63379	1.26	2.01	1.6	1		0.2913	0.8076	0.7401	0.8527	0.7401	0.9998	0.6116	0.9981	0.3132	0.9942	0.5927	0.9599	1	1		0.5617	0.5617	0.5617	0.6341	0.8453	0.9177	0.7065	1.1289		14	25	0	38	17	31
				X-23467	LC/MS neg	49327								1.86575	1.29	2.96	1.2	0.52		0.2137	0.8076	0.6304	0.8374	0.4076	0.9998	0.7639	1	0.1374	0.9942	0.7748	0.9938	0.4061	1		0.5557	0.7288	0.3826	0.8355	0.757	1.0368	0.9422	1.1314		57	50	67	50	67	62
				X-23469	LC/MS neg	49329								0.743732	0.82	0.7	1.3	1.52		0.3409	0.8101	0.3421	0.8125	0.5681	0.9998	0.7875	1	0.2709	0.9942	0.7528	0.9938	0.3352	1		0.9213	0.7305	1.1122	0.6635	0.943	0.6852	0.5966	0.7737		100	100	100	88	83	77
				X-23470	LC/MS neg	49330								1.24244	0.9	1.72	1.39	0.72		0.2859	0.8076	0.9163	0.8629	0.1935	0.9998	0.8639	1	0.0917	0.9942	0.2537	0.9315	0.4379	1		0.6414	0.7457	0.5371	0.7068	0.7315	0.7969	0.6679	0.926		14	25	0	38	58	69
				X-23475	LC/MS neg	49335								1.52724	1.54	1.51	0.79	0.8		0.0279	0.7678	0.2597	0.7775	0.7841	0.9998	0.0824	0.9488	0.1384	0.9942	0.2591	0.9315	0.5792	1		0.8442	0.9385	0.75	1.1914	0.9421	1.2893	1.4444	1.1342		100	100	100	100	100	100
				X-23482	LC/MS neg	49342								0.998729	1.28	0.77	0.74	1.23		0.7839	0.9061	0.5926	0.8374	0.2098	0.9998	0.2921	0.9708	0.4647	0.9942	0.5472	0.9537	0.2558	1		1.1011	0.9855	1.2167	1.1247	1.0761	1.0997	1.2639	0.9355		100	100	100	100	100	100
				X-23507	LC/MS neg	49383								2.44519	3.49	1.48	0.46	1.08		0.2061	0.8076	0.8202	0.8616	0.3427	0.9998	0.1342	0.9488	0.8075	0.9984	0.3428	0.9315	0.6411	1		0.8356	0.8028	0.8683	1.8024	1.0764	2.0432	2.8019	1.2844		100	100	100	100	100	100
				X-23552	LC/MS neg	49428								3.86796	3.19	4.55	1.43	1		0.2443	0.8076	0.9822	0.8763	0.9822	0.9998	0.427	0.9855	0.3828	0.9942	0.9712	1	1	1		0.1136	0.1136	0.1136	0.238	0.3151	0.4394	0.3623	0.5165		0	0	0	13	25	31
				X-23581	LC/MS pos early	49457								0.831105	0.63	1.52	0.72	0.3		0.7542	0.8961	0.4481	0.8374	0.9291	0.9998	0.7823	1	0.87	0.9984	0.5861	0.9599	0.5884	1		1.8994	2.9315	0.8674	2.3856	1.0924	1.5786	1.8398	1.3175		100	100	100	100	92	92
				X-23583	LC/MS pos early	49459								4.8843	3.24	5.74	3.38	1.91		0.2063	0.8076	0.3521	0.8125	0.8589	0.9998	0.3186	0.9708	0.4196	0.9942	0.5383	0.9502	0.4791	1		0.4624	0.3182	0.6067	0.6751	2.0459	2.2585	1.032	3.485		71	50	100	75	92	92
				X-23587	LC/MS pos early	49463								1.91717	2.89	1.64	2	3.52		0.128	0.8076	0.5268	0.8374	0.5927	0.9998	0.4771	0.9912	0.1365	0.9942	0.3491	0.9315	0.9495	1		1.0238	0.4532	1.5943	0.8817	2.1049	1.9628	1.3102	2.6155		100	100	100	100	100	100
				X-23600	LC/MS neg	49476								2.32462	6.61	0.81	0.35	2.83		0.3317	0.8101	0.5448	0.8374	0.0608	0.9998	0.0546	0.9488	0.4696	0.9942	0.2748	0.9315	0.113	1		1.0637	0.5555	1.5718	2.1144	1.4219	2.4727	3.6733	1.272		100	100	100	100	100	100
				X-23639	LC/MS pos early	49515								1.39218	0.85	1.93	2.27	1		0.7281	0.8894	0.3581	0.8142	0.4525	0.9998	0.7785	1	0.4248	0.9942	0.1842	0.9315	0.9121	1		0.9493	0.949	0.9496	0.8786	1.3923	1.3216	0.8082	1.8349		100	100	100	100	100	100
				X-23644	LC/MS pos early	49521								0.786452	2.11	0.44	0.8	3.81		0.7694	0.9017	0.7232	0.8517	0.5171	0.9998	0.5186	0.9954	0.794	0.9984	0.8102	0.9938	0.5244	1		4.7446	1.9724	7.5169	3.0644	5.4116	3.7314	4.1564	3.3063		57	50	67	63	58	62
				X-23655	LC/MS pos early	49532								1.32474	0.43	3.68	3.27	0.38		0.9134	0.9084	0.9799	0.8763	0.9342	0.9998	0.8955	1	0.9848	1	0.9306	0.9953	0.9709	1		1.9634	2.8438	1.083	2.0305	2.5339	2.601	1.2172	3.9849		86	75	100	75	92	85
				X-23657	LC/MS pos early	49534								2.72684	0.5	11.78	5.75	0.25		0.5387	0.8694	0.8708	0.8629	0.266	0.9998	0.7233	1	0.2127	0.9942	0.4363	0.9315	0.4141	1		0.5817	0.934	0.2294	0.702	1.4658	1.5862	0.47	2.7023		71	75	67	75	83	85
				X-23662	LC/MS pos early	49539								0.609675	0.14	0.76	16.48	3.09		0.3922	0.8361	0.9325	0.8667	0.2259	0.9998	0.161	0.9488	0.7853	0.9984	0.2926	0.9315	0.4661	1		5.7552	2.8123	8.6981	1.6069	7.6572	3.5088	0.4014	6.6163		86	100	67	88	92	92
				X-23665	LC/MS pos early	49542								0.937529	0.91	0.96	1.3	1.25		0.7765	0.9043	0.1746	0.7428	0.9868	0.9998	0.8541	1	0.8265	0.9984	0.273	0.9315	0.374	1		1.0725	0.9549	1.19	0.9142	1.1637	1.0055	0.8735	1.1374		100	100	100	100	100	100
				X-23671	LC/MS pos early	49548								0.435649	0.28	1	1	0.28		0.2521	0.8076	0.2521	0.7692	0.2521	0.9998	0.122	0.9488	1	1	1	1	0.1501	1		0.3714	0.5809	0.1618	0.3714	0.1618	0.1618	0.1618	0.1618		14	25	0	13	8	8
				X-23680	LC/MS pos late	49557								5.71835	2.4	8.75	3.97	1.09		0.3355	0.8101	0.7784	0.8572	0.8897	0.9998	0.5664	0.9954	0.4208	0.9942	0.7344	0.9938	0.9275	1		0.158	0.1511	0.1649	0.2572	0.8043	0.9035	0.3633	1.4436		14	0	33	13	33	31
				X-23710	LC/MS pos early	49588								2.44885	2.1	2.7	1.79	1.4		0.4234	0.8361	0.3902	0.8303	0.7354	0.9998	0.747	1	0.4082	0.9942	0.3358	0.9315	0.736	1		0.6862	0.5719	0.8004	0.8878	1.4788	1.6804	1.2037	2.1571		57	50	67	63	75	77
				X-23728	LC/MS pos early	49626								3.75159	5.05	2.81	0.77	1.38		0.1703	0.8076	0.859	0.8629	0.8691	0.9998	0.2868	0.9708	0.369	0.9942	0.9917	1	0.8276	1		0.3462	0.2908	0.4015	0.8794	0.7655	1.2988	1.468	1.1296		43	50	33	50	67	69
				X-23732	LC/MS pos early	49630								6.87385	9.16	1.18	0.05	0.4		0.4755	0.8485	0.1765	0.743	0.634	0.9998	0.4156	0.9826	0.8604	0.9984	0.1441	0.9157	0.5629	1		0.7927	1.1309	0.4544	5.7458	0.4958	5.4489	10.3607	0.5372		14	25	0	25	25	31
				X-23733	LC/MS pos early	49631								1.18281	0.87	3.21	0.56	0.15		0.8461	0.9084	0.1473	0.7278	0.1577	0.9998	0.2654	0.9708	0.363	0.9942	0.9741	1	0.074	1		1.8899	3.2793	0.5006	3.0714	1.0539	2.2354	2.8636	1.6072		86	100	67	88	75	77
				X-23737	LC/MS pos early	49635								1.32946	2.65	0.97	1.33	3.66		0.2717	0.8076	0.0533	0.6051	0.0839	0.9998	0.0572	0.9488	0.6145	0.9942	0.8467	0.9938	0.0237	1		1.1349	0.4876	1.7823	0.8905	1.7532	1.5088	1.2935	1.7242		86	75	100	88	100	100
				X-23738	LC/MS pos early	49636								2.02445	1.21	3.28	1.76	0.65		0.0956	0.8076	0.349	0.8125	0.3206	0.9998	0.6154	1	0.0584	0.9942	0.1271	0.9088	0.9699	1		0.593	0.7192	0.4668	0.7953	0.9982	1.2005	0.8714	1.5296		71	50	100	75	100	100
				X-23739	LC/MS pos early	49637								0.767674	1.68	0.62	2.34	6.32		0.72	0.8894	0.0079	0.4823	0.3049	0.9998	0.3421	0.9708	0.6193	0.9942	0.1299	0.9088	0.0191	1		1.3636	0.3724	2.3547	0.4999	1.9104	1.0468	0.6274	1.4662		57	25	100	50	83	77
				X-23748	LC/MS pos early	49646								0.720623	0.48	1.16	1.31	0.54		0.6407	0.8788	0.5861	0.8374	0.6566	0.9998	0.5323	0.9954	0.987	1	0.9349	0.9974	0.5301	1		1.799	2.3309	1.267	1.7266	1.3687	1.2964	1.1224	1.4704		100	100	100	100	100	100
				X-23752	LC/MS pos late	49650								0.984287	0.65	1.15	3.66	2.05		0.486	0.8544	0.0374	0.5433	0.9577	0.9998	0.6053	0.9981	0.6374	0.9942	0.0786	0.8378	0.1777	1		1.2219	0.8	1.6438	0.6581	1.7665	1.2027	0.5162	1.8891		100	100	100	100	100	100
				X-23753	LC/MS pos late	49651								1.09394	0.74	1.3	3.03	1.71		0.6502	0.8813	0.157	0.7336	0.9753	0.9998	0.7389	1	0.7576	0.9984	0.2379	0.9315	0.3688	1		1.2189	0.8986	1.5392	0.7802	1.7722	1.3334	0.6617	2.0052		100	100	100	100	100	100
				X-23767	LC/MS pos late	49665								0.405868	0.05	1.53	9.45	0.32		0.0373	0.8076	0.7821	0.8572	0.107	0.9998	0.0147	0.6867	0.687	0.9942	0.1273	0.9088	0.3776	1		3.1732	4.8227	1.5238	2.5346	1.9266	1.2879	0.2465	2.3294		100	100	100	100	92	92
				X-23780	LC/MS pos early	49679								1.03562	0.47	2.22	2.22	0.47		0.9434	0.9169	0.8486	0.8629	0.1777	0.9998	0.3236	0.9708	0.3441	0.9942	0.3402	0.9315	0.3227	1		1.0248	1.3912	0.6584	1.0248	1.0614	1.0613	0.6584	1.4643		86	75	100	63	92	77
				X-23782	LC/MS pos late	49681								1.10019	0.97	1.25	1.07	0.83		0.9733	0.9214	0.804	0.8616	0.8288	0.9998	0.8637	1	0.894	0.9991	0.7077	0.9938	0.9838	1		1.1308	1.233	1.0287	1.2167	1.1582	1.2441	1.2004	1.2877		100	100	100	100	100	100
				X-23908	LC/MS neg	49816								1.90164	0.88	3.22	2.81	0.77		0.6186	0.8754	0.7989	0.861	0.52	0.9998	0.9191	1	0.4081	0.9942	0.4692	0.9315	0.803	1		0.5073	0.5723	0.4423	0.5391	0.9329	0.9647	0.5059	1.4235		43	50	33	50	58	62
				X-23919	LC/MS neg	49828								1.91325	1.79	2.12	0.69	0.58		0.0947	0.8076	0.2348	0.7692	0.8399	0.9998	0.1922	0.9488	0.2691	0.9942	0.2613	0.9315	0.5218	1		0.5948	0.7508	0.4389	1.0489	0.684	1.138	1.3469	0.929		57	75	33	88	75	92
				X-23922	LC/MS neg	49831								1.75422	1.74	1.79	0.48	0.47		0.0429	0.8076	0.011	0.4823	0.7712	0.9998	0.1058	0.9488	0.1844	0.9942	0.0208	0.5868	0.1203	1		0.5631	0.7679	0.3583	1.051	0.4999	0.9878	1.3341	0.6416		43	75	0	88	50	77
				X-23925	LC/MS neg	49834								0.96635	1.27	0.78	0.99	1.61		0.8724	0.9084	0.8738	0.8629	0.4816	0.9998	0.7068	1	0.5286	0.9942	0.6573	0.9804	0.5825	1		0.8113	0.6228	0.9998	0.7063	0.8891	0.784	0.7898	0.7783		71	75	67	75	67	69
				X-23941	LC/MS neg	49850								2.54886	3.61	1.15	0.24	0.76		0.7706	0.9017	0.4303	0.8374	0.6478	0.9998	0.6077	0.9981	0.9035	0.9991	0.318	0.9315	0.8297	1		1.0633	1.209	0.9177	2.7882	0.9853	2.7102	4.3675	1.0528		57	50	67	50	42	38
				X-23974	LC/MS neg	49883								2.96138	3.36	2.65	1.02	1.29		0.009	0.7598	0.716	0.8488	0.4623	0.9998	0.021	0.7494	0.1256	0.9942	0.7609	0.9938	0.4851	1		0.6007	0.5248	0.6766	1.1435	1.2361	1.7789	1.7622	1.7957		71	50	100	75	100	100
				X-24027	LC/MS pos late	52056								0.594828	0.36	0.94	1.81	0.69		0.007	0.7598	0.7042	0.8476	0.0312	0.9998	0.0018	0.6867	0.6003	0.9942	0.0411	0.68	0.227	1		1.2839	1.5221	1.0458	1.0331	1.0145	0.7637	0.5442	0.9832		100	100	100	100	100	100
				X-24084	LC/MS neg	52113								0.876915	0.77	0.95	1.8	1.45		0.878	0.9084	0.076	0.6635	0.9136	0.9998	0.8571	1	0.9738	1	0.1677	0.9157	0.2197	1		1.1163	0.9124	1.3201	0.8058	1.2894	0.9789	0.6991	1.2588		100	100	100	100	100	100
				X-24208	LC/MS pos late	52244								6.34289	11.29	2.83	0.35	1.41		0.0295	0.7678	0.6354	0.8374	0.2711	0.9998	0.0275	0.7592	0.3756	0.9942	0.2079	0.9315	0.6817	1		0.2826	0.2347	0.3304	1.4417	0.6334	1.7925	2.6486	0.9364		43	25	67	50	58	62
				X-24210	LC/MS pos late	52246								4.98745	5.25	4.55	0.53	0.61		0.0201	0.7678	0.367	0.82	0.123	0.9998	0.0106	0.6867	0.4972	0.9942	0.0553	0.7632	0.6621	1		0.916	1.1355	0.6964	3.5506	1.9339	4.5685	5.9656	3.1714		100	100	100	100	100	100
				X-24212	LC/MS pos late	52248								4.64065	7.52	1.8	0.24	1.01		0.0067	0.7598	0.0901	0.6985	0.0424	0.9998	0.0021	0.6867	0.5171	0.9942	0.0051	0.3683	0.8015	1		0.6932	0.6881	0.6983	2.9319	0.9782	3.2169	5.1757	1.2582		86	75	100	88	100	100
				X-24231	LC/MS pos early	52268								1.28549	2.14	0.84	0.76	1.93		0.5745	0.8754	0.5378	0.8374	0.3787	0.9998	0.3247	0.9708	0.8118	0.9984	0.8264	0.9938	0.3433	1		0.4494	0.3064	0.5923	0.4808	0.5463	0.5777	0.6551	0.5002		29	0	67	13	42	31
				X-24238	LC/MS pos early	52276								1.5609	1.49	1.63	1.16	1.06		0.1007	0.8076	0.6047	0.8374	0.8532	0.9998	0.2034	0.9488	0.274	0.9942	0.7868	0.9938	0.6548	1		0.7775	0.7544	0.8006	0.9389	1.0521	1.2136	1.1234	1.3037		86	75	100	88	100	100
				X-24243	LC/MS pos early	52286								0.826508	0.88	0.8	1.83	2.02		0.275	0.8076	0.2093	0.7692	0.8488	0.9998	0.529	0.9954	0.3488	0.9942	0.3809	0.9315	0.3535	1		1.509	0.9979	2.02	0.9398	1.8164	1.2472	0.8817	1.6127		100	100	100	100	92	92
				X-24246	LC/MS pos early	52289								0.624051	0.1	3.13	6.67	0.21		0.5395	0.8694	0.8389	0.8624	0.8308	0.9998	0.5699	0.9954	0.769	0.9984	0.7363	0.9938	0.9947	1		3.9915	6.5999	1.3832	3.6245	2.8579	2.4909	0.6492	4.3326		43	25	67	38	67	62
				X-24359	LC/MS neg	52555								0.974793	0.86	1.61	0.34	0.18		0.8658	0.9084	0.218	0.7692	0.795	0.9998	0.9501	1	0.7548	0.9984	0.4225	0.9315	0.3398	1		0.2896	0.491	0.0882	0.4566	0.1153	0.2823	0.4221	0.1424		14	25	0	25	17	23
				X-24408	LC/MS pos early	52637								1.38098	0.61	2.22	3.36	0.92		0.851	0.9084	0.2785	0.7906	0.2412	0.9998	0.3477	0.9708	0.4653	0.9942	0.0768	0.8348	0.9524	1		0.9032	0.942	0.8645	0.7574	1.3932	1.2473	0.5727	1.9219		100	100	100	88	100	92
				X-24410	LC/MS pos early	52639								2.47443	0.97	3.43	5.54	1.57		0.5867	0.8754	0.3195	0.8125	0.8288	0.9998	0.8209	1	0.5802	0.9942	0.3282	0.9315	0.6145	1		1.4019	1.0905	1.7134	1.0756	3.7952	3.4689	1.0607	5.8771		86	75	100	88	92	92
				X-24412	LC/MS pos early	52641								0.0400454	0.02	1.45	1.29	0.02		0.4099	0.8361	0.3399	0.8125	0.2651	0.9998	0.188	0.9488	0.8249	0.9984	0.8916	0.9953	0.1925	1		19.7351	38.858	0.6122	19.774	0.7514	0.7903	0.6901	0.8906		29	25	33	25	42	38
				X-24425	LC/MS pos early	52655								1.28943	0.96	1.85	1.13	0.58		0.265	0.8076	0.4556	0.8374	0.5081	0.9998	0.7467	1	0.2005	0.9942	0.9443	0.9989	0.3727	1		0.946	1.1943	0.6976	1.1705	0.9952	1.2198	1.1468	1.2927		100	100	100	100	100	100
				X-24453	LC/MS pos early	52770								1.78555	0.9	2.92	2.54	0.78		0.4212	0.8361	0.1596	0.7336	0.5152	0.9998	0.9138	1	0.2932	0.9942	0.1027	0.8742	0.6135	1		0.7307	0.82	0.6413	0.7787	1.2567	1.3047	0.7374	1.872		100	100	100	100	100	100
				X-24456	LC/MS pos early	52773								0.708126	0.48	1.35	0.97	0.35		0.4821	0.8509	0.1069	0.6985	0.1068	0.9998	0.1146	0.9488	0.4813	0.9942	0.9997	1	0.045	1		1.4705	2.1792	0.7618	1.618	0.8937	1.0413	1.0569	1.0257		71	100	33	100	75	92
				X-24465	LC/MS pos early	52782								1.64053	0.83	4.28	1.57	0.31		0.7228	0.8894	0.5302	0.8374	0.1226	0.9998	0.3961	0.9802	0.1661	0.9942	0.4359	0.9315	0.1677	1		0.8379	1.2839	0.3919	1.1773	1.0352	1.3746	1.0707	1.6785		86	100	67	88	83	85
				X-24474	LC/MS pos early	52791								6.83126	5.95	8.14	0.93	0.68		0.2336	0.8076	0.8024	0.8616	0.7387	0.9998	0.2944	0.9708	0.5218	0.9942	0.6376	0.9775	0.9575	1		1.2244	1.461	0.9878	5.0741	4.5145	8.3642	8.6871	8.0412		100	100	100	100	100	100
				X-24544	LC/MS neg	52865								0.703176	0.49	0.89	2.14	1.18		0.3754	0.8361	0.511	0.8374	0.8143	0.9998	0.4407	0.9908	0.6304	0.9942	0.4719	0.9315	0.7862	1		1.2563	1.1541	1.3584	0.8588	1.2809	0.8834	0.5634	1.2034		57	50	67	50	58	54
				X-24545	LC/MS neg	52866								1.07354	0.89	1.37	0.95	0.62		0.9907	0.9214	0.5427	0.8374	0.7298	0.9998	0.806	1	0.8076	0.9984	0.4427	0.9315	0.8655	1		0.8227	1.0177	0.6276	0.9611	0.7447	0.8832	0.9045	0.8618		57	50	67	63	58	62
				X-24546	LC/MS neg	52867								0.292202	0.03	0.58	19.3	0.91		0.2053	0.8076	0.4443	0.8374	0.357	0.9998	0.1385	0.9488	0.7898	0.9984	0.1803	0.9315	0.9181	1		0.7399	0.7749	0.7049	0.3981	0.558	0.2162	0.0213	0.4111		57	50	67	38	50	38
				X-24556	LC/MS neg	52877								1.34135	1.35	1.33	0.91	0.92		0.3039	0.8076	0.7235	0.8517	0.8747	0.9998	0.4132	0.9826	0.5203	0.9942	0.6795	0.9808	0.9004	1		0.8112	0.8437	0.7787	0.9921	0.9071	1.0881	1.1405	1.0356		100	100	100	100	100	100
				X-24586	LC/MS pos early	52907								1.04939	0.6	12.55	0.83	0.04		0.7929	0.9065	0.6743	0.847	0.4753	0.9998	0.7539	1	0.4774	0.9942	0.8096	0.9938	0.4715	1		6.8287	13.1393	0.5181	10.4848	3.51	7.166	7.8303	6.5018		57	75	33	63	67	69
				X-24608	LC/MS neg	53023								0.897377	0.99	0.81	0.87	1.06		0.6816	0.8894	0.8101	0.8616	0.758	0.9998	0.9437	1	0.6014	0.9942	0.6581	0.9804	0.9655	1		1.0485	1.0179	1.0791	1.0117	0.9777	0.9409	1.0056	0.8763		71	75	67	88	83	92
				X-24658	LC/MS neg	53086								0.0930233	0.02	0.29	4.7	0.36		0.0455	0.8076	0.4804	0.8374	0.5901	0.9998	0.0801	0.9488	0.2551	0.9942	0.3189	0.9315	0.9138	1		1.8275	2.6923	0.9627	1.376	0.6215	0.17	0.0596	0.2803		57	50	67	25	58	38
				X-24683	LC/MS pos early	53111								1.22782	3.08	0.63	0.63	3.09		0.1709	0.8076	0.6591	0.8444	0.0956	0.9998	0.0427	0.9488	0.809	0.9984	0.3011	0.9315	0.1769	1		1.3265	0.6488	2.0043	1.3239	1.6314	1.6287	1.9989	1.2586		100	100	100	100	100	100
				X-24729	LC/MS pos early	53158								1.14133	0.77	1.47	2.13	1.12		0.8649	0.9084	0.6342	0.8374	0.4549	0.9998	0.528	0.9954	0.6714	0.9942	0.3268	0.9315	0.8604	1		1.4144	1.3357	1.4932	1.184	1.8447	1.6143	1.0324	2.1962		100	100	100	100	100	100
				X-24753	LC/MS pos early	54687								1.51837	1.13	1.69	3.41	2.28		0.2244	0.8076	0.1331	0.7149	0.7756	0.9998	0.5129	0.9922	0.2742	0.9942	0.1495	0.9157	0.4229	1		1.0942	0.6666	1.5219	0.7102	2.0454	1.6614	0.7538	2.5689		57	50	67	75	92	100
				X-24763	LC/MS pos early	54701								0.974254	0.53	3.09	1.22	0.21		0.7353	0.8894	0.1841	0.7555	0.0686	0.9998	0.2854	0.9708	0.1136	0.9942	0.6544	0.9804	0.0495	1		1.1497	1.9013	0.3981	1.456	0.8138	1.1201	1.0107	1.2295		86	100	67	88	83	85
				X-24767	LC/MS pos early	54705								3.36313	1.12	6.48	4.17	0.72		0.2144	0.8076	0.6206	0.8374	0.3216	0.9998	0.8551	1	0.1109	0.9942	0.2346	0.9315	0.746	1		0.453	0.5268	0.3793	0.5581	1.4184	1.5235	0.5895	2.4574		29	25	33	38	50	54
				X-24797	LC/MS neg	54825								0.778969	0.58	1.14	1.07	0.55		0.5974	0.8754	0.6698	0.8462	0.7836	0.9998	0.5817	0.9954	0.8523	0.9984	0.9018	0.9953	0.6559	1		1.0071	1.3033	0.7109	1.0302	0.7614	0.7845	0.7571	0.8119		57	50	67	50	58	54
				X-24811	LC/MS pos early	54839								1.39909	1.98	1.07	0.96	1.78		0.7524	0.8961	0.3661	0.82	0.5109	0.9998	0.5046	0.9912	0.801	0.9984	0.8376	0.9938	0.3231	1		0.876	0.6306	1.1214	0.9397	1.1619	1.2256	1.2488	1.2024		100	100	100	100	92	92
				X-24829	LC/MS neg	54857								1.4228	1.58	1.31	1.16	1.39		0.3348	0.8101	0.6448	0.8374	0.9418	0.9998	0.4734	0.9912	0.5119	0.9942	0.7531	0.9938	0.7338	1		0.9203	0.7687	1.0718	0.9917	1.238	1.3094	1.2147	1.4041		100	100	100	100	100	100
				X-24837	LC/MS neg	54865								0.974426	1.49	0.75	1.12	2.24		0.7821	0.9061	0.3189	0.8125	0.3749	0.9998	0.6701	1	0.397	0.9942	0.9264	0.9953	0.2346	1		0.7234	0.4463	1.0005	0.5552	0.8731	0.7049	0.6641	0.7457		43	25	67	25	50	38
				X-24840	LC/MS neg	54868								0.989272	0.66	1.38	1.75	0.84		0.7087	0.8894	0.6775	0.847	0.3412	0.9998	0.3635	0.9721	0.6674	0.9942	0.2728	0.9315	0.7275	1		0.7737	0.843	0.7044	0.6998	0.8393	0.7654	0.5567	0.9741		43	50	33	25	42	31
				X-24853	LC/MS neg	54881								0.459676	1.86	0.3	1.45	8.9		0.8481	0.9084	0.6634	0.8449	0.5355	0.9998	0.5773	0.9954	0.7533	0.9984	0.8799	0.9953	0.5031	1		1.483	0.2995	2.6664	0.4283	1.7363	0.6817	0.5571	0.8063		29	25	33	38	50	54
				X-24854	LC/MS neg	54882								0.346203	0.29	0.41	1.24	0.89		0.3705	0.8298	0.5083	0.8374	0.5292	0.9998	0.2982	0.9708	0.8419	0.9984	0.9788	1	0.4135	1		1.4142	1.4974	1.331	0.9673	0.9364	0.4896	0.4372	0.5419		57	75	33	75	42	54
				X-24855	LC/MS neg	54883								1.4073	1.46	1.36	1.16	1.25		0.3436	0.8101	0.839	0.8624	0.9995	0.9998	0.5117	0.9912	0.4874	0.9942	0.8699	0.9938	0.8968	1		1.0108	0.8998	1.1217	1.1089	1.3243	1.4225	1.318	1.527		100	100	100	100	100	100
				X-24931	LC/MS pos early	57391								1.06767	0.37	4.51	2.46	0.2		0.8807	0.9084	0.5564	0.8374	0.1381	0.9998	0.3475	0.9708	0.2297	0.9942	0.4489	0.9315	0.188	1		1.3107	2.1796	0.4418	1.4938	1.2164	1.3994	0.8079	1.991		71	75	67	75	67	69
				X-24947	LC/MS neg	57714								0.887412	0.51	1.11	3.66	1.68		0.7032	0.8894	0.1098	0.6985	0.5641	0.9998	0.5116	0.9912	0.8853	0.9991	0.0836	0.8515	0.4926	1		0.5418	0.4048	0.6788	0.3057	0.717	0.4808	0.2065	0.7552		43	25	67	25	58	46
				X-24973	LC/MS pos early	57813								0.398117	0.31	0.68	0.7	0.32		0.3127	0.8076	0.1223	0.6985	0.1672	0.9998	0.1065	0.9488	0.7719	0.9984	0.8833	0.9953	0.0678	1		3.398	5.1545	1.6414	3.3732	1.3776	1.3528	1.5919	1.1138		100	100	100	100	92	92
				X-24977	LC/MS neg	57818								0.622654	0.09	6.89	6.89	0.09		0.8935	0.9084	0.8935	0.8629	0.1161	0.9998	0.3101	0.9708	0.2086	0.9942	0.1654	0.9157	0.3462	1		0.437	0.8051	0.069	0.437	0.2721	0.2721	0.069	0.4752		29	25	33	13	42	31
				X-24978	LC/MS neg	57819								4.68956	1.11	34.46	3.74	0.12		0.0612	0.8076	0.6259	0.8374	0.2377	0.9998	0.5964	0.9981	0.0312	0.9942	0.5634	0.9591	0.289	1		1.4589	2.6045	0.3133	2.7455	5.555	6.8416	2.8866	10.7967		100	100	100	100	100	100
				X-24980	LC/MS neg	57821								0.0251499	0.31	0.02	1.55	30.49		0.0707	0.8076	0.298	0.8055	0.7467	0.9998	0.2856	0.9708	0.1183	0.9942	0.5543	0.9547	0.3849	1		16.3102	1.0358	31.5845	0.6789	16.0416	0.4102	0.3219	0.4986		71	75	67	50	67	54
				X-24984	LC/MS pos late	57853								10.4971	19.81	1.18	0.06	1		0.0067	0.7598	0.0123	0.4823	0.0123	0.9998	0.0009	0.6867	0.8345	0.9984	0.0003	0.3397	1	1		0.136	0.136	0.136	1.4152	0.1484	1.4276	2.6944	0.1608		14	0	33	38	17	31
				X-24988	LC/MS neg	57857								1.94316	1.8	2.09	1.13	0.98		0.4422	0.839	0.7612	0.855	0.6826	0.9998	0.8018	1	0.393	0.9942	0.5655	0.9591	0.9464	1		0.9095	0.9208	0.8981	1.2905	1.3863	1.7673	1.6601	1.8745		86	100	67	63	83	69
				X-24989	LC/MS neg	57858								0.776565	0.73	0.83	0.93	0.81		0.1756	0.8076	0.6585	0.8444	0.8185	0.9998	0.2735	0.9708	0.401	0.9942	0.8629	0.9938	0.6694	1		1.2187	1.3444	1.0931	1.1627	1.0025	0.9464	0.9811	0.9118		100	100	100	100	100	100
				X-25005	LC/MS neg	61527								3.8196	1.01	6.63	6.58	1		0.4078	0.8361	0.417	0.8374	0.417	0.9998	0.9908	1	0.2376	0.9942	0.1966	0.9315	1	1		0.5704	0.5704	0.5704	0.5726	2.1765	2.1787	0.5748	3.7826		14	25	0	25	33	38
				X-25007	LC/MS neg	61529								0.654784	0.73	0.6	1.07	1.31		0.0244	0.7678	0.3497	0.8125	0.5626	0.9998	0.2118	0.9543	0.0395	0.9942	0.7674	0.9938	0.3374	1		1.1109	0.9625	1.2593	0.8334	1.005	0.7274	0.7042	0.7506		71	75	67	63	50	46
				X-25009	LC/MS pos early	61531								1.11594	1.11	1.12	0.99	0.98		0.5447	0.8716	0.7376	0.8527	0.9049	0.9998	0.6179	1	0.7217	0.9976	0.7135	0.9938	0.8907	1		1.2989	1.3102	1.2876	1.3833	1.3651	1.4495	1.4564	1.4427		100	100	100	88	92	85
				X-25010	LC/MS neg	61532								0.312228	0.19	0.55	1.54	0.52		0.0147	0.7678	0.9898	0.8773	0.3883	0.9998	0.0242	0.7592	0.1968	0.9942	0.49	0.9385	0.575	1		1.7436	2.2975	1.1897	1.3631	0.9249	0.5444	0.4288	0.6601		86	75	100	63	58	46
				X-25013	LC/MS neg	61577								0.993087	1.15	0.85	0.8	1.08		0.917	0.9084	0.5949	0.8374	0.5715	0.9998	0.6449	1	0.7353	0.9984	0.3784	0.9315	0.9824	1		1.027	0.9874	1.0667	1.0591	0.9878	1.0199	1.1309	0.909		86	75	100	75	75	69
				X-25027	LC/MS neg	61591								1.82147	2.37	1.61	1.75	2.57		0.566	0.8754	0.1534	0.7336	0.5628	0.9998	0.4305	0.9879	0.9972	1	0.4735	0.9315	0.2023	1		0.8497	0.4755	1.2239	0.8006	1.5968	1.5477	1.1256	1.9698		86	75	100	75	100	92
				X-25033	LC/MS neg	61597								2.02121	2.38	1.83	1.47	1.92		0.2912	0.8076	0.3769	0.8296	0.9656	0.9998	0.4819	0.9912	0.4201	0.9942	0.4523	0.9315	0.5896	1		1.0889	0.7464	1.4315	1.2632	2.0266	2.2009	1.78	2.6217		100	100	100	88	100	92
				X-25045	LC/MS neg	61609								0.951782	1.32	0.68	0.71	1.36		0.9864	0.9214	0.716	0.8488	0.6369	0.9998	0.7364	1	0.7397	0.9984	0.501	0.9409	0.9447	1		1.319	1.116	1.522	1.2932	1.2812	1.2554	1.4704	1.0403		71	75	67	75	75	77
				X-25053	LC/MS neg	61617								2.0086	1.4	2.33	3.15	1.89		0.2729	0.8076	0.2444	0.7692	0.6427	0.9998	0.655	1	0.2582	0.9942	0.1928	0.9315	0.6461	1		1.0928	0.7568	1.4288	0.9068	2.3809	2.195	1.0569	3.333		100	100	100	88	100	92
				X-25055	LC/MS pos early	61619								3.15039	0.89	14.28	3.24	0.2		0.4175	0.8361	0.9063	0.8629	0.3919	0.9998	0.9743	1	0.23	0.9942	0.5473	0.9537	0.5338	1		0.2028	0.3372	0.0684	0.3192	0.5225	0.6389	0.3013	0.9766		29	25	33	25	42	38
				X-25059	LC/MS neg	61623								1.45302	1.63	1.26	0.68	0.88		0.3703	0.8298	0.485	0.8374	0.514	0.9998	0.2909	0.9708	0.8552	0.9984	0.2802	0.9315	0.9763	1		0.7907	0.8407	0.7407	1.1037	0.8358	1.1489	1.3668	0.931		57	50	67	63	67	69
				X-25076	LC/MS neg	61640								0.78942	0.63	0.87	2.79	2.01		0.3493	0.8101	0.0035	0.4006	0.755	0.9998	0.3915	0.9802	0.6437	0.9942	0.008	0.4184	0.0654	1		1.1815	0.7839	1.5791	0.6383	1.4759	0.9327	0.4926	1.3728		100	100	100	88	100	92
				X-25091	LC/MS neg	61655								0.578407	0.14	2.34	3.98	0.25		0.8101	0.9084	0.779	0.8572	0.1825	0.9998	0.2769	0.9708	0.4145	0.9942	0.3835	0.9315	0.3013	1		2.8129	4.5153	1.1104	2.5846	1.8553	1.627	0.654	2.6001		71	75	67	88	92	100
				X-25095	LC/MS neg	61659								0.358173	0.27	0.72	0.66	0.24		0.302	0.8076	0.0932	0.6985	0.1133	0.9998	0.0779	0.9488	0.6632	0.9942	0.9303	0.9953	0.0427	1		3.3146	5.3269	1.3023	3.3801	1.1218	1.1872	1.4332	0.9412		100	100	100	88	100	92
				X-25096	LC/MS neg	61660								0.360533	0.3	0.57	0.53	0.28		0.1951	0.8076	0.0324	0.5362	0.199	0.9998	0.0829	0.9488	0.9929	1	0.429	0.9315	0.0324	1		3.9608	6.2063	1.7154	4.039	1.3499	1.428	1.8717	0.9844		100	100	100	100	100	100
				X-25107	LC/MS neg	61680								1.1547	1.23	1.11	1.34	1.49		0.872	0.9084	0.575	0.8374	0.6527	0.9998	0.842	1	0.6563	0.9942	0.9278	0.9953	0.5212	1		1.0213	0.8193	1.2233	0.9129	1.2876	1.1793	1.0066	1.352		43	25	67	38	58	54
				X-25109	LC/MS pos early	61682								1.22302	0.75	2.28	1.38	0.45		0.7539	0.8961	0.3426	0.8125	0.5956	0.9998	0.8803	1	0.5394	0.9942	0.7287	0.9938	0.348	1		0.9385	1.2923	0.5847	1.1282	0.9581	1.1478	0.9641	1.3316		86	100	67	100	83	92
				X-25111	LC/MS pos early	61684								1.00594	1.06	0.96	1.13	1.24		0.8159	0.9084	0.5584	0.8374	0.9374	0.9998	0.8306	1	0.9103	1	0.6809	0.9808	0.6722	1		1.0767	0.9601	1.1932	0.9893	1.1704	1.0831	1.0185	1.1476		100	100	100	100	100	100
				X-25206	LC/MS pos late	62387								2.74057	3.64	1.61	0.35	0.79		0.2999	0.8076	0.1201	0.6985	0.3356	0.9998	0.1752	0.9488	0.955	1	0.049	0.7209	0.685	1		0.7902	0.8819	0.6985	2.045	0.9109	2.1656	3.208	1.1233		100	100	100	100	75	77
				X-25212	LC/MS pos late	62393								1.603	2.25	1.12	0.68	1.35		0.8736	0.9084	0.9113	0.8629	0.4386	0.9998	0.5205	0.9954	0.6509	0.9942	0.5894	0.9599	0.5717	1		1.0849	0.9215	1.2483	1.4981	1.3258	1.7391	2.0748	1.4033		100	100	100	88	83	77
				X-25247	LC/MS neg	62464								1.16111	1.81	0.9	1.27	2.54		0.4302	0.8361	0.101	0.6985	0.1249	0.9998	0.1146	0.9488	0.5631	0.9942	0.9232	0.9953	0.0483	1		1.8	1.0172	2.5828	1.4306	2.4595	2.09	1.844	2.3361		100	100	100	100	100	100
				X-25265	LC/MS pos early	62494								1.30315	0.55	1.62	6.85	2.33		0.449	0.841	0.3013	0.8055	0.865	0.9998	0.5236	0.9954	0.666	0.9942	0.3306	0.9315	0.5769	1		1.1153	0.669	1.5616	0.5197	2.049	1.4534	0.3704	2.5364		71	75	67	50	67	54
				X-25323	LC/MS neg	62616								1.03252	0.96	1.15	0.77	0.64		0.8493	0.9084	0.4638	0.8374	0.9843	0.9998	0.8854	1	0.9012	0.9991	0.542	0.9523	0.6484	1		1.4516	1.767	1.1363	1.729	1.2214	1.4988	1.691	1.3065		100	100	100	100	92	92
				X-25326	LC/MS neg	62619								0.257291	0.33	0.23	2.13	3.02		0.1831	0.8076	0.7487	0.8527	0.9657	0.9998	0.3681	0.9721	0.3111	0.9942	0.8223	0.9938	0.8171	1		3.2403	1.6106	4.8699	1.0714	3.0026	0.8337	0.5321	1.1353		57	75	33	50	33	31
				X-25419	LC/MS pos early	62716								0.748956	0.56	1.34	0.75	0.31		0.4404	0.839	0.4478	0.8374	0.5753	0.9998	0.3628	0.9721	0.8751	0.9984	0.8697	0.9938	0.403	1		0.6947	1.0575	0.3319	0.8265	0.3884	0.5203	0.5956	0.4449		57	75	33	50	33	31
				X-25433	LC/MS neg	62749								1	1	1	1	1																	1	1	1	1	1	1	1	1		14	25	0	13	0	0
				X-25475	LC/MS neg	62899								0.706035	0.77	0.65	0.88	1.04		0.4657	0.8485	0.7188	0.8504	0.8893	0.9998	0.55	0.9954	0.6646	0.9942	0.8578	0.9938	0.7508	1		1.0372	1.0149	1.0595	0.8976	0.8719	0.7323	0.7804	0.6842		86	100	67	88	83	85
				X-25477	LC/MS neg	62901								0.853577	0.77	0.98	0.85	0.66		0.6118	0.8754	0.4958	0.8374	0.7836	0.9998	0.5915	0.9977	0.8643	0.9984	0.7399	0.9938	0.5432	1		1.4704	1.7668	1.1739	1.5607	1.1647	1.2551	1.3546	1.1555		100	100	100	88	100	92
				X-25482	LC/MS neg	62906								0.685599	0.35	1.09	2.59	0.83		0.3688	0.8298	0.5664	0.8374	0.3222	0.9998	0.1998	0.9488	0.9446	1	0.2122	0.9315	0.7849	1		1.2624	1.3805	1.1443	0.9311	1.1968	0.8655	0.4816	1.2494		86	75	100	63	92	77
				X-25485	LC/MS neg	62909								0.692464	0.45	0.86	2.76	1.45		0.1318	0.8076	0.0169	0.5152	0.1961	0.9998	0.0606	0.9488	0.8638	0.9984	0.005	0.3683	0.414	1		1.4278	1.1665	1.689	0.8465	1.57	0.9887	0.5265	1.4509		100	100	100	100	100	100
				X-25487	LC/MS neg	62911								0.664722	0.51	0.75	2.65	1.81		0.4	0.8361	0.0084	0.4823	0.83	0.9998	0.4676	0.9912	0.6439	0.9942	0.0191	0.5635	0.0954	1		1.3884	0.9874	1.7894	0.7466	1.5648	0.9229	0.5057	1.3401		100	100	100	100	100	100
				X-25490	LC/MS neg	62914								0.645747	0.63	0.66	1.3	1.23		0.2833	0.8076	0.829	0.8616	0.9769	0.9998	0.4449	0.9908	0.4423	0.9942	0.843	0.9938	0.9052	1		1.6906	1.518	1.8631	1.2339	1.5484	1.0917	0.9498	1.2337		100	100	100	100	100	100
				X-25492	LC/MS pos early	62926								0.413152	1.69	0.23	0.95	7.02		0.4988	0.8549	0.8369	0.8624	0.3701	0.9998	0.2837	0.9708	0.8688	0.9984	0.3738	0.9315	0.6562	1		6.8568	1.7105	12.0031	2.3047	7.385	2.8329	2.8988	2.767		43	50	33	75	75	92
				X-25493	LC/MS pos early	62927								1.7439	1.02	3.71	1.35	0.37		0.3574	0.8139	0.8339	0.8624	0.3634	0.9998	0.9935	1	0.1888	0.9942	0.5673	0.9591	0.4754	1		0.5041	0.7352	0.273	0.7409	0.6423	0.8791	0.7467	1.0115		14	25	0	38	42	54
				X-25495	LC/MS neg	62929								1.50166	1.18	1.54	9.71	7.43		0.7837	0.9061	0.0617	0.6384	0.5895	0.9998	0.8543	1	0.5538	0.9942	0.2555	0.9315	0.1229	1		2.9145	0.6912	5.1379	0.7541	6.537	4.3766	0.8171	7.9361		43	25	67	50	75	77
				X-25499	LC/MS neg	62933								1.43724	1.77	1.24	1.22	1.74		0.9709	0.9214	0.5974	0.8374	0.4317	0.9998	0.5701	0.9954	0.5826	0.9942	0.8313	0.9938	0.4046	1		0.4597	0.3354	0.5841	0.4649	0.6556	0.6607	0.5944	0.727		57	50	67	50	50	46
				X-25500	LC/MS neg	62934								1.96149	1.65	2.25	1.46	1.08		0.431	0.8361	0.806	0.8616	0.5097	0.9998	0.3236	0.9708	0.9237	1	0.7358	0.9938	0.5648	1		1.2412	1.1963	1.2861	1.5873	2.0885	2.4346	1.9784	2.8908		100	100	100	100	100	100
				X-25502	LC/MS neg	62936								0.958403	0.5	1.58	2.33	0.73		0.9821	0.9214	0.2762	0.7906	0.3533	0.9998	0.5304	0.9954	0.4858	0.9942	0.8915	0.9953	0.2036	1		4.6975	5.4194	3.9757	4.0611	5.1385	4.5021	2.7029	6.3013		71	50	100	75	92	92
				X-25503	LC/MS neg	62937								6.80319	1	12.6	12.6	1		0.6342	0.8754	0.6342	0.8374	0.6342	0.9998	1	1	0.4897	0.9942	0.4442	0.9315	1	1		0.0188	0.0188	0.0188	0.0188	0.1279	0.1279	0.0188	0.2369		14	0	33	0	17	8
				X-25504	LC/MS neg	62938								97.4737	1	193.89	193.89	1		0.475	0.8485	0.475	0.8374	0.475	0.9998	1	1	0.3021	0.9942	0.2541	0.9315	1	1		0.0019	0.0019	0.0019	0.0019	0.1852	0.1852	0.0019	0.3684		14	0	33	0	25	15
				X-25505	LC/MS neg	62939								7.1235	6.66	7.29	3.15	2.87		0.1323	0.8076	0.6207	0.8374	0.1778	0.9998	0.0562	0.9488	0.8993	0.9991	0.4749	0.932	0.241	1		0.8259	0.4263	1.2255	1.632	5.0772	5.8833	2.8377	8.929		86	75	100	88	100	100
				X-25506	LC/MS neg	62940								0.72266	0.66	0.77	1.43	1.23		0.5366	0.8674	0.2158	0.7692	0.9363	0.9998	0.7102	1	0.6105	0.9942	0.3433	0.9315	0.3963	1		1.0918	0.9807	1.203	0.8146	1.0662	0.789	0.6485	0.9295		86	75	100	88	100	100
				X-25507	LC/MS neg	62941								1.00151	0.81	1.29	1.06	0.66		0.6152	0.8754	0.5699	0.8374	0.7124	0.9998	0.926	1	0.5267	0.9942	0.8705	0.9938	0.5518	1		0.9259	1.1139	0.738	1.0066	0.8466	0.9273	0.8993	0.9553		71	50	100	50	83	69
				X-25508	LC/MS neg	62942								0.949647	0.85	1.11	0.87	0.66		0.5913	0.8754	0.73	0.8527	0.8933	0.9998	0.7809	1	0.6247	0.9942	0.8642	0.9938	0.7605	1		1.0347	1.2429	0.8264	1.1473	0.8699	0.9826	1.0517	0.9135		86	75	100	75	92	85
				X-25509	LC/MS neg	62943								1.32281	2.05	0.84	0.61	1.5		0.7228	0.8894	0.7879	0.8604	0.2768	0.9998	0.3221	0.9708	0.5849	0.9942	0.5006	0.9409	0.3865	1		0.9185	0.7358	1.1011	1.1208	1.0127	1.215	1.5057	0.9243		100	100	100	100	100	100
				X-25510	LC/MS neg	62944								0.353759	1.83	0.34	26.05	138.9		0.6991	0.8894	0.0588	0.6338	0.3907	0.9998	0.7414	1	0.3662	0.9942	0.3651	0.9315	0.082	1		11.3532	0.1623	22.5441	0.2296	15.1398	4.0163	0.297	7.7356		43	0	100	38	58	54
				X-25511	LC/MS neg	62945								0.391749	0.18	0.83	2.23	0.48		0.2955	0.8076	0.825	0.8616	0.7793	0.9998	0.5917	0.9977	0.3341	0.9942	0.9618	1	0.7499	1		2.9039	3.9193	1.8885	2.3116	1.7299	1.1376	0.704	1.5713		86	75	100	75	100	92
				X-25518	LC/MS neg	62962								1.48521	3.14	0.58	0.34	1.84		0.7284	0.8894	0.8138	0.8616	0.0508	0.9998	0.1097	0.9488	0.2183	0.9942	0.1496	0.9157	0.1542	1		1.0781	0.7592	1.3971	1.5728	1.1065	1.6012	2.3865	0.8158		86	75	100	88	92	92
				X-25519	LC/MS pos early	62963								1.11758	1.91	0.92	1.87	3.89		0.6954	0.8894	0.0938	0.6985	0.3358	0.9998	0.3533	0.9708	0.671	0.9942	0.5322	0.9484	0.0966	1		1.2519	0.5119	1.992	0.7437	1.9074	1.3991	0.9756	1.8227		100	100	100	100	100	100
				X-25520	LC/MS pos early	62964								0.566354	0.96	0.41	1.06	2.5		0.4889	0.8549	0.5366	0.8374	0.4574	0.9998	0.9712	1	0.2999	0.9942	0.9176	0.9953	0.3885	1		2.8461	1.6241	4.0682	1.5948	2.8632	1.6119	1.5656	1.6582		100	100	100	100	100	100
				X-25521	LC/MS pos early	62965								1.54416	0.88	2.31	2.28	0.87		0.4948	0.8549	0.642	0.8374	0.4869	0.9998	0.993	1	0.3193	0.9942	0.352	0.9315	0.8817	1		0.9964	1.0661	0.9267	1.0018	1.5331	1.5386	0.9376	2.1396		100	100	100	100	100	100
				X-25522	LC/MS pos early	62966								0.194465	0.13	0.23	3.54	2.04		0.0732	0.8076	0.8263	0.8616	0.3485	0.9998	0.065	0.9488	0.4979	0.9942	0.3507	0.9315	0.6429	1		3.8881	2.5608	5.2154	1.447	3.1972	0.7561	0.3333	1.1789		100	100	100	100	83	85
				X-25531	LC/MS neg	63030								0.505239	0.3	0.69	2.61	1.14		0.3193	0.8076	0.0165	0.5152	0.5925	0.9998	0.2954	0.9708	0.73	0.9976	0.0191	0.5635	0.1941	1		1.4698	1.374	1.5656	0.8927	1.3197	0.7426	0.4115	1.0737		86	75	100	63	100	85
				X-25532	LC/MS neg	63031								0.789401	0.51	0.94	3.44	1.85		0.2479	0.8076	0.0029	0.4006	0.2606	0.9998	0.1236	0.9488	0.981	1	0.0016	0.3397	0.1544	1		1.085	0.7617	1.4082	0.5737	1.3678	0.8565	0.3856	1.3275		100	100	100	100	100	100
				X-25533	LC/MS neg	63032								0.903363	0.65	1.04	2.96	1.83		0.5194	0.862	0.0115	0.4823	0.4922	0.9998	0.3633	0.9721	0.9748	1	0.011	0.4792	0.1901	1		1.0824	0.7651	1.3996	0.6294	1.4308	0.9778	0.4937	1.4619		100	100	100	100	100	100
				X-25534	LC/MS neg	63033								0.549744	0.32	0.83	2.11	0.82		0.0477	0.8076	0.1639	0.7336	0.0723	0.9998	0.0129	0.6867	0.8744	0.9984	0.0147	0.535	0.771	1		1.5791	1.7333	1.4248	1.1456	1.3016	0.8681	0.5579	1.1784		100	100	100	100	100	100
				X-25535	LC/MS neg	63034								0.821094	0.61	0.93	3.04	1.98		0.3224	0.8076	0.0014	0.4006	0.5385	0.9998	0.2736	0.9708	0.7785	0.9984	0.0022	0.3397	0.0558	1		0.9491	0.6367	1.2615	0.5111	1.2173	0.7793	0.3855	1.1731		86	75	100	50	100	77
				X-25536	LC/MS neg	63035								1.01763	0.64	1.25	3.28	1.67		0.7182	0.8894	0.02	0.525	0.4654	0.9998	0.4547	0.9912	0.785	0.9984	0.016	0.5448	0.2598	1		0.9017	0.6755	1.1279	0.5523	1.267	0.9176	0.4291	1.4061		86	75	100	75	92	85
				X-25537	LC/MS neg	63036								1.03111	0.64	1.29	3.08	1.51		0.9171	0.9084	0.0696	0.6604	0.3918	0.9998	0.5078	0.9912	0.5803	0.9942	0.0364	0.68	0.508	1		0.9065	0.721	1.092	0.5896	1.2517	0.9347	0.4581	1.4114		71	50	100	38	92	69
				X-25539	LC/MS neg	63041								0.145264	0.03	1.59	3.8	0.08		0.2548	0.8076	0.6364	0.8374	0.4302	0.9998	0.1902	0.9488	0.7898	0.9984	0.7945	0.9938	0.4234	1		4.1848	7.7657	0.6039	4.0095	0.7832	0.6079	0.2532	0.9625		43	50	33	38	25	23
				X-25546	LC/MS pos early	63081								0.319116	0.22	0.75	0.73	0.22		0.1135	0.8076	0.0491	0.5908	0.212	0.9998	0.0578	0.9488	0.7884	0.9984	0.5121	0.9443	0.0444	1		3.3784	5.542	1.2149	3.3937	1.0629	1.0781	1.2453	0.9109		86	100	67	100	92	100
				X-25551	LC/MS pos early	63086								0.724019	0.42	1.29	1.61	0.53		0.6835	0.8894	0.8752	0.8629	0.2776	0.9998	0.3059	0.9708	0.6125	0.9942	0.3148	0.9315	0.5481	1		1.045	1.3652	0.7248	0.9722	0.8294	0.7566	0.5792	0.934		43	50	33	38	58	54
				X-25563	LC/MS pos early	63098								0.928669	0.48	1.75	2.04	0.55		0.7056	0.8894	0.9402	0.8674	0.0774	0.9998	0.1381	0.9488	0.2897	0.9942	0.1625	0.9157	0.2296	1		1.2477	1.6057	0.8898	1.1844	1.2221	1.1587	0.763	1.5544		100	100	100	100	100	100
				X-25564	LC/MS neg	63099								0.812712	0.86	0.78	1.09	1.2		0.585	0.8754	0.9326	0.8667	0.9717	0.9998	0.7249	1	0.6711	0.9942	0.9226	0.9953	0.9751	1		1.2067	1.098	1.3154	1.0185	1.1689	0.9807	0.9389	1.0225		100	100	100	100	100	100
				X-25603	LC/MS pos early	63212								2.68473	0.58	7.79	5.59	0.41		0.4313	0.8361	0.7013	0.8476	0.2705	0.9998	0.8214	1	0.1747	0.9942	0.2333	0.9315	0.6393	1		0.6569	0.9298	0.3841	0.7326	1.6879	1.7636	0.5355	2.9917		29	25	33	38	75	77
				X-25656	LC/MS pos early	63332								0.169377	0.06	7.92	1.7	0.01		0.6274	0.8754	0.0947	0.6985	0.1972	0.9998	0.2241	0.9643	0.544	0.9942	0.7323	0.9938	0.0644	1		28.3196	55.8755	0.7636	29.7117	3.4046	4.7967	3.5479	6.0455		100	100	100	100	100	100
				X-25661	LC/MS neg	63388								0.82616	0.67	0.94	2.01	1.43		0.815	0.9084	0.2577	0.7752	0.4507	0.9998	0.4972	0.9912	0.7015	0.9942	0.135	0.9157	0.8021	1		1.1384	0.9368	1.3401	0.7811	1.2978	0.9405	0.6253	1.2556		43	50	33	50	75	77
				X-25666	LC/MS neg	63393								2.20989	2.92	1.83	1.19	1.89		0.9574	0.9211	0.5128	0.8374	0.7549	0.9998	0.8587	1	0.7899	0.9984	0.7796	0.9938	0.5389	1		0.5341	0.37	0.6981	0.7249	0.9895	1.1803	1.0798	1.2808		57	50	67	38	58	46
				X-25668	LC/MS neg	63395								2.82566	3.56	2.03	0.53	0.92		0.6135	0.8754	0.8824	0.8629	0.7634	0.9998	0.5803	0.9954	0.8808	0.9991	0.9013	0.9953	0.7753	1		0.717	0.7459	0.6881	1.7001	1.0429	2.026	2.6542	1.3978		57	50	67	50	58	54
				X-25670	LC/MS neg	63439								1.16991	1.15	1.19	0.98	0.95		0.4408	0.839	0.7172	0.8494	0.8131	0.9998	0.7104	1	0.4634	0.9942	0.9187	0.9953	0.7035	1		1.007	1.0306	0.9834	1.1094	1.0757	1.1781	1.1881	1.168		100	100	100	100	100	100
				X-25676	LC/MS neg	63445								0.738635	0.64	0.82	1.59	1.25		0.411	0.8361	0.2518	0.7692	0.5224	0.9998	0.3185	0.9708	0.8915	0.9991	0.1556	0.9157	0.7381	1		1.4826	1.318	1.6472	1.0812	1.4965	1.0951	0.8444	1.3458		100	100	100	100	100	100
				X-25681	LC/MS neg	63450								1.16152	1.2	1.14	1.41	1.48		0.462	0.8452	0.2059	0.7692	0.9927	0.9998	0.6073	0.9981	0.5949	0.9942	0.3054	0.9315	0.4107	1		0.9943	0.8003	1.1882	0.8792	1.2699	1.1549	0.9581	1.3516		100	100	100	100	100	100
				X-25690	LC/MS neg	63459								0.759196	0.91	0.7	1.82	2.38		0.6921	0.8894	0.0159	0.5127	0.5168	0.9998	0.8605	1	0.4484	0.9942	0.1198	0.8928	0.0484	1		1.1798	0.6977	1.662	0.6663	1.4091	0.8957	0.635	1.1563		71	50	100	75	100	100
				X-25698	LC/MS neg	63467								0.498492	0.28	0.75	2.33	0.86		0.2049	0.8076	0.9934	0.8784	0.2697	0.9998	0.1096	0.9488	0.8983	0.9991	0.3655	0.9315	0.4806	1		1.4588	1.5687	1.349	1.003	1.183	0.7272	0.4374	1.0171		57	75	33	50	58	54
				X-25701	LC/MS neg	63470								0.650336	0.56	0.71	2.01	1.58		0.0287	0.7678	0.0231	0.525	0.4045	0.9998	0.0397	0.9421	0.2762	0.9942	0.015	0.535	0.3076	1		1.3676	1.0591	1.6762	0.8254	1.4316	0.8894	0.5917	1.187		100	100	100	100	100	100
				X-25702	LC/MS neg	63471								0.705421	0.62	0.75	2.18	1.81		0.4551	0.845	0.2272	0.7692	0.4547	0.9998	0.3082	0.9708	0.9997	1	0.1215	0.8981	0.7594	1		1.568	1.1168	2.0192	0.9063	1.7678	1.1061	0.6957	1.5165		100	100	100	88	100	92
				X-25706	LC/MS neg	63475								0.904031	0.8	0.96	2.04	1.7		0.6574	0.8852	0.0643	0.6384	0.9492	0.9998	0.7272	1	0.7814	0.9984	0.1166	0.8928	0.239	1		1.042	0.7714	1.3125	0.6957	1.2883	0.942	0.6199	1.2641		100	100	100	88	92	85
				X-25707	LC/MS neg	63476								0.959477	0.83	1.06	1.74	1.37		0.7393	0.8918	0.1771	0.743	0.7307	0.9998	0.6423	1	0.9933	1	0.1734	0.9254	0.5091	1		0.8341	0.7043	0.9639	0.6438	0.9906	0.8003	0.5833	1.0173		57	50	67	50	67	62
				X-25708	LC/MS neg	63477								0.922698	0.71	1.06	2.28	1.52		0.786	0.9063	0.0085	0.4823	0.609	0.9998	0.5911	0.9977	0.8601	0.9984	0.0117	0.494	0.1347	1		0.9741	0.7725	1.1757	0.6604	1.2125	0.8988	0.5484	1.2493		100	100	100	75	100	85
				X-25709	LC/MS neg	63478								0.610011	0.37	0.82	2.46	1.12		0.0722	0.8076	0.0366	0.5433	0.1039	0.9998	0.0233	0.7592	0.8857	0.9991	0.0051	0.3683	0.7281	1		1.2067	1.1401	1.2733	0.7825	1.1603	0.7361	0.425	1.0473		100	100	100	100	100	100
				X-25710	LC/MS neg	63479								0.881691	0.84	0.91	1.66	1.53		0.6472	0.8813	0.0465	0.5775	0.9793	0.9998	0.7393	1	0.7525	0.9984	0.0965	0.8655	0.194	1		1.1377	0.9003	1.3752	0.8267	1.3141	1.0031	0.7531	1.2531		100	100	100	88	100	92
				X-25713	LC/MS neg	63482								0.986833	0.98	0.99	0.6	0.59		0.9029	0.9084	0.1948	0.7635	0.6419	0.9998	0.6866	1	0.8019	0.9984	0.4874	0.9385	0.2621	1		1.2152	1.525	0.9055	1.5131	0.9014	1.1992	1.5013	0.8972		100	100	100	100	100	100
				X-25716	LC/MS neg	63485								0.73523	0.57	0.85	2.12	1.44		0.2845	0.8076	0.0251	0.525	0.5394	0.9998	0.2507	0.9708	0.731	0.9976	0.0235	0.6162	0.2581	1		1.1848	0.9723	1.3973	0.7651	1.2908	0.8711	0.5579	1.1843		100	100	100	88	100	92
				X-25717	LC/MS neg	63486								0.85962	1.01	0.78	1.47	1.92		0.9618	0.9214	0.1225	0.6985	0.8328	0.9998	0.9106	1	0.8502	0.9984	0.2691	0.9315	0.2576	1		0.9688	0.6642	1.2734	0.669	1.1326	0.8328	0.6738	0.9918		71	50	100	50	100	85
				X-25758	LC/MS neg	63527								1.14795	1.17	1.12	0.79	0.82		0.4834	0.852	0.2985	0.8055	0.7751	0.9998	0.773	1	0.4731	0.9942	0.5352	0.9484	0.398	1		0.9902	1.0877	0.8927	1.1785	0.9484	1.1367	1.2693	1.004		100	100	100	100	100	100
				X-25771	LC/MS neg	63540								1.29211	0.86	2.34	1.14	0.42		0.568	0.8754	0.5976	0.8374	0.6984	0.9998	0.8986	1	0.4864	0.9942	0.9087	0.9953	0.5611	1		1.1564	1.6344	0.6784	1.516	1.1345	1.4942	1.3976	1.5907		57	50	67	50	58	54
				X-25779	LC/MS neg	63548								0.760776	0.77	0.75	0.6	0.61		0.4258	0.8361	0.2506	0.7692	0.9772	0.9998	0.569	0.9954	0.5736	0.9942	0.361	0.9315	0.4486	1		1.4476	1.803	1.0922	1.5916	0.9573	1.1013	1.3802	0.8224		100	100	100	88	92	85
				X-25781	LC/MS neg	63550								0.900333	0.59	1.2	2.12	1.05		0.5042	0.86	0.4805	0.8374	0.6045	0.9998	0.4173	0.9826	0.9115	1	0.3269	0.9315	0.9033	1		1.5632	1.5282	1.5983	1.2146	1.7561	1.4074	0.901	1.9138		86	75	100	88	100	100
				X-25785	LC/MS neg	63555								0.609256	0.58	0.67	0.64	0.56		0.1872	0.8076	0.4905	0.8374	0.9423	0.9998	0.3834	0.9767	0.3058	0.9942	0.5375	0.9501	0.6929	1		1.3116	1.685	0.9382	1.3293	0.7814	0.7991	0.9737	0.6246		86	75	100	88	75	77
				X-25793	LC/MS pos early	63563								1.39875	1.24	1.61	0.93	0.72		0.0775	0.8076	0.3448	0.8125	0.7762	0.9998	0.2885	0.9708	0.1323	0.9942	0.5877	0.9599	0.4336	1		0.802	0.9325	0.6715	1.0463	0.8775	1.1218	1.1602	1.0834		86	75	100	88	100	100
				X-25832	LC/MS pos early	63638								0.104266	0.71	0.08	2.59	23.44		0.3001	0.8076	0.1009	0.6985	0.5407	0.9998	0.7632	1	0.2342	0.9942	0.3803	0.9315	0.1517	1		6.001	0.491	11.5111	0.4199	6.2069	0.6257	0.3488	0.9027		29	25	33	13	50	38
				X-25833	LC/MS pos early	63639								0.794102	0.98	0.63	0.75	1.16		0.8694	0.9084	0.6603	0.8444	0.6165	0.9998	0.8163	1	0.628	0.9942	0.4496	0.9315	0.9685	1		1.6751	1.5519	1.7984	1.5375	1.4678	1.3302	1.5232	1.1371		86	75	100	88	100	100
				X-25837	LC/MS neg	63703								0.51251	0.89	0.39	1.31	3.03		0.5934	0.8754	0.2951	0.8055	0.1597	0.9998	0.5319	0.9954	0.1605	0.9942	0.7552	0.9938	0.1233	1		2.0464	1.0145	3.0784	0.9606	2.1346	1.0488	0.9067	1.1908		86	75	100	88	92	92
				X-25838	LC/MS neg	63704								1.59978	1.1	2	2.31	1.27		0.6032	0.8754	0.516	0.8374	0.7347	0.9998	0.9002	1	0.5326	0.9942	0.4265	0.9315	0.8415	1		1.1014	0.9713	1.2316	1.0175	1.8458	1.762	1.0638	2.4601		86	75	100	88	100	100
				X-25853	LC/MS pos early	63719								1.51215	0.91	2.37	1.8	0.7		0.2433	0.8076	0.739	0.8527	0.1081	0.9998	0.7405	1	0.0496	0.9942	0.1184	0.8928	0.3987	1		0.6834	0.8054	0.5614	0.7711	0.9457	1.0334	0.7368	1.3299		71	75	67	75	83	85
				X-25854	LC/MS pos early	63720								2.9102	1.47	7.53	1.59	0.31		0.3368	0.8101	0.8969	0.8629	0.4379	0.9998	0.8953	1	0.2115	0.9942	0.5987	0.9613	0.5635	1		0.2138	0.3261	0.1015	0.4032	0.4328	0.6222	0.4802	0.7641		14	25	0	25	42	46
				X-25855	LC/MS pos early	63721								2.99367	3.18	2.69	0.52	0.61		0.0332	0.8076	0.0926	0.6985	0.7428	0.9998	0.0858	0.9488	0.165	0.9942	0.1054	0.8759	0.3683	1		0.7739	0.9614	0.5863	2.0084	1.0822	2.3168	3.0555	1.5782		100	100	100	100	100	100
				X-25936	LC/MS pos early	63840								1.64703	1.24	2.45	1	0.51		0.5571	0.8754	0.2301	0.7692	0.7927	0.9998	0.8222	1	0.5364	0.9942	0.4394	0.9315	0.3494	1		0.9046	1.2011	0.608	1.3457	1.0487	1.4899	1.4903	1.4895		100	100	100	100	100	100
				X-25940	LC/MS neg	63891								0.946565	1.14	0.73	0.56	0.87		0.9819	0.9214	0.744	0.8527	0.5136	0.9998	0.6413	1	0.6446	0.9942	0.4304	0.9315	0.8335	1		1.6113	1.7246	1.4981	1.8424	1.2941	1.5252	1.9603	1.0902		100	100	100	100	100	100
				X-25941	LC/MS neg	63892								1.47816	0.86	2.56	1.72	0.57		0.4001	0.8361	0.8278	0.8616	0.8246	0.9998	0.4648	0.9912	0.6476	0.9942	0.9973	1	0.7801	1		0.8424	1.07	0.6148	0.9932	1.0944	1.2452	0.9164	1.5741		57	50	67	63	75	77
				X-25942	LC/MS neg	63893								2.06453	1.71	2.43	1.38	0.97		0.4389	0.839	0.8889	0.8629	0.9326	0.9998	0.6332	1	0.5304	0.9942	0.8561	0.9938	0.972	1		0.7733	0.7841	0.7624	1.0617	1.3081	1.5965	1.3392	1.8538		43	25	67	38	50	46
				X-25943	LC/MS neg	63894								0.548817	2.83	0.4	2.24	15.71		0.8245	0.9084	0.0279	0.5251	0.0901	0.9998	0.2942	0.9708	0.1586	0.9942	0.6259	0.9747	0.0162	1		1.8928	0.2265	3.559	0.4342	2.4974	1.0388	0.6418	1.4358		57	25	100	50	83	77
				X-25944	LC/MS neg	63895								1.41583	0.89	2.25	1.59	0.63		0.6641	0.8857	0.9471	0.8674	0.9485	0.9998	0.7989	1	0.716	0.9976	0.9988	1	0.9336	1		1.3181	1.6153	1.0209	1.5275	1.6568	1.8662	1.4396	2.2928		100	100	100	100	100	100
				X-25945	LC/MS neg	63896								3.02672	2.06	12.5	0.62	0.1		0.0533	0.8076	0.9047	0.8629	0.9762	0.9998	0.1652	0.9488	0.1535	0.9942	0.9037	0.9953	0.9544	1		0.4828	0.8764	0.0892	1.3418	0.6023	1.4613	1.8072	1.1153		71	50	100	75	83	85
				X-25946	LC/MS neg	63897								1.1976	2.29	0.42	0.26	1.41		0.7051	0.8894	0.7357	0.8527	0.0677	0.9998	0.2954	0.9708	0.1068	0.9942	0.081	0.8515	0.3192	1		0.958	0.7948	1.1212	1.3069	0.7984	1.1473	1.819	0.4756		86	75	100	88	92	92
				X-25947	LC/MS neg	63898								1.93946	2.77	1.28	0.58	1.25		0.4193	0.8361	0.4405	0.8374	0.6648	0.9998	0.3956	0.9802	0.7812	0.9984	0.781	0.9938	0.4444	1		0.7466	0.6632	0.8299	1.2497	0.9448	1.448	1.8362	1.0598		100	100	100	100	100	100
				X-25948	LC/MS pos early	63899								0.7847	0.69	0.92	0.94	0.71		0.4037	0.8361	0.9916	0.8777	0.5101	0.9998	0.3083	0.9708	0.895	0.9991	0.5992	0.9613	0.6691	1		1.2745	1.4913	1.0576	1.2615	1.0131	1.0001	1.0316	0.9686		100	100	100	100	100	100
				X-25949	LC/MS pos early	63900								2.00938	0.75	24.46	1.83	0.06		0.1757	0.8076	0.8403	0.8629	0.2477	0.9998	0.8834	1	0.0746	0.9942	0.4329	0.9315	0.3848	1		3.9334	7.4486	0.4182	6.5129	5.3242	7.9037	5.5773	10.2302		100	100	100	100	100	100
				X-25950	LC/MS pos early	63901								0.774765	1.08	0.47	0.44	1.01		0.5579	0.8754	0.4095	0.8374	0.9688	0.9998	0.706	1	0.6481	0.9942	0.4838	0.9385	0.6146	1		2.0836	2.0726	2.0946	2.1585	1.5394	1.6143	2.2444	0.9842		100	100	100	100	100	100
				X-25951	LC/MS pos early	63902								2.92527	3.96	2.5	1.54	2.45		0.2553	0.8076	0.6458	0.8374	0.783	0.9998	0.3307	0.9708	0.5212	0.9942	0.8808	0.9953	0.6404	1		0.4938	0.2866	0.701	0.7112	1.2272	1.4445	1.1357	1.7533		86	75	100	88	92	92
				X-25952	LC/MS pos early	63903								2.34328	0.3	4.86	13.4	0.81		0.6257	0.8754	0.2391	0.7692	0.2341	0.9998	0.2508	0.9708	0.5975	0.9942	0.0641	0.8207	0.9932	1		1.3039	1.4381	1.1697	0.9313	3.428	3.0554	0.4245	5.6862		86	75	100	88	92	92
				X-25953	LC/MS pos early	63904								0.590566	0.52	0.67	1.15	0.9		0.4171	0.8361	0.7581	0.855	0.6699	0.9998	0.3967	0.9802	0.775	0.9984	0.554	0.9547	0.9396	1		1.7341	1.8216	1.6465	1.3868	1.3714	1.0241	0.9519	1.0963		100	100	100	88	100	92
				X-25954	LC/MS pos early	63905								0.349049	0.05	14.04	6.76	0.02		0.9059	0.9084	0.9543	0.8677	0.0679	0.9998	0.1726	0.9488	0.1992	0.9942	0.1441	0.9157	0.2179	1		3.8814	7.5946	0.1681	3.9719	1.2642	1.3548	0.3493	2.3603		86	75	100	63	83	69
				X-25955	LC/MS pos early	63906								1.37222	1.31	1.46	0.74	0.67		0.4712	0.8485	0.2503	0.7692	0.7799	0.9998	0.4925	0.9912	0.7451	0.9984	0.2497	0.9315	0.5712	1		1.1367	1.3642	0.9092	1.5775	1.119	1.5598	1.7908	1.3288		100	100	100	100	100	100
				X-25957	LC/MS pos early	63908								2.5062	0.35	9.01	8.62	0.33		0.991	0.9214	0.8276	0.8616	0.0924	0.9998	0.2336	0.9643	0.2133	0.9942	0.1234	0.9024	0.3332	1		1.1134	1.6715	0.5553	1.126	2.7779	2.7904	0.5804	5.0005		100	100	100	100	92	92
				X-25958	LC/MS pos early	63909								1.36248	1.57	1.21	1.01	1.31		0.3834	0.8361	0.6457	0.8374	0.3066	0.9998	0.9138	1	0.1739	0.9942	0.6411	0.9775	0.3464	1		1.098	0.9526	1.2434	1.2224	1.3716	1.496	1.4921	1.4998		100	100	100	100	100	100
				X-26020	LC/MS pos early	64019								3.41591	3.36	3.48	0.95	0.91		0.0659	0.8076	0.6	0.8374	0.7387	0.9998	0.1315	0.9488	0.2509	0.9942	0.4897	0.9385	0.9026	1		0.3859	0.403	0.3687	0.8781	0.8259	1.3182	1.3532	1.2831		14	25	0	50	42	62
				X-26035	LC/MS pos early	64248								4.30795	2.18	5.81	3.78	1.42		0.315	0.8076	0.438	0.8374	0.6631	0.9998	0.6888	1	0.2963	0.9942	0.3312	0.9315	0.8258	1		0.604	0.4999	0.7082	0.7943	2.4118	2.602	1.0887	4.1154		29	25	33	50	67	77
				X-26058	LC/MS pos early	64282								1.72911	1.3	2.37	1.22	0.67		0.2811	0.8076	0.8494	0.8629	0.3931	0.9998	0.8722	1	0.1656	0.9942	0.3994	0.9315	0.6689	1		0.6918	0.8285	0.555	0.9524	0.9355	1.1962	1.0763	1.3161		86	100	67	100	92	100
				X-26062	LC/MS neg	64337								3.63314	1.28	5.99	4.67	1		0.3738	0.8357	0.6071	0.8374	0.6071	0.9998	0.7919	1	0.3097	0.9942	0.4089	0.9315	1	1		0.1044	0.1044	0.1044	0.119	0.3646	0.3793	0.1337	0.6249		14	0	33	13	25	23
				X-26092	LC/MS neg	64367								1.22473	0.44	2.78	3.14	0.5		0.756	0.8961	0.4861	0.8374	0.0188	0.9998	0.1339	0.9488	0.0485	0.9942	0.0161	0.5448	0.2441	1		0.8272	1.1019	0.5525	0.7956	1.0447	1.0131	0.4892	1.537		71	75	67	50	92	77
				X-26093	LC/MS neg	64368								1.56819	1.16	2.18	1.26	0.67		0.9241	0.9084	0.995	0.8786	0.7075	0.9998	0.8471	1	0.7317	0.9976	0.7576	0.9938	0.8141	1		1.2216	1.4628	0.9804	1.579	1.5582	1.9157	1.6952	2.1361		100	100	100	100	92	92
				X-26094	LC/MS neg	64369								1.85756	1.28	2.3	2.36	1.32		0.9111	0.9084	0.7954	0.861	0.7135	0.9998	0.8603	1	0.7272	0.9976	0.9302	0.9953	0.6905	1		1.501	1.2954	1.7066	1.4775	2.8117	2.7882	1.6596	3.9168		100	100	100	100	100	100
				X-26097	LC/MS pos early	64372								0.938389	0.61	1.76	1.15	0.4		0.7592	0.8967	0.2527	0.7692	0.1589	0.9998	0.2365	0.9683	0.408	0.9942	0.8169	0.9938	0.1094	1		1.1037	1.5784	0.629	1.271	0.8684	1.0357	0.9635	1.1078		100	100	100	100	83	85
				X-26099	LC/MS neg	64374								0.128471	0.15	0.11	1	1.32		0.0479	0.8076	0.8309	0.8616	0.8309	0.9998	0.2044	0.9488	0.1048	0.9942	1	1	0.7859	1		0.6266	0.5402	0.7129	0.3104	0.3967	0.0805	0.0805	0.0805		43	50	33	25	17	8
				X-26103	LC/MS neg	64378								0.0811783	0.13	0.06	1	2.21		0.0579	0.8076	0.6603	0.8444	0.6603	0.9998	0.2892	0.9708	0.0882	0.9942	1	1	0.5768	1		0.4447	0.2771	0.6123	0.1566	0.3242	0.0361	0.0361	0.0361		29	25	33	13	17	8
				X-26108	LC/MS pos late	64397								1	1	1	1	1																	1	1	1	1	1	1	1	1		0	0	0	0	8	8
				X-26125	LC/MS pos early	64646								1.35408	3.37	1.15	3.41	9.99		0.6605	0.8856	0.1	0.6985	0.6018	0.9998	0.5103	0.9912	0.9515	1	0.341	0.9315	0.1665	1		1.0845	0.1973	1.9718	0.4315	2.1215	1.4685	0.6657	2.2712		71	50	100	50	83	69
				X-26126	LC/MS pos early	64647								1.9017	1.33	2.66	1.52	0.76		0.4442	0.839	0.8092	0.8616	0.9052	0.9998	0.6546	1	0.5186	0.9942	0.9211	0.9953	0.8186	1		0.7701	0.8769	0.6633	1.0201	1.2145	1.4645	1.1633	1.7657		86	100	67	100	67	77
				X-26127	LC/MS neg	64650								1.45513	1.61	1.34	1.07	1.29		0.1398	0.8076	0.8898	0.8629	0.7801	0.9998	0.2248	0.9643	0.3685	0.9942	0.9093	0.9953	0.7905	1		0.5884	0.5138	0.6631	0.6701	0.7745	0.8562	0.8264	0.8859		57	50	67	75	75	85
				X-26162	LC/MS neg	64799								0.110396	0.04	0.21	3.34	0.67		0.0899	0.8076	0.741	0.8527	0.9998	0.9998	0.2326	0.9643	0.2069	0.9942	0.789	0.9938	0.8334	1		2.299	2.7468	1.8511	1.4319	1.1209	0.2538	0.1169	0.3908		71	50	100	38	58	38
				X-26217	LC/MS pos late	64947								2.32916	3.56	1.52	0.65	1.53		0.1114	0.8076	0.5456	0.8374	0.4216	0.9998	0.1039	0.9488	0.5396	0.9942	0.869	0.9938	0.3725	1		0.6784	0.5373	0.8195	1.2245	1.034	1.5801	1.9117	1.2485		100	100	100	100	100	100
				X-26224	LC/MS pos late	64962								1.2479	1.52	1.02	0.78	1.16		0.4438	0.839	0.8834	0.8629	0.2143	0.9998	0.1725	0.9488	0.7161	0.9976	0.2607	0.9315	0.4772	1		1.1182	1.037	1.1994	1.3043	1.2094	1.3954	1.5715	1.2193		100	100	100	100	100	100
				X-26225	LC/MS pos late	64963								0.626592	0.93	0.3	0.31	0.93		0.2604	0.8076	0.8158	0.8616	0.4841	0.9998	0.7609	1	0.1888	0.9942	0.4521	0.9315	0.7642	1		2.764	2.8575	2.6706	2.7546	1.7414	1.7319	2.6518	0.8121		86	75	100	75	92	85
				X-26240	LC/MS pos early	65003								1.08008	0.99	1.18	1.06	0.89		0.9506	0.9196	0.9752	0.876	0.9776	0.9998	0.9814	1	0.9477	1	0.9619	1	0.9985	1		1.5223	1.607	1.4377	1.6015	1.5651	1.6442	1.596	1.6924		100	100	100	100	100	100
				X-26243	LC/MS pos early	65006								1.55378	1.76	1.29	0.57	0.78		0.2911	0.8076	0.1458	0.7278	0.6173	0.9998	0.2874	0.9708	0.6769	0.9942	0.1188	0.8928	0.5258	1		0.913	1.0255	0.8004	1.4138	0.9178	1.4186	1.802	1.0352		100	100	100	100	100	100
				X-26249	LC/MS neg	65013								1.82412	3.32	1.26	1.01	2.66		0.6491	0.8813	0.5707	0.8374	0.4323	0.9998	0.396	0.9802	0.8064	0.9984	0.857	0.9938	0.3915	1		0.5589	0.3053	0.8124	0.6601	0.9183	1.0195	1.0149	1.0242		57	50	67	63	67	69
				X-26250	LC/MS neg	65014								1.31697	0.31	3.68	5.09	0.43		0.496	0.8549	0.6444	0.8374	0.4132	0.9998	0.3066	0.9708	0.9181	1	0.305	0.9315	0.817	1		0.9556	1.3394	0.5719	0.8765	1.3376	1.2585	0.4136	2.1034		86	75	100	50	83	62
				X-26254	LC/MS neg	65018								1.01264	1.42	0.53	0.31	0.84		0.4608	0.8452	0.0749	0.6635	0.3584	0.9998	0.2595	0.9708	0.8916	0.9991	0.0349	0.68	0.55	1		1.5263	1.6632	1.3893	2.0116	1.0602	1.5456	2.3601	0.7311		57	75	33	88	75	92
				X-26260	LC/MS neg	65024								0.676697	1.06	0.5	1.01	2.16		0.4137	0.8361	0.1238	0.6985	0.231	0.9998	0.7838	1	0.1482	0.9942	0.763	0.9938	0.0866	1		1.5818	1.0021	2.1616	1.0336	1.6186	1.0704	1.0651	1.0757		86	75	100	88	92	92
				X-26262	LC/MS pos early	65026								1.1534	0.88	1.42	1.64	1.02		0.8655	0.9084	0.4352	0.8374	0.4868	0.9998	0.7156	1	0.5285	0.9942	0.2391	0.9315	0.9558	1		0.779	0.773	0.785	0.7267	0.9508	0.8985	0.6804	1.1166		29	25	33	25	42	38
				X-26263	LC/MS pos early	65027								0.988931	1.06	0.93	1.04	1.18		0.6588	0.8852	0.7005	0.8476	0.7317	0.9998	0.9455	1	0.5685	0.9942	0.5577	0.9547	0.9787	1		0.9305	0.8518	1.0092	0.8771	0.9736	0.9202	0.9024	0.938		100	100	100	100	100	100
				X-26265	LC/MS neg	65029								1.72937	1.78	1.7	1.82	1.91		0.4322	0.8361	0.2073	0.7692	0.968	0.9998	0.6063	0.9981	0.5459	0.9942	0.2895	0.9315	0.4297	1		1.1307	0.7781	1.4834	1.0828	2.0033	1.9554	1.3876	2.5232		100	100	100	100	100	100
				X-26266	LC/MS pos late	65030								5.01054	7.31	3.53	0.75	1.56		0.0282	0.7678	0.7406	0.8527	0.444	0.9998	0.043	0.9488	0.2526	0.9942	0.3779	0.9315	0.7793	1		0.5691	0.4453	0.693	1.8503	1.5703	2.8515	3.2553	2.4477		86	100	67	100	92	100
				X-26267	LC/MS neg	65031								1.02919	1.12	0.77	0.23	0.34		0.6109	0.8754	0.2395	0.7692	0.3914	0.9998	0.3504	0.9708	0.7952	0.9984	0.1084	0.8759	0.8311	1		2.1275	3.1776	1.0775	3.3648	0.9523	2.1896	3.552	0.8271		100	100	100	100	100	100
				X-26268	LC/MS neg	65032								1.41079	1.72	1.1	0.65	1.01		0.9231	0.9084	0.9186	0.8629	0.4907	0.9998	0.682	1	0.5663	0.9942	0.5222	0.9484	0.7069	1		0.7415	0.7361	0.747	1.0027	0.785	1.0461	1.2692	0.823		100	100	100	100	83	85
				X-26271	LC/MS neg	65036								0.707998	0.24	1.28	4.37	0.82		0.2208	0.8076	0.0476	0.5841	0.1269	0.9998	0.0649	0.9488	0.8096	0.9984	0.0078	0.4184	0.7377	1		1.2928	1.4176	1.1681	0.8794	1.3288	0.9153	0.3411	1.4895		86	75	100	63	100	85
				X-26273	LC/MS pos late	65045								1.39885	1.27	1.46	2.47	2.15		0.4626	0.8452	0.0803	0.6739	0.5995	0.9998	0.3891	0.9792	0.8764	0.9989	0.2977	0.9315	0.1459	1		0.958	0.6088	1.3072	0.6907	1.6074	1.3401	0.7726	1.9075		71	50	100	63	100	92
				X-26274	LC/MS pos early	65053								0.551517	0.43	1.02	0.59	0.25		0.2228	0.8076	0.1188	0.6985	0.6857	0.9998	0.2651	0.9708	0.5414	0.9942	0.3325	0.9315	0.2084	1		2.077	3.3235	0.8305	2.3821	0.8404	1.1455	1.4407	0.8504		100	100	100	88	83	77
[truncated: 6 more columns]
